# Supplementary material for: Discovering master regulators in hepatocellular carcinoma: one novel MR, SEC14L2 inhibits cancer cells
Source: Aging (Albany NY). 2019 Dec 18;11(24):12375–411. doi: 10.18632/aging.102579 (PMC6949064; doi:10.18632/aging.102579)
Supplement: Supplementary Table 2 [file aging-11-102579-s004..xlsx]

## Sheet: DEG
GeneID	Symbol	Synonyms	logFC	FC	AveExpr	t	P.Value	adj.P.Val	B
6690	SPINK1	PCTT|PSTI|Spink3|TATI|TCP	2	4.01253	8.65708	13.71	3.34975e-41	6.53742e-40	82.6538
2719	GPC3	DGSX|GTR2-2|MXR7|OCI-5|SDYS|SGB|SGBS|SGBS1	1.97	3.92602	7.45869	18.14	7.29381e-69	1.35777e-66	145.904
57016	AKR1B10	AKR1B11|AKR1B12|ALDRLn|ARL-1|ARL1|HIS|HSI	1.93	3.80106	8.95523	14.75	4.02132e-47	1.19847e-45	96.1798
6364	CCL20	CKb4|Exodus|LARC|MIP-3-alpha|MIP-3a|MIP3A|SCYA20|ST38	1.72	3.30476	7.42271	16.95	8.51579e-61	7.41155e-59	127.446
9232	PTTG1	EAP1|HPTTG|PTTG|TUTR1	1.47	2.76313	6.82399	19.82	6.8537e-81	4.87822e-78	173.433
7153	TOP2A	TOP2|TP2A	1.42	2.67674	6.04156	19.26	9.45195e-77	3.81229e-74	163.956
1033	CDKN3	CDI1|CIP2|KAP|KAP1	1.38	2.59641	5.30374	19.86	3.76117e-81	2.84438e-78	174.029
9055	PRC1	ASE1	1.37	2.59246	5.88197	19.59	3.33597e-79	1.68188e-76	169.57
259266	ASPM	ASP|Calmbp1|MCPH5	1.37	2.57759	6.13003	18.86	6.37554e-74	2.14289e-71	157.481
2182	ACSL4	ACS4|FACL4|LACS4|MRX63|MRX68	1.33	2.5208	6.83393	17.58	5.24528e-65	6.9745e-63	137.079
991	CDC20	CDC20A|bA276H19.3|p55CDC	1.3	2.45468	5.53228	19.37	1.54665e-77	6.93128e-75	165.756
10537	UBD	FAT10|GABBR1|UBD-3	1.26	2.40058	10.3023	14.93	3.47957e-48	1.141e-46	98.6088
6286	S100P	MIG9	1.24	2.35632	5.64393	11.41	2.2007e-29	2.02498e-28	55.6916
4192	MDK	ARAP|MK|NEGF2	1.21	2.31699	6.39922	18.15	6.31344e-69	1.21258e-66	146.047
10486	CAP2	-	1.17	2.24557	7.37156	18.86	6.55586e-74	2.14394e-71	157.453
1306	COL15A1	-	1.13	2.1881	5.7316	16.09	2.62582e-55	1.55747e-53	114.892
23089	PEG10	EDR|HB-1|MEF3L|Mar2|Mart2|RGAG3|RTL2|SIRH1	1.1	2.14602	6.05333	11.46	1.35865e-29	1.26265e-28	56.1689
64151	NCAPG	CAPG|CHCG|NY-MEL-3|YCG1	1.08	2.11221	5.69448	18.66	1.85921e-72	4.9992e-70	154.128
6241	RRM2	R2|RR2|RR2M	1.05	2.07157	6.12105	14.1	2.39532e-43	5.42759e-42	87.5546
51203	NUSAP1	ANKT|BM037|LNP|NUSAP|PRO0310p1|Q0310|SAPL	1.04	2.05785	6.48134	18.77	2.78186e-73	8.41513e-71	156.016
29127	RACGAP1	CYK4|HsCYK-4|ID-GAP|MgcRacGAP	1.03	2.03998	6.39918	18.32	3.93572e-70	8.65858e-68	148.806
1282	COL4A1	BSVD|RATOR	1	2.00134	8.62519	19.19	2.80687e-76	1.06135e-73	162.874
9833	MELK	HPK38	0.99	1.98788	5.89582	17.02	2.58569e-61	2.35239e-59	128.63
55872	PBK	CT84|HEL164|Nori-3|SPK|TOPK	0.99	1.98759	5.05766	16.34	6.68265e-57	4.37082e-55	118.538
11065	UBE2C	UBCH10|dJ447F3.2	0.99	1.9851	6.32331	18.69	1.16037e-72	3.26523e-70	154.597
6713	SQLE	-	0.98	1.97571	6.68688	16.41	2.54266e-57	1.71878e-55	119.497
891	CCNB1	CCNB	0.98	1.96773	5.67338	15.64	1.88208e-52	8.62619e-51	108.363
83483	PLVAP	FELS|PV-1|PV1|gp68	0.97	1.96465	6.56477	18.51	2.12149e-71	5.134e-69	151.708
10112	KIF20A	MKLP2|RAB6KIFL	0.97	1.95415	5.11635	17.43	5.2796e-64	6.14261e-62	134.784
9133	CCNB2	HsT17299	0.95	1.93513	5.11078	19.27	8.08995e-77	3.37546e-74	164.111
51514	DTL	CDT2|DCAF2|L2DTL|RAMP	0.94	1.91882	5.77233	15.52	9.81281e-52	4.19558e-50	106.723
3934	LCN2	24p3|MSFI|NGAL|p25	0.93	1.91056	7.39888	9.68	9.45158e-22	5.56788e-21	38.3202
22974	TPX2	C20orf1|C20orf2|DIL-2|DIL2|FLS353|GD:C20orf1|HCA519|HCTP4|REPP86|p100	0.93	1.9102	5.62976	16.19	6.19486e-56	3.82438e-54	116.326
3161	HMMR	CD168|IHABP|RHAMM	0.93	1.90057	5.37844	17.51	1.53722e-64	1.93753e-62	136.01
55353	LAPTM4B	LAPTM4beta|LC27	0.91	1.88053	8.93031	14.69	8.53254e-47	2.49985e-45	95.4332
11130	ZWINT	HZwint-1|KNTC2AP|SIP30|ZWINT1	0.9	1.86825	6.24681	15.22	6.36943e-50	2.37139e-48	102.58
9787	DLGAP5	DLG7|HURP	0.9	1.86186	4.93678	16.67	5.10037e-59	3.8332e-57	123.38
5984	RFC4	A1|RFC37	0.89	1.85789	6.91055	17.45	3.64021e-64	4.31828e-62	135.154
7272	TTK	CT96|ESK|MPH1|MPS1|MPS1L1|PYT	0.89	1.85603	5.23048	14.84	1.20101e-47	3.77459e-46	97.3792
3315	HSPB1	CMT2F|HEL-S-102|HMN2B|HS.76067|HSP27|HSP28|Hsp25|SRP27	0.88	1.84382	11.3292	18.61	3.85818e-72	9.72583e-70	153.403
8644	AKR1C3	DD3|DDX|HA1753|HAKRB|HAKRe|HSD17B5|PGFS|hluPGFS	0.88	1.83779	11.7843	18.07	2.40383e-68	4.40702e-66	144.719
3326	HSP90AB1	D6S182|HSP84|HSP90B|HSPC2|HSPCB	0.87	1.83309	10.3384	19.61	2.77514e-79	1.45996e-76	169.753
4171	MCM2	BM28|CCNL1|CDCL1|D3S3194|DFNA70|MITOTIN|cdc19	0.87	1.82276	5.961	16.62	1.14542e-58	8.34916e-57	122.577
56667	MUC13	DRCC1|MUC-13	0.86	1.81535	5.7229	11.97	4.25948e-32	4.57318e-31	61.8764
1164	CKS2	CKSHS2	0.86	1.81095	7.87691	15.94	2.50014e-54	1.34452e-52	112.654
2146	EZH2	ENX-1|ENX1|EZH2b|KMT6|KMT6A|WVS|WVS2	0.86	1.81003	5.6625	15.95	2.21903e-54	1.20405e-52	112.772
1894	ECT2	ARHGEF31	0.85	1.80119	5.46446	16.84	3.88222e-60	3.21746e-58	125.939
4758	NEU1	NANH|NEU|SIAL1	0.85	1.79752	7.8011	17.94	1.85943e-67	3.04041e-65	142.685
3608	ILF2	NF45|PRO3063	0.85	1.79685	8.97271	18.46	4.65704e-71	1.1049e-68	150.927
51053	GMNN	Gem|MGORS6	0.83	1.77545	8.18658	16.27	2.02054e-56	1.28003e-54	117.439
6819	SULT1C2	ST1C1|ST1C2|SULT1C1|humSULTC2	0.82	1.76824	5.29267	12.45	1.66397e-34	2.1216e-33	67.369
3992	FADS1	D5D|FADS6|FADSD5|LLCDL1|TU12	0.81	1.75799	7.7712	12.81	2.29848e-36	3.26427e-35	71.6124
24137	KIF4A	KIF4|KIF4G1|MRX100	0.81	1.75522	4.79548	15.69	9.14975e-53	4.32468e-51	109.079
8682	PEA15	HMAT1|HUMMAT1H|MAT1|MAT1H|PEA-15|PED|PED-PEA15|PED/PEA15	0.8	1.74308	8.63111	20.76	6.95385e-88	1.68283e-84	189.445
6790	AURKA	AIK|ARK1|AURA|BTAK|PPP1R47|STK15|STK6|STK7	0.8	1.7422	5.64706	18.51	1.94451e-71	4.80176e-69	151.795
10403	NDC80	HEC|HEC1|HsHec1|KNTC2|TID3|hsNDC80	0.8	1.7403	5.40353	14.38	5.73184e-45	1.4449e-43	91.258
10535	RNASEH2A	AGS4|JUNB|RNASEHI|RNHIA|RNHL	0.8	1.74024	5.50746	18.71	7.46232e-73	2.14986e-70	155.036
6091	ROBO1	DUTT1|SAX3	0.8	1.73729	7.56278	11.9	1.01209e-31	1.05937e-30	61.0194
64754	SMYD3	KMT3E|ZMYND1|ZNFN3A1|bA74P14.1	0.79	1.73005	6.45219	15.32	1.48601e-50	5.76304e-49	104.025
983	CDK1	CDC2|CDC28A|P34CDC2	0.78	1.72269	5.09275	15.88	5.30571e-54	2.74355e-52	111.906
6696	SPP1	BNSP|BSPI|ETA-1|OPN	0.77	1.70542	8.14856	8.3	1.68683e-16	7.26357e-16	26.4061
2810	SFN	YWHAS	0.76	1.69834	5.91528	12.02	2.58233e-32	2.82261e-31	62.372
10644	IGF2BP2	IMP-2|IMP2|VICKZ2	0.75	1.68497	6.14174	12.68	1.09774e-35	1.50597e-34	70.0628
100133941	CD24	CD24A	0.75	1.68431	8.42459	10.2	6.51347e-24	4.33514e-23	43.2347
4069	LYZ	LYZF1|LZM	0.75	1.68165	9.47799	10.22	5.00397e-24	3.35447e-23	43.4952
10055	SAE1	AOS1|HSPC140|SUA1|UBLE1A	0.75	1.67915	8.0197	21.28	6.64348e-92	2.00965e-88	198.65
65265	C8orf33	-	0.75	1.67621	6.87593	18.29	7.3286e-70	1.55189e-67	148.188
55355	HJURP	FAKTS|URLC9|hFLEG1	0.74	1.67246	4.92363	16.64	8.06637e-59	5.91534e-57	122.925
7371	UCK2	TSA903|UK|UMPK	0.74	1.66919	6.08591	18.34	3.2962e-70	7.38593e-68	148.982
22943	DKK1	DKK-1|SK	0.73	1.65982	4.93432	7.85	6.27818e-15	2.48417e-14	22.8523
9319	TRIP13	16E1BP|MVA3	0.73	1.65871	4.96799	14.27	2.53653e-44	6.08969e-43	89.7823
1728	NQO1	DHQU|DIA4|DTD|NMOR1|NMORI|QR1	0.72	1.65173	5.94071	8.36	1.05319e-16	4.58237e-16	26.8694
29028	ATAD2	ANCCA|CT137|PRO2000	0.72	1.65042	6.87238	14.44	2.65774e-45	6.93073e-44	92.0207
4175	MCM6	MCG40308|Mis5|P105MCM	0.72	1.64988	7.21321	17.73	4.84311e-66	6.8943e-64	139.446
4318	MMP9	CLG4B|GELB|MANDP2|MMP-9	0.72	1.64419	5.58336	11.68	1.10088e-30	1.09097e-29	58.6563
1047	CLGN	-	0.71	1.64113	5.14307	10.73	2.96537e-26	2.25383e-25	48.5636
4172	MCM3	HCC5|P1-MCM3|P1.h|RLFB	0.71	1.64092	7.67508	16.32	8.99031e-57	5.81726e-55	118.243
174	AFP	AFPD|FETA|HPAFP	0.71	1.63909	6.46128	6.31	3.33234e-10	9.79386e-10	12.2082
1690	COCH	COCH-5B2|COCH5B2|DFNA9	0.71	1.63776	5.31642	12.96	4.06793e-37	6.0395e-36	73.3288
9540	TP53I3	PIG3	0.71	1.6363	6.5011	14	8.70673e-43	1.92247e-41	86.2743
10963	STIP1	HEL-S-94n|HOP|IEF-SSP-3521|P60|STI1|STI1L	0.71	1.63473	7.47068	16.86	3.32937e-60	2.7783e-58	126.091
5168	ENPP2	ATX|ATX-X|AUTOTAXIN|LysoPLD|NPP2|PD-IALPHA|PDNP2	0.71	1.63161	8.16795	11.31	6.68565e-29	5.94826e-28	54.592
890	CCNA2	CCN1|CCNA	0.7	1.62715	5.28894	15.59	3.65513e-52	1.63199e-50	107.704
51155	JPT1	ARM2|HN1|HN1A	0.69	1.61803	6.4757	15.91	3.49224e-54	1.85541e-52	112.322
3915	LAMC1	LAMB2	0.69	1.61426	8.52554	15.75	3.81515e-53	1.83918e-51	109.947
5723	PSPH	PSP|PSPHD	0.69	1.61381	6.58552	15.42	3.98645e-51	1.64068e-49	105.331
27347	STK39	DCHT|PASK|SPAK	0.69	1.61181	6.13465	11.85	1.74632e-31	1.80602e-30	60.4792
2237	FEN1	FEN-1|MF1|RAD2	0.69	1.61086	6.39242	16.8	7.70686e-60	6.25859e-58	125.258
5557	PRIM1	p49	0.68	1.60698	6.09694	13.56	2.34845e-40	4.31857e-39	80.7224
11339	OIP5	5730547N13Rik|CT86|LINT-25|MIS18B|MIS18beta|hMIS18beta	0.68	1.60542	4.82483	15.48	1.69324e-51	7.16373e-50	106.181
8490	RGS5	MST092|MST106|MST129|MSTP032|MSTP092|MSTP106|MSTP129	0.68	1.60265	7.27882	15.8	1.80229e-53	8.90111e-52	110.692
6281	S100A10	42C|ANX2L|ANX2LG|CAL1L|CLP11|Ca[1]|GP11|P11|p10	0.68	1.60074	10.2168	16.46	1.17642e-57	8.08788e-56	120.263
7070	THY1	CD90|CDw90	0.68	1.5999	5.9692	15.28	2.84649e-50	1.0797e-48	103.38
84790	TUBA1C	TUBA6|bcm948	0.68	1.5994	10.898	17.97	1.04459e-67	1.75548e-65	143.259
1163	CKS1B	CKS1|PNAS-16|PNAS-18|ckshs1	0.67	1.59153	8.5387	15.62	2.46395e-52	1.12505e-50	108.095
7203	CCT3	CCT-gamma|CCTG|PIG48|TCP-1-gamma|TRIC5	0.67	1.59141	9.88935	19.54	7.76546e-79	3.75848e-76	168.73
1192	CLIC1	CL1C1|G6|NCC27	0.67	1.59131	9.54326	17	3.46849e-61	3.08593e-59	128.338
7086	TKT	HEL-S-48|HEL107|SDDHD|TK|TKT1	0.67	1.59129	8.4359	13.94	1.92667e-42	4.1408e-41	85.4864
7286	TUFT1	-	0.67	1.59091	6.8817	14.94	3.04064e-48	1.0025e-46	98.7427
2305	FOXM1	FKHL16|FOXM1B|HFH-11|HFH11|HNF-3|INS-1|MPHOSPH2|MPP-2|MPP2|PIG29|TRIDENT	0.67	1.59024	4.76516	14.94	2.89155e-48	9.55951e-47	98.7926
3838	KPNA2	IPOA1|QIP2|RCH1|SRP1-alpha|SRP1alpha	0.67	1.58781	8.15646	15.87	7.01439e-54	3.56614e-52	111.629
5420	PODXL	Gp200|PC|PCLP|PCLP-1	0.66	1.58388	6.75941	17.3	3.56456e-63	3.851e-61	132.887
10262	SF3B4	AFD1|Hsh49|SAP49|SF3b49	0.66	1.57842	8.36269	17.82	1.23487e-66	1.82218e-64	140.804
7429	VIL1	D2S1471|VIL	0.66	1.57603	5.39147	11.07	9.09978e-28	7.55194e-27	52.009
28984	RGCC	C13orf15|RGC-32|RGC32|bA157L14.2	0.66	1.57534	6.55056	14.21	5.08318e-44	1.19199e-42	89.0926
3832	KIF11	EG5|HKSP|KNSL1|MCLMR|TRIP5	0.66	1.57531	4.77313	13.77	1.522e-41	3.05411e-40	83.4362
8875	VNN2	FOAP-4|GPI-80	0.65	1.5744	5.44693	11.31	6.94205e-29	6.16279e-28	54.5548
4751	NEK2	HsPK21|NEK2A|NLK1|PPP1R111|RP67	0.65	1.56999	5.02286	15.39	5.83433e-51	2.36897e-49	104.953
10962	MLLT11	AF1Q	0.65	1.56912	6.52891	12.13	7.44753e-33	8.52555e-32	63.6034
58528	RRAGD	RAGD|bA11D8.2.1	0.65	1.56854	7.68807	12.99	2.81552e-37	4.24257e-36	73.6936
10643	IGF2BP3	CT98|IMP-3|IMP3|KOC|KOC1|VICKZ3	0.65	1.56744	4.65307	12.36	4.90575e-34	6.10068e-33	66.2979
1019	CDK4	CMM3|PSK-J3	0.64	1.56267	8.45779	17.83	9.41835e-67	1.42453e-64	141.073
47	ACLY	ACL|ATPCL|CLATP	0.64	1.56234	7.91273	19.76	2.05727e-80	1.26937e-77	172.34
58526	MID1IP1	G12-like|MIG12|S14R|STRAIT11499|THRSPL	0.64	1.56161	7.32774	15.58	4.09491e-52	1.80833e-50	107.591
5546	PRCC	RCCP1|TPRC	0.64	1.55992	7.36412	18.03	4.09536e-68	7.39609e-66	144.189
1290	COL5A2	EDSC	0.64	1.55854	7.32201	11.94	6.35527e-32	6.7455e-31	61.4801
10635	RAD51AP1	PIR51	0.64	1.55565	5.70757	13.16	3.29682e-38	5.27665e-37	75.8198
6633	SNRPD2	SMD2|SNRPD1|Sm-D2	0.64	1.55471	10.0561	19.69	6.87123e-80	3.77918e-77	171.141
7283	TUBG1	CDCBM4|GCP-1|TUBG|TUBGCP1	0.63	1.54808	7.27609	16.56	2.64596e-58	1.8833e-56	121.745
55165	CEP55	C10orf3|CT111|URCC6	0.63	1.54679	4.62309	14.42	3.21995e-45	8.34291e-44	91.8303
10376	TUBA1B	K-ALPHA-1	0.63	1.54666	11.0554	19.23	1.4198e-76	5.54179e-74	163.552
23212	RRS1	-	0.62	1.54019	6.9872	15.35	1.04727e-50	4.15474e-49	104.372
51186	TCEAL9	WBP5|WEX6	0.62	1.5387	8.42711	11.6	2.88134e-30	2.78246e-29	57.7039
2634	GBP2	-	0.62	1.53721	8.4678	13.74	2.51507e-41	4.9564e-40	82.9381
8788	DLK1	DLK|DLK-1|Delta1|FA1|PREF1|Pref-1|ZOG|pG2	0.62	1.53296	4.86027	6.8	1.32287e-11	4.26068e-11	15.3556
79682	CENPU	CENP50|CENPU50|KLIP1|MLF1IP|PBIP1	0.62	1.53191	5.6291	11.7	8.87015e-31	8.84821e-30	58.8702
7791	ZYX	ESP-2|HED-2	0.62	1.53171	7.72293	17.06	1.43909e-61	1.33946e-59	129.212
145389	SLC38A6	NAT-1|SNAT6	0.61	1.53119	6.61939	14.93	3.5222e-48	1.15185e-46	98.5967
5050	PAFAH1B3	PAFAHG	0.61	1.53061	5.81846	13.31	5.60898e-39	9.40009e-38	77.5758
22919	MAPRE1	EB1	0.61	1.52981	7.82491	17.17	2.6758e-62	2.61107e-60	130.884
4224	MEP1A	PPHA	0.61	1.52914	4.47152	10.67	5.54251e-26	4.12197e-25	47.9452
7296	TXNRD1	GRIM-12|TR|TR1|TRXR1|TXNR	0.61	1.52655	7.76364	14.96	2.21727e-48	7.4525e-47	99.0561
29097	CNIH4	CNIH-4|CNIH2|HSPC163	0.61	1.52622	8.22974	16.31	1.15905e-56	7.45984e-55	117.991
8407	TAGLN2	HA1756	0.61	1.52603	8.69618	13.85	5.81078e-42	1.20395e-40	84.3913
302	ANXA2	ANX2|ANX2L4|CAL1H|HEL-S-270|LIP2|LPC2|LPC2D|P36|PAP-IV	0.61	1.5257	9.37664	17.02	2.76879e-61	2.50018e-59	128.562
9928	KIF14	MKS12	0.61	1.52419	5.02217	13.35	3.0834e-39	5.29207e-38	78.1691
79023	NUP37	p37	0.61	1.52281	6.77571	17.7	7.79704e-66	1.08442e-63	138.973
8910	SGCE	DYT11|ESG|epsilon-SG	0.61	1.5214	7.78322	9.1	1.92014e-19	9.79911e-19	33.0794
3015	H2AFZ	H2A.Z-1|H2A.z|H2A/z|H2AZ	0.6	1.51907	9.87648	15.25	4.21171e-50	1.59255e-48	102.991
10460	TACC3	ERIC-1|ERIC1	0.6	1.51802	5.58643	15.39	5.88048e-51	2.37973e-49	104.945
6905	TBCE	HRD|KCS|KCS1|PEAMO|pac2	0.6	1.51606	7.28855	16.21	4.54424e-56	2.81976e-54	116.634
1063	CENPF	CENF|CILD31|PRO1779|STROMS|hcp-1	0.6	1.51426	5.14852	15.54	6.92032e-52	2.99057e-50	107.07
6628	SNRPB	CCMS|COD|SNRPB1|Sm-B/B'|SmB/B'|SmB/SmB'|snRNP-B	0.6	1.5132	9.24165	17.28	5.39324e-63	5.62571e-61	132.475
2697	GJA1	AVSD3|CMDR|CX43|EKVP|EKVP3|GJAL|HLHS1|HSS|ODDD|PPKCA	0.6	1.51095	7.54158	12.61	2.57215e-35	3.45812e-34	69.219
7037	TFRC	CD71|IMD46|T9|TFR|TFR1|TR|TRFR|p90	0.59	1.5097	8.69006	14.5	1.21332e-45	3.26975e-44	92.7988
10067	SCAMP3	C1orf3	0.59	1.50713	8.05321	18.36	2.15104e-70	4.91086e-68	149.406
7443	VRK1	PCH1|PCH1A	0.59	1.50659	6.03954	16.45	1.31168e-57	8.96685e-56	120.155
9768	PCLAF	KIAA0101|L5|NS5ATP9|OEATC|OEATC-1|OEATC1|PAF|PAF15|p15(PAF)|p15/PAF|p15PAF	0.59	1.50621	6.71657	14.93	3.41177e-48	1.1218e-46	98.6283
83461	CDCA3	GRCC8|TOME-1	0.59	1.50575	5.00422	16.02	7.60748e-55	4.32162e-53	113.835
10457	GPNMB	HGFIN|NMB	0.59	1.50377	7.63902	10.1	1.72441e-23	1.11401e-22	42.2731
528	ATP6V1C1	ATP6C|ATP6D|VATC|Vma5	0.59	1.50354	6.43521	17.3	3.93718e-63	4.20362e-61	132.788
142	PARP1	ADPRT|ADPRT 1|ADPRT1|ARTD1|PARP|PARP-1|PPOL|pADPRT-1	0.59	1.50278	8.78706	18.87	5.60094e-74	1.93633e-71	157.61
79019	CENPM	C22orf18|CENP-M|PANE1	0.59	1.50214	4.84941	14.49	1.24272e-45	3.34152e-44	92.775
3485	IGFBP2	IBP2|IGF-BP53	-0.59	-1.50023	9.91197	-7.03	2.76568e-12	9.29832e-12	16.8856
1066	CES1	ACAT|CE-1|CEH|CES2|HMSE|HMSE1|PCE-1|REH|SES1|TGH|hCE-1	-0.59	-1.50033	11.8808	-9.33	2.48601e-20	1.33633e-19	35.0947
8659	ALDH4A1	ALDH4|P5CD|P5CDh	-0.59	-1.50117	8.50208	-13.72	3.13714e-41	6.14229e-40	82.7189
6568	SLC17A1	NAPI-1|NPT-1|NPT1	-0.59	-1.50121	5.34861	-14.62	2.427e-46	6.81363e-45	94.3958
5624	PROC	APC|PC|PROC1|THPH3|THPH4	-0.59	-1.50155	10.604	-13.02	1.82005e-37	2.78063e-36	74.1261
57088	PLSCR4	TRA1	-0.59	-1.50163	8.57328	-13.08	9.00299e-38	1.39305e-36	74.8238
2327	FMO2	FMO1B1	-0.59	-1.50332	5.61196	-11.61	2.57198e-30	2.48968e-29	57.8163
10400	PEMT	PEAMT|PEMPT|PEMT2|PLMT|PNMT	-0.59	-1.50394	8.53527	-12.85	1.49046e-36	2.13933e-35	72.0417
3598	IL13RA2	CD213A2|CT19|IL-13R|IL13BP	-0.59	-1.50527	4.93437	-10.18	8.07612e-24	5.34287e-23	43.0223
1672	DEFB1	BD1|DEFB-1|DEFB101|HBD1	-0.59	-1.50576	10.0273	-5.96	2.852e-09	7.87162e-09	10.12
847	CAT	-	-0.59	-1.50853	9.64095	-14.87	7.58427e-48	2.40235e-46	97.8354
51156	SERPINA10	PZI|ZPI	-0.59	-1.509	10.6359	-11.16	3.50451e-28	2.97785e-27	52.9529
7704	ZBTB16	PLZF|ZNF145	-0.59	-1.50922	7.55641	-10.52	2.57942e-25	1.8468e-24	46.4252
9071	CLDN10	CPETRL3|HELIX|OSP-L|OSPL	-0.59	-1.50945	4.91276	-12.42	2.59909e-34	3.27935e-33	66.9272
3764	KCNJ8	KIR6.1|uKATP-1	-0.59	-1.50972	8.26486	-11	1.86069e-27	1.51714e-26	51.3015
9122	SLC16A4	MCT4|MCT5	-0.6	-1.5114	5.8575	-12.07	1.40159e-32	1.56451e-31	62.9772
8777	MPDZ	HYC2|MUPP1	-0.6	-1.51544	8.70725	-12.36	5.26092e-34	6.50891e-33	66.2286
5207	PFKFB1	F6PK|HL2K|PFRX	-0.6	-1.51644	6.02603	-11.87	1.40584e-31	1.46391e-30	60.694
9388	LIPG	EDL|EL|PRO719	-0.6	-1.52043	7.60228	-11.07	8.59474e-28	7.15735e-27	52.0655
6506	SLC1A2	EAAT2|EIEE41|GLT-1|HBGT	-0.61	-1.52266	5.96471	-10.75	2.37626e-26	1.82325e-25	48.7826
4306	NR3C2	MCR|MLR|MR|NR3C2VIT	-0.61	-1.52396	6.0927	-15.09	4.08097e-49	1.4313e-47	100.736
28992	MACROD1	LRP16	-0.61	-1.52838	6.62115	-17	4.01729e-61	3.54811e-59	128.192
9104	RGN	GNL|HEL-S-41|RC|SMP30	-0.61	-1.52881	9.67892	-10.94	3.32783e-27	2.67021e-26	50.7265
2028	ENPEP	APA|CD249|gp160	-0.61	-1.53027	7.57734	-12.23	2.20543e-33	2.61881e-32	64.8088
3487	IGFBP4	BP-4|HT29-IGFBP|IBP4|IGFBP-4	-0.62	-1.53209	11.1277	-13.16	3.33384e-38	5.32886e-37	75.8087
10157	AASS	LKR/SDH|LKRSDH|LORSDH	-0.62	-1.53319	6.98438	-10.2	6.59859e-24	4.38939e-23	43.2219
54923	LIME1	LIME|dJ583P15.4	-0.62	-1.53424	9.10868	-12.54	6.22154e-35	8.14726e-34	68.3438
4051	CYP4F3	CPF3|CYP4F|LTB4H	-0.62	-1.53477	9.20474	-11.46	1.3331e-29	1.24081e-28	56.1877
1610	DAO	DAAO|DAMOX|OXDA	-0.62	-1.53536	7.63913	-9.89	1.29247e-22	8.01173e-22	40.2841
29881	NPC1L1	NPC11L1	-0.62	-1.53884	5.97647	-12.07	1.48562e-32	1.65221e-31	62.9195
6288	SAA1	PIG4|SAA|SAA2|TP53I4	-0.62	-1.53994	8.7518	-6.26	4.60303e-10	1.34015e-09	11.8936
6514	SLC2A2	GLUT2	-0.62	-1.54034	11.4183	-8.88	1.29117e-18	6.28953e-18	31.2017
715	C1R	EDSPD1	-0.62	-1.54137	10.2536	-12.5	9.19191e-35	1.19465e-33	67.957
25837	RAB26	V46133	-0.62	-1.54216	6.2724	-13.39	2.0384e-39	3.52857e-38	78.5795
3081	HGD	AKU|HGO	-0.63	-1.54234	9.74757	-12.4	2.97487e-34	3.7379e-33	66.7934
1962	EHHADH	ECHD|FRTS3|L-PBE|LBFP|LBP|PBFE	-0.63	-1.5471	10.1398	-10.35	1.39175e-24	9.62848e-24	44.7595
4482	MSRA	PMSR	-0.63	-1.54852	7.38685	-15.6	3.05463e-52	1.38951e-50	107.882
9380	GRHPR	GLXR|GLYD|PH2	-0.63	-1.54961	10.2831	-14.12	1.76683e-43	4.04134e-42	87.8565
10864	SLC22A7	NLT|OAT2|hOAT11	-0.63	-1.55019	7.8965	-9.43	1.00728e-20	5.50004e-20	35.9857
5947	RBP1	CRABP-I|CRBP|CRBP1|CRBPI|RBPC	-0.63	-1.55061	7.6837	-9.88	1.41368e-22	8.74516e-22	40.1956
5502	PPP1R1A	I1|IPP1	-0.63	-1.55086	8.1773	-9.06	2.62196e-19	1.3291e-18	32.7724
1036	CDO1	CDO-I	-0.63	-1.5523	10.3334	-9.09	2.16382e-19	1.10195e-18	32.9616
1370	CPN2	ACBP	-0.64	-1.55349	9.9667	-10.39	9.14002e-25	6.38166e-24	45.175
10516	FBLN5	ADCL2|ARCL1A|ARMD3|DANCE|EVEC|FIBL-5|HNARMD|UP50	-0.64	-1.55478	6.66713	-10.72	3.51439e-26	2.65444e-25	48.3956
722	C4BPA	C4BP|PRP	-0.64	-1.55538	12.5832	-9.12	1.5881e-19	8.14581e-19	33.2665
10402	ST3GAL6	SIAT10|ST3GALVI	-0.64	-1.5556	6.37607	-18.66	1.84612e-72	4.9992e-70	154.135
10247	RIDA	HRSP12|P14.5|PSP|UK114|hp14.5	-0.64	-1.55639	10.1918	-11.71	7.94435e-31	7.93779e-30	58.9793
5118	PCOLCE	PCPE|PCPE-1|PCPE1	-0.64	-1.55726	8.09064	-11.47	1.10895e-29	1.03456e-28	56.3699
4616	GADD45B	GADD45BETA|MYD118	-0.64	-1.55865	8.04896	-12.85	1.50042e-36	2.15108e-35	72.0351
1564	CYP2D7	CYP2D|CYP2D7AP|CYP2D7P|CYP2D7P1|CYP2D@|P450C2D|P450DB1|RNA40057	-0.64	-1.55956	9.59608	-9.55	3.15721e-21	1.79017e-20	37.1301
55107	ANO1	DOG1|ORAOV2|TAOS2|TMEM16A	-0.64	-1.56013	6.98393	-10.6	1.10632e-25	8.08848e-25	47.262
64231	MS4A6A	4SPAN3|4SPAN3.2|CD20L3|CDA01|MS4A6|MST090|MSTP090	-0.64	-1.56129	7.35707	-11.38	3.10643e-29	2.84111e-28	55.3505
6360	CCL16	CKb12|HCC-4|ILINCK|LCC-1|LEC|LMC|Mtn-1|NCC-4|NCC4|SCYA16|SCYL4	-0.64	-1.56225	8.89386	-8.93	8.77578e-19	4.3183e-18	31.582
383	ARG1	-	-0.65	-1.56379	10.0794	-9.38	1.55731e-20	8.43485e-20	35.5559
27329	ANGPTL3	ANG-5|ANGPT5|ANL3|FHBL2	-0.65	-1.56402	9.79338	-10.7	4.31942e-26	3.24426e-25	48.1917
23541	SEC14L2	C22orf6|SPF|TAP|TAP1	-0.65	-1.56413	6.92379	-12.43	2.27636e-34	2.87815e-33	67.0586
18	ABAT	GABA-AT|GABAT|NPD009	-0.65	-1.56484	9.07771	-13.39	2.03743e-39	3.52857e-38	78.5799
3155	HMGCL	HL	-0.65	-1.56771	9.52351	-16.48	9.05448e-58	6.29651e-56	120.523
6567	SLC16A2	AHDS|DXS128|DXS128E|MCT 7|MCT 8|MCT7|MCT8|MRX22|XPCT	-0.65	-1.56858	7.394	-13.74	2.23202e-41	4.4202e-40	83.0565
83752	LONP2	LONP|LONPL|PLON|PSLON	-0.65	-1.56892	8.31229	-16.18	7.9096e-56	4.83365e-54	116.083
36	ACADSB	2-MEBCAD|ACAD7|SBCAD	-0.65	-1.57424	8.82961	-13.51	4.42407e-40	7.98974e-39	80.0944
10786	SLC17A3	GOUT4|NPT4|UAQTL4	-0.65	-1.57458	6.97594	-9.98	5.45402e-23	3.45155e-22	41.1359
443	ASPA	ACY2|ASP	-0.66	-1.57471	5.24573	-13.97	1.2095e-42	2.64647e-41	85.9482
7276	TTR	ATTR|CTS|CTS1|HEL111|HsT2651|PALB|TBPA	-0.66	-1.57566	13.2891	-8.96	6.43707e-19	3.1974e-18	31.8874
83604	TMEM47	BCMP1|TM4SF10|VAB-9	-0.66	-1.57611	7.82844	-13	2.47417e-37	3.74856e-36	73.8217
7367	UGT2B17	BMND12|UDPGT2B17	-0.66	-1.57741	5.74618	-7.81	8.68323e-15	3.41127e-14	22.534
1621	DBH	DBM	-0.66	-1.57761	4.70254	-19.76	2.09814e-80	1.26937e-77	172.32
23743	BHMT2	-	-0.66	-1.57833	10.013	-11.61	2.43018e-30	2.3543e-29	57.8725
3697	ITIH1	H1P|IATIH|IGHEP1|ITI-HC1|ITIH|SHAP	-0.66	-1.5839	11.7015	-11.05	1.0828e-27	8.93104e-27	51.837
51279	C1RL	C1RL1|C1RLP|C1r-LP|CLSPa	-0.67	-1.5865	8.97685	-17.07	1.33091e-61	1.25812e-59	129.29
10166	SLC25A15	D13S327|HHH|ORC1|ORNT1	-0.67	-1.58781	8.87875	-11.43	1.85895e-29	1.71836e-28	55.8587
3131	HLF	-	-0.67	-1.58808	8.37812	-11.55	4.98269e-30	4.74356e-29	57.1618
1556	CYP2B7P	CYP2B|CYP2B7|CYP2B7P1	-0.67	-1.58898	7.8223	-7.46	1.25498e-13	4.59323e-13	19.914
7498	XDH	XAN1|XO|XOR	-0.67	-1.59001	7.41193	-11.38	3.24316e-29	2.96168e-28	55.3079
80303	EFHD1	MST133|MSTP133|PP3051|SWS2	-0.67	-1.59171	6.74181	-10.61	1.01363e-25	7.44233e-25	47.3485
25878	MXRA5	-	-0.67	-1.59317	6.59231	-11.78	3.60134e-31	3.67422e-30	59.7626
5244	ABCB4	ABC21|GBD1|ICP3|MDR2|MDR2/3|MDR3|PFIC-3|PGY3	-0.67	-1.59413	9.65047	-9.5	5.15554e-21	2.8774e-20	36.6463
229	ALDOB	ALDB|ALDO2	-0.67	-1.59439	10.4347	-10.39	9.37649e-25	6.53923e-24	45.1497
11001	SLC27A2	ACSVL1|FACVL1|FATP2|HsT17226|VLACS|VLCS|hFACVL1	-0.67	-1.5945	10.25	-9.45	7.78222e-21	4.29584e-20	36.2401
51268	PIPOX	LPIPOX	-0.67	-1.59521	10.5834	-11.18	2.68487e-28	2.30077e-27	53.2165
221078	NSUN6	4933414E04Rik|ARL5B-AS1|NOPD1	-0.67	-1.59594	7.54718	-14.48	1.60109e-45	4.24852e-44	92.5236
30	ACAA1	ACAA|PTHIO|THIO	-0.68	-1.597	10.2162	-15.4	5.05062e-51	2.06461e-49	105.096
79974	CPED1	C7orf58	-0.68	-1.59952	6.23536	-16.79	9.11952e-60	7.35641e-58	125.09
64284	RAB17	-	-0.68	-1.59992	8.94254	-15.29	2.42124e-50	9.27033e-49	103.54
10912	GADD45G	CR6|DDIT2|GADD45gamma|GRP17	-0.68	-1.60285	7.34102	-11.15	3.53181e-28	2.99474e-27	52.9453
4485	MST1	D3F15S2|DNF15S2|HGFL|MSP|NF15S2	-0.68	-1.60313	10.8993	-13.96	1.34992e-42	2.93777e-41	85.8393
54941	RNF125	TNORS|TRAC-1|TRAC1	-0.68	-1.60391	6.75436	-13.92	2.28987e-42	4.91267e-41	85.315
8842	PROM1	AC133|CD133|CORD12|MCDR2|MSTP061|PROML1|RP41|STGD4	-0.68	-1.60769	5.37893	-9.93	9.19466e-23	5.73777e-22	40.6203
8856	NR1I2	BXR|ONR1|PAR|PAR1|PAR2|PARq|PRR|PXR|SAR|SXR	-0.69	-1.60889	6.67294	-15.56	5.08182e-52	2.21187e-50	107.376
10747	MASP2	MAP19|MASP-2|MASP1P1|sMAP	-0.69	-1.60938	7.52341	-13.31	5.13472e-39	8.64119e-38	77.6634
84869	CBR4	SDR45C1	-0.69	-1.6109	7.95434	-18.62	3.54063e-72	9.11523e-70	153.488
11145	PLA2G16	AdPLA|H-REV107|H-REV107-1|HRASLS3|HREV107|HREV107-1|HREV107-3|HRSL3	-0.69	-1.61386	7.55711	-17.7	7.93909e-66	1.09163e-63	138.955
2939	GSTA2	GST2|GSTA2-2|GTA2|GTH2	-0.69	-1.61401	11.6398	-8.2	3.98902e-16	1.68354e-15	25.5599
51733	UPB1	BUP1	-0.69	-1.61502	9.36989	-10.1	1.67148e-23	1.0827e-22	42.3039
6783	SULT1E1	EST|EST-1|ST1E1|STE	-0.69	-1.61522	5.93687	-11.07	8.7915e-28	7.31115e-27	52.0431
9970	NR1I3	CAR|CAR1|MB67	-0.69	-1.61738	7.2269	-11.05	1.1165e-27	9.20278e-27	51.8067
5345	SERPINF2	A2AP|AAP|ALPHA-2-PI|API|PLI	-0.7	-1.62148	10.4657	-12.52	7.68456e-35	1.00414e-33	68.1345
3248	HPGD	15-PGDH|PGDH|PGDH1|PHOAR1|SDR36C1	-0.7	-1.6223	8.0086	-8.32	1.5135e-16	6.52882e-16	26.5128
10216	PRG4	CACP|HAPO|JCAP|MSF|SZP	-0.7	-1.62371	7.08596	-9.58	2.50324e-21	1.43483e-20	37.3591
154661	RUNDC3B	RPIB9|RPIP9	-0.7	-1.62754	7.45861	-12.48	1.28344e-34	1.64161e-33	67.6263
217	ALDH2	ALDH-E2|ALDHI|ALDM	-0.7	-1.62769	12.1721	-15.94	2.43554e-54	1.31563e-52	112.68
10891	PPARGC1A	LEM6|PGC-1(alpha)|PGC-1alpha|PGC-1v|PGC1|PGC1A|PPARGC1	-0.71	-1.63296	7.65654	-12.21	2.75196e-33	3.23917e-32	64.5895
80765	STARD5	-	-0.71	-1.63332	5.87212	-17.81	1.45226e-66	2.11715e-64	140.643
6715	SRD5A1	S5AR 1	-0.71	-1.63353	7.77863	-14.58	4.10796e-46	1.14267e-44	93.8735
367	AR	AIS|AR8|DHTR|HUMARA|HYSP1|KD|NR3C4|SBMA|SMAX1|TFM	-0.71	-1.6367	6.60489	-14.45	2.30585e-45	6.03913e-44	92.1616
23708	GSPT2	ERF3B|GST2	-0.71	-1.63779	6.69074	-11.85	1.74863e-31	1.80687e-30	60.4779
3240	HP	BP|HP2ALPHA2|HPA1S	-0.71	-1.6396	14.1115	-9.51	4.42417e-21	2.4818e-20	36.7972
115817	DHRS1	SDR19C1	-0.71	-1.63987	9.95042	-13.9	2.99978e-42	6.37914e-41	85.0472
8630	HSD17B6	HSE|RODH|SDR9C6	-0.71	-1.64035	11.5754	-7.98	2.23643e-15	9.06254e-15	23.866
633	BGN	DSPG1|MRLS|PG-S1|PGI|SEMDX|SLRR1A	-0.71	-1.64123	8.81685	-12.31	9.03366e-34	1.09857e-32	65.693
763	CA5A	CA5|CA5AD|CAV|CAVA|GS1-21A4.1	-0.72	-1.6422	7.13954	-14.77	3.1794e-47	9.64178e-46	96.413
57447	NDRG2	SYLD	-0.72	-1.64288	7.52958	-17.49	1.97002e-64	2.40781e-62	135.764
10840	ALDH1L1	10-FTHFDH|10-fTHF|FDH|FTHFD	-0.72	-1.64374	8.41125	-11.85	1.71824e-31	1.78003e-30	60.4953
51380	CSAD	CSD|PCAP	-0.72	-1.64496	7.26855	-19.96	6.33621e-82	5.11121e-79	175.8
10584	COLEC10	3MC3|CL-34|CLL1	-0.72	-1.6458	4.78696	-16.4	2.94404e-57	1.97905e-55	119.352
3026	HABP2	FSAP|HABP|HGFAL|NMTC5|PHBP	-0.72	-1.64794	10.1968	-10.94	3.56884e-27	2.85791e-26	50.6573
57134	MAN1C1	HMIC|MAN1A3|MAN1C|pp6318	-0.72	-1.6494	6.10084	-13.67	5.48255e-41	1.04966e-39	82.1652
2819	GPD1	GPD-C|GPDH-C|HTGTI	-0.72	-1.6503	5.9026	-16.69	3.71978e-59	2.83078e-57	123.694
35	ACADS	ACAD3|SCAD	-0.72	-1.65222	7.44852	-18.77	2.73823e-73	8.41513e-71	156.032
59307	SIGIRR	IL-1R8|TIR8	-0.73	-1.6537	7.44777	-17.27	5.8864e-63	6.08765e-61	132.388
189	AGXT	AGT|AGT1|AGXT1|PH1|SPAT|SPT|TLH6	-0.73	-1.65445	10.8716	-10.24	4.1602e-24	2.79813e-23	43.6776
23460	ABCA6	EST155051	-0.73	-1.65463	8.6529	-12.36	4.803e-34	5.97904e-33	66.3188
5199	CFP	BFD|PFC|PFD|PROPERDIN	-0.73	-1.65643	5.91551	-17.84	8.33542e-67	1.27669e-64	141.195
9719	ADAMTSL2	GPHYSD1	-0.74	-1.66514	5.48234	-17.25	8.48504e-63	8.70076e-61	132.025
912	CD1D	CD1A|R3|R3G1	-0.74	-1.66535	6.04709	-14.33	1.17771e-44	2.90229e-43	90.5435
2213	FCGR2B	CD32|CD32B|FCG2|FCGR2|IGFR2	-0.74	-1.66688	5.98856	-11.98	4.15686e-32	4.47093e-31	61.9005
3700	ITIH4	GP120|H4P|IHRP|ITI-HC4|ITIHL1|PK-120|PK120	-0.74	-1.66708	8.73283	-14.27	2.56197e-44	6.13857e-43	89.7724
10020	GNE	DMRV|GLCNE|IBM2|NM|Uae1	-0.74	-1.67094	9.42356	-15.87	6.9706e-54	3.55883e-52	111.635
1543	CYP1A1	AHH|AHRR|CP11|CYP1|CYPIA1|P1-450|P450-C|P450DX	-0.74	-1.67154	6.41893	-9.09	2.02079e-19	1.03084e-18	33.029
58510	PRODH2	HSPOX1|HYPDH	-0.74	-1.67168	8.36323	-13.25	1.06549e-38	1.75646e-37	76.9396
2875	GPT	AAT1|ALT1|GPT1	-0.74	-1.67319	7.01275	-17.24	9.97102e-63	1.01386e-60	131.865
4942	OAT	GACR|HOGA|OATASE|OKT	-0.75	-1.67683	9.42618	-10.27	3.10966e-24	2.09737e-23	43.9651
3426	CFI	AHUS3|ARMD13|C3BINA|C3b-INA|FI|IF|KAF	-0.75	-1.67842	11.1635	-14.8	1.95371e-47	6.03058e-46	96.8963
4329	ALDH6A1	MMSADHA|MMSDH	-0.75	-1.6813	9.41797	-13.68	5.2573e-41	1.00974e-39	82.2068
3556	IL1RAP	C3orf13|IL-1RAcP|IL1R3	-0.75	-1.68449	7.74554	-14.25	3.34859e-44	7.96031e-43	89.5067
4311	MME	CALLA|CD10|CMT2T|NEP|SCA43|SFE	-0.75	-1.68466	5.65323	-11.33	5.16986e-29	4.64749e-28	54.8465
28968	SLC6A16	NT5|NTT5	-0.75	-1.68476	5.8913	-18.65	1.99265e-72	5.24154e-70	154.059
249	ALPL	AP-TNAP|APTNAP|HOPS|TNAP|TNSALP	-0.75	-1.68536	6.16597	-15.53	8.32805e-52	3.5861e-50	106.886
6539	SLC6A12	BGT-1|BGT1|GAT2	-0.76	-1.6879	7.0509	-13.8	1.16871e-41	2.36873e-40	83.6982
325	APCS	HEL-S-92n|PTX2|SAP	-0.76	-1.69148	12.3062	-9.56	3.03666e-21	1.72586e-20	37.1685
8631	SKAP1	HEL-S-81p|SCAP1|SKAP55	-0.76	-1.69207	6.0787	-15.91	3.49614e-54	1.85541e-52	112.321
54762	GRAMD1C	-	-0.76	-1.69247	6.92388	-12.44	2.04176e-34	2.59237e-33	67.1663
66002	CYP4F12	CYPIVF12|F22329_1	-0.76	-1.69258	7.91183	-14.98	1.78062e-48	6.06916e-47	99.2738
2180	ACSL1	ACS1|FACL1|FACL2|LACS|LACS1|LACS2	-0.76	-1.69457	11.0936	-11.84	1.85522e-31	1.91537e-30	60.4193
8876	VNN1	HDLCQ8|Tiff66	-0.76	-1.69484	9.18337	-8.79	2.83962e-18	1.35647e-17	30.4255
5009	OTC	OCTD	-0.77	-1.69985	9.74369	-9.09	2.04312e-19	1.04179e-18	33.0182
3250	HPR	A-259H10.2|HP	-0.77	-1.69995	11.409	-9.93	8.51994e-23	5.32772e-22	40.6955
5446	PON3	-	-0.77	-1.70091	11.5883	-12.33	7.21685e-34	8.8117e-33	65.9154
26007	TKFC	DAK|NET45	-0.77	-1.70312	7.2838	-14.43	3.03528e-45	7.88131e-44	91.8889
6363	CCL19	CKb11|ELC|MIP-3b|MIP3B|SCYA19	-0.77	-1.70379	6.80704	-9.1	1.86718e-19	9.54092e-19	33.1069
64081	PBLD	HEL-S-306|MAWBP|MAWDBP	-0.78	-1.71369	8.96527	-14.22	4.96552e-44	1.16666e-42	89.1158
55268	ECHDC2	-	-0.78	-1.71416	10.8689	-17.83	9.65213e-67	1.44186e-64	141.049
4547	MTTP	ABL|MTP	-0.78	-1.7147	10.1243	-11.43	1.88616e-29	1.74218e-28	55.8443
283537	SLC46A3	FKSG16	-0.78	-1.71639	8.42631	-11.86	1.46414e-31	1.522e-30	60.6537
3294	HSD17B2	EDH17B2|HSD17|SDR9C2	-0.78	-1.71687	9.76474	-11.12	5.29623e-28	4.4627e-27	52.5444
1562	CYP2C18	CPCI|CYP2C|CYP2C17|P450-6B/29C|P450IIC17	-0.78	-1.71822	8.94109	-10.88	6.21411e-27	4.90161e-26	50.1089
10894	LYVE1	CRSBP-1|HAR|LYVE-1|XLKD1	-0.78	-1.72005	5.40322	-14.34	9.6418e-45	2.38093e-43	90.742
2639	GCDH	ACAD5|GCD	-0.78	-1.72155	7.75291	-17.01	3.04436e-61	2.72865e-59	128.468
2538	G6PC	G6PC1|G6PT|G6Pase|GSD1|GSD1a	-0.78	-1.72195	10.1315	-9.95	7.5233e-23	4.72158e-22	40.8183
3043	HBB	CD113t-C|beta-globin	-0.78	-1.72196	9.19331	-10.13	1.29901e-23	8.47145e-23	42.5529
23710	GABARAPL1	APG8-LIKE|APG8L|ATG8|ATG8B|ATG8L|GEC1	-0.79	-1.72415	8.98563	-16.6	1.4779e-58	1.06444e-56	122.324
64816	CYP3A43	-	-0.79	-1.72763	6.77171	-15.12	2.67671e-49	9.55403e-48	101.155
23498	HAAO	3-HAO|HAO	-0.79	-1.7294	7.05191	-15.98	1.33149e-54	7.42443e-53	113.279
25891	PAMR1	DKFZP586H2123|FP938|RAMP	-0.79	-1.72997	5.45266	-18.3	6.13612e-70	1.32584e-67	148.364
6822	SULT2A1	DHEA-ST|DHEAS|HST|ST2|ST2A1|ST2A3|STD|hSTa	-0.79	-1.73199	11.4724	-9.84	1.99648e-22	1.22378e-21	39.8548
64388	GREM2	CKTSF1B2|DAND3|PRDC|STHAG9	-0.79	-1.7328	5.70143	-13.94	1.83065e-42	3.94845e-41	85.5371
1573	CYP2J2	CPJ2|CYPIIJ2	-0.8	-1.7354	9.61516	-13.56	2.2635e-40	4.16871e-39	80.7589
2110	ETFDH	ETFQO|MADD	-0.8	-1.73561	8.60531	-15.52	9.46208e-52	4.05997e-50	106.759
1807	DPYS	DHP|DHPase	-0.8	-1.73597	11.1684	-10.98	2.24351e-27	1.81097e-26	51.1164
32	ACACB	ACC2|ACCB|HACC275	-0.8	-1.73693	7.8906	-17.34	2.20742e-63	2.47312e-61	133.363
10599	SLCO1B1	HBLRR|LST-1|LST1|OATP-C|OATP1B1|OATP2|OATPC|SLC21A6	-0.8	-1.74084	8.95367	-12.51	8.95145e-35	1.1659e-33	67.9833
22849	CPEB3	-	-0.8	-1.74315	6.38668	-18.45	5.39833e-71	1.25615e-68	150.78
978	CDA	CDD	-0.8	-1.74346	6.50696	-14.1	2.42007e-43	5.47343e-42	87.5444
25854	FAM149A	MST119|MSTP119	-0.81	-1.74897	6.75182	-17.21	1.58791e-62	1.58791e-60	131.402
1071	CETP	BPIFF|HDLCQ10	-0.81	-1.75037	5.45748	-15.57	4.7115e-52	2.06555e-50	107.451
929	CD14	-	-0.81	-1.75088	11.1567	-13.34	3.52637e-39	6.0182e-38	78.036
445	ASS1	ASS|CTLN1	-0.81	-1.75217	11.8449	-16.92	1.23128e-60	1.04919e-58	127.08
79831	KDM8	JMJD5	-0.81	-1.75542	5.6403	-19.75	2.51825e-80	1.45099e-77	172.139
6653	SORL1	C11orf32|LR11|LRP9|SORLA|SorLA-1|gp250	-0.81	-1.75559	9.05539	-16.75	1.73701e-59	1.35599e-57	124.45
55089	SLC38A4	ATA3|NAT3|PAAT|SNAT4	-0.81	-1.7573	10.0155	-10.23	4.9212e-24	3.30264e-23	43.5116
23316	CUX2	CDP2|CUTL2	-0.82	-1.76314	7.65268	-12.34	6.09119e-34	7.50543e-33	66.0834
51181	DCXR	DCR|HCR2|HCRII|KIDCR|P34H|PNTSU|SDR20C1|XR	-0.82	-1.76642	11.8281	-13.47	6.86777e-40	1.22747e-38	79.6582
123876	ACSM2A	A-923A4.1|ACSM2	-0.83	-1.77284	9.17842	-11.95	5.49845e-32	5.86178e-31	61.6235
10171	RCL1	RNAC|RPCL1	-0.83	-1.77802	7.76484	-16.89	1.88325e-60	1.59352e-58	126.657
3990	LIPC	HDLCQ12|HL|HTGL|LIPH	-0.84	-1.78444	8.91886	-13.73	2.77487e-41	5.4595e-40	82.8406
27141	CIDEB	-	-0.84	-1.78917	9.70596	-13.28	7.88454e-39	1.31048e-37	77.2382
9920	KBTBD11	KLHDC7C	-0.84	-1.79017	5.22915	-18.18	4.22217e-69	8.24003e-67	146.447
922	CD5L	AIM|API6|CT-2|PRO229|SP-ALPHA|Spalpha|hAIM	-0.85	-1.80302	6.34913	-12.91	7.50684e-37	1.09437e-35	72.7215
3273	HRG	HPRG|HRGP|THPH11	-0.86	-1.80882	11.6611	-9.64	1.32164e-21	7.72552e-21	37.9893
2646	GCKR	FGQTL5|GKRP	-0.86	-1.80909	7.35758	-17.36	1.55509e-63	1.77515e-61	133.711
33	ACADL	ACAD4|LCAD	-0.86	-1.81045	6.44656	-15.19	9.09925e-50	3.35674e-48	102.226
5340	PLG	-	-0.86	-1.81055	11.6009	-11.08	7.52581e-28	6.29318e-27	52.1969
10144	FAM13A	ARHGAP48|FAM13A1	-0.86	-1.81068	6.99108	-18.72	6.26027e-73	1.84754e-70	155.21
55576	STAB2	FEEL2|FELE-2|FELL2|FEX2|HARE|SCARH1	-0.86	-1.81961	5.04332	-20.05	1.35701e-82	1.26306e-79	177.332
3263	HPX	HX	-0.87	-1.82206	12.7405	-11.39	2.88484e-29	2.64244e-28	55.4238
64850	ETNPPL	AGXT2L1	-0.87	-1.83085	9.05566	-10.46	4.84316e-25	3.42503e-24	45.8026
8835	SOCS2	CIS2|Cish2|SOCS-2|SSI-2|SSI2|STATI2	-0.88	-1.84023	7.09998	-13.91	2.74379e-42	5.87609e-41	85.1357
760	CA2	CA-II|CAC|CAII|Car2|HEL-76|HEL-S-282	-0.88	-1.84109	9.28232	-12.42	2.50905e-34	3.16905e-33	66.9621
2328	FMO3	FMOII|TMAU|dJ127D3.1	-0.88	-1.84266	11.1488	-10.69	4.72429e-26	3.53956e-25	48.1031
732	C8B	C82	-0.88	-1.84648	10.8802	-12.55	5.44708e-35	7.17189e-34	68.4755
8529	CYP4F2	CPF2	-0.89	-1.85335	9.04708	-14.31	1.35834e-44	3.3137e-43	90.4019
2160	F11	FXI|PTA	-0.89	-1.85832	7.34401	-16.78	9.80543e-60	7.80564e-58	125.018
2053	EPHX2	CEH|SEH	-0.89	-1.85847	8.80763	-13.98	1.13344e-42	2.48453e-41	86.0127
3491	CYR61	CCN1|GIG1|IGFBP10	-0.9	-1.86208	8.293	-12.97	3.3191e-37	4.97659e-36	73.5305
56521	DNAJC12	HPANBH4|JDP1	-0.9	-1.87227	7.4281	-14.77	3.1133e-47	9.48889e-46	96.4338
10877	CFHR4	CFHL4|FHR-4|FHR4	-0.91	-1.87272	9.68523	-10.23	4.72503e-24	3.17275e-23	43.5518
78989	COLEC11	3MC2|CL-K1-I|CL-K1-II|CL-K1-IIa|CL-K1-IIb|CLK1	-0.91	-1.87788	8.3342	-13.48	6.30799e-40	1.13077e-38	79.7426
10246	SLC17A2	NPT3	-0.91	-1.87938	9.14758	-13.3	6.1784e-39	1.03115e-37	77.4799
2920	CXCL2	CINC-2a|GRO2|GROb|MGSA-b|MIP-2a|MIP2|MIP2A|SCYB2	-0.91	-1.87947	8.49473	-13.8	1.17491e-41	2.37732e-40	83.693
563	AZGP1	ZA2G|ZAG	-0.91	-1.88135	11.4332	-13.97	1.28957e-42	2.81149e-41	85.8846
5166	PDK4	-	-0.91	-1.88386	7.81917	-13.14	4.4635e-38	7.05992e-37	75.5194
316	AOX1	AO|AOH1	-0.92	-1.89108	10.5411	-11.28	8.92337e-29	7.86973e-28	54.3064
4239	MFAP4	-	-0.92	-1.89182	5.54945	-14.95	2.71632e-48	9.02952e-47	98.8546
5858	PZP	CPAMD6	-0.92	-1.89326	5.9815	-12.65	1.64288e-35	2.2462e-34	69.6632
55240	STEAP3	AHMIO2|STMP3|TSAP6|dudlin-2|dudulin-2|pHyde	-0.92	-1.89333	7.58999	-18.19	3.46793e-69	6.87901e-67	146.643
6999	TDO2	TDO|TO|TPH2|TRPO	-0.93	-1.90264	9.82523	-11.9	9.9219e-32	1.04034e-30	61.039
56944	OLFML3	HNOEL-iso|OLF44	-0.93	-1.90285	6.56445	-15.46	2.23312e-51	9.38219e-50	105.907
55076	TMEM45A	DERP7|DNAPTP4	-0.93	-1.90506	8.3249	-12.13	6.84894e-33	7.87758e-32	63.6864
2027	ENO3	GSD13|MSE	-0.94	-1.91226	6.74987	-15.13	2.28401e-49	8.22516e-48	101.312
54363	HAO1	GOX|GOX1|HAOX1	-0.94	-1.91401	10.0159	-12.77	4.15676e-36	5.80794e-35	71.0252
6462	SHBG	ABP|SBP|TEBG	-0.94	-1.91794	6.41488	-14.46	1.93381e-45	5.10897e-44	92.3362
4018	LPA	AK38|APOA|LP	-0.94	-1.91928	8.6006	-14.33	1.18508e-44	2.91453e-43	90.5373
1557	CYP2C19	CPCJ|CYP2C|CYPIIC17|CYPIIC19|P450C2C|P450IIC19	-0.95	-1.9255	6.20671	-14.32	1.33778e-44	3.27012e-43	90.4171
1805	DPT	TRAMP	-0.95	-1.93241	5.74329	-16.08	3.12588e-55	1.83608e-53	114.718
22977	AKR7A3	AFAR2	-0.95	-1.93565	8.95352	-14.63	2.07124e-46	5.86932e-45	94.5531
5444	PON1	ESA|MVCD5|PON	-0.95	-1.93818	9.51321	-13.2	2.19594e-38	3.557e-37	76.2226
2220	FCN2	EBP-37|FCNL|P35|ficolin-2	-0.96	-1.9422	5.28033	-20.66	3.7165e-87	7.49495e-84	187.778
3479	IGF1	IGF-I|IGFI|MGF	-0.96	-1.94697	6.97813	-14.76	3.61797e-47	1.0836e-45	96.2847
366	AQP9	AQP-9|HsT17287|SSC1|T17287	-0.96	-1.94907	10.8949	-11.06	9.27825e-28	7.68951e-27	51.9898
51316	PLAC8	C15|DGIC|PNAS-144|onzin	-0.96	-1.94991	5.85699	-13.56	2.35987e-40	4.33299e-39	80.7176
1491	CTH	-	-0.97	-1.95513	8.45672	-13.04	1.46205e-37	2.23652e-36	74.3432
5267	SERPINA4	KAL|KLST|KST|PI-4|PI4|kallistatin	-0.97	-1.96535	8.87226	-14.77	3.13255e-47	9.52357e-46	96.4277
124	ADH1A	ADH1	-0.98	-1.9686	12.5946	-11.68	1.11765e-30	1.10577e-29	58.6414
4143	MAT1A	MAT|MATA1|SAMS|SAMS1	-0.98	-1.97269	10.9465	-16.01	8.21942e-55	4.62581e-53	113.758
1373	CPS1	CPSASE1|PHN	-0.98	-1.97643	12.3213	-10.03	3.44009e-23	2.19657e-22	41.591
2642	GCGR	GGR|GL-R	-0.99	-1.98458	6.92293	-16.38	3.75659e-57	2.51131e-55	119.11
56892	TCIM	C8orf4|TC-1|TC1	-0.99	-1.98767	8.80131	-15.59	3.63629e-52	1.6296e-50	107.709
130	ADH6	ADH-5	-0.99	-1.99144	9.24948	-14.71	6.66059e-47	1.96569e-45	95.679
54988	ACSM5	-	-1	-1.99695	7.79987	-14.82	1.51698e-47	4.73078e-46	97.1474
284541	CYP4A22	-	-1	-1.99833	7.67521	-13.88	4.17077e-42	8.77676e-41	84.7203
10332	CLEC4M	CD209L|CD299|DC-SIGN2|DC-SIGNR|DCSIGNR|HP10347|L-SIGN|LSIGN	-1.01	-2.01393	5.37908	-16.06	4.45464e-55	2.579e-53	114.367
3512	JCHAIN	IGCJ|IGJ|JCH	-1.02	-2.02708	7.26907	-9.9	1.139e-22	7.07851e-22	40.4089
6296	ACSM3	SA|SAH	-1.03	-2.03986	6.8633	-16.73	2.02669e-59	1.56197e-57	124.297
2954	GSTZ1	GSTZ1-1|MAAI|MAAID|MAI	-1.03	-2.04035	7.40052	-17.5	1.81428e-64	2.26318e-62	135.846
390	RND3	ARHE|Rho8|RhoE|memB	-1.04	-2.05148	9.22736	-17.17	2.99357e-62	2.87478e-60	130.772
3486	IGFBP3	BP-53|IBP3	-1.05	-2.06712	10.069	-16.78	9.5658e-60	7.66531e-58	125.043
1634	DCN	CSCD|DSPG2|PG40|PGII|PGS2|SLRR1B	-1.05	-2.06906	7.90552	-14.88	7.1188e-48	2.26678e-46	97.8983
10841	FTCD	LCHC1	-1.06	-2.09025	8.95073	-15.96	1.86389e-54	1.0205e-52	112.945
10351	ABCA8	-	-1.08	-2.10953	7.13791	-16.35	5.9295e-57	3.89929e-55	118.656
1555	CYP2B6	CPB6|CYP2B|CYP2B7|CYP2B7P|CYPIIB6|EFVM|IIB1|P450	-1.08	-2.11067	7.8518	-14.54	7.03737e-46	1.94411e-44	93.3393
3397	ID1	ID|bHLHb24	-1.08	-2.11653	8.02726	-15.39	6.37182e-51	2.56997e-49	104.866
635	BHMT	BHMT1|HEL-S-61p	-1.08	-2.12008	10.3181	-12.13	7.04028e-33	8.07464e-32	63.6591
1558	CYP2C8	CPC8|CYPIIC8|MP-12/MP-20	-1.09	-2.12211	9.39758	-13.94	1.81955e-42	3.93152e-41	85.5431
4153	MBL2	COLEC1|HSMBPC|MBL|MBL2D|MBP|MBP-C|MBP1|MBPD	-1.09	-2.12366	9.70412	-12.56	4.74256e-35	6.29221e-34	68.6127
1592	CYP26A1	CP26|CYP26|P450RAI|P450RAI1	-1.1	-2.14363	5.35213	-15.42	3.72406e-51	1.53792e-49	105.399
27232	GNMT	HEL-S-182mP	-1.11	-2.16258	8.47281	-11.78	3.58968e-31	3.66542e-30	59.7658
8858	PROZ	PZ	-1.12	-2.17304	6.79456	-16.19	6.61183e-56	4.06107e-54	116.261
55753	OGDHL	-	-1.13	-2.18743	8.03429	-16.3	1.24929e-56	7.99811e-55	117.916
10998	SLC27A5	ACSB|ACSVL6|BACS|BAL|FACVL3|FATP-5|FATP5|VLACSR|VLCS-H2|VLCSH2	-1.13	-2.19429	8.95913	-15.69	8.06528e-53	3.84212e-51	109.204
1579	CYP4A11	CP4Y|CYP4A2|CYP4AII	-1.13	-2.19569	10.0584	-13.87	4.56918e-42	9.59846e-41	84.6298
4502	MT2A	MT-2|MT-II|MT2	-1.15	-2.22544	12.6433	-16.01	8.27539e-55	4.63575e-53	113.752
3290	HSD11B1	11-DH|11-beta-HSD1|CORTRD2|HDL|HSD11|HSD11B|HSD11L|SDR26C1	-1.16	-2.24139	10.2403	-10.61	1.04345e-25	7.65196e-25	47.3198
1958	EGR1	AT225|G0S30|KROX-24|NGFI-A|TIS8|ZIF-268|ZNF225	-1.18	-2.26037	9.02605	-17.17	2.72751e-62	2.64023e-60	130.865
10164	CHST4	GST3|GlcNAc6ST2|HECGLCNAC6ST|LSST	-1.19	-2.27558	5.72043	-19.02	4.55517e-75	1.67023e-72	160.104
2203	FBP1	FBP	-1.19	-2.28519	10.468	-15.47	1.97708e-51	8.33543e-50	106.027
1559	CYP2C9	CPC9|CYP2C|CYP2C10|CYPIIC9|P450IIC9	-1.19	-2.28531	9.96408	-14.55	5.99846e-46	1.66471e-44	93.4978
54825	CDHR2	PCDH24|PCLKC	-1.21	-2.30563	6.93926	-20.26	3.66654e-84	4.92946e-81	180.923
27165	GLS2	GA|GLS|LGA|hLGA	-1.21	-2.31306	7.0586	-14.52	9.02816e-46	2.46593e-44	93.0921
6694	SPP2	SPP-24|SPP24	-1.23	-2.33804	9.88344	-11.94	6.22627e-32	6.61439e-31	61.5004
3818	KLKB1	KLK3|PKK|PKKD|PPK	-1.23	-2.34323	9.75447	-17.98	9.2549e-68	1.57724e-65	143.379
4061	LY6E	RIG-E|RIGE|SCA-2|SCA2|TSA-1	-1.23	-2.34907	8.41607	-16.08	3.07089e-55	1.81257e-53	114.736
64577	ALDH8A1	ALDH12|DJ352A20.2	-1.24	-2.36321	9.7457	-17.06	1.40605e-61	1.31885e-59	129.235
8406	SRPX	DRS|ETX1|HEL-S-83p|SRPX1	-1.25	-2.38487	6.43048	-16.08	3.3896e-55	1.98136e-53	114.638
4837	NNMT	-	-1.26	-2.39454	10.302	-13.99	8.93108e-43	1.96842e-41	86.2491
11199	ANXA10	ANX14	-1.26	-2.3971	8.07242	-16.33	8.32111e-57	5.4132e-55	118.32
8685	MARCO	SCARA2|SR-A6	-1.26	-2.39732	5.92433	-17.28	4.95701e-63	5.21564e-61	132.559
731	C8A	-	-1.26	-2.39851	10.9524	-16.02	7.3967e-55	4.2217e-53	113.863
729	C6	-	-1.26	-2.40209	10.9857	-14.49	1.37435e-45	3.67914e-44	92.6751
5348	FXYD1	PLM	-1.28	-2.42007	7.7891	-15.9	4.2787e-54	2.24122e-52	112.12
6898	TAT	-	-1.28	-2.4221	8.48607	-14.5	1.10722e-45	2.99717e-44	92.8896
6387	CXCL12	IRH|PBSF|SCYB12|SDF1|TLSF|TPAR1	-1.28	-2.42247	8.09939	-16.11	1.95787e-55	1.17279e-53	115.183
6554	SLC10A1	NTCP	-1.28	-2.4349	10.373	-12.29	1.1189e-33	1.35658e-32	65.481
4493	MT1E	MT-1E|MT-IE|MT1|MTD	-1.3	-2.45804	10.4661	-16.95	8.57535e-61	7.41155e-59	127.439
3483	IGFALS	ACLSD|ALS	-1.3	-2.46499	6.52272	-20.21	9.46098e-84	1.14478e-80	179.98
2998	GYS2	-	-1.31	-2.47534	8.08895	-14.22	4.61546e-44	1.08652e-42	89.1883
2354	FOSB	AP-1|G0S3|GOS3|GOSB	-1.31	-2.47664	6.7342	-15.01	1.14014e-48	3.91922e-47	99.7163
2690	GHR	GHBP|GHIP	-1.31	-2.47692	9.89118	-16.52	4.99964e-58	3.49686e-56	121.113
3781	KCNN2	KCa2.2|SK2|SKCA2|SKCa 2|hSK2	-1.31	-2.47926	5.40768	-17.99	7.74201e-68	1.35766e-65	143.556
590	BCHE	CHE1|CHE2|E1	-1.33	-2.50571	8.97366	-14.88	7.28893e-48	2.31486e-46	97.8749
1893	ECM1	URBWD	-1.33	-2.51396	6.40357	-22.18	5.72254e-99	3.46214e-95	214.828
1776	DNASE1L3	DHP2|DNAS1L3|LSD|SLEB16	-1.33	-2.51924	7.73334	-17.57	5.63292e-65	7.40852e-63	137.008
8564	KMO	dJ317G22.1	-1.34	-2.52317	7.79605	-17.75	3.46594e-66	4.9926e-64	139.778
9547	CXCL14	BMAC|BRAK|KEC|KS1|MIP-2g|MIP2G|NJAC|SCYB14	-1.36	-2.56307	5.84844	-20.55	2.76092e-86	4.17589e-83	185.784
3242	HPD	4-HPPD|4HPPD|GLOD3|HPPDASE|PPD	-1.36	-2.56732	11.2454	-12.13	7.04701e-33	8.0747e-32	63.6582
1571	CYP2E1	CPE1|CYP2E|P450-J|P450C2E	-1.37	-2.58775	11.0938	-13.31	5.06114e-39	8.52922e-38	77.6777
126	ADH1C	ADH3	-1.38	-2.59572	11.5446	-13.95	1.68812e-42	3.65407e-41	85.6175
3950	LECT2	chm-II|chm2	-1.38	-2.60224	10.7954	-13.86	4.82704e-42	1.01226e-40	84.5753
730	C7	-	-1.38	-2.60277	7.94085	-14.11	2.03075e-43	4.61014e-42	87.7184
6718	AKR1D1	3o5bred|CBAS2|SRD5B1	-1.38	-2.60797	10.1473	-14.53	7.63208e-46	2.1036e-44	93.2588
173	AFM	ALB2|ALBA|ALF	-1.39	-2.61864	10.5468	-14.96	2.37977e-48	7.97653e-47	98.9859
1393	CRHBP	CRF-BP|CRFBP	-1.39	-2.62272	5.82076	-17.56	6.46441e-65	8.32121e-63	136.871
7433	VIPR1	HVR1|II|PACAP-R-2|PACAP-R2|RDC1|V1RG|VAPC1|VIP-R-1|VIPR|VIRG|VPAC1|VPAC1R|VPCAP1R	-1.39	-2.62292	5.96787	-23.19	4.00554e-107	4.8467e-103	233.506
8608	RDH16	RODH-4|SDR9C8	-1.42	-2.6814	9.76651	-15.91	3.8132e-54	2.01483e-52	112.234
10993	SDS	SDH	-1.43	-2.69164	8.76027	-13.3	5.86111e-39	9.80905e-38	77.5322
10249	GLYAT	ACGNAT|CAT|GAT	-1.43	-2.69189	7.85057	-16.02	8.07484e-55	4.56568e-53	113.776
51179	HAO2	GIG16|HAOX2	-1.45	-2.72678	7.86115	-15.06	5.48737e-49	1.90796e-47	100.442
51302	CYP39A1	-	-1.45	-2.72986	6.86713	-18.98	9.9855e-75	3.55366e-72	159.324
4496	MT1H	MT-0|MT-1H|MT-IH|MT1	-1.46	-2.75276	9.87126	-17.69	8.76354e-66	1.17821e-63	138.857
2158	F9	F9 p22|FIX|HEMB|P19|PTC|THPH8	-1.46	-2.75801	11.1356	-15.4	5.09242e-51	2.07469e-49	105.088
4501	MT1X	MT-1l|MT1	-1.47	-2.77021	11.6182	-16.57	2.21473e-58	1.5857e-56	121.922
8424	BBOX1	BBH|BBOX|G-BBH|gamma-BBH	-1.47	-2.77886	7.31408	-16.53	4.6037e-58	3.25759e-56	121.195
4495	MT1G	MT1|MT1K	-1.51	-2.84527	9.00456	-18.2	2.85306e-69	5.75367e-67	146.837
6716	SRD5A2	-	-1.51	-2.8475	6.66503	-20.07	1.07107e-82	1.08e-79	177.567
5105	PCK1	PEPCK-C|PEPCK1|PEPCKC	-1.52	-2.86447	10.906	-15.9	4.49756e-54	2.34571e-52	112.07
57733	GBA3	CBG|CBGL1|GLUC|KLRP	-1.52	-2.87386	8.42909	-16.66	5.92166e-59	4.39583e-57	123.232
3083	HGFAC	HGFA	-1.55	-2.92153	7.92536	-18.02	5.41935e-68	9.64325e-66	143.911
125	ADH1B	ADH2|HEL-S-117	-1.57	-2.96809	10.3929	-17.98	8.95473e-68	1.54789e-65	143.412
1576	CYP3A4	CP33|CP34|CYP3A|CYP3A3|CYPIIIA3|CYPIIIA4|HLP|NF-25|P450C3|P450PCN1	-1.58	-2.98964	9.41052	-17.19	2.1335e-62	2.09881e-60	131.109
2353	FOS	AP-1|C-FOS|p55	-1.62	-3.06378	8.27804	-17.2	1.77974e-62	1.76515e-60	131.289
51266	CLEC1B	1810061I13Rik|CLEC2|CLEC2B|PRO1384|QDED721	-1.75	-3.35242	5.94796	-20.59	1.33137e-86	2.30137e-83	186.509
6580	SLC22A1	HOCT1|OCT1|oct1_cds	-1.82	-3.52543	9.58167	-15.76	3.12051e-53	1.51639e-51	110.147
10	NAT2	AAC2|NAT-2|PNAT	-1.87	-3.66793	7.38771	-20.04	1.8704e-82	1.61656e-79	177.013
4494	MT1F	MT1	-1.89	-3.69932	10.282	-18.84	9.45896e-74	3.01193e-71	157.089
735	C9	ARMD15|C9D	-1.92	-3.79251	10.041	-15.23	5.35904e-50	2.0138e-48	102.751
4499	MT1M	MT-1M|MT-IM|MT1|MT1K	-1.93	-3.80166	7.71224	-16.72	2.69592e-59	2.0646e-57	124.014
28234	SLCO1B3	HBLRR|LST-2|LST-3TM13|LST3|OATP-8|OATP1B3|OATP8|SLC21A8	-1.93	-3.80216	8.36371	-17.42	5.80722e-64	6.69213e-62	134.69
319	APOF	Apo-F|LTIP	-1.93	-3.81741	8.75018	-19.8	1.04929e-80	7.05356e-78	173.009
8547	FCN3	FCNH|HAKA1	-1.98	-3.9518	8.11085	-20.12	4.5476e-83	5.00236e-80	178.419
57817	HAMP	HEPC|HFE2B|LEAP1|PLTR	-2.48	-5.5717	9.75289	-18.28	7.43883e-70	1.55189e-67	148.173
1544	CYP1A2	CP12|CYPIA2|P3-450|P450(PA)	-2.49	-5.63689	8.90824	-21.29	6.11022e-92	2.00965e-88	198.733
