# Supplementary material for: Discovering master regulators in hepatocellular carcinoma: one novel MR, SEC14L2 inhibits cancer cells
Source: Aging (Albany NY). 2019 Dec 18;11(24):12375–411. doi: 10.18632/aging.102579 (PMC6949064; doi:10.18632/aging.102579)
Supplement: Supplementary Table 4 [file aging-11-102579-s005..xlsx]

## Sheet: subtype_1
Regulon	Universe.Size	Regulon.Size	Total.Hits	Expected.Hits	Observed.Hits	Pvalue	Adjusted.Pvalue
ESR1	12100	172	483	6.87	105	6.6e-105	6.6e-102
PTTG1	12100	128	483	5.11	76	5.2e-74	2.6e-71
HLF	12100	172	483	6.87	77	2.3e-62	7.7e-60
NR1I2	12100	187	483	7.46	75	2.3e-56	5.7e-54
TRIM16	12100	116	483	4.63	46	2.2e-34	4.4e-32
DDB2	12100	178	483	7.11	50	4.8e-29	8.1e-27
AR	12100	120	483	4.79	42	7.4e-29	1.1e-26
NCOR1	12100	104	483	4.15	38	5.3e-27	6.7e-25
DACH1	12100	75	483	2.99	33	1e-26	1.1e-24
E2F8	12100	69	483	2.75	29	6.4e-23	6.4e-21
PHF10	12100	156	483	6.23	40	8.7e-22	7.9e-20
PCBD1	12100	223	483	8.9	45	7.6e-20	6.3e-18
FOXM1	12100	57	483	2.28	23	6e-18	4.7e-16
KLF11	12100	47	483	1.88	21	1.3e-17	9.4e-16
NOTCH3	12100	143	483	5.71	32	8.6e-16	5.7e-14
SNAPC5	12100	119	483	4.75	29	1.8e-15	1.1e-13
RFX5	12100	149	483	5.95	32	3e-15	1.8e-13
PLAG1	12100	44	483	1.76	18	1.9e-14	1.1e-12
EZH2	12100	106	483	4.23	26	4.5e-14	2.3e-12
NME2	12100	66	483	2.63	21	4.6e-14	2.3e-12
MCM4	12100	36	483	1.44	16	1.1e-13	5.4e-12
NR3C2	12100	103	483	4.11	25	1.8e-13	8.2e-12
FOS	12100	22	483	0.88	13	2e-13	8.3e-12
DIP2C	12100	63	483	2.51	20	2e-13	8.3e-12
SIRT3	12100	106	483	4.23	25	3.7e-13	1.5e-11
ZNF623	12100	69	483	2.75	19	1.4e-11	5.2e-10
SIRT5	12100	116	483	4.63	24	2.2e-11	7.8e-10
SMAD6	12100	48	483	1.92	16	2.3e-11	7.8e-10
NR1I3	12100	48	483	1.92	16	2.3e-11	7.8e-10
SALL1	12100	120	483	4.79	24	4.7e-11	1.6e-09
PPARGC1A	12100	77	483	3.07	19	1.1e-10	3.6e-09
SSX1	12100	31	483	1.24	12	1e-09	3.2e-08
HMGN4	12100	185	483	7.38	27	4.8e-09	1.5e-07
LEF1	12100	77	483	3.07	17	6.7e-09	2e-07
SUB1	12100	230	483	9.18	30	9.9e-09	2.8e-07
SEC14L2	12100	71	483	2.83	16	1.4e-08	3.8e-07
LHX2	12100	33	483	1.32	11	3.2e-08	8.6e-07
TCF21	12100	21	483	0.84	9	4.6e-08	1.2e-06
TRIM31	12100	29	483	1.16	10	9.5e-08	2.4e-06
SATB2	12100	47	483	1.88	12	2.1e-07	5.2e-06
MAF	12100	57	483	2.28	13	2.7e-07	6.5e-06
NFIL3	12100	48	483	1.92	12	2.7e-07	6.5e-06
PBX1	12100	102	483	4.07	17	5.2e-07	1.2e-05
MCM6	12100	21	483	0.84	8	7.8e-07	1.8e-05
IRF8	12100	44	483	1.76	11	8.5e-07	1.9e-05
SMARCA1	12100	121	483	4.83	18	1.4e-06	3e-05
TCF4	12100	204	483	8.14	24	2e-06	4.3e-05
ETV3	12100	31	483	1.24	9	2.2e-06	4.5e-05
GATA4	12100	48	483	1.92	11	2.2e-06	4.5e-05
NR0B2	12100	18	483	0.72	7	3.4e-06	6.7e-05
ZNF34	12100	26	483	1.04	8	5e-06	9.9e-05
BRCA2	12100	20	483	0.8	7	7.6e-06	0.00015
ASB9	12100	28	483	1.12	8	9.3e-06	0.00018
MCM7	12100	21	483	0.84	7	1.1e-05	0.0002
SS18L1	12100	84	483	3.35	13	2.6e-05	0.00047
SMARCA2	12100	98	483	3.91	14	3.2e-05	0.00058
NPM1	12100	42	483	1.68	9	3.3e-05	0.00058
NR1H3	12100	101	483	4.03	14	4.6e-05	0.00079
HTATIP2	12100	109	483	4.35	14	0.00011	0.0018
ID1	12100	29	483	1.16	7	0.00011	0.0019
CNOT6	12100	84	483	3.35	12	0.00012	0.0019
TCEA2	12100	74	483	2.95	11	0.00016	0.0025
SLC2A4RG	12100	101	483	4.03	13	0.00018	0.0029
PHF21A	12100	16	483	0.64	5	0.0003	0.0047
ZNF557	12100	18	483	0.72	5	0.00055	0.0085
TULP3	12100	48	483	1.92	8	0.00056	0.0085
POLR3B	12100	115	483	4.59	13	0.00066	0.0099
PTMA	12100	50	483	2	8	0.00075	0.011
TOB1	12100	39	483	1.56	7	0.00078	0.011
ZFPM2	12100	89	483	3.55	11	0.0008	0.011
NR2F1	12100	51	483	2.04	8	0.00085	0.012
CTNNBL1	12100	134	483	5.35	14	0.00092	0.013
POGK	12100	40	483	1.6	7	0.00092	0.013
MEF2D	12100	91	483	3.63	11	0.00097	0.013
CBX6	12100	52	483	2.08	8	0.00097	0.013
LIMD1	12100	41	483	1.64	7	0.0011	0.014
SOX9	12100	67	483	2.67	9	0.0013	0.017
ARID3A	12100	43	483	1.72	7	0.0014	0.018
MSC	12100	22	483	0.88	5	0.0015	0.019
ESRRG	12100	69	483	2.75	9	0.0016	0.02
ARNT2	12100	58	483	2.32	8	0.002	0.025
PHF14	12100	24	483	0.96	5	0.0022	0.027
HEY1	12100	60	483	2.4	8	0.0025	0.03
WDHD1	12100	61	483	2.43	8	0.0028	0.033
SREBF1	12100	37	483	1.48	6	0.0032	0.037
ZNF7	12100	27	483	1.08	5	0.0039	0.045
MXD3	12100	27	483	1.08	5	0.0039	0.045
TRIP13	12100	39	483	1.56	6	0.0042	0.048

## Sheet: subtype_2
Regulon	Universe.Size	Regulon.Size	Total.Hits	Expected.Hits	Observed.Hits	Pvalue	Adjusted.Pvalue
NR1I3	12100	208	483	8.3	76	1.5e-53	1.7e-50
AR	12100	143	483	5.71	63	2.1e-50	1.2e-47
PRDM4	12100	138	483	5.51	46	1.9e-30	7.2e-28
PTTG1	12100	55	483	2.2	31	1.7e-29	4.8e-27
SEC14L2	12100	150	483	5.99	44	1.6e-26	3.6e-24
TRIP13	12100	145	483	5.79	42	4.1e-25	7.7e-23
GTF3C2	12100	76	483	3.03	31	6.1e-24	9.8e-22
NR1H4	12100	270	483	10.78	54	1.9e-23	2.6e-21
KLF11	12100	114	483	4.55	36	4.2e-23	5.2e-21
KLF9	12100	106	483	4.23	34	3.9e-22	4.4e-20
NR0B2	12100	130	483	5.19	36	6.1e-21	6.2e-19
NR1I2	12100	106	483	4.23	32	5.4e-20	5e-18
PPARGC1A	12100	86	483	3.43	26	1.7e-16	1.5e-14
BCL11A	12100	127	483	5.07	30	1.5e-15	1.2e-13
MCM2	12100	73	483	2.91	23	3.6e-15	2.7e-13
RORC	12100	146	483	5.83	31	1.2e-14	8.1e-13
HDAC2	12100	66	483	2.63	21	4.6e-14	3e-12
PCGF2	12100	80	483	3.19	22	3.3e-13	2.1e-11
MLXIPL	12100	306	483	12.21	43	4.2e-13	2.5e-11
RNPS1	12100	102	483	4.07	24	1.2e-12	6.5e-11
HOXA5	12100	32	483	1.28	14	5.3e-12	2.8e-10
LDB2	12100	75	483	2.99	20	7.5e-12	3.8e-10
ELF4	12100	281	483	11.22	39	8.1e-12	4e-10
HLF	12100	84	483	3.35	21	8.7e-12	4.1e-10
TEAD4	12100	69	483	2.75	18	1.3e-10	5.7e-09
FOXM1	12100	72	483	2.87	18	2.7e-10	1.2e-08
TTF2	12100	46	483	1.84	14	1.6e-09	6.7e-08
PHF21A	12100	90	483	3.59	19	1.9e-09	7.7e-08
ZBTB16	12100	29	483	1.16	11	6.6e-09	2.5e-07
HMGA1	12100	23	483	0.92	10	6.7e-09	2.5e-07
NR3C2	12100	51	483	2.04	14	7.2e-09	2.6e-07
TCF12	12100	69	483	2.75	16	8.8e-09	3.1e-07
SOX4	12100	111	483	4.43	20	1.3e-08	4.5e-07
TFAP2A	12100	103	483	4.11	19	2e-08	6.7e-07
HMGB2	12100	55	483	2.2	14	2.1e-08	6.7e-07
EZH2	12100	56	483	2.24	14	2.7e-08	8.1e-07
TCEA2	12100	56	483	2.24	14	2.7e-08	8.1e-07
NFE2L3	12100	105	483	4.19	19	2.8e-08	8.1e-07
E2F8	12100	26	483	1.04	10	2.8e-08	8.1e-07
ARID3A	12100	182	483	7.26	25	6.2e-08	1.7e-06
XRCC6	12100	44	483	1.76	12	9.4e-08	2.6e-06
MCM6	12100	24	483	0.96	9	1.8e-07	4.9e-06
NFIC	12100	100	483	3.99	17	3.9e-07	1e-05
TSHZ2	12100	38	483	1.52	10	1.6e-06	4.1e-05
E2F3	12100	40	483	1.6	10	2.7e-06	6.7e-05
RORA	12100	51	483	2.04	11	4.1e-06	0.0001
ETV4	12100	35	483	1.4	9	6.7e-06	0.00016
KLF5	12100	86	483	3.43	14	7e-06	0.00016
SMAD6	12100	40	483	1.6	9	2.2e-05	0.00049
TOB1	12100	86	483	3.43	13	3.4e-05	0.00075
PARP1	12100	55	483	2.2	10	5.4e-05	0.0012
ZNF124	12100	19	483	0.76	6	6.8e-05	0.0015
BARD1	12100	28	483	1.12	7	8.8e-05	0.0019
CEBPD	12100	32	483	1.28	7	0.00022	0.0045
SALL1	12100	149	483	5.95	16	0.0003	0.0061
MEOX2	12100	34	483	1.36	7	0.00033	0.0065
HDGF	12100	45	483	1.8	8	0.00036	0.007
ELF3	12100	109	483	4.35	13	0.00039	0.0076
BRCA1	12100	71	483	2.83	10	0.00048	0.0092
SMARCD1	12100	99	483	3.95	12	0.00056	0.01
ESR1	12100	49	483	1.96	8	0.00065	0.012
IVNS1ABP	12100	28	483	1.12	6	0.0007	0.013
TFEB	12100	29	483	1.16	6	0.00085	0.015
TSC22D3	12100	31	483	1.24	6	0.0012	0.022
POLR3C	12100	43	483	1.72	7	0.0014	0.025
POLR2D	12100	69	483	2.75	9	0.0016	0.027
ENO1	12100	160	483	6.39	15	0.0018	0.031
AEBP1	12100	177	483	7.07	16	0.0019	0.032
HDAC1	12100	58	483	2.32	8	0.002	0.033
CREG1	12100	178	483	7.11	16	0.002	0.033
TRIM24	12100	46	483	1.84	7	0.0021	0.034
TFCP2L1	12100	35	483	1.4	6	0.0024	0.037
PITX1	12100	47	483	1.88	7	0.0024	0.037
SCML1	12100	90	483	3.59	10	0.0031	0.046
MYB	12100	37	483	1.48	6	0.0032	0.048

## Sheet: subtype_3
Regulon	Universe.Size	Regulon.Size	Total.Hits	Expected.Hits	Observed.Hits	Pvalue	Adjusted.Pvalue
PTTG1	12100	81	483	3.23	45	5.2e-42	5.9e-39
NR1I3	12100	101	483	4.03	39	9.3e-29	5.3e-26
ESR1	12100	51	483	2.04	29	8.2e-28	3.1e-25
NR1I2	12100	132	483	5.27	39	9.6e-24	2.7e-21
MCM2	12100	127	483	5.07	35	2.6e-20	5.9e-18
NR0B2	12100	141	483	5.63	35	1.1e-18	2e-16
HMGB2	12100	48	483	1.92	20	4.3e-16	6.9e-14
TBC1D2B	12100	139	483	5.55	30	2e-14	2.8e-12
SEC14L2	12100	96	483	3.83	25	3.1e-14	4e-12
TCEA2	12100	133	483	5.31	28	2.9e-13	3.3e-11
HMGA1	12100	111	483	4.43	25	1.1e-12	1.2e-10
PARP1	12100	98	483	3.91	22	2.8e-11	2.6e-09
TBX3	12100	236	483	9.42	34	6.6e-11	5.8e-09
ID1	12100	34	483	1.36	13	2.4e-10	2e-08
CEBPB	12100	41	483	1.64	13	3.5e-09	2.7e-07
LDB2	12100	104	483	4.15	20	4.1e-09	2.9e-07
SMAD6	12100	50	483	2	14	5.4e-09	3.6e-07
NR3C2	12100	79	483	3.15	17	1e-08	6.4e-07
FOXM1	12100	24	483	0.96	10	1.1e-08	6.7e-07
ETS2	12100	102	483	4.07	19	1.7e-08	9.8e-07
RBBP7	12100	68	483	2.71	15	5.3e-08	2.9e-06
NFE2L3	12100	54	483	2.16	13	1.4e-07	7.1e-06
HLF	12100	184	483	7.34	24	3e-07	1.5e-05
MAFB	12100	102	483	4.07	17	5.2e-07	2.4e-05
MXD3	12100	60	483	2.4	13	5.2e-07	2.4e-05
GTF2IRD1	12100	35	483	1.4	10	7e-07	3.1e-05
MAFG	12100	84	483	3.35	15	9.8e-07	4e-05
PPARGC1A	12100	84	483	3.35	15	9.8e-07	4e-05
SIRT7	12100	73	483	2.91	13	5.4e-06	0.00021
STAT3	12100	108	483	4.31	16	5.6e-06	0.00021
SNAI2	12100	86	483	3.43	14	7e-06	0.00026
POGK	12100	87	483	3.47	14	8e-06	0.00029
SIRT5	12100	76	483	3.03	13	8.5e-06	0.00029
MCM4	12100	37	483	1.48	9	1.1e-05	0.00037
ELF3	12100	78	483	3.11	13	1.1e-05	0.00037
AEBP1	12100	154	483	6.15	19	1.2e-05	0.00037
EPAS1	12100	150	483	5.99	18	2.9e-05	0.00088
LEF1	12100	73	483	2.91	12	2.9e-05	0.00088
TLE2	12100	53	483	2.12	10	3.9e-05	0.0011
ENO1	12100	140	483	5.59	17	4.2e-05	0.0012
TRIP13	12100	34	483	1.36	8	4.4e-05	0.0012
RORC	12100	101	483	4.03	14	4.6e-05	0.0012
ARNT2	12100	56	483	2.24	10	6.4e-05	0.0017
TOB1	12100	57	483	2.28	10	7.5e-05	0.0019
E2F3	12100	133	483	5.31	16	7.8e-05	0.002
POLR3C	12100	81	483	3.23	12	8.2e-05	0.002
MAF	12100	47	483	1.88	9	8.4e-05	0.002
SOX4	12100	70	483	2.79	11	9.4e-05	0.0022
ASB9	12100	38	483	1.52	8	0.0001	0.0024
TCF7L1	12100	123	483	4.91	15	0.00011	0.0025
AR	12100	85	483	3.39	12	0.00013	0.0029
ATF4	12100	111	483	4.43	14	0.00013	0.0029
ILF2	12100	113	483	4.51	14	0.00016	0.0034
FHL2	12100	22	483	0.88	6	0.00017	0.0036
BARD1	12100	31	483	1.24	7	0.00018	0.0036
EZH2	12100	31	483	1.24	7	0.00018	0.0036
TFDP1	12100	54	483	2.16	9	0.00026	0.0051
ZDHHC13	12100	33	483	1.32	7	0.00027	0.0053
HTATIP2	12100	154	483	6.15	16	0.00043	0.0082
FBXO7	12100	110	483	4.39	13	0.00043	0.0082
SMARCA2	12100	112	483	4.47	13	0.00051	0.0096
E2F8	12100	18	483	0.72	5	0.00055	0.01
ZNF688	12100	99	483	3.95	12	0.00056	0.01
NR5A2	12100	50	483	2	8	0.00075	0.013
TRIM31	12100	40	483	1.6	7	0.00092	0.016
SNRPB	12100	77	483	3.07	10	0.00093	0.016
TSC22D3	12100	21	483	0.84	5	0.0012	0.02
AFF3	12100	44	483	1.76	7	0.0016	0.027
RORA	12100	44	483	1.76	7	0.0016	0.027
CNOT6	12100	128	483	5.11	13	0.0018	0.029
BTG1	12100	115	483	4.59	12	0.0021	0.034
NFIB	12100	59	483	2.36	8	0.0023	0.036
ZBTB16	12100	35	483	1.4	6	0.0024	0.037
ZFPM2	12100	60	483	2.4	8	0.0025	0.039
NR1H4	12100	91	483	3.63	10	0.0033	0.05
TRIB3	12100	106	483	4.23	11	0.0033	0.05

## Sheet: GO_AllLists
Category	CategoryID	GO	Description	LogP	Enrichment	Z-score	#TotalGeneInLibrary	#GeneInGO	#GeneInHitList	#GeneInGOAndHitList	%InGO	STDV %InGO	GeneID	Hits	Log(q-value)	GeneList
GO Biological Processes	19	GO:0000122	negative regulation of transcription by RNA polymerase II	-22.4577	10.0632	16.2245	22539	789	88	31	35.2273	5.09207	367|1602|2099|2117|2146|2305|3394|3397|4094|4783|4854|5993|6299|6595|6662|6720|6943|7025|8431|8462|9242|9611|9678|10062|23314|23414|23462|23466|51176|79733|83463	AR|DACH1|ESR1|ETV3|EZH2|FOXM1|IRF8|ID1|MAF|NFIL3|NOTCH3|RFX5|SALL1|SMARCA2|SOX9|SREBF1|TCF21|NR2F1|NR0B2|KLF11|MSC|NCOR1|PHF14|NR1H3|SATB2|ZFPM2|HEY1|CBX6|LEF1|E2F8|MXD3	-18.4584	Subtype_1
GO Biological Processes	19	GO:0006367	transcription initiation from RNA polymerase II promoter	-16.6831	22.0323	18.0325	22539	186	88	16	18.1818	4.11152	367|1602|2099|2104|3394|4306|4854|6662|6925|7025|8431|8856|9970|10062|10891|10923	AR|DACH1|ESR1|ESRRG|IRF8|NR3C2|NOTCH3|SOX9|TCF4|NR2F1|NR0B2|NR1I2|NR1I3|NR1H3|PPARGC1A|SUB1	-12.9848	Subtype_1
GO Biological Processes	19	GO:0006352	DNA-templated transcription, initiation	-16.2574	18.0669	16.6768	22539	241	88	17	19.3182	4.20852	367|1602|2099|2104|3394|4306|4854|6662|6925|7025|8431|8856|9970|10062|10302|10891|10923	AR|DACH1|ESR1|ESRRG|IRF8|NR3C2|NOTCH3|SOX9|TCF4|NR2F1|NR0B2|NR1I2|NR1I3|NR1H3|SNAPC5|PPARGC1A|SUB1	-12.656	Subtype_1
GO Biological Processes	19	GO:0006325	chromatin organization	-12.7981	7.28946	11.1402	22539	773	88	22	25	4.61593	675|1643|2099|2146|4869|5757|6299|6594|6595|6662|6720|9611|10626|10891|11169|23314|23408|23410|23466|26039|51176|51317	BRCA2|DDB2|ESR1|EZH2|NPM1|PTMA|SALL1|SMARCA1|SMARCA2|SOX9|SREBF1|NCOR1|TRIM16|PPARGC1A|WDHD1|SATB2|SIRT5|SIRT3|CBX6|SS18L1|LEF1|PHF21A	-9.67385	Subtype_1
Reactome Gene Sets	6	R-HSA-383280	Nuclear Receptor transcription pathway	-12.5165	46.1025	19.9886	22539	50	88	9	10.2273	3.23006	367|2099|2104|4306|7025|8431|8856|9970|10062	AR|ESR1|ESRRG|NR3C2|NR2F1|NR0B2|NR1I2|NR1I3|NR1H3	-9.47138	Subtype_1
GO Biological Processes	19	GO:0043401	steroid hormone mediated signaling pathway	-10.9451	16.0916	13.1134	22539	191	88	12	13.6364	3.65825	367|2099|2104|4306|6943|7025|8431|8856|9970|10062|10891|51176	AR|ESR1|ESRRG|NR3C2|TCF21|NR2F1|NR0B2|NR1I2|NR1I3|NR1H3|PPARGC1A|LEF1	-8.07614	Subtype_1
GO Biological Processes	19	GO:0071383	cellular response to steroid hormone stimulus	-10.6201	12.9055	12.0413	22539	258	88	13	14.7727	3.78249	367|2099|2104|4306|6943|7025|8431|8856|9970|10062|10891|23462|51176	AR|ESR1|ESRRG|NR3C2|TCF21|NR2F1|NR0B2|NR1I2|NR1I3|NR1H3|PPARGC1A|HEY1|LEF1	-7.76693	Subtype_1
GO Biological Processes	19	GO:0048545	response to steroid hormone	-10.557	9.87629	11.0561	22539	389	88	15	17.0455	4.00851	367|2099|2104|2353|4306|6720|6943|7025|8431|8856|9970|10062|10891|23462|51176	AR|ESR1|ESRRG|FOS|NR3C2|SREBF1|TCF21|NR2F1|NR0B2|NR1I2|NR1I3|NR1H3|PPARGC1A|HEY1|LEF1	-7.719	Subtype_1
GO Biological Processes	19	GO:0071407	cellular response to organic cyclic compound	-10.1988	7.65224	10.0621	22539	569	88	17	19.3182	4.20852	367|2099|2104|2146|3397|4306|4869|6943|7025|8431|8856|9611|9970|10062|10891|23462|51176	AR|ESR1|ESRRG|EZH2|ID1|NR3C2|NPM1|TCF21|NR2F1|NR0B2|NR1I2|NCOR1|NR1I3|NR1H3|PPARGC1A|HEY1|LEF1	-7.38985	Subtype_1
GO Biological Processes	19	GO:0009755	hormone-mediated signaling pathway	-9.95992	13.2478	11.7399	22539	232	88	12	13.6364	3.65825	367|2099|2104|4306|6943|7025|8431|8856|9970|10062|10891|51176	AR|ESR1|ESRRG|NR3C2|TCF21|NR2F1|NR0B2|NR1I2|NR1I3|NR1H3|PPARGC1A|LEF1	-7.16471	Subtype_1
GO Biological Processes	19	GO:0071396	cellular response to lipid	-9.2466	7.22751	9.4027	22539	567	88	16	18.1818	4.11152	367|2099|2104|3394|4306|6662|6720|6943|7025|8431|8856|9970|10062|10891|23462|51176	AR|ESR1|ESRRG|IRF8|NR3C2|SOX9|SREBF1|TCF21|NR2F1|NR0B2|NR1I2|NR1I3|NR1H3|PPARGC1A|HEY1|LEF1	-6.46475	Subtype_1
GO Biological Processes	19	GO:0030522	intracellular receptor signaling pathway	-8.93612	10.7842	10.407	22539	285	88	12	13.6364	3.65825	367|2099|2104|2146|6720|6943|7025|8856|9970|10062|10626|10891	AR|ESR1|ESRRG|EZH2|SREBF1|TCF21|NR2F1|NR1I2|NR1I3|NR1H3|TRIM16|PPARGC1A	-6.17984	Subtype_1
GO Biological Processes	19	GO:0016569	covalent chromatin modification	-8.40723	6.89744	8.82346	22539	557	88	15	17.0455	4.00851	675|1643|2146|6299|6594|6720|9611|10626|10891|23314|23410|23466|26039|51176|51317	BRCA2|DDB2|EZH2|SALL1|SMARCA1|SREBF1|NCOR1|TRIM16|PPARGC1A|SATB2|SIRT3|CBX6|SS18L1|LEF1|PHF21A	-5.66318	Subtype_1
GO Biological Processes	19	GO:0003006	developmental process involved in reproduction	-8.3113	6.21851	8.5123	22539	659	88	16	18.1818	4.11152	367|675|1602|2099|2626|5087|5324|6299|6595|6662|6943|9319|23414|23462|51176|79733	AR|BRCA2|DACH1|ESR1|GATA4|PBX1|PLAG1|SALL1|SMARCA2|SOX9|TCF21|TRIP13|ZFPM2|HEY1|LEF1|E2F8	-5.59073	Subtype_1
Reactome Gene Sets	6	R-HSA-8878166	Transcriptional regulation by RUNX2	-7.61037	16.9339	11.0026	22539	121	88	8	9.09091	3.06454	367|2099|4091|4094|6662|10891|23314|23462	AR|ESR1|SMAD6|MAF|SOX9|PPARGC1A|SATB2|HEY1	-4.93326	Subtype_1
CORUM	33	CORUM:2791	MCM4-MCM6-MCM7 complex	-7.24025	256.125	27.6666	22539	3	88	3	3.40909	1.9344	4173|4175|4176	MCM4|MCM6|MCM7	-4.61199	Subtype_1
GO Biological Processes	19	GO:0032870	cellular response to hormone stimulus	-7.19154	5.58412	7.64532	22539	688	88	15	17.0455	4.00851	367|2099|2104|2353|4306|6720|6943|7025|8431|8856|9970|10062|10891|23462|51176	AR|ESR1|ESRRG|FOS|NR3C2|SREBF1|TCF21|NR2F1|NR0B2|NR1I2|NR1I3|NR1H3|PPARGC1A|HEY1|LEF1	-4.57361	Subtype_1
GO Biological Processes	19	GO:0060541	respiratory system development	-7.18377	11.9437	9.55922	22539	193	88	9	10.2273	3.23006	3397|6662|6720|6943|7289|9242|9678|23414|51176	ID1|SOX9|SREBF1|TCF21|TULP3|MSC|PHF14|ZFPM2|LEF1	-4.57361	Subtype_1
GO Biological Processes	19	GO:0007548	sex differentiation	-7.03536	9.5927	8.84274	22539	267	88	10	11.3636	3.38317	367|675|1602|2099|2626|5087|6299|6662|6943|23414	AR|BRCA2|DACH1|ESR1|GATA4|PBX1|SALL1|SOX9|TCF21|ZFPM2	-4.44131	Subtype_1
GO Biological Processes	19	GO:0060736	prostate gland growth	-6.97947	85.375	18.3035	22539	12	88	4	4.54545	2.22047	367|2099|5324|6662	AR|ESR1|PLAG1|SOX9	-4.40339	Subtype_1
GO Biological Processes	19	GO:0048608	reproductive structure development	-6.95579	7.14767	8.05827	22539	430	88	12	13.6364	3.65825	367|675|2099|2626|5324|6299|6662|6943|23414|23462|51176|79733	AR|BRCA2|ESR1|GATA4|PLAG1|SALL1|SOX9|TCF21|ZFPM2|HEY1|LEF1|E2F8	-4.38783	Subtype_1
GO Biological Processes	19	GO:0061458	reproductive system development	-6.92319	7.09815	8.02174	22539	433	88	12	13.6364	3.65825	367|675|2099|2626|5324|6299|6662|6943|23414|23462|51176|79733	AR|BRCA2|ESR1|GATA4|PLAG1|SALL1|SOX9|TCF21|ZFPM2|HEY1|LEF1|E2F8	-4.37712	Subtype_1
Reactome Gene Sets	6	R-HSA-8941326	RUNX2 regulates bone development	-6.8243	40.0195	13.8286	22539	32	88	5	5.68182	2.46774	367|4091|4094|23314|23462	AR|SMAD6|MAF|SATB2|HEY1	-4.29479	Subtype_1
GO Biological Processes	19	GO:0045137	development of primary sexual characteristics	-6.69887	10.4778	8.84432	22539	220	88	9	10.2273	3.23006	367|675|1602|2099|2626|6299|6662|6943|23414	AR|BRCA2|DACH1|ESR1|GATA4|SALL1|SOX9|TCF21|ZFPM2	-4.19785	Subtype_1
CORUM	33	CORUM:2792	MCM2-MCM4-MCM6-MCM7 complex	-6.63942	192.094	23.9292	22539	4	88	3	3.40909	1.9344	4173|4175|4176	MCM4|MCM6|MCM7	-4.14524	Subtype_1
GO Biological Processes	19	GO:0060562	epithelial tube morphogenesis	-6.35931	8.10522	7.96345	22539	316	88	10	11.3636	3.38317	367|2099|2626|5087|6299|6662|6943|7289|9355|51176	AR|ESR1|GATA4|PBX1|SALL1|SOX9|TCF21|TULP3|LHX2|LEF1	-3.91629	Subtype_1
GO Biological Processes	19	GO:0048732	gland development	-6.11676	6.67624	7.36945	22539	422	88	11	12.5	3.52548	367|675|2099|2146|5087|5324|6299|6662|6943|51176|79733	AR|BRCA2|ESR1|EZH2|PBX1|PLAG1|SALL1|SOX9|TCF21|LEF1|E2F8	-3.71403	Subtype_1
GO Biological Processes	19	GO:0048568	embryonic organ development	-6.07664	6.61356	7.32319	22539	426	88	11	12.5	3.52548	2626|5087|6299|6662|6943|7289|23314|23414|23462|51176|79733	GATA4|PBX1|SALL1|SOX9|TCF21|TULP3|SATB2|ZFPM2|HEY1|LEF1|E2F8	-3.67937	Subtype_1
CORUM	33	CORUM:387	MCM complex	-5.94291	128.062	19.4879	22539	6	88	3	3.40909	1.9344	4173|4175|4176	MCM4|MCM6|MCM7	-3.57705	Subtype_1
Canonical Pathways	11	M288	PID HES HEY PATHWAY	-5.91605	26.6797	11.1503	22539	48	88	5	5.68182	2.46774	367|2626|3397|9611|23462	AR|GATA4|ID1|NCOR1|HEY1	-3.56512	Subtype_1
GO Biological Processes	19	GO:0000082	G1/S transition of mitotic cell cycle	-5.91394	8.44368	7.74692	22539	273	88	9	10.2273	3.23006	1820|2146|4173|4175|4176|4869|8462|57472|79733	ARID3A|EZH2|MCM4|MCM6|MCM7|NPM1|KLF11|CNOT6|E2F8	-3.56512	Subtype_1
GO Biological Processes	19	GO:0030855	epithelial cell differentiation	-5.84331	4.70571	6.51525	22539	762	88	14	15.9091	3.89902	367|2099|2146|2626|3397|4094|4831|6299|6662|6943|10626|23462|51176|79733	AR|ESR1|EZH2|GATA4|ID1|MAF|NME2|SALL1|SOX9|TCF21|TRIM16|HEY1|LEF1|E2F8	-3.50199	Subtype_1
GO Biological Processes	19	GO:0044772	mitotic cell cycle phase transition	-5.74127	5.48839	6.73383	22539	560	88	12	13.6364	3.65825	1820|2146|2305|4173|4175|4176|4869|5087|8462|9319|57472|79733	ARID3A|EZH2|FOXM1|MCM4|MCM6|MCM7|NPM1|PBX1|KLF11|TRIP13|CNOT6|E2F8	-3.40957	Subtype_1
GO Biological Processes	19	GO:0043009	chordate embryonic development	-5.72524	5.46886	6.71679	22539	562	88	12	13.6364	3.65825	367|675|5087|6662|7289|9355|9915|23314|23414|23462|51176|79733	AR|BRCA2|PBX1|SOX9|TULP3|LHX2|ARNT2|SATB2|ZFPM2|HEY1|LEF1|E2F8	-3.40261	Subtype_1
GO Biological Processes	19	GO:0008406	gonad development	-5.71184	9.57477	7.89068	22539	214	88	8	9.09091	3.06454	367|675|2099|2626|6299|6662|6943|23414	AR|BRCA2|ESR1|GATA4|SALL1|SOX9|TCF21|ZFPM2	-3.39902	Subtype_1
GO Biological Processes	19	GO:0044843	cell cycle G1/S phase transition	-5.67327	7.89426	7.42377	22539	292	88	9	10.2273	3.23006	1820|2146|4173|4175|4176|4869|8462|57472|79733	ARID3A|EZH2|MCM4|MCM6|MCM7|NPM1|KLF11|CNOT6|E2F8	-3.38579	Subtype_1
Reactome Gene Sets	6	R-HSA-8940973	RUNX2 regulates osteoblast differentiation	-5.66325	42.6875	12.7925	22539	24	88	4	4.54545	2.22047	367|4094|23314|23462	AR|MAF|SATB2|HEY1	-3.38409	Subtype_1
GO Biological Processes	19	GO:0048754	branching morphogenesis of an epithelial tube	-5.65367	11.7952	8.36059	22539	152	88	7	7.95455	2.88448	367|2099|5087|6299|6662|6943|51176	AR|ESR1|PBX1|SALL1|SOX9|TCF21|LEF1	-3.37862	Subtype_1
GO Biological Processes	19	GO:0009792	embryo development ending in birth or egg hatching	-5.58399	5.29914	6.56705	22539	580	88	12	13.6364	3.65825	367|675|5087|6662|7289|9355|9915|23314|23414|23462|51176|79733	AR|BRCA2|PBX1|SOX9|TULP3|LHX2|ARNT2|SATB2|ZFPM2|HEY1|LEF1|E2F8	-3.32896	Subtype_1
Reactome Gene Sets	6	R-HSA-2151201	Transcriptional activation of mitochondrial biogenesis	-5.57824	22.8683	10.258	22539	56	88	5	5.68182	2.46774	4209|9611|10891|23408|23410	MEF2D|NCOR1|PPARGC1A|SIRT5|SIRT3	-3.3271	Subtype_1
GO Biological Processes	19	GO:0006268	DNA unwinding involved in DNA replication	-5.49821	96.0469	16.8335	22539	8	88	3	3.40909	1.9344	4173|4175|4176	MCM4|MCM6|MCM7	-3.2675	Subtype_1
GO Biological Processes	19	GO:0060537	muscle tissue development	-5.49597	6.50063	6.89611	22539	394	88	10	11.3636	3.38317	2353|2626|3131|4209|6662|6943|9242|10891|23414|51176	FOS|GATA4|HLF|MEF2D|SOX9|TCF21|MSC|PPARGC1A|ZFPM2|LEF1	-3.2675	Subtype_1
GO Biological Processes	19	GO:0048511	rhythmic process	-5.43833	7.38822	7.11374	22539	312	88	9	10.2273	3.23006	2099|2146|3131|3397|4783|6720|9611|10062|10891	ESR1|EZH2|HLF|ID1|NFIL3|SREBF1|NCOR1|NR1H3|PPARGC1A	-3.22788	Subtype_1
GO Biological Processes	19	GO:0044770	cell cycle phase transition	-5.42566	5.11398	6.40003	22539	601	88	12	13.6364	3.65825	1820|2146|2305|4173|4175|4176|4869|5087|8462|9319|57472|79733	ARID3A|EZH2|FOXM1|MCM4|MCM6|MCM7|NPM1|PBX1|KLF11|TRIP13|CNOT6|E2F8	-3.22002	Subtype_1
GO Biological Processes	19	GO:0006338	chromatin remodeling	-5.39973	10.8005	7.93449	22539	166	88	7	7.95455	2.88448	2099|4869|5757|6594|6595|6662|23314	ESR1|NPM1|PTMA|SMARCA1|SMARCA2|SOX9|SATB2	-3.20996	Subtype_1
GO Biological Processes	19	GO:0001655	urogenital system development	-5.38225	7.27169	7.0405	22539	317	88	9	10.2273	3.23006	367|2099|4091|4854|5087|5324|6299|6662|6943	AR|ESR1|SMAD6|NOTCH3|PBX1|PLAG1|SALL1|SOX9|TCF21	-3.20273	Subtype_1
GO Biological Processes	19	GO:0030330	DNA damage response, signal transduction by p53 class mediator	-5.33615	13.9705	8.53744	22539	110	88	6	6.81818	2.68694	675|1820|2305|4869|57472|79733	BRCA2|ARID3A|FOXM1|NPM1|CNOT6|E2F8	-3.16613	Subtype_1
GO Biological Processes	19	GO:0030323	respiratory tube development	-5.31469	10.4846	7.79448	22539	171	88	7	7.95455	2.88448	3397|6662|6720|6943|7289|9678|23414	ID1|SOX9|SREBF1|TCF21|TULP3|PHF14|ZFPM2	-3.15735	Subtype_1
GO Biological Processes	19	GO:0003281	ventricular septum development	-5.19006	19.1138	9.29624	22539	67	88	5	5.68182	2.46774	2626|4091|6299|23414|23462	GATA4|SMAD6|SALL1|ZFPM2|HEY1	-3.07154	Subtype_1
GO Biological Processes	19	GO:0048729	tissue morphogenesis	-5.16223	4.8174	6.12388	22539	638	88	12	13.6364	3.65825	367|2099|2626|5087|6299|6662|6943|7289|9355|23414|23462|51176	AR|ESR1|GATA4|PBX1|SALL1|SOX9|TCF21|TULP3|LHX2|ZFPM2|HEY1|LEF1	-3.0522	Subtype_1
GO Biological Processes	19	GO:0061138	morphogenesis of a branching epithelium	-5.10582	9.74389	7.45602	22539	184	88	7	7.95455	2.88448	367|2099|5087|6299|6662|6943|51176	AR|ESR1|PBX1|SALL1|SOX9|TCF21|LEF1	-3.01229	Subtype_1
Reactome Gene Sets	6	R-HSA-400253	Circadian Clock	-5.09603	18.2946	9.07298	22539	70	88	5	5.68182	2.46774	4209|4783|6720|9611|10891	MEF2D|NFIL3|SREBF1|NCOR1|PPARGC1A	-3.00786	Subtype_1
GO Biological Processes	19	GO:0030279	negative regulation of ossification	-5.06564	18.037	9.00162	22539	71	88	5	5.68182	2.46774	3397|4091|6662|8994|10140	ID1|SMAD6|SOX9|LIMD1|TOB1	-2.9906	Subtype_1
GO Biological Processes	19	GO:0016570	histone modification	-5.0317	5.75562	6.34353	22539	445	88	10	11.3636	3.38317	675|1643|2146|6299|6720|10626|10891|23410|51176|51317	BRCA2|DDB2|EZH2|SALL1|SREBF1|TRIM16|PPARGC1A|SIRT3|LEF1|PHF21A	-2.95923	Subtype_1
GO Biological Processes	19	GO:0007623	circadian rhythm	-4.95596	9.24162	7.2178	22539	194	88	7	7.95455	2.88448	2146|3397|4783|6720|9611|10062|10891	EZH2|ID1|NFIL3|SREBF1|NCOR1|NR1H3|PPARGC1A	-2.90358	Subtype_1
GO Biological Processes	19	GO:0001763	morphogenesis of a branching structure	-4.91267	9.10089	7.14967	22539	197	88	7	7.95455	2.88448	367|2099|5087|6299|6662|6943|51176	AR|ESR1|PBX1|SALL1|SOX9|TCF21|LEF1	-2.87239	Subtype_1
Reactome Gene Sets	6	R-HSA-176974	Unwinding of DNA	-4.90889	64.0312	13.6734	22539	12	88	3	3.40909	1.9344	4173|4175|4176	MCM4|MCM6|MCM7	-2.87098	Subtype_1
GO Biological Processes	19	GO:0001503	ossification	-4.84366	6.23007	6.35062	22539	370	88	9	10.2273	3.23006	3397|4091|4209|5087|6662|8994|10140|23314|51176	ID1|SMAD6|MEF2D|PBX1|SOX9|LIMD1|TOB1|SATB2|LEF1	-2.8172	Subtype_1
GO Biological Processes	19	GO:0042770	signal transduction in response to DNA damage	-4.84339	11.4683	7.60916	22539	134	88	6	6.81818	2.68694	675|1820|2305|4869|57472|79733	BRCA2|ARID3A|FOXM1|NPM1|CNOT6|E2F8	-2.8172	Subtype_1
GO Biological Processes	19	GO:0008584	male gonad development	-4.80676	11.2996	7.54257	22539	136	88	6	6.81818	2.68694	367|2099|2626|6662|6943|23414	AR|ESR1|GATA4|SOX9|TCF21|ZFPM2	-2.79529	Subtype_1
GO Biological Processes	19	GO:0007420	brain development	-4.79072	4.4223	5.73754	22539	695	88	12	13.6364	3.65825	675|2146|3397|4854|6299|6594|7289|9355|9915|10891|23314|51176	BRCA2|EZH2|ID1|NOTCH3|SALL1|SMARCA1|TULP3|LHX2|ARNT2|PPARGC1A|SATB2|LEF1	-2.79114	Subtype_1
GO Biological Processes	19	GO:0046546	development of primary male sexual characteristics	-4.78866	11.2172	7.50979	22539	137	88	6	6.81818	2.68694	367|2099|2626|6662|6943|23414	AR|ESR1|GATA4|SOX9|TCF21|ZFPM2	-2.79114	Subtype_1
Canonical Pathways	11	M176	PID FOXM1 PATHWAY	-4.74942	25.6125	9.75406	22539	40	88	4	4.54545	2.22047	675|2099|2305|2353	BRCA2|ESR1|FOXM1|FOS	-2.7587	Subtype_1
GO Biological Processes	19	GO:0032392	DNA geometric change	-4.70798	15.2455	8.18923	22539	84	88	5	5.68182	2.46774	1643|4173|4175|4176|6594	DDB2|MCM4|MCM6|MCM7|SMARCA1	-2.72777	Subtype_1
Canonical Pathways	11	M195	PID CMYB PATHWAY	-4.70798	15.2455	8.18923	22539	84	88	5	5.68182	2.46774	4094|4173|6595|9611|51176	MAF|MCM4|SMARCA2|NCOR1|LEF1	-2.72777	Subtype_1
KEGG Pathway	24	hsa05224	Breast cancer	-4.66589	10.6719	7.2895	22539	144	88	6	6.81818	2.68694	675|2099|2353|4854|23462|51176	BRCA2|ESR1|FOS|NOTCH3|HEY1|LEF1	-2.6969	Subtype_1
GO Biological Processes	19	GO:0051090	regulation of DNA binding transcription factor activity	-4.6632	5.91058	6.12448	22539	390	88	9	10.2273	3.23006	367|2099|2146|2353|3397|4869|8431|10891|11074	AR|ESR1|EZH2|FOS|ID1|NPM1|NR0B2|PPARGC1A|TRIM31	-2.6969	Subtype_1
GO Biological Processes	19	GO:0008285	negative regulation of cell proliferation	-4.60994	4.23931	5.55054	22539	725	88	12	13.6364	3.65825	367|675|1602|2117|4091|4869|6595|6662|8462|9678|10140|10891	AR|BRCA2|DACH1|ETV3|SMAD6|NPM1|SMARCA2|SOX9|KLF11|PHF14|TOB1|PPARGC1A	-2.6516	Subtype_1
GO Biological Processes	19	GO:0006261	DNA-dependent DNA replication	-4.58215	10.3138	7.14122	22539	149	88	6	6.81818	2.68694	675|1602|4173|4175|4176|79733	BRCA2|DACH1|MCM4|MCM6|MCM7|E2F8	-2.62619	Subtype_1
GO Biological Processes	19	GO:0060322	head development	-4.5749	4.20451	5.51435	22539	731	88	12	13.6364	3.65825	675|2146|3397|4854|6299|6594|7289|9355|9915|10891|23314|51176	BRCA2|EZH2|ID1|NOTCH3|SALL1|SMARCA1|TULP3|LHX2|ARNT2|PPARGC1A|SATB2|LEF1	-2.6209	Subtype_1
GO Biological Processes	19	GO:0010564	regulation of cell cycle process	-4.49452	4.1255	5.43139	22539	745	88	12	13.6364	3.65825	675|1602|1820|2146|2305|4869|5087|6662|9232|9319|57472|79733	BRCA2|DACH1|ARID3A|EZH2|FOXM1|NPM1|PBX1|SOX9|PTTG1|TRIP13|CNOT6|E2F8	-2.55777	Subtype_1
Reactome Gene Sets	6	R-HSA-1592230	Mitochondrial biogenesis	-4.44918	13.4803	7.63162	22539	95	88	5	5.68182	2.46774	4209|9611|10891|23408|23410	MEF2D|NCOR1|PPARGC1A|SIRT5|SIRT3	-2.53041	Subtype_1
GO Biological Processes	19	GO:0046661	male sex differentiation	-4.42358	9.66509	6.86472	22539	159	88	6	6.81818	2.68694	367|2099|2626|6662|6943|23414	AR|ESR1|GATA4|SOX9|TCF21|ZFPM2	-2.51061	Subtype_1
GO Biological Processes	19	GO:0061061	muscle structure development	-4.41335	4.40904	5.4732	22539	639	88	11	12.5	3.52548	2146|2353|2626|3131|4209|6662|6943|9242|23414|23462|51176	EZH2|FOS|GATA4|HLF|MEF2D|SOX9|TCF21|MSC|ZFPM2|HEY1|LEF1	-2.50216	Subtype_1
GO Biological Processes	19	GO:0001657	ureteric bud development	-4.40562	13.2023	7.54013	22539	97	88	5	5.68182	2.46774	4091|5087|6299|6662|6943	SMAD6|PBX1|SALL1|SOX9|TCF21	-2.4962	Subtype_1
Reactome Gene Sets	6	R-HSA-6791312	TP53 Regulates Transcription of Cell Cycle Genes	-4.39587	20.9082	8.73405	22539	49	88	4	4.54545	2.22047	1820|4869|57472|79733	ARID3A|NPM1|CNOT6|E2F8	-2.49384	Subtype_1
GO Biological Processes	19	GO:0030850	prostate gland development	-4.39587	20.9082	8.73405	22539	49	88	4	4.54545	2.22047	367|2099|5324|6662	AR|ESR1|PLAG1|SOX9	-2.49384	Subtype_1
GO Biological Processes	19	GO:0072163	mesonephric epithelium development	-4.38421	13.0676	7.49539	22539	98	88	5	5.68182	2.46774	4091|5087|6299|6662|6943	SMAD6|PBX1|SALL1|SOX9|TCF21	-2.48869	Subtype_1
GO Biological Processes	19	GO:0072164	mesonephric tubule development	-4.38421	13.0676	7.49539	22539	98	88	5	5.68182	2.46774	4091|5087|6299|6662|6943	SMAD6|PBX1|SALL1|SOX9|TCF21	-2.48869	Subtype_1
GO Biological Processes	19	GO:0002009	morphogenesis of an epithelium	-4.38236	4.83255	5.58993	22539	530	88	10	11.3636	3.38317	367|2099|2626|5087|6299|6662|6943|7289|9355|51176	AR|ESR1|GATA4|PBX1|SALL1|SOX9|TCF21|TULP3|LHX2|LEF1	-2.48855	Subtype_1
GO Biological Processes	19	GO:0006476	protein deacetylation	-4.36303	12.9356	7.4513	22539	99	88	5	5.68182	2.46774	6299|6720|23408|23410|51317	SALL1|SREBF1|SIRT5|SIRT3|PHF21A	-2.47597	Subtype_1
GO Biological Processes	19	GO:0003279	cardiac septum development	-4.34208	12.8063	7.40784	22539	100	88	5	5.68182	2.46774	2626|4091|6299|23414|23462	GATA4|SMAD6|SALL1|ZFPM2|HEY1	-2.46333	Subtype_1
GO Biological Processes	19	GO:0043392	negative regulation of DNA binding	-4.32677	20.0882	8.54391	22539	51	88	4	4.54545	2.22047	3397|9355|23462|51176	ID1|LHX2|HEY1|LEF1	-2.45455	Subtype_1
GO Biological Processes	19	GO:0030324	lung development	-4.30445	9.2021	6.66058	22539	167	88	6	6.81818	2.68694	3397|6662|6720|6943|9678|23414	ID1|SOX9|SREBF1|TCF21|PHF14|ZFPM2	-2.43707	Subtype_1
GO Biological Processes	19	GO:0001823	mesonephros development	-4.30086	12.5551	7.32275	22539	102	88	5	5.68182	2.46774	4091|5087|6299|6662|6943	SMAD6|PBX1|SALL1|SOX9|TCF21	-2.43667	Subtype_1
GO Biological Processes	19	GO:0060485	mesenchyme development	-4.29482	7.28811	6.20847	22539	246	88	7	7.95455	2.88448	2146|2626|6662|6943|23414|23462|51176	EZH2|GATA4|SOX9|TCF21|ZFPM2|HEY1|LEF1	-2.43537	Subtype_1
GO Biological Processes	19	GO:0071772	response to BMP	-4.26141	9.03971	6.58753	22539	170	88	6	6.81818	2.68694	2626|3397|4091|6662|10140|51176	GATA4|ID1|SMAD6|SOX9|TOB1|LEF1	-2.4113	Subtype_1
GO Biological Processes	19	GO:0071773	cellular response to BMP stimulus	-4.26141	9.03971	6.58753	22539	170	88	6	6.81818	2.68694	2626|3397|4091|6662|10140|51176	GATA4|ID1|SMAD6|SOX9|TOB1|LEF1	-2.4113	Subtype_1
GO Biological Processes	19	GO:0035265	organ growth	-4.23317	8.93459	6.53983	22539	172	88	6	6.81818	2.68694	367|2099|2626|5324|6662|23414	AR|ESR1|GATA4|PLAG1|SOX9|ZFPM2	-2.39221	Subtype_1
GO Biological Processes	19	GO:0035601	protein deacylation	-4.16321	11.7489	7.04274	22539	109	88	5	5.68182	2.46774	6299|6720|23408|23410|51317	SALL1|SREBF1|SIRT5|SIRT3|PHF21A	-2.34984	Subtype_1
GO Biological Processes	19	GO:0098732	macromolecule deacylation	-4.14433	11.642	7.00483	22539	110	88	5	5.68182	2.46774	6299|6720|23408|23410|51317	SALL1|SREBF1|SIRT5|SIRT3|PHF21A	-2.33952	Subtype_1
GO Biological Processes	19	GO:2000678	negative regulation of transcription regulatory region DNA binding	-4.13851	36.5893	10.2152	22539	21	88	3	3.40909	1.9344	3397|9355|23462	ID1|LHX2|HEY1	-2.33784	Subtype_1
GO Biological Processes	19	GO:0060261	positive regulation of transcription initiation from RNA polymerase II promoter	-4.13851	36.5893	10.2152	22539	21	88	3	3.40909	1.9344	2099|3394|10923	ESR1|IRF8|SUB1	-2.33784	Subtype_1
GO Biological Processes	19	GO:0071156	regulation of cell cycle arrest	-4.08881	11.333	6.89397	22539	113	88	5	5.68182	2.46774	1820|2305|4869|57472|79733	ARID3A|FOXM1|NPM1|CNOT6|E2F8	-2.303	Subtype_1
GO Biological Processes	19	GO:0001658	branching involved in ureteric bud morphogenesis	-4.07674	17.3644	7.87969	22539	59	88	4	4.54545	2.22047	5087|6299|6662|6943	PBX1|SALL1|SOX9|TCF21	-2.29225	Subtype_1
GO Biological Processes	19	GO:0030278	regulation of ossification	-4.07111	8.3519	6.26906	22539	184	88	6	6.81818	2.68694	3397|4091|5087|6662|8994|10140	ID1|SMAD6|PBX1|SOX9|LIMD1|TOB1	-2.28795	Subtype_1
GO Biological Processes	19	GO:2000134	negative regulation of G1/S transition of mitotic cell cycle	-4.05268	11.1359	6.82236	22539	115	88	5	5.68182	2.46774	1820|2146|4869|57472|79733	ARID3A|EZH2|NPM1|CNOT6|E2F8	-2.27607	Subtype_1
GO Biological Processes	19	GO:0048598	embryonic morphogenesis	-4.038	4.39322	5.19699	22539	583	88	10	11.3636	3.38317	367|2626|5087|6299|6662|6943|7289|9355|23314|51176	AR|GATA4|PBX1|SALL1|SOX9|TCF21|TULP3|LHX2|SATB2|LEF1	-2.26527	Subtype_1
GO Biological Processes	19	GO:0007530	sex determination	-4.0166	33.4076	9.73524	22539	23	88	3	3.40909	1.9344	367|6662|6943	AR|SOX9|TCF21	-2.24516	Subtype_1
GO Biological Processes	19	GO:0006977	DNA damage response, signal transduction by p53 class mediator resulting in cell cycle arrest	-3.99222	16.5242	7.66332	22539	62	88	4	4.54545	2.22047	1820|4869|57472|79733	ARID3A|NPM1|CNOT6|E2F8	-2.22652	Subtype_1
GO Biological Processes	19	GO:0071824	protein-DNA complex subunit organization	-3.99158	6.51955	5.76566	22539	275	88	7	7.95455	2.88448	1602|1643|2099|4869|5757|6662|6925	DACH1|DDB2|ESR1|NPM1|PTMA|SOX9|TCF4	-2.22652	Subtype_1
GO Biological Processes	19	GO:0048589	developmental growth	-3.96535	4.30462	5.1145	22539	595	88	10	11.3636	3.38317	367|675|2099|2146|2626|5324|6299|6662|9355|23414	AR|BRCA2|ESR1|EZH2|GATA4|PLAG1|SALL1|SOX9|LHX2|ZFPM2	-2.20723	Subtype_1
GO Biological Processes	19	GO:0072431	signal transduction involved in mitotic G1 DNA damage checkpoint	-3.96503	16.2619	7.59453	22539	63	88	4	4.54545	2.22047	1820|4869|57472|79733	ARID3A|NPM1|CNOT6|E2F8	-2.20723	Subtype_1
GO Biological Processes	19	GO:1902400	intracellular signal transduction involved in G1 DNA damage checkpoint	-3.96503	16.2619	7.59453	22539	63	88	4	4.54545	2.22047	1820|4869|57472|79733	ARID3A|NPM1|CNOT6|E2F8	-2.20723	Subtype_1
GO Biological Processes	19	GO:0003231	cardiac ventricle development	-3.94828	10.5837	6.61771	22539	121	88	5	5.68182	2.46774	2626|4091|6299|23414|23462	GATA4|SMAD6|SALL1|ZFPM2|HEY1	-2.19447	Subtype_1
GO Biological Processes	19	GO:0014706	striated muscle tissue development	-3.94293	5.43501	5.43679	22539	377	88	8	9.09091	3.06454	2353|2626|3131|4209|6943|9242|23414|51176	FOS|GATA4|HLF|MEF2D|TCF21|MSC|ZFPM2|LEF1	-2.19035	Subtype_1
GO Biological Processes	19	GO:0060675	ureteric bud morphogenesis	-3.93829	16.0078	7.52729	22539	64	88	4	4.54545	2.22047	5087|6299|6662|6943	PBX1|SALL1|SOX9|TCF21	-2.18938	Subtype_1
GO Biological Processes	19	GO:1902807	negative regulation of cell cycle G1/S phase transition	-3.93144	10.4969	6.58499	22539	122	88	5	5.68182	2.46774	1820|2146|4869|57472|79733	ARID3A|EZH2|NPM1|CNOT6|E2F8	-2.18496	Subtype_1
GO Biological Processes	19	GO:1902402	signal transduction involved in mitotic DNA damage checkpoint	-3.91199	15.7615	7.46155	22539	65	88	4	4.54545	2.22047	1820|4869|57472|79733	ARID3A|NPM1|CNOT6|E2F8	-2.17512	Subtype_1
GO Biological Processes	19	GO:1902403	signal transduction involved in mitotic DNA integrity checkpoint	-3.91199	15.7615	7.46155	22539	65	88	4	4.54545	2.22047	1820|4869|57472|79733	ARID3A|NPM1|CNOT6|E2F8	-2.17512	Subtype_1
GO Biological Processes	19	GO:0072171	mesonephric tubule morphogenesis	-3.91199	15.7615	7.46155	22539	65	88	4	4.54545	2.22047	5087|6299|6662|6943	PBX1|SALL1|SOX9|TCF21	-2.17512	Subtype_1
GO Biological Processes	19	GO:0072413	signal transduction involved in mitotic cell cycle checkpoint	-3.91199	15.7615	7.46155	22539	65	88	4	4.54545	2.22047	1820|4869|57472|79733	ARID3A|NPM1|CNOT6|E2F8	-2.17512	Subtype_1
Canonical Pathways	11	M32	PID HDAC CLASSIII PATHWAY	-3.90554	30.735	9.31307	22539	25	88	3	3.40909	1.9344	4209|10891|23410	MEF2D|PPARGC1A|SIRT3	-2.17103	Subtype_1
Reactome Gene Sets	6	R-HSA-9013508	NOTCH3 Intracellular Domain Regulates Transcription	-3.90554	30.735	9.31307	22539	25	88	3	3.40909	1.9344	4854|5087|23462	NOTCH3|PBX1|HEY1	-2.17103	Subtype_1
GO Biological Processes	19	GO:0030521	androgen receptor signaling pathway	-3.86069	15.291	7.33435	22539	67	88	4	4.54545	2.22047	367|6943|9970|10891	AR|TCF21|NR1I3|PPARGC1A	-2.13552	Subtype_1
GO Biological Processes	19	GO:0060740	prostate gland epithelium morphogenesis	-3.85352	29.5529	9.12013	22539	26	88	3	3.40909	1.9344	367|2099|6662	AR|ESR1|SOX9	-2.13269	Subtype_1
GO Biological Processes	19	GO:0071103	DNA conformation change	-3.82129	6.11903	5.52175	22539	293	88	7	7.95455	2.88448	1643|4173|4175|4176|4869|6594|6662	DDB2|MCM4|MCM6|MCM7|NPM1|SMARCA1|SOX9	-2.10865	Subtype_1
GO Biological Processes	19	GO:0060411	cardiac septum morphogenesis	-3.811	14.8478	7.2125	22539	69	88	4	4.54545	2.22047	2626|4091|23414|23462	GATA4|SMAD6|ZFPM2|HEY1	-2.10337	Subtype_1
Reactome Gene Sets	6	R-HSA-1368082	RORA activates gene expression	-3.80359	28.4583	8.93779	22539	27	88	3	3.40909	1.9344	6720|9611|10891	SREBF1|NCOR1|PPARGC1A	-2.09887	Subtype_1
GO Biological Processes	19	GO:0001649	osteoblast differentiation	-3.80263	7.45995	5.83137	22539	206	88	6	6.81818	2.68694	3397|4209|8994|10140|23314|51176	ID1|MEF2D|LIMD1|TOB1|SATB2|LEF1	-2.09887	Subtype_1
GO Biological Processes	19	GO:0007568	aging	-3.79409	6.05701	5.48307	22539	296	88	7	7.95455	2.88448	675|2305|2353|4869|6720|10891|23410	BRCA2|FOXM1|FOS|NPM1|SREBF1|PPARGC1A|SIRT3	-2.09358	Subtype_1
GO Biological Processes	19	GO:0031571	mitotic G1 DNA damage checkpoint	-3.76284	14.4296	7.09562	22539	71	88	4	4.54545	2.22047	1820|4869|57472|79733	ARID3A|NPM1|CNOT6|E2F8	-2.07208	Subtype_1
GO Biological Processes	19	GO:0044819	mitotic G1/S transition checkpoint	-3.76284	14.4296	7.09562	22539	71	88	4	4.54545	2.22047	1820|4869|57472|79733	ARID3A|NPM1|CNOT6|E2F8	-2.07208	Subtype_1
GO Biological Processes	19	GO:2000144	positive regulation of DNA-templated transcription, initiation	-3.7556	27.442	8.76509	22539	28	88	3	3.40909	1.9344	2099|3394|10923	ESR1|IRF8|SUB1	-2.06909	Subtype_1
GO Biological Processes	19	GO:0060260	regulation of transcription initiation from RNA polymerase II promoter	-3.7556	27.442	8.76509	22539	28	88	3	3.40909	1.9344	2099|3394|10923	ESR1|IRF8|SUB1	-2.06909	Subtype_1
GO Biological Processes	19	GO:0060512	prostate gland morphogenesis	-3.7556	27.442	8.76509	22539	28	88	3	3.40909	1.9344	367|2099|6662	AR|ESR1|SOX9	-2.06909	Subtype_1
GO Biological Processes	19	GO:0030879	mammary gland development	-3.74036	9.5569	6.21982	22539	134	88	5	5.68182	2.46774	367|675|2099|6662|51176	AR|BRCA2|ESR1|SOX9|LEF1	-2.06014	Subtype_1
GO Biological Processes	19	GO:0044783	G1 DNA damage checkpoint	-3.73931	14.2292	7.03894	22539	72	88	4	4.54545	2.22047	1820|4869|57472|79733	ARID3A|NPM1|CNOT6|E2F8	-2.06013	Subtype_1
GO Biological Processes	19	GO:0072078	nephron tubule morphogenesis	-3.71612	14.0342	6.98338	22539	73	88	4	4.54545	2.22047	5087|6299|6662|6943	PBX1|SALL1|SOX9|TCF21	-2.03902	Subtype_1
GO Biological Processes	19	GO:0032508	DNA duplex unwinding	-3.69328	13.8446	6.9289	22539	74	88	4	4.54545	2.22047	1643|4173|4175|4176	DDB2|MCM4|MCM6|MCM7	-2.02131	Subtype_1
GO Biological Processes	19	GO:0030518	intracellular steroid hormone receptor signaling pathway	-3.68083	9.27989	6.10818	22539	138	88	5	5.68182	2.46774	367|2099|6943|9970|10891	AR|ESR1|TCF21|NR1I3|PPARGC1A	-2.01456	Subtype_1
GO Biological Processes	19	GO:0072006	nephron development	-3.68083	9.27989	6.10818	22539	138	88	5	5.68182	2.46774	4854|5087|6299|6662|6943	NOTCH3|PBX1|SALL1|SOX9|TCF21	-2.01456	Subtype_1
GO Biological Processes	19	GO:0072088	nephron epithelium morphogenesis	-3.67076	13.66	6.87546	22539	75	88	4	4.54545	2.22047	5087|6299|6662|6943	PBX1|SALL1|SOX9|TCF21	-2.00986	Subtype_1
GO Biological Processes	19	GO:0031128	developmental induction	-3.66487	25.6125	8.44538	22539	30	88	3	3.40909	1.9344	367|6299|6662	AR|SALL1|SOX9	-2.00797	Subtype_1
GO Biological Processes	19	GO:0048384	retinoic acid receptor signaling pathway	-3.66487	25.6125	8.44538	22539	30	88	3	3.40909	1.9344	2104|2146|10626	ESRRG|EZH2|TRIM16	-2.00797	Subtype_1
GO Biological Processes	19	GO:0008202	steroid metabolic process	-3.66273	5.76487	5.2974	22539	311	88	7	7.95455	2.88448	2099|5087|6720|8431|8856|10891|23541	ESR1|PBX1|SREBF1|NR0B2|NR1I2|PPARGC1A|SEC14L2	-2.00681	Subtype_1
GO Biological Processes	19	GO:0072073	kidney epithelium development	-3.65178	9.14732	6.05405	22539	140	88	5	5.68182	2.46774	4091|5087|6299|6662|6943	SMAD6|PBX1|SALL1|SOX9|TCF21	-1.99751	Subtype_1
GO Biological Processes	19	GO:0001701	in utero embryonic development	-3.63734	5.70979	5.26171	22539	314	88	7	7.95455	2.88448	367|675|9915|23414|23462|51176|79733	AR|BRCA2|ARNT2|ZFPM2|HEY1|LEF1|E2F8	-1.98826	Subtype_1
GO Biological Processes	19	GO:0007389	pattern specification process	-3.63022	4.89021	5.03233	22539	419	88	8	9.09091	3.06454	367|2626|4091|5087|7289|9355|23314|51176	AR|GATA4|SMAD6|PBX1|TULP3|LHX2|SATB2|LEF1	-1.98308	Subtype_1
GO Biological Processes	19	GO:0072028	nephron morphogenesis	-3.62669	13.3052	6.77159	22539	77	88	4	4.54545	2.22047	5087|6299|6662|6943	PBX1|SALL1|SOX9|TCF21	-1.98147	Subtype_1
GO Biological Processes	19	GO:0061333	renal tubule morphogenesis	-3.62669	13.3052	6.77159	22539	77	88	4	4.54545	2.22047	5087|6299|6662|6943	PBX1|SALL1|SOX9|TCF21	-1.98147	Subtype_1
GO Biological Processes	19	GO:0045930	negative regulation of mitotic cell cycle	-3.62057	5.67366	5.23818	22539	316	88	7	7.95455	2.88448	1820|2146|4869|9232|9319|57472|79733	ARID3A|EZH2|NPM1|PTTG1|TRIP13|CNOT6|E2F8	-1.97776	Subtype_1
GO Biological Processes	19	GO:0072401	signal transduction involved in DNA integrity checkpoint	-3.60512	13.1346	6.72109	22539	78	88	4	4.54545	2.22047	1820|4869|57472|79733	ARID3A|NPM1|CNOT6|E2F8	-1.9694	Subtype_1
GO Biological Processes	19	GO:0072422	signal transduction involved in DNA damage checkpoint	-3.60512	13.1346	6.72109	22539	78	88	4	4.54545	2.22047	1820|4869|57472|79733	ARID3A|NPM1|CNOT6|E2F8	-1.9694	Subtype_1
GO Biological Processes	19	GO:0072395	signal transduction involved in cell cycle checkpoint	-3.58384	12.9684	6.67151	22539	79	88	4	4.54545	2.22047	1820|4869|57472|79733	ARID3A|NPM1|CNOT6|E2F8	-1.95172	Subtype_1
GO Biological Processes	19	GO:0045596	negative regulation of cell differentiation	-3.58039	3.8573	4.67894	22539	664	88	10	11.3636	3.38317	2146|3397|4854|5087|6662|7025|8994|10062|10140|23414	EZH2|ID1|NOTCH3|PBX1|SOX9|NR2F1|LIMD1|NR1H3|TOB1|ZFPM2	-1.95172	Subtype_1
Reactome Gene Sets	6	R-HSA-68962	Activation of the pre-replicative complex	-3.58036	24.0117	8.15542	22539	32	88	3	3.40909	1.9344	4173|4175|4176	MCM4|MCM6|MCM7	-1.95172	Subtype_1
Reactome Gene Sets	6	R-HSA-69190	DNA strand elongation	-3.58036	24.0117	8.15542	22539	32	88	3	3.40909	1.9344	4173|4175|4176	MCM4|MCM6|MCM7	-1.95172	Subtype_1
GO Biological Processes	19	GO:0035107	appendage morphogenesis	-3.54	8.65287	5.8479	22539	148	88	5	5.68182	2.46774	5087|6299|6662|7289|51176	PBX1|SALL1|SOX9|TULP3|LEF1	-1.92178	Subtype_1
GO Biological Processes	19	GO:0035108	limb morphogenesis	-3.54	8.65287	5.8479	22539	148	88	5	5.68182	2.46774	5087|6299|6662|7289|51176	PBX1|SALL1|SOX9|TULP3|LEF1	-1.92178	Subtype_1
Canonical Pathways	11	M2	PID SMAD2 3NUCLEAR PATHWAY	-3.52171	12.4939	6.52799	22539	82	88	4	4.54545	2.22047	367|2099|2353|9611	AR|ESR1|FOS|NCOR1	-1.9071	Subtype_1
GO Biological Processes	19	GO:0003002	regionalization	-3.51455	5.44947	5.08994	22539	329	88	7	7.95455	2.88448	367|2626|4091|5087|7289|9355|51176	AR|GATA4|SMAD6|PBX1|TULP3|LHX2|LEF1	-1.90172	Subtype_1
GO Biological Processes	19	GO:1902893	regulation of pri-miRNA transcription by RNA polymerase II	-3.5013	22.5993	7.89078	22539	34	88	3	3.40909	1.9344	2353|4091|6662	FOS|SMAD6|SOX9	-1.89632	Subtype_1
GO Biological Processes	19	GO:0030856	regulation of epithelial cell differentiation	-3.4998	8.48096	5.77457	22539	151	88	5	5.68182	2.46774	2146|3397|4831|6662|10626	EZH2|ID1|NME2|SOX9|TRIM16	-1.8958	Subtype_1
GO Biological Processes	19	GO:1901991	negative regulation of mitotic cell cycle phase transition	-3.49454	6.53936	5.34421	22539	235	88	6	6.81818	2.68694	1820|2146|4869|9319|57472|79733	ARID3A|EZH2|NPM1|TRIP13|CNOT6|E2F8	-1.89315	Subtype_1
GO Biological Processes	19	GO:0007178	transmembrane receptor protein serine/threonine kinase signaling pathway	-3.48292	5.38401	5.04591	22539	333	88	7	7.95455	2.88448	2353|2626|3397|4091|10140|10923|51176	FOS|GATA4|ID1|SMAD6|TOB1|SUB1|LEF1	-1.88327	Subtype_1
GO Biological Processes	19	GO:0016575	histone deacetylation	-3.44261	11.9128	6.34788	22539	86	88	4	4.54545	2.22047	6299|6720|23410|51317	SALL1|SREBF1|SIRT3|PHF21A	-1.84982	Subtype_1
KEGG Pathway	24	hsa03030	DNA replication	-3.42705	21.3438	7.64792	22539	36	88	3	3.40909	1.9344	4173|4175|4176	MCM4|MCM6|MCM7	-1.84026	Subtype_1
GO Biological Processes	19	GO:0003179	heart valve morphogenesis	-3.42705	21.3438	7.64792	22539	36	88	3	3.40909	1.9344	4091|6662|23462	SMAD6|SOX9|HEY1	-1.84026	Subtype_1
GO Biological Processes	19	GO:0003205	cardiac chamber development	-3.40937	8.10522	5.61109	22539	158	88	5	5.68182	2.46774	2626|4091|6299|23414|23462	GATA4|SMAD6|SALL1|ZFPM2|HEY1	-1.82524	Subtype_1
GO Biological Processes	19	GO:0030509	BMP signaling pathway	-3.40937	8.10522	5.61109	22539	158	88	5	5.68182	2.46774	2626|3397|4091|10140|51176	GATA4|ID1|SMAD6|TOB1|LEF1	-1.82524	Subtype_1
GO Biological Processes	19	GO:0065004	protein-DNA complex assembly	-3.40769	6.29816	5.20951	22539	244	88	6	6.81818	2.68694	1602|1643|2099|4869|6662|6925	DACH1|DDB2|ESR1|NPM1|SOX9|TCF4	-1.825	Subtype_1
GO Biological Processes	19	GO:0071158	positive regulation of cell cycle arrest	-3.40454	11.642	6.26224	22539	88	88	4	4.54545	2.22047	1820|4869|57472|79733	ARID3A|NPM1|CNOT6|E2F8	-1.82268	Subtype_1
GO Biological Processes	19	GO:2000142	regulation of DNA-templated transcription, initiation	-3.39155	20.7669	7.53373	22539	37	88	3	3.40909	1.9344	2099|3394|10923	ESR1|IRF8|SUB1	-1.81382	Subtype_1
Reactome Gene Sets	6	R-HSA-176187	Activation of ATR in response to replication stress	-3.39155	20.7669	7.53373	22539	37	88	3	3.40909	1.9344	4173|4175|4176	MCM4|MCM6|MCM7	-1.81382	Subtype_1
GO Biological Processes	19	GO:0010948	negative regulation of cell cycle process	-3.36819	5.15194	4.8869	22539	348	88	7	7.95455	2.88448	1820|2146|4869|9232|9319|57472|79733	ARID3A|EZH2|NPM1|PTTG1|TRIP13|CNOT6|E2F8	-1.79376	Subtype_1
GO Biological Processes	19	GO:0060021	roof of mouth development	-3.36739	11.3833	6.17932	22539	90	88	4	4.54545	2.22047	6943|9242|23314|51176	TCF21|MSC|SATB2|LEF1	-1.79376	Subtype_1
GO Biological Processes	19	GO:0007519	skeletal muscle tissue development	-3.34747	7.8566	5.50037	22539	163	88	5	5.68182	2.46774	2353|3131|4209|6943|9242	FOS|HLF|MEF2D|TCF21|MSC	-1.77951	Subtype_1
GO Biological Processes	19	GO:0072080	nephron tubule development	-3.33114	11.1359	6.09898	22539	92	88	4	4.54545	2.22047	5087|6299|6662|6943	PBX1|SALL1|SOX9|TCF21	-1.76798	Subtype_1
GO Biological Processes	19	GO:0061614	pri-miRNA transcription by RNA polymerase II	-3.32352	19.7019	7.31827	22539	39	88	3	3.40909	1.9344	2353|4091|6662	FOS|SMAD6|SOX9	-1.76456	Subtype_1
GO Biological Processes	19	GO:0007093	mitotic cell cycle checkpoint	-3.32331	7.76136	5.4574	22539	165	88	5	5.68182	2.46774	1820|4869|9319|57472|79733	ARID3A|NPM1|TRIP13|CNOT6|E2F8	-1.76456	Subtype_1
GO Biological Processes	19	GO:0060993	kidney morphogenesis	-3.31333	11.0161	6.05973	22539	93	88	4	4.54545	2.22047	5087|6299|6662|6943	PBX1|SALL1|SOX9|TCF21	-1.75924	Subtype_1
GO Biological Processes	19	GO:0001568	blood vessel development	-3.31296	3.5672	4.37689	22539	718	88	10	11.3636	3.38317	2626|3397|4091|4854|6943|10553|23414|23462|51176|79733	GATA4|ID1|SMAD6|NOTCH3|TCF21|HTATIP2|ZFPM2|HEY1|LEF1|E2F8	-1.75924	Subtype_1
GO Biological Processes	19	GO:1901988	negative regulation of cell cycle phase transition	-3.30642	6.02647	5.0538	22539	255	88	6	6.81818	2.68694	1820|2146|4869|9319|57472|79733	ARID3A|EZH2|NPM1|TRIP13|CNOT6|E2F8	-1.75426	Subtype_1
GO Biological Processes	19	GO:0061326	renal tubule development	-3.29573	10.8989	6.02107	22539	94	88	4	4.54545	2.22047	5087|6299|6662|6943	PBX1|SALL1|SOX9|TCF21	-1.74743	Subtype_1
GO Biological Processes	19	GO:0003170	heart valve development	-3.29088	19.2094	7.21647	22539	40	88	3	3.40909	1.9344	4091|6662|23462	SMAD6|SOX9|HEY1	-1.74487	Subtype_1
GO Biological Processes	19	GO:0071364	cellular response to epidermal growth factor stimulus	-3.29088	19.2094	7.21647	22539	40	88	3	3.40909	1.9344	3397|4176|6662	ID1|MCM7|SOX9	-1.74487	Subtype_1
GO Biological Processes	19	GO:0051961	negative regulation of nervous system development	-3.28856	5.97957	5.02647	22539	257	88	6	6.81818	2.68694	3397|4854|5087|6662|7025|7289	ID1|NOTCH3|PBX1|SOX9|NR2F1|TULP3	-1.74407	Subtype_1
KEGG Pathway	24	hsa01522	Endocrine resistance	-3.26114	10.6719	5.94548	22539	96	88	4	4.54545	2.22047	2099|2353|4854|9611	ESR1|FOS|NOTCH3|NCOR1	-1.7272	Subtype_1
GO Biological Processes	19	GO:0003197	endocardial cushion development	-3.2591	18.7409	7.11829	22539	41	88	3	3.40909	1.9344	2626|6662|23462	GATA4|SOX9|HEY1	-1.72665	Subtype_1
GO Biological Processes	19	GO:0072210	metanephric nephron development	-3.2591	18.7409	7.11829	22539	41	88	3	3.40909	1.9344	6299|6662|6943	SALL1|SOX9|TCF21	-1.72665	Subtype_1
GO Biological Processes	19	GO:0060538	skeletal muscle organ development	-3.25274	7.48904	5.33268	22539	171	88	5	5.68182	2.46774	2353|3131|4209|6943|9242	FOS|HLF|MEF2D|TCF21|MSC	-1.72103	Subtype_1
GO Biological Processes	19	GO:0030900	forebrain development	-3.23104	4.88522	4.69815	22539	367	88	7	7.95455	2.88448	2146|4854|6299|9355|10891|23314|51176	EZH2|NOTCH3|SALL1|LHX2|PPARGC1A|SATB2|LEF1	-1.70301	Subtype_1
GO Biological Processes	19	GO:0006270	DNA replication initiation	-3.22814	18.2946	7.02352	22539	42	88	3	3.40909	1.9344	4173|4175|4176	MCM4|MCM6|MCM7	-1.70157	Subtype_1
GO Biological Processes	19	GO:0001822	kidney development	-3.21867	5.79906	4.91995	22539	265	88	6	6.81818	2.68694	4091|4854|5087|6299|6662|6943	SMAD6|NOTCH3|PBX1|SALL1|SOX9|TCF21	-1.69485	Subtype_1
GO Biological Processes	19	GO:2000045	regulation of G1/S transition of mitotic cell cycle	-3.2185	7.35991	5.27257	22539	174	88	5	5.68182	2.46774	1820|2146|4869|57472|79733	ARID3A|EZH2|NPM1|CNOT6|E2F8	-1.69485	Subtype_1
GO Biological Processes	19	GO:0060173	limb development	-3.20723	7.31786	5.25285	22539	175	88	5	5.68182	2.46774	5087|6299|6662|7289|51176	PBX1|SALL1|SOX9|TULP3|LEF1	-1.68792	Subtype_1
GO Biological Processes	19	GO:0048736	appendage development	-3.20723	7.31786	5.25285	22539	175	88	5	5.68182	2.46774	5087|6299|6662|7289|51176	PBX1|SALL1|SOX9|TULP3|LEF1	-1.68792	Subtype_1
GO Biological Processes	19	GO:0045668	negative regulation of osteoblast differentiation	-3.19796	17.8692	6.93197	22539	43	88	3	3.40909	1.9344	3397|8994|10140	ID1|LIMD1|TOB1	-1.68065	Subtype_1
GO Biological Processes	19	GO:0001944	vasculature development	-3.19782	3.44717	4.2467	22539	743	88	10	11.3636	3.38317	2626|3397|4091|4854|6943|10553|23414|23462|51176|79733	GATA4|ID1|SMAD6|NOTCH3|TCF21|HTATIP2|ZFPM2|HEY1|LEF1|E2F8	-1.68065	Subtype_1
GO Biological Processes	19	GO:0046545	development of primary female sexual characteristics	-3.17799	10.1436	5.76588	22539	101	88	4	4.54545	2.22047	675|1602|2099|23414	BRCA2|DACH1|ESR1|ZFPM2	-1.66368	Subtype_1
GO Biological Processes	19	GO:0070849	response to epidermal growth factor	-3.16851	17.4631	6.84345	22539	44	88	3	3.40909	1.9344	3397|4176|6662	ID1|MCM7|SOX9	-1.65703	Subtype_1
GO Biological Processes	19	GO:0032570	response to progesterone	-3.16851	17.4631	6.84345	22539	44	88	3	3.40909	1.9344	2353|6720|10062	FOS|SREBF1|NR1H3	-1.65703	Subtype_1
Canonical Pathways	11	M285	PID HNF3A PATHWAY	-3.16851	17.4631	6.84345	22539	44	88	3	3.40909	1.9344	367|2099|2353	AR|ESR1|FOS	-1.65703	Subtype_1
GO Biological Processes	19	GO:0007219	Notch signaling pathway	-3.16288	7.15433	5.1755	22539	179	88	5	5.68182	2.46774	4854|5087|6662|8431|23462	NOTCH3|PBX1|SOX9|NR0B2|HEY1	-1.65211	Subtype_1
GO Biological Processes	19	GO:0072358	cardiovascular system development	-3.16204	3.41045	4.20621	22539	751	88	10	11.3636	3.38317	2626|3397|4091|4854|6943|10553|23414|23462|51176|79733	GATA4|ID1|SMAD6|NOTCH3|TCF21|HTATIP2|ZFPM2|HEY1|LEF1|E2F8	-1.65197	Subtype_1
KEGG Pathway	24	hsa05202	Transcriptional misregulation in cancer	-3.15197	7.11458	5.15654	22539	180	88	5	5.68182	2.46774	4094|5087|6756|9611|9915	MAF|PBX1|SSX1|NCOR1|ARNT2	-1.64471	Subtype_1
GO Biological Processes	19	GO:0072331	signal transduction by p53 class mediator	-3.1512	5.62912	4.8177	22539	273	88	6	6.81818	2.68694	675|1820|2305|4869|57472|79733	BRCA2|ARID3A|FOXM1|NPM1|CNOT6|E2F8	-1.64463	Subtype_1
GO Biological Processes	19	GO:0030857	negative regulation of epithelial cell differentiation	-3.13977	17.075	6.7578	22539	45	88	3	3.40909	1.9344	2146|3397|6662	EZH2|ID1|SOX9	-1.63599	Subtype_1
GO Biological Processes	19	GO:0051129	negative regulation of cellular component organization	-3.12765	3.6882	4.26699	22539	625	88	9	10.2273	3.23006	367|3397|4091|4869|7025|9232|9319|10062|10891	AR|ID1|SMAD6|NPM1|NR2F1|PTTG1|TRIP13|NR1H3|PPARGC1A	-1.6287	Subtype_1
GO Biological Processes	19	GO:0045665	negative regulation of neuron differentiation	-3.109	6.95992	5.0821	22539	184	88	5	5.68182	2.46774	3397|4854|5087|6662|7025	ID1|NOTCH3|PBX1|SOX9|NR2F1	-1.61753	Subtype_1
GO Biological Processes	19	GO:1901699	cellular response to nitrogen compound	-3.10805	3.66475	4.24366	22539	629	88	9	10.2273	3.23006	2099|2146|3397|4869|6662|6720|8462|9611|10891	ESR1|EZH2|ID1|NPM1|SOX9|SREBF1|KLF11|NCOR1|PPARGC1A	-1.61725	Subtype_1
GO Biological Processes	19	GO:0044773	mitotic DNA damage checkpoint	-3.09924	9.66509	5.5984	22539	106	88	4	4.54545	2.22047	1820|4869|57472|79733	ARID3A|NPM1|CNOT6|E2F8	-1.61179	Subtype_1
GO Biological Processes	19	GO:0018205	peptidyl-lysine modification	-3.09561	4.63275	4.51301	22539	387	88	7	7.95455	2.88448	675|2146|10626|10891|23408|23410|51176	BRCA2|EZH2|TRIM16|PPARGC1A|SIRT5|SIRT3|LEF1	-1.61017	Subtype_1
GO Biological Processes	19	GO:0051960	regulation of nervous system development	-3.08766	3.33496	4.12195	22539	768	88	10	11.3636	3.38317	2146|3397|4854|5087|5324|6662|6925|7025|7289|26039	EZH2|ID1|NOTCH3|PBX1|PLAG1|SOX9|TCF4|NR2F1|TULP3|SS18L1	-1.60544	Subtype_1
GO Biological Processes	19	GO:0072001	renal system development	-3.086	5.46886	4.71941	22539	281	88	6	6.81818	2.68694	4091|4854|5087|6299|6662|6943	SMAD6|NOTCH3|PBX1|SALL1|SOX9|TCF21	-1.60544	Subtype_1
Reactome Gene Sets	6	R-HSA-1368108	BMAL1:CLOCK,NPAS2 activates circadian gene expression	-3.08428	16.3484	6.59446	22539	47	88	3	3.40909	1.9344	4783|9611|10891	NFIL3|NCOR1|PPARGC1A	-1.60544	Subtype_1
GO Biological Processes	19	GO:0090329	regulation of DNA-dependent DNA replication	-3.08428	16.3484	6.59446	22539	47	88	3	3.40909	1.9344	675|1602|79733	BRCA2|DACH1|E2F8	-1.60544	Subtype_1
GO Biological Processes	19	GO:2000677	regulation of transcription regulatory region DNA binding	-3.05747	16.0078	6.51651	22539	48	88	3	3.40909	1.9344	3397|9355|23462	ID1|LHX2|HEY1	-1.58578	Subtype_1
GO Biological Processes	19	GO:0048514	blood vessel morphogenesis	-3.05497	3.60176	4.18048	22539	640	88	9	10.2273	3.23006	2626|3397|4854|6943|10553|23414|23462|51176|79733	GATA4|ID1|NOTCH3|TCF21|HTATIP2|ZFPM2|HEY1|LEF1|E2F8	-1.58391	Subtype_1
GO Biological Processes	19	GO:0072009	nephron epithelium development	-3.05391	9.39908	5.50315	22539	109	88	4	4.54545	2.22047	5087|6299|6662|6943	PBX1|SALL1|SOX9|TCF21	-1.58351	Subtype_1
GO Biological Processes	19	GO:0048562	embryonic organ morphogenesis	-3.04635	5.37325	4.65988	22539	286	88	6	6.81818	2.68694	2626|6299|6662|6943|7289|23314	GATA4|SALL1|SOX9|TCF21|TULP3|SATB2	-1.57787	Subtype_1
GO Biological Processes	19	GO:0007517	muscle organ development	-3.0438	4.53892	4.44245	22539	395	88	7	7.95455	2.88448	2353|3131|4209|6943|9242|23414|51176	FOS|HLF|MEF2D|TCF21|MSC|ZFPM2|LEF1	-1.57723	Subtype_1
GO Biological Processes	19	GO:0072132	mesenchyme morphogenesis	-3.03126	15.6811	6.44086	22539	49	88	3	3.40909	1.9344	6662|23462|51176	SOX9|HEY1|LEF1	-1.56786	Subtype_1
Reactome Gene Sets	6	R-HSA-9012852	Signaling by NOTCH3	-3.03126	15.6811	6.44086	22539	49	88	3	3.40909	1.9344	4854|5087|23462	NOTCH3|PBX1|HEY1	-1.56786	Subtype_1
GO Biological Processes	19	GO:1902806	regulation of cell cycle G1/S phase transition	-3.02615	6.66992	4.93968	22539	192	88	5	5.68182	2.46774	1820|2146|4869|57472|79733	ARID3A|EZH2|NPM1|CNOT6|E2F8	-1.56402	Subtype_1
GO Biological Processes	19	GO:0048762	mesenchymal cell differentiation	-3.02615	6.66992	4.93968	22539	192	88	5	5.68182	2.46774	2146|6662|6943|23462|51176	EZH2|SOX9|TCF21|HEY1|LEF1	-1.56402	Subtype_1
GO Biological Processes	19	GO:0044774	mitotic DNA integrity checkpoint	-3.00995	9.14732	5.41152	22539	112	88	4	4.54545	2.22047	1820|4869|57472|79733	ARID3A|NPM1|CNOT6|E2F8	-1.55032	Subtype_1
GO Biological Processes	19	GO:0051101	regulation of DNA binding	-2.98135	8.98684	5.35233	22539	114	88	4	4.54545	2.22047	3397|9355|23462|51176	ID1|LHX2|HEY1|LEF1	-1.52857	Subtype_1
GO Biological Processes	19	GO:0006260	DNA replication	-2.97701	5.20932	4.55615	22539	295	88	6	6.81818	2.68694	675|1602|4173|4175|4176|79733	BRCA2|DACH1|MCM4|MCM6|MCM7|E2F8	-1.52607	Subtype_1
GO Biological Processes	19	GO:0060425	lung morphogenesis	-2.95591	14.7764	6.22665	22539	52	88	3	3.40909	1.9344	3397|6662|6943	ID1|SOX9|TCF21	-1.51093	Subtype_1
KEGG Pathway	24	hsa04919	Thyroid hormone signaling pathway	-2.9533	8.8319	5.29456	22539	116	88	4	4.54545	2.22047	2099|2626|4854|9611	ESR1|GATA4|NOTCH3|NCOR1	-1.51028	Subtype_1
GO Biological Processes	19	GO:0046660	female sex differentiation	-2.9533	8.8319	5.29456	22539	116	88	4	4.54545	2.22047	675|1602|2099|23414	BRCA2|DACH1|ESR1|ZFPM2	-1.51028	Subtype_1
GO Biological Processes	19	GO:0006383	transcription by RNA polymerase III	-2.93183	14.4976	6.15915	22539	53	88	3	3.40909	1.9344	367|10302|55703	AR|SNAPC5|POLR3B	-1.4942	Subtype_1
GO Biological Processes	19	GO:0071363	cellular response to growth factor stimulus	-2.92955	3.45596	4.03108	22539	667	88	9	10.2273	3.23006	2353|2626|3397|4091|4176|6662|10140|10891|51176	FOS|GATA4|ID1|SMAD6|MCM7|SOX9|TOB1|PPARGC1A|LEF1	-1.49251	Subtype_1
GO Biological Processes	19	GO:0007507	heart development	-2.92835	3.82276	4.14092	22539	536	88	8	9.09091	3.06454	2626|3397|4091|4209|6299|6662|23414|23462	GATA4|ID1|SMAD6|MEF2D|SALL1|SOX9|ZFPM2|HEY1	-1.49191	Subtype_1
GO Biological Processes	19	GO:0022612	gland morphogenesis	-2.91222	8.60924	5.21049	22539	119	88	4	4.54545	2.22047	367|2099|5324|6662	AR|ESR1|PLAG1|SOX9	-1.48227	Subtype_1
Reactome Gene Sets	6	R-HSA-1989781	PPARA activates gene expression	-2.91222	8.60924	5.21049	22539	119	88	4	4.54545	2.22047	6720|9611|9915|10891	SREBF1|NCOR1|ARNT2|PPARGC1A	-1.48227	Subtype_1
GO Biological Processes	19	GO:1901990	regulation of mitotic cell cycle phase transition	-2.90768	4.29946	4.25775	22539	417	88	7	7.95455	2.88448	1820|2146|4869|5087|9319|57472|79733	ARID3A|EZH2|NPM1|PBX1|TRIP13|CNOT6|E2F8	-1.47831	Subtype_1
GO Biological Processes	19	GO:0007346	regulation of mitotic cell cycle	-2.90257	3.42515	3.99892	22539	673	88	9	10.2273	3.23006	675|1820|2146|4869|5087|9232|9319|57472|79733	BRCA2|ARID3A|EZH2|NPM1|PBX1|PTTG1|TRIP13|CNOT6|E2F8	-1.47379	Subtype_1
GO Biological Processes	19	GO:0021879	forebrain neuron differentiation	-2.88508	13.9705	6.02949	22539	55	88	3	3.40909	1.9344	6299|23314|51176	SALL1|SATB2|LEF1	-1.46063	Subtype_1
GO Biological Processes	19	GO:0060688	regulation of morphogenesis of a branching structure	-2.88508	13.9705	6.02949	22539	55	88	3	3.40909	1.9344	367|2099|6662	AR|ESR1|SOX9	-1.46063	Subtype_1
GO Biological Processes	19	GO:0050767	regulation of neurogenesis	-2.88477	3.40491	3.97768	22539	677	88	9	10.2273	3.23006	2146|3397|4854|5087|5324|6662|6925|7025|26039	EZH2|ID1|NOTCH3|PBX1|PLAG1|SOX9|TCF4|NR2F1|SS18L1	-1.46063	Subtype_1
Reactome Gene Sets	6	R-HSA-400206	Regulation of lipid metabolism by Peroxisome proliferator-activated receptor alpha (PPARalpha)	-2.87227	8.39754	5.12932	22539	122	88	4	4.54545	2.22047	6720|9611|9915|10891	SREBF1|NCOR1|ARNT2|PPARGC1A	-1.455	Subtype_1
Reactome Gene Sets	6	R-HSA-5617472	Activation of anterior HOX genes in hindbrain development during early embryogenesis	-2.87227	8.39754	5.12932	22539	122	88	4	4.54545	2.22047	2146|5087|9611|57472	EZH2|PBX1|NCOR1|CNOT6	-1.455	Subtype_1
Reactome Gene Sets	6	R-HSA-5619507	Activation of HOX genes during differentiation	-2.87227	8.39754	5.12932	22539	122	88	4	4.54545	2.22047	2146|5087|9611|57472	EZH2|PBX1|NCOR1|CNOT6	-1.455	Subtype_1
GO Biological Processes	19	GO:0001525	angiogenesis	-2.85234	3.71869	4.04505	22539	551	88	8	9.09091	3.06454	2626|3397|4854|6943|10553|23462|51176|79733	GATA4|ID1|NOTCH3|TCF21|HTATIP2|HEY1|LEF1|E2F8	-1.43848	Subtype_1
GO Biological Processes	19	GO:0032355	response to estradiol	-2.84623	8.2621	5.07674	22539	124	88	4	4.54545	2.22047	2099|2146|9915|10891	ESR1|EZH2|ARNT2|PPARGC1A	-1.43518	Subtype_1
KEGG Pathway	24	hsa04110	Cell cycle	-2.84623	8.2621	5.07674	22539	124	88	4	4.54545	2.22047	4173|4175|4176|9232	MCM4|MCM6|MCM7|PTTG1	-1.43518	Subtype_1
GO Biological Processes	19	GO:0003206	cardiac chamber morphogenesis	-2.84623	8.2621	5.07674	22539	124	88	4	4.54545	2.22047	2626|4091|23414|23462	GATA4|SMAD6|ZFPM2|HEY1	-1.43518	Subtype_1
GO Biological Processes	19	GO:2000243	positive regulation of reproductive process	-2.84013	13.4803	5.90643	22539	57	88	3	3.40909	1.9344	367|6662|23414	AR|SOX9|ZFPM2	-1.4302	Subtype_1
Reactome Gene Sets	6	R-HSA-2262752	Cellular responses to stress	-2.8371	4.1792	4.16229	22539	429	88	7	7.95455	2.88448	367|2146|2353|3397|4306|8994|23466	AR|EZH2|FOS|ID1|NR3C2|LIMD1|CBX6	-1.42995	Subtype_1
Reactome Gene Sets	6	R-HSA-157118	Signaling by NOTCH	-2.82066	8.13095	5.02532	22539	126	88	4	4.54545	2.22047	4854|5087|9611|23462	NOTCH3|PBX1|NCOR1|HEY1	-1.41677	Subtype_1
GO Biological Processes	19	GO:0045604	regulation of epidermal cell differentiation	-2.81829	13.2478	5.84719	22539	58	88	3	3.40909	1.9344	2146|4831|10626	EZH2|NME2|TRIM16	-1.41611	Subtype_1
GO Biological Processes	19	GO:0070848	response to growth factor	-2.81061	3.32151	3.88915	22539	694	88	9	10.2273	3.23006	2353|2626|3397|4091|4176|6662|10140|10891|51176	FOS|GATA4|ID1|SMAD6|MCM7|SOX9|TOB1|PPARGC1A|LEF1	-1.40988	Subtype_1
GO Biological Processes	19	GO:0035113	embryonic appendage morphogenesis	-2.80805	8.06693	5.00004	22539	127	88	4	4.54545	2.22047	5087|6299|7289|51176	PBX1|SALL1|TULP3|LEF1	-1.40915	Subtype_1
GO Biological Processes	19	GO:0030326	embryonic limb morphogenesis	-2.80805	8.06693	5.00004	22539	127	88	4	4.54545	2.22047	5087|6299|7289|51176	PBX1|SALL1|TULP3|LEF1	-1.40915	Subtype_1
Canonical Pathways	11	M166	PID ATF2 PATHWAY	-2.79684	13.0233	5.78939	22539	59	88	3	3.40909	1.9344	2099|2353|10891	ESR1|FOS|PPARGC1A	-1.4012	Subtype_1
GO Biological Processes	19	GO:0044786	cell cycle DNA replication	-2.77578	12.8063	5.73298	22539	60	88	3	3.40909	1.9344	675|1602|79733	BRCA2|DACH1|E2F8	-1.38498	Subtype_1
GO Biological Processes	19	GO:0000075	cell cycle checkpoint	-2.77324	5.8476	4.51319	22539	219	88	5	5.68182	2.46774	1820|4869|9319|57472|79733	ARID3A|NPM1|TRIP13|CNOT6|E2F8	-1.38298	Subtype_1
GO Biological Processes	19	GO:0043966	histone H3 acetylation	-2.71481	12.1964	5.57149	22539	63	88	3	3.40909	1.9344	675|10626|51176	BRCA2|TRIM16|LEF1	-1.34234	Subtype_1
GO Biological Processes	19	GO:0043967	histone H4 acetylation	-2.71481	12.1964	5.57149	22539	63	88	3	3.40909	1.9344	675|10626|51176	BRCA2|TRIM16|LEF1	-1.34234	Subtype_1
GO Biological Processes	19	GO:1901987	regulation of cell cycle phase transition	-2.70845	3.96654	3.9887	22539	452	88	7	7.95455	2.88448	1820|2146|4869|5087|9319|57472|79733	ARID3A|EZH2|NPM1|PBX1|TRIP13|CNOT6|E2F8	-1.337	Subtype_1
Canonical Pathways	11	M200	PID ERA GENOMIC PATHWAY	-2.69518	12.0059	5.52008	22539	64	88	3	3.40909	1.9344	2099|8431|9611	ESR1|NR0B2|NCOR1	-1.32882	Subtype_1
GO Biological Processes	19	GO:0046889	positive regulation of lipid biosynthetic process	-2.69518	12.0059	5.52008	22539	64	88	3	3.40909	1.9344	6720|10062|10891	SREBF1|NR1H3|PPARGC1A	-1.32882	Subtype_1
GO Biological Processes	19	GO:0071560	cellular response to transforming growth factor beta stimulus	-2.68036	5.56793	4.35938	22539	230	88	5	5.68182	2.46774	2353|3397|4091|6662|10891	FOS|ID1|SMAD6|SOX9|PPARGC1A	-1.31805	Subtype_1
GO Biological Processes	19	GO:0001837	epithelial to mesenchymal transition	-2.67618	7.42391	4.739	22539	138	88	4	4.54545	2.22047	2146|6662|23462|51176	EZH2|SOX9|HEY1|LEF1	-1.31539	Subtype_1
GO Biological Processes	19	GO:0030858	positive regulation of epithelial cell differentiation	-2.67588	11.8212	5.4698	22539	65	88	3	3.40909	1.9344	4831|6662|10626	NME2|SOX9|TRIM16	-1.31539	Subtype_1
GO Biological Processes	19	GO:0071359	cellular response to dsRNA	-2.65689	11.642	5.4206	22539	66	88	3	3.40909	1.9344	2099|4869|9611	ESR1|NPM1|NCOR1	-1.30397	Subtype_1
GO Biological Processes	19	GO:0021872	forebrain generation of neurons	-2.65689	11.642	5.4206	22539	66	88	3	3.40909	1.9344	6299|23314|51176	SALL1|SATB2|LEF1	-1.30397	Subtype_1
Canonical Pathways	11	M101	PID HDAC CLASSI PATHWAY	-2.65689	11.642	5.4206	22539	66	88	3	3.40909	1.9344	9611|23408|23410	NCOR1|SIRT5|SIRT3	-1.30397	Subtype_1
GO Biological Processes	19	GO:0071559	response to transforming growth factor beta	-2.64787	5.47276	4.30589	22539	234	88	5	5.68182	2.46774	2353|3397|4091|6662|10891	FOS|ID1|SMAD6|SOX9|PPARGC1A	-1.29889	Subtype_1
GO Biological Processes	19	GO:2000241	regulation of reproductive process	-2.64225	7.26596	4.67276	22539	141	88	4	4.54545	2.22047	367|2099|6662|23414	AR|ESR1|SOX9|ZFPM2	-1.29565	Subtype_1
GO Biological Processes	19	GO:0061180	mammary gland epithelium development	-2.63821	11.4683	5.37246	22539	67	88	3	3.40909	1.9344	367|675|2099	AR|BRCA2|ESR1	-1.29258	Subtype_1
Reactome Gene Sets	6	R-HSA-68867	Assembly of the pre-replicative complex	-2.61984	11.2996	5.32533	22539	68	88	3	3.40909	1.9344	4173|4175|4176	MCM4|MCM6|MCM7	-1.27756	Subtype_1
GO Biological Processes	19	GO:0043433	negative regulation of DNA binding transcription factor activity	-2.60912	7.11458	4.60844	22539	144	88	4	4.54545	2.22047	2099|2146|3397|8431	ESR1|EZH2|ID1|NR0B2	-1.27063	Subtype_1
GO Biological Processes	19	GO:0050768	negative regulation of neurogenesis	-2.60815	5.35826	4.24074	22539	239	88	5	5.68182	2.46774	3397|4854|5087|6662|7025	ID1|NOTCH3|PBX1|SOX9|NR2F1	-1.27063	Subtype_1
GO Biological Processes	19	GO:0035914	skeletal muscle cell differentiation	-2.60175	11.1359	5.27916	22539	69	88	3	3.40909	1.9344	2353|3131|4209	FOS|HLF|MEF2D	-1.26481	Subtype_1
GO Biological Processes	19	GO:0003007	heart morphogenesis	-2.60032	5.33594	4.22792	22539	240	88	5	5.68182	2.46774	2626|4091|6662|23414|23462	GATA4|SMAD6|SOX9|ZFPM2|HEY1	-1.26429	Subtype_1
GO Biological Processes	19	GO:0061448	connective tissue development	-2.58478	5.29184	4.20251	22539	242	88	5	5.68182	2.46774	4094|4209|6662|10891|23314	MAF|MEF2D|SOX9|PPARGC1A|SATB2	-1.25104	Subtype_1
Canonical Pathways	11	M167	PID AP1 PATHWAY	-2.58394	10.9768	5.23394	22539	70	88	3	3.40909	1.9344	2099|2353|4094	ESR1|FOS|MAF	-1.2507	Subtype_1
GO Biological Processes	19	GO:0051091	positive regulation of DNA binding transcription factor activity	-2.57707	5.27006	4.18991	22539	243	88	5	5.68182	2.46774	367|2099|4869|10891|11074	AR|ESR1|NPM1|PPARGC1A|TRIM31	-1.24706	Subtype_1
Reactome Gene Sets	6	R-HSA-68949	Orc1 removal from chromatin	-2.56641	10.8222	5.18963	22539	71	88	3	3.40909	1.9344	4173|4175|4176	MCM4|MCM6|MCM7	-1.24231	Subtype_1
Reactome Gene Sets	6	R-HSA-69052	Switching of origins to a post-replicative state	-2.56641	10.8222	5.18963	22539	71	88	3	3.40909	1.9344	4173|4175|4176	MCM4|MCM6|MCM7	-1.24231	Subtype_1
GO Biological Processes	19	GO:0016331	morphogenesis of embryonic epithelium	-2.56615	6.9223	4.52549	22539	148	88	4	4.54545	2.22047	367|6662|7289|9355	AR|SOX9|TULP3|LHX2	-1.24231	Subtype_1
GO Biological Processes	19	GO:0016573	histone acetylation	-2.55561	6.87584	4.50523	22539	149	88	4	4.54545	2.22047	675|10626|10891|51176	BRCA2|TRIM16|PPARGC1A|LEF1	-1.23526	Subtype_1
GO Biological Processes	19	GO:0031334	positive regulation of protein complex assembly	-2.54659	5.18472	4.1402	22539	247	88	5	5.68182	2.46774	1643|2099|3394|10923|57472	DDB2|ESR1|IRF8|SUB1|CNOT6	-1.22805	Subtype_1
Reactome Gene Sets	6	R-HSA-69300	Removal of licensing factors from origins	-2.53214	10.5257	5.10359	22539	73	88	3	3.40909	1.9344	4173|4175|4176	MCM4|MCM6|MCM7	-1.21855	Subtype_1
GO Biological Processes	19	GO:0035019	somatic stem cell population maintenance	-2.53214	10.5257	5.10359	22539	73	88	3	3.40909	1.9344	5087|6299|6662	PBX1|SALL1|SOX9	-1.21855	Subtype_1
GO Biological Processes	19	GO:0003208	cardiac ventricle morphogenesis	-2.51538	10.3834	5.06181	22539	74	88	3	3.40909	1.9344	2626|23414|23462	GATA4|ZFPM2|HEY1	-1.2058	Subtype_1
GO Biological Processes	19	GO:0007050	cell cycle arrest	-2.5093	5.08185	4.07955	22539	252	88	5	5.68182	2.46774	1820|2305|4869|57472|79733	ARID3A|FOXM1|NPM1|CNOT6|E2F8	-1.20194	Subtype_1
GO Biological Processes	19	GO:0000077	DNA damage checkpoint	-2.50409	6.6526	4.40668	22539	154	88	4	4.54545	2.22047	1820|4869|57472|79733	ARID3A|NPM1|CNOT6|E2F8	-1.19805	Subtype_1
GO Biological Processes	19	GO:0018393	internal peptidyl-lysine acetylation	-2.50409	6.6526	4.40668	22539	154	88	4	4.54545	2.22047	675|10626|10891|51176	BRCA2|TRIM16|PPARGC1A|LEF1	-1.19805	Subtype_1
GO Biological Processes	19	GO:0033143	regulation of intracellular steroid hormone receptor signaling pathway	-2.49887	10.245	5.02083	22539	75	88	3	3.40909	1.9344	367|2099|6943	AR|ESR1|TCF21	-1.19371	Subtype_1
GO Biological Processes	19	GO:0045786	negative regulation of cell cycle	-2.49616	3.25755	3.5952	22539	629	88	8	9.09091	3.06454	1820|2146|2305|4869|9232|9319|57472|79733	ARID3A|EZH2|FOXM1|NPM1|PTTG1|TRIP13|CNOT6|E2F8	-1.19231	Subtype_1
GO Biological Processes	19	GO:0051100	negative regulation of binding	-2.49401	6.60968	4.38749	22539	155	88	4	4.54545	2.22047	3397|9355|23462|51176	ID1|LHX2|HEY1|LEF1	-1.19104	Subtype_1
Reactome Gene Sets	6	R-HSA-3700989	Transcriptional Regulation by TP53	-2.48856	4.16463	3.83738	22539	369	88	6	6.81818	2.68694	1643|1820|2353|4869|57472|79733	DDB2|ARID3A|FOS|NPM1|CNOT6|E2F8	-1.18734	Subtype_1
Reactome Gene Sets	6	R-HSA-69304	Regulation of DNA replication	-2.48259	10.1102	4.9806	22539	76	88	3	3.40909	1.9344	4173|4175|4176	MCM4|MCM6|MCM7	-1.18267	Subtype_1
GO Biological Processes	19	GO:0045787	positive regulation of cell cycle	-2.47706	4.14218	3.82064	22539	371	88	6	6.81818	2.68694	675|1820|4869|5087|57472|79733	BRCA2|ARID3A|NPM1|PBX1|CNOT6|E2F8	-1.1793	Subtype_1
GO Biological Processes	19	GO:0098727	maintenance of cell number	-2.47408	6.52548	4.34962	22539	157	88	4	4.54545	2.22047	2146|5087|6299|6662	EZH2|PBX1|SALL1|SOX9	-1.17675	Subtype_1
GO Biological Processes	19	GO:0044089	positive regulation of cellular component biogenesis	-2.46951	3.59294	3.66706	22539	499	88	7	7.95455	2.88448	1643|2099|3394|3397|6662|10923|57472	DDB2|ESR1|IRF8|ID1|SOX9|SUB1|CNOT6	-1.17485	Subtype_1
GO Biological Processes	19	GO:0034502	protein localization to chromosome	-2.45073	9.85096	4.90235	22539	78	88	3	3.40909	1.9344	675|2099|2146	BRCA2|ESR1|EZH2	-1.16152	Subtype_1
GO Biological Processes	19	GO:0006475	internal protein amino acid acetylation	-2.44472	6.40313	4.29404	22539	160	88	4	4.54545	2.22047	675|10626|10891|51176	BRCA2|TRIM16|PPARGC1A|LEF1	-1.15605	Subtype_1
Reactome Gene Sets	6	R-HSA-8953897	Cellular responses to external stimuli	-2.43638	3.54323	3.62248	22539	506	88	7	7.95455	2.88448	367|2146|2353|3397|4306|8994|23466	AR|EZH2|FOS|ID1|NR3C2|LIMD1|CBX6	-1.14929	Subtype_1
Canonical Pathways	11	M66	PID MYC ACTIV PATHWAY	-2.43513	9.72627	4.86428	22539	79	88	3	3.40909	1.9344	4831|4869|5757	NME2|NPM1|PTMA	-1.14881	Subtype_1
GO Biological Processes	19	GO:0018394	peptidyl-lysine acetylation	-2.43507	6.36335	4.27583	22539	161	88	4	4.54545	2.22047	675|10626|10891|51176	BRCA2|TRIM16|PPARGC1A|LEF1	-1.14881	Subtype_1
Canonical Pathways	11	M223	PID BETA CATENIN NUC PATHWAY	-2.41975	9.60469	4.82688	22539	80	88	3	3.40909	1.9344	367|6925|51176	AR|TCF4|LEF1	-1.13726	Subtype_1
GO Biological Processes	19	GO:0045682	regulation of epidermis development	-2.41975	9.60469	4.82688	22539	80	88	3	3.40909	1.9344	2146|4831|10626	EZH2|NME2|TRIM16	-1.13726	Subtype_1
GO Biological Processes	19	GO:0031570	DNA integrity checkpoint	-2.41597	6.28528	4.23986	22539	163	88	4	4.54545	2.22047	1820|4869|57472|79733	ARID3A|NPM1|CNOT6|E2F8	-1.13523	Subtype_1
GO Biological Processes	19	GO:0043044	ATP-dependent chromatin remodeling	-2.40457	9.48611	4.79013	22539	81	88	3	3.40909	1.9344	4869|5757|6594	NPM1|PTMA|SMARCA1	-1.12747	Subtype_1
GO Biological Processes	19	GO:0071466	cellular response to xenobiotic stimulus	-2.39715	6.20909	4.20449	22539	165	88	4	4.54545	2.22047	4176|8856|9915|10891	MCM7|NR1I2|ARNT2|PPARGC1A	-1.12291	Subtype_1
GO Biological Processes	19	GO:0010565	regulation of cellular ketone metabolic process	-2.39715	6.20909	4.20449	22539	165	88	4	4.54545	2.22047	6720|10062|10891|23408	SREBF1|NR1H3|PPARGC1A|SIRT5	-1.12291	Subtype_1
GO Biological Processes	19	GO:0050810	regulation of steroid biosynthetic process	-2.3896	9.37043	4.75401	22539	82	88	3	3.40909	1.9344	6720|10891|23541	SREBF1|PPARGC1A|SEC14L2	-1.1189	Subtype_1
Canonical Pathways	11	M115	PID REG GR PATHWAY	-2.3896	9.37043	4.75401	22539	82	88	3	3.40909	1.9344	2353|5087|9970	FOS|PBX1|NR1I3	-1.1189	Subtype_1
GO Biological Processes	19	GO:0046890	regulation of lipid biosynthetic process	-2.37858	6.13473	4.1697	22539	167	88	4	4.54545	2.22047	6720|10062|10891|23541	SREBF1|NR1H3|PPARGC1A|SEC14L2	-1.11084	Subtype_1
GO Biological Processes	19	GO:0051052	regulation of DNA metabolic process	-2.37148	3.94038	3.66725	22539	390	88	6	6.81818	2.68694	675|1602|2305|4869|10891|79733	BRCA2|DACH1|FOXM1|NPM1|PPARGC1A|E2F8	-1.10615	Subtype_1
GO Biological Processes	19	GO:0019217	regulation of fatty acid metabolic process	-2.36025	9.14732	4.68359	22539	84	88	3	3.40909	1.9344	6720|10062|10891	SREBF1|NR1H3|PPARGC1A	-1.09811	Subtype_1
Reactome Gene Sets	6	R-HSA-381340	Transcriptional regulation of white adipocyte differentiation	-2.36025	9.14732	4.68359	22539	84	88	3	3.40909	1.9344	6720|9611|10891	SREBF1|NCOR1|PPARGC1A	-1.09811	Subtype_1
GO Biological Processes	19	GO:0048661	positive regulation of smooth muscle cell proliferation	-2.36025	9.14732	4.68359	22539	84	88	3	3.40909	1.9344	4209|4854|10891	MEF2D|NOTCH3|PPARGC1A	-1.09811	Subtype_1
GO Biological Processes	19	GO:0090068	positive regulation of cell cycle process	-2.34841	4.65682	3.81988	22539	275	88	5	5.68182	2.46774	1820|4869|5087|57472|79733	ARID3A|NPM1|PBX1|CNOT6|E2F8	-1.08826	Subtype_1
Reactome Gene Sets	6	R-HSA-69002	DNA Replication Pre-Initiation	-2.34586	9.03971	4.64926	22539	85	88	3	3.40909	1.9344	4173|4175|4176	MCM4|MCM6|MCM7	-1.0865	Subtype_1
Reactome Gene Sets	6	R-HSA-68874	M/G1 Transition	-2.34586	9.03971	4.64926	22539	85	88	3	3.40909	1.9344	4173|4175|4176	MCM4|MCM6|MCM7	-1.0865	Subtype_1
GO Biological Processes	19	GO:0021953	central nervous system neuron differentiation	-2.32437	5.92197	4.06863	22539	173	88	4	4.54545	2.22047	6299|7289|23314|51176	SALL1|TULP3|SATB2|LEF1	-1.0709	Subtype_1
GO Biological Processes	19	GO:0010721	negative regulation of cell development	-2.31557	4.57366	3.76722	22539	280	88	5	5.68182	2.46774	3397|4854|5087|6662|7025	ID1|NOTCH3|PBX1|SOX9|NR2F1	-1.06404	Subtype_1
GO Biological Processes	19	GO:0030510	regulation of BMP signaling pathway	-2.2901	8.63343	4.51739	22539	89	88	3	3.40909	1.9344	2626|4091|10140	GATA4|SMAD6|TOB1	-1.04435	Subtype_1
GO Biological Processes	19	GO:0001656	metanephros development	-2.2901	8.63343	4.51739	22539	89	88	3	3.40909	1.9344	6299|6662|6943	SALL1|SOX9|TCF21	-1.04435	Subtype_1
GO Biological Processes	19	GO:0060333	interferon-gamma-mediated signaling pathway	-2.2901	8.63343	4.51739	22539	89	88	3	3.40909	1.9344	3394|10062|11074	IRF8|NR1H3|TRIM31	-1.04435	Subtype_1
GO Biological Processes	19	GO:0050673	epithelial cell proliferation	-2.28744	3.7851	3.54539	22539	406	88	6	6.81818	2.68694	367|675|2099|3397|4831|6662	AR|BRCA2|ESR1|ID1|NME2|SOX9	-1.04208	Subtype_1
GO Biological Processes	19	GO:0060840	artery development	-2.27659	8.5375	4.48571	22539	90	88	3	3.40909	1.9344	4091|4854|23462	SMAD6|NOTCH3|HEY1	-1.03352	Subtype_1
GO Biological Processes	19	GO:0001892	embryonic placenta development	-2.27659	8.5375	4.48571	22539	90	88	3	3.40909	1.9344	23462|51176|79733	HEY1|LEF1|E2F8	-1.03352	Subtype_1
GO Biological Processes	19	GO:0045664	regulation of neuron differentiation	-2.27496	3.30789	3.40497	22539	542	88	7	7.95455	2.88448	3397|4854|5087|6662|6925|7025|26039	ID1|NOTCH3|PBX1|SOX9|TCF4|NR2F1|SS18L1	-1.03265	Subtype_1
GO Biological Processes	19	GO:1901654	response to ketone	-2.25537	5.66022	3.94104	22539	181	88	4	4.54545	2.22047	367|2353|6720|10062	AR|FOS|SREBF1|NR1H3	-1.01533	Subtype_1
KEGG Pathway	24	hsa04658	Th1 and Th2 cell differentiation	-2.25006	8.3519	4.4238	22539	92	88	3	3.40909	1.9344	2353|4094|4854	FOS|MAF|NOTCH3	-1.01155	Subtype_1
GO Biological Processes	19	GO:0009749	response to glucose	-2.23867	5.59836	3.91032	22539	183	88	4	4.54545	2.22047	2626|6720|8431|10891	GATA4|SREBF1|NR0B2|PPARGC1A	-1.00314	Subtype_1
GO Biological Processes	19	GO:0009953	dorsal/ventral pattern formation	-2.23703	8.2621	4.39355	22539	93	88	3	3.40909	1.9344	4091|7289|9355	SMAD6|TULP3|LHX2	-1.00188	Subtype_1
GO Biological Processes	19	GO:0051216	cartilage development	-2.2304	5.56793	3.89514	22539	184	88	4	4.54545	2.22047	4094|4209|6662|23314	MAF|MEF2D|SOX9|SATB2	-0.997482	Subtype_1
GO Biological Processes	19	GO:0006694	steroid biosynthetic process	-2.2304	5.56793	3.89514	22539	184	88	4	4.54545	2.22047	5087|6720|10891|23541	PBX1|SREBF1|PPARGC1A|SEC14L2	-0.997482	Subtype_1
GO Biological Processes	19	GO:0043254	regulation of protein complex assembly	-2.22711	3.67644	3.45799	22539	418	88	6	6.81818	2.68694	1643|2099|3394|4091|10923|57472	DDB2|ESR1|IRF8|SMAD6|SUB1|CNOT6	-0.994568	Subtype_1
GO Biological Processes	19	GO:0050679	positive regulation of epithelial cell proliferation	-2.21401	5.50806	3.86509	22539	186	88	4	4.54545	2.22047	367|3397|4831|6662	AR|ID1|NME2|SOX9	-0.986638	Subtype_1
Reactome Gene Sets	6	R-HSA-1852241	Organelle biogenesis and maintenance	-2.20899	4.31187	3.59704	22539	297	88	5	5.68182	2.46774	4209|9611|10891|23408|23410	MEF2D|NCOR1|PPARGC1A|SIRT5|SIRT3	-0.983449	Subtype_1
GO Biological Processes	19	GO:0008585	female gonad development	-2.19886	8.00391	4.30543	22539	96	88	3	3.40909	1.9344	675|2099|23414	BRCA2|ESR1|ZFPM2	-0.976231	Subtype_1
GO Biological Processes	19	GO:0009746	response to hexose	-2.19783	5.44947	3.83548	22539	188	88	4	4.54545	2.22047	2626|6720|8431|10891	GATA4|SREBF1|NR0B2|PPARGC1A	-0.976007	Subtype_1
GO Biological Processes	19	GO:0006473	protein acetylation	-2.18981	5.42063	3.82083	22539	189	88	4	4.54545	2.22047	675|10626|10891|51176	BRCA2|TRIM16|PPARGC1A|LEF1	-0.972239	Subtype_1
GO Biological Processes	19	GO:0042752	regulation of circadian rhythm	-2.17413	7.84056	4.24879	22539	98	88	3	3.40909	1.9344	2146|10062|10891	EZH2|NR1H3|PPARGC1A	-0.959144	Subtype_1
GO Biological Processes	19	GO:0002062	chondrocyte differentiation	-2.17413	7.84056	4.24879	22539	98	88	3	3.40909	1.9344	4094|4209|6662	MAF|MEF2D|SOX9	-0.959144	Subtype_1
GO Biological Processes	19	GO:0043331	response to dsRNA	-2.17413	7.84056	4.24879	22539	98	88	3	3.40909	1.9344	2099|4869|9611	ESR1|NPM1|NCOR1	-0.959144	Subtype_1
GO Biological Processes	19	GO:0034284	response to monosaccharide	-2.15823	5.30829	3.76327	22539	193	88	4	4.54545	2.22047	2626|6720|8431|10891	GATA4|SREBF1|NR0B2|PPARGC1A	-0.946013	Subtype_1
GO Biological Processes	19	GO:0033044	regulation of chromosome organization	-2.15553	4.18505	3.51204	22539	306	88	5	5.68182	2.46774	6720|9232|9319|10891|11169	SREBF1|PTTG1|TRIP13|PPARGC1A|WDHD1	-0.94437	Subtype_1
GO Biological Processes	19	GO:0001933	negative regulation of protein phosphorylation	-2.15002	3.5409	3.34633	22539	434	88	6	6.81818	2.68694	2305|4091|4869|9611|10891|23410	FOXM1|SMAD6|NPM1|NCOR1|PPARGC1A|SIRT3	-0.940923	Subtype_1
Reactome Gene Sets	6	R-HSA-69239	Synthesis of DNA	-2.14996	7.68375	4.19372	22539	100	88	3	3.40909	1.9344	4173|4175|4176	MCM4|MCM6|MCM7	-0.940923	Subtype_1
Reactome Gene Sets	6	R-HSA-2559583	Cellular Senescence	-2.14273	5.25385	3.73508	22539	195	88	4	4.54545	2.22047	2146|2353|3397|23466	EZH2|FOS|ID1|CBX6	-0.934392	Subtype_1
GO Biological Processes	19	GO:0032526	response to retinoic acid	-2.1147	7.45995	4.11392	22539	103	88	3	3.40909	1.9344	6662|6720|10626	SOX9|SREBF1|TRIM16	-0.913452	Subtype_1
GO Biological Processes	19	GO:0009952	anterior/posterior pattern specification	-2.0899	5.07178	3.63939	22539	202	88	4	4.54545	2.22047	2626|5087|7289|51176	GATA4|PBX1|TULP3|LEF1	-0.896075	Subtype_1
GO Biological Processes	19	GO:0044283	small molecule biosynthetic process	-2.07324	2.76146	3.05461	22539	742	88	8	9.09091	3.06454	4831|5092|6720|9611|10062|10891|23408|23541	NME2|PCBD1|SREBF1|NCOR1|NR1H3|PPARGC1A|SIRT5|SEC14L2	-0.883141	Subtype_1
GO Biological Processes	19	GO:0060964	regulation of gene silencing by miRNA	-2.06942	7.18107	4.01239	22539	107	88	3	3.40909	1.9344	2099|8994|9611	ESR1|LIMD1|NCOR1	-0.880325	Subtype_1
KEGG Pathway	24	hsa04931	Insulin resistance	-2.06942	7.18107	4.01239	22539	107	88	3	3.40909	1.9344	6720|10062|10891	SREBF1|NR1H3|PPARGC1A	-0.880325	Subtype_1
GO Biological Processes	19	GO:0002064	epithelial cell development	-2.06791	4.99756	3.59973	22539	205	88	4	4.54545	2.22047	367|2099|3397|6662	AR|ESR1|ID1|SOX9	-0.879493	Subtype_1
Reactome Gene Sets	6	R-HSA-69306	DNA Replication	-2.05839	7.11458	3.98782	22539	108	88	3	3.40909	1.9344	4173|4175|4176	MCM4|MCM6|MCM7	-0.870978	Subtype_1
GO Biological Processes	19	GO:0019218	regulation of steroid metabolic process	-2.05839	7.11458	3.98782	22539	108	88	3	3.40909	1.9344	6720|10891|23541	SREBF1|PPARGC1A|SEC14L2	-0.870978	Subtype_1
GO Biological Processes	19	GO:0060560	developmental growth involved in morphogenesis	-2.05347	4.94928	3.57372	22539	207	88	4	4.54545	2.22047	2099|6299|6662|9355	ESR1|SALL1|SOX9|LHX2	-0.867054	Subtype_1
GO Biological Processes	19	GO:0007569	cell aging	-2.04748	7.04931	3.96356	22539	109	88	3	3.40909	1.9344	675|2305|4869	BRCA2|FOXM1|NPM1	-0.863243	Subtype_1
GO Biological Processes	19	GO:0033002	muscle cell proliferation	-2.03918	4.90191	3.54803	22539	209	88	4	4.54545	2.22047	4209|4854|10891|23414	MEF2D|NOTCH3|PPARGC1A|ZFPM2	-0.85643	Subtype_1
GO Biological Processes	19	GO:0048705	skeletal system morphogenesis	-2.03918	4.90191	3.54803	22539	209	88	4	4.54545	2.22047	4209|6662|7289|23314	MEF2D|SOX9|TULP3|SATB2	-0.85643	Subtype_1
GO Biological Processes	19	GO:0060966	regulation of gene silencing by RNA	-2.02599	6.9223	3.91595	22539	111	88	3	3.40909	1.9344	2099|8994|9611	ESR1|LIMD1|NCOR1	-0.846539	Subtype_1
GO Biological Processes	19	GO:0060147	regulation of posttranscriptional gene silencing	-2.02599	6.9223	3.91595	22539	111	88	3	3.40909	1.9344	2099|8994|9611	ESR1|LIMD1|NCOR1	-0.846539	Subtype_1
GO Biological Processes	19	GO:0045444	fat cell differentiation	-2.02506	4.85545	3.52268	22539	211	88	4	4.54545	2.22047	4091|6720|10891|23414	SMAD6|SREBF1|PPARGC1A|ZFPM2	-0.845936	Subtype_1
GO Biological Processes	19	GO:0009743	response to carbohydrate	-2.00417	4.78738	3.48523	22539	214	88	4	4.54545	2.22047	2626|6720|8431|10891	GATA4|SREBF1|NR0B2|PPARGC1A	-0.828544	Subtype_1
GO Biological Processes	19	GO:0000122	negative regulation of transcription by RNA polymerase II	-21.1468	10.6648	15.9679	22539	789	75	28	37.3333	5.58517	142|165|367|688|1831|2023|2099|2146|2305|3065|3066|3068|4602|4782|6097|6299|7020|7703|7704|8431|8462|9603|9971|29842|51085|53335|79733|128553	PARP1|AEBP1|AR|KLF5|TSC22D3|ENO1|ESR1|EZH2|FOXM1|HDAC1|HDAC2|HDGF|MYB|NFIC|RORC|SALL1|TFAP2A|PCGF2|ZBTB16|NR0B2|KLF11|NFE2L3|NR1H4|TFCP2L1|MLXIPL|BCL11A|E2F8|TSHZ2	-17.3236	Subtype_2
GO Biological Processes	19	GO:0071396	cellular response to lipid	-13.6277	10.0703	12.6394	22539	567	75	19	25.3333	5.02203	142|367|672|687|2099|3065|3066|3148|4306|4602|6095|6097|6602|8431|8805|8856|9970|9971|10891	PARP1|AR|BRCA1|KLF9|ESR1|HDAC1|HDAC2|HMGB2|NR3C2|MYB|RORA|RORC|SMARCD1|NR0B2|TRIM24|NR1I2|NR1I3|NR1H4|PPARGC1A	-10.2816	Subtype_2
GO Biological Processes	19	GO:0006367	transcription initiation from RNA polymerase II promoter	-13.3596	21.0041	15.8289	22539	186	75	13	17.3333	4.37095	367|1871|2099|4306|5433|6095|6097|7004|8431|8856|9970|9971|10891	AR|E2F3|ESR1|NR3C2|POLR2D|RORA|RORC|TEAD4|NR0B2|NR1I2|NR1I3|NR1H4|PPARGC1A	-10.1007	Subtype_2
GO Biological Processes	19	GO:0043401	steroid hormone mediated signaling pathway	-13.2105	20.4542	15.6011	22539	191	75	13	17.3333	4.37095	142|367|672|2099|3065|4306|6095|6097|8431|8856|9970|9971|10891	PARP1|AR|BRCA1|ESR1|HDAC1|NR3C2|RORA|RORC|NR0B2|NR1I2|NR1I3|NR1H4|PPARGC1A	-9.98928	Subtype_2
Reactome Gene Sets	6	R-HSA-383280	Nuclear Receptor transcription pathway	-13.1651	54.0936	21.7164	22539	50	75	9	12	3.75233	367|2099|4306|6095|6097|8431|8856|9970|9971	AR|ESR1|NR3C2|RORA|RORC|NR0B2|NR1I2|NR1I3|NR1H4	-9.9787	Subtype_2
GO Biological Processes	19	GO:0071383	cellular response to steroid hormone stimulus	-12.853	16.3073	14.2885	22539	258	75	14	18.6667	4.49922	142|367|672|687|2099|3065|4306|6095|6097|8431|8856|9970|9971|10891	PARP1|AR|BRCA1|KLF9|ESR1|HDAC1|NR3C2|RORA|RORC|NR0B2|NR1I2|NR1I3|NR1H4|PPARGC1A	-9.69882	Subtype_2
GO Biological Processes	19	GO:0071407	cellular response to organic cyclic compound	-12.4754	9.50678	11.8755	22539	569	75	18	24	4.93153	142|367|672|687|688|2099|2146|3065|3066|4306|6095|6097|8431|8805|8856|9970|9971|10891	PARP1|AR|BRCA1|KLF9|KLF5|ESR1|EZH2|HDAC1|HDAC2|NR3C2|RORA|RORC|NR0B2|TRIM24|NR1I2|NR1I3|NR1H4|PPARGC1A	-9.45381	Subtype_2
GO Biological Processes	19	GO:0009755	hormone-mediated signaling pathway	-12.1257	16.8395	14.0123	22539	232	75	13	17.3333	4.37095	142|367|672|2099|3065|4306|6095|6097|8431|8856|9970|9971|10891	PARP1|AR|BRCA1|ESR1|HDAC1|NR3C2|RORA|RORC|NR0B2|NR1I2|NR1I3|NR1H4|PPARGC1A	-9.14758	Subtype_2
GO Biological Processes	19	GO:0006352	DNA-templated transcription, initiation	-11.9152	16.2106	13.7173	22539	241	75	13	17.3333	4.37095	367|1871|2099|4306|5433|6095|6097|7004|8431|8856|9970|9971|10891	AR|E2F3|ESR1|NR3C2|POLR2D|RORA|RORC|TEAD4|NR0B2|NR1I2|NR1I3|NR1H4|PPARGC1A	-8.95731	Subtype_2
GO Biological Processes	19	GO:0048545	response to steroid hormone	-11.6121	11.5882	12.1718	22539	389	75	15	20	4.6188	142|367|672|687|2099|3065|3148|4306|6095|6097|8431|8856|9970|9971|10891	PARP1|AR|BRCA1|KLF9|ESR1|HDAC1|HMGB2|NR3C2|RORA|RORC|NR0B2|NR1I2|NR1I3|NR1H4|PPARGC1A	-8.69193	Subtype_2
GO Biological Processes	19	GO:0030522	intracellular receptor signaling pathway	-10.9953	13.7079	12.4749	22539	285	75	13	17.3333	4.37095	142|367|672|2099|2146|3065|6095|6097|8805|8856|9970|9971|10891	PARP1|AR|BRCA1|ESR1|EZH2|HDAC1|RORA|RORC|TRIM24|NR1I2|NR1I3|NR1H4|PPARGC1A	-8.10992	Subtype_2
GO Biological Processes	19	GO:0006325	chromatin organization	-8.39139	6.22034	8.53382	22539	773	75	16	21.3333	4.73036	672|2099|2146|3065|3066|3148|3159|4171|4602|6299|6602|7703|9971|10891|11108|51317	BRCA1|ESR1|EZH2|HDAC1|HDAC2|HMGB2|HMGA1|MCM2|MYB|SALL1|SMARCD1|PCGF2|NR1H4|PPARGC1A|PRDM4|PHF21A	-5.65923	Subtype_2
CORUM	33	CORUM:2814	BRCA1-HDAC1-HDAC2 complex	-7.45113	300.52	29.9773	22539	3	75	3	4	2.26274	672|3065|3066	BRCA1|HDAC1|HDAC2	-4.79423	Subtype_2
GO Biological Processes	19	GO:0032870	cellular response to hormone stimulus	-7.27041	6.11523	7.87352	22539	688	75	14	18.6667	4.49922	142|367|672|687|2099|3065|4306|6095|6097|8431|8856|9970|9971|10891	PARP1|AR|BRCA1|KLF9|ESR1|HDAC1|NR3C2|RORA|RORC|NR0B2|NR1I2|NR1I3|NR1H4|PPARGC1A	-4.63281	Subtype_2
GO Biological Processes	19	GO:0048736	appendage development	-6.91405	13.7381	9.77445	22539	175	75	8	10.6667	3.56443	3065|3066|4223|5307|6299|6659|7020|7704	HDAC1|HDAC2|MEOX2|PITX1|SALL1|SOX4|TFAP2A|ZBTB16	-4.37712	Subtype_2
GO Biological Processes	19	GO:0060173	limb development	-6.91405	13.7381	9.77445	22539	175	75	8	10.6667	3.56443	3065|3066|4223|5307|6299|6659|7020|7704	HDAC1|HDAC2|MEOX2|PITX1|SALL1|SOX4|TFAP2A|ZBTB16	-4.37712	Subtype_2
GO Biological Processes	19	GO:0016570	histone modification	-6.60711	7.42858	7.91413	22539	445	75	11	14.6667	4.08502	672|2146|3065|3066|4602|6299|7703|9971|10891|11108|51317	BRCA1|EZH2|HDAC1|HDAC2|MYB|SALL1|PCGF2|NR1H4|PPARGC1A|PRDM4|PHF21A	-4.11967	Subtype_2
GO Biological Processes	19	GO:0016569	covalent chromatin modification	-6.5344	6.4744	7.55919	22539	557	75	12	16	4.2332	672|2146|3065|3066|4602|6299|6602|7703|9971|10891|11108|51317	BRCA1|EZH2|HDAC1|HDAC2|MYB|SALL1|SMARCD1|PCGF2|NR1H4|PPARGC1A|PRDM4|PHF21A	-4.06012	Subtype_2
GO Biological Processes	19	GO:0072331	signal transduction by p53 class mediator	-6.51233	9.90725	8.55557	22539	273	75	9	12	3.75233	580|672|1820|2305|3065|3066|6659|8805|79733	BARD1|BRCA1|ARID3A|FOXM1|HDAC1|HDAC2|SOX4|TRIM24|E2F8	-4.04448	Subtype_2
GO Biological Processes	19	GO:0032392	DNA geometric change	-6.43594	21.4657	10.8581	22539	84	75	6	8	3.13262	142|2547|3148|3159|4171|4175	PARP1|XRCC6|HMGB2|HMGA1|MCM2|MCM6	-3.97444	Subtype_2
GO Biological Processes	19	GO:0030518	intracellular steroid hormone receptor signaling pathway	-6.41081	15.2438	9.69785	22539	138	75	7	9.33333	3.35901	142|367|672|2099|3065|9970|10891	PARP1|AR|BRCA1|ESR1|HDAC1|NR1I3|PPARGC1A	-3.95555	Subtype_2
GO Biological Processes	19	GO:0035107	appendage morphogenesis	-6.205	14.2138	9.31893	22539	148	75	7	9.33333	3.35901	3065|3066|5307|6299|6659|7020|7704	HDAC1|HDAC2|PITX1|SALL1|SOX4|TFAP2A|ZBTB16	-3.77971	Subtype_2
GO Biological Processes	19	GO:0035108	limb morphogenesis	-6.205	14.2138	9.31893	22539	148	75	7	9.33333	3.35901	3065|3066|5307|6299|6659|7020|7704	HDAC1|HDAC2|PITX1|SALL1|SOX4|TFAP2A|ZBTB16	-3.77971	Subtype_2
CORUM	33	CORUM:636	BHC complex	-6.15323	150.26	21.1278	22539	6	75	3	4	2.26274	3065|3066|51317	HDAC1|HDAC2|PHF21A	-3.73936	Subtype_2
Reactome Gene Sets	6	R-HSA-193670	p75NTR negatively regulates cell cycle via SC1	-6.15323	150.26	21.1278	22539	6	75	3	4	2.26274	3065|3066|11108	HDAC1|HDAC2|PRDM4	-3.73936	Subtype_2
GO Biological Processes	19	GO:0008285	negative regulation of cell proliferation	-6.14581	5.38863	6.94026	22539	725	75	13	17.3333	4.37095	367|687|1871|3065|3159|4091|6659|7020|7704|8462|8805|10140|10891	AR|KLF9|E2F3|HDAC1|HMGA1|SMAD6|SOX4|TFAP2A|ZBTB16|KLF11|TRIM24|TOB1|PPARGC1A	-3.73754	Subtype_2
GO Biological Processes	19	GO:0006383	transcription by RNA polymerase III	-6.04443	28.3509	11.5186	22539	53	75	5	6.66667	2.88033	367|672|2976|10623|10625	AR|BRCA1|GTF3C2|POLR3C|IVNS1ABP	-3.65298	Subtype_2
GO Biological Processes	19	GO:0008202	steroid metabolic process	-6.03953	8.69672	7.89733	22539	311	75	9	12	3.75233	2099|6095|6097|8431|8856|9971|10891|23541|29842	ESR1|RORA|RORC|NR0B2|NR1I2|NR1H4|PPARGC1A|SEC14L2|TFCP2L1	-3.65298	Subtype_2
GO Biological Processes	19	GO:0048511	rhythmic process	-6.02796	8.66885	7.88155	22539	312	75	9	12	3.75233	687|2099|2146|3065|3066|3131|6095|6097|10891	KLF9|ESR1|EZH2|HDAC1|HDAC2|HLF|RORA|RORC|PPARGC1A	-3.64669	Subtype_2
GO Biological Processes	19	GO:0032922	circadian regulation of gene expression	-5.96308	27.32	11.2921	22539	55	75	5	6.66667	2.88033	3065|3066|6095|6097|10891	HDAC1|HDAC2|RORA|RORC|PPARGC1A	-3.59215	Subtype_2
CORUM	33	CORUM:620	CoREST-HDAC complex	-5.91123	128.794	19.5391	22539	7	75	3	4	2.26274	3065|3066|51317	HDAC1|HDAC2|PHF21A	-3.56512	Subtype_2
CORUM	33	CORUM:871	BRAF53-BRCA2 complex	-5.91123	128.794	19.5391	22539	7	75	3	4	2.26274	3065|3066|51317	HDAC1|HDAC2|PHF21A	-3.56512	Subtype_2
GO Biological Processes	19	GO:2000756	regulation of peptidyl-lysine acetylation	-5.73679	24.6328	10.6794	22539	61	75	5	6.66667	2.88033	672|3065|3066|6659|10891	BRCA1|HDAC1|HDAC2|SOX4|PPARGC1A	-3.40957	Subtype_2
GO Biological Processes	19	GO:0006268	DNA unwinding involved in DNA replication	-5.70815	112.695	18.2572	22539	8	75	3	4	2.26274	3159|4171|4175	HMGA1|MCM2|MCM6	-3.39902	Subtype_2
GO Biological Processes	19	GO:0010942	positive regulation of cell death	-5.69837	5.39049	6.66111	22539	669	75	12	16	4.2332	142|580|1871|3065|3202|4602|6659|7020|7704|8462|10891|10921	PARP1|BARD1|E2F3|HDAC1|HOXA5|MYB|SOX4|TFAP2A|ZBTB16|KLF11|PPARGC1A|RNPS1	-3.39801	Subtype_2
GO Biological Processes	19	GO:0071156	regulation of cell cycle arrest	-5.6755	15.9568	9.20974	22539	113	75	6	8	3.13262	672|1820|2305|6659|51085|79733	BRCA1|ARID3A|FOXM1|SOX4|MLXIPL|E2F8	-3.38579	Subtype_2
GO Biological Processes	19	GO:0010948	negative regulation of cell cycle process	-5.63729	7.77207	7.35643	22539	348	75	9	12	3.75233	672|1820|2146|6659|7703|9232|9319|51085|79733	BRCA1|ARID3A|EZH2|SOX4|PCGF2|PTTG1|TRIP13|MLXIPL|E2F8	-3.37036	Subtype_2
GO Biological Processes	19	GO:0030521	androgen receptor signaling pathway	-5.53312	22.4269	10.1489	22539	67	75	5	6.66667	2.88033	367|672|3065|9970|10891	AR|BRCA1|HDAC1|NR1I3|PPARGC1A	-3.29346	Subtype_2
KEGG Pathway	24	hsa04110	Cell cycle	-5.44069	14.5413	8.73668	22539	124	75	6	8	3.13262	1871|3065|3066|4171|4175|9232	E2F3|HDAC1|HDAC2|MCM2|MCM6|PTTG1	-3.22788	Subtype_2
GO Biological Processes	19	GO:1901983	regulation of protein acetylation	-5.43846	21.4657	9.90898	22539	70	75	5	6.66667	2.88033	672|3065|3066|6659|10891	BRCA1|HDAC1|HDAC2|SOX4|PPARGC1A	-3.22788	Subtype_2
Reactome Gene Sets	6	R-HSA-3108232	SUMO E3 ligases SUMOylate target proteins	-5.42047	14.425	8.69667	22539	125	75	6	8	3.13262	142|672|3065|3066|7020|7703	PARP1|BRCA1|HDAC1|HDAC2|TFAP2A|PCGF2	-3.22002	Subtype_2
GO Biological Processes	19	GO:0007623	circadian rhythm	-5.42001	10.8435	7.95619	22539	194	75	7	9.33333	3.35901	687|2146|3065|3066|6095|6097|10891	KLF9|EZH2|HDAC1|HDAC2|RORA|RORC|PPARGC1A	-3.22002	Subtype_2
GO Biological Processes	19	GO:0030326	embryonic limb morphogenesis	-5.38054	14.1978	8.61802	22539	127	75	6	8	3.13262	3065|3066|5307|6299|7020|7704	HDAC1|HDAC2|PITX1|SALL1|TFAP2A|ZBTB16	-3.20273	Subtype_2
GO Biological Processes	19	GO:0035113	embryonic appendage morphogenesis	-5.38054	14.1978	8.61802	22539	127	75	6	8	3.13262	3065|3066|5307|6299|7020|7704	HDAC1|HDAC2|PITX1|SALL1|TFAP2A|ZBTB16	-3.20273	Subtype_2
CORUM	33	CORUM:1492	BHC110 complex	-5.37924	90.156	16.2939	22539	10	75	3	4	2.26274	3065|3066|51317	HDAC1|HDAC2|PHF21A	-3.20273	Subtype_2
GO Biological Processes	19	GO:0032508	DNA duplex unwinding	-5.31879	20.3054	9.61139	22539	74	75	5	6.66667	2.88033	142|2547|3159|4171|4175	PARP1|XRCC6|HMGA1|MCM2|MCM6	-3.15831	Subtype_2
Reactome Gene Sets	6	R-HSA-2990846	SUMOylation	-5.30268	13.7643	8.46594	22539	131	75	6	8	3.13262	142|672|3065|3066|7020|7703	PARP1|BRCA1|HDAC1|HDAC2|TFAP2A|PCGF2	-3.14845	Subtype_2
GO Biological Processes	19	GO:0033143	regulation of intracellular steroid hormone receptor signaling pathway	-5.28995	20.0347	9.54063	22539	75	75	5	6.66667	2.88033	142|367|672|2099|3065	PARP1|AR|BRCA1|ESR1|HDAC1	-3.13881	Subtype_2
GO Biological Processes	19	GO:0018205	peptidyl-lysine modification	-5.2624	6.98884	6.86651	22539	387	75	9	12	3.75233	672|2146|3065|3066|4602|6659|7703|10891|53335	BRCA1|EZH2|HDAC1|HDAC2|MYB|SOX4|PCGF2|PPARGC1A|BCL11A	-3.11738	Subtype_2
CORUM	33	CORUM:633	anti-BHC110 complex	-5.24198	81.96	15.5185	22539	11	75	3	4	2.26274	3065|3066|51317	HDAC1|HDAC2|PHF21A	-3.10498	Subtype_2
GO Biological Processes	19	GO:0010870	positive regulation of receptor biosynthetic process	-5.24198	81.96	15.5185	22539	11	75	3	4	2.26274	3065|3066|3202	HDAC1|HDAC2|HOXA5	-3.10498	Subtype_2
GO Biological Processes	19	GO:0043065	positive regulation of apoptotic process	-5.24098	5.37515	6.35647	22539	615	75	11	14.6667	4.08502	580|1871|3065|3202|4602|6659|7020|7704|8462|10891|10921	BARD1|E2F3|HDAC1|HOXA5|MYB|SOX4|TFAP2A|ZBTB16|KLF11|PPARGC1A|RNPS1	-3.10498	Subtype_2
GO Biological Processes	19	GO:0006260	DNA replication	-5.20893	8.14969	7.14228	22539	295	75	8	10.6667	3.56443	142|580|672|3159|4171|4175|4782|79733	PARP1|BARD1|BRCA1|HMGA1|MCM2|MCM6|NFIC|E2F8	-3.08176	Subtype_2
GO Biological Processes	19	GO:0043068	positive regulation of programmed cell death	-5.2011	5.32322	6.31244	22539	621	75	11	14.6667	4.08502	580|1871|3065|3202|4602|6659|7020|7704|8462|10891|10921	BARD1|E2F3|HDAC1|HOXA5|MYB|SOX4|TFAP2A|ZBTB16|KLF11|PPARGC1A|RNPS1	-3.07683	Subtype_2
GO Biological Processes	19	GO:0045786	negative regulation of cell cycle	-5.14862	5.25552	6.25462	22539	629	75	11	14.6667	4.08502	580|672|1820|2146|2305|6659|7703|9232|9319|51085|79733	BARD1|BRCA1|ARID3A|EZH2|FOXM1|SOX4|PCGF2|PTTG1|TRIP13|MLXIPL|E2F8	-3.04139	Subtype_2
GO Biological Processes	19	GO:0030855	epithelial cell differentiation	-5.12087	4.7326	6.05668	22539	762	75	12	16	4.2332	367|688|1999|2099|2146|3065|3066|3202|6299|6659|29842|79733	AR|KLF5|ELF3|ESR1|EZH2|HDAC1|HDAC2|HOXA5|SALL1|SOX4|TFCP2L1|E2F8	-3.02464	Subtype_2
GO Biological Processes	19	GO:0061061	muscle structure development	-5.08414	5.17327	6.18372	22539	639	75	11	14.6667	4.08502	165|688|1831|2146|3065|3131|4223|5307|6095|6938|7004	AEBP1|KLF5|TSC22D3|EZH2|HDAC1|HLF|MEOX2|PITX1|RORA|TCF12|TEAD4	-3.00126	Subtype_2
GO Biological Processes	19	GO:0033146	regulation of intracellular estrogen receptor signaling pathway	-5.06985	30.8226	10.7704	22539	39	75	4	5.33333	2.59458	142|367|672|2099	PARP1|AR|BRCA1|ESR1	-2.99221	Subtype_2
GO Biological Processes	19	GO:0061029	eyelid development in camera-type eye	-5.00518	69.3508	14.2435	22539	13	75	3	4	2.26274	3065|3066|7020	HDAC1|HDAC2|TFAP2A	-2.94287	Subtype_2
GO Biological Processes	19	GO:0006281	DNA repair	-5.00002	5.67019	6.28662	22539	530	75	10	13.3333	3.92523	142|580|672|2305|2547|3148|3159|5433|9232|9319	PARP1|BARD1|BRCA1|FOXM1|XRCC6|HMGB2|HMGA1|POLR2D|PTTG1|TRIP13	-2.94054	Subtype_2
GO Biological Processes	19	GO:0048732	gland development	-4.96089	6.40919	6.48142	22539	422	75	9	12	3.75233	367|1999|2099|2146|3202|5307|6299|29842|79733	AR|ELF3|ESR1|EZH2|HOXA5|PITX1|SALL1|TFCP2L1|E2F8	-2.90604	Subtype_2
Canonical Pathways	11	M285	PID HNF3A PATHWAY	-4.85771	27.32	10.0975	22539	44	75	4	5.33333	2.59458	367|672|2099|4782	AR|BRCA1|ESR1|NFIC	-2.82218	Subtype_2
CORUM	33	CORUM:714	BRM-SIN3A complex	-4.80561	60.104	13.2308	22539	15	75	3	4	2.26274	3065|3066|6602	HDAC1|HDAC2|SMARCD1	-2.79529	Subtype_2
GO Biological Processes	19	GO:0044772	mitotic cell cycle phase transition	-4.79341	5.36643	6.0459	22539	560	75	10	13.3333	3.92523	672|1820|2146|2305|4171|4175|6659|8462|9319|79733	BRCA1|ARID3A|EZH2|FOXM1|MCM2|MCM6|SOX4|KLF11|TRIP13|E2F8	-2.79114	Subtype_2
GO Biological Processes	19	GO:0018394	peptidyl-lysine acetylation	-4.79	11.1995	7.50457	22539	161	75	6	8	3.13262	672|3065|3066|6659|7703|10891	BRCA1|HDAC1|HDAC2|SOX4|PCGF2|PPARGC1A	-2.79114	Subtype_2
GO Biological Processes	19	GO:0043009	chordate embryonic development	-4.7801	5.34733	6.03047	22539	562	75	10	13.3333	3.92523	367|672|1999|3202|4223|6659|7020|7703|7942|79733	AR|BRCA1|ELF3|HOXA5|MEOX2|SOX4|TFAP2A|PCGF2|TFEB|E2F8	-2.78509	Subtype_2
GO Biological Processes	19	GO:0035690	cellular response to drug	-4.73453	7.00921	6.47996	22539	343	75	8	10.6667	3.56443	672|687|2146|3066|4602|7703|10891|53335	BRCA1|KLF9|EZH2|HDAC2|MYB|PCGF2|PPARGC1A|BCL11A	-2.74593	Subtype_2
CORUM	33	CORUM:739	SIN3-ING1b complex II	-4.71648	56.3475	12.7965	22539	16	75	3	4	2.26274	3065|3066|6602	HDAC1|HDAC2|SMARCD1	-2.73036	Subtype_2
GO Biological Processes	19	GO:0006338	chromatin remodeling	-4.71475	10.8622	7.36901	22539	166	75	6	8	3.13262	2099|3065|3066|3159|4602|6602	ESR1|HDAC1|HDAC2|HMGA1|MYB|SMARCD1	-2.73036	Subtype_2
Canonical Pathways	11	M288	PID HES HEY PATHWAY	-4.70573	25.0433	9.63509	22539	48	75	4	5.33333	2.59458	142|367|3065|4602	PARP1|AR|HDAC1|MYB	-2.72759	Subtype_2
GO Biological Processes	19	GO:0007050	cell cycle arrest	-4.6803	8.34778	6.77759	22539	252	75	7	9.33333	3.35901	580|672|1820|2305|6659|51085|79733	BARD1|BRCA1|ARID3A|FOXM1|SOX4|MLXIPL|E2F8	-2.70833	Subtype_2
GO Biological Processes	19	GO:0009792	embryo development ending in birth or egg hatching	-4.6628	5.18138	5.89484	22539	580	75	10	13.3333	3.92523	367|672|1999|3202|4223|6659|7020|7703|7942|79733	AR|BRCA1|ELF3|HOXA5|MEOX2|SOX4|TFAP2A|PCGF2|TFEB|E2F8	-2.6969	Subtype_2
GO Biological Processes	19	GO:0048598	embryonic morphogenesis	-4.64367	5.15472	5.87278	22539	583	75	10	13.3333	3.92523	367|3065|3066|3202|5307|6299|6659|7020|7703|7704	AR|HDAC1|HDAC2|HOXA5|PITX1|SALL1|SOX4|TFAP2A|PCGF2|ZBTB16	-2.67978	Subtype_2
CORUM	33	CORUM:632	Anti-HDAC2 complex	-4.6332	53.0329	12.4006	22539	17	75	3	4	2.26274	3065|3066|51317	HDAC1|HDAC2|PHF21A	-2.6713	Subtype_2
GO Biological Processes	19	GO:0036270	response to diuretic	-4.55505	50.0867	12.0379	22539	18	75	3	4	2.26274	3065|3066|10891	HDAC1|HDAC2|PPARGC1A	-2.60688	Subtype_2
GO Biological Processes	19	GO:0031000	response to caffeine	-4.55505	50.0867	12.0379	22539	18	75	3	4	2.26274	3065|3066|10891	HDAC1|HDAC2|PPARGC1A	-2.60688	Subtype_2
GO Biological Processes	19	GO:0044770	cell cycle phase transition	-4.53132	5.00033	5.74354	22539	601	75	10	13.3333	3.92523	672|1820|2146|2305|4171|4175|6659|8462|9319|79733	BRCA1|ARID3A|EZH2|FOXM1|MCM2|MCM6|SOX4|KLF11|TRIP13|E2F8	-2.58699	Subtype_2
GO Biological Processes	19	GO:0019218	regulation of steroid metabolic process	-4.51684	13.913	7.77246	22539	108	75	5	6.66667	2.88033	6095|6097|9971|10891|23541	RORA|RORC|NR1H4|PPARGC1A|SEC14L2	-2.57632	Subtype_2
GO Biological Processes	19	GO:0061377	mammary gland lobule development	-4.48146	47.4505	11.7038	22539	19	75	3	4	2.26274	367|2099|3202	AR|ESR1|HOXA5	-2.5492	Subtype_2
GO Biological Processes	19	GO:0060749	mammary gland alveolus development	-4.48146	47.4505	11.7038	22539	19	75	3	4	2.26274	367|2099|3202	AR|ESR1|HOXA5	-2.5492	Subtype_2
GO Biological Processes	19	GO:0030330	DNA damage response, signal transduction by p53 class mediator	-4.47849	13.66	7.69077	22539	110	75	5	6.66667	2.88033	672|1820|2305|6659|79733	BRCA1|ARID3A|FOXM1|SOX4|E2F8	-2.5492	Subtype_2
GO Biological Processes	19	GO:0000082	G1/S transition of mitotic cell cycle	-4.45822	7.70564	6.44088	22539	273	75	7	9.33333	3.35901	1820|2146|4171|4175|6659|8462|79733	ARID3A|EZH2|MCM2|MCM6|SOX4|KLF11|E2F8	-2.53199	Subtype_2
GO Biological Processes	19	GO:0006473	protein acetylation	-4.39791	9.54032	6.81257	22539	189	75	6	8	3.13262	672|3065|3066|6659|7703|10891	BRCA1|HDAC1|HDAC2|SOX4|PCGF2|PPARGC1A	-2.49384	Subtype_2
GO Biological Processes	19	GO:0051129	negative regulation of cellular component organization	-4.38763	4.80832	5.57901	22539	625	75	10	13.3333	3.92523	142|367|672|3066|3159|4091|9232|9319|10891|53335	PARP1|AR|BRCA1|HDAC2|HMGA1|SMAD6|PTTG1|TRIP13|PPARGC1A|BCL11A	-2.48869	Subtype_2
GO Biological Processes	19	GO:0030520	intracellular estrogen receptor signaling pathway	-4.37811	20.7255	8.69119	22539	58	75	4	5.33333	2.59458	142|367|672|2099	PARP1|AR|BRCA1|ESR1	-2.48599	Subtype_2
GO Biological Processes	19	GO:0046631	alpha-beta T cell activation	-4.36779	12.9534	7.45796	22539	116	75	5	6.66667	2.88033	2000|4602|6095|6097|7704	ELF4|MYB|RORA|RORC|ZBTB16	-2.47737	Subtype_2
GO Biological Processes	19	GO:1901699	cellular response to nitrogen compound	-4.36433	4.77774	5.55241	22539	629	75	10	13.3333	3.92523	142|672|688|2099|2146|3066|8462|9971|10891|53335	PARP1|BRCA1|KLF5|ESR1|EZH2|HDAC2|KLF11|NR1H4|PPARGC1A|BCL11A	-2.47597	Subtype_2
GO Biological Processes	19	GO:0034599	cellular response to oxidative stress	-4.34942	7.40718	6.27852	22539	284	75	7	9.33333	3.35901	142|2146|3065|3066|4602|7703|10891	PARP1|EZH2|HDAC1|HDAC2|MYB|PCGF2|PPARGC1A	-2.46561	Subtype_2
GO Biological Processes	19	GO:1903579	negative regulation of ATP metabolic process	-4.34601	42.9314	11.1078	22539	21	75	3	4	2.26274	142|10891|51085	PARP1|PPARGC1A|MLXIPL	-2.46561	Subtype_2
GO Biological Processes	19	GO:2000757	negative regulation of peptidyl-lysine acetylation	-4.34601	42.9314	11.1078	22539	21	75	3	4	2.26274	672|3065|3066	BRCA1|HDAC1|HDAC2	-2.46561	Subtype_2
GO Biological Processes	19	GO:0010869	regulation of receptor biosynthetic process	-4.34601	42.9314	11.1078	22539	21	75	3	4	2.26274	3065|3066|3202	HDAC1|HDAC2|HOXA5	-2.46561	Subtype_2
GO Biological Processes	19	GO:0071229	cellular response to acid chemical	-4.30985	9.19959	6.66184	22539	196	75	6	8	3.13262	3066|4602|6602|9971|10891|53335	HDAC2|MYB|SMARCD1|NR1H4|PPARGC1A|BCL11A	-2.44086	Subtype_2
GO Biological Processes	19	GO:0007517	muscle organ development	-4.29922	6.08648	5.89295	22539	395	75	8	10.6667	3.56443	165|688|1831|3131|4223|5307|6938|7004	AEBP1|KLF5|TSC22D3|HLF|MEOX2|PITX1|TCF12|TEAD4	-2.43661	Subtype_2
GO Biological Processes	19	GO:0044843	cell cycle G1/S phase transition	-4.27325	7.20425	6.1658	22539	292	75	7	9.33333	3.35901	1820|2146|4171|4175|6659|8462|79733	ARID3A|EZH2|MCM2|MCM6|SOX4|KLF11|E2F8	-2.41667	Subtype_2
GO Biological Processes	19	GO:2001251	negative regulation of chromosome organization	-4.24621	12.2163	7.2072	22539	123	75	5	6.66667	2.88033	142|672|3159|9232|9319	PARP1|BRCA1|HMGA1|PTTG1|TRIP13	-2.40222	Subtype_2
GO Biological Processes	19	GO:0042733	embryonic digit morphogenesis	-4.20927	18.7825	8.23148	22539	64	75	4	5.33333	2.59458	3065|3066|6299|7704	HDAC1|HDAC2|SALL1|ZBTB16	-2.37454	Subtype_2
Canonical Pathways	11	M200	PID ERA GENOMIC PATHWAY	-4.20927	18.7825	8.23148	22539	64	75	4	5.33333	2.59458	672|2099|3065|8431	BRCA1|ESR1|HDAC1|NR0B2	-2.37454	Subtype_2
GO Biological Processes	19	GO:0001819	positive regulation of cytokine production	-4.20068	5.89255	5.76248	22539	408	75	8	10.6667	3.56443	672|2547|3065|3066|3148|4602|6095|10623	BRCA1|XRCC6|HDAC1|HDAC2|HMGB2|MYB|RORA|POLR3C	-2.37454	Subtype_2
GO Biological Processes	19	GO:0071417	cellular response to organonitrogen compound	-4.18699	5.10317	5.52334	22539	530	75	9	12	3.75233	142|672|688|2146|3066|8462|9971|10891|53335	PARP1|BRCA1|KLF5|EZH2|HDAC2|KLF11|NR1H4|PPARGC1A|BCL11A	-2.36348	Subtype_2
GO Biological Processes	19	GO:1901984	negative regulation of protein acetylation	-4.16677	37.565	10.3557	22539	24	75	3	4	2.26274	672|3065|3066	BRCA1|HDAC1|HDAC2	-2.34984	Subtype_2
GO Biological Processes	19	GO:0006266	DNA ligation	-4.16677	37.565	10.3557	22539	24	75	3	4	2.26274	142|2547|3148	PARP1|XRCC6|HMGB2	-2.34984	Subtype_2
GO Biological Processes	19	GO:0016571	histone methylation	-4.16388	11.7391	7.04021	22539	128	75	5	6.66667	2.88033	672|2146|4602|9971|11108	BRCA1|EZH2|MYB|NR1H4|PRDM4	-2.34984	Subtype_2
GO Biological Processes	19	GO:0033044	regulation of chromosome organization	-4.14547	6.87464	5.97844	22539	306	75	7	9.33333	3.35901	142|672|3159|4602|9232|9319|10891	PARP1|BRCA1|HMGA1|MYB|PTTG1|TRIP13|PPARGC1A	-2.33952	Subtype_2
GO Biological Processes	19	GO:0045444	fat cell differentiation	-4.13234	8.54559	6.36289	22539	211	75	6	8	3.13262	688|4091|6095|6097|7704|10891	KLF5|SMAD6|RORA|RORC|ZBTB16|PPARGC1A	-2.33578	Subtype_2
GO Biological Processes	19	GO:2001234	negative regulation of apoptotic signaling pathway	-4.13234	8.54559	6.36289	22539	211	75	6	8	3.13262	367|672|2023|3148|7703|10625	AR|BRCA1|ENO1|HMGB2|PCGF2|IVNS1ABP	-2.33578	Subtype_2
GO Biological Processes	19	GO:0032800	receptor biosynthetic process	-4.11229	36.0624	10.1351	22539	25	75	3	4	2.26274	3065|3066|3202	HDAC1|HDAC2|HOXA5	-2.31741	Subtype_2
Canonical Pathways	11	M105	PID TELOMERASE PATHWAY	-4.10584	17.6776	7.95835	22539	68	75	4	5.33333	2.59458	2099|2547|3065|3066	ESR1|XRCC6|HDAC1|HDAC2	-2.31602	Subtype_2
GO Biological Processes	19	GO:0006302	double-strand break repair	-4.09853	8.42579	6.30665	22539	214	75	6	8	3.13262	142|580|672|2305|2547|9319	PARP1|BARD1|BRCA1|FOXM1|XRCC6|TRIP13	-2.31005	Subtype_2
GO Biological Processes	19	GO:0042770	signal transduction in response to DNA damage	-4.06957	11.2134	6.85167	22539	134	75	5	6.66667	2.88033	672|1820|2305|6659|79733	BRCA1|ARID3A|FOXM1|SOX4|E2F8	-2.28773	Subtype_2
GO Biological Processes	19	GO:2001171	positive regulation of ATP biosynthetic process	-4.06009	34.6754	9.92721	22539	26	75	3	4	2.26274	2023|10891|51085	ENO1|PPARGC1A|MLXIPL	-2.28031	Subtype_2
GO Biological Processes	19	GO:0045930	negative regulation of mitotic cell cycle	-4.05822	6.65709	5.85167	22539	316	75	7	9.33333	3.35901	672|1820|2146|6659|9232|9319|79733	BRCA1|ARID3A|EZH2|SOX4|PTTG1|TRIP13|E2F8	-2.28031	Subtype_2
GO Biological Processes	19	GO:0001655	urogenital system development	-4.04967	6.63609	5.8393	22539	317	75	7	9.33333	3.35901	367|2099|4091|6299|6659|7020|7704	AR|ESR1|SMAD6|SALL1|SOX4|TFAP2A|ZBTB16	-2.27436	Subtype_2
GO Biological Processes	19	GO:0006359	regulation of transcription by RNA polymerase III	-4.00997	33.3911	9.73073	22539	27	75	3	4	2.26274	367|672|10623	AR|BRCA1|POLR3C	-2.24237	Subtype_2
GO Biological Processes	19	GO:0035019	somatic stem cell population maintenance	-3.98532	16.4668	7.64795	22539	73	75	4	5.33333	2.59458	5433|6299|6659|9079	POLR2D|SALL1|SOX4|LDB2	-2.22278	Subtype_2
GO Biological Processes	19	GO:0043627	response to estrogen	-3.96228	16.2443	7.58954	22539	74	75	4	5.33333	2.59458	672|2099|4091|8805	BRCA1|ESR1|SMAD6|TRIM24	-2.20723	Subtype_2
GO Biological Processes	19	GO:2001169	regulation of ATP biosynthetic process	-3.93956	16.0277	7.53226	22539	75	75	4	5.33333	2.59458	142|2023|10891|51085	PARP1|ENO1|PPARGC1A|MLXIPL	-2.18944	Subtype_2
GO Biological Processes	19	GO:0043543	protein acylation	-3.93702	7.87389	6.04109	22539	229	75	6	8	3.13262	672|3065|3066|6659|7703|10891	BRCA1|HDAC1|HDAC2|SOX4|PCGF2|PPARGC1A	-2.18933	Subtype_2
GO Biological Processes	19	GO:0043433	negative regulation of DNA binding transcription factor activity	-3.92218	10.4347	6.56266	22539	144	75	5	6.66667	2.88033	2099|2146|3066|8431|9971	ESR1|EZH2|HDAC2|NR0B2|NR1H4	-2.17692	Subtype_2
Canonical Pathways	11	M258	PID BARD1 PATHWAY	-3.91541	31.0883	9.36814	22539	29	75	3	4	2.26274	580|672|2547	BARD1|BRCA1|XRCC6	-2.17512	Subtype_2
GO Biological Processes	19	GO:1901991	negative regulation of mitotic cell cycle phase transition	-3.8757	7.67285	5.94154	22539	235	75	6	8	3.13262	672|1820|2146|6659|9319|79733	BRCA1|ARID3A|EZH2|SOX4|TRIP13|E2F8	-2.14525	Subtype_2
GO Biological Processes	19	GO:0072401	signal transduction involved in DNA integrity checkpoint	-3.87332	15.4113	7.36682	22539	78	75	4	5.33333	2.59458	672|1820|6659|79733	BRCA1|ARID3A|SOX4|E2F8	-2.14525	Subtype_2
GO Biological Processes	19	GO:0072422	signal transduction involved in DNA damage checkpoint	-3.87332	15.4113	7.36682	22539	78	75	4	5.33333	2.59458	672|1820|6659|79733	BRCA1|ARID3A|SOX4|E2F8	-2.14525	Subtype_2
GO Biological Processes	19	GO:2000758	positive regulation of peptidyl-lysine acetylation	-3.87069	30.052	9.20033	22539	30	75	3	4	2.26274	672|6659|10891	BRCA1|SOX4|PPARGC1A	-2.14436	Subtype_2
GO Biological Processes	19	GO:0006261	DNA-dependent DNA replication	-3.85262	10.0846	6.42858	22539	149	75	5	6.66667	2.88033	142|3159|4171|4175|79733	PARP1|HMGA1|MCM2|MCM6|E2F8	-2.13269	Subtype_2
GO Biological Processes	19	GO:0072395	signal transduction involved in cell cycle checkpoint	-3.85185	15.2162	7.3137	22539	79	75	4	5.33333	2.59458	672|1820|6659|79733	BRCA1|ARID3A|SOX4|E2F8	-2.13269	Subtype_2
GO Biological Processes	19	GO:0061448	connective tissue development	-3.80635	7.45091	5.82975	22539	242	75	6	8	3.13262	3202|5307|6097|7704|9971|10891	HOXA5|PITX1|RORC|ZBTB16|NR1H4|PPARGC1A	-2.10039	Subtype_2
Canonical Pathways	11	M115	PID REG GR PATHWAY	-3.78913	14.6595	7.15997	22539	82	75	4	5.33333	2.59458	3065|3066|6602|9970	HDAC1|HDAC2|SMARCD1|NR1I3	-2.09083	Subtype_2
Canonical Pathways	11	M2	PID SMAD2 3NUCLEAR PATHWAY	-3.78913	14.6595	7.15997	22539	82	75	4	5.33333	2.59458	367|2099|3065|3066	AR|ESR1|HDAC1|HDAC2	-2.09083	Subtype_2
GO Biological Processes	19	GO:1903580	positive regulation of ATP metabolic process	-3.78581	28.1737	8.88813	22539	32	75	3	4	2.26274	2023|10891|51085	ENO1|PPARGC1A|MLXIPL	-2.0886	Subtype_2
GO Biological Processes	19	GO:0010564	regulation of cell cycle process	-3.75803	4.03383	4.8657	22539	745	75	10	13.3333	3.92523	672|1820|2146|2305|6659|7703|9232|9319|51085|79733	BRCA1|ARID3A|EZH2|FOXM1|SOX4|PCGF2|PTTG1|TRIP13|MLXIPL|E2F8	-2.06909	Subtype_2
GO Biological Processes	19	GO:0098727	maintenance of cell number	-3.74649	9.5707	6.22675	22539	157	75	5	6.66667	2.88033	2146|5433|6299|6659|9079	EZH2|POLR2D|SALL1|SOX4|LDB2	-2.06299	Subtype_2
GO Biological Processes	19	GO:0070328	triglyceride homeostasis	-3.74546	27.32	8.74256	22539	33	75	3	4	2.26274	6095|9971|51085	RORA|NR1H4|MLXIPL	-2.06299	Subtype_2
GO Biological Processes	19	GO:0055090	acylglycerol homeostasis	-3.74546	27.32	8.74256	22539	33	75	3	4	2.26274	6095|9971|51085	RORA|NR1H4|MLXIPL	-2.06299	Subtype_2
GO Biological Processes	19	GO:0032844	regulation of homeostatic process	-3.72051	5.01912	5.13737	22539	479	75	8	10.6667	3.56443	142|1831|3148|3202|6095|9971|10891|51085	PARP1|TSC22D3|HMGB2|HOXA5|RORA|NR1H4|PPARGC1A|MLXIPL	-2.04237	Subtype_2
GO Biological Processes	19	GO:0016575	histone deacetylation	-3.70923	13.9777	6.96713	22539	86	75	4	5.33333	2.59458	3065|3066|6299|51317	HDAC1|HDAC2|SALL1|PHF21A	-2.03419	Subtype_2
GO Biological Processes	19	GO:1901988	negative regulation of cell cycle phase transition	-3.68338	7.07106	5.63356	22539	255	75	6	8	3.13262	672|1820|2146|6659|9319|79733	BRCA1|ARID3A|EZH2|SOX4|TRIP13|E2F8	-2.01456	Subtype_2
GO Biological Processes	19	GO:0019216	regulation of lipid metabolic process	-3.67945	5.77923	5.31155	22539	364	75	7	9.33333	3.35901	672|6095|6097|9971|10891|23541|51085	BRCA1|RORA|RORC|NR1H4|PPARGC1A|SEC14L2|MLXIPL	-2.01456	Subtype_2
GO Biological Processes	19	GO:0001817	regulation of cytokine production	-3.67335	4.36239	4.90544	22539	620	75	9	12	3.75233	672|2547|3065|3066|3148|4602|6095|9971|10623	BRCA1|XRCC6|HDAC1|HDAC2|HMGB2|MYB|RORA|NR1H4|POLR3C	-2.00986	Subtype_2
GO Biological Processes	19	GO:0071158	positive regulation of cell cycle arrest	-3.67076	13.66	6.87546	22539	88	75	4	5.33333	2.59458	672|1820|6659|79733	BRCA1|ARID3A|SOX4|E2F8	-2.00986	Subtype_2
GO Biological Processes	19	GO:0007519	skeletal muscle tissue development	-3.67073	9.2184	6.08464	22539	163	75	5	6.66667	2.88033	688|1831|3131|4223|5307	KLF5|TSC22D3|HLF|MEOX2|PITX1	-2.00986	Subtype_2
Reactome Gene Sets	6	R-HSA-8953750	Transcriptional Regulation by E2F6	-3.6685	25.7589	8.46992	22539	35	75	3	4	2.26274	672|2146|7703	BRCA1|EZH2|PCGF2	-2.00862	Subtype_2
GO Biological Processes	19	GO:0006310	DNA recombination	-3.66509	7.01603	5.6046	22539	257	75	6	8	3.13262	142|580|672|2547|3148|9319	PARP1|BARD1|BRCA1|XRCC6|HMGB2|TRIP13	-2.00797	Subtype_2
GO Biological Processes	19	GO:0001501	skeletal system development	-3.64772	4.89646	5.04395	22539	491	75	8	10.6667	3.56443	165|3202|5307|6659|7004|7020|7703|7704	AEBP1|HOXA5|PITX1|SOX4|TEAD4|TFAP2A|PCGF2|ZBTB16	-1.99573	Subtype_2
GO Biological Processes	19	GO:0007093	mitotic cell cycle checkpoint	-3.64615	9.10667	6.03889	22539	165	75	5	6.66667	2.88033	672|1820|6659|9319|79733	BRCA1|ARID3A|SOX4|TRIP13|E2F8	-1.99513	Subtype_2
Reactome Gene Sets	6	R-HSA-3700989	Transcriptional Regulation by TP53	-3.64336	5.70092	5.26088	22539	369	75	7	9.33333	3.35901	580|672|1820|3065|3066|5433|79733	BARD1|BRCA1|ARID3A|HDAC1|HDAC2|POLR2D|E2F8	-1.99331	Subtype_2
GO Biological Processes	19	GO:1903578	regulation of ATP metabolic process	-3.63323	13.3564	6.78674	22539	90	75	4	5.33333	2.59458	142|2023|10891|51085	PARP1|ENO1|PPARGC1A|MLXIPL	-1.98512	Subtype_2
GO Biological Processes	19	GO:0046890	regulation of lipid biosynthetic process	-3.62191	8.9976	5.99391	22539	167	75	5	6.66667	2.88033	672|9971|10891|23541|51085	BRCA1|NR1H4|PPARGC1A|SEC14L2|MLXIPL	-1.97776	Subtype_2
GO Biological Processes	19	GO:0046632	alpha-beta T cell differentiation	-3.61479	13.2097	6.74343	22539	91	75	4	5.33333	2.59458	4602|6095|6097|7704	MYB|RORA|RORC|ZBTB16	-1.97435	Subtype_2
GO Biological Processes	19	GO:0070301	cellular response to hydrogen peroxide	-3.59658	13.0661	6.70079	22539	92	75	4	5.33333	2.59458	2146|3066|4602|7703	EZH2|HDAC2|MYB|PCGF2	-1.9618	Subtype_2
GO Biological Processes	19	GO:0060538	skeletal muscle organ development	-3.57436	8.78713	5.90618	22539	171	75	5	6.66667	2.88033	688|1831|3131|4223|5307	KLF5|TSC22D3|HLF|MEOX2|PITX1	-1.94795	Subtype_2
GO Biological Processes	19	GO:0009410	response to xenobiotic stimulus	-3.56731	6.72806	5.45067	22539	268	75	6	8	3.13262	3065|3066|6095|6097|8856|10891	HDAC1|HDAC2|RORA|RORC|NR1I2|PPARGC1A	-1.94273	Subtype_2
GO Biological Processes	19	GO:1901985	positive regulation of protein acetylation	-3.56138	23.7253	8.10111	22539	38	75	3	4	2.26274	672|6659|10891	BRCA1|SOX4|PPARGC1A	-1.93772	Subtype_2
GO Biological Processes	19	GO:2001233	regulation of apoptotic signaling pathway	-3.55903	5.52136	5.14294	22539	381	75	7	9.33333	3.35901	142|367|672|2023|3148|7703|10625	PARP1|AR|BRCA1|ENO1|HMGB2|PCGF2|IVNS1ABP	-1.93628	Subtype_2
GO Biological Processes	19	GO:0006479	protein methylation	-3.52804	8.58629	5.82128	22539	175	75	5	6.66667	2.88033	672|2146|4602|9971|11108	BRCA1|EZH2|MYB|NR1H4|PRDM4	-1.91215	Subtype_2
GO Biological Processes	19	GO:0008213	protein alkylation	-3.52804	8.58629	5.82128	22539	175	75	5	6.66667	2.88033	672|2146|4602|9971|11108	BRCA1|EZH2|MYB|NR1H4|PRDM4	-1.91215	Subtype_2
GO Biological Processes	19	GO:0060612	adipose tissue development	-3.52766	23.1169	7.98749	22539	39	75	3	4	2.26274	6097|9971|10891	RORC|NR1H4|PPARGC1A	-1.91215	Subtype_2
GO Biological Processes	19	GO:0040029	regulation of gene expression, epigenetic	-3.51968	4.68647	4.8803	22539	513	75	8	10.6667	3.56443	672|2099|2146|3065|3066|3159|5433|6602	BRCA1|ESR1|EZH2|HDAC1|HDAC2|HMGA1|POLR2D|SMARCD1	-1.90596	Subtype_2
GO Biological Processes	19	GO:0071824	protein-DNA complex subunit organization	-3.50744	6.5568	5.35716	22539	275	75	6	8	3.13262	142|2099|3148|3159|4171|6602	PARP1|ESR1|HMGB2|HMGA1|MCM2|SMARCD1	-1.89817	Subtype_2
GO Biological Processes	19	GO:1901796	regulation of signal transduction by p53 class mediator	-3.50531	8.48927	5.77983	22539	177	75	5	6.66667	2.88033	580|672|3065|3066|8805	BARD1|BRCA1|HDAC1|HDAC2|TRIM24	-1.89692	Subtype_2
GO Biological Processes	19	GO:0051090	regulation of DNA binding transcription factor activity	-3.49779	5.39395	5.05772	22539	390	75	7	9.33333	3.35901	367|2099|2146|3066|8431|9971|10891	AR|ESR1|EZH2|HDAC2|NR0B2|NR1H4|PPARGC1A	-1.89467	Subtype_2
GO Biological Processes	19	GO:0070317	negative regulation of G0 to G1 transition	-3.49484	22.539	7.87805	22539	40	75	3	4	2.26274	672|2146|7703	BRCA1|EZH2|PCGF2	-1.89315	Subtype_2
GO Biological Processes	19	GO:0042752	regulation of circadian rhythm	-3.49158	12.2661	6.4582	22539	98	75	4	5.33333	2.59458	2146|6095|6097|10891	EZH2|RORA|RORC|PPARGC1A	-1.89106	Subtype_2
GO Biological Processes	19	GO:0006476	protein deacetylation	-3.47476	12.1422	6.41982	22539	99	75	4	5.33333	2.59458	3065|3066|6299|51317	HDAC1|HDAC2|SALL1|PHF21A	-1.87855	Subtype_2
GO Biological Processes	19	GO:0009749	response to glucose	-3.43881	8.21093	5.65932	22539	183	75	5	6.66667	2.88033	6659|8431|9971|10891|51085	SOX4|NR0B2|NR1H4|PPARGC1A|MLXIPL	-1.84687	Subtype_2
Reactome Gene Sets	6	R-HSA-74158	RNA Polymerase III Transcription	-3.43172	21.4657	7.67068	22539	42	75	3	4	2.26274	2976|4782|10623	GTF3C2|NFIC|POLR3C	-1.84318	Subtype_2
Reactome Gene Sets	6	R-HSA-749476	RNA Polymerase III Abortive And Retractive Initiation	-3.43172	21.4657	7.67068	22539	42	75	3	4	2.26274	2976|4782|10623	GTF3C2|NFIC|POLR3C	-1.84318	Subtype_2
GO Biological Processes	19	GO:0043414	macromolecule methylation	-3.40876	6.28265	5.20419	22539	287	75	6	8	3.13262	142|672|2146|4602|9971|11108	PARP1|BRCA1|EZH2|MYB|NR1H4|PRDM4	-1.82524	Subtype_2
GO Biological Processes	19	GO:0014013	regulation of gliogenesis	-3.39331	11.5585	6.2359	22539	104	75	4	5.33333	2.59458	2146|3065|3066|4602	EZH2|HDAC1|HDAC2|MYB	-1.81394	Subtype_2
GO Biological Processes	19	GO:0009746	response to hexose	-3.38522	7.99255	5.56302	22539	188	75	5	6.66667	2.88033	6659|8431|9971|10891|51085	SOX4|NR0B2|NR1H4|PPARGC1A|MLXIPL	-1.80914	Subtype_2
GO Biological Processes	19	GO:0070316	regulation of G0 to G1 transition	-3.37172	20.49	7.47722	22539	44	75	3	4	2.26274	672|2146|7703	BRCA1|EZH2|PCGF2	-1.79646	Subtype_2
GO Biological Processes	19	GO:0071103	DNA conformation change	-3.36118	6.15399	5.13093	22539	293	75	6	8	3.13262	142|2547|3148|3159|4171|4175	PARP1|XRCC6|HMGB2|HMGA1|MCM2|MCM6	-1.78837	Subtype_2
GO Biological Processes	19	GO:0001816	cytokine production	-3.35619	3.94844	4.52811	22539	685	75	9	12	3.75233	672|2547|3065|3066|3148|4602|6095|9971|10623	BRCA1|XRCC6|HDAC1|HDAC2|HMGB2|MYB|RORA|NR1H4|POLR3C	-1.78525	Subtype_2
GO Biological Processes	19	GO:0060443	mammary gland morphogenesis	-3.34279	20.0347	7.38521	22539	45	75	3	4	2.26274	367|1999|2099	AR|ELF3|ESR1	-1.77563	Subtype_2
GO Biological Processes	19	GO:0034284	response to monosaccharide	-3.3332	7.78549	5.47022	22539	193	75	5	6.66667	2.88033	6659|8431|9971|10891|51085	SOX4|NR0B2|NR1H4|PPARGC1A|MLXIPL	-1.76844	Subtype_2
GO Biological Processes	19	GO:0043523	regulation of neuron apoptotic process	-3.32298	7.74536	5.45206	22539	194	75	5	6.66667	2.88033	142|3065|4602|7020|10891	PARP1|HDAC1|MYB|TFAP2A|PPARGC1A	-1.76456	Subtype_2
GO Biological Processes	19	GO:0035601	protein deacylation	-3.316	11.0283	6.06413	22539	109	75	4	5.33333	2.59458	3065|3066|6299|51317	HDAC1|HDAC2|SALL1|PHF21A	-1.75924	Subtype_2
GO Biological Processes	19	GO:0045023	G0 to G1 transition	-3.31454	19.5991	7.29613	22539	46	75	3	4	2.26274	672|2146|7703	BRCA1|EZH2|PCGF2	-1.75924	Subtype_2
GO Biological Processes	19	GO:0098732	macromolecule deacylation	-3.30101	10.928	6.03112	22539	110	75	4	5.33333	2.59458	3065|3066|6299|51317	HDAC1|HDAC2|SALL1|PHF21A	-1.74961	Subtype_2
GO Biological Processes	19	GO:0001763	morphogenesis of a branching structure	-3.29266	7.62741	5.39835	22539	197	75	5	6.66667	2.88033	367|2099|3202|6299|53335	AR|ESR1|HOXA5|SALL1|BCL11A	-1.74512	Subtype_2
GO Biological Processes	19	GO:0045739	positive regulation of DNA repair	-3.28693	19.1821	7.20982	22539	47	75	3	4	2.26274	142|672|2305	PARP1|BRCA1|FOXM1	-1.74321	Subtype_2
GO Biological Processes	19	GO:0048568	embryonic organ development	-3.26859	4.93812	4.74149	22539	426	75	7	9.33333	3.35901	3202|6299|7004|7020|7703|7942|79733	HOXA5|SALL1|TEAD4|TFAP2A|PCGF2|TFEB|E2F8	-1.73091	Subtype_2
GO Biological Processes	19	GO:2000134	negative regulation of G1/S transition of mitotic cell cycle	-3.22817	10.4529	5.8722	22539	115	75	4	5.33333	2.59458	1820|2146|6659|79733	ARID3A|EZH2|SOX4|E2F8	-1.70157	Subtype_2
GO Biological Processes	19	GO:0006979	response to oxidative stress	-3.21488	4.83595	4.66796	22539	435	75	7	9.33333	3.35901	142|2146|3065|3066|4602|7703|10891	PARP1|EZH2|HDAC1|HDAC2|MYB|PCGF2|PPARGC1A	-1.69352	Subtype_2
GO Biological Processes	19	GO:0002064	epithelial cell development	-3.21428	7.32976	5.26048	22539	205	75	5	6.66667	2.88033	367|688|2099|3202|29842	AR|KLF5|ESR1|HOXA5|TFCP2L1	-1.69352	Subtype_2
GO Biological Processes	19	GO:0070997	neuron death	-3.18871	5.70608	4.86795	22539	316	75	6	8	3.13262	142|3065|4223|4602|7020|10891	PARP1|HDAC1|MEOX2|MYB|TFAP2A|PPARGC1A	-1.67297	Subtype_2
Reactome Gene Sets	6	R-HSA-1989781	PPARA activates gene expression	-3.17234	10.1015	5.75194	22539	119	75	4	5.33333	2.59458	6095|7004|9971|10891	RORA|TEAD4|NR1H4|PPARGC1A	-1.65874	Subtype_2
GO Biological Processes	19	GO:0071333	cellular response to glucose stimulus	-3.15871	10.0173	5.72276	22539	120	75	4	5.33333	2.59458	6659|9971|10891|51085	SOX4|NR1H4|PPARGC1A|MLXIPL	-1.64967	Subtype_2
GO Biological Processes	19	GO:0042093	T-helper cell differentiation	-3.15764	17.3377	6.81509	22539	52	75	3	4	2.26274	4602|6095|6097	MYB|RORA|RORC	-1.64967	Subtype_2
Reactome Gene Sets	6	R-HSA-8878166	Transcriptional regulation by RUNX2	-3.1452	9.93455	5.69392	22539	121	75	4	5.33333	2.59458	367|2099|4091|10891	AR|ESR1|SMAD6|PPARGC1A	-1.64072	Subtype_2
GO Biological Processes	19	GO:0045598	regulation of fat cell differentiation	-3.1452	9.93455	5.69392	22539	121	75	4	5.33333	2.59458	688|6095|6097|7704	KLF5|RORA|RORC|ZBTB16	-1.64072	Subtype_2
GO Biological Processes	19	GO:0042476	odontogenesis	-3.1452	9.93455	5.69392	22539	121	75	4	5.33333	2.59458	3065|3066|4782|7020	HDAC1|HDAC2|NFIC|TFAP2A	-1.64072	Subtype_2
GO Biological Processes	19	GO:0071398	cellular response to fatty acid	-3.13337	17.0106	6.74269	22539	53	75	3	4	2.26274	6602|9971|10891	SMARCD1|NR1H4|PPARGC1A	-1.63097	Subtype_2
Canonical Pathways	11	M151	PID AR TF PATHWAY	-3.13337	17.0106	6.74269	22539	53	75	3	4	2.26274	367|3065|8805	AR|HDAC1|TRIM24	-1.63097	Subtype_2
GO Biological Processes	19	GO:1902807	negative regulation of cell cycle G1/S phase transition	-3.1318	9.85311	5.66542	22539	122	75	4	5.33333	2.59458	1820|2146|6659|79733	ARID3A|EZH2|SOX4|E2F8	-1.63079	Subtype_2
Reactome Gene Sets	6	R-HSA-400206	Regulation of lipid metabolism by Peroxisome proliferator-activated receptor alpha (PPARalpha)	-3.1318	9.85311	5.66542	22539	122	75	4	5.33333	2.59458	6095|7004|9971|10891	RORA|TEAD4|NR1H4|PPARGC1A	-1.63079	Subtype_2
GO Biological Processes	19	GO:0051054	positive regulation of DNA metabolic process	-3.13012	7.0215	5.11399	22539	214	75	5	6.66667	2.88033	142|672|2305|10891|79733	PARP1|BRCA1|FOXM1|PPARGC1A|E2F8	-1.63048	Subtype_2
GO Biological Processes	19	GO:0009743	response to carbohydrate	-3.13012	7.0215	5.11399	22539	214	75	5	6.66667	2.88033	6659|8431|9971|10891|51085	SOX4|NR0B2|NR1H4|PPARGC1A|MLXIPL	-1.63048	Subtype_2
GO Biological Processes	19	GO:0001101	response to acid chemical	-3.12516	5.54806	4.77199	22539	325	75	6	8	3.13262	3066|4602|6602|9971|10891|53335	HDAC2|MYB|SMARCD1|NR1H4|PPARGC1A|BCL11A	-1.62689	Subtype_2
GO Biological Processes	19	GO:0071331	cellular response to hexose stimulus	-3.11853	9.77301	5.63724	22539	123	75	4	5.33333	2.59458	6659|9971|10891|51085	SOX4|NR1H4|PPARGC1A|MLXIPL	-1.623	Subtype_2
GO Biological Processes	19	GO:0002294	CD4-positive, alpha-beta T cell differentiation involved in immune response	-3.10958	16.6956	6.67224	22539	54	75	3	4	2.26274	4602|6095|6097	MYB|RORA|RORC	-1.61753	Subtype_2
GO Biological Processes	19	GO:0035270	endocrine system development	-3.10538	9.69419	5.60939	22539	124	75	4	5.33333	2.59458	3202|5307|6299|6659	HOXA5|PITX1|SALL1|SOX4	-1.61593	Subtype_2
GO Biological Processes	19	GO:0071326	cellular response to monosaccharide stimulus	-3.10538	9.69419	5.60939	22539	124	75	4	5.33333	2.59458	6659|9971|10891|51085	SOX4|NR1H4|PPARGC1A|MLXIPL	-1.61593	Subtype_2
GO Biological Processes	19	GO:0003002	regionalization	-3.09757	5.48061	4.73048	22539	329	75	6	8	3.13262	367|3202|4091|4223|7703|7704	AR|HOXA5|SMAD6|MEOX2|PCGF2|ZBTB16	-1.61079	Subtype_2
GO Biological Processes	19	GO:0060688	regulation of morphogenesis of a branching structure	-3.08625	16.392	6.60366	22539	55	75	3	4	2.26274	367|2099|53335	AR|ESR1|BCL11A	-1.60544	Subtype_2
GO Biological Processes	19	GO:0002287	alpha-beta T cell activation involved in immune response	-3.08625	16.392	6.60366	22539	55	75	3	4	2.26274	4602|6095|6097	MYB|RORA|RORC	-1.60544	Subtype_2
GO Biological Processes	19	GO:0002293	alpha-beta T cell differentiation involved in immune response	-3.08625	16.392	6.60366	22539	55	75	3	4	2.26274	4602|6095|6097	MYB|RORA|RORC	-1.60544	Subtype_2
GO Biological Processes	19	GO:0051402	neuron apoptotic process	-3.08508	6.86119	5.03623	22539	219	75	5	6.66667	2.88033	142|3065|4602|7020|10891	PARP1|HDAC1|MYB|TFAP2A|PPARGC1A	-1.60544	Subtype_2
GO Biological Processes	19	GO:0000075	cell cycle checkpoint	-3.08508	6.86119	5.03623	22539	219	75	5	6.66667	2.88033	672|1820|6659|9319|79733	BRCA1|ARID3A|SOX4|TRIP13|E2F8	-1.60544	Subtype_2
GO Biological Processes	19	GO:0031400	negative regulation of protein modification process	-3.08137	4.02033	4.32536	22539	598	75	8	10.6667	3.56443	672|2305|3065|3066|4091|6659|10891|51085	BRCA1|FOXM1|HDAC1|HDAC2|SMAD6|SOX4|PPARGC1A|MLXIPL	-1.60384	Subtype_2
GO Biological Processes	19	GO:0046887	positive regulation of hormone secretion	-3.07942	9.54032	5.55462	22539	126	75	4	5.33333	2.59458	4602|6659|8431|9971	MYB|SOX4|NR0B2|NR1H4	-1.60319	Subtype_2
Reactome Gene Sets	6	R-HSA-157118	Signaling by NOTCH	-3.07942	9.54032	5.55462	22539	126	75	4	5.33333	2.59458	1871|1999|3065|3066	E2F3|ELF3|HDAC1|HDAC2	-1.60319	Subtype_2
GO Biological Processes	19	GO:0030217	T cell differentiation	-3.05861	6.76847	4.99073	22539	222	75	5	6.66667	2.88033	4602|6095|6097|6659|7704	MYB|RORA|RORC|SOX4|ZBTB16	-1.58578	Subtype_2
GO Biological Processes	19	GO:0000302	response to reactive oxygen species	-3.04119	6.70804	4.96086	22539	224	75	5	6.66667	2.88033	2146|3066|4602|7703|10891	EZH2|HDAC2|MYB|PCGF2|PPARGC1A	-1.57626	Subtype_2
GO Biological Processes	19	GO:1900543	negative regulation of purine nucleotide metabolic process	-3.04093	15.8168	6.47173	22539	57	75	3	4	2.26274	142|10891|51085	PARP1|PPARGC1A|MLXIPL	-1.57626	Subtype_2
GO Biological Processes	19	GO:0014015	positive regulation of gliogenesis	-3.04093	15.8168	6.47173	22539	57	75	3	4	2.26274	3065|3066|4602	HDAC1|HDAC2|MYB	-1.57626	Subtype_2
GO Biological Processes	19	GO:0045980	negative regulation of nucleotide metabolic process	-3.0189	15.5441	6.40824	22539	58	75	3	4	2.26274	142|10891|51085	PARP1|PPARGC1A|MLXIPL	-1.55802	Subtype_2
GO Biological Processes	19	GO:0071322	cellular response to carbohydrate stimulus	-3.01644	9.17618	5.42287	22539	131	75	4	5.33333	2.59458	6659|9971|10891|51085	SOX4|NR1H4|PPARGC1A|MLXIPL	-1.55619	Subtype_2
GO Biological Processes	19	GO:0010639	negative regulation of organelle organization	-3.00402	5.25691	4.59038	22539	343	75	6	8	3.13262	142|672|3159|9232|9319|10891	PARP1|BRCA1|HMGA1|PTTG1|TRIP13|PPARGC1A	-1.54554	Subtype_2
GO Biological Processes	19	GO:0051169	nuclear transport	-3.00205	4.44744	4.37835	22539	473	75	7	9.33333	3.35901	142|580|3159|5433|6659|10140|10921	PARP1|BARD1|HMGA1|POLR2D|SOX4|TOB1|RNPS1	-1.54554	Subtype_2
GO Biological Processes	19	GO:0097237	cellular response to toxic substance	-2.9984	6.56157	4.88776	22539	229	75	5	6.66667	2.88033	2146|3066|4602|7703|10891	EZH2|HDAC2|MYB|PCGF2|PPARGC1A	-1.54325	Subtype_2
Canonical Pathways	11	M166	PID ATF2 PATHWAY	-2.99727	15.2807	6.34631	22539	59	75	3	4	2.26274	672|2099|10891	BRCA1|ESR1|PPARGC1A	-1.54325	Subtype_2
GO Biological Processes	19	GO:0043124	negative regulation of I-kappaB kinase/NF-kappaB signaling	-2.99727	15.2807	6.34631	22539	59	75	3	4	2.26274	2099|6095|9971	ESR1|RORA|NR1H4	-1.54325	Subtype_2
GO Biological Processes	19	GO:0030879	mammary gland development	-2.97991	8.97075	5.34717	22539	134	75	4	5.33333	2.59458	367|1999|2099|3202	AR|ELF3|ESR1|HOXA5	-1.52836	Subtype_2
GO Biological Processes	19	GO:0032259	methylation	-2.9717	5.18138	4.54219	22539	348	75	6	8	3.13262	142|672|2146|4602|9971|11108	PARP1|BRCA1|EZH2|MYB|NR1H4|PRDM4	-1.52138	Subtype_2
GO Biological Processes	19	GO:0045814	negative regulation of gene expression, epigenetic	-2.96793	8.9043	5.32246	22539	135	75	4	5.33333	2.59458	2146|3065|3066|3159	EZH2|HDAC1|HDAC2|HMGA1	-1.51822	Subtype_2
GO Biological Processes	19	GO:0001678	cellular glucose homeostasis	-2.95605	8.83882	5.298	22539	136	75	4	5.33333	2.59458	6659|9971|10891|51085	SOX4|NR1H4|PPARGC1A|MLXIPL	-1.51093	Subtype_2
Reactome Gene Sets	6	R-HSA-8943724	Regulation of PTEN gene transcription	-2.95516	14.7797	6.22687	22539	61	75	3	4	2.26274	2146|3065|3066	EZH2|HDAC1|HDAC2	-1.51093	Subtype_2
GO Biological Processes	19	GO:0031670	cellular response to nutrient	-2.95516	14.7797	6.22687	22539	61	75	3	4	2.26274	8805|9971|53335	TRIM24|NR1H4|BCL11A	-1.51093	Subtype_2
Canonical Pathways	11	M58	PID AR PATHWAY	-2.95516	14.7797	6.22687	22539	61	75	3	4	2.26274	367|672|2547	AR|BRCA1|XRCC6	-1.51093	Subtype_2
GO Biological Processes	19	GO:0002292	T cell differentiation involved in immune response	-2.95516	14.7797	6.22687	22539	61	75	3	4	2.26274	4602|6095|6097	MYB|RORA|RORC	-1.51093	Subtype_2
GO Biological Processes	19	GO:0042542	response to hydrogen peroxide	-2.94427	8.77431	5.2738	22539	137	75	4	5.33333	2.59458	2146|3066|4602|7703	EZH2|HDAC2|MYB|PCGF2	-1.50245	Subtype_2
GO Biological Processes	19	GO:0006977	DNA damage response, signal transduction by p53 class mediator resulting in cell cycle arrest	-2.93465	14.5413	6.16924	22539	62	75	3	4	2.26274	1820|6659|79733	ARID3A|SOX4|E2F8	-1.49636	Subtype_2
Reactome Gene Sets	6	R-HSA-8878171	Transcriptional regulation by RUNX1	-2.91593	6.28703	4.74792	22539	239	75	5	6.66667	2.88033	2099|3065|4602|6602|6938	ESR1|HDAC1|MYB|SMARCD1|TCF12	-1.48337	Subtype_2
Canonical Pathways	11	M254	PID MYC REPRESS PATHWAY	-2.9145	14.3105	6.11293	22539	63	75	3	4	2.26274	672|1052|3065	BRCA1|CEBPD|HDAC1	-1.48337	Subtype_2
GO Biological Processes	19	GO:1902400	intracellular signal transduction involved in G1 DNA damage checkpoint	-2.9145	14.3105	6.11293	22539	63	75	3	4	2.26274	1820|6659|79733	ARID3A|SOX4|E2F8	-1.48337	Subtype_2
GO Biological Processes	19	GO:0072431	signal transduction involved in mitotic G1 DNA damage checkpoint	-2.9145	14.3105	6.11293	22539	63	75	3	4	2.26274	1820|6659|79733	ARID3A|SOX4|E2F8	-1.48337	Subtype_2
GO Biological Processes	19	GO:0009880	embryonic pattern specification	-2.89468	14.0869	6.05788	22539	64	75	3	4	2.26274	4091|4223|7704	SMAD6|MEOX2|ZBTB16	-1.46823	Subtype_2
GO Biological Processes	19	GO:0043367	CD4-positive, alpha-beta T cell differentiation	-2.89468	14.0869	6.05788	22539	64	75	3	4	2.26274	4602|6095|6097	MYB|RORA|RORC	-1.46823	Subtype_2
GO Biological Processes	19	GO:0046889	positive regulation of lipid biosynthetic process	-2.89468	14.0869	6.05788	22539	64	75	3	4	2.26274	9971|10891|51085	NR1H4|PPARGC1A|MLXIPL	-1.46823	Subtype_2
GO Biological Processes	19	GO:0006754	ATP biosynthetic process	-2.88674	8.46535	5.15637	22539	142	75	4	5.33333	2.59458	142|2023|10891|51085	PARP1|ENO1|PPARGC1A|MLXIPL	-1.46087	Subtype_2
Reactome Gene Sets	6	R-HSA-1640170	Cell Cycle	-2.88389	3.7448	4.0769	22539	642	75	8	10.6667	3.56443	580|672|1871|2305|3065|4171|4175|9232	BARD1|BRCA1|E2F3|FOXM1|HDAC1|MCM2|MCM6|PTTG1	-1.46032	Subtype_2
GO Biological Processes	19	GO:0072413	signal transduction involved in mitotic cell cycle checkpoint	-2.87519	13.8702	6.00406	22539	65	75	3	4	2.26274	1820|6659|79733	ARID3A|SOX4|E2F8	-1.45622	Subtype_2
GO Biological Processes	19	GO:1900373	positive regulation of purine nucleotide biosynthetic process	-2.87519	13.8702	6.00406	22539	65	75	3	4	2.26274	2023|10891|51085	ENO1|PPARGC1A|MLXIPL	-1.45622	Subtype_2
GO Biological Processes	19	GO:1902402	signal transduction involved in mitotic DNA damage checkpoint	-2.87519	13.8702	6.00406	22539	65	75	3	4	2.26274	1820|6659|79733	ARID3A|SOX4|E2F8	-1.45622	Subtype_2
GO Biological Processes	19	GO:1902403	signal transduction involved in mitotic DNA integrity checkpoint	-2.87519	13.8702	6.00406	22539	65	75	3	4	2.26274	1820|6659|79733	ARID3A|SOX4|E2F8	-1.45622	Subtype_2
Canonical Pathways	11	M279	PID RB 1PATHWAY	-2.87519	13.8702	6.00406	22539	65	75	3	4	2.26274	1052|1871|3065	CEBPD|E2F3|HDAC1	-1.45622	Subtype_2
GO Biological Processes	19	GO:0030810	positive regulation of nucleotide biosynthetic process	-2.87519	13.8702	6.00406	22539	65	75	3	4	2.26274	2023|10891|51085	ENO1|PPARGC1A|MLXIPL	-1.45622	Subtype_2
GO Biological Processes	19	GO:0006306	DNA methylation	-2.83716	13.4561	5.89989	22539	67	75	3	4	2.26274	142|672|2146	PARP1|BRCA1|EZH2	-1.42995	Subtype_2
GO Biological Processes	19	GO:0006305	DNA alkylation	-2.83716	13.4561	5.89989	22539	67	75	3	4	2.26274	142|672|2146	PARP1|BRCA1|EZH2	-1.42995	Subtype_2
GO Biological Processes	19	GO:0003281	ventricular septum development	-2.83716	13.4561	5.89989	22539	67	75	3	4	2.26274	4091|6299|6659	SMAD6|SALL1|SOX4	-1.42995	Subtype_2
GO Biological Processes	19	GO:0061180	mammary gland epithelium development	-2.83716	13.4561	5.89989	22539	67	75	3	4	2.26274	367|2099|3202	AR|ESR1|HOXA5	-1.42995	Subtype_2
Reactome Gene Sets	6	R-HSA-453279	Mitotic G1-G1/S phases	-2.83142	8.17741	5.04458	22539	147	75	4	5.33333	2.59458	1871|3065|4171|4175	E2F3|HDAC1|MCM2|MCM6	-1.42482	Subtype_2
GO Biological Processes	19	GO:0010817	regulation of hormone levels	-2.82858	4.14919	4.14401	22539	507	75	7	9.33333	3.35901	2099|3065|4602|6659|8431|9971|10891	ESR1|HDAC1|MYB|SOX4|NR0B2|NR1H4|PPARGC1A	-1.42254	Subtype_2
GO Biological Processes	19	GO:0071695	anatomical structure maturation	-2.8206	8.12216	5.02286	22539	148	75	4	5.33333	2.59458	3202|9319|29842|53335	HOXA5|TRIP13|TFCP2L1|BCL11A	-1.41677	Subtype_2
GO Biological Processes	19	GO:1900371	regulation of purine nucleotide biosynthetic process	-2.8206	8.12216	5.02286	22539	148	75	4	5.33333	2.59458	142|2023|10891|51085	PARP1|ENO1|PPARGC1A|MLXIPL	-1.41677	Subtype_2
Reactome Gene Sets	6	R-HSA-68867	Assembly of the pre-replicative complex	-2.8186	13.2582	5.84946	22539	68	75	3	4	2.26274	1871|4171|4175	E2F3|MCM2|MCM6	-1.41611	Subtype_2
GO Biological Processes	19	GO:0032024	positive regulation of insulin secretion	-2.8186	13.2582	5.84946	22539	68	75	3	4	2.26274	6659|8431|9971	SOX4|NR0B2|NR1H4	-1.41611	Subtype_2
GO Biological Processes	19	GO:0003006	developmental process involved in reproduction	-2.81213	3.64819	3.9867	22539	659	75	8	10.6667	3.56443	367|2099|3148|6299|7704|7942|9319|79733	AR|ESR1|HMGB2|SALL1|ZBTB16|TFEB|TRIP13|E2F8	-1.4105	Subtype_2
GO Biological Processes	19	GO:0030808	regulation of nucleotide biosynthetic process	-2.80987	8.06765	5.00134	22539	149	75	4	5.33333	2.59458	142|2023|10891|51085	PARP1|ENO1|PPARGC1A|MLXIPL	-1.40988	Subtype_2
GO Biological Processes	19	GO:0010035	response to inorganic substance	-2.80428	4.10867	4.11128	22539	512	75	7	9.33333	3.35901	142|2146|3066|4602|7020|7703|10891	PARP1|EZH2|HDAC2|MYB|TFAP2A|PCGF2|PPARGC1A	-1.40593	Subtype_2
Reactome Gene Sets	6	R-HSA-5693571	Nonhomologous End-Joining (NHEJ)	-2.80033	13.0661	5.80008	22539	69	75	3	4	2.26274	580|672|2547	BARD1|BRCA1|XRCC6	-1.40361	Subtype_2
GO Biological Processes	19	GO:0070482	response to oxygen levels	-2.79451	4.78281	4.27982	22539	377	75	6	8	3.13262	2023|3065|3066|4602|6095|10891	ENO1|HDAC1|HDAC2|MYB|RORA|PPARGC1A	-1.39995	Subtype_2
GO Biological Processes	19	GO:0045596	negative regulation of cell differentiation	-2.79148	3.62072	3.96074	22539	664	75	8	10.6667	3.56443	2146|3065|3066|3202|6095|7704|10140|53335	EZH2|HDAC1|HDAC2|HOXA5|RORA|ZBTB16|TOB1|BCL11A	-1.39746	Subtype_2
Reactome Gene Sets	6	R-HSA-4551638	SUMOylation of chromatin organization proteins	-2.78234	12.8794	5.75172	22539	70	75	3	4	2.26274	3065|3066|7703	HDAC1|HDAC2|PCGF2	-1.38939	Subtype_2
GO Biological Processes	19	GO:0048754	branching morphogenesis of an epithelial tube	-2.77814	7.90842	4.93796	22539	152	75	4	5.33333	2.59458	367|2099|3202|6299	AR|ESR1|HOXA5|SALL1	-1.38609	Subtype_2
GO Biological Processes	19	GO:0042063	gliogenesis	-2.77702	5.84669	4.51523	22539	257	75	5	6.66667	2.88033	2146|3065|3066|4602|6659	EZH2|HDAC1|HDAC2|MYB|SOX4	-1.38569	Subtype_2
GO Biological Processes	19	GO:0009206	purine ribonucleoside triphosphate biosynthetic process	-2.76772	7.85673	4.91722	22539	153	75	4	5.33333	2.59458	142|2023|10891|51085	PARP1|ENO1|PPARGC1A|MLXIPL	-1.37914	Subtype_2
GO Biological Processes	19	GO:0031571	mitotic G1 DNA damage checkpoint	-2.76462	12.698	5.70433	22539	71	75	3	4	2.26274	1820|6659|79733	ARID3A|SOX4|E2F8	-1.37914	Subtype_2
KEGG Pathway	24	hsa05220	Chronic myeloid leukemia	-2.76462	12.698	5.70433	22539	71	75	3	4	2.26274	1871|3065|3066	E2F3|HDAC1|HDAC2	-1.37914	Subtype_2
GO Biological Processes	19	GO:0044819	mitotic G1/S transition checkpoint	-2.76462	12.698	5.70433	22539	71	75	3	4	2.26274	1820|6659|79733	ARID3A|SOX4|E2F8	-1.37914	Subtype_2
GO Biological Processes	19	GO:0009145	purine nucleoside triphosphate biosynthetic process	-2.75737	7.80571	4.89666	22539	154	75	4	5.33333	2.59458	142|2023|10891|51085	PARP1|ENO1|PPARGC1A|MLXIPL	-1.37301	Subtype_2
GO Biological Processes	19	GO:0000077	DNA damage checkpoint	-2.75737	7.80571	4.89666	22539	154	75	4	5.33333	2.59458	672|1820|6659|79733	BRCA1|ARID3A|SOX4|E2F8	-1.37301	Subtype_2
GO Biological Processes	19	GO:0044783	G1 DNA damage checkpoint	-2.74717	12.5217	5.65788	22539	72	75	3	4	2.26274	1820|6659|79733	ARID3A|SOX4|E2F8	-1.36739	Subtype_2
GO Biological Processes	19	GO:0032481	positive regulation of type I interferon production	-2.74717	12.5217	5.65788	22539	72	75	3	4	2.26274	2547|3148|10623	XRCC6|HMGB2|POLR3C	-1.36739	Subtype_2
GO Biological Processes	19	GO:0032652	regulation of interleukin-1 production	-2.74717	12.5217	5.65788	22539	72	75	3	4	2.26274	3065|3066|9971	HDAC1|HDAC2|NR1H4	-1.36739	Subtype_2
GO Biological Processes	19	GO:0019827	stem cell population maintenance	-2.7471	7.75535	4.87629	22539	155	75	4	5.33333	2.59458	5433|6299|6659|9079	POLR2D|SALL1|SOX4|LDB2	-1.36739	Subtype_2
GO Biological Processes	19	GO:0035710	CD4-positive, alpha-beta T cell activation	-2.72998	12.3501	5.61235	22539	73	75	3	4	2.26274	4602|6095|6097	MYB|RORA|RORC	-1.35442	Subtype_2
GO Biological Processes	19	GO:0046883	regulation of hormone secretion	-2.72601	5.69167	4.43063	22539	264	75	5	6.66667	2.88033	3065|4602|6659|8431|9971	HDAC1|MYB|SOX4|NR0B2|NR1H4	-1.35096	Subtype_2
GO Biological Processes	19	GO:0001822	kidney development	-2.71885	5.67019	4.41879	22539	265	75	5	6.66667	2.88033	4091|6299|6659|7020|7704	SMAD6|SALL1|SOX4|TFAP2A|ZBTB16	-1.34432	Subtype_2
GO Biological Processes	19	GO:0034614	cellular response to reactive oxygen species	-2.71673	7.6081	4.81626	22539	158	75	4	5.33333	2.59458	2146|3066|4602|7703	EZH2|HDAC2|MYB|PCGF2	-1.34323	Subtype_2
Canonical Pathways	11	M40	PID E2F PATHWAY	-2.71304	12.1832	5.56769	22539	74	75	3	4	2.26274	672|1871|3065	BRCA1|E2F3|HDAC1	-1.34108	Subtype_2
GO Biological Processes	19	GO:0009201	ribonucleoside triphosphate biosynthetic process	-2.70675	7.56025	4.7966	22539	159	75	4	5.33333	2.59458	142|2023|10891|51085	PARP1|ENO1|PPARGC1A|MLXIPL	-1.33632	Subtype_2
GO Biological Processes	19	GO:0060537	muscle tissue development	-2.69806	4.57645	4.13816	22539	394	75	6	8	3.13262	688|1831|3131|4223|5307|10891	KLF5|TSC22D3|HLF|MEOX2|PITX1|PPARGC1A	-1.32882	Subtype_2
Reactome Gene Sets	6	R-HSA-5633007	Regulation of TP53 Activity	-2.69683	7.513	4.77711	22539	160	75	4	5.33333	2.59458	580|672|3065|3066	BARD1|BRCA1|HDAC1|HDAC2	-1.32882	Subtype_2
GO Biological Processes	19	GO:1903312	negative regulation of mRNA metabolic process	-2.69634	12.0208	5.52389	22539	75	75	3	4	2.26274	580|10140|10921	BARD1|TOB1|RNPS1	-1.32882	Subtype_2
GO Biological Processes	19	GO:1902275	regulation of chromatin organization	-2.68699	7.46634	4.75779	22539	161	75	4	5.33333	2.59458	672|3159|4602|10891	BRCA1|HMGA1|MYB|PPARGC1A	-1.32128	Subtype_2
Reactome Gene Sets	6	R-HSA-69304	Regulation of DNA replication	-2.67988	11.8626	5.48091	22539	76	75	3	4	2.26274	1871|4171|4175	E2F3|MCM2|MCM6	-1.31805	Subtype_2
Reactome Gene Sets	6	R-HSA-3108214	SUMOylation of DNA damage response and repair proteins	-2.67988	11.8626	5.48091	22539	76	75	3	4	2.26274	142|672|7703	PARP1|BRCA1|PCGF2	-1.31805	Subtype_2
GO Biological Processes	19	GO:0031570	DNA integrity checkpoint	-2.66751	7.37472	4.71964	22539	163	75	4	5.33333	2.59458	672|1820|6659|79733	BRCA1|ARID3A|SOX4|E2F8	-1.30817	Subtype_2
GO Biological Processes	19	GO:2001022	positive regulation of response to DNA damage stimulus	-2.66366	11.7086	5.43873	22539	77	75	3	4	2.26274	142|672|2305	PARP1|BRCA1|FOXM1	-1.30707	Subtype_2
GO Biological Processes	19	GO:0048469	cell maturation	-2.65787	7.32976	4.7008	22539	164	75	4	5.33333	2.59458	3202|9319|29842|53335	HOXA5|TRIP13|TFCP2L1|BCL11A	-1.30397	Subtype_2
GO Biological Processes	19	GO:0009168	purine ribonucleoside monophosphate biosynthetic process	-2.65787	7.32976	4.7008	22539	164	75	4	5.33333	2.59458	142|2023|10891|51085	PARP1|ENO1|PPARGC1A|MLXIPL	-1.30397	Subtype_2
GO Biological Processes	19	GO:0009127	purine nucleoside monophosphate biosynthetic process	-2.65787	7.32976	4.7008	22539	164	75	4	5.33333	2.59458	142|2023|10891|51085	PARP1|ENO1|PPARGC1A|MLXIPL	-1.30397	Subtype_2
Reactome Gene Sets	6	R-HSA-3247509	Chromatin modifying enzymes	-2.64894	5.464	4.30362	22539	275	75	5	6.66667	2.88033	2146|3065|3066|6602|51317	EZH2|HDAC1|HDAC2|SMARCD1|PHF21A	-1.29889	Subtype_2
Reactome Gene Sets	6	R-HSA-4839726	Chromatin organization	-2.64894	5.464	4.30362	22539	275	75	5	6.66667	2.88033	2146|3065|3066|6602|51317	EZH2|HDAC1|HDAC2|SMARCD1|PHF21A	-1.29889	Subtype_2
GO Biological Processes	19	GO:0010565	regulation of cellular ketone metabolic process	-2.64829	7.28533	4.68213	22539	165	75	4	5.33333	2.59458	672|9971|10891|51085	BRCA1|NR1H4|PPARGC1A|MLXIPL	-1.29889	Subtype_2
GO Biological Processes	19	GO:0071466	cellular response to xenobiotic stimulus	-2.64829	7.28533	4.68213	22539	165	75	4	5.33333	2.59458	6095|6097|8856|10891	RORA|RORC|NR1I2|PPARGC1A	-1.29889	Subtype_2
GO Biological Processes	19	GO:1901216	positive regulation of neuron death	-2.64766	11.5585	5.39732	22539	78	75	3	4	2.26274	142|4602|7020	PARP1|MYB|TFAP2A	-1.29889	Subtype_2
GO Biological Processes	19	GO:0006303	double-strand break repair via nonhomologous end joining	-2.64766	11.5585	5.39732	22539	78	75	3	4	2.26274	580|672|2547	BARD1|BRCA1|XRCC6	-1.29889	Subtype_2
Reactome Gene Sets	6	R-HSA-5693532	DNA Double-Strand Break Repair	-2.63878	7.24145	4.66361	22539	166	75	4	5.33333	2.59458	142|580|672|2547	PARP1|BARD1|BRCA1|XRCC6	-1.29267	Subtype_2
Canonical Pathways	11	M66	PID MYC ACTIV PATHWAY	-2.63187	11.4122	5.35666	22539	79	75	3	4	2.26274	1871|2023|3159	E2F3|ENO1|HMGA1	-1.28769	Subtype_2
Reactome Gene Sets	6	R-HSA-69481	G2/M Checkpoints	-2.61995	7.15524	4.62702	22539	168	75	4	5.33333	2.59458	580|672|4171|4175	BARD1|BRCA1|MCM2|MCM6	-1.27756	Subtype_2
Canonical Pathways	11	M223	PID BETA CATENIN NUC PATHWAY	-2.61631	11.2695	5.31672	22539	80	75	3	4	2.26274	367|3065|3066	AR|HDAC1|HDAC2	-1.27547	Subtype_2
GO Biological Processes	19	GO:0070542	response to fatty acid	-2.61631	11.2695	5.31672	22539	80	75	3	4	2.26274	6602|9971|10891	SMARCD1|NR1H4|PPARGC1A	-1.27547	Subtype_2
GO Biological Processes	19	GO:1901214	regulation of neuron death	-2.60841	5.34733	4.23719	22539	281	75	5	6.66667	2.88033	142|3065|4602|7020|10891	PARP1|HDAC1|MYB|TFAP2A|PPARGC1A	-1.27063	Subtype_2
GO Biological Processes	19	GO:0072001	renal system development	-2.60841	5.34733	4.23719	22539	281	75	5	6.66667	2.88033	4091|6299|6659|7020|7704	SMAD6|SALL1|SOX4|TFAP2A|ZBTB16	-1.27063	Subtype_2
GO Biological Processes	19	GO:0009142	nucleoside triphosphate biosynthetic process	-2.60138	7.07106	4.59103	22539	170	75	4	5.33333	2.59458	142|2023|10891|51085	PARP1|ENO1|PPARGC1A|MLXIPL	-1.26481	Subtype_2
GO Biological Processes	19	GO:0032612	interleukin-1 production	-2.58579	10.9946	5.23893	22539	82	75	3	4	2.26274	3065|3066|9971	HDAC1|HDAC2|NR1H4	-1.25158	Subtype_2
GO Biological Processes	19	GO:0050810	regulation of steroid biosynthetic process	-2.58579	10.9946	5.23893	22539	82	75	3	4	2.26274	9971|10891|23541	NR1H4|PPARGC1A|SEC14L2	-1.25158	Subtype_2
GO Biological Processes	19	GO:1903708	positive regulation of hemopoiesis	-2.58304	6.98884	4.55562	22539	172	75	4	5.33333	2.59458	3148|3202|4602|7704	HMGB2|HOXA5|MYB|ZBTB16	-1.2507	Subtype_2
GO Biological Processes	19	GO:0050796	regulation of insulin secretion	-2.58304	6.98884	4.55562	22539	172	75	4	5.33333	2.59458	3065|6659|8431|9971	HDAC1|SOX4|NR0B2|NR1H4	-1.2507	Subtype_2
GO Biological Processes	19	GO:0001568	blood vessel development	-2.58049	3.34841	3.69525	22539	718	75	8	10.6667	3.56443	672|688|3202|4091|4223|6095|6659|79733	BRCA1|KLF5|HOXA5|SMAD6|MEOX2|RORA|SOX4|E2F8	-1.24995	Subtype_2
GO Biological Processes	19	GO:0071356	cellular response to tumor necrosis factor	-2.57539	5.25385	4.18326	22539	286	75	5	6.66667	2.88033	672|3065|6095|9971|10891	BRCA1|HDAC1|RORA|NR1H4|PPARGC1A	-1.24622	Subtype_2
GO Biological Processes	19	GO:1901990	regulation of mitotic cell cycle phase transition	-2.5753	4.32403	3.95882	22539	417	75	6	8	3.13262	672|1820|2146|6659|9319|79733	BRCA1|ARID3A|EZH2|SOX4|TRIP13|E2F8	-1.24622	Subtype_2
Reactome Gene Sets	6	R-HSA-983231	Factors involved in megakaryocyte development and platelet production	-2.57397	6.94844	4.53813	22539	173	75	4	5.33333	2.59458	3065|3066|4602|51317	HDAC1|HDAC2|MYB|PHF21A	-1.24535	Subtype_2
GO Biological Processes	19	GO:0031058	positive regulation of histone modification	-2.57084	10.8622	5.20104	22539	83	75	3	4	2.26274	672|4602|10891	BRCA1|MYB|PPARGC1A	-1.24361	Subtype_2
GO Biological Processes	19	GO:0044728	DNA methylation or demethylation	-2.57084	10.8622	5.20104	22539	83	75	3	4	2.26274	142|672|2146	PARP1|BRCA1|EZH2	-1.24361	Subtype_2
GO Biological Processes	19	GO:0007389	pattern specification process	-2.56502	4.30339	3.94384	22539	419	75	6	8	3.13262	367|3202|4091|4223|7703|7704	AR|HOXA5|SMAD6|MEOX2|PCGF2|ZBTB16	-1.24231	Subtype_2
GO Biological Processes	19	GO:0006109	regulation of carbohydrate metabolic process	-2.56495	6.90851	4.52077	22539	174	75	4	5.33333	2.59458	6095|6097|10891|51085	RORA|RORC|PPARGC1A|MLXIPL	-1.24231	Subtype_2
GO Biological Processes	19	GO:2000045	regulation of G1/S transition of mitotic cell cycle	-2.56495	6.90851	4.52077	22539	174	75	4	5.33333	2.59458	1820|2146|6659|79733	ARID3A|EZH2|SOX4|E2F8	-1.24231	Subtype_2
GO Biological Processes	19	GO:0019217	regulation of fatty acid metabolic process	-2.55607	10.7329	5.16379	22539	84	75	3	4	2.26274	672|10891|51085	BRCA1|PPARGC1A|MLXIPL	-1.23526	Subtype_2
Reactome Gene Sets	6	R-HSA-381340	Transcriptional regulation of white adipocyte differentiation	-2.55607	10.7329	5.16379	22539	84	75	3	4	2.26274	688|1052|10891	KLF5|CEBPD|PPARGC1A	-1.23526	Subtype_2
GO Biological Processes	19	GO:0042475	odontogenesis of dentin-containing tooth	-2.55607	10.7329	5.16379	22539	84	75	3	4	2.26274	3065|3066|4782	HDAC1|HDAC2|NFIC	-1.23526	Subtype_2
GO Biological Processes	19	GO:0072330	monocarboxylic acid biosynthetic process	-2.54947	5.18138	4.14103	22539	290	75	5	6.66667	2.88033	672|2023|9971|10891|51085	BRCA1|ENO1|NR1H4|PPARGC1A|MLXIPL	-1.23048	Subtype_2
Reactome Gene Sets	6	R-HSA-69002	DNA Replication Pre-Initiation	-2.5415	10.6066	5.12716	22539	85	75	3	4	2.26274	1871|4171|4175	E2F3|MCM2|MCM6	-1.22522	Subtype_2
GO Biological Processes	19	GO:0000726	non-recombinational repair	-2.5415	10.6066	5.12716	22539	85	75	3	4	2.26274	580|672|2547	BARD1|BRCA1|XRCC6	-1.22522	Subtype_2
Reactome Gene Sets	6	R-HSA-68874	M/G1 Transition	-2.5415	10.6066	5.12716	22539	85	75	3	4	2.26274	1871|4171|4175	E2F3|MCM2|MCM6	-1.22522	Subtype_2
GO Biological Processes	19	GO:0009156	ribonucleoside monophosphate biosynthetic process	-2.53824	6.79141	4.46952	22539	177	75	4	5.33333	2.59458	142|2023|10891|51085	PARP1|ENO1|PPARGC1A|MLXIPL	-1.22286	Subtype_2
GO Biological Processes	19	GO:0006611	protein export from nucleus	-2.52945	6.75326	4.4527	22539	178	75	4	5.33333	2.59458	580|5433|6659|10921	BARD1|POLR2D|SOX4|RNPS1	-1.21676	Subtype_2
GO Biological Processes	19	GO:0034728	nucleosome organization	-2.52945	6.75326	4.4527	22539	178	75	4	5.33333	2.59458	3148|3159|4171|6602	HMGB2|HMGA1|MCM2|SMARCD1	-1.21676	Subtype_2
GO Biological Processes	19	GO:0045981	positive regulation of nucleotide metabolic process	-2.5129	10.3628	5.05569	22539	87	75	3	4	2.26274	2023|10891|51085	ENO1|PPARGC1A|MLXIPL	-1.20421	Subtype_2
GO Biological Processes	19	GO:1900544	positive regulation of purine nucleotide metabolic process	-2.5129	10.3628	5.05569	22539	87	75	3	4	2.26274	2023|10891|51085	ENO1|PPARGC1A|MLXIPL	-1.20421	Subtype_2
KEGG Pathway	24	hsa05202	Transcriptional misregulation in cancer	-2.51204	6.67822	4.41944	22539	180	75	4	5.33333	2.59458	2118|3065|3066|7704	ETV4|HDAC1|HDAC2|ZBTB16	-1.20379	Subtype_2
GO Biological Processes	19	GO:0048608	reproductive structure development	-2.50952	4.1933	3.86309	22539	430	75	6	8	3.13262	367|2099|3148|6299|7942|79733	AR|ESR1|HMGB2|SALL1|TFEB|E2F8	-1.20194	Subtype_2
GO Biological Processes	19	GO:0001942	hair follicle development	-2.49887	10.245	5.02083	22539	88	75	3	4	2.26274	3065|3066|9079	HDAC1|HDAC2|LDB2	-1.19371	Subtype_2
GO Biological Processes	19	GO:0061458	reproductive system development	-2.49469	4.16425	3.84153	22539	433	75	6	8	3.13262	367|2099|3148|6299|7942|79733	AR|ESR1|HMGB2|SALL1|TFEB|E2F8	-1.19128	Subtype_2
KEGG Pathway	24	hsa05206	MicroRNAs in cancer	-2.49265	5.02542	4.04878	22539	299	75	5	6.66667	2.88033	672|1871|2146|3065|6659	BRCA1|E2F3|EZH2|HDAC1|SOX4	-1.19012	Subtype_2
GO Biological Processes	19	GO:0001944	vasculature development	-2.48972	3.23575	3.58075	22539	743	75	8	10.6667	3.56443	672|688|3202|4091|4223|6095|6659|79733	BRCA1|KLF5|HOXA5|SMAD6|MEOX2|RORA|SOX4|E2F8	-1.18806	Subtype_2
GO Biological Processes	19	GO:0006694	steroid biosynthetic process	-2.47786	6.53304	4.35442	22539	184	75	4	5.33333	2.59458	9971|10891|23541|29842	NR1H4|PPARGC1A|SEC14L2|TFCP2L1	-1.17967	Subtype_2
GO Biological Processes	19	GO:0061138	morphogenesis of a branching epithelium	-2.47786	6.53304	4.35442	22539	184	75	4	5.33333	2.59458	367|2099|3202|6299	AR|ESR1|HOXA5|SALL1	-1.17967	Subtype_2
GO Biological Processes	19	GO:0030278	regulation of ossification	-2.47786	6.53304	4.35442	22539	184	75	4	5.33333	2.59458	4091|7020|7704|10140	SMAD6|TFAP2A|ZBTB16|TOB1	-1.17967	Subtype_2
GO Biological Processes	19	GO:0022404	molting cycle process	-2.47131	10.0173	4.95274	22539	90	75	3	4	2.26274	3065|3066|9079	HDAC1|HDAC2|LDB2	-1.17614	Subtype_2
GO Biological Processes	19	GO:0022405	hair cycle process	-2.47131	10.0173	4.95274	22539	90	75	3	4	2.26274	3065|3066|9079	HDAC1|HDAC2|LDB2	-1.17614	Subtype_2
GO Biological Processes	19	GO:0098773	skin epidermis development	-2.47131	10.0173	4.95274	22539	90	75	3	4	2.26274	3065|3066|9079	HDAC1|HDAC2|LDB2	-1.17614	Subtype_2
GO Biological Processes	19	GO:0031124	mRNA 3'-end processing	-2.47131	10.0173	4.95274	22539	90	75	3	4	2.26274	580|5433|10921	BARD1|POLR2D|RNPS1	-1.17614	Subtype_2
GO Biological Processes	19	GO:1905269	positive regulation of chromatin organization	-2.47131	10.0173	4.95274	22539	90	75	3	4	2.26274	672|4602|10891	BRCA1|MYB|PPARGC1A	-1.17614	Subtype_2
GO Biological Processes	19	GO:0097190	apoptotic signaling pathway	-2.468	3.57762	3.65953	22539	588	75	7	9.33333	3.35901	142|367|672|2023|3148|7703|10625	PARP1|AR|BRCA1|ENO1|HMGB2|PCGF2|IVNS1ABP	-1.17471	Subtype_2
GO Biological Processes	19	GO:0034612	response to tumor necrosis factor	-2.46195	4.94276	3.99911	22539	304	75	5	6.66667	2.88033	672|3065|6095|9971|10891	BRCA1|HDAC1|RORA|NR1H4|PPARGC1A	-1.16977	Subtype_2
GO Biological Processes	19	GO:0072358	cardiovascular system development	-2.46152	3.20128	3.54512	22539	751	75	8	10.6667	3.56443	672|688|3202|4091|4223|6095|6659|79733	BRCA1|KLF5|HOXA5|SMAD6|MEOX2|RORA|SOX4|E2F8	-1.16977	Subtype_2
GO Biological Processes	19	GO:0009124	nucleoside monophosphate biosynthetic process	-2.45278	6.42824	4.30691	22539	187	75	4	5.33333	2.59458	142|2023|10891|51085	PARP1|ENO1|PPARGC1A|MLXIPL	-1.16315	Subtype_2
GO Biological Processes	19	GO:0090277	positive regulation of peptide hormone secretion	-2.44442	9.79957	4.88676	22539	92	75	3	4	2.26274	6659|8431|9971	SOX4|NR0B2|NR1H4	-1.15605	Subtype_2
GO Biological Processes	19	GO:0046879	hormone secretion	-2.43185	4.86278	3.95052	22539	309	75	5	6.66667	2.88033	3065|4602|6659|8431|9971	HDAC1|MYB|SOX4|NR0B2|NR1H4	-1.14643	Subtype_2
GO Biological Processes	19	GO:0048704	embryonic skeletal system morphogenesis	-2.43121	9.69419	4.85452	22539	93	75	3	4	2.26274	3202|7020|7703	HOXA5|TFAP2A|PCGF2	-1.14621	Subtype_2
GO Biological Processes	19	GO:0006006	glucose metabolic process	-2.42815	6.32674	4.26043	22539	190	75	4	5.33333	2.59458	2023|6095|6097|10891	ENO1|RORA|RORC|PPARGC1A	-1.14441	Subtype_2
GO Biological Processes	19	GO:0021549	cerebellum development	-2.41815	9.59106	4.82276	22539	94	75	3	4	2.26274	2146|6095|10891	EZH2|RORA|PPARGC1A	-1.13649	Subtype_2
Reactome Gene Sets	6	R-HSA-3214815	HDACs deacetylate histones	-2.41815	9.59106	4.82276	22539	94	75	3	4	2.26274	3065|3066|51317	HDAC1|HDAC2|PHF21A	-1.13649	Subtype_2
GO Biological Processes	19	GO:1903706	regulation of hemopoiesis	-2.41766	4.01586	3.72976	22539	449	75	6	8	3.13262	3065|3148|3202|4602|6938|7704	HDAC1|HMGB2|HOXA5|MYB|TCF12|ZBTB16	-1.13642	Subtype_2
GO Biological Processes	19	GO:0032496	response to lipopolysaccharide	-2.41406	4.81603	3.92187	22539	312	75	5	6.66667	2.88033	3065|3066|3148|9971|10891	HDAC1|HDAC2|HMGB2|NR1H4|PPARGC1A	-1.13448	Subtype_2
GO Biological Processes	19	GO:1902806	regulation of cell cycle G1/S phase transition	-2.41198	6.26083	4.23	22539	192	75	4	5.33333	2.59458	1820|2146|6659|79733	ARID3A|EZH2|SOX4|E2F8	-1.13364	Subtype_2
GO Biological Processes	19	GO:0006333	chromatin assembly or disassembly	-2.41198	6.26083	4.23	22539	192	75	4	5.33333	2.59458	3148|3159|4171|6602	HMGB2|HMGA1|MCM2|SMARCD1	-1.13364	Subtype_2
GO Biological Processes	19	GO:1900542	regulation of purine nucleotide metabolic process	-2.41198	6.26083	4.23	22539	192	75	4	5.33333	2.59458	142|2023|10891|51085	PARP1|ENO1|PPARGC1A|MLXIPL	-1.13364	Subtype_2
KEGG Pathway	24	hsa05016	Huntington's disease	-2.40397	6.22839	4.21494	22539	193	75	4	5.33333	2.59458	3065|3066|5433|10891	HDAC1|HDAC2|POLR2D|PPARGC1A	-1.12732	Subtype_2
GO Biological Processes	19	GO:1901987	regulation of cell cycle phase transition	-2.4036	3.9892	3.70938	22539	452	75	6	8	3.13262	672|1820|2146|6659|9319|79733	BRCA1|ARID3A|EZH2|SOX4|TRIP13|E2F8	-1.12732	Subtype_2
GO Biological Processes	19	GO:0001701	in utero embryonic development	-2.40232	4.78535	3.90297	22539	314	75	5	6.66667	2.88033	367|1999|7703|7942|79733	AR|ELF3|PCGF2|TFEB|E2F8	-1.12691	Subtype_2
GO Biological Processes	19	GO:0010906	regulation of glucose metabolic process	-2.39248	9.39125	4.76065	22539	96	75	3	4	2.26274	6095|6097|10891	RORA|RORC|PPARGC1A	-1.11948	Subtype_2
GO Biological Processes	19	GO:0002286	T cell activation involved in immune response	-2.39248	9.39125	4.76065	22539	96	75	3	4	2.26274	4602|6095|6097	MYB|RORA|RORC	-1.11948	Subtype_2
GO Biological Processes	19	GO:0006282	regulation of DNA repair	-2.39248	9.39125	4.76065	22539	96	75	3	4	2.26274	142|672|2305	PARP1|BRCA1|FOXM1	-1.11948	Subtype_2
GO Biological Processes	19	GO:0060562	epithelial tube morphogenesis	-2.39066	4.75506	3.88422	22539	316	75	5	6.66667	2.88033	367|2099|3202|6299|6659	AR|ESR1|HOXA5|SALL1|SOX4	-1.1189	Subtype_2
Reactome Gene Sets	6	R-HSA-73894	DNA Repair	-2.38487	4.74006	3.87491	22539	317	75	5	6.66667	2.88033	142|580|672|2547|5433	PARP1|BARD1|BRCA1|XRCC6|POLR2D	-1.11511	Subtype_2
GO Biological Processes	19	GO:0034655	nucleobase-containing compound catabolic process	-2.38087	3.44859	3.54255	22539	610	75	7	9.33333	3.35901	2023|3148|5433|10140|10891|10921|51085	ENO1|HMGB2|POLR2D|TOB1|PPARGC1A|RNPS1|MLXIPL	-1.11232	Subtype_2
Reactome Gene Sets	6	R-HSA-193704	p75 NTR receptor-mediated signalling	-2.37987	9.29443	4.73028	22539	97	75	3	4	2.26274	3065|3066|11108	HDAC1|HDAC2|PRDM4	-1.11173	Subtype_2
GO Biological Processes	19	GO:0042110	T cell activation	-2.37582	3.93694	3.66914	22539	458	75	6	8	3.13262	2000|4602|6095|6097|6659|7704	ELF4|MYB|RORA|RORC|SOX4|ZBTB16	-1.10967	Subtype_2
GO Biological Processes	19	GO:0003300	cardiac muscle hypertrophy	-2.3674	9.19959	4.70034	22539	98	75	3	4	2.26274	142|2146|3066	PARP1|EZH2|HDAC2	-1.10247	Subtype_2
GO Biological Processes	19	GO:0051168	nuclear export	-2.36459	6.07111	4.14123	22539	198	75	4	5.33333	2.59458	580|5433|6659|10921	BARD1|POLR2D|SOX4|RNPS1	-1.10046	Subtype_2
GO Biological Processes	19	GO:0009914	hormone transport	-2.36191	4.681	3.83805	22539	321	75	5	6.66667	2.88033	3065|4602|6659|8431|9971	HDAC1|MYB|SOX4|NR0B2|NR1H4	-1.09818	Subtype_2
GO Biological Processes	19	GO:0006140	regulation of nucleotide metabolic process	-2.35685	6.0406	4.12679	22539	199	75	4	5.33333	2.59458	142|2023|10891|51085	PARP1|ENO1|PPARGC1A|MLXIPL	-1.09529	Subtype_2
GO Biological Processes	19	GO:0006096	glycolytic process	-2.35506	9.10667	4.67082	22539	99	75	3	4	2.26274	2023|10891|51085	ENO1|PPARGC1A|MLXIPL	-1.09412	Subtype_2
GO Biological Processes	19	GO:0014897	striated muscle hypertrophy	-2.34286	9.0156	4.64172	22539	100	75	3	4	2.26274	142|2146|3066	PARP1|EZH2|HDAC2	-1.08508	Subtype_2
GO Biological Processes	19	GO:0003279	cardiac septum development	-2.34286	9.0156	4.64172	22539	100	75	3	4	2.26274	4091|6299|6659	SMAD6|SALL1|SOX4	-1.08508	Subtype_2
GO Biological Processes	19	GO:0006757	ATP generation from ADP	-2.34286	9.0156	4.64172	22539	100	75	3	4	2.26274	2023|10891|51085	ENO1|PPARGC1A|MLXIPL	-1.08508	Subtype_2
GO Biological Processes	19	GO:0009952	anterior/posterior pattern specification	-2.3339	5.95089	4.08405	22539	202	75	4	5.33333	2.59458	3202|4223|7703|7704	HOXA5|MEOX2|PCGF2|ZBTB16	-1.07808	Subtype_2
GO Biological Processes	19	GO:0030073	insulin secretion	-2.3339	5.95089	4.08405	22539	202	75	4	5.33333	2.59458	3065|6659|8431|9971	HDAC1|SOX4|NR0B2|NR1H4	-1.07808	Subtype_2
GO Biological Processes	19	GO:0030098	lymphocyte differentiation	-2.3281	4.59511	3.78387	22539	327	75	5	6.66667	2.88033	4602|6095|6097|6659|7704	MYB|RORA|RORC|SOX4|ZBTB16	-1.07268	Subtype_2
GO Biological Processes	19	GO:0090276	regulation of peptide hormone secretion	-2.32634	5.92158	4.07	22539	203	75	4	5.33333	2.59458	3065|6659|8431|9971	HDAC1|SOX4|NR0B2|NR1H4	-1.07219	Subtype_2
KEGG Pathway	24	hsa05169	Epstein-Barr virus infection	-2.32634	5.92158	4.07	22539	203	75	4	5.33333	2.59458	3065|3066|5433|10623	HDAC1|HDAC2|POLR2D|POLR3C	-1.07219	Subtype_2
GO Biological Processes	19	GO:0006913	nucleocytoplasmic transport	-2.32605	3.84461	3.5971	22539	469	75	6	8	3.13262	142|580|5433|6659|10140|10921	PARP1|BARD1|POLR2D|SOX4|TOB1|RNPS1	-1.07219	Subtype_2
GO Biological Processes	19	GO:0014896	muscle hypertrophy	-2.31886	8.83882	4.58473	22539	102	75	3	4	2.26274	142|2146|3066	PARP1|EZH2|HDAC2	-1.06655	Subtype_2
GO Biological Processes	19	GO:0001823	mesonephros development	-2.31886	8.83882	4.58473	22539	102	75	3	4	2.26274	4091|6299|7704	SMAD6|SALL1|ZBTB16	-1.06655	Subtype_2
Reactome Gene Sets	6	R-HSA-9006936	Signaling by TGF-beta family members	-2.31886	8.83882	4.58473	22539	102	75	3	4	2.26274	142|3065|4091	PARP1|HDAC1|SMAD6	-1.06655	Subtype_2
GO Biological Processes	19	GO:0002237	response to molecule of bacterial origin	-2.317	4.56717	3.76611	22539	329	75	5	6.66667	2.88033	3065|3066|3148|9971|10891	HDAC1|HDAC2|HMGB2|NR1H4|PPARGC1A	-1.06508	Subtype_2
GO Biological Processes	19	GO:0022037	metencephalon development	-2.30705	8.75301	4.55681	22539	103	75	3	4	2.26274	2146|6095|10891	EZH2|RORA|PPARGC1A	-1.05785	Subtype_2
GO Biological Processes	19	GO:0034968	histone lysine methylation	-2.30705	8.75301	4.55681	22539	103	75	3	4	2.26274	672|2146|4602	BRCA1|EZH2|MYB	-1.05785	Subtype_2
GO Biological Processes	19	GO:0042866	pyruvate biosynthetic process	-2.30705	8.75301	4.55681	22539	103	75	3	4	2.26274	2023|10891|51085	ENO1|PPARGC1A|MLXIPL	-1.05785	Subtype_2
GO Biological Processes	19	GO:2001237	negative regulation of extrinsic apoptotic signaling pathway	-2.30705	8.75301	4.55681	22539	103	75	3	4	2.26274	367|672|3148	AR|BRCA1|HMGB2	-1.05785	Subtype_2
GO Biological Processes	19	GO:0006304	DNA modification	-2.2838	8.58629	4.5021	22539	105	75	3	4	2.26274	142|672|2146	PARP1|BRCA1|EZH2	-1.03959	Subtype_2
GO Biological Processes	19	GO:0046031	ADP metabolic process	-2.2838	8.58629	4.5021	22539	105	75	3	4	2.26274	2023|10891|51085	ENO1|PPARGC1A|MLXIPL	-1.03959	Subtype_2
GO Biological Processes	19	GO:0002521	leukocyte differentiation	-2.27773	3.7565	3.5272	22539	480	75	6	8	3.13262	142|4602|6095|6097|6659|7704	PARP1|MYB|RORA|RORC|SOX4|ZBTB16	-1.0339	Subtype_2
GO Biological Processes	19	GO:0044773	mitotic DNA damage checkpoint	-2.27236	8.50528	4.47529	22539	106	75	3	4	2.26274	1820|6659|79733	ARID3A|SOX4|E2F8	-1.03043	Subtype_2
GO Biological Processes	19	GO:0048514	blood vessel morphogenesis	-2.26841	3.28694	3.39138	22539	640	75	7	9.33333	3.35901	672|688|3202|4223|6095|6659|79733	BRCA1|KLF5|HOXA5|MEOX2|RORA|SOX4|E2F8	-1.02724	Subtype_2
GO Biological Processes	19	GO:0043279	response to alkaloid	-2.26104	8.42579	4.44883	22539	107	75	3	4	2.26274	3065|3066|10891	HDAC1|HDAC2|PPARGC1A	-1.02063	Subtype_2
Reactome Gene Sets	6	R-HSA-69306	DNA Replication	-2.24983	8.34778	4.42271	22539	108	75	3	4	2.26274	1871|4171|4175	E2F3|MCM2|MCM6	-1.01155	Subtype_2
Reactome Gene Sets	6	R-HSA-6785807	Interleukin-4 and 13 signaling	-2.24983	8.34778	4.42271	22539	108	75	3	4	2.26274	1052|6095|6097	CEBPD|RORA|RORC	-1.01155	Subtype_2
GO Biological Processes	19	GO:0008406	gonad development	-2.24587	5.6172	3.92134	22539	214	75	4	5.33333	2.59458	367|2099|3148|6299	AR|ESR1|HMGB2|SALL1	-1.00847	Subtype_2
GO Biological Processes	19	GO:0051224	negative regulation of protein transport	-2.23879	5.59107	3.90834	22539	215	75	4	5.33333	2.59458	580|3065|6659|9971	BARD1|HDAC1|SOX4|NR1H4	-1.00314	Subtype_2
GO Biological Processes	19	GO:0009636	response to toxic substance	-2.23078	3.67234	3.45934	22539	491	75	6	8	3.13262	2146|3065|3066|4602|7703|10891	EZH2|HDAC1|HDAC2|MYB|PCGF2|PPARGC1A	-0.997482	Subtype_2
GO Biological Processes	19	GO:0046700	heterocycle catabolic process	-2.21828	3.21657	3.32386	22539	654	75	7	9.33333	3.35901	2023|3148|5433|10140|10891|10921|51085	ENO1|HMGB2|POLR2D|TOB1|PPARGC1A|RNPS1|MLXIPL	-0.98915	Subtype_2
GO Biological Processes	19	GO:0033500	carbohydrate homeostasis	-2.21778	5.51413	3.86981	22539	218	75	4	5.33333	2.59458	6659|9971|10891|51085	SOX4|NR1H4|PPARGC1A|MLXIPL	-0.98915	Subtype_2
GO Biological Processes	19	GO:0042593	glucose homeostasis	-2.21778	5.51413	3.86981	22539	218	75	4	5.33333	2.59458	6659|9971|10891|51085	SOX4|NR1H4|PPARGC1A|MLXIPL	-0.98915	Subtype_2
GO Biological Processes	19	GO:0043500	muscle adaptation	-2.21689	8.12216	4.34633	22539	111	75	3	4	2.26274	142|2146|10891	PARP1|EZH2|PPARGC1A	-0.98915	Subtype_2
GO Biological Processes	19	GO:0002065	columnar/cuboidal epithelial cell differentiation	-2.21689	8.12216	4.34633	22539	111	75	3	4	2.26274	688|3202|6659	KLF5|HOXA5|SOX4	-0.98915	Subtype_2
GO Biological Processes	19	GO:0044270	cellular nitrogen compound catabolic process	-2.21123	3.20677	3.31436	22539	656	75	7	9.33333	3.35901	2023|3148|5433|10140|10891|10921|51085	ENO1|HMGB2|POLR2D|TOB1|PPARGC1A|RNPS1|MLXIPL	-0.984959	Subtype_2
GO Biological Processes	19	GO:1904950	negative regulation of establishment of protein localization	-2.21086	5.48895	3.85713	22539	219	75	4	5.33333	2.59458	580|3065|6659|9971	BARD1|HDAC1|SOX4|NR1H4	-0.984951	Subtype_2
GO Biological Processes	19	GO:0044774	mitotic DNA integrity checkpoint	-2.20612	8.04964	4.32151	22539	112	75	3	4	2.26274	1820|6659|79733	ARID3A|SOX4|E2F8	-0.982408	Subtype_2
GO Biological Processes	19	GO:0042303	molting cycle	-2.20612	8.04964	4.32151	22539	112	75	3	4	2.26274	3065|3066|9079	HDAC1|HDAC2|LDB2	-0.982408	Subtype_2
GO Biological Processes	19	GO:0042633	hair cycle	-2.20612	8.04964	4.32151	22539	112	75	3	4	2.26274	3065|3066|9079	HDAC1|HDAC2|LDB2	-0.982408	Subtype_2
GO Biological Processes	19	GO:0045137	development of primary sexual characteristics	-2.20397	5.464	3.84453	22539	220	75	4	5.33333	2.59458	367|2099|3148|6299	AR|ESR1|HMGB2|SALL1	-0.980614	Subtype_2
GO Biological Processes	19	GO:0032680	regulation of tumor necrosis factor production	-2.19547	7.97841	4.29699	22539	113	75	3	4	2.26274	3065|3066|9971	HDAC1|HDAC2|NR1H4	-0.975013	Subtype_2
GO Biological Processes	19	GO:0006805	xenobiotic metabolic process	-2.19547	7.97841	4.29699	22539	113	75	3	4	2.26274	6095|6097|8856	RORA|RORC|NR1I2	-0.975013	Subtype_2
GO Biological Processes	19	GO:0045089	positive regulation of innate immune response	-2.19489	4.26875	3.57148	22539	352	75	5	6.66667	2.88033	2099|2547|3148|9971|10623	ESR1|XRCC6|HMGB2|NR1H4|POLR3C	-0.974837	Subtype_2
GO Biological Processes	19	GO:0051101	regulation of DNA binding	-2.18491	7.90842	4.27277	22539	114	75	3	4	2.26274	142|3066|3148	PARP1|HDAC2|HMGB2	-0.968057	Subtype_2
KEGG Pathway	24	hsa04919	Thyroid hormone signaling pathway	-2.1641	7.77207	4.22521	22539	116	75	3	4	2.26274	2099|3065|3066	ESR1|HDAC1|HDAC2	-0.951174	Subtype_2
GO Biological Processes	19	GO:0032640	tumor necrosis factor production	-2.1641	7.77207	4.22521	22539	116	75	3	4	2.26274	3065|3066|9971	HDAC1|HDAC2|NR1H4	-0.951174	Subtype_2
GO Biological Processes	19	GO:0018022	peptidyl-lysine methylation	-2.1641	7.77207	4.22521	22539	116	75	3	4	2.26274	672|2146|4602	BRCA1|EZH2|MYB	-0.951174	Subtype_2
GO Biological Processes	19	GO:0019439	aromatic compound catabolic process	-2.16269	3.13976	3.24888	22539	670	75	7	9.33333	3.35901	2023|3148|5433|10140|10891|10921|51085	ENO1|HMGB2|POLR2D|TOB1|PPARGC1A|RNPS1|MLXIPL	-0.950116	Subtype_2
GO Biological Processes	19	GO:1903555	regulation of tumor necrosis factor superfamily cytokine production	-2.15385	7.70564	4.20185	22539	117	75	3	4	2.26274	3065|3066|9971	HDAC1|HDAC2|NR1H4	-0.943751	Subtype_2
GO Biological Processes	19	GO:0006165	nucleoside diphosphate phosphorylation	-2.15385	7.70564	4.20185	22539	117	75	3	4	2.26274	2023|10891|51085	ENO1|PPARGC1A|MLXIPL	-0.943751	Subtype_2
GO Biological Processes	19	GO:0055088	lipid homeostasis	-2.15385	7.70564	4.20185	22539	117	75	3	4	2.26274	6095|9971|51085	RORA|NR1H4|MLXIPL	-0.943751	Subtype_2
GO Biological Processes	19	GO:0007346	regulation of mitotic cell cycle	-2.15246	3.12577	3.23506	22539	673	75	7	9.33333	3.35901	672|1820|2146|6659|9232|9319|79733	BRCA1|ARID3A|EZH2|SOX4|PTTG1|TRIP13|E2F8	-0.942719	Subtype_2
GO Biological Processes	19	GO:0045727	positive regulation of translation	-2.14369	7.64034	4.17877	22539	118	75	3	4	2.26274	2099|5433|6659	ESR1|POLR2D|SOX4	-0.935002	Subtype_2
GO Biological Processes	19	GO:0050767	regulation of neurogenesis	-2.13892	3.1073	3.21677	22539	677	75	7	9.33333	3.35901	2146|3065|3066|3148|4602|6938|53335	EZH2|HDAC1|HDAC2|HMGB2|MYB|TCF12|BCL11A	-0.931463	Subtype_2
GO Biological Processes	19	GO:0071560	cellular response to transforming growth factor beta stimulus	-2.137	5.22643	3.72257	22539	230	75	4	5.33333	2.59458	142|3066|4091|10891	PARP1|HDAC2|SMAD6|PPARGC1A	-0.931463	Subtype_2
GO Biological Processes	19	GO:0042180	cellular ketone metabolic process	-2.137	5.22643	3.72257	22539	230	75	4	5.33333	2.59458	672|9971|10891|51085	BRCA1|NR1H4|PPARGC1A|MLXIPL	-0.931463	Subtype_2
GO Biological Processes	19	GO:0022612	gland morphogenesis	-2.13363	7.57613	4.15596	22539	119	75	3	4	2.26274	367|1999|2099	AR|ELF3|ESR1	-0.928791	Subtype_2
GO Biological Processes	19	GO:0006342	chromatin silencing	-2.13363	7.57613	4.15596	22539	119	75	3	4	2.26274	3065|3066|3159	HDAC1|HDAC2|HMGA1	-0.928791	Subtype_2
GO Biological Processes	19	GO:0019318	hexose metabolic process	-2.13049	5.20381	3.71077	22539	231	75	4	5.33333	2.59458	2023|6095|6097|10891	ENO1|RORA|RORC|PPARGC1A	-0.926	Subtype_2
GO Biological Processes	19	GO:0010675	regulation of cellular carbohydrate metabolic process	-2.11378	7.45091	4.11112	22539	121	75	3	4	2.26274	6095|6097|10891	RORA|RORC|PPARGC1A	-0.913452	Subtype_2
GO Biological Processes	19	GO:0009179	purine ribonucleoside diphosphate metabolic process	-2.11378	7.45091	4.11112	22539	121	75	3	4	2.26274	2023|10891|51085	ENO1|PPARGC1A|MLXIPL	-0.913452	Subtype_2
GO Biological Processes	19	GO:0009135	purine nucleoside diphosphate metabolic process	-2.11378	7.45091	4.11112	22539	121	75	3	4	2.26274	2023|10891|51085	ENO1|PPARGC1A|MLXIPL	-0.913452	Subtype_2
GO Biological Processes	19	GO:0003231	cardiac ventricle development	-2.11378	7.45091	4.11112	22539	121	75	3	4	2.26274	4091|6299|6659	SMAD6|SALL1|SOX4	-0.913452	Subtype_2
GO Biological Processes	19	GO:0031123	RNA 3'-end processing	-2.11378	7.45091	4.11112	22539	121	75	3	4	2.26274	580|5433|10921	BARD1|POLR2D|RNPS1	-0.913452	Subtype_2
GO Biological Processes	19	GO:0071559	response to transforming growth factor beta	-2.11116	5.13709	3.67576	22539	234	75	4	5.33333	2.59458	142|3066|4091|10891	PARP1|HDAC2|SMAD6|PPARGC1A	-0.911173	Subtype_2
Reactome Gene Sets	6	R-HSA-5617472	Activation of anterior HOX genes in hindbrain development during early embryogenesis	-2.104	7.38984	4.08908	22539	122	75	3	4	2.26274	2146|5433|7703	EZH2|POLR2D|PCGF2	-0.905729	Subtype_2
GO Biological Processes	19	GO:0032479	regulation of type I interferon production	-2.104	7.38984	4.08908	22539	122	75	3	4	2.26274	2547|3148|10623	XRCC6|HMGB2|POLR3C	-0.905729	Subtype_2
Reactome Gene Sets	6	R-HSA-5619507	Activation of HOX genes during differentiation	-2.104	7.38984	4.08908	22539	122	75	3	4	2.26274	2146|5433|7703	EZH2|POLR2D|PCGF2	-0.905729	Subtype_2
GO Biological Processes	19	GO:0071706	tumor necrosis factor superfamily cytokine production	-2.104	7.38984	4.08908	22539	122	75	3	4	2.26274	3065|3066|9971	HDAC1|HDAC2|NR1H4	-0.905729	Subtype_2
GO Biological Processes	19	GO:0045787	positive regulation of cell cycle	-2.10114	4.05013	3.42285	22539	371	75	5	6.66667	2.88033	672|1820|6659|51085|79733	BRCA1|ARID3A|SOX4|MLXIPL|E2F8	-0.903217	Subtype_2
GO Biological Processes	19	GO:0032606	type I interferon production	-2.0943	7.32976	4.06729	22539	123	75	3	4	2.26274	2547|3148|10623	XRCC6|HMGB2|POLR3C	-0.899791	Subtype_2
GO Biological Processes	19	GO:0048706	embryonic skeletal system development	-2.0943	7.32976	4.06729	22539	123	75	3	4	2.26274	3202|7020|7703	HOXA5|TFAP2A|PCGF2	-0.899791	Subtype_2
GO Biological Processes	19	GO:0045834	positive regulation of lipid metabolic process	-2.0943	7.32976	4.06729	22539	123	75	3	4	2.26274	9971|10891|51085	NR1H4|PPARGC1A|MLXIPL	-0.899791	Subtype_2
GO Biological Processes	19	GO:0046939	nucleotide phosphorylation	-2.0943	7.32976	4.06729	22539	123	75	3	4	2.26274	2023|10891|51085	ENO1|PPARGC1A|MLXIPL	-0.899791	Subtype_2
GO Biological Processes	19	GO:0009185	ribonucleoside diphosphate metabolic process	-2.0943	7.32976	4.06729	22539	123	75	3	4	2.26274	2023|10891|51085	ENO1|PPARGC1A|MLXIPL	-0.899791	Subtype_2
GO Biological Processes	19	GO:0034504	protein localization to nucleus	-2.08688	4.01765	3.40028	22539	374	75	5	6.66667	2.88033	142|580|6659|7704|10140	PARP1|BARD1|SOX4|ZBTB16|TOB1	-0.893731	Subtype_2
GO Biological Processes	19	GO:0048872	homeostasis of number of cells	-2.08583	5.05076	3.63	22539	238	75	4	5.33333	2.59458	1831|2146|3148|3202	TSC22D3|EZH2|HMGB2|HOXA5	-0.893024	Subtype_2
GO Biological Processes	19	GO:0032355	response to estradiol	-2.08469	7.27065	4.04574	22539	124	75	3	4	2.26274	2099|2146|10891	ESR1|EZH2|PPARGC1A	-0.892218	Subtype_2
Reactome Gene Sets	6	R-HSA-5663202	Diseases of signal transduction	-2.07745	3.99628	3.38537	22539	376	75	5	6.66667	2.88033	2099|3065|3066|5433|8805	ESR1|HDAC1|HDAC2|POLR2D|TRIM24	-0.88656	Subtype_2
GO Biological Processes	19	GO:0002009	morphogenesis of an epithelium	-2.07457	3.40211	3.23352	22539	530	75	6	8	3.13262	367|2099|3202|6299|6659|7020	AR|ESR1|HOXA5|SALL1|SOX4|TFAP2A	-0.884127	Subtype_2
GO Biological Processes	19	GO:0014706	striated muscle tissue development	-2.07275	3.98568	3.37795	22539	377	75	5	6.66667	2.88033	688|1831|3131|4223|5307	KLF5|TSC22D3|HLF|MEOX2|PITX1	-0.882988	Subtype_2
GO Biological Processes	19	GO:1901361	organic cyclic compound catabolic process	-2.0631	3.0052	3.11412	22539	700	75	7	9.33333	3.35901	2023|3148|5433|10140|10891|10921|51085	ENO1|HMGB2|POLR2D|TOB1|PPARGC1A|RNPS1|MLXIPL	-0.875012	Subtype_2
GO Biological Processes	19	GO:0030072	peptide hormone secretion	-2.05487	4.94683	3.57423	22539	243	75	4	5.33333	2.59458	3065|6659|8431|9971	HDAC1|SOX4|NR0B2|NR1H4	-0.868119	Subtype_2
GO Biological Processes	19	GO:0045637	regulation of myeloid cell differentiation	-2.05487	4.94683	3.57423	22539	243	75	4	5.33333	2.59458	3065|3148|3202|7704	HDAC1|HMGB2|HOXA5|ZBTB16	-0.868119	Subtype_2
Reactome Gene Sets	6	R-HSA-69278	Cell Cycle, Mitotic	-2.05185	3.36403	3.20066	22539	536	75	6	8	3.13262	1871|2305|3065|4171|4175|9232	E2F3|FOXM1|HDAC1|MCM2|MCM6|PTTG1	-0.866103	Subtype_2
GO Biological Processes	19	GO:0065004	protein-DNA complex assembly	-2.04876	4.92656	3.56326	22539	244	75	4	5.33333	2.59458	142|2099|3148|4171	PARP1|ESR1|HMGB2|MCM2	-0.864017	Subtype_2
GO Biological Processes	19	GO:1902532	negative regulation of intracellular signal transduction	-2.04435	3.35152	3.18981	22539	538	75	6	8	3.13262	2023|2099|2305|6095|9971|10625	ENO1|ESR1|FOXM1|RORA|NR1H4|IVNS1ABP	-0.8606	Subtype_2
Reactome Gene Sets	6	R-HSA-69206	G1/S Transition	-2.03789	6.98884	3.9415	22539	129	75	3	4	2.26274	3065|4171|4175	HDAC1|MCM2|MCM6	-0.855472	Subtype_2
GO Biological Processes	19	GO:0019363	pyridine nucleotide biosynthetic process	-2.02878	6.93508	3.92131	22539	130	75	3	4	2.26274	2023|10891|51085	ENO1|PPARGC1A|MLXIPL	-0.848668	Subtype_2
GO Biological Processes	19	GO:0048565	digestive tract development	-2.02878	6.93508	3.92131	22539	130	75	3	4	2.26274	688|3202|6299	KLF5|HOXA5|SALL1	-0.848668	Subtype_2
GO Biological Processes	19	GO:0019359	nicotinamide nucleotide biosynthetic process	-2.02878	6.93508	3.92131	22539	130	75	3	4	2.26274	2023|10891|51085	ENO1|PPARGC1A|MLXIPL	-0.848668	Subtype_2
GO Biological Processes	19	GO:0050773	regulation of dendrite development	-2.01974	6.88214	3.90134	22539	131	75	3	4	2.26274	2146|3066|53335	EZH2|HDAC2|BCL11A	-0.841602	Subtype_2
GO Biological Processes	19	GO:0051052	regulation of DNA metabolic process	-2.01313	3.85282	3.28378	22539	390	75	5	6.66667	2.88033	142|672|2305|10891|79733	PARP1|BRCA1|FOXM1|PPARGC1A|E2F8	-0.836262	Subtype_2
GO Biological Processes	19	GO:0090596	sensory organ morphogenesis	-2.01276	4.80832	3.49867	22539	250	75	4	5.33333	2.59458	3065|3066|6299|7020	HDAC1|HDAC2|SALL1|TFAP2A	-0.836251	Subtype_2
GO Biological Processes	19	GO:0006354	DNA-templated transcription, elongation	-2.01078	6.83	3.88158	22539	132	75	3	4	2.26274	2146|5433|6919	EZH2|POLR2D|TCEA2	-0.834604	Subtype_2
GO Biological Processes	19	GO:0072525	pyridine-containing compound biosynthetic process	-2.0019	6.77865	3.86202	22539	133	75	3	4	2.26274	2023|10891|51085	ENO1|PPARGC1A|MLXIPL	-0.826698	Subtype_2
GO Biological Processes	19	GO:0000122	negative regulation of transcription by RNA polymerase II	-23.4615	11.2763	17.0913	22539	789	76	30	39.4737	5.60685	142|165|367|1051|1831|2023|2099|2114|2146|2274|2305|3397|4094|4781|5931|6097|6591|6595|6774|6926|7704|8431|9603|9971|23414|51176|51547|57761|79733|83463	PARP1|AEBP1|AR|CEBPB|TSC22D3|ENO1|ESR1|ETS2|EZH2|FHL2|FOXM1|ID1|MAF|NFIB|RBBP7|RORC|SNAI2|SMARCA2|STAT3|TBX3|ZBTB16|NR0B2|NFE2L3|NR1H4|ZFPM2|LEF1|SIRT7|TRIB3|E2F8|MXD3	-19.1612	Subtype_3
Reactome Gene Sets	6	R-HSA-383280	Nuclear Receptor transcription pathway	-15.0236	59.3132	24.0103	22539	50	76	10	13.1579	3.8775	367|2099|2494|4306|6095|6097|8431|8856|9970|9971	AR|ESR1|NR5A2|NR3C2|RORA|RORC|NR0B2|NR1I2|NR1I3|NR1H4	-11.5014	Subtype_3
GO Biological Processes	19	GO:0071407	cellular response to organic cyclic compound	-14.6332	10.4241	13.2438	22539	569	76	20	26.3158	5.05113	142|367|468|1051|2099|2146|2274|2494|3397|4306|6095|6097|6591|6774|8431|8856|9970|9971|10891|51176	PARP1|AR|ATF4|CEBPB|ESR1|EZH2|FHL2|NR5A2|ID1|NR3C2|RORA|RORC|SNAI2|STAT3|NR0B2|NR1I2|NR1I3|NR1H4|PPARGC1A|LEF1	-11.1807	Subtype_3
GO Biological Processes	19	GO:0043401	steroid hormone mediated signaling pathway	-14.578	21.7378	16.7414	22539	191	76	14	18.4211	4.44672	142|367|2099|2274|2494|4306|6095|6097|8431|8856|9970|9971|10891|51176	PARP1|AR|ESR1|FHL2|NR5A2|NR3C2|RORA|RORC|NR0B2|NR1I2|NR1I3|NR1H4|PPARGC1A|LEF1	-11.1807	Subtype_3
GO Biological Processes	19	GO:0009755	hormone-mediated signaling pathway	-13.4035	17.8962	15.0468	22539	232	76	14	18.4211	4.44672	142|367|2099|2274|2494|4306|6095|6097|8431|8856|9970|9971|10891|51176	PARP1|AR|ESR1|FHL2|NR5A2|NR3C2|RORA|RORC|NR0B2|NR1I2|NR1I3|NR1H4|PPARGC1A|LEF1	-10.1031	Subtype_3
GO Biological Processes	19	GO:0071383	cellular response to steroid hormone stimulus	-12.769	16.0927	14.1821	22539	258	76	14	18.4211	4.44672	142|367|2099|2274|2494|4306|6095|6097|8431|8856|9970|9971|10891|51176	PARP1|AR|ESR1|FHL2|NR5A2|NR3C2|RORA|RORC|NR0B2|NR1I2|NR1I3|NR1H4|PPARGC1A|LEF1	-9.6728	Subtype_3
GO Biological Processes	19	GO:0048545	response to steroid hormone	-12.7158	12.1981	12.9587	22539	389	76	16	21.0526	4.67644	142|367|2099|2274|2494|3148|4306|5931|6095|6097|8431|8856|9970|9971|10891|51176	PARP1|AR|ESR1|FHL2|NR5A2|HMGB2|NR3C2|RBBP7|RORA|RORC|NR0B2|NR1I2|NR1I3|NR1H4|PPARGC1A|LEF1	-9.64587	Subtype_3
GO Biological Processes	19	GO:0030522	intracellular receptor signaling pathway	-12.1793	14.5681	13.4082	22539	285	76	14	18.4211	4.44672	142|367|2099|2146|2274|2494|6095|6097|6591|6774|8856|9970|9971|10891	PARP1|AR|ESR1|EZH2|FHL2|NR5A2|RORA|RORC|SNAI2|STAT3|NR1I2|NR1I3|NR1H4|PPARGC1A	-9.17994	Subtype_3
GO Biological Processes	19	GO:0006367	transcription initiation from RNA polymerase II promoter	-11.8644	19.1333	14.4443	22539	186	76	12	15.7895	4.18273	367|1871|2099|2494|4306|6095|6097|8431|8856|9970|9971|10891	AR|E2F3|ESR1|NR5A2|NR3C2|RORA|RORC|NR0B2|NR1I2|NR1I3|NR1H4|PPARGC1A	-8.92574	Subtype_3
GO Biological Processes	19	GO:0071396	cellular response to lipid	-11.3065	8.89174	11.0703	22539	567	76	17	22.3684	4.78002	142|367|1051|2099|2274|2494|3148|4306|6095|6097|6591|8431|8856|9970|9971|10891|51176	PARP1|AR|CEBPB|ESR1|FHL2|NR5A2|HMGB2|NR3C2|RORA|RORC|SNAI2|NR0B2|NR1I2|NR1I3|NR1H4|PPARGC1A|LEF1	-8.40409	Subtype_3
GO Biological Processes	19	GO:0006352	DNA-templated transcription, initiation	-10.5408	14.7668	12.4979	22539	241	76	12	15.7895	4.18273	367|1871|2099|2494|4306|6095|6097|8431|8856|9970|9971|10891	AR|E2F3|ESR1|NR5A2|NR3C2|RORA|RORC|NR0B2|NR1I2|NR1I3|NR1H4|PPARGC1A	-7.71761	Subtype_3
GO Biological Processes	19	GO:0032870	cellular response to hormone stimulus	-9.02568	6.89688	9.13716	22539	688	76	16	21.0526	4.67644	142|367|2099|2274|2494|4306|6095|6097|6774|8431|8856|9970|9971|10891|51176|57761	PARP1|AR|ESR1|FHL2|NR5A2|NR3C2|RORA|RORC|STAT3|NR0B2|NR1I2|NR1I3|NR1H4|PPARGC1A|LEF1|TRIB3	-6.2568	Subtype_3
GO Biological Processes	19	GO:0008285	negative regulation of cell proliferation	-7.78943	6.13584	8.17605	22539	725	76	15	19.7368	4.56552	367|694|1051|1871|3159|4091|4781|6591|6595|6659|6774|7027|7704|10140|10891	AR|BTG1|CEBPB|E2F3|HMGA1|SMAD6|NFIB|SNAI2|SMARCA2|SOX4|STAT3|TFDP1|ZBTB16|TOB1|PPARGC1A	-5.08014	Subtype_3
Reactome Gene Sets	6	R-HSA-2559583	Cellular Senescence	-7.7098	13.6877	10.3502	22539	195	76	9	11.8421	3.70628	1051|1871|2114|2146|3159|3397|5931|6774|7027	CEBPB|E2F3|ETS2|EZH2|HMGA1|ID1|RBBP7|STAT3|TFDP1	-5.0115	Subtype_3
Reactome Gene Sets	6	R-HSA-2262752	Cellular responses to stress	-7.69822	8.29555	8.87407	22539	429	76	12	15.7895	4.18273	367|1051|1871|2034|2114|2146|3159|3397|4306|5931|6774|7027	AR|CEBPB|E2F3|EPAS1|ETS2|EZH2|HMGA1|ID1|NR3C2|RBBP7|STAT3|TFDP1	-5.01064	Subtype_3
GO Biological Processes	19	GO:0030855	epithelial cell differentiation	-7.50385	5.83791	7.90254	22539	762	76	15	19.7368	4.56552	367|694|1051|1999|2099|2146|2494|3397|4094|4097|4781|6659|6926|51176|79733	AR|BTG1|CEBPB|ELF3|ESR1|EZH2|NR5A2|ID1|MAF|MAFG|NFIB|SOX4|TBX3|LEF1|E2F8	-4.83697	Subtype_3
GO Biological Processes	19	GO:0045444	fat cell differentiation	-7.41398	12.6497	9.88923	22539	211	76	9	11.8421	3.70628	1051|4091|6095|6097|6591|7704|10891|23414|57761	CEBPB|SMAD6|RORA|RORC|SNAI2|ZBTB16|PPARGC1A|ZFPM2|TRIB3	-4.76683	Subtype_3
GO Biological Processes	19	GO:0008202	steroid metabolic process	-7.0341	9.53588	8.81676	22539	311	76	10	13.1579	3.8775	2099|2494|6095|6097|6591|8431|8856|9971|10891|23541	ESR1|NR5A2|RORA|RORC|SNAI2|NR0B2|NR1I2|NR1H4|PPARGC1A|SEC14L2	-4.44131	Subtype_3
GO Biological Processes	19	GO:0001701	in utero embryonic development	-6.99528	9.44477	8.76521	22539	314	76	10	13.1579	3.8775	367|1051|1999|2034|4097|6926|9915|23414|51176|79733	AR|CEBPB|ELF3|EPAS1|MAFG|TBX3|ARNT2|ZFPM2|LEF1|E2F8	-4.41093	Subtype_3
Reactome Gene Sets	6	R-HSA-8953897	Cellular responses to external stimuli	-6.91634	7.03318	7.98391	22539	506	76	12	15.7895	4.18273	367|1051|1871|2034|2114|2146|3159|3397|4306|5931|6774|7027	AR|CEBPB|E2F3|EPAS1|ETS2|EZH2|HMGA1|ID1|NR3C2|RBBP7|STAT3|TFDP1	-4.37712	Subtype_3
GO Biological Processes	19	GO:0022612	gland morphogenesis	-6.81018	17.445	10.4622	22539	119	76	7	9.21053	3.31706	367|1051|1999|2099|4781|6591|6926	AR|CEBPB|ELF3|ESR1|NFIB|SNAI2|TBX3	-4.28797	Subtype_3
GO Biological Processes	19	GO:0048732	gland development	-6.77671	7.73039	8.11828	22539	422	76	11	14.4737	4.03583	367|1051|1999|2099|2146|4781|6591|6926|9935|51176|79733	AR|CEBPB|ELF3|ESR1|EZH2|NFIB|SNAI2|TBX3|MAFB|LEF1|E2F8	-4.26169	Subtype_3
GO Biological Processes	19	GO:0045598	regulation of fat cell differentiation	-6.76052	17.1567	10.3652	22539	121	76	7	9.21053	3.31706	1051|6095|6097|6591|7704|23414|57761	CEBPB|RORA|RORC|SNAI2|ZBTB16|ZFPM2|TRIB3	-4.25256	Subtype_3
GO Biological Processes	19	GO:0006325	chromatin organization	-6.57647	5.37118	7.19332	22539	773	76	14	18.4211	4.44672	2099|2146|3148|3159|4171|5931|6591|6595|9971|10891|23408|51176|51547|83439	ESR1|EZH2|HMGB2|HMGA1|MCM2|RBBP7|SNAI2|SMARCA2|NR1H4|PPARGC1A|SIRT5|LEF1|SIRT7|TCF7L1	-4.09566	Subtype_3
Canonical Pathways	11	M195	PID CMYB PATHWAY	-6.40152	21.1833	10.7797	22539	84	76	6	7.89474	3.09317	1051|2114|4094|4173|6595|51176	CEBPB|ETS2|MAF|MCM4|SMARCA2|LEF1	-3.95242	Subtype_3
GO Biological Processes	19	GO:0009792	embryo development ending in birth or egg hatching	-6.28315	6.13584	7.2887	22539	580	76	12	15.7895	4.18273	367|1051|1999|2034|2494|4097|6659|6926|9915|23414|51176|79733	AR|CEBPB|ELF3|EPAS1|NR5A2|MAFG|SOX4|TBX3|ARNT2|ZFPM2|LEF1|E2F8	-3.84611	Subtype_3
GO Biological Processes	19	GO:0048511	rhythmic process	-5.97848	8.55478	7.81609	22539	312	76	9	11.8421	3.70628	468|1051|2099|2146|3131|3397|6095|6097|10891	ATF4|CEBPB|ESR1|EZH2|HLF|ID1|RORA|RORC|PPARGC1A	-3.6024	Subtype_3
GO Biological Processes	19	GO:0019218	regulation of steroid metabolic process	-5.75646	16.4759	9.37721	22539	108	76	6	7.89474	3.09317	6095|6097|6591|9971|10891|23541	RORA|RORC|SNAI2|NR1H4|PPARGC1A|SEC14L2	-3.41989	Subtype_3
GO Biological Processes	19	GO:0030330	DNA damage response, signal transduction by p53 class mediator	-5.70983	16.1763	9.28086	22539	110	76	6	7.89474	3.09317	2305|6591|6659|7027|57472|79733	FOXM1|SNAI2|SOX4|TFDP1|CNOT6|E2F8	-3.39902	Subtype_3
GO Biological Processes	19	GO:0003006	developmental process involved in reproduction	-5.70305	5.40029	6.66854	22539	659	76	12	15.7895	4.18273	367|1051|2034|2099|3148|6595|6926|7704|9319|23414|51176|79733	AR|CEBPB|EPAS1|ESR1|HMGB2|SMARCA2|TBX3|ZBTB16|TRIP13|ZFPM2|LEF1|E2F8	-3.39833	Subtype_3
GO Biological Processes	19	GO:0006268	DNA unwinding involved in DNA replication	-5.69073	111.212	18.1349	22539	8	76	3	3.94737	2.23358	3159|4171|4173	HMGA1|MCM2|MCM4	-3.3947	Subtype_3
GO Biological Processes	19	GO:0045596	negative regulation of cell differentiation	-5.66911	5.35962	6.63269	22539	664	76	12	15.7895	4.18273	2146|3397|6095|6591|6774|6926|7704|9935|10140|23414|25793|57761	EZH2|ID1|RORA|SNAI2|STAT3|TBX3|ZBTB16|MAFB|TOB1|ZFPM2|FBXO7|TRIB3	-3.38579	Subtype_3
GO Biological Processes	19	GO:0045165	cell fate commitment	-5.64434	9.34065	7.77573	22539	254	76	8	10.5263	3.5203	367|1051|2034|2114|6095|6097|6774|6926	AR|CEBPB|EPAS1|ETS2|RORA|RORC|STAT3|TBX3	-3.37337	Subtype_3
GO Biological Processes	19	GO:2000134	negative regulation of G1/S transition of mitotic cell cycle	-5.59711	15.473	9.05069	22539	115	76	6	7.89474	3.09317	2146|6659|7027|25793|57472|79733	EZH2|SOX4|TFDP1|FBXO7|CNOT6|E2F8	-3.33418	Subtype_3
GO Biological Processes	19	GO:0010948	negative regulation of cell cycle process	-5.58843	7.6698	7.29365	22539	348	76	9	11.8421	3.70628	2146|5931|6659|7027|9232|9319|25793|57472|79733	EZH2|RBBP7|SOX4|TFDP1|PTTG1|TRIP13|FBXO7|CNOT6|E2F8	-3.32947	Subtype_3
GO Biological Processes	19	GO:0044772	mitotic cell cycle phase transition	-5.57121	5.8254	6.72595	22539	560	76	11	14.4737	4.03583	2146|2305|4171|4173|6659|7027|9319|25793|51547|57472|79733	EZH2|FOXM1|MCM2|MCM4|SOX4|TFDP1|TRIP13|FBXO7|SIRT7|CNOT6|E2F8	-3.32393	Subtype_3
GO Biological Processes	19	GO:0043009	chordate embryonic development	-5.55635	5.80467	6.70931	22539	562	76	11	14.4737	4.03583	367|1051|1999|2034|4097|6659|6926|9915|23414|51176|79733	AR|CEBPB|ELF3|EPAS1|MAFG|SOX4|TBX3|ARNT2|ZFPM2|LEF1|E2F8	-3.3129	Subtype_3
Reactome Gene Sets	6	R-HSA-1989781	PPARA activates gene expression	-5.51067	14.9529	8.87668	22539	119	76	6	7.89474	3.09317	2274|6095|9915|9971|10891|57761	FHL2|RORA|ARNT2|NR1H4|PPARGC1A|TRIB3	-3.27477	Subtype_3
GO Biological Processes	19	GO:1902807	negative regulation of cell cycle G1/S phase transition	-5.44787	14.5852	8.75161	22539	122	76	6	7.89474	3.09317	2146|6659|7027|25793|57472|79733	EZH2|SOX4|TFDP1|FBXO7|CNOT6|E2F8	-3.22788	Subtype_3
Reactome Gene Sets	6	R-HSA-400206	Regulation of lipid metabolism by Peroxisome proliferator-activated receptor alpha (PPARalpha)	-5.44787	14.5852	8.75161	22539	122	76	6	7.89474	3.09317	2274|6095|9915|9971|10891|57761	FHL2|RORA|ARNT2|NR1H4|PPARGC1A|TRIB3	-3.22788	Subtype_3
GO Biological Processes	19	GO:0000082	G1/S transition of mitotic cell cycle	-5.4125	8.69057	7.43617	22539	273	76	8	10.5263	3.5203	2146|4171|4173|6659|7027|25793|57472|79733	EZH2|MCM2|MCM4|SOX4|TFDP1|FBXO7|CNOT6|E2F8	-3.21935	Subtype_3
GO Biological Processes	19	GO:0072331	signal transduction by p53 class mediator	-5.4125	8.69057	7.43617	22539	273	76	8	10.5263	3.5203	580|2305|5931|6591|6659|7027|57472|79733	BARD1|FOXM1|RBBP7|SNAI2|SOX4|TFDP1|CNOT6|E2F8	-3.21935	Subtype_3
Reactome Gene Sets	6	R-HSA-2559585	Oncogene Induced Senescence	-5.34346	35.9474	11.6857	22539	33	76	4	5.26316	2.56139	1871|2114|3397|7027	E2F3|ETS2|ID1|TFDP1	-3.17021	Subtype_3
GO Biological Processes	19	GO:0002521	leukocyte differentiation	-5.32374	6.17845	6.6705	22539	480	76	10	13.1579	3.8775	142|1051|6095|6097|6659|6774|7704|9935|25793|51176	PARP1|CEBPB|RORA|RORC|SOX4|STAT3|ZBTB16|MAFB|FBXO7|LEF1	-3.15831	Subtype_3
GO Biological Processes	19	GO:0001568	blood vessel development	-5.32091	4.95653	6.26715	22539	718	76	12	15.7895	4.18273	694|2034|3397|4091|6095|6659|6774|6926|10553|23414|51176|79733	BTG1|EPAS1|ID1|SMAD6|RORA|SOX4|STAT3|TBX3|HTATIP2|ZFPM2|LEF1|E2F8	-3.15831	Subtype_3
GO Biological Processes	19	GO:0044770	cell cycle phase transition	-5.2784	5.42799	6.39994	22539	601	76	11	14.4737	4.03583	2146|2305|4171|4173|6659|7027|9319|25793|51547|57472|79733	EZH2|FOXM1|MCM2|MCM4|SOX4|TFDP1|TRIP13|FBXO7|SIRT7|CNOT6|E2F8	-3.13034	Subtype_3
GO Biological Processes	19	GO:0042770	signal transduction in response to DNA damage	-5.21234	13.2791	8.29232	22539	134	76	6	7.89474	3.09317	2305|6591|6659|7027|57472|79733	FOXM1|SNAI2|SOX4|TFDP1|CNOT6|E2F8	-3.08225	Subtype_3
GO Biological Processes	19	GO:0030879	mammary gland development	-5.21234	13.2791	8.29232	22539	134	76	6	7.89474	3.09317	367|1051|1999|2099|6926|51176	AR|CEBPB|ELF3|ESR1|TBX3|LEF1	-3.08225	Subtype_3
GO Biological Processes	19	GO:0044843	cell cycle G1/S phase transition	-5.19797	8.12509	7.12815	22539	292	76	8	10.5263	3.5203	2146|4171|4173|6659|7027|25793|57472|79733	EZH2|MCM2|MCM4|SOX4|TFDP1|FBXO7|CNOT6|E2F8	-3.0766	Subtype_3
GO Biological Processes	19	GO:0001944	vasculature development	-5.17017	4.78976	6.1101	22539	743	76	12	15.7895	4.18273	694|2034|3397|4091|6095|6659|6774|6926|10553|23414|51176|79733	BTG1|EPAS1|ID1|SMAD6|RORA|SOX4|STAT3|TBX3|HTATIP2|ZFPM2|LEF1|E2F8	-3.05451	Subtype_3
GO Biological Processes	19	GO:0006260	DNA replication	-5.16553	8.04246	7.08206	22539	295	76	8	10.5263	3.5203	142|580|3159|4171|4173|4781|5931|79733	PARP1|BARD1|HMGA1|MCM2|MCM4|NFIB|RBBP7|E2F8	-3.0527	Subtype_3
GO Biological Processes	19	GO:0030518	intracellular steroid hormone receptor signaling pathway	-5.13887	12.8942	8.15212	22539	138	76	6	7.89474	3.09317	142|367|2099|2274|9970|10891	PARP1|AR|ESR1|FHL2|NR1I3|PPARGC1A	-3.03441	Subtype_3
Canonical Pathways	11	M223	PID BETA CATENIN NUC PATHWAY	-5.1233	18.5354	9.13893	22539	80	76	5	6.57895	2.84377	367|6591|7089|51176|83439	AR|SNAI2|TLE2|LEF1|TCF7L1	-3.02464	Subtype_3
GO Biological Processes	19	GO:0072358	cardiovascular system development	-5.12322	4.73873	6.06131	22539	751	76	12	15.7895	4.18273	694|2034|3397|4091|6095|6659|6774|6926|10553|23414|51176|79733	BTG1|EPAS1|ID1|SMAD6|RORA|SOX4|STAT3|TBX3|HTATIP2|ZFPM2|LEF1|E2F8	-3.02464	Subtype_3
Reactome Gene Sets	6	R-HSA-4641265	Repression of WNT target genes	-5.10072	74.1414	14.7412	22539	12	76	3	3.94737	2.23358	7089|51176|83439	TLE2|LEF1|TCF7L1	-3.00988	Subtype_3
GO Biological Processes	19	GO:0045786	negative regulation of cell cycle	-5.09167	5.18637	6.19401	22539	629	76	11	14.4737	4.03583	580|2146|2305|5931|6659|7027|9232|9319|25793|57472|79733	BARD1|EZH2|FOXM1|RBBP7|SOX4|TFDP1|PTTG1|TRIP13|FBXO7|CNOT6|E2F8	-3.00616	Subtype_3
Canonical Pathways	11	M2	PID SMAD2 3NUCLEAR PATHWAY	-5.07058	18.0833	9.01432	22539	82	76	5	6.57895	2.84377	367|1051|2099|5931|7027	AR|CEBPB|ESR1|RBBP7|TFDP1	-2.99221	Subtype_3
GO Biological Processes	19	GO:0061061	muscle structure development	-5.02736	5.1052	6.12341	22539	639	76	11	14.4737	4.03583	165|694|1831|2034|2146|2274|3131|6095|6926|23414|51176	AEBP1|BTG1|TSC22D3|EPAS1|EZH2|FHL2|HLF|RORA|TBX3|ZFPM2|LEF1	-2.95745	Subtype_3
GO Biological Processes	19	GO:0032392	DNA geometric change	-5.01922	17.6527	8.89404	22539	84	76	5	6.57895	2.84377	142|3148|3159|4171|4173	PARP1|HMGB2|HMGA1|MCM2|MCM4	-2.95186	Subtype_3
GO Biological Processes	19	GO:0030902	hindbrain development	-5.01568	12.2717	7.92023	22539	145	76	6	7.89474	3.09317	2146|4781|6095|9935|10891|51176	EZH2|NFIB|RORA|MAFB|PPARGC1A|LEF1	-2.95085	Subtype_3
GO Biological Processes	19	GO:0030217	T cell differentiation	-4.99786	9.35117	7.27339	22539	222	76	7	9.21053	3.31706	6095|6097|6659|6774|7704|9935|51176	RORA|RORC|SOX4|STAT3|ZBTB16|MAFB|LEF1	-2.94054	Subtype_3
GO Biological Processes	19	GO:0045930	negative regulation of mitotic cell cycle	-4.94835	7.50799	6.77673	22539	316	76	8	10.5263	3.5203	2146|6659|7027|9232|9319|25793|57472|79733	EZH2|SOX4|TFDP1|PTTG1|TRIP13|FBXO7|CNOT6|E2F8	-2.89842	Subtype_3
KEGG Pathway	24	hsa05215	Prostate cancer	-4.94459	17.044	8.72119	22539	87	76	5	6.57895	2.84377	367|468|1871|51176|83439	AR|ATF4|E2F3|LEF1|TCF7L1	-2.89708	Subtype_3
Reactome Gene Sets	6	R-HSA-3769402	Deactivation of the beta-catenin transactivating complex	-4.91643	28.2444	10.2794	22539	42	76	4	5.26316	2.56139	6659|7089|51176|83439	SOX4|TLE2|LEF1|TCF7L1	-2.87245	Subtype_3
GO Biological Processes	19	GO:0030856	regulation of epithelial cell differentiation	-4.91512	11.7841	7.73382	22539	151	76	6	7.89474	3.09317	694|1051|2146|3397|4097|6926	BTG1|CEBPB|EZH2|ID1|MAFG|TBX3	-2.87245	Subtype_3
GO Biological Processes	19	GO:0046632	alpha-beta T cell differentiation	-4.84926	16.2948	8.50368	22539	91	76	5	6.57895	2.84377	6095|6097|6774|7704|51176	RORA|RORC|STAT3|ZBTB16|LEF1	-2.81771	Subtype_3
GO Biological Processes	19	GO:0048608	reproductive structure development	-4.84855	6.20719	6.34138	22539	430	76	9	11.8421	3.70628	367|1051|2034|2099|3148|6926|23414|51176|79733	AR|CEBPB|EPAS1|ESR1|HMGB2|TBX3|ZFPM2|LEF1|E2F8	-2.81771	Subtype_3
GO Biological Processes	19	GO:0030098	lymphocyte differentiation	-4.841	7.25543	6.62778	22539	327	76	8	10.5263	3.5203	6095|6097|6659|6774|7704|9935|25793|51176	RORA|RORC|SOX4|STAT3|ZBTB16|MAFB|FBXO7|LEF1	-2.8171	Subtype_3
GO Biological Processes	19	GO:1901991	negative regulation of mitotic cell cycle phase transition	-4.83767	8.83387	7.02182	22539	235	76	7	9.21053	3.31706	2146|6659|7027|9319|25793|57472|79733	EZH2|SOX4|TFDP1|TRIP13|FBXO7|CNOT6|E2F8	-2.81607	Subtype_3
Canonical Pathways	11	M285	PID HNF3A PATHWAY	-4.83485	26.9605	10.026	22539	44	76	4	5.26316	2.56139	367|1051|2099|4781	AR|CEBPB|ESR1|NFIB	-2.81553	Subtype_3
GO Biological Processes	19	GO:0061458	reproductive system development	-4.82463	6.16419	6.31134	22539	433	76	9	11.8421	3.70628	367|1051|2034|2099|3148|6926|23414|51176|79733	AR|CEBPB|EPAS1|ESR1|HMGB2|TBX3|ZFPM2|LEF1|E2F8	-2.80757	Subtype_3
GO Biological Processes	19	GO:0098727	maintenance of cell number	-4.81883	11.3337	7.55767	22539	157	76	6	7.89474	3.09317	2034|2146|6659|6774|6926|9079	EPAS1|EZH2|SOX4|STAT3|TBX3|LDB2	-2.80403	Subtype_3
GO Biological Processes	19	GO:0060443	mammary gland morphogenesis	-4.79553	26.3614	9.90551	22539	45	76	4	5.26316	2.56139	367|1999|2099|6926	AR|ELF3|ESR1|TBX3	-2.79114	Subtype_3
GO Biological Processes	19	GO:2001170	negative regulation of ATP biosynthetic process	-4.7883	59.3132	13.1407	22539	15	76	3	3.94737	2.23358	142|6774|10891	PARP1|STAT3|PPARGC1A	-2.79114	Subtype_3
GO Biological Processes	19	GO:0061448	connective tissue development	-4.75544	8.57835	6.89429	22539	242	76	7	9.21053	3.31706	4094|4781|6097|6591|7704|9971|10891	MAF|NFIB|RORC|SNAI2|ZBTB16|NR1H4|PPARGC1A	-2.76258	Subtype_3
GO Biological Processes	19	GO:0060850	regulation of transcription involved in cell fate commitment	-4.69917	55.6061	12.7092	22539	16	76	3	3.94737	2.23358	1051|6095|6097	CEBPB|RORA|RORC	-2.7231	Subtype_3
Canonical Pathways	11	M288	PID HES HEY PATHWAY	-4.68293	24.7138	9.56639	22539	48	76	4	5.26316	2.56139	142|367|3397|6774	PARP1|AR|ID1|STAT3	-2.70891	Subtype_3
GO Biological Processes	19	GO:1901988	negative regulation of cell cycle phase transition	-4.60953	8.14102	6.67059	22539	255	76	7	9.21053	3.31706	2146|6659|7027|9319|25793|57472|79733	EZH2|SOX4|TFDP1|TRIP13|FBXO7|CNOT6|E2F8	-2.6516	Subtype_3
GO Biological Processes	19	GO:2000045	regulation of G1/S transition of mitotic cell cycle	-4.56641	10.2264	7.10646	22539	174	76	6	7.89474	3.09317	2146|6659|7027|25793|57472|79733	EZH2|SOX4|TFDP1|FBXO7|CNOT6|E2F8	-2.61436	Subtype_3
GO Biological Processes	19	GO:0042093	T-helper cell differentiation	-4.54393	22.8128	9.15961	22539	52	76	4	5.26316	2.56139	6095|6097|6774|51176	RORA|RORC|STAT3|LEF1	-2.59768	Subtype_3
GO Biological Processes	19	GO:0051169	nuclear transport	-4.52294	5.6429	5.93593	22539	473	76	9	11.8421	3.70628	142|580|3159|6591|6628|6659|6774|10140|10553	PARP1|BARD1|HMGA1|SNAI2|SNRPB|SOX4|STAT3|TOB1|HTATIP2	-2.58052	Subtype_3
GO Biological Processes	19	GO:0019216	regulation of lipid metabolic process	-4.50794	6.51793	6.17342	22539	364	76	8	10.5263	3.5203	2274|6095|6097|6591|9971|10891|23541|57761	FHL2|RORA|RORC|SNAI2|NR1H4|PPARGC1A|SEC14L2|TRIB3	-2.56931	Subtype_3
GO Biological Processes	19	GO:0002294	CD4-positive, alpha-beta T cell differentiation involved in immune response	-4.47864	21.9678	8.97294	22539	54	76	4	5.26316	2.56139	6095|6097|6774|51176	RORA|RORC|STAT3|LEF1	-2.5492	Subtype_3
GO Biological Processes	19	GO:0001503	ossification	-4.4576	6.41223	6.10569	22539	370	76	8	10.5263	3.5203	1051|2274|3397|4091|6591|7704|10140|51176	CEBPB|FHL2|ID1|SMAD6|SNAI2|ZBTB16|TOB1|LEF1	-2.53199	Subtype_3
GO Biological Processes	19	GO:0032922	circadian regulation of gene expression	-4.44695	21.5684	8.88334	22539	55	76	4	5.26316	2.56139	468|6095|6097|10891	ATF4|RORA|RORC|PPARGC1A	-2.53041	Subtype_3
KEGG Pathway	24	hsa05221	Acute myeloid leukemia	-4.44695	21.5684	8.88334	22539	55	76	4	5.26316	2.56139	6774|7704|51176|83439	STAT3|ZBTB16|LEF1|TCF7L1	-2.53041	Subtype_3
GO Biological Processes	19	GO:0002293	alpha-beta T cell differentiation involved in immune response	-4.44695	21.5684	8.88334	22539	55	76	4	5.26316	2.56139	6095|6097|6774|51176	RORA|RORC|STAT3|LEF1	-2.53041	Subtype_3
GO Biological Processes	19	GO:0002287	alpha-beta T cell activation involved in immune response	-4.44695	21.5684	8.88334	22539	55	76	4	5.26316	2.56139	6095|6097|6774|51176	RORA|RORC|STAT3|LEF1	-2.53041	Subtype_3
GO Biological Processes	19	GO:0030278	regulation of ossification	-4.43026	9.67062	6.86914	22539	184	76	6	7.89474	3.09317	1051|3397|4091|6591|7704|10140	CEBPB|ID1|SMAD6|SNAI2|ZBTB16|TOB1	-2.51551	Subtype_3
GO Biological Processes	19	GO:0072539	T-helper 17 cell differentiation	-4.39467	44.4849	11.3164	22539	20	76	3	3.94737	2.23358	6095|6097|6774	RORA|RORC|STAT3	-2.49384	Subtype_3
GO Biological Processes	19	GO:0071156	regulation of cell cycle arrest	-4.39452	13.1224	7.51418	22539	113	76	5	6.57895	2.84377	2305|6659|7027|57472|79733	FOXM1|SOX4|TFDP1|CNOT6|E2F8	-2.49384	Subtype_3
GO Biological Processes	19	GO:0046631	alpha-beta T cell activation	-4.34001	12.783	7.40063	22539	116	76	5	6.57895	2.84377	6095|6097|6774|7704|51176	RORA|RORC|STAT3|ZBTB16|LEF1	-2.4629	Subtype_3
GO Biological Processes	19	GO:1903579	negative regulation of ATP metabolic process	-4.32878	42.3665	11.0312	22539	21	76	3	3.94737	2.23358	142|6774|10891	PARP1|STAT3|PPARGC1A	-2.45455	Subtype_3
GO Biological Processes	19	GO:1902806	regulation of cell cycle G1/S phase transition	-4.32708	9.26768	6.69199	22539	192	76	6	7.89474	3.09317	2146|6659|7027|25793|57472|79733	EZH2|SOX4|TFDP1|FBXO7|CNOT6|E2F8	-2.45455	Subtype_3
GO Biological Processes	19	GO:1901699	cellular response to nitrogen compound	-4.3139	4.71488	5.49641	22539	629	76	10	13.1579	3.8775	142|468|1051|2099|2146|3397|6774|9971|10891|57761	PARP1|ATF4|CEBPB|ESR1|EZH2|ID1|STAT3|NR1H4|PPARGC1A|TRIB3	-2.44329	Subtype_3
GO Biological Processes	19	GO:0007623	circadian rhythm	-4.30203	9.17214	6.64932	22539	194	76	6	7.89474	3.09317	468|2146|3397|6095|6097|10891	ATF4|EZH2|ID1|RORA|RORC|PPARGC1A	-2.43667	Subtype_3
GO Biological Processes	19	GO:0051090	regulation of DNA binding transcription factor activity	-4.29634	6.0834	5.89034	22539	390	76	8	10.5263	3.5203	367|2099|2146|3397|8431|9971|10891|11074	AR|ESR1|EZH2|ID1|NR0B2|NR1H4|PPARGC1A|TRIM31	-2.43537	Subtype_3
GO Biological Processes	19	GO:0030099	myeloid cell differentiation	-4.27298	6.03696	5.85933	22539	393	76	8	10.5263	3.5203	142|1051|2034|3148|6774|7704|9935|51176	PARP1|CEBPB|EPAS1|HMGB2|STAT3|ZBTB16|MAFB|LEF1	-2.41667	Subtype_3
GO Biological Processes	19	GO:0002292	T cell differentiation involved in immune response	-4.26887	19.4469	8.39153	22539	61	76	4	5.26316	2.56139	6095|6097|6774|51176	RORA|RORC|STAT3|LEF1	-2.41412	Subtype_3
GO Biological Processes	19	GO:0072538	T-helper 17 type immune response	-4.26617	40.4408	10.7655	22539	22	76	3	3.94737	2.23358	6095|6097|6774	RORA|RORC|STAT3	-2.41297	Subtype_3
KEGG Pathway	24	hsa05200	Pathways in cancer	-4.25752	6.0064	5.83884	22539	395	76	8	10.5263	3.5203	367|1871|2034|6774|7704|9915|51176|83439	AR|E2F3|EPAS1|STAT3|ZBTB16|ARNT2|LEF1|TCF7L1	-2.40895	Subtype_3
Reactome Gene Sets	6	R-HSA-8878166	Transcriptional regulation by RUNX2	-4.25247	12.2548	7.22041	22539	121	76	5	6.57895	2.84377	367|2099|4091|4094|10891	AR|ESR1|SMAD6|MAF|PPARGC1A	-2.40543	Subtype_3
GO Biological Processes	19	GO:0048514	blood vessel morphogenesis	-4.25092	4.63384	5.42468	22539	640	76	10	13.1579	3.8775	694|2034|3397|6095|6659|6774|10553|23414|51176|79733	BTG1|EPAS1|ID1|RORA|SOX4|STAT3|HTATIP2|ZFPM2|LEF1|E2F8	-2.40541	Subtype_3
GO Biological Processes	19	GO:0006977	DNA damage response, signal transduction by p53 class mediator resulting in cell cycle arrest	-4.24102	19.1333	8.31637	22539	62	76	4	5.26316	2.56139	6659|7027|57472|79733	SOX4|TFDP1|CNOT6|E2F8	-2.39854	Subtype_3
GO Biological Processes	19	GO:0072431	signal transduction involved in mitotic G1 DNA damage checkpoint	-4.21363	18.8296	8.24294	22539	63	76	4	5.26316	2.56139	6659|7027|57472|79733	SOX4|TFDP1|CNOT6|E2F8	-2.37568	Subtype_3
GO Biological Processes	19	GO:1902400	intracellular signal transduction involved in G1 DNA damage checkpoint	-4.21363	18.8296	8.24294	22539	63	76	4	5.26316	2.56139	6659|7027|57472|79733	SOX4|TFDP1|CNOT6|E2F8	-2.37568	Subtype_3
GO Biological Processes	19	GO:0060444	branching involved in mammary gland duct morphogenesis	-4.20652	38.6825	10.5169	22539	23	76	3	3.94737	2.23358	367|2099|6926	AR|ESR1|TBX3	-2.37454	Subtype_3
GO Biological Processes	19	GO:1903203	regulation of oxidative stress-induced neuron death	-4.20652	38.6825	10.5169	22539	23	76	3	3.94737	2.23358	142|468|25793	PARP1|ATF4|FBXO7	-2.37454	Subtype_3
GO Biological Processes	19	GO:0032355	response to estradiol	-4.20181	11.9583	7.1173	22539	124	76	5	6.57895	2.84377	2099|2146|6774|9915|10891	ESR1|EZH2|STAT3|ARNT2|PPARGC1A	-2.37454	Subtype_3
GO Biological Processes	19	GO:0003206	cardiac chamber morphogenesis	-4.20181	11.9583	7.1173	22539	124	76	5	6.57895	2.84377	2274|4091|6659|6926|23414	FHL2|SMAD6|SOX4|TBX3|ZFPM2	-2.37454	Subtype_3
KEGG Pathway	24	hsa04110	Cell cycle	-4.20181	11.9583	7.1173	22539	124	76	5	6.57895	2.84377	1871|4171|4173|7027|9232	E2F3|MCM2|MCM4|TFDP1|PTTG1	-2.37454	Subtype_3
GO Biological Processes	19	GO:0043367	CD4-positive, alpha-beta T cell differentiation	-4.18671	18.5354	8.17119	22539	64	76	4	5.26316	2.56139	6095|6097|6774|51176	RORA|RORC|STAT3|LEF1	-2.36348	Subtype_3
GO Biological Processes	19	GO:0050673	epithelial cell proliferation	-4.17409	5.84366	5.72858	22539	406	76	8	10.5263	3.5203	367|1051|2099|3148|3397|4781|6591|6774	AR|CEBPB|ESR1|HMGB2|ID1|NFIB|SNAI2|STAT3	-2.3523	Subtype_3
GO Biological Processes	19	GO:0072413	signal transduction involved in mitotic cell cycle checkpoint	-4.16023	18.2502	8.10105	22539	65	76	4	5.26316	2.56139	6659|7027|57472|79733	SOX4|TFDP1|CNOT6|E2F8	-2.34984	Subtype_3
GO Biological Processes	19	GO:1902402	signal transduction involved in mitotic DNA damage checkpoint	-4.16023	18.2502	8.10105	22539	65	76	4	5.26316	2.56139	6659|7027|57472|79733	SOX4|TFDP1|CNOT6|E2F8	-2.34984	Subtype_3
GO Biological Processes	19	GO:1902403	signal transduction involved in mitotic DNA integrity checkpoint	-4.16023	18.2502	8.10105	22539	65	76	4	5.26316	2.56139	6659|7027|57472|79733	SOX4|TFDP1|CNOT6|E2F8	-2.34984	Subtype_3
KEGG Pathway	24	hsa05321	Inflammatory bowel disease (IBD)	-4.16023	18.2502	8.10105	22539	65	76	4	5.26316	2.56139	4094|6095|6097|6774	MAF|RORA|RORC|STAT3	-2.34984	Subtype_3
GO Biological Processes	19	GO:0001649	osteoblast differentiation	-4.15748	8.63784	6.40562	22539	206	76	6	7.89474	3.09317	1051|2274|3397|6591|10140|51176	CEBPB|FHL2|ID1|SNAI2|TOB1|LEF1	-2.34849	Subtype_3
GO Biological Processes	19	GO:0036475	neuron death in response to oxidative stress	-4.14958	37.0707	10.2838	22539	24	76	3	3.94737	2.23358	142|468|25793	PARP1|ATF4|FBXO7	-2.34199	Subtype_3
GO Biological Processes	19	GO:0071417	cellular response to organonitrogen compound	-4.14126	5.03602	5.46918	22539	530	76	9	11.8421	3.70628	142|468|1051|2146|3397|6774|9971|10891|57761	PARP1|ATF4|CEBPB|EZH2|ID1|STAT3|NR1H4|PPARGC1A|TRIB3	-2.33784	Subtype_3
Canonical Pathways	11	M101	PID HDAC CLASSI PATHWAY	-4.13419	17.9737	8.03245	22539	66	76	4	5.26316	2.56139	5931|6774|23408|51547	RBBP7|STAT3|SIRT5|SIRT7	-2.33578	Subtype_3
GO Biological Processes	19	GO:0030521	androgen receptor signaling pathway	-4.10856	17.7054	7.96534	22539	67	76	4	5.26316	2.56139	367|2274|9970|10891	AR|FHL2|NR1I3|PPARGC1A	-2.31741	Subtype_3
GO Biological Processes	19	GO:0061180	mammary gland epithelium development	-4.10856	17.7054	7.96534	22539	67	76	4	5.26316	2.56139	367|1051|2099|6926	AR|CEBPB|ESR1|TBX3	-2.31741	Subtype_3
GO Biological Processes	19	GO:0003281	ventricular septum development	-4.10856	17.7054	7.96534	22539	67	76	4	5.26316	2.56139	4091|6659|6926|23414	SMAD6|SOX4|TBX3|ZFPM2	-2.31741	Subtype_3
Canonical Pathways	11	M32	PID HDAC CLASSIII PATHWAY	-4.09512	35.5879	10.0646	22539	25	76	3	3.94737	2.23358	2274|10891|51547	FHL2|PPARGC1A|SIRT7	-2.30798	Subtype_3
GO Biological Processes	19	GO:0060411	cardiac septum morphogenesis	-4.05851	17.1922	7.83538	22539	69	76	4	5.26316	2.56139	4091|6659|6926|23414	SMAD6|SOX4|TBX3|ZFPM2	-2.28031	Subtype_3
GO Biological Processes	19	GO:2001171	positive regulation of ATP biosynthetic process	-4.04293	34.2191	9.858	22539	26	76	3	3.94737	2.23358	2023|6774|10891	ENO1|STAT3|PPARGC1A	-2.26891	Subtype_3
GO Biological Processes	19	GO:0031571	mitotic G1 DNA damage checkpoint	-4.00998	16.7079	7.71075	22539	71	76	4	5.26316	2.56139	6659|7027|57472|79733	SOX4|TFDP1|CNOT6|E2F8	-2.24237	Subtype_3
GO Biological Processes	19	GO:0044819	mitotic G1/S transition checkpoint	-4.00998	16.7079	7.71075	22539	71	76	4	5.26316	2.56139	6659|7027|57472|79733	SOX4|TFDP1|CNOT6|E2F8	-2.24237	Subtype_3
GO Biological Processes	19	GO:0044783	G1 DNA damage checkpoint	-3.98627	16.4759	7.65032	22539	72	76	4	5.26316	2.56139	6659|7027|57472|79733	SOX4|TFDP1|CNOT6|E2F8	-2.22278	Subtype_3
GO Biological Processes	19	GO:0035710	CD4-positive, alpha-beta T cell activation	-3.9629	16.2502	7.59109	22539	73	76	4	5.26316	2.56139	6095|6097|6774|51176	RORA|RORC|STAT3|LEF1	-2.20723	Subtype_3
GO Biological Processes	19	GO:0035019	somatic stem cell population maintenance	-3.9629	16.2502	7.59109	22539	73	76	4	5.26316	2.56139	2034|6659|6774|9079	EPAS1|SOX4|STAT3|LDB2	-2.20723	Subtype_3
GO Biological Processes	19	GO:0032508	DNA duplex unwinding	-3.93987	16.0306	7.53302	22539	74	76	4	5.26316	2.56139	142|3159|4171|4173	PARP1|HMGA1|MCM2|MCM4	-2.18944	Subtype_3
GO Biological Processes	19	GO:2001169	regulation of ATP biosynthetic process	-3.91717	15.8168	7.47607	22539	75	76	4	5.26316	2.56139	142|2023|6774|10891	PARP1|ENO1|STAT3|PPARGC1A	-2.17512	Subtype_3
GO Biological Processes	19	GO:0003002	regionalization	-3.91283	6.30991	5.64341	22539	329	76	7	9.21053	3.31706	367|2114|4091|6926|7704|9935|51176	AR|ETS2|SMAD6|TBX3|ZBTB16|MAFB|LEF1	-2.17512	Subtype_3
GO Biological Processes	19	GO:0035116	embryonic hindlimb morphogenesis	-3.89829	30.6792	9.30239	22539	29	76	3	3.94737	2.23358	3899|6926|7704	AFF3|TBX3|ZBTB16	-2.16496	Subtype_3
GO Biological Processes	19	GO:0043433	negative regulation of DNA binding transcription factor activity	-3.89484	10.2974	6.51027	22539	144	76	5	6.57895	2.84377	2099|2146|3397|8431|9971	ESR1|EZH2|ID1|NR0B2|NR1H4	-2.16269	Subtype_3
KEGG Pathway	24	hsa03018	RNA degradation	-3.87274	15.406	7.36539	22539	77	76	4	5.26316	2.56139	694|2023|10140|57472	BTG1|ENO1|TOB1|CNOT6	-2.14525	Subtype_3
GO Biological Processes	19	GO:2000758	positive regulation of peptidyl-lysine acetylation	-3.85359	29.6566	9.13561	22539	30	76	3	3.94737	2.23358	6591|6659|10891	SNAI2|SOX4|PPARGC1A	-2.13269	Subtype_3
GO Biological Processes	19	GO:0072401	signal transduction involved in DNA integrity checkpoint	-3.85098	15.2085	7.31159	22539	78	76	4	5.26316	2.56139	6659|7027|57472|79733	SOX4|TFDP1|CNOT6|E2F8	-2.13269	Subtype_3
GO Biological Processes	19	GO:0072422	signal transduction involved in DNA damage checkpoint	-3.85098	15.2085	7.31159	22539	78	76	4	5.26316	2.56139	6659|7027|57472|79733	SOX4|TFDP1|CNOT6|E2F8	-2.13269	Subtype_3
GO Biological Processes	19	GO:0035107	appendage morphogenesis	-3.83906	10.0191	6.40308	22539	148	76	5	6.57895	2.84377	3899|6659|6926|7704|51176	AFF3|SOX4|TBX3|ZBTB16|LEF1	-2.12303	Subtype_3
GO Biological Processes	19	GO:0035108	limb morphogenesis	-3.83906	10.0191	6.40308	22539	148	76	5	6.57895	2.84377	3899|6659|6926|7704|51176	AFF3|SOX4|TBX3|ZBTB16|LEF1	-2.12303	Subtype_3
GO Biological Processes	19	GO:0072395	signal transduction involved in cell cycle checkpoint	-3.82952	15.016	7.25877	22539	79	76	4	5.26316	2.56139	6659|7027|57472|79733	SOX4|TFDP1|CNOT6|E2F8	-2.11462	Subtype_3
GO Biological Processes	19	GO:0006261	DNA-dependent DNA replication	-3.82537	9.95187	6.37691	22539	149	76	5	6.57895	2.84377	142|3159|4171|4173|79733	PARP1|HMGA1|MCM2|MCM4|E2F8	-2.1116	Subtype_3
GO Biological Processes	19	GO:0048872	homeostasis of number of cells	-3.81379	7.47645	5.84243	22539	238	76	6	7.89474	3.09317	1831|2034|2146|3148|6774|9935	TSC22D3|EPAS1|EZH2|HMGB2|STAT3|MAFB	-2.10337	Subtype_3
GO Biological Processes	19	GO:0042110	T cell activation	-3.81265	5.18019	5.25714	22539	458	76	8	10.5263	3.5203	1051|6095|6097|6659|6774|7704|9935|51176	CEBPB|RORA|RORC|SOX4|STAT3|ZBTB16|MAFB|LEF1	-2.10337	Subtype_3
GO Biological Processes	19	GO:0060603	mammary gland duct morphogenesis	-3.81044	28.6999	8.9768	22539	31	76	3	3.94737	2.23358	367|2099|6926	AR|ESR1|TBX3	-2.10337	Subtype_3
Reactome Gene Sets	6	R-HSA-1912408	Pre-NOTCH Transcription and Translation	-3.81044	28.6999	8.9768	22539	31	76	3	3.94737	2.23358	1871|1999|7027	E2F3|ELF3|TFDP1	-2.10337	Subtype_3
GO Biological Processes	19	GO:0097190	apoptotic signaling pathway	-3.80025	4.53927	5.05832	22539	588	76	9	11.8421	3.70628	142|367|468|1051|2023|3148|6591|7027|57761	PARP1|AR|ATF4|CEBPB|ENO1|HMGB2|SNAI2|TFDP1|TRIB3	-2.09759	Subtype_3
GO Biological Processes	19	GO:0003007	heart morphogenesis	-3.79406	7.41414	5.81075	22539	240	76	6	7.89474	3.09317	2274|4091|6591|6659|6926|23414	FHL2|SMAD6|SNAI2|SOX4|TBX3|ZFPM2	-2.09358	Subtype_3
GO Biological Processes	19	GO:1903580	positive regulation of ATP metabolic process	-3.76874	27.803	8.82533	22539	32	76	3	3.94737	2.23358	2023|6774|10891	ENO1|STAT3|PPARGC1A	-2.07369	Subtype_3
Reactome Gene Sets	6	R-HSA-8941326	RUNX2 regulates bone development	-3.76874	27.803	8.82533	22539	32	76	3	3.94737	2.23358	367|4091|4094	AR|SMAD6|MAF	-2.07369	Subtype_3
GO Biological Processes	19	GO:0050810	regulation of steroid biosynthetic process	-3.76685	14.4666	7.10592	22539	82	76	4	5.26316	2.56139	6591|9971|10891|23541	SNAI2|NR1H4|PPARGC1A|SEC14L2	-2.07287	Subtype_3
GO Biological Processes	19	GO:0045637	regulation of myeloid cell differentiation	-3.7648	7.32261	5.7639	22539	243	76	6	7.89474	3.09317	1051|3148|6774|7704|9935|51176	CEBPB|HMGB2|STAT3|ZBTB16|MAFB|LEF1	-2.07208	Subtype_3
GO Biological Processes	19	GO:0019827	stem cell population maintenance	-3.7453	9.56664	6.22498	22539	155	76	5	6.57895	2.84377	2034|6659|6774|6926|9079	EPAS1|SOX4|STAT3|TBX3|LDB2	-2.06299	Subtype_3
GO Biological Processes	19	GO:0006913	nucleocytoplasmic transport	-3.7424	5.05869	5.16657	22539	469	76	8	10.5263	3.5203	142|580|6591|6628|6659|6774|10140|10553	PARP1|BARD1|SNAI2|SNRPB|SOX4|STAT3|TOB1|HTATIP2	-2.06114	Subtype_3
GO Biological Processes	19	GO:0010564	regulation of cell cycle process	-3.70961	3.98075	4.81244	22539	745	76	10	13.1579	3.8775	2146|2305|5931|6659|7027|9232|9319|25793|57472|79733	EZH2|FOXM1|RBBP7|SOX4|TFDP1|PTTG1|TRIP13|FBXO7|CNOT6|E2F8	-2.03419	Subtype_3
GO Biological Processes	19	GO:0003205	cardiac chamber development	-3.70653	9.38499	6.15208	22539	158	76	5	6.57895	2.84377	2274|4091|6659|6926|23414	FHL2|SMAD6|SOX4|TBX3|ZFPM2	-2.03252	Subtype_3
GO Biological Processes	19	GO:0046661	male sex differentiation	-3.69379	9.32597	6.12821	22539	159	76	5	6.57895	2.84377	367|2099|3148|6926|23414	AR|ESR1|HMGB2|TBX3|ZFPM2	-2.02131	Subtype_3
GO Biological Processes	19	GO:1902893	regulation of pri-miRNA transcription by RNA polymerase II	-3.68933	26.1676	8.54224	22539	34	76	3	3.94737	2.23358	4091|4781|6774	SMAD6|NFIB|STAT3	-2.01839	Subtype_3
GO Biological Processes	19	GO:0032844	regulation of homeostatic process	-3.68023	4.95308	5.08665	22539	479	76	8	10.5263	3.5203	142|1831|3148|6095|6774|9935|9971|10891	PARP1|TSC22D3|HMGB2|RORA|STAT3|MAFB|NR1H4|PPARGC1A	-2.01456	Subtype_3
GO Biological Processes	19	GO:0007050	cell cycle arrest	-3.67943	7.06109	5.62802	22539	252	76	6	7.89474	3.09317	580|2305|6659|7027|57472|79733	BARD1|FOXM1|SOX4|TFDP1|CNOT6|E2F8	-2.01456	Subtype_3
Reactome Gene Sets	6	R-HSA-8953750	Transcriptional Regulation by E2F6	-3.65147	25.4199	8.40967	22539	35	76	3	3.94737	2.23358	2146|5931|7027	EZH2|RBBP7|TFDP1	-1.99751	Subtype_3
GO Biological Processes	19	GO:0071158	positive regulation of cell cycle arrest	-3.64857	13.4803	6.82304	22539	88	76	4	5.26316	2.56139	6659|7027|57472|79733	SOX4|TFDP1|CNOT6|E2F8	-1.99573	Subtype_3
GO Biological Processes	19	GO:0007093	mitotic cell cycle checkpoint	-3.61915	8.98684	5.9893	22539	165	76	5	6.57895	2.84377	6659|7027|9319|57472|79733	SOX4|TFDP1|TRIP13|CNOT6|E2F8	-1.97776	Subtype_3
GO Biological Processes	19	GO:0071466	cellular response to xenobiotic stimulus	-3.61915	8.98684	5.9893	22539	165	76	5	6.57895	2.84377	6095|6097|8856|9915|10891	RORA|RORC|NR1I2|ARNT2|PPARGC1A	-1.97776	Subtype_3
GO Biological Processes	19	GO:1903578	regulation of ATP metabolic process	-3.61107	13.1807	6.73481	22539	90	76	4	5.26316	2.56139	142|2023|6774|10891	PARP1|ENO1|STAT3|PPARGC1A	-1.97252	Subtype_3
GO Biological Processes	19	GO:0001892	embryonic placenta development	-3.61107	13.1807	6.73481	22539	90	76	4	5.26316	2.56139	1051|2034|51176|79733	CEBPB|EPAS1|LEF1|E2F8	-1.97252	Subtype_3
GO Biological Processes	19	GO:0001501	skeletal system development	-3.60764	4.83203	4.99362	22539	491	76	8	10.5263	3.5203	165|2114|4094|4781|6591|6659|6926|7704	AEBP1|ETS2|MAF|NFIB|SNAI2|SOX4|TBX3|ZBTB16	-1.97005	Subtype_3
GO Biological Processes	19	GO:0046890	regulation of lipid biosynthetic process	-3.59494	8.87922	5.94456	22539	167	76	5	6.57895	2.84377	6591|9971|10891|23541|57761	SNAI2|NR1H4|PPARGC1A|SEC14L2|TRIB3	-1.9611	Subtype_3
GO Biological Processes	19	GO:0071867	response to monoamine	-3.57906	24.0459	8.16045	22539	37	76	3	3.94737	2.23358	468|3397|10891	ATF4|ID1|PPARGC1A	-1.95172	Subtype_3
GO Biological Processes	19	GO:0071869	response to catecholamine	-3.57906	24.0459	8.16045	22539	37	76	3	3.94737	2.23358	468|3397|10891	ATF4|ID1|PPARGC1A	-1.95172	Subtype_3
GO Biological Processes	19	GO:0035137	hindlimb morphogenesis	-3.57906	24.0459	8.16045	22539	37	76	3	3.94737	2.23358	3899|6926|7704	AFF3|TBX3|ZBTB16	-1.95172	Subtype_3
GO Biological Processes	19	GO:0034504	protein localization to nucleus	-3.57202	5.5507	5.16191	22539	374	76	7	9.21053	3.31706	142|580|6591|6659|6774|7704|10140	PARP1|BARD1|SNAI2|SOX4|STAT3|ZBTB16|TOB1	-1.94652	Subtype_3
GO Biological Processes	19	GO:0007548	sex differentiation	-3.54457	6.6644	5.41577	22539	267	76	6	7.89474	3.09317	367|1051|2099|3148|6926|23414	AR|CEBPB|ESR1|HMGB2|TBX3|ZFPM2	-1.92437	Subtype_3
Canonical Pathways	11	M229	PID P38 ALPHA BETA DOWNSTREAM PATHWAY	-3.5444	23.4131	8.0431	22539	38	76	3	3.94737	2.23358	1051|2099|10891	CEBPB|ESR1|PPARGC1A	-1.92437	Subtype_3
GO Biological Processes	19	GO:1901985	positive regulation of protein acetylation	-3.5444	23.4131	8.0431	22539	38	76	3	3.94737	2.23358	6591|6659|10891	SNAI2|SOX4|PPARGC1A	-1.92437	Subtype_3
GO Biological Processes	19	GO:0061614	pri-miRNA transcription by RNA polymerase II	-3.51069	22.8128	7.93016	22539	39	76	3	3.94737	2.23358	4091|4781|6774	SMAD6|NFIB|STAT3	-1.90052	Subtype_3
GO Biological Processes	19	GO:0033146	regulation of intracellular estrogen receptor signaling pathway	-3.51069	22.8128	7.93016	22539	39	76	3	3.94737	2.23358	142|367|2099	PARP1|AR|ESR1	-1.90052	Subtype_3
GO Biological Processes	19	GO:0060612	adipose tissue development	-3.51069	22.8128	7.93016	22539	39	76	3	3.94737	2.23358	6097|9971|10891	RORC|NR1H4|PPARGC1A	-1.90052	Subtype_3
GO Biological Processes	19	GO:0002286	T cell activation involved in immune response	-3.50372	12.3569	6.48613	22539	96	76	4	5.26316	2.56139	6095|6097|6774|51176	RORA|RORC|STAT3|LEF1	-1.89632	Subtype_3
GO Biological Processes	19	GO:0048736	appendage development	-3.50119	8.47331	5.77282	22539	175	76	5	6.57895	2.84377	3899|6659|6926|7704|51176	AFF3|SOX4|TBX3|ZBTB16|LEF1	-1.89632	Subtype_3
GO Biological Processes	19	GO:0060173	limb development	-3.50119	8.47331	5.77282	22539	175	76	5	6.57895	2.84377	3899|6659|6926|7704|51176	AFF3|SOX4|TBX3|ZBTB16|LEF1	-1.89632	Subtype_3
GO Biological Processes	19	GO:0060412	ventricular septum morphogenesis	-3.47788	22.2424	7.82138	22539	40	76	3	3.94737	2.23358	6659|6926|23414	SOX4|TBX3|ZFPM2	-1.87995	Subtype_3
GO Biological Processes	19	GO:0070317	negative regulation of G0 to G1 transition	-3.47788	22.2424	7.82138	22539	40	76	3	3.94737	2.23358	2146|5931|7027	EZH2|RBBP7|TFDP1	-1.87995	Subtype_3
GO Biological Processes	19	GO:0071824	protein-DNA complex subunit organization	-3.47613	6.47053	5.30914	22539	275	76	6	7.89474	3.09317	142|2099|3148|3159|4171|5931	PARP1|ESR1|HMGB2|HMGA1|MCM2|RBBP7	-1.87907	Subtype_3
GO Biological Processes	19	GO:0002062	chondrocyte differentiation	-3.46954	12.1047	6.40812	22539	98	76	4	5.26316	2.56139	4094|4781|6591|7704	MAF|NFIB|SNAI2|ZBTB16	-1.87505	Subtype_3
GO Biological Processes	19	GO:0042752	regulation of circadian rhythm	-3.46954	12.1047	6.40812	22539	98	76	4	5.26316	2.56139	2146|6095|6097|10891	EZH2|RORA|RORC|PPARGC1A	-1.87505	Subtype_3
GO Biological Processes	19	GO:0007219	Notch signaling pathway	-3.45609	8.28396	5.691	22539	179	76	5	6.57895	2.84377	1999|6591|6774|8431|9971	ELF3|SNAI2|STAT3|NR0B2|NR1H4	-1.86245	Subtype_3
GO Biological Processes	19	GO:0003279	cardiac septum development	-3.43611	11.8626	6.33234	22539	100	76	4	5.26316	2.56139	4091|6659|6926|23414	SMAD6|SOX4|TBX3|ZFPM2	-1.84538	Subtype_3
GO Biological Processes	19	GO:0060537	muscle tissue development	-3.43562	5.26894	4.97234	22539	394	76	7	9.21053	3.31706	1831|2274|3131|6926|10891|23414|51176	TSC22D3|FHL2|HLF|TBX3|PPARGC1A|ZFPM2|LEF1	-1.84538	Subtype_3
GO Biological Processes	19	GO:1901214	regulation of neuron death	-3.42629	6.33237	5.23191	22539	281	76	6	7.89474	3.09317	142|468|1051|6774|10891|25793	PARP1|ATF4|CEBPB|STAT3|PPARGC1A|FBXO7	-1.84026	Subtype_3
GO Biological Processes	19	GO:0034599	cellular response to oxidative stress	-3.40182	6.26547	5.19414	22539	284	76	6	7.89474	3.09317	142|468|2034|2146|10891|25793	PARP1|ATF4|EPAS1|EZH2|PPARGC1A|FBXO7	-1.82106	Subtype_3
GO Biological Processes	19	GO:0061138	morphogenesis of a branching epithelium	-3.40126	8.05885	5.59225	22539	184	76	5	6.57895	2.84377	367|2099|6591|6926|51176	AR|ESR1|SNAI2|TBX3|LEF1	-1.82106	Subtype_3
GO Biological Processes	19	GO:0010942	positive regulation of cell death	-3.38732	3.98967	4.56608	22539	669	76	9	11.8421	3.70628	142|468|580|694|1871|6659|7027|7704|10891	PARP1|ATF4|BARD1|BTG1|E2F3|SOX4|TFDP1|ZBTB16|PPARGC1A	-1.81042	Subtype_3
GO Biological Processes	19	GO:1901215	negative regulation of neuron death	-3.35858	7.88739	5.51589	22539	188	76	5	6.57895	2.84377	468|1051|6774|10891|25793	ATF4|CEBPB|STAT3|PPARGC1A|FBXO7	-1.78658	Subtype_3
GO Biological Processes	19	GO:1904837	beta-catenin-TCF complex assembly	-3.35482	20.2204	7.42295	22539	44	76	3	3.94737	2.23358	7089|51176|83439	TLE2|LEF1|TCF7L1	-1.78525	Subtype_3
GO Biological Processes	19	GO:0070316	regulation of G0 to G1 transition	-3.35482	20.2204	7.42295	22539	44	76	3	3.94737	2.23358	2146|5931|7027	EZH2|RBBP7|TFDP1	-1.78525	Subtype_3
GO Biological Processes	19	GO:0097193	intrinsic apoptotic signaling pathway	-3.35376	6.13584	5.12019	22539	290	76	6	7.89474	3.09317	142|468|1051|2023|6591|57761	PARP1|ATF4|CEBPB|ENO1|SNAI2|TRIB3	-1.785	Subtype_3
GO Biological Processes	19	GO:0044773	mitotic DNA damage checkpoint	-3.34	11.1912	6.11735	22539	106	76	4	5.26316	2.56139	6659|7027|57472|79733	SOX4|TFDP1|CNOT6|E2F8	-1.77364	Subtype_3
GO Biological Processes	19	GO:0006006	glucose metabolic process	-3.33762	7.80436	5.47855	22539	190	76	5	6.57895	2.84377	468|2023|6095|6097|10891	ATF4|ENO1|RORA|RORC|PPARGC1A	-1.77206	Subtype_3
GO Biological Processes	19	GO:0046649	lymphocyte activation	-3.33146	3.91937	4.49975	22539	681	76	9	11.8421	3.70628	1051|6095|6097|6659|6774|7704|9935|25793|51176	CEBPB|RORA|RORC|SOX4|STAT3|ZBTB16|MAFB|FBXO7|LEF1	-1.76798	Subtype_3
GO Biological Processes	19	GO:0071103	DNA conformation change	-3.33016	6.07302	5.08399	22539	293	76	6	7.89474	3.09317	142|3148|3159|4171|4173|5931	PARP1|HMGB2|HMGA1|MCM2|MCM4|RBBP7	-1.7678	Subtype_3
GO Biological Processes	19	GO:0030857	negative regulation of epithelial cell differentiation	-3.32591	19.7711	7.33149	22539	45	76	3	3.94737	2.23358	2146|3397|6926	EZH2|ID1|TBX3	-1.76456	Subtype_3
GO Biological Processes	19	GO:0030218	erythrocyte differentiation	-3.32455	11.0866	6.0832	22539	107	76	4	5.26316	2.56139	2034|3148|6774|9935	EPAS1|HMGB2|STAT3|MAFB	-1.76456	Subtype_3
GO Biological Processes	19	GO:0051170	nuclear import	-3.31459	6.03185	5.06014	22539	295	76	6	7.89474	3.09317	142|6591|6628|6774|10140|10553	PARP1|SNAI2|SNRPB|STAT3|TOB1|HTATIP2	-1.75924	Subtype_3
GO Biological Processes	19	GO:0001816	cytokine production	-3.31311	3.89648	4.47798	22539	685	76	9	11.8421	3.70628	468|1051|3148|4094|6095|6591|9971|10623|51176	ATF4|CEBPB|HMGB2|MAF|RORA|SNAI2|NR1H4|POLR3C|LEF1	-1.75924	Subtype_3
GO Biological Processes	19	GO:0060541	respiratory system development	-3.30664	7.68305	5.42356	22539	193	76	5	6.57895	2.84377	2034|3397|4781|23414|51176	EPAS1|ID1|NFIB|ZFPM2|LEF1	-1.75426	Subtype_3
GO Biological Processes	19	GO:0045646	regulation of erythrocyte differentiation	-3.29767	19.3412	7.24294	22539	46	76	3	3.94737	2.23358	3148|6774|9935	HMGB2|STAT3|MAFB	-1.74859	Subtype_3
GO Biological Processes	19	GO:0048806	genitalia development	-3.29767	19.3412	7.24294	22539	46	76	3	3.94737	2.23358	367|2099|6926	AR|ESR1|TBX3	-1.74859	Subtype_3
GO Biological Processes	19	GO:0045023	G0 to G1 transition	-3.29767	19.3412	7.24294	22539	46	76	3	3.94737	2.23358	2146|5931|7027	EZH2|RBBP7|TFDP1	-1.74859	Subtype_3
GO Biological Processes	19	GO:1901990	regulation of mitotic cell cycle phase transition	-3.28856	4.97832	4.76965	22539	417	76	7	9.21053	3.31706	2146|6659|7027|9319|25793|57472|79733	EZH2|SOX4|TFDP1|TRIP13|FBXO7|CNOT6|E2F8	-1.74407	Subtype_3
GO Biological Processes	19	GO:0007389	pattern specification process	-3.27623	4.95456	4.75273	22539	419	76	7	9.21053	3.31706	367|2114|4091|6926|7704|9935|51176	AR|ETS2|SMAD6|TBX3|ZBTB16|MAFB|LEF1	-1.73327	Subtype_3
GO Biological Processes	19	GO:0001525	angiogenesis	-3.27439	4.30586	4.5698	22539	551	76	8	10.5263	3.5203	694|2034|3397|6095|6774|10553|51176|79733	BTG1|EPAS1|ID1|RORA|STAT3|HTATIP2|LEF1|E2F8	-1.73219	Subtype_3
GO Biological Processes	19	GO:0032330	regulation of chondrocyte differentiation	-3.27007	18.9297	7.15714	22539	47	76	3	3.94737	2.23358	4094|6591|7704	MAF|SNAI2|ZBTB16	-1.73165	Subtype_3
Reactome Gene Sets	6	R-HSA-1912422	Pre-NOTCH Expression and Processing	-3.27007	18.9297	7.15714	22539	47	76	3	3.94737	2.23358	1871|1999|7027	E2F3|ELF3|TFDP1	-1.73165	Subtype_3
GO Biological Processes	19	GO:1900372	negative regulation of purine nucleotide biosynthetic process	-3.27007	18.9297	7.15714	22539	47	76	3	3.94737	2.23358	142|6774|10891	PARP1|STAT3|PPARGC1A	-1.73165	Subtype_3
GO Biological Processes	19	GO:0045599	negative regulation of fat cell differentiation	-3.27007	18.9297	7.15714	22539	47	76	3	3.94737	2.23358	6095|23414|57761	RORA|ZFPM2|TRIB3	-1.73165	Subtype_3
GO Biological Processes	19	GO:0030809	negative regulation of nucleotide biosynthetic process	-3.27007	18.9297	7.15714	22539	47	76	3	3.94737	2.23358	142|6774|10891	PARP1|STAT3|PPARGC1A	-1.73165	Subtype_3
GO Biological Processes	19	GO:0007420	brain development	-3.26784	3.84042	4.42425	22539	695	76	9	11.8421	3.70628	2146|3397|4781|6095|6926|9915|9935|10891|51176	EZH2|ID1|NFIB|RORA|TBX3|ARNT2|MAFB|PPARGC1A|LEF1	-1.73091	Subtype_3
GO Biological Processes	19	GO:0001763	morphogenesis of a branching structure	-3.26616	7.52705	5.35204	22539	197	76	5	6.57895	2.84377	367|2099|6591|6926|51176	AR|ESR1|SNAI2|TBX3|LEF1	-1.72998	Subtype_3
GO Biological Processes	19	GO:0072089	stem cell proliferation	-3.26431	10.6871	5.95098	22539	111	76	4	5.26316	2.56139	3148|6591|6926|51176	HMGB2|SNAI2|TBX3|LEF1	-1.72962	Subtype_3
GO Biological Processes	19	GO:0043500	muscle adaptation	-3.26431	10.6871	5.95098	22539	111	76	4	5.26316	2.56139	142|2146|9569|10891	PARP1|EZH2|GTF2IRD1|PPARGC1A	-1.72962	Subtype_3
GO Biological Processes	19	GO:0044774	mitotic DNA integrity checkpoint	-3.24962	10.5916	5.91898	22539	112	76	4	5.26316	2.56139	6659|7027|57472|79733	SOX4|TFDP1|CNOT6|E2F8	-1.71864	Subtype_3
GO Biological Processes	19	GO:0006805	xenobiotic metabolic process	-3.23507	10.4979	5.88737	22539	113	76	4	5.26316	2.56139	6095|6097|8856|9915	RORA|RORC|NR1I2|ARNT2	-1.70483	Subtype_3
GO Biological Processes	19	GO:0048568	embryonic organ development	-3.23363	4.87315	4.69435	22539	426	76	7	9.21053	3.31706	1051|2034|6926|9935|23414|51176|79733	CEBPB|EPAS1|TBX3|MAFB|ZFPM2|LEF1|E2F8	-1.70412	Subtype_3
GO Biological Processes	19	GO:0033044	regulation of chromosome organization	-3.23104	5.81502	4.93276	22539	306	76	6	7.89474	3.09317	142|3159|6591|9232|9319|10891	PARP1|HMGA1|SNAI2|PTTG1|TRIP13|PPARGC1A	-1.70301	Subtype_3
GO Biological Processes	19	GO:0051101	regulation of DNA binding	-3.22066	10.4058	5.85617	22539	114	76	4	5.26316	2.56139	142|3148|3397|51176	PARP1|HMGB2|ID1|LEF1	-1.69555	Subtype_3
GO Biological Processes	19	GO:0045667	regulation of osteoblast differentiation	-3.22066	10.4058	5.85617	22539	114	76	4	5.26316	2.56139	1051|3397|6591|10140	CEBPB|ID1|SNAI2|TOB1	-1.69555	Subtype_3
Reactome Gene Sets	6	R-HSA-6791312	TP53 Regulates Transcription of Cell Cycle Genes	-3.21671	18.1571	6.99323	22539	49	76	3	3.94737	2.23358	7027|57472|79733	TFDP1|CNOT6|E2F8	-1.6945	Subtype_3
GO Biological Processes	19	GO:0051055	negative regulation of lipid biosynthetic process	-3.21671	18.1571	6.99323	22539	49	76	3	3.94737	2.23358	6591|9971|57761	SNAI2|NR1H4|TRIB3	-1.6945	Subtype_3
GO Biological Processes	19	GO:0034101	erythrocyte homeostasis	-3.20639	10.3153	5.82534	22539	115	76	4	5.26316	2.56139	2034|3148|6774|9935	EPAS1|HMGB2|STAT3|MAFB	-1.68779	Subtype_3
GO Biological Processes	19	GO:0046660	female sex differentiation	-3.19225	10.2264	5.79489	22539	116	76	4	5.26316	2.56139	1051|2099|6926|23414	CEBPB|ESR1|TBX3|ZFPM2	-1.6758	Subtype_3
GO Biological Processes	19	GO:0006979	response to oxidative stress	-3.18007	4.77232	4.62114	22539	435	76	7	9.21053	3.31706	142|468|694|2034|2146|10891|25793	PARP1|ATF4|BTG1|EPAS1|EZH2|PPARGC1A|FBXO7	-1.66504	Subtype_3
GO Biological Processes	19	GO:0070997	neuron death	-3.15806	5.631	4.82222	22539	316	76	6	7.89474	3.09317	142|468|1051|6774|10891|25793	PARP1|ATF4|CEBPB|STAT3|PPARGC1A|FBXO7	-1.64967	Subtype_3
GO Biological Processes	19	GO:0003231	cardiac ventricle development	-3.1235	9.80383	5.64802	22539	121	76	4	5.26316	2.56139	4091|6659|6926|23414	SMAD6|SOX4|TBX3|ZFPM2	-1.6266	Subtype_3
GO Biological Processes	19	GO:0010675	regulation of cellular carbohydrate metabolic process	-3.1235	9.80383	5.64802	22539	121	76	4	5.26316	2.56139	6095|6097|6774|10891	RORA|RORC|STAT3|PPARGC1A	-1.6266	Subtype_3
GO Biological Processes	19	GO:0016570	histone modification	-3.1221	4.66508	4.5421	22539	445	76	7	9.21053	3.31706	2146|5931|6591|9971|10891|51176|51547	EZH2|RBBP7|SNAI2|NR1H4|PPARGC1A|LEF1|SIRT7	-1.62589	Subtype_3
GO Biological Processes	19	GO:0048598	embryonic morphogenesis	-3.11438	4.06951	4.36775	22539	583	76	8	10.5263	3.5203	367|2114|3899|6659|6926|7704|9935|51176	AR|ETS2|AFF3|SOX4|TBX3|ZBTB16|MAFB|LEF1	-1.61952	Subtype_3
GO Biological Processes	19	GO:0060322	head development	-3.11145	3.65129	4.23876	22539	731	76	9	11.8421	3.70628	2146|3397|4781|6095|6926|9915|9935|10891|51176	EZH2|ID1|NFIB|RORA|TBX3|ARNT2|MAFB|PPARGC1A|LEF1	-1.61753	Subtype_3
Reactome Gene Sets	6	R-HSA-5619507	Activation of HOX genes during differentiation	-3.11013	9.72347	5.61967	22539	122	76	4	5.26316	2.56139	2146|5931|9935|57472	EZH2|RBBP7|MAFB|CNOT6	-1.61753	Subtype_3
Reactome Gene Sets	6	R-HSA-5617472	Activation of anterior HOX genes in hindbrain development during early embryogenesis	-3.11013	9.72347	5.61967	22539	122	76	4	5.26316	2.56139	2146|5931|9935|57472	EZH2|RBBP7|MAFB|CNOT6	-1.61753	Subtype_3
GO Biological Processes	19	GO:0008406	gonad development	-3.10389	6.92911	5.0691	22539	214	76	5	6.57895	2.84377	367|1051|2099|3148|23414	AR|CEBPB|ESR1|HMGB2|ZFPM2	-1.61511	Subtype_3
GO Biological Processes	19	GO:1903706	regulation of hemopoiesis	-3.09936	4.62352	4.51114	22539	449	76	7	9.21053	3.31706	1051|3148|6774|7704|9935|25793|51176	CEBPB|HMGB2|STAT3|ZBTB16|MAFB|FBXO7|LEF1	-1.61179	Subtype_3
GO Biological Processes	19	GO:2001251	negative regulation of chromosome organization	-3.09687	9.64442	5.59165	22539	123	76	4	5.26316	2.56139	142|3159|9232|9319	PARP1|HMGA1|PTTG1|TRIP13	-1.61076	Subtype_3
GO Biological Processes	19	GO:0060563	neuroepithelial cell differentiation	-3.09282	16.4759	6.62272	22539	54	76	3	3.94737	2.23358	1051|6659|51176	CEBPB|SOX4|LEF1	-1.60804	Subtype_3
GO Biological Processes	19	GO:1901987	regulation of cell cycle phase transition	-3.08246	4.59283	4.48816	22539	452	76	7	9.21053	3.31706	2146|6659|7027|9319|25793|57472|79733	EZH2|SOX4|TFDP1|TRIP13|FBXO7|CNOT6|E2F8	-1.60427	Subtype_3
Reactome Gene Sets	6	R-HSA-2559580	Oxidative Stress Induced Senescence	-3.07071	9.49011	5.53655	22539	125	76	4	5.26316	2.56139	1871|2146|5931|7027	E2F3|EZH2|RBBP7|TFDP1	-1.59513	Subtype_3
GO Biological Processes	19	GO:0060688	regulation of morphogenesis of a branching structure	-3.06951	16.1763	6.55453	22539	55	76	3	3.94737	2.23358	367|2099|6591	AR|ESR1|SNAI2	-1.59458	Subtype_3
GO Biological Processes	19	GO:0044283	small molecule biosynthetic process	-3.06562	3.59716	4.1844	22539	742	76	9	11.8421	3.70628	468|2023|6591|6774|9971|10891|23408|23541|57761	ATF4|ENO1|SNAI2|STAT3|NR1H4|PPARGC1A|SIRT5|SEC14L2|TRIB3	-1.59134	Subtype_3
GO Biological Processes	19	GO:0000075	cell cycle checkpoint	-3.05893	6.77091	4.99171	22539	219	76	5	6.57895	2.84377	6659|7027|9319|57472|79733	SOX4|TFDP1|TRIP13|CNOT6|E2F8	-1.58578	Subtype_3
Reactome Gene Sets	6	R-HSA-157118	Signaling by NOTCH	-3.0578	9.41479	5.50946	22539	126	76	4	5.26316	2.56139	1871|1999|7027|7089	E2F3|ELF3|TFDP1|TLE2	-1.58578	Subtype_3
GO Biological Processes	19	GO:0045137	development of primary sexual characteristics	-3.05007	6.74013	4.97653	22539	220	76	5	6.57895	2.84377	367|1051|2099|3148|23414	AR|CEBPB|ESR1|HMGB2|ZFPM2	-1.58031	Subtype_3
GO Biological Processes	19	GO:0014888	striated muscle adaptation	-3.04665	15.8875	6.48811	22539	56	76	3	3.94737	2.23358	2146|9569|10891	EZH2|GTF2IRD1|PPARGC1A	-1.57787	Subtype_3
GO Biological Processes	19	GO:0035113	embryonic appendage morphogenesis	-3.045	9.34065	5.48267	22539	127	76	4	5.26316	2.56139	3899|6926|7704|51176	AFF3|TBX3|ZBTB16|LEF1	-1.57779	Subtype_3
GO Biological Processes	19	GO:0030326	embryonic limb morphogenesis	-3.045	9.34065	5.48267	22539	127	76	4	5.26316	2.56139	3899|6926|7704|51176	AFF3|TBX3|ZBTB16|LEF1	-1.57779	Subtype_3
GO Biological Processes	19	GO:1900543	negative regulation of purine nucleotide metabolic process	-3.02421	15.6087	6.42337	22539	57	76	3	3.94737	2.23358	142|6774|10891	PARP1|STAT3|PPARGC1A	-1.56271	Subtype_3
GO Biological Processes	19	GO:0030520	intracellular estrogen receptor signaling pathway	-3.0022	15.3396	6.36025	22539	58	76	3	3.94737	2.23358	142|367|2099	PARP1|AR|ESR1	-1.54554	Subtype_3
GO Biological Processes	19	GO:0070059	intrinsic apoptotic signaling pathway in response to endoplasmic reticulum stress	-3.0022	15.3396	6.36025	22539	58	76	3	3.94737	2.23358	468|1051|57761	ATF4|CEBPB|TRIB3	-1.54554	Subtype_3
GO Biological Processes	19	GO:0045980	negative regulation of nucleotide metabolic process	-3.0022	15.3396	6.36025	22539	58	76	3	3.94737	2.23358	142|6774|10891	PARP1|STAT3|PPARGC1A	-1.54554	Subtype_3
GO Biological Processes	19	GO:0030111	regulation of Wnt signaling pathway	-3.00001	5.24895	4.58496	22539	339	76	6	7.89474	3.09317	2099|6591|6659|7089|51176|83439	ESR1|SNAI2|SOX4|TLE2|LEF1|TCF7L1	-1.54413	Subtype_3
GO Biological Processes	19	GO:0007498	mesoderm development	-2.9949	9.05544	5.37841	22539	131	76	4	5.26316	2.56139	2114|6926|23414|51176	ETS2|TBX3|ZFPM2|LEF1	-1.5415	Subtype_3
GO Biological Processes	19	GO:0043124	negative regulation of I-kappaB kinase/NF-kappaB signaling	-2.98058	15.0796	6.29868	22539	59	76	3	3.94737	2.23358	2099|6095|9971	ESR1|RORA|NR1H4	-1.52842	Subtype_3
GO Biological Processes	19	GO:0043065	positive regulation of apoptotic process	-2.96496	3.85777	4.1796	22539	615	76	8	10.5263	3.5203	468|580|694|1871|6659|7027|7704|10891	ATF4|BARD1|BTG1|E2F3|SOX4|TFDP1|ZBTB16|PPARGC1A	-1.51586	Subtype_3
GO Biological Processes	19	GO:0045600	positive regulation of fat cell differentiation	-2.95936	14.8283	6.23859	22539	60	76	3	3.94737	2.23358	1051|6591|7704	CEBPB|SNAI2|ZBTB16	-1.51093	Subtype_3
GO Biological Processes	19	GO:0019318	hexose metabolic process	-2.95562	6.41917	4.81548	22539	231	76	5	6.57895	2.84377	468|2023|6095|6097|10891	ATF4|ENO1|RORA|RORC|PPARGC1A	-1.51093	Subtype_3
GO Biological Processes	19	GO:0045814	negative regulation of gene expression, epigenetic	-2.94645	8.78713	5.27852	22539	135	76	4	5.26316	2.56139	2146|3159|5931|23408	EZH2|HMGA1|RBBP7|SIRT5	-1.50403	Subtype_3
GO Biological Processes	19	GO:0001817	regulation of cytokine production	-2.9425	3.82666	4.15135	22539	620	76	8	10.5263	3.5203	468|1051|3148|6095|6591|9971|10623|51176	ATF4|CEBPB|HMGB2|RORA|SNAI2|NR1H4|POLR3C|LEF1	-1.50128	Subtype_3
Reactome Gene Sets	6	R-HSA-8943724	Regulation of PTEN gene transcription	-2.9385	14.5852	6.17992	22539	61	76	3	3.94737	2.23358	2146|5931|6591	EZH2|RBBP7|SNAI2	-1.49862	Subtype_3
GO Biological Processes	19	GO:2000756	regulation of peptidyl-lysine acetylation	-2.9385	14.5852	6.17992	22539	61	76	3	3.94737	2.23358	6591|6659|10891	SNAI2|SOX4|PPARGC1A	-1.49862	Subtype_3
GO Biological Processes	19	GO:0043068	positive regulation of programmed cell death	-2.93804	3.82049	4.14573	22539	621	76	8	10.5263	3.5203	468|580|694|1871|6659|7027|7704|10891	ATF4|BARD1|BTG1|E2F3|SOX4|TFDP1|ZBTB16|PPARGC1A	-1.49862	Subtype_3
GO Biological Processes	19	GO:0008584	male gonad development	-2.93459	8.72252	5.2542	22539	136	76	4	5.26316	2.56139	367|2099|3148|23414	AR|ESR1|HMGB2|ZFPM2	-1.49636	Subtype_3
GO Biological Processes	19	GO:0046546	development of primary male sexual characteristics	-2.92282	8.65886	5.23012	22539	137	76	4	5.26316	2.56139	367|2099|3148|23414	AR|ESR1|HMGB2|ZFPM2	-1.48728	Subtype_3
Reactome Gene Sets	6	R-HSA-8951664	Neddylation	-2.92253	6.30991	4.75949	22539	235	76	5	6.57895	2.84377	2034|5931|7704|25793|140462	EPAS1|RBBP7|ZBTB16|FBXO7|ASB9	-1.48728	Subtype_3
GO Biological Processes	19	GO:0051129	negative regulation of cellular component organization	-2.92027	3.79604	4.12338	22539	625	76	8	10.5263	3.5203	142|367|3159|3397|4091|9232|9319|10891	PARP1|AR|HMGA1|ID1|SMAD6|PTTG1|TRIP13|PPARGC1A	-1.48561	Subtype_3
GO Biological Processes	19	GO:0072091	regulation of stem cell proliferation	-2.91801	14.35	6.12262	22539	62	76	3	3.94737	2.23358	3148|6591|6926	HMGB2|SNAI2|TBX3	-1.48394	Subtype_3
GO Biological Processes	19	GO:0050678	regulation of epithelial cell proliferation	-2.91617	5.0551	4.4602	22539	352	76	6	7.89474	3.09317	367|3148|3397|4781|6591|6774	AR|HMGB2|ID1|NFIB|SNAI2|STAT3	-1.48337	Subtype_3
GO Biological Processes	19	GO:0002262	myeloid cell homeostasis	-2.89956	8.53427	5.18269	22539	139	76	4	5.26316	2.56139	2034|3148|6774|9935	EPAS1|HMGB2|STAT3|MAFB	-1.47136	Subtype_3
Canonical Pathways	11	M200	PID ERA GENOMIC PATHWAY	-2.87807	13.9015	6.0119	22539	64	76	3	3.94737	2.23358	1051|2099|8431	CEBPB|ESR1|NR0B2	-1.45622	Subtype_3
GO Biological Processes	19	GO:0009880	embryonic pattern specification	-2.87807	13.9015	6.0119	22539	64	76	3	3.94737	2.23358	4091|6926|7704	SMAD6|TBX3|ZBTB16	-1.45622	Subtype_3
GO Biological Processes	19	GO:0006754	ATP biosynthetic process	-2.86537	8.35397	5.1133	22539	142	76	4	5.26316	2.56139	142|2023|6774|10891	PARP1|ENO1|STAT3|PPARGC1A	-1.44867	Subtype_3
GO Biological Processes	19	GO:0061035	regulation of cartilage development	-2.85859	13.6877	5.95838	22539	65	76	3	3.94737	2.23358	4094|6591|7704	MAF|SNAI2|ZBTB16	-1.44416	Subtype_3
Canonical Pathways	11	M279	PID RB 1PATHWAY	-2.85859	13.6877	5.95838	22539	65	76	3	3.94737	2.23358	1051|1871|7027	CEBPB|E2F3|TFDP1	-1.44416	Subtype_3
GO Biological Processes	19	GO:1900373	positive regulation of purine nucleotide biosynthetic process	-2.85859	13.6877	5.95838	22539	65	76	3	3.94737	2.23358	2023|6774|10891	ENO1|STAT3|PPARGC1A	-1.44416	Subtype_3
GO Biological Processes	19	GO:0030810	positive regulation of nucleotide biosynthetic process	-2.85859	13.6877	5.95838	22539	65	76	3	3.94737	2.23358	2023|6774|10891	ENO1|STAT3|PPARGC1A	-1.44416	Subtype_3
GO Biological Processes	19	GO:0065004	protein-DNA complex assembly	-2.85041	6.07717	4.63813	22539	244	76	5	6.57895	2.84377	142|2099|3148|4171|5931	PARP1|ESR1|HMGB2|MCM2|RBBP7	-1.4371	Subtype_3
Reactome Gene Sets	6	R-HSA-1640170	Cell Cycle	-2.84634	3.69552	4.03041	22539	642	76	8	10.5263	3.5203	580|1871|2305|4171|4173|5931|7027|9232	BARD1|E2F3|FOXM1|MCM2|MCM4|RBBP7|TFDP1|PTTG1	-1.43518	Subtype_3
KEGG Pathway	24	hsa05224	Breast cancer	-2.84301	8.23794	5.06817	22539	144	76	4	5.26316	2.56139	1871|2099|51176|83439	E2F3|ESR1|LEF1|TCF7L1	-1.43252	Subtype_3
GO Biological Processes	19	GO:1901861	regulation of muscle tissue development	-2.821	8.12509	5.0239	22539	146	76	4	5.26316	2.56139	1831|10891|23414|51176	TSC22D3|PPARGC1A|ZFPM2|LEF1	-1.41677	Subtype_3
Reactome Gene Sets	6	R-HSA-453279	Mitotic G1-G1/S phases	-2.81012	8.06982	5.00208	22539	147	76	4	5.26316	2.56139	1871|4171|4173|7027	E2F3|MCM2|MCM4|TFDP1	-1.40988	Subtype_3
GO Biological Processes	19	GO:0032024	positive regulation of insulin secretion	-2.80204	13.0838	5.80466	22539	68	76	3	3.94737	2.23358	6659|8431|9971	SOX4|NR0B2|NR1H4	-1.40478	Subtype_3
Reactome Gene Sets	6	R-HSA-68867	Assembly of the pre-replicative complex	-2.80204	13.0838	5.80466	22539	68	76	3	3.94737	2.23358	1871|4171|4173	E2F3|MCM2|MCM4	-1.40478	Subtype_3
GO Biological Processes	19	GO:1900371	regulation of purine nucleotide biosynthetic process	-2.79932	8.01529	4.98047	22539	148	76	4	5.26316	2.56139	142|2023|6774|10891	PARP1|ENO1|STAT3|PPARGC1A	-1.40314	Subtype_3
GO Biological Processes	19	GO:0040008	regulation of growth	-2.79564	3.62772	3.96666	22539	654	76	8	10.5263	3.5203	367|694|2023|5931|6595|6774|23414|51176	AR|BTG1|ENO1|RBBP7|SMARCA2|STAT3|ZFPM2|LEF1	-1.40054	Subtype_3
GO Biological Processes	19	GO:0030808	regulation of nucleotide biosynthetic process	-2.7886	7.9615	4.95906	22539	149	76	4	5.26316	2.56139	142|2023|6774|10891	PARP1|ENO1|STAT3|PPARGC1A	-1.39512	Subtype_3
GO Biological Processes	19	GO:0001890	placenta development	-2.77796	7.90842	4.93785	22539	150	76	4	5.26316	2.56139	1051|2034|51176|79733	CEBPB|EPAS1|LEF1|E2F8	-1.38609	Subtype_3
GO Biological Processes	19	GO:1902105	regulation of leukocyte differentiation	-2.7663	5.81502	4.49782	22539	255	76	5	6.57895	2.84377	1051|7704|9935|25793|51176	CEBPB|ZBTB16|MAFB|FBXO7|LEF1	-1.37914	Subtype_3
GO Biological Processes	19	GO:0040029	regulation of gene expression, epigenetic	-2.76592	4.04671	4.06024	22539	513	76	7	9.21053	3.31706	2099|2146|3159|5931|6774|23408|57472	ESR1|EZH2|HMGA1|RBBP7|STAT3|SIRT5|CNOT6	-1.37914	Subtype_3
Canonical Pathways	11	M167	PID AP1 PATHWAY	-2.76581	12.71	5.70746	22539	70	76	3	3.94737	2.23358	2099|4094|4097	ESR1|MAF|MAFG	-1.37914	Subtype_3
GO Biological Processes	19	GO:1901983	regulation of protein acetylation	-2.76581	12.71	5.70746	22539	70	76	3	3.94737	2.23358	6591|6659|10891	SNAI2|SOX4|PPARGC1A	-1.37914	Subtype_3
GO Biological Processes	19	GO:0014706	striated muscle tissue development	-2.76484	4.71988	4.23668	22539	377	76	6	7.89474	3.09317	1831|2274|3131|6926|23414|51176	TSC22D3|FHL2|HLF|TBX3|ZFPM2|LEF1	-1.37914	Subtype_3
GO Biological Processes	19	GO:0048754	branching morphogenesis of an epithelial tube	-2.75692	7.80436	4.89601	22539	152	76	4	5.26316	2.56139	367|2099|6926|51176	AR|ESR1|TBX3|LEF1	-1.37301	Subtype_3
GO Biological Processes	19	GO:0042063	gliogenesis	-2.75146	5.76976	4.47318	22539	257	76	5	6.57895	2.84377	2146|4781|6659|6774|51176	EZH2|NFIB|SOX4|STAT3|LEF1	-1.36914	Subtype_3
GO Biological Processes	19	GO:0006310	DNA recombination	-2.75146	5.76976	4.47318	22539	257	76	5	6.57895	2.84377	142|580|3148|9319|51176	PARP1|BARD1|HMGB2|TRIP13|LEF1	-1.36914	Subtype_3
Reactome Gene Sets	6	R-HSA-1257604	PIP3 activates AKT signaling	-2.75146	5.76976	4.47318	22539	257	76	5	6.57895	2.84377	2099|2146|5931|6591|57761	ESR1|EZH2|RBBP7|SNAI2|TRIB3	-1.36914	Subtype_3
GO Biological Processes	19	GO:0030279	negative regulation of ossification	-2.74811	12.5309	5.66034	22539	71	76	3	3.94737	2.23358	3397|4091|10140	ID1|SMAD6|TOB1	-1.36739	Subtype_3
GO Biological Processes	19	GO:0009206	purine ribonucleoside triphosphate biosynthetic process	-2.74651	7.75335	4.87537	22539	153	76	4	5.26316	2.56139	142|2023|6774|10891	PARP1|ENO1|STAT3|PPARGC1A	-1.36732	Subtype_3
GO Biological Processes	19	GO:2001233	regulation of apoptotic signaling pathway	-2.74174	4.67033	4.20274	22539	381	76	6	7.89474	3.09317	142|367|2023|3148|6591|7027	PARP1|AR|ENO1|HMGB2|SNAI2|TFDP1	-1.36307	Subtype_3
KEGG Pathway	24	hsa04390	Hippo signaling pathway	-2.73618	7.70301	4.85492	22539	154	76	4	5.26316	2.56139	3397|6591|51176|83439	ID1|SNAI2|LEF1|TCF7L1	-1.35907	Subtype_3
GO Biological Processes	19	GO:0009145	purine nucleoside triphosphate biosynthetic process	-2.73618	7.70301	4.85492	22539	154	76	4	5.26316	2.56139	142|2023|6774|10891	PARP1|ENO1|STAT3|PPARGC1A	-1.35907	Subtype_3
GO Biological Processes	19	GO:0000077	DNA damage checkpoint	-2.73618	7.70301	4.85492	22539	154	76	4	5.26316	2.56139	6659|7027|57472|79733	SOX4|TFDP1|CNOT6|E2F8	-1.35907	Subtype_3
GO Biological Processes	19	GO:0007283	spermatogenesis	-2.73259	3.99223	4.0154	22539	520	76	7	9.21053	3.31706	367|694|3148|6595|7704|9232|9319	AR|BTG1|HMGB2|SMARCA2|ZBTB16|PTTG1|TRIP13	-1.356	Subtype_3
KEGG Pathway	24	hsa04520	Adherens junction	-2.73067	12.3569	5.61416	22539	72	76	3	3.94737	2.23358	6591|51176|83439	SNAI2|LEF1|TCF7L1	-1.35459	Subtype_3
GO Biological Processes	19	GO:0007346	regulation of mitotic cell cycle	-2.71776	3.5253	3.86871	22539	673	76	8	10.5263	3.5203	2146|6659|7027|9232|9319|25793|57472|79733	EZH2|SOX4|TFDP1|PTTG1|TRIP13|FBXO7|CNOT6|E2F8	-1.34375	Subtype_3
GO Biological Processes	19	GO:0018205	peptidyl-lysine modification	-2.70764	4.59792	4.1527	22539	387	76	6	7.89474	3.09317	2146|6591|6659|10891|23408|51176	EZH2|SNAI2|SOX4|PPARGC1A|SIRT5|LEF1	-1.33671	Subtype_3
Canonical Pathways	11	M40	PID E2F PATHWAY	-2.69657	12.0229	5.52447	22539	74	76	3	3.94737	2.23358	1871|6595|7027	E2F3|SMARCA2|TFDP1	-1.32882	Subtype_3
GO Biological Processes	19	GO:0046823	negative regulation of nucleocytoplasmic transport	-2.69657	12.0229	5.52447	22539	74	76	3	3.94737	2.23358	580|6591|6659	BARD1|SNAI2|SOX4	-1.32882	Subtype_3
GO Biological Processes	19	GO:0030509	BMP signaling pathway	-2.69559	7.50799	4.77493	22539	158	76	4	5.26316	2.56139	3397|4091|10140|51176	ID1|SMAD6|TOB1|LEF1	-1.32882	Subtype_3
GO Biological Processes	19	GO:0006281	DNA repair	-2.68594	3.91691	3.95267	22539	530	76	7	9.21053	3.31706	142|580|2305|3148|3159|9232|9319	PARP1|BARD1|FOXM1|HMGB2|HMGA1|PTTG1|TRIP13	-1.32128	Subtype_3
GO Biological Processes	19	GO:0030308	negative regulation of cell growth	-2.68563	7.46077	4.75536	22539	159	76	4	5.26316	2.56139	694|2023|5931|6595	BTG1|ENO1|RBBP7|SMARCA2	-1.32128	Subtype_3
GO Biological Processes	19	GO:0009201	ribonucleoside triphosphate biosynthetic process	-2.68563	7.46077	4.75536	22539	159	76	4	5.26316	2.56139	142|2023|6774|10891	PARP1|ENO1|STAT3|PPARGC1A	-1.32128	Subtype_3
GO Biological Processes	19	GO:1903201	regulation of oxidative stress-induced cell death	-2.67988	11.8626	5.48091	22539	75	76	3	3.94737	2.23358	142|468|25793	PARP1|ATF4|FBXO7	-1.31805	Subtype_3
GO Biological Processes	19	GO:0033143	regulation of intracellular steroid hormone receptor signaling pathway	-2.67988	11.8626	5.48091	22539	75	76	3	3.94737	2.23358	142|367|2099	PARP1|AR|ESR1	-1.31805	Subtype_3
GO Biological Processes	19	GO:0071222	cellular response to lipopolysaccharide	-2.67573	7.41414	4.73597	22539	160	76	4	5.26316	2.56139	1051|3148|9971|10891	CEBPB|HMGB2|NR1H4|PPARGC1A	-1.31539	Subtype_3
GO Biological Processes	19	GO:0009410	response to xenobiotic stimulus	-2.67217	5.53294	4.34219	22539	268	76	5	6.57895	2.84377	6095|6097|8856|9915|10891	RORA|RORC|NR1I2|ARNT2|PPARGC1A	-1.31233	Subtype_3
GO Biological Processes	19	GO:0018394	peptidyl-lysine acetylation	-2.6659	7.36809	4.71674	22539	161	76	4	5.26316	2.56139	6591|6659|10891|51176	SNAI2|SOX4|PPARGC1A|LEF1	-1.30707	Subtype_3
GO Biological Processes	19	GO:0003151	outflow tract morphogenesis	-2.66344	11.7065	5.43817	22539	76	76	3	3.94737	2.23358	4091|6926|23414	SMAD6|TBX3|ZFPM2	-1.30707	Subtype_3
Reactome Gene Sets	6	R-HSA-69304	Regulation of DNA replication	-2.66344	11.7065	5.43817	22539	76	76	3	3.94737	2.23358	1871|4171|4173	E2F3|MCM2|MCM4	-1.30707	Subtype_3
GO Biological Processes	19	GO:0042632	cholesterol homeostasis	-2.66344	11.7065	5.43817	22539	76	76	3	3.94737	2.23358	2494|6095|9971	NR5A2|RORA|NR1H4	-1.30707	Subtype_3
GO Biological Processes	19	GO:0055092	sterol homeostasis	-2.66344	11.7065	5.43817	22539	76	76	3	3.94737	2.23358	2494|6095|9971	NR5A2|RORA|NR1H4	-1.30707	Subtype_3
GO Biological Processes	19	GO:0007507	heart development	-2.65848	3.87306	3.91577	22539	536	76	7	9.21053	3.31706	2274|3397|4091|6591|6659|6926|23414	FHL2|ID1|SMAD6|SNAI2|SOX4|TBX3|ZFPM2	-1.30397	Subtype_3
GO Biological Processes	19	GO:1902532	negative regulation of intracellular signal transduction	-2.64941	3.85866	3.90358	22539	538	76	7	9.21053	3.31706	2023|2099|2305|6095|6591|9971|57761	ENO1|ESR1|FOXM1|RORA|SNAI2|NR1H4|TRIB3	-1.29889	Subtype_3
GO Biological Processes	19	GO:0031100	animal organ regeneration	-2.64723	11.5545	5.39622	22539	77	76	3	3.94737	2.23358	1051|2146|8431	CEBPB|EZH2|NR0B2	-1.29889	Subtype_3
GO Biological Processes	19	GO:0031570	DNA integrity checkpoint	-2.64645	7.27769	4.67878	22539	163	76	4	5.26316	2.56139	6659|7027|57472|79733	SOX4|TFDP1|CNOT6|E2F8	-1.29889	Subtype_3
GO Biological Processes	19	GO:0002285	lymphocyte activation involved in immune response	-2.64645	7.27769	4.67878	22539	163	76	4	5.26316	2.56139	6095|6097|6774|51176	RORA|RORC|STAT3|LEF1	-1.29889	Subtype_3
GO Biological Processes	19	GO:0048232	male gamete generation	-2.64489	3.8515	3.89751	22539	539	76	7	9.21053	3.31706	367|694|3148|6595|7704|9232|9319	AR|BTG1|HMGB2|SMARCA2|ZBTB16|PTTG1|TRIP13	-1.29781	Subtype_3
GO Biological Processes	19	GO:0009168	purine ribonucleoside monophosphate biosynthetic process	-2.63682	7.23331	4.66004	22539	164	76	4	5.26316	2.56139	142|2023|6774|10891	PARP1|ENO1|STAT3|PPARGC1A	-1.29216	Subtype_3
GO Biological Processes	19	GO:0009127	purine nucleoside monophosphate biosynthetic process	-2.63682	7.23331	4.66004	22539	164	76	4	5.26316	2.56139	142|2023|6774|10891	PARP1|ENO1|STAT3|PPARGC1A	-1.29216	Subtype_3
GO Biological Processes	19	GO:0005996	monosaccharide metabolic process	-2.6305	5.41178	4.27375	22539	274	76	5	6.57895	2.84377	468|2023|6095|6097|10891	ATF4|ENO1|RORA|RORC|PPARGC1A	-1.28679	Subtype_3
GO Biological Processes	19	GO:0010565	regulation of cellular ketone metabolic process	-2.62726	7.18947	4.64146	22539	165	76	4	5.26316	2.56139	9971|10891|23408|57761	NR1H4|PPARGC1A|SIRT5|TRIB3	-1.28404	Subtype_3
GO Biological Processes	19	GO:0006338	chromatin remodeling	-2.61777	7.14616	4.62303	22539	166	76	4	5.26316	2.56139	2099|3159|5931|6595	ESR1|HMGA1|RBBP7|SMARCA2	-1.27598	Subtype_3
Canonical Pathways	11	M66	PID MYC ACTIV PATHWAY	-2.61547	11.262	5.3146	22539	79	76	3	3.94737	2.23358	1871|2023|3159	E2F3|ENO1|HMGA1	-1.27511	Subtype_3
GO Biological Processes	19	GO:0030324	lung development	-2.60834	7.10337	4.60475	22539	167	76	4	5.26316	2.56139	2034|3397|4781|23414	EPAS1|ID1|NFIB|ZFPM2	-1.27063	Subtype_3
GO Biological Processes	19	GO:0031497	chromatin assembly	-2.60834	7.10337	4.60475	22539	167	76	4	5.26316	2.56139	3148|3159|4171|5931	HMGB2|HMGA1|MCM2|RBBP7	-1.27063	Subtype_3
GO Biological Processes	19	GO:0006094	gluconeogenesis	-2.59992	11.1212	5.27489	22539	80	76	3	3.94737	2.23358	468|2023|10891	ATF4|ENO1|PPARGC1A	-1.26429	Subtype_3
GO Biological Processes	19	GO:0071219	cellular response to molecule of bacterial origin	-2.59897	7.06109	4.58663	22539	168	76	4	5.26316	2.56139	1051|3148|9971|10891	CEBPB|HMGB2|NR1H4|PPARGC1A	-1.26382	Subtype_3
GO Biological Processes	19	GO:0009142	nucleoside triphosphate biosynthetic process	-2.58042	6.97802	4.55081	22539	170	76	4	5.26316	2.56139	142|2023|6774|10891	PARP1|ENO1|STAT3|PPARGC1A	-1.24995	Subtype_3
GO Biological Processes	19	GO:0071772	response to BMP	-2.58042	6.97802	4.55081	22539	170	76	4	5.26316	2.56139	3397|4091|10140|51176	ID1|SMAD6|TOB1|LEF1	-1.24995	Subtype_3
GO Biological Processes	19	GO:0071773	cellular response to BMP stimulus	-2.58042	6.97802	4.55081	22539	170	76	4	5.26316	2.56139	3397|4091|10140|51176	ID1|SMAD6|TOB1|LEF1	-1.24995	Subtype_3
GO Biological Processes	19	GO:0030323	respiratory tube development	-2.57124	6.93721	4.53312	22539	171	76	4	5.26316	2.56139	2034|3397|4781|23414	EPAS1|ID1|NFIB|ZFPM2	-1.24361	Subtype_3
Reactome Gene Sets	6	R-HSA-195253	Degradation of beta-catenin by the destruction complex	-2.56943	10.85	5.19752	22539	82	76	3	3.94737	2.23358	7089|51176|83439	TLE2|LEF1|TCF7L1	-1.24359	Subtype_3
GO Biological Processes	19	GO:0045445	myoblast differentiation	-2.56943	10.85	5.19752	22539	82	76	3	3.94737	2.23358	694|2034|6926	BTG1|EPAS1|TBX3	-1.24359	Subtype_3
GO Biological Processes	19	GO:0045833	negative regulation of lipid metabolic process	-2.56943	10.85	5.19752	22539	82	76	3	3.94737	2.23358	6591|9971|57761	SNAI2|NR1H4|TRIB3	-1.24359	Subtype_3
GO Biological Processes	19	GO:0016569	covalent chromatin modification	-2.56532	3.72704	3.79067	22539	557	76	7	9.21053	3.31706	2146|5931|6591|9971|10891|51176|51547	EZH2|RBBP7|SNAI2|NR1H4|PPARGC1A|LEF1|SIRT7	-1.24231	Subtype_3
GO Biological Processes	19	GO:1903708	positive regulation of hemopoiesis	-2.56212	6.89688	4.51558	22539	172	76	4	5.26316	2.56139	3148|6774|7704|51176	HMGB2|STAT3|ZBTB16|LEF1	-1.23994	Subtype_3
GO Biological Processes	19	GO:0019319	hexose biosynthetic process	-2.55449	10.7192	5.15984	22539	83	76	3	3.94737	2.23358	468|2023|10891	ATF4|ENO1|PPARGC1A	-1.23459	Subtype_3
GO Biological Processes	19	GO:0021953	central nervous system neuron differentiation	-2.55306	6.85701	4.49817	22539	173	76	4	5.26316	2.56139	4781|6095|6659|51176	NFIB|RORA|SOX4|LEF1	-1.23361	Subtype_3
GO Biological Processes	19	GO:0006109	regulation of carbohydrate metabolic process	-2.54405	6.8176	4.4809	22539	174	76	4	5.26316	2.56139	6095|6097|6774|10891	RORA|RORC|STAT3|PPARGC1A	-1.22615	Subtype_3
GO Biological Processes	19	GO:0043414	macromolecule methylation	-2.54378	5.16665	4.13213	22539	287	76	5	6.57895	2.84377	142|694|2146|6628|9971	PARP1|BTG1|EZH2|SNRPB|NR1H4	-1.22615	Subtype_3
KEGG Pathway	24	hsa04350	TGF-beta signaling pathway	-2.53974	10.5916	5.12279	22539	84	76	3	3.94737	2.23358	3397|4091|7027	ID1|SMAD6|TFDP1	-1.22391	Subtype_3
GO Biological Processes	19	GO:0006479	protein methylation	-2.53511	6.77865	4.46376	22539	175	76	4	5.26316	2.56139	694|2146|6628|9971	BTG1|EZH2|SNRPB|NR1H4	-1.22063	Subtype_3
GO Biological Processes	19	GO:0008213	protein alkylation	-2.53511	6.77865	4.46376	22539	175	76	4	5.26316	2.56139	694|2146|6628|9971	BTG1|EZH2|SNRPB|NR1H4	-1.22063	Subtype_3
GO Biological Processes	19	GO:1900407	regulation of cellular response to oxidative stress	-2.52518	10.467	5.08636	22539	85	76	3	3.94737	2.23358	142|468|25793	PARP1|ATF4|FBXO7	-1.21396	Subtype_3
Reactome Gene Sets	6	R-HSA-69002	DNA Replication Pre-Initiation	-2.52518	10.467	5.08636	22539	85	76	3	3.94737	2.23358	1871|4171|4173	E2F3|MCM2|MCM4	-1.21396	Subtype_3
Reactome Gene Sets	6	R-HSA-68874	M/G1 Transition	-2.52518	10.467	5.08636	22539	85	76	3	3.94737	2.23358	1871|4171|4173	E2F3|MCM2|MCM4	-1.21396	Subtype_3
Reactome Gene Sets	6	R-HSA-9006925	Intracellular signaling by second messengers	-2.52442	5.1132	4.10067	22539	290	76	5	6.57895	2.84377	2099|2146|5931|6591|57761	ESR1|EZH2|RBBP7|SNAI2|TRIB3	-1.21396	Subtype_3
GO Biological Processes	19	GO:0072330	monocarboxylic acid biosynthetic process	-2.52442	5.1132	4.10067	22539	290	76	5	6.57895	2.84377	2023|6774|9971|10891|57761	ENO1|STAT3|NR1H4|PPARGC1A|TRIB3	-1.21396	Subtype_3
GO Biological Processes	19	GO:0009156	ribonucleoside monophosphate biosynthetic process	-2.51739	6.70205	4.42989	22539	177	76	4	5.26316	2.56139	142|2023|6774|10891	PARP1|ENO1|STAT3|PPARGC1A	-1.20737	Subtype_3
GO Biological Processes	19	GO:0034728	nucleosome organization	-2.50862	6.6644	4.41315	22539	178	76	4	5.26316	2.56139	3148|3159|4171|5931	HMGB2|HMGA1|MCM2|RBBP7	-1.2017	Subtype_3
GO Biological Processes	19	GO:0045981	positive regulation of nucleotide metabolic process	-2.49661	10.2264	5.01528	22539	87	76	3	3.94737	2.23358	2023|6774|10891	ENO1|STAT3|PPARGC1A	-1.19233	Subtype_3
GO Biological Processes	19	GO:1900544	positive regulation of purine nucleotide metabolic process	-2.49661	10.2264	5.01528	22539	87	76	3	3.94737	2.23358	2023|6774|10891	ENO1|STAT3|PPARGC1A	-1.19233	Subtype_3
KEGG Pathway	24	hsa05202	Transcriptional misregulation in cancer	-2.49123	6.59035	4.38006	22539	180	76	4	5.26316	2.56139	1051|4094|7704|9915	CEBPB|MAF|ZBTB16|ARNT2	-1.18914	Subtype_3
GO Biological Processes	19	GO:0007568	aging	-2.48641	5.00956	4.03902	22539	296	76	5	6.57895	2.84377	2305|3159|6774|6926|10891	FOXM1|HMGA1|STAT3|TBX3|PPARGC1A	-1.18562	Subtype_3
GO Biological Processes	19	GO:0045639	positive regulation of myeloid cell differentiation	-2.48259	10.1102	4.9806	22539	88	76	3	3.94737	2.23358	3148|6774|51176	HMGB2|STAT3|LEF1	-1.18267	Subtype_3
GO Biological Processes	19	GO:0007005	mitochondrion organization	-2.48066	3.59785	3.67703	22539	577	76	7	9.21053	3.31706	142|2034|6774|7027|10891|23408|25793	PARP1|EPAS1|STAT3|TFDP1|PPARGC1A|SIRT5|FBXO7	-1.18117	Subtype_3
Canonical Pathways	11	M5493	WNT SIGNALING	-2.46874	9.9966	4.94648	22539	89	76	3	3.94737	2.23358	7089|51176|83439	TLE2|LEF1|TCF7L1	-1.17485	Subtype_3
GO Biological Processes	19	GO:0046364	monosaccharide biosynthetic process	-2.46874	9.9966	4.94648	22539	89	76	3	3.94737	2.23358	468|2023|10891	ATF4|ENO1|PPARGC1A	-1.17485	Subtype_3
KEGG Pathway	24	hsa05206	MicroRNAs in cancer	-2.46774	4.95929	4.00882	22539	299	76	5	6.57895	2.84377	1871|2146|6659|6774|23414	E2F3|EZH2|SOX4|STAT3|ZFPM2	-1.17471	Subtype_3
GO Biological Processes	19	GO:0009749	response to glucose	-2.46557	6.48231	4.33135	22539	183	76	4	5.26316	2.56139	6659|8431|9971|10891	SOX4|NR0B2|NR1H4|PPARGC1A	-1.17296	Subtype_3
GO Biological Processes	19	GO:0051216	cartilage development	-2.45712	6.44708	4.31535	22539	184	76	4	5.26316	2.56139	4094|4781|6591|7704	MAF|NFIB|SNAI2|ZBTB16	-1.16621	Subtype_3
GO Biological Processes	19	GO:0006694	steroid biosynthetic process	-2.45712	6.44708	4.31535	22539	184	76	4	5.26316	2.56139	6591|9971|10891|23541	SNAI2|NR1H4|PPARGC1A|SEC14L2	-1.16621	Subtype_3
GO Biological Processes	19	GO:0009798	axis specification	-2.45507	9.88553	4.91288	22539	90	76	3	3.94737	2.23358	2114|4091|6926	ETS2|SMAD6|TBX3	-1.16501	Subtype_3
GO Biological Processes	19	GO:0060021	roof of mouth development	-2.45507	9.88553	4.91288	22539	90	76	3	3.94737	2.23358	6591|6926|51176	SNAI2|TBX3|LEF1	-1.16501	Subtype_3
Reactome Gene Sets	6	R-HSA-201722	Formation of the beta-catenin:TCF transactivating complex	-2.44155	9.77689	4.87981	22539	91	76	3	3.94737	2.23358	7089|51176|83439	TLE2|LEF1|TCF7L1	-1.15361	Subtype_3
GO Biological Processes	19	GO:0050679	positive regulation of epithelial cell proliferation	-2.44038	6.37776	4.28371	22539	186	76	4	5.26316	2.56139	367|3148|3397|6774	AR|HMGB2|ID1|STAT3	-1.15286	Subtype_3
GO Biological Processes	19	GO:0009124	nucleoside monophosphate biosynthetic process	-2.43208	6.34365	4.26807	22539	187	76	4	5.26316	2.56139	142|2023|6774|10891	PARP1|ENO1|STAT3|PPARGC1A	-1.14643	Subtype_3
GO Biological Processes	19	GO:0036473	cell death in response to oxidative stress	-2.4282	9.67062	4.84725	22539	92	76	3	3.94737	2.23358	142|468|25793	PARP1|ATF4|FBXO7	-1.14441	Subtype_3
GO Biological Processes	19	GO:0090277	positive regulation of peptide hormone secretion	-2.4282	9.67062	4.84725	22539	92	76	3	3.94737	2.23358	6659|8431|9971	SOX4|NR0B2|NR1H4	-1.14441	Subtype_3
GO Biological Processes	19	GO:0009746	response to hexose	-2.42384	6.30991	4.25254	22539	188	76	4	5.26316	2.56139	6659|8431|9971|10891	SOX4|NR0B2|NR1H4|PPARGC1A	-1.14051	Subtype_3
GO Biological Processes	19	GO:0006473	protein acetylation	-2.41564	6.27652	4.23712	22539	189	76	4	5.26316	2.56139	6591|6659|10891|51176	SNAI2|SOX4|PPARGC1A|LEF1	-1.13523	Subtype_3
GO Biological Processes	19	GO:0090317	negative regulation of intracellular protein transport	-2.415	9.56664	4.81519	22539	93	76	3	3.94737	2.23358	580|6591|6659	BARD1|SNAI2|SOX4	-1.13501	Subtype_3
GO Biological Processes	19	GO:0071216	cellular response to biotic stimulus	-2.4075	6.24349	4.22181	22539	190	76	4	5.26316	2.56139	1051|3148|9971|10891	CEBPB|HMGB2|NR1H4|PPARGC1A	-1.12998	Subtype_3
GO Biological Processes	19	GO:0002573	myeloid leukocyte differentiation	-2.4075	6.24349	4.22181	22539	190	76	4	5.26316	2.56139	142|1051|9935|51176	PARP1|CEBPB|MAFB|LEF1	-1.12998	Subtype_3
GO Biological Processes	19	GO:0021549	cerebellum development	-2.40196	9.46487	4.7836	22539	94	76	3	3.94737	2.23358	2146|6095|10891	EZH2|RORA|PPARGC1A	-1.12691	Subtype_3
GO Biological Processes	19	GO:0035282	segmentation	-2.40196	9.46487	4.7836	22539	94	76	3	3.94737	2.23358	6926|9935|51176	TBX3|MAFB|LEF1	-1.12691	Subtype_3
GO Biological Processes	19	GO:0006333	chromatin assembly or disassembly	-2.39135	6.17845	4.19152	22539	192	76	4	5.26316	2.56139	3148|3159|4171|5931	HMGB2|HMGA1|MCM2|RBBP7	-1.11916	Subtype_3
GO Biological Processes	19	GO:1900542	regulation of purine nucleotide metabolic process	-2.39135	6.17845	4.19152	22539	192	76	4	5.26316	2.56139	142|2023|6774|10891	PARP1|ENO1|STAT3|PPARGC1A	-1.11916	Subtype_3
GO Biological Processes	19	GO:1902882	regulation of response to oxidative stress	-2.38907	9.36524	4.75248	22539	95	76	3	3.94737	2.23358	142|468|25793	PARP1|ATF4|FBXO7	-1.1189	Subtype_3
GO Biological Processes	19	GO:0043502	regulation of muscle adaptation	-2.38907	9.36524	4.75248	22539	95	76	3	3.94737	2.23358	142|9569|10891	PARP1|GTF2IRD1|PPARGC1A	-1.1189	Subtype_3
GO Biological Processes	19	GO:0060070	canonical Wnt signaling pathway	-2.38349	4.73747	3.87302	22539	313	76	5	6.57895	2.84377	6591|6659|7089|51176|83439	SNAI2|SOX4|TLE2|LEF1|TCF7L1	-1.11441	Subtype_3
GO Biological Processes	19	GO:0034284	response to monosaccharide	-2.38335	6.14644	4.17654	22539	193	76	4	5.26316	2.56139	6659|8431|9971|10891	SOX4|NR0B2|NR1H4|PPARGC1A	-1.11441	Subtype_3
GO Biological Processes	19	GO:0010906	regulation of glucose metabolic process	-2.37632	9.26768	4.72182	22539	96	76	3	3.94737	2.23358	6095|6097|10891	RORA|RORC|PPARGC1A	-1.10967	Subtype_3
GO Biological Processes	19	GO:0008585	female gonad development	-2.37632	9.26768	4.72182	22539	96	76	3	3.94737	2.23358	1051|2099|23414	CEBPB|ESR1|ZFPM2	-1.10967	Subtype_3
GO Biological Processes	19	GO:0010001	glial cell differentiation	-2.3754	6.11476	4.16166	22539	194	76	4	5.26316	2.56139	4781|6659|6774|51176	NFIB|SOX4|STAT3|LEF1	-1.10967	Subtype_3
GO Biological Processes	19	GO:0043523	regulation of neuron apoptotic process	-2.3754	6.11476	4.16166	22539	194	76	4	5.26316	2.56139	142|468|1051|10891	PARP1|ATF4|CEBPB|PPARGC1A	-1.10967	Subtype_3
GO Biological Processes	19	GO:0060562	epithelial tube morphogenesis	-2.36602	4.6925	3.84497	22539	316	76	5	6.57895	2.84377	367|2099|6659|6926|51176	AR|ESR1|SOX4|TBX3|LEF1	-1.10149	Subtype_3
GO Biological Processes	19	GO:0001655	urogenital system development	-2.36024	4.67769	3.8357	22539	317	76	5	6.57895	2.84377	367|2099|4091|6659|7704	AR|ESR1|SMAD6|SOX4|ZBTB16	-1.09811	Subtype_3
GO Biological Processes	19	GO:0045936	negative regulation of phosphate metabolic process	-2.35663	3.41441	3.51046	22539	608	76	7	9.21053	3.31706	142|2305|4091|6774|10891|25793|57761	PARP1|FOXM1|SMAD6|STAT3|PPARGC1A|FBXO7|TRIB3	-1.09529	Subtype_3
GO Biological Processes	19	GO:0010563	negative regulation of phosphorus metabolic process	-2.35276	3.4088	3.50527	22539	609	76	7	9.21053	3.31706	142|2305|4091|6774|10891|25793|57761	PARP1|FOXM1|SMAD6|STAT3|PPARGC1A|FBXO7|TRIB3	-1.09222	Subtype_3
GO Biological Processes	19	GO:0071456	cellular response to hypoxia	-2.34405	5.99123	4.10317	22539	198	76	4	5.26316	2.56139	2023|2034|6095|10891	ENO1|EPAS1|RORA|PPARGC1A	-1.08509	Subtype_3
GO Biological Processes	19	GO:0006476	protein deacetylation	-2.33894	8.98684	4.63246	22539	99	76	3	3.94737	2.23358	5931|23408|51547	RBBP7|SIRT5|SIRT7	-1.08195	Subtype_3
GO Biological Processes	19	GO:0006096	glycolytic process	-2.33894	8.98684	4.63246	22539	99	76	3	3.94737	2.23358	2023|6774|10891	ENO1|STAT3|PPARGC1A	-1.08195	Subtype_3
GO Biological Processes	19	GO:0006140	regulation of nucleotide metabolic process	-2.33633	5.96112	4.0888	22539	199	76	4	5.26316	2.56139	142|2023|6774|10891	PARP1|ENO1|STAT3|PPARGC1A	-1.07973	Subtype_3
GO Biological Processes	19	GO:0006757	ATP generation from ADP	-2.32676	8.89697	4.60351	22539	100	76	3	3.94737	2.23358	2023|6774|10891	ENO1|STAT3|PPARGC1A	-1.07219	Subtype_3
GO Biological Processes	19	GO:0046545	development of primary female sexual characteristics	-2.3147	8.80888	4.57497	22539	101	76	3	3.94737	2.23358	1051|2099|23414	CEBPB|ESR1|ZFPM2	-1.06356	Subtype_3
GO Biological Processes	19	GO:0009952	anterior/posterior pattern specification	-2.31342	5.87259	4.04626	22539	202	76	4	5.26316	2.56139	2114|6926|7704|51176	ETS2|TBX3|ZBTB16|LEF1	-1.06267	Subtype_3
GO Biological Processes	19	GO:0021761	limbic system development	-2.30278	8.72252	4.54682	22539	102	76	3	3.94737	2.23358	2146|6926|51176	EZH2|TBX3|LEF1	-1.05435	Subtype_3
Reactome Gene Sets	6	R-HSA-9006936	Signaling by TGF-beta family members	-2.30278	8.72252	4.54682	22539	102	76	3	3.94737	2.23358	142|4091|7027	PARP1|SMAD6|TFDP1	-1.05435	Subtype_3
GO Biological Processes	19	GO:0022037	metencephalon development	-2.29099	8.63784	4.51905	22539	103	76	3	3.94737	2.23358	2146|6095|10891	EZH2|RORA|PPARGC1A	-1.04435	Subtype_3
GO Biological Processes	19	GO:0042866	pyruvate biosynthetic process	-2.29099	8.63784	4.51905	22539	103	76	3	3.94737	2.23358	2023|6774|10891	ENO1|STAT3|PPARGC1A	-1.04435	Subtype_3
GO Biological Processes	19	GO:2001237	negative regulation of extrinsic apoptotic signaling pathway	-2.29099	8.63784	4.51905	22539	103	76	3	3.94737	2.23358	367|3148|6591	AR|HMGB2|SNAI2	-1.04435	Subtype_3
GO Biological Processes	19	GO:0036294	cellular response to decreased oxygen levels	-2.2909	5.78665	4.00457	22539	205	76	4	5.26316	2.56139	2023|2034|6095|10891	ENO1|EPAS1|RORA|PPARGC1A	-1.04435	Subtype_3
GO Biological Processes	19	GO:0042326	negative regulation of phosphorylation	-2.28458	3.7699	3.53749	22539	472	76	6	7.89474	3.09317	2305|4091|6774|10891|25793|57761	FOXM1|SMAD6|STAT3|PPARGC1A|FBXO7|TRIB3	-1.0396	Subtype_3
GO Biological Processes	19	GO:0016567	protein ubiquitination	-2.27508	2.98056	3.30914	22539	796	76	8	10.5263	3.5203	580|2034|6659|7704|11074|25793|57761|140462	BARD1|EPAS1|SOX4|ZBTB16|TRIM31|FBXO7|TRIB3|ASB9	-1.03265	Subtype_3
GO Biological Processes	19	GO:0007178	transmembrane receptor protein serine/threonine kinase signaling pathway	-2.27065	4.45294	3.69238	22539	333	76	5	6.57895	2.84377	142|3397|4091|10140|51176	PARP1|ID1|SMAD6|TOB1|LEF1	-1.0291	Subtype_3
GO Biological Processes	19	GO:0046031	ADP metabolic process	-2.26777	8.47331	4.46462	22539	105	76	3	3.94737	2.23358	2023|6774|10891	ENO1|STAT3|PPARGC1A	-1.02698	Subtype_3
GO Biological Processes	19	GO:0006323	DNA packaging	-2.25421	5.64887	3.93689	22539	210	76	4	5.26316	2.56139	3148|3159|4171|5931	HMGB2|HMGA1|MCM2|RBBP7	-1.01455	Subtype_3
GO Biological Processes	19	GO:0016049	cell growth	-2.2497	3.70707	3.48705	22539	480	76	6	7.89474	3.09317	367|694|2023|5931|6595|51176	AR|BTG1|ENO1|RBBP7|SMARCA2|LEF1	-1.01155	Subtype_3
GO Biological Processes	19	GO:2001234	negative regulation of apoptotic signaling pathway	-2.24699	5.6221	3.92361	22539	211	76	4	5.26316	2.56139	367|2023|3148|6591	AR|ENO1|HMGB2|SNAI2	-1.00921	Subtype_3
KEGG Pathway	24	hsa04659	Th17 cell differentiation	-2.24503	8.31493	4.41163	22539	107	76	3	3.94737	2.23358	6095|6097|6774	RORA|RORC|STAT3	-1.00839	Subtype_3
KEGG Pathway	24	hsa04931	Insulin resistance	-2.24503	8.31493	4.41163	22539	107	76	3	3.94737	2.23358	6774|10891|57761	STAT3|PPARGC1A|TRIB3	-1.00839	Subtype_3
GO Biological Processes	19	GO:0048729	tissue morphogenesis	-2.24419	3.25386	3.3592	22539	638	76	7	9.21053	3.31706	367|2099|6591|6659|6926|23414|51176	AR|ESR1|SNAI2|SOX4|TBX3|ZFPM2|LEF1	-1.00792	Subtype_3
Reactome Gene Sets	6	R-HSA-69306	DNA Replication	-2.23384	8.23794	4.38564	22539	108	76	3	3.94737	2.23358	1871|4171|4173	E2F3|MCM2|MCM4	-0.999438	Subtype_3
Reactome Gene Sets	6	R-HSA-6785807	Interleukin-4 and 13 signaling	-2.23384	8.23794	4.38564	22539	108	76	3	3.94737	2.23358	6095|6097|6774	RORA|RORC|STAT3	-0.999438	Subtype_3
GO Biological Processes	19	GO:1901652	response to peptide	-2.23254	3.67644	3.46223	22539	484	76	6	7.89474	3.09317	142|694|3397|6774|9971|57761	PARP1|BTG1|ID1|STAT3|NR1H4|TRIB3	-0.998505	Subtype_3
GO Biological Processes	19	GO:0006302	double-strand break repair	-2.22557	5.54329	3.88429	22539	214	76	4	5.26316	2.56139	142|580|2305|9319	PARP1|BARD1|FOXM1|TRIP13	-0.994139	Subtype_3
GO Biological Processes	19	GO:0009743	response to carbohydrate	-2.22557	5.54329	3.88429	22539	214	76	4	5.26316	2.56139	6659|8431|9971|10891	SOX4|NR0B2|NR1H4|PPARGC1A	-0.994139	Subtype_3
GO Biological Processes	19	GO:0051054	positive regulation of DNA metabolic process	-2.22557	5.54329	3.88429	22539	214	76	4	5.26316	2.56139	142|2305|10891|79733	PARP1|FOXM1|PPARGC1A|E2F8	-0.994139	Subtype_3
GO Biological Processes	19	GO:0035601	protein deacylation	-2.22276	8.16236	4.35999	22539	109	76	3	3.94737	2.23358	5931|23408|51547	RBBP7|SIRT5|SIRT7	-0.992444	Subtype_3
GO Biological Processes	19	GO:0007569	cell aging	-2.22276	8.16236	4.35999	22539	109	76	3	3.94737	2.23358	2305|3159|6926	FOXM1|HMGA1|TBX3	-0.992444	Subtype_3
Reactome Gene Sets	6	R-HSA-8878159	Transcriptional regulation by RUNX3	-2.22276	8.16236	4.35999	22539	109	76	3	3.94737	2.23358	6097|51176|83439	RORC|LEF1|TCF7L1	-0.992444	Subtype_3
GO Biological Processes	19	GO:0051224	negative regulation of protein transport	-2.21851	5.5175	3.87135	22539	215	76	4	5.26316	2.56139	580|6591|6659|9971	BARD1|SNAI2|SOX4|NR1H4	-0.98915	Subtype_3
GO Biological Processes	19	GO:0010639	negative regulation of organelle organization	-2.21726	4.32312	3.60733	22539	343	76	5	6.57895	2.84377	142|3159|9232|9319|10891	PARP1|HMGA1|PTTG1|TRIP13|PPARGC1A	-0.98915	Subtype_3
GO Biological Processes	19	GO:0098732	macromolecule deacylation	-2.2118	8.08816	4.33466	22539	110	76	3	3.94737	2.23358	5931|23408|51547	RBBP7|SIRT5|SIRT7	-0.984959	Subtype_3
GO Biological Processes	19	GO:0046822	regulation of nucleocytoplasmic transport	-2.21148	5.49196	3.85849	22539	216	76	4	5.26316	2.56139	142|580|6591|6659	PARP1|BARD1|SNAI2|SOX4	-0.984959	Subtype_3
GO Biological Processes	19	GO:0048871	multicellular organismal homeostasis	-2.20681	4.29805	3.59071	22539	345	76	5	6.57895	2.84377	580|2034|6774|9079|10891	BARD1|EPAS1|STAT3|LDB2|PPARGC1A	-0.982408	Subtype_3
GO Biological Processes	19	GO:0001666	response to hypoxia	-2.20681	4.29805	3.59071	22539	345	76	5	6.57895	2.84377	2023|2034|6095|9915|10891	ENO1|EPAS1|RORA|ARNT2|PPARGC1A	-0.982408	Subtype_3
GO Biological Processes	19	GO:0002065	columnar/cuboidal epithelial cell differentiation	-2.20094	8.01529	4.30966	22539	111	76	3	3.94737	2.23358	1051|6659|51176	CEBPB|SOX4|LEF1	-0.977949	Subtype_3
GO Biological Processes	19	GO:0042593	glucose homeostasis	-2.19754	5.44157	3.833	22539	218	76	4	5.26316	2.56139	6659|6774|9971|10891	SOX4|STAT3|NR1H4|PPARGC1A	-0.976007	Subtype_3
GO Biological Processes	19	GO:0033500	carbohydrate homeostasis	-2.19754	5.44157	3.833	22539	218	76	4	5.26316	2.56139	6659|6774|9971|10891	SOX4|STAT3|NR1H4|PPARGC1A	-0.976007	Subtype_3
GO Biological Processes	19	GO:0051098	regulation of binding	-2.19643	4.27328	3.57421	22539	347	76	5	6.57895	2.84377	142|3148|3397|51176|57761	PARP1|HMGB2|ID1|LEF1|TRIB3	-0.975254	Subtype_3
GO Biological Processes	19	GO:1901615	organic hydroxy compound metabolic process	-2.19457	3.60932	3.40735	22539	493	76	6	7.89474	3.09317	2034|2494|6591|8431|9971|23541	EPAS1|NR5A2|SNAI2|NR0B2|NR1H4|SEC14L2	-0.974837	Subtype_3
GO Biological Processes	19	GO:0032259	methylation	-2.19127	4.261	3.56601	22539	348	76	5	6.57895	2.84377	142|694|2146|6628|9971	PARP1|BTG1|EZH2|SNRPB|NR1H4	-0.972257	Subtype_3
GO Biological Processes	19	GO:1904950	negative regulation of establishment of protein localization	-2.19063	5.41673	3.82038	22539	219	76	4	5.26316	2.56139	580|6591|6659|9971	BARD1|SNAI2|SOX4|NR1H4	-0.972257	Subtype_3
GO Biological Processes	19	GO:0051402	neuron apoptotic process	-2.19063	5.41673	3.82038	22539	219	76	4	5.26316	2.56139	142|468|1051|10891	PARP1|ATF4|CEBPB|PPARGC1A	-0.972257	Subtype_3
GO Biological Processes	19	GO:0002761	regulation of myeloid leukocyte differentiation	-2.19019	7.94373	4.28496	22539	112	76	3	3.94737	2.23358	1051|9935|51176	CEBPB|MAFB|LEF1	-0.972257	Subtype_3
GO Biological Processes	19	GO:0043618	regulation of transcription from RNA polymerase II promoter in response to stress	-2.19019	7.94373	4.28496	22539	112	76	3	3.94737	2.23358	468|1051|2034	ATF4|CEBPB|EPAS1	-0.972257	Subtype_3
GO Biological Processes	19	GO:1901653	cellular response to peptide	-2.18612	4.24879	3.55784	22539	349	76	5	6.57895	2.84377	142|3397|6774|9971|57761	PARP1|ID1|STAT3|NR1H4|TRIB3	-0.968912	Subtype_3
GO Biological Processes	19	GO:0016055	Wnt signaling pathway	-2.18211	3.58749	3.38934	22539	496	76	6	7.89474	3.09317	2099|6591|6659|7089|51176|83439	ESR1|SNAI2|SOX4|TLE2|LEF1|TCF7L1	-0.965611	Subtype_3
GO Biological Processes	19	GO:0071453	cellular response to oxygen levels	-2.17691	5.36771	3.79536	22539	221	76	4	5.26316	2.56139	2023|2034|6095|10891	ENO1|EPAS1|RORA|PPARGC1A	-0.960777	Subtype_3
GO Biological Processes	19	GO:0198738	cell-cell signaling by wnt	-2.17385	3.57308	3.37741	22539	498	76	6	7.89474	3.09317	2099|6591|6659|7089|51176|83439	ESR1|SNAI2|SOX4|TLE2|LEF1|TCF7L1	-0.959144	Subtype_3
GO Biological Processes	19	GO:0032387	negative regulation of intracellular transport	-2.169	7.80436	4.23647	22539	114	76	3	3.94737	2.23358	580|6591|6659	BARD1|SNAI2|SOX4	-0.954649	Subtype_3
GO Biological Processes	19	GO:0036293	response to decreased oxygen levels	-2.16573	4.20065	3.52547	22539	353	76	5	6.57895	2.84377	2023|2034|6095|9915|10891	ENO1|EPAS1|RORA|ARNT2|PPARGC1A	-0.951733	Subtype_3
GO Biological Processes	19	GO:0080135	regulation of cellular response to stress	-2.15569	3.13116	3.23981	22539	663	76	7	9.21053	3.31706	142|468|2023|2305|3159|6591|25793	PARP1|ATF4|ENO1|FOXM1|HMGA1|SNAI2|FBXO7	-0.94437	Subtype_3
GO Biological Processes	19	GO:0034248	regulation of cellular amide metabolic process	-2.15569	3.13116	3.23981	22539	663	76	7	9.21053	3.31706	468|2099|6659|6774|9971|10140|57472	ATF4|ESR1|SOX4|STAT3|NR1H4|TOB1|CNOT6	-0.94437	Subtype_3
GO Biological Processes	19	GO:0071363	cellular response to growth factor stimulus	-2.14194	3.11238	3.22123	22539	667	76	7	9.21053	3.31706	142|3397|4091|6591|10140|10891|51176	PARP1|ID1|SMAD6|SNAI2|TOB1|PPARGC1A|LEF1	-0.933952	Subtype_3
GO Biological Processes	19	GO:0007276	gamete generation	-2.13852	3.10773	3.21661	22539	668	76	7	9.21053	3.31706	367|694|3148|6595|7704|9232|9319	AR|BTG1|HMGB2|SMARCA2|ZBTB16|PTTG1|TRIP13	-0.931463	Subtype_3
GO Biological Processes	19	GO:0006165	nucleoside diphosphate phosphorylation	-2.13798	7.60425	4.16591	22539	117	76	3	3.94737	2.23358	2023|6774|10891	ENO1|STAT3|PPARGC1A	-0.931463	Subtype_3
GO Biological Processes	19	GO:0055088	lipid homeostasis	-2.13798	7.60425	4.16591	22539	117	76	3	3.94737	2.23358	2494|6095|9971	NR5A2|RORA|NR1H4	-0.931463	Subtype_3
GO Biological Processes	19	GO:0010817	regulation of hormone levels	-2.13723	3.50965	3.32446	22539	507	76	6	7.89474	3.09317	2099|6659|6926|8431|9971|10891	ESR1|SOX4|TBX3|NR0B2|NR1H4|PPARGC1A	-0.931463	Subtype_3
GO Biological Processes	19	GO:0043620	regulation of DNA-templated transcription in response to stress	-2.12784	7.53981	4.14294	22539	118	76	3	3.94737	2.23358	468|1051|2034	ATF4|CEBPB|EPAS1	-0.923697	Subtype_3
GO Biological Processes	19	GO:0043543	protein acylation	-2.12346	5.18019	3.69823	22539	229	76	4	5.26316	2.56139	6591|6659|10891|51176	SNAI2|SOX4|PPARGC1A|LEF1	-0.91967	Subtype_3
GO Biological Processes	19	GO:0071560	cellular response to transforming growth factor beta stimulus	-2.11694	5.15767	3.68641	22539	230	76	4	5.26316	2.56139	142|3397|4091|10891	PARP1|ID1|SMAD6|PPARGC1A	-0.914184	Subtype_3
GO Biological Processes	19	GO:0042180	cellular ketone metabolic process	-2.11694	5.15767	3.68641	22539	230	76	4	5.26316	2.56139	9971|10891|23408|57761	NR1H4|PPARGC1A|SIRT5|TRIB3	-0.914184	Subtype_3
GO Biological Processes	19	GO:0032846	positive regulation of homeostatic process	-2.11694	5.15767	3.68641	22539	230	76	4	5.26316	2.56139	3148|6774|9971|10891	HMGB2|STAT3|NR1H4|PPARGC1A	-0.914184	Subtype_3
GO Biological Processes	19	GO:0042692	muscle cell differentiation	-2.11596	4.08493	3.44657	22539	363	76	5	6.57895	2.84377	2146|2274|6095|6926|51176	EZH2|FHL2|RORA|TBX3|LEF1	-0.913551	Subtype_3
GO Biological Processes	19	GO:0071333	cellular response to glucose stimulus	-2.10783	7.41414	4.09781	22539	120	76	3	3.94737	2.23358	6659|9971|10891	SOX4|NR1H4|PPARGC1A	-0.908193	Subtype_3
GO Biological Processes	19	GO:0009135	purine nucleoside diphosphate metabolic process	-2.09797	7.35287	4.07563	22539	121	76	3	3.94737	2.23358	2023|6774|10891	ENO1|STAT3|PPARGC1A	-0.900998	Subtype_3
GO Biological Processes	19	GO:0009179	purine ribonucleoside diphosphate metabolic process	-2.09797	7.35287	4.07563	22539	121	76	3	3.94737	2.23358	2023|6774|10891	ENO1|STAT3|PPARGC1A	-0.900998	Subtype_3
Reactome Gene Sets	6	R-HSA-201681	TCF dependent signaling in response to WNT	-2.09755	5.09126	3.65136	22539	233	76	4	5.26316	2.56139	6659|7089|51176|83439	SOX4|TLE2|LEF1|TCF7L1	-0.900998	Subtype_3
GO Biological Processes	19	GO:0045926	negative regulation of growth	-2.09755	5.09126	3.65136	22539	233	76	4	5.26316	2.56139	694|2023|5931|6595	BTG1|ENO1|RBBP7|SMARCA2	-0.900998	Subtype_3
GO Biological Processes	19	GO:0030900	forebrain development	-2.09652	4.04041	3.4158	22539	367	76	5	6.57895	2.84377	2146|4781|6926|10891|51176	EZH2|NFIB|TBX3|PPARGC1A|LEF1	-0.900307	Subtype_3
GO Biological Processes	19	GO:0071559	response to transforming growth factor beta	-2.09115	5.0695	3.63981	22539	234	76	4	5.26316	2.56139	142|3397|4091|10891	PARP1|ID1|SMAD6|PPARGC1A	-0.896989	Subtype_3
Reactome Gene Sets	6	R-HSA-3700989	Transcriptional Regulation by TP53	-2.0869	4.01851	3.40058	22539	369	76	5	6.57895	2.84377	580|5931|7027|57472|79733	BARD1|RBBP7|TFDP1|CNOT6|E2F8	-0.893731	Subtype_3
GO Biological Processes	19	GO:0046939	nucleotide phosphorylation	-2.07851	7.23331	4.03202	22539	123	76	3	3.94737	2.23358	2023|6774|10891	ENO1|STAT3|PPARGC1A	-0.88706	Subtype_3
GO Biological Processes	19	GO:0009185	ribonucleoside diphosphate metabolic process	-2.07851	7.23331	4.03202	22539	123	76	3	3.94737	2.23358	2023|6774|10891	ENO1|STAT3|PPARGC1A	-0.88706	Subtype_3
GO Biological Processes	19	GO:0071331	cellular response to hexose stimulus	-2.07851	7.23331	4.03202	22539	123	76	3	3.94737	2.23358	6659|9971|10891	SOX4|NR1H4|PPARGC1A	-0.88706	Subtype_3
GO Biological Processes	19	GO:0045787	positive regulation of cell cycle	-2.07734	3.99684	3.38547	22539	371	76	5	6.57895	2.84377	6659|6926|7027|57472|79733	SOX4|TBX3|TFDP1|CNOT6|E2F8	-0.88656	Subtype_3
GO Biological Processes	19	GO:0071326	cellular response to monosaccharide stimulus	-2.06892	7.17498	4.01058	22539	124	76	3	3.94737	2.23358	6659|9971|10891	SOX4|NR1H4|PPARGC1A	-0.880159	Subtype_3
GO Biological Processes	19	GO:0070848	response to growth factor	-2.05195	2.9913	3.09935	22539	694	76	7	9.21053	3.31706	142|3397|4091|6591|10140|10891|51176	PARP1|ID1|SMAD6|SNAI2|TOB1|PPARGC1A|LEF1	-0.866103	Subtype_3
GO Biological Processes	19	GO:0046887	positive regulation of hormone secretion	-2.04998	7.06109	3.96841	22539	126	76	3	3.94737	2.23358	6659|8431|9971	SOX4|NR0B2|NR1H4	-0.864568	Subtype_3
GO Biological Processes	19	GO:0070482	response to oxygen levels	-2.04904	3.93323	3.34075	22539	377	76	5	6.57895	2.84377	2023|2034|6095|9915|10891	ENO1|EPAS1|RORA|ARNT2|PPARGC1A	-0.864017	Subtype_3
GO Biological Processes	19	GO:0002009	morphogenesis of an epithelium	-2.04732	3.35735	3.19442	22539	530	76	6	7.89474	3.09317	367|2099|6591|6659|6926|51176	AR|ESR1|SNAI2|SOX4|TBX3|LEF1	-0.863243	Subtype_3
GO Biological Processes	19	GO:0090257	regulation of muscle system process	-2.04111	4.90191	3.54971	22539	242	76	4	5.26316	2.56139	142|2023|9569|10891	PARP1|ENO1|GTF2IRD1|PPARGC1A	-0.857696	Subtype_3
GO Biological Processes	19	GO:0051091	positive regulation of DNA binding transcription factor activity	-2.03499	4.88174	3.53873	22539	243	76	4	5.26316	2.56139	367|2099|10891|11074	AR|ESR1|PPARGC1A|TRIM31	-0.852903	Subtype_3
GO Biological Processes	19	GO:0009896	positive regulation of catabolic process	-2.03049	3.89194	3.31144	22539	381	76	5	6.57895	2.84377	580|10140|25793|57761|140462	BARD1|TOB1|FBXO7|TRIB3|ASB9	-0.848729	Subtype_3
GO Biological Processes	19	GO:0007281	germ cell development	-2.02891	4.86173	3.5278	22539	244	76	4	5.26316	2.56139	3148|6595|7704|9319	HMGB2|SMARCA2|ZBTB16|TRIP13	-0.848668	Subtype_3
GO Biological Processes	19	GO:0043122	regulation of I-kappaB kinase/NF-kappaB signaling	-2.02891	4.86173	3.5278	22539	244	76	4	5.26316	2.56139	2099|6095|9971|54503	ESR1|RORA|NR1H4|ZDHHC13	-0.848668	Subtype_3
Reactome Gene Sets	6	R-HSA-69278	Cell Cycle, Mitotic	-2.0247	3.31977	3.16167	22539	536	76	6	7.89474	3.09317	1871|2305|4171|4173|7027|9232	E2F3|FOXM1|MCM2|MCM4|TFDP1|PTTG1	-0.845902	Subtype_3
Reactome Gene Sets	6	R-HSA-69206	G1/S Transition	-2.02219	6.89688	3.90685	22539	129	76	3	3.94737	2.23358	4171|4173|7027	MCM2|MCM4|TFDP1	-0.843726	Subtype_3
GO Biological Processes	19	GO:0060485	mesenchyme development	-2.01682	4.82221	3.50613	22539	246	76	4	5.26316	2.56139	2146|6591|23414|51176	EZH2|SNAI2|ZFPM2|LEF1	-0.839005	Subtype_3
GO Biological Processes	19	GO:0019363	pyridine nucleotide biosynthetic process	-2.01309	6.84383	3.88677	22539	130	76	3	3.94737	2.23358	2023|6774|10891	ENO1|STAT3|PPARGC1A	-0.836262	Subtype_3
GO Biological Processes	19	GO:0019359	nicotinamide nucleotide biosynthetic process	-2.01309	6.84383	3.88677	22539	130	76	3	3.94737	2.23358	2023|6774|10891	ENO1|STAT3|PPARGC1A	-0.836262	Subtype_3
GO Biological Processes	19	GO:0071322	cellular response to carbohydrate stimulus	-2.00407	6.79158	3.86689	22539	131	76	3	3.94737	2.23358	6659|9971|10891	SOX4|NR1H4|PPARGC1A	-0.828544	Subtype_3
