# Supplementary material for: Discovering master regulators in hepatocellular carcinoma: one novel MR, SEC14L2 inhibits cancer cells
Source: Aging (Albany NY). 2019 Dec 18;11(24):12375–411. doi: 10.18632/aging.102579 (PMC6949064; doi:10.18632/aging.102579)
Supplement: Supplementary Table 5 [file aging-11-102579-s006..xlsx]

## Sheet: HBV_related
Regulon	Universe.Size	Regulon.Size	Total.Hits	Expected.Hits	Observed.Hits	Pvalue	Adjusted.Pvalue
PTTG1	12100	128	483	5.11	63	3.1e-54	2.8e-51
ESR1	12100	137	483	5.47	62	1.7e-50	7.7e-48
SEC14L2	12100	304	483	12.13	84	4e-48	1.2e-45
NR1I2	12100	164	483	6.55	62	1.1e-44	2.5e-42
PPARGC1A	12100	172	483	6.87	57	2e-37	3.7e-35
MAF	12100	115	483	4.59	46	1.4e-34	2.1e-32
NR1I3	12100	140	483	5.59	47	3e-31	4e-29
NR1H4	12100	155	483	6.19	42	7.5e-24	8.6e-22
AR	12100	103	483	4.11	35	1e-23	1e-21
MCM6	12100	59	483	2.36	27	1.2e-22	1.1e-20
TBC1D2B	12100	44	483	1.76	23	3.7e-21	3.1e-19
HLF	12100	113	483	4.51	34	4e-21	3.1e-19
NRF1	12100	57	483	2.28	24	3.4e-19	2.4e-17
TRIM32	12100	98	483	3.91	30	5.2e-19	3.4e-17
NR0B2	12100	172	483	6.87	38	2.5e-18	1.5e-16
HOXB7	12100	32	483	1.28	18	1.4e-17	7.8e-16
LHX2	12100	24	483	0.96	16	1.8e-17	9.6e-16
SALL1	12100	128	483	5.11	30	1.8e-15	9.3e-14
LEF1	12100	73	483	2.91	23	3.6e-15	1.7e-13
HOXA5	12100	16	483	0.64	12	2.3e-14	1e-12
KLF11	12100	43	483	1.72	17	2e-13	8.8e-12
MLXIPL	12100	263	483	10.5	40	2.1e-13	8.8e-12
TEAD4	12100	79	483	3.15	22	2.5e-13	9.9e-12
FOXM1	12100	50	483	2	18	2.7e-13	1e-11
SOX4	12100	152	483	6.07	29	1.5e-12	5.5e-11
SNRPD1	12100	153	483	6.11	29	1.8e-12	6.3e-11
TCEA2	12100	79	483	3.15	21	2.4e-12	8.1e-11
MCM4	12100	31	483	1.24	14	3.1e-12	1e-10
TRIP13	12100	89	483	3.55	22	3.5e-12	1.1e-10
GTF3C2	12100	45	483	1.8	16	7.2e-12	2.2e-10
ZNF189	12100	46	483	1.84	16	1.1e-11	3.2e-10
SPIB	12100	90	483	3.59	21	3.6e-11	1e-09
E2F8	12100	20	483	0.8	11	4.4e-11	1.2e-09
PER1	12100	103	483	4.11	22	7.9e-11	2.1e-09
SUV39H2	12100	21	483	0.84	11	9e-11	2.4e-09
FOS	12100	39	483	1.56	14	1.3e-10	3.3e-09
CBX6	12100	70	483	2.79	18	1.6e-10	4.1e-09
PER3	12100	79	483	3.15	19	1.8e-10	4.3e-09
NAP1L4	12100	35	483	1.4	13	3.7e-10	8.6e-09
EZH2	12100	57	483	2.28	16	4.1e-10	9.5e-09
SS18L1	12100	83	483	3.31	19	4.4e-10	9.9e-09
HEY2	12100	24	483	0.96	11	5.7e-10	1.2e-08
PHF20	12100	47	483	1.88	14	2.2e-09	4.7e-08
FOSB	12100	33	483	1.32	12	2.4e-09	4.9e-08
HMGN4	12100	65	483	2.59	16	3.5e-09	7e-08
ETS2	12100	44	483	1.76	13	9.3e-09	1.9e-07
BRCA2	12100	32	483	1.28	11	2.2e-08	4.2e-07
NR3C2	12100	32	483	1.28	11	2.2e-08	4.2e-07
GATAD2A	12100	40	483	1.6	12	2.9e-08	5.4e-07
EHF	12100	96	483	3.83	18	3.7e-08	6.8e-07
ARID3A	12100	131	483	5.23	21	4.8e-08	8.7e-07
MAFB	12100	59	483	2.36	14	5.5e-08	9.7e-07
PIAS3	12100	70	483	2.79	15	8e-08	1.4e-06
HABP4	12100	136	483	5.43	21	9.4e-08	1.6e-06
TOB1	12100	82	483	3.27	16	1.2e-07	2e-06
NCOR1	12100	47	483	1.88	12	2.1e-07	3.4e-06
NPM1	12100	155	483	6.19	22	2.1e-07	3.5e-06
EGR1	12100	49	483	1.96	12	3.4e-07	5.4e-06
TTF2	12100	27	483	1.08	9	5.9e-07	9.1e-06
PARP1	12100	43	483	1.72	11	6.6e-07	1e-05
CBX3	12100	67	483	2.67	13	2e-06	2.9e-05
TRIM31	12100	17	483	0.68	7	2.1e-06	3.1e-05
ANKS1A	12100	39	483	1.56	10	2.1e-06	3.1e-05
TCF21	12100	24	483	0.96	8	2.5e-06	3.6e-05
NKX3-1	12100	20	483	0.8	7	7.6e-06	0.00011
ELF4	12100	255	483	10.18	26	1.1e-05	0.00015
GTF2IRD1	12100	47	483	1.88	10	1.3e-05	0.00018
TFAP2A	12100	116	483	4.63	16	1.4e-05	0.00019
PITX2	12100	16	483	0.64	6	2.2e-05	0.0003
SMARCA4	12100	61	483	2.43	11	2.5e-05	0.00033
BCL11A	12100	41	483	1.64	9	2.7e-05	0.00034
HMGA1	12100	17	483	0.68	6	3.3e-05	0.00042
TRIM16	12100	76	483	3.03	12	4.3e-05	0.00054
HIVEP1	12100	45	483	1.8	9	5.9e-05	0.00072
TARBP1	12100	45	483	1.8	9	5.9e-05	0.00072
NAB2	12100	27	483	1.08	7	6.8e-05	0.00082
HIC1	12100	36	483	1.44	8	6.9e-05	0.00082
MCM2	12100	46	483	1.84	9	7e-05	0.00083
CBFA2T3	12100	20	483	0.8	6	9.4e-05	0.0011
PCGF2	12100	95	483	3.79	13	9.7e-05	0.0011
SNRPB	12100	48	483	1.92	9	0.0001	0.0011
SIRT5	12100	38	483	1.52	8	0.0001	0.0012
ILF2	12100	205	483	8.18	20	0.0002	0.0023
HEXIM1	12100	15	483	0.6	5	0.00021	0.0023
YEATS2	12100	65	483	2.59	10	0.00023	0.0025
ZNF165	12100	79	483	3.15	11	0.00028	0.003
ZNF432	12100	34	483	1.36	7	0.00033	0.0034
SMAD3	12100	45	483	1.8	8	0.00036	0.0037
BRCA1	12100	17	483	0.68	5	0.00041	0.0042
SMAD7	12100	17	483	0.68	5	0.00041	0.0042
SOX12	12100	46	483	1.84	8	0.00042	0.0042
NME2	12100	70	483	2.79	10	0.00043	0.0043
GATA6	12100	47	483	1.88	8	0.00048	0.0048
ZHX3	12100	37	483	1.48	7	0.00056	0.0055
HMGXB4	12100	60	483	2.4	9	0.00058	0.0055
SUB1	12100	28	483	1.12	6	0.0007	0.0067
GTF2E1	12100	64	483	2.55	9	0.00093	0.0088
RBBP7	12100	30	483	1.2	6	0.001	0.0096
MAFG	12100	66	483	2.63	9	0.0012	0.011
SIRT3	12100	68	483	2.71	9	0.0014	0.013
MXI1	12100	32	483	1.28	6	0.0015	0.013
XRCC6	12100	22	483	0.88	5	0.0015	0.013
RERE	12100	45	483	1.8	7	0.0019	0.017
ING1	12100	47	483	1.88	7	0.0024	0.021
ESPL1	12100	25	483	1	5	0.0027	0.024
POLR2K	12100	185	483	7.38	16	0.003	0.026
HDGF	12100	49	483	1.96	7	0.0031	0.027
SATB1	12100	26	483	1.04	5	0.0033	0.028
SMAD1	12100	38	483	1.52	6	0.0037	0.031
HMGB2	12100	27	483	1.08	5	0.0039	0.032
NPAS2	12100	27	483	1.08	5	0.0039	0.032
KLF12	12100	51	483	2.04	7	0.0039	0.032
FOXK2	12100	53	483	2.12	7	0.0049	0.039
LDB2	12100	53	483	2.12	7	0.0049	0.039
MSC	12100	18	483	0.72	4	0.0049	0.039
BCL3	12100	67	483	2.67	8	0.005	0.04
DR1	12100	128	483	5.11	12	0.0051	0.04
KLF9	12100	54	483	2.16	7	0.0054	0.041
CEBPD	12100	54	483	2.16	7	0.0054	0.041
RFX5	12100	41	483	1.64	6	0.0054	0.041
SOX9	12100	41	483	1.64	6	0.0054	0.041
RNPS1	12100	41	483	1.64	6	0.0054	0.041
TLE2	12100	55	483	2.2	7	0.006	0.044
PCBD1	12100	149	483	5.95	13	0.0066	0.049

## Sheet: HCV_related
Regulon	Universe.Size	Regulon.Size	Total.Hits	Expected.Hits	Observed.Hits	Pvalue	Adjusted.Pvalue
NR1I2	12100	168	483	6.71	89	9.6e-81	8.7e-78
ESR1	12100	160	483	6.39	73	7.8e-60	3.5e-57
PTTG1	12100	153	483	6.11	69	4.3e-56	1.3e-53
TRIP13	12100	163	483	6.51	64	2.4e-47	5.3e-45
IRF8	12100	99	483	3.95	41	1.2e-31	2.1e-29
ARID3A	12100	108	483	4.31	42	4.7e-31	7.2e-29
NR1I3	12100	70	483	2.79	35	1e-30	1.3e-28
YEATS2	12100	80	483	3.19	35	3.6e-28	4.1e-26
HDAC11	12100	117	483	4.67	40	4.5e-27	4.5e-25
SALL1	12100	139	483	5.55	43	5.4e-27	4.9e-25
E2F8	12100	74	483	2.95	33	5.9e-27	4.9e-25
TARBP1	12100	163	483	6.51	46	7.1e-27	5.3e-25
AR	12100	144	483	5.75	43	2.7e-26	1.9e-24
ID1	12100	66	483	2.63	31	3e-26	1.9e-24
NCOR1	12100	86	483	3.43	34	1.3e-25	7.9e-24
SIRT5	12100	62	483	2.47	29	1.4e-24	8.1e-23
HOXA3	12100	77	483	3.07	31	9.8e-24	5.2e-22
HLF	12100	135	483	5.39	38	2.5e-22	1.3e-20
ZNF623	12100	145	483	5.79	39	4.3e-22	2.1e-20
TCOF1	12100	59	483	2.36	26	2.6e-21	1.2e-19
JRK	12100	121	483	4.83	35	4.4e-21	1.9e-19
MAF	12100	106	483	4.23	32	5.4e-20	2.2e-18
E2F5	12100	42	483	1.68	21	6.8e-19	2.7e-17
BARD1	12100	48	483	1.92	22	1.1e-18	4.1e-17
EZH2	12100	164	483	6.55	37	3.3e-18	1.2e-16
ADNP	12100	94	483	3.75	28	1.8e-17	6e-16
HEY1	12100	28	483	1.12	17	1.8e-17	6e-16
GTF3C5	12100	61	483	2.43	23	3.7e-17	1.2e-15
FOXM1	12100	89	483	3.55	27	4e-17	1.3e-15
GATA6	12100	64	483	2.55	23	1.3e-16	3.9e-15
SMAD6	12100	26	483	1.04	15	4.3e-15	1.3e-13
ASB6	12100	69	483	2.75	22	1.1e-14	3.1e-13
KHDRBS1	12100	51	483	2.04	19	2.8e-14	7.6e-13
KNTC1	12100	69	483	2.75	21	1.2e-13	3.3e-12
TRIM16	12100	109	483	4.35	25	7.2e-13	1.9e-11
PHF21A	12100	61	483	2.43	19	1.2e-12	2.9e-11
ZNF85	12100	25	483	1	13	1.9e-12	4.6e-11
LEF1	12100	71	483	2.83	20	2.4e-12	5.8e-11
MAFB	12100	43	483	1.72	16	3.2e-12	7.4e-11
MCM4	12100	45	483	1.8	16	7.2e-12	1.6e-10
RFX5	12100	45	483	1.8	16	7.2e-12	1.6e-10
GTF2IRD1	12100	54	483	2.16	17	1.5e-11	3.3e-10
SMARCD3	12100	32	483	1.28	13	9.7e-11	2e-09
EGR1	12100	28	483	1.12	12	2.4e-10	5e-09
NME2	12100	73	483	2.91	18	3.5e-10	7e-09
ETV3	12100	65	483	2.59	17	4e-10	7.7e-09
SALL2	12100	65	483	2.59	17	4e-10	7.7e-09
NFE2L3	12100	66	483	2.63	17	5.2e-10	9.7e-09
SCMH1	12100	59	483	2.36	16	7.3e-10	1.3e-08
TULP3	12100	32	483	1.28	12	1.6e-09	2.8e-08
SMARCA4	12100	158	483	6.31	25	3.3e-09	5.9e-08
SATB2	12100	22	483	0.88	10	3.9e-09	6.8e-08
MYBL2	12100	50	483	2	14	5.4e-09	9.2e-08
FOS	12100	36	483	1.44	12	7.5e-09	1.3e-07
TTF2	12100	60	483	2.4	15	8.5e-09	1.4e-07
PPARGC1A	12100	52	483	2.08	14	9.5e-09	1.5e-07
SEC14L2	12100	102	483	4.07	19	1.7e-08	2.7e-07
ARNT2	12100	55	483	2.2	14	2.1e-08	3.3e-07
MED12	12100	60	483	2.4	14	6.9e-08	1e-06
MYEF2	12100	79	483	3.15	16	6.9e-08	1e-06
NPM1	12100	82	483	3.27	16	1.2e-07	1.8e-06
KLF9	12100	45	483	1.8	12	1.2e-07	1.8e-06
MXD3	12100	31	483	1.24	10	1.9e-07	2.8e-06
CHD7	12100	56	483	2.24	13	2.2e-07	3.1e-06
CNOT6	12100	86	483	3.43	16	2.4e-07	3.3e-06
MCM2	12100	48	483	1.92	12	2.7e-07	3.7e-06
ILF2	12100	197	483	7.86	25	2.9e-07	4e-06
SNRPB	12100	90	483	3.59	16	4.5e-07	6.1e-06
ETS2	12100	92	483	3.67	16	6.2e-07	8.1e-06
NR1H4	12100	54	483	2.16	12	1.1e-06	1.4e-05
NOTCH3	12100	74	483	2.95	14	1.1e-06	1.4e-05
ZNF354A	12100	30	483	1.2	9	1.6e-06	2e-05
ETV4	12100	31	483	1.24	9	2.2e-06	2.7e-05
ATF7	12100	58	483	2.32	12	2.4e-06	2.9e-05
ZNF83	12100	40	483	1.6	10	2.7e-06	3.3e-05
NR3C2	12100	84	483	3.35	14	5.3e-06	6.3e-05
COIL	12100	35	483	1.4	9	6.7e-06	7.8e-05
HEY2	12100	27	483	1.08	8	6.9e-06	8e-05
DDIT3	12100	45	483	1.8	10	8.5e-06	9.7e-05
DACH1	12100	36	483	1.44	9	8.6e-06	9.7e-05
ZFPM2	12100	95	483	3.79	14	2.3e-05	0.00025
TCF3	12100	84	483	3.35	13	2.6e-05	0.00029
DDB2	12100	51	483	2.04	10	2.7e-05	0.0003
SMARCA2	12100	85	483	3.39	13	3e-05	0.00032
MCM7	12100	42	483	1.68	9	3.3e-05	0.00035
TP53BP1	12100	42	483	1.68	9	3.3e-05	0.00035
TRIM22	12100	99	483	3.95	14	3.6e-05	0.00038
RORA	12100	43	483	1.72	9	4e-05	0.0004
TRIM32	12100	25	483	1	7	4e-05	0.0004
POLR1E	12100	43	483	1.72	9	4e-05	0.0004
ARID4B	12100	114	483	4.55	15	4.6e-05	0.00046
TCF21	12100	36	483	1.44	8	6.9e-05	0.00067
TCEA2	12100	106	483	4.23	14	7.9e-05	0.00076
CREB3L1	12100	20	483	0.8	6	9.4e-05	0.00091
SAP18	12100	98	483	3.91	13	0.00013	0.0013
NR0B2	12100	31	483	1.24	7	0.00018	0.0017
SMURF2	12100	41	483	1.64	8	0.00018	0.0017
DR1	12100	64	483	2.55	10	0.0002	0.0019
SMAD7	12100	15	483	0.6	5	0.00021	0.002
PCBD1	12100	206	483	8.22	20	0.00022	0.002
HDAC2	12100	54	483	2.16	9	0.00026	0.0023
HAX1	12100	79	483	3.15	11	0.00028	0.0025
PRDM4	12100	24	483	0.96	6	0.00029	0.0025
PIAS3	12100	55	483	2.2	9	0.0003	0.0026
DIP2C	12100	45	483	1.8	8	0.00036	0.0031
TRPS1	12100	25	483	1	6	0.00036	0.0031
MCM3	12100	36	483	1.44	7	0.00047	0.004
MYCN	12100	18	483	0.72	5	0.00055	0.0046
SOX12	12100	27	483	1.08	6	0.00057	0.0047
HABP4	12100	38	483	1.52	7	0.00067	0.0055
HOXA5	12100	28	483	1.12	6	0.0007	0.0056
RFX3	12100	28	483	1.12	6	0.0007	0.0056
DNMT3A	12100	19	483	0.76	5	0.00072	0.0057
HMGA2	12100	19	483	0.76	5	0.00072	0.0057
BRIP1	12100	19	483	0.76	5	0.00072	0.0057
PLAGL2	12100	39	483	1.56	7	0.00078	0.0061
ZNF544	12100	39	483	1.56	7	0.00078	0.0061
SOX9	12100	91	483	3.63	11	0.00097	0.0074
GTF3C4	12100	52	483	2.08	8	0.00097	0.0074
WDHD1	12100	65	483	2.59	9	0.001	0.0079
ESPL1	12100	21	483	0.84	5	0.0012	0.0089
PER2	12100	68	483	2.71	9	0.0014	0.011
HMGXB4	12100	33	483	1.32	6	0.0017	0.013
PDCD11	12100	57	483	2.28	8	0.0018	0.013
SNIP1	12100	57	483	2.28	8	0.0018	0.013
ZNF324	12100	34	483	1.36	6	0.002	0.015
SMARCC1	12100	25	483	1	5	0.0027	0.019
HMGB3	12100	48	483	1.92	7	0.0028	0.019
RBM15B	12100	36	483	1.44	6	0.0028	0.019
SUB1	12100	89	483	3.55	10	0.0028	0.02
RNF4	12100	49	483	1.96	7	0.0031	0.021
SUPT3H	12100	26	483	1.04	5	0.0033	0.022
SNRPD1	12100	77	483	3.07	9	0.0035	0.024
HOXA7	12100	38	483	1.52	6	0.0037	0.025
HMGN2	12100	40	483	1.6	6	0.0047	0.032
DLX6	12100	18	483	0.72	4	0.0049	0.032
HMGB2	12100	18	483	0.72	4	0.0049	0.032
RBL2	12100	53	483	2.12	7	0.0049	0.032
CBFA2T3	12100	29	483	1.16	5	0.0053	0.035
HEXIM1	12100	19	483	0.76	4	0.006	0.039
EHF	12100	56	483	2.24	7	0.0066	0.042
ELF1	12100	43	483	1.72	6	0.0068	0.043
POLR3C	12100	43	483	1.72	6	0.0068	0.043
SSBP2	12100	87	483	3.47	9	0.0078	0.049

## Sheet: Alcohoic_related
Regulon	Universe.Size	Regulon.Size	Total.Hits	Expected.Hits	Observed.Hits	Pvalue	Adjusted.Pvalue
E2F8	11768	103	483	4.23	43	7.7e-33	3.4e-30
FOXM1	11768	91	483	3.73	35	1.9e-25	4.3e-23
NR1I3	11768	45	483	1.85	26	5.4e-25	8e-23
EGR1	11768	65	483	2.67	30	8.2e-25	9.1e-23
TRIP13	11768	35	483	1.44	21	6.7e-21	6e-19
ZNF282	11768	41	483	1.68	20	1.5e-17	1.1e-15
ESR1	11768	147	483	6.03	34	8.1e-17	5.2e-15
GTF2IRD1	11768	56	483	2.3	20	2.5e-14	1.4e-12
TARBP2	11768	71	483	2.91	22	3.7e-14	1.8e-12
PTTG1	11768	40	483	1.64	17	7.5e-14	3.3e-12
PARP1	11768	52	483	2.13	18	9.4e-13	3.6e-11
NME2	11768	59	483	2.42	19	9.6e-13	3.6e-11
PPARG	11768	20	483	0.82	12	1.9e-12	6.4e-11
SUPT6H	11768	94	483	3.86	23	2.5e-12	7.9e-11
MCM5	11768	40	483	1.64	15	2e-11	5.9e-10
HLF	11768	50	483	2.05	16	6.9e-11	1.9e-09
HMGA1	11768	75	483	3.08	19	1.1e-10	2.8e-09
YEATS2	11768	47	483	1.93	15	2.9e-10	7.1e-09
DAXX	11768	98	483	4.02	21	3.3e-10	7.8e-09
NR3C1	11768	63	483	2.59	17	3.6e-10	7.9e-09
MAX	11768	41	483	1.68	14	4.1e-10	8.2e-09
NPM1	11768	41	483	1.68	14	4.1e-10	8.2e-09
TRIM16	11768	35	483	1.44	13	5.2e-10	1e-08
FOS	11768	25	483	1.03	11	1.3e-09	2.4e-08
TBC1D2B	11768	31	483	1.27	12	1.4e-09	2.5e-08
MCM4	11768	38	483	1.56	13	1.7e-09	2.9e-08
REXO4	11768	54	483	2.22	15	2.5e-09	4.2e-08
JMJD1C	11768	63	483	2.59	16	3.1e-09	5e-08
FOXF1	11768	17	483	0.7	9	5.6e-09	8.6e-08
GTF2E1	11768	20	483	0.82	9	3.4e-08	5.1e-07
PITX1	11768	343	483	14.08	37	6.9e-08	1e-06
MEN1	11768	44	483	1.81	12	1.3e-07	1.8e-06
HDAC11	11768	37	483	1.52	11	1.6e-07	2.2e-06
MCM3	11768	39	483	1.6	11	2.9e-07	3.8e-06
TRIM22	11768	56	483	2.3	13	3e-07	3.8e-06
NPAS2	11768	25	483	1.03	9	3.5e-07	4.3e-06
AR	11768	43	483	1.76	11	8.7e-07	1e-05
NR1I2	11768	45	483	1.85	11	1.4e-06	1.6e-05
MCM6	11768	22	483	0.9	8	1.5e-06	1.6e-05
TIMELESS	11768	22	483	0.9	8	1.5e-06	1.6e-05
TRIB3	11768	56	483	2.3	12	2.1e-06	2.3e-05
MSX1	11768	33	483	1.35	9	4.9e-06	5.2e-05
SMARCA4	11768	26	483	1.07	8	6.2e-06	6.4e-05
FOXK2	11768	27	483	1.11	8	8.5e-06	8.6e-05
ENO1	11768	109	483	4.47	16	8.9e-06	8.8e-05
SNRPD1	11768	36	483	1.48	9	1.1e-05	0.0001
POLR2G	11768	40	483	1.64	9	2.7e-05	0.00026
POLR2K	11768	72	483	2.96	12	3.2e-05	0.0003
LDB2	11768	43	483	1.76	9	5e-05	0.00045
RELB	11768	101	483	4.15	14	6.2e-05	0.00055
RUVBL2	11768	79	483	3.24	12	8.3e-05	0.00071
SUV39H2	11768	36	483	1.48	8	8.3e-05	0.00071
SUB1	11768	82	483	3.37	12	0.00012	0.001
PHF1	11768	48	483	1.97	9	0.00012	0.001
BIN1	11768	39	483	1.6	8	0.00015	0.0012
SNRPB	11768	41	483	1.68	8	0.00022	0.0017
KLF12	11768	43	483	1.76	8	0.00031	0.0024
LRRFIP1	11768	68	483	2.79	10	0.00042	0.0032
CNOT3	11768	82	483	3.37	11	0.0005	0.0038
POLR2L	11768	71	483	2.91	10	0.0006	0.0045
PITX3	11768	201	483	8.25	19	0.00061	0.0045
BARD1	11768	27	483	1.11	6	0.00066	0.0046
ERG	11768	27	483	1.11	6	0.00066	0.0046
ZNF638	11768	72	483	2.96	10	0.00067	0.0047
SALL1	11768	60	483	2.46	9	0.0007	0.0048
ZBTB22	11768	19	483	0.78	5	0.00082	0.0056
EHMT2	11768	88	483	3.61	11	0.00091	0.006
SMARCA2	11768	39	483	1.6	7	0.00092	0.006
SMARCD3	11768	40	483	1.64	7	0.0011	0.007
ATF7IP	11768	30	483	1.23	6	0.0012	0.0076
MYBL2	11768	31	483	1.27	6	0.0014	0.0089
RFXANK	11768	54	483	2.22	8	0.0015	0.0093
IRF8	11768	23	483	0.94	5	0.0021	0.013
TTF2	11768	24	483	0.99	5	0.0025	0.015
DDB1	11768	16	483	0.66	4	0.0034	0.02
ZFP64	11768	16	483	0.66	4	0.0034	0.02
ETS2	11768	62	483	2.54	8	0.0037	0.021
BRCA1	11768	63	483	2.59	8	0.004	0.023
RFX5	11768	27	483	1.11	5	0.0044	0.024
BUD31	11768	92	483	3.78	10	0.0044	0.024
DEDD	11768	27	483	1.11	5	0.0044	0.024
SOX4	11768	28	483	1.15	5	0.0051	0.028
MED12	11768	28	483	1.15	5	0.0051	0.028
MCM2	11768	18	483	0.74	4	0.0054	0.029
TRIM28	11768	85	483	3.49	9	0.0079	0.041
TCF21	11768	31	483	1.27	5	0.008	0.041
AFF4	11768	20	483	0.82	4	0.008	0.041
RREB1	11768	21	483	0.86	4	0.0096	0.049

## Sheet: Metabolic_related
Regulon	Universe.Size	Regulon.Size	Total.Hits	Expected.Hits	Observed.Hits	Pvalue	Adjusted.Pvalue
PTTG1	11794	56	483	2.29	28	1.7e-24	1.1e-21
SOX12	11794	61	483	2.5	27	7.2e-22	2.4e-19
TRIP13	11794	38	483	1.56	21	7.1e-20	1.6e-17
TRIM16	11794	59	483	2.42	23	2.6e-17	4.4e-15
E2F8	11794	36	483	1.47	17	8.1e-15	1.1e-12
MCM4	11794	50	483	2.05	19	2.8e-14	3.2e-12
MCM5	11794	24	483	0.98	13	1.3e-12	1.2e-10
ESR1	11794	38	483	1.56	15	8e-12	6.7e-10
FOXM1	11794	45	483	1.84	16	1.1e-11	7.8e-10
GCM1	11794	168	483	6.88	27	9.4e-10	6.3e-08
SMARCA1	11794	34	483	1.39	12	4.7e-09	2.8e-07
ARID3A	11794	22	483	0.9	10	5e-09	2.8e-07
CHD8	11794	19	483	0.78	9	1.9e-08	9.9e-07
NFIL3	11794	55	483	2.25	14	2.9e-08	1.4e-06
TBX4	11794	194	483	7.94	26	9.2e-08	4.1e-06
MCM7	11794	19	483	0.78	8	3.8e-07	1.6e-05
HMGA2	11794	58	483	2.38	13	4.5e-07	1.8e-05
ZKSCAN3	11794	50	483	2.05	12	5.7e-07	2.1e-05
NR1I2	11794	20	483	0.82	8	6.1e-07	2.1e-05
MYC	11794	29	483	1.19	9	1.4e-06	4.8e-05
BZW1	11794	51	483	2.09	11	5.2e-06	0.00017
DPF3	11794	35	483	1.43	9	8.2e-06	0.00025
MCM3	11794	47	483	1.92	10	1.6e-05	0.00046
EZH2	11794	24	483	0.98	7	3.5e-05	0.00097
KLF1	11794	236	483	9.66	24	3.7e-05	0.00099
XBP1	11794	17	483	0.7	6	3.8e-05	0.00099
IRF8	11794	87	483	3.56	13	5e-05	0.0012
TAF11	11794	36	483	1.47	8	8.2e-05	0.002
CEBPD	11794	28	483	1.15	7	0.0001	0.0024
PAPOLA	11794	96	483	3.93	13	0.00014	0.0031
STAT3	11794	30	483	1.23	7	0.00017	0.0036
SIX1	11794	101	483	4.14	13	0.00023	0.0049
TIMELESS	11794	15	483	0.61	5	0.00024	0.0049
HIF1AN	11794	23	483	0.94	6	0.00025	0.005
DIP2C	11794	43	483	1.76	8	0.00031	0.0058
JRK	11794	34	483	1.39	7	0.00038	0.007
DENND4A	11794	35	483	1.43	7	0.00046	0.0083
HCLS1	11794	113	483	4.63	13	0.00071	0.012
ZSCAN2	11794	19	483	0.78	5	0.00081	0.014
NFIX	11794	64	483	2.62	9	0.0011	0.019
RAD51	11794	21	483	0.86	5	0.0013	0.022
ANKS1A	11794	80	483	3.28	10	0.0015	0.024
MAF	11794	32	483	1.31	6	0.0017	0.026
TRIM24	11794	23	483	0.94	5	0.0021	0.03
RBM7	11794	23	483	0.94	5	0.0021	0.03
BARD1	11794	24	483	0.98	5	0.0025	0.036
ZNF219	11794	74	483	3.03	9	0.0031	0.044
SNRPB	11794	49	483	2.01	7	0.0036	0.05

## Sheet: GO_AllLists
Category	CategoryID	GO	Description	LogP	Enrichment	Z-score	#TotalGeneInLibrary	#GeneInGO	#GeneInHitList	#GeneInGOAndHitList	%InGO	STDV %InGO	GeneID	Hits	Log(q-value)	GeneList
GO Biological Processes	19	GO:0000122	negative regulation of transcription by RNA polymerase II	-22.4577	10.0632	16.2245	22539	789	88	31	35.2273	5.09207	142|367|1958|2023|2099|2114|2294|2305|2908|3394|4149|4221|4487|5468|5971|5993|6239|6299|6595|6597|6943|8914|9208|10155|10919|11278|55689|55729|57761|79723|79733	PARP1|AR|EGR1|ENO1|ESR1|ETS2|FOXF1|FOXM1|NR3C1|IRF8|MAX|MEN1|MSX1|PPARG|RELB|RFX5|RREB1|SALL1|SMARCA2|SMARCA4|TCF21|TIMELESS|LRRFIP1|TRIM28|EHMT2|KLF12|YEATS2|ATF7IP|TRIB3|SUV39H2|E2F8	-18.6345	Alcohoic_related
GO Biological Processes	19	GO:0006367	transcription initiation from RNA polymerase II promoter	-15.2262	20.6552	16.8519	22539	186	88	15	17.0455	4.00851	367|2099|2908|2960|3394|5436|5440|5441|5468|8856|9968|9970|10155|10923|55729	AR|ESR1|NR3C1|GTF2E1|IRF8|POLR2G|POLR2K|POLR2L|PPARG|NR1I2|MED12|NR1I3|TRIM28|SUB1|ATF7IP	-11.7709	Alcohoic_related
GO Biological Processes	19	GO:0006325	chromatin organization	-13.8038	7.6208	11.7271	22539	773	88	23	26.1364	4.68378	672|1616|1642|2099|2908|3159|4171|4221|4869|5252|6299|6595|6597|6604|6830|10155|10626|10856|10919|55689|79723|79885|221037	BRCA1|DAXX|DDB1|ESR1|NR3C1|HMGA1|MCM2|MEN1|NPM1|PHF1|SALL1|SMARCA2|SMARCA4|SMARCD3|SUPT6H|TRIM28|TRIM16|RUVBL2|EHMT2|YEATS2|SUV39H2|HDAC11|JMJD1C	-10.5035	Alcohoic_related
GO Biological Processes	19	GO:0006352	DNA-templated transcription, initiation	-13.5531	15.9414	14.5998	22539	241	88	15	17.0455	4.00851	367|2099|2908|2960|3394|5436|5440|5441|5468|8856|9968|9970|10155|10923|55729	AR|ESR1|NR3C1|GTF2E1|IRF8|POLR2G|POLR2K|POLR2L|PPARG|NR1I2|MED12|NR1I3|TRIM28|SUB1|ATF7IP	-10.3319	Alcohoic_related
GO Biological Processes	19	GO:0043401	steroid hormone mediated signaling pathway	-12.2751	17.4326	14.2786	22539	191	88	13	14.7727	3.78249	142|367|672|1616|2099|2908|5468|6597|6943|8856|8896|9968|9970	PARP1|AR|BRCA1|DAXX|ESR1|NR3C1|PPARG|SMARCA4|TCF21|NR1I2|BUD31|MED12|NR1I3	-9.25346	Alcohoic_related
GO Biological Processes	19	GO:0016569	covalent chromatin modification	-11.3581	8.27693	10.8874	22539	557	88	18	20.4545	4.29993	672|1616|1642|2908|4221|5252|6299|6597|6604|6830|10155|10626|10856|10919|55689|79723|79885|221037	BRCA1|DAXX|DDB1|NR3C1|MEN1|PHF1|SALL1|SMARCA4|SMARCD3|SUPT6H|TRIM28|TRIM16|RUVBL2|EHMT2|YEATS2|SUV39H2|HDAC11|JMJD1C	-8.41458	Alcohoic_related
CORUM	33	CORUM:387	MCM complex	-11.3155	213.438	32.5821	22539	6	88	5	5.68182	2.46774	4171|4172|4173|4174|4175	MCM2|MCM3|MCM4|MCM5|MCM6	-8.41305	Alcohoic_related
GO Biological Processes	19	GO:0030522	intracellular receptor signaling pathway	-11.2668	12.5816	12.3188	22539	285	88	14	15.9091	3.89902	142|367|672|1616|2099|2908|5468|6597|6943|8856|8896|9968|9970|10626	PARP1|AR|BRCA1|DAXX|ESR1|NR3C1|PPARG|SMARCA4|TCF21|NR1I2|BUD31|MED12|NR1I3|TRIM16	-8.38146	Alcohoic_related
GO Biological Processes	19	GO:0071407	cellular response to organic cyclic compound	-11.2045	8.10237	10.743	22539	569	88	18	20.4545	4.29993	142|367|672|1616|1958|2099|2294|2908|4869|5468|6597|6895|6943|8856|8896|9968|9970|10856	PARP1|AR|BRCA1|DAXX|EGR1|ESR1|FOXF1|NR3C1|NPM1|PPARG|SMARCA4|TARBP2|TCF21|NR1I2|BUD31|MED12|NR1I3|RUVBL2	-8.3503	Alcohoic_related
GO Biological Processes	19	GO:0009755	hormone-mediated signaling pathway	-11.1999	14.3518	12.7981	22539	232	88	13	14.7727	3.78249	142|367|672|1616|2099|2908|5468|6597|6943|8856|8896|9968|9970	PARP1|AR|BRCA1|DAXX|ESR1|NR3C1|PPARG|SMARCA4|TCF21|NR1I2|BUD31|MED12|NR1I3	-8.3503	Alcohoic_related
GO Biological Processes	19	GO:0030518	intracellular steroid hormone receptor signaling pathway	-11.1883	20.4158	14.3232	22539	138	88	11	12.5	3.52548	142|367|672|1616|2099|2908|6597|6943|8896|9968|9970	PARP1|AR|BRCA1|DAXX|ESR1|NR3C1|SMARCA4|TCF21|BUD31|MED12|NR1I3	-8.3503	Alcohoic_related
GO Biological Processes	19	GO:0006281	DNA repair	-10.6795	8.21533	10.5239	22539	530	88	17	19.3182	4.20852	142|580|672|1642|2305|3159|4221|4862|4869|5436|5440|5441|8914|9232|9319|10155|10856	PARP1|BARD1|BRCA1|DDB1|FOXM1|HMGA1|MEN1|NPAS2|NPM1|POLR2G|POLR2K|POLR2L|TIMELESS|PTTG1|TRIP13|TRIM28|RUVBL2	-7.87049	Alcohoic_related
GO Biological Processes	19	GO:0071383	cellular response to steroid hormone stimulus	-10.6201	12.9055	12.0413	22539	258	88	13	14.7727	3.78249	142|367|672|1616|2099|2908|5468|6597|6943|8856|8896|9968|9970	PARP1|AR|BRCA1|DAXX|ESR1|NR3C1|PPARG|SMARCA4|TCF21|NR1I2|BUD31|MED12|NR1I3	-7.83829	Alcohoic_related
GO Biological Processes	19	GO:0032870	cellular response to hormone stimulus	-9.85492	6.70094	9.50794	22539	688	88	18	20.4545	4.29993	142|367|672|1616|2099|2353|2908|4149|4221|5468|6597|6943|8856|8896|9968|9970|10856|57761	PARP1|AR|BRCA1|DAXX|ESR1|FOS|NR3C1|MAX|MEN1|PPARG|SMARCA4|TCF21|NR1I2|BUD31|MED12|NR1I3|RUVBL2|TRIB3	-7.13435	Alcohoic_related
GO Biological Processes	19	GO:0044770	cell cycle phase transition	-9.83146	7.2448	9.7149	22539	601	88	17	19.3182	4.20852	672|1642|2305|4149|4171|4172|4173|4174|4175|4221|4849|4869|6604|6659|8914|9319|79733	BRCA1|DDB1|FOXM1|MAX|MCM2|MCM3|MCM4|MCM5|MCM6|MEN1|CNOT3|NPM1|SMARCD3|SOX4|TIMELESS|TRIP13|E2F8	-7.12216	Alcohoic_related
GO Biological Processes	19	GO:0030521	androgen receptor signaling pathway	-9.67596	30.5821	15.1819	22539	67	88	8	9.09091	3.06454	367|672|1616|6597|6943|8896|9968|9970	AR|BRCA1|DAXX|SMARCA4|TCF21|BUD31|MED12|NR1I3	-6.97766	Alcohoic_related
GO Biological Processes	19	GO:0048545	response to steroid hormone	-9.47717	9.21787	10.236	22539	389	88	14	15.9091	3.89902	142|367|672|1616|2099|2353|2908|5468|6597|6943|8856|8896|9968|9970	PARP1|AR|BRCA1|DAXX|ESR1|FOS|NR3C1|PPARG|SMARCA4|TCF21|NR1I2|BUD31|MED12|NR1I3	-6.83003	Alcohoic_related
GO Biological Processes	19	GO:0032508	DNA duplex unwinding	-9.32181	27.6892	14.3972	22539	74	88	8	9.09091	3.06454	142|1642|3159|4171|4173|4174|4175|10856	PARP1|DDB1|HMGA1|MCM2|MCM4|MCM5|MCM6|RUVBL2	-6.69356	Alcohoic_related
Reactome Gene Sets	6	R-HSA-176974	Unwinding of DNA	-9.2029	106.719	22.9336	22539	12	88	5	5.68182	2.46774	4171|4172|4173|4174|4175	MCM2|MCM3|MCM4|MCM5|MCM6	-6.61855	Alcohoic_related
GO Biological Processes	19	GO:0006338	chromatin remodeling	-9.00671	15.4292	11.682	22539	166	88	10	11.3636	3.38317	1616|2099|3159|4869|6595|6597|6604|6830|10856|79723	DAXX|ESR1|HMGA1|NPM1|SMARCA2|SMARCA4|SMARCD3|SUPT6H|RUVBL2|SUV39H2	-6.45455	Alcohoic_related
GO Biological Processes	19	GO:0032392	DNA geometric change	-8.87426	24.3929	13.4477	22539	84	88	8	9.09091	3.06454	142|1642|3159|4171|4173|4174|4175|10856	PARP1|DDB1|HMGA1|MCM2|MCM4|MCM5|MCM6|RUVBL2	-6.33733	Alcohoic_related
GO Biological Processes	19	GO:0006260	DNA replication	-8.76652	10.4186	10.1947	22539	295	88	12	13.6364	3.65825	142|580|672|3159|4171|4172|4173|4174|4175|8914|10919|79733	PARP1|BARD1|BRCA1|HMGA1|MCM2|MCM3|MCM4|MCM5|MCM6|TIMELESS|EHMT2|E2F8	-6.24432	Alcohoic_related
GO Biological Processes	19	GO:0044772	mitotic cell cycle phase transition	-8.37582	6.86049	8.79236	22539	560	88	15	17.0455	4.00851	672|1642|2305|4149|4171|4172|4173|4174|4175|4849|4869|6604|6659|9319|79733	BRCA1|DDB1|FOXM1|MAX|MCM2|MCM3|MCM4|MCM5|MCM6|CNOT3|NPM1|SMARCD3|SOX4|TRIP13|E2F8	-5.90797	Alcohoic_related
GO Biological Processes	19	GO:0071396	cellular response to lipid	-8.30327	6.77579	8.72066	22539	567	88	15	17.0455	4.00851	142|367|672|1616|2099|2908|3394|5468|6597|6943|8856|8896|9968|9970|10856	PARP1|AR|BRCA1|DAXX|ESR1|NR3C1|IRF8|PPARG|SMARCA4|TCF21|NR1I2|BUD31|MED12|NR1I3|RUVBL2	-5.85417	Alcohoic_related
GO Biological Processes	19	GO:0071824	protein-DNA complex subunit organization	-7.99196	10.245	9.65724	22539	275	88	11	12.5	3.52548	142|1616|1642|2099|3159|4171|4869|6597|6604|6830|55729	PARP1|DAXX|DDB1|ESR1|HMGA1|MCM2|NPM1|SMARCA4|SMARCD3|SUPT6H|ATF7IP	-5.58923	Alcohoic_related
GO Biological Processes	19	GO:0006268	DNA unwinding involved in DNA replication	-7.82379	128.062	22.5037	22539	8	88	4	4.54545	2.22047	3159|4171|4173|4175	HMGA1|MCM2|MCM4|MCM6	-5.46296	Alcohoic_related
GO Biological Processes	19	GO:0043414	macromolecule methylation	-7.80062	9.81664	9.4111	22539	287	88	11	12.5	3.52548	142|672|2353|4221|5252|6628|6830|10155|10919|55729|79723	PARP1|BRCA1|FOS|MEN1|PHF1|SNRPB|SUPT6H|TRIM28|EHMT2|ATF7IP|SUV39H2	-5.44475	Alcohoic_related
GO Biological Processes	19	GO:0033143	regulation of intracellular steroid hormone receptor signaling pathway	-7.76033	23.905	12.4394	22539	75	88	7	7.95455	2.88448	142|367|672|2099|6597|6943|8896	PARP1|AR|BRCA1|ESR1|SMARCA4|TCF21|BUD31	-5.42376	Alcohoic_related
GO Biological Processes	19	GO:0016570	histone modification	-7.73943	7.4823	8.64676	22539	445	88	13	14.7727	3.78249	672|1642|4221|5252|6299|6830|10626|10856|10919|55689|79723|79885|221037	BRCA1|DDB1|MEN1|PHF1|SALL1|SUPT6H|TRIM16|RUVBL2|EHMT2|YEATS2|SUV39H2|HDAC11|JMJD1C	-5.40755	Alcohoic_related
GO Biological Processes	19	GO:0044843	cell cycle G1/S phase transition	-7.7235	9.64854	9.31279	22539	292	88	11	12.5	3.52548	4149|4171|4172|4173|4174|4175|4221|4849|4869|6659|79733	MAX|MCM2|MCM3|MCM4|MCM5|MCM6|MEN1|CNOT3|NPM1|SOX4|E2F8	-5.39812	Alcohoic_related
GO Biological Processes	19	GO:2001022	positive regulation of response to DNA damage stimulus	-7.67971	23.2841	12.263	22539	77	88	7	7.95455	2.88448	142|672|2305|4487|4862|8914|10155	PARP1|BRCA1|FOXM1|MSX1|NPAS2|TIMELESS|TRIM28	-5.37062	Alcohoic_related
GO Biological Processes	19	GO:0045739	positive regulation of DNA repair	-7.55073	32.6968	13.6186	22539	47	88	6	6.81818	2.68694	142|672|2305|4862|8914|10155	PARP1|BRCA1|FOXM1|NPAS2|TIMELESS|TRIM28	-5.28821	Alcohoic_related
GO Biological Processes	19	GO:0018205	peptidyl-lysine modification	-7.4537	7.94186	8.62395	22539	387	88	12	13.6364	3.65825	672|1958|4221|5252|6659|6830|10155|10626|10856|10919|55689|79723	BRCA1|EGR1|MEN1|PHF1|SOX4|SUPT6H|TRIM28|TRIM16|RUVBL2|EHMT2|YEATS2|SUV39H2	-5.19867	Alcohoic_related
GO Biological Processes	19	GO:0051052	regulation of DNA metabolic process	-7.41697	7.88077	8.5817	22539	390	88	12	13.6364	3.65825	142|672|2305|4221|4862|4869|5468|6830|8914|10155|10919|79733	PARP1|BRCA1|FOXM1|MEN1|NPAS2|NPM1|PPARG|SUPT6H|TIMELESS|TRIM28|EHMT2|E2F8	-5.17732	Alcohoic_related
Reactome Gene Sets	6	R-HSA-383280	Nuclear Receptor transcription pathway	-7.38456	30.735	13.178	22539	50	88	6	6.81818	2.68694	367|2099|2908|5468|8856|9970	AR|ESR1|NR3C1|PPARG|NR1I2|NR1I3	-5.16339	Alcohoic_related
CORUM	33	CORUM:2825	BRCA1-RNA polymerase II complex	-7.30221	49.2548	15.4132	22539	26	88	5	5.68182	2.46774	672|2960|5436|5440|5441	BRCA1|GTF2E1|POLR2G|POLR2K|POLR2L	-5.09176	Alcohoic_related
GO Biological Processes	19	GO:0032259	methylation	-6.9486	8.09591	8.35199	22539	348	88	11	12.5	3.52548	142|672|2353|4221|5252|6628|6830|10155|10919|55729|79723	PARP1|BRCA1|FOS|MEN1|PHF1|SNRPB|SUPT6H|TRIM28|EHMT2|ATF7IP|SUV39H2	-4.78813	Alcohoic_related
GO Biological Processes	19	GO:0000082	G1/S transition of mitotic cell cycle	-6.94544	9.38187	8.72333	22539	273	88	10	11.3636	3.38317	4149|4171|4172|4173|4174|4175|4849|4869|6659|79733	MAX|MCM2|MCM3|MCM4|MCM5|MCM6|CNOT3|NPM1|SOX4|E2F8	-4.7881	Alcohoic_related
GO Biological Processes	19	GO:0006261	DNA-dependent DNA replication	-6.90597	13.7517	9.7772	22539	149	88	8	9.09091	3.06454	142|3159|4171|4172|4173|4174|4175|79733	PARP1|HMGA1|MCM2|MCM3|MCM4|MCM5|MCM6|E2F8	-4.75483	Alcohoic_related
Reactome Gene Sets	6	R-HSA-68962	Activation of the pre-replicative complex	-6.8243	40.0195	13.8286	22539	32	88	5	5.68182	2.46774	4171|4172|4173|4174|4175	MCM2|MCM3|MCM4|MCM5|MCM6	-4.67928	Alcohoic_related
Reactome Gene Sets	6	R-HSA-69190	DNA strand elongation	-6.8243	40.0195	13.8286	22539	32	88	5	5.68182	2.46774	4171|4172|4173|4174|4175	MCM2|MCM3|MCM4|MCM5|MCM6	-4.67928	Alcohoic_related
CORUM	33	CORUM:2686	BRCA1-core RNA polymerase II complex	-6.82107	78.8077	17.5684	22539	13	88	4	4.54545	2.22047	672|5436|5440|5441	BRCA1|POLR2G|POLR2K|POLR2L	-4.67907	Alcohoic_related
GO Biological Processes	19	GO:0019827	stem cell population maintenance	-6.77378	13.2194	9.55711	22539	155	88	8	9.09091	3.06454	4849|5436|5440|5441|6299|6659|9079|9968	CNOT3|POLR2G|POLR2K|POLR2L|SALL1|SOX4|LDB2|MED12	-4.64368	Alcohoic_related
GO Biological Processes	19	GO:0010564	regulation of cell cycle process	-6.74471	5.15688	7.22368	22539	745	88	15	17.0455	4.00851	274|672|1642|2305|4149|4221|4487|4849|4869|6604|6659|9232|9319|10919|79733	BIN1|BRCA1|DDB1|FOXM1|MAX|MEN1|MSX1|CNOT3|NPM1|SMARCD3|SOX4|PTTG1|TRIP13|EHMT2|E2F8	-4.62333	Alcohoic_related
GO Biological Processes	19	GO:0098727	maintenance of cell number	-6.73095	13.051	9.48644	22539	157	88	8	9.09091	3.06454	4849|5436|5440|5441|6299|6659|9079|9968	CNOT3|POLR2G|POLR2K|POLR2L|SALL1|SOX4|LDB2|MED12	-4.61483	Alcohoic_related
Reactome Gene Sets	6	R-HSA-3700989	Transcriptional Regulation by TP53	-6.69349	7.63516	8.04569	22539	369	88	11	12.5	3.52548	580|672|1616|2353|4849|4869|5436|5440|5441|10919|79733	BARD1|BRCA1|DAXX|FOS|CNOT3|NPM1|POLR2G|POLR2K|POLR2L|EHMT2|E2F8	-4.58626	Alcohoic_related
GO Biological Processes	19	GO:0071103	DNA conformation change	-6.66087	8.74147	8.3505	22539	293	88	10	11.3636	3.38317	142|1616|1642|3159|4171|4173|4174|4175|4869|10856	PARP1|DAXX|DDB1|HMGA1|MCM2|MCM4|MCM5|MCM6|NPM1|RUVBL2	-4.55917	Alcohoic_related
CORUM	33	CORUM:2792	MCM2-MCM4-MCM6-MCM7 complex	-6.63942	192.094	23.9292	22539	4	88	3	3.40909	1.9344	4171|4173|4175	MCM2|MCM4|MCM6	-4.54318	Alcohoic_related
GO Biological Processes	19	GO:0006306	DNA methylation	-6.60963	22.9366	11.2581	22539	67	88	6	6.81818	2.68694	142|672|2353|10155|10919|55729	PARP1|BRCA1|FOS|TRIM28|EHMT2|ATF7IP	-4.52812	Alcohoic_related
GO Biological Processes	19	GO:0006305	DNA alkylation	-6.60963	22.9366	11.2581	22539	67	88	6	6.81818	2.68694	142|672|2353|10155|10919|55729	PARP1|BRCA1|FOS|TRIM28|EHMT2|ATF7IP	-4.52812	Alcohoic_related
GO Biological Processes	19	GO:0030330	DNA damage response, signal transduction by p53 class mediator	-6.60317	16.2989	10.0701	22539	110	88	7	7.95455	2.88448	672|2305|4487|4849|4869|6659|79733	BRCA1|FOXM1|MSX1|CNOT3|NPM1|SOX4|E2F8	-4.52812	Alcohoic_related
KEGG Pathway	24	hsa03030	DNA replication	-6.55731	35.5729	12.9972	22539	36	88	5	5.68182	2.46774	4171|4172|4173|4174|4175	MCM2|MCM3|MCM4|MCM5|MCM6	-4.49248	Alcohoic_related
GO Biological Processes	19	GO:0071156	regulation of cell cycle arrest	-6.52317	15.8662	9.91843	22539	113	88	7	7.95455	2.88448	274|672|2305|4849|4869|6659|79733	BIN1|BRCA1|FOXM1|CNOT3|NPM1|SOX4|E2F8	-4.46833	Alcohoic_related
Reactome Gene Sets	6	R-HSA-176187	Activation of ATR in response to replication stress	-6.49559	34.6115	12.8103	22539	37	88	5	5.68182	2.46774	4171|4172|4173|4174|4175	MCM2|MCM3|MCM4|MCM5|MCM6	-4.44808	Alcohoic_related
GO Biological Processes	19	GO:0016032	viral process	-6.47595	4.91288	6.97239	22539	782	88	15	17.0455	4.00851	274|1616|1642|2960|3159|4869|5436|5440|5441|6597|6830|6895|10155|10346|55729	BIN1|DAXX|DDB1|GTF2E1|HMGA1|NPM1|POLR2G|POLR2K|POLR2L|SMARCA4|SUPT6H|TARBP2|TRIM28|TRIM22|ATF7IP	-4.43328	Alcohoic_related
GO Biological Processes	19	GO:0035019	somatic stem cell population maintenance	-6.38583	21.0514	10.743	22539	73	88	6	6.81818	2.68694	5436|5440|5441|6299|6659|9079	POLR2G|POLR2K|POLR2L|SALL1|SOX4|LDB2	-4.35731	Alcohoic_related
GO Biological Processes	19	GO:2001251	negative regulation of chromosome organization	-6.27224	14.5762	9.45221	22539	123	88	7	7.95455	2.88448	142|672|3159|5252|6830|9232|9319	PARP1|BRCA1|HMGA1|PHF1|SUPT6H|PTTG1|TRIP13	-4.26192	Alcohoic_related
GO Biological Processes	19	GO:1901216	positive regulation of neuron death	-6.21395	19.7019	10.3586	22539	78	88	6	6.81818	2.68694	142|1616|1958|2353|4605|5309	PARP1|DAXX|EGR1|FOS|MYBL2|PITX3	-4.21477	Alcohoic_related
GO Biological Processes	19	GO:0006270	DNA replication initiation	-6.21187	30.4911	11.9766	22539	42	88	5	5.68182	2.46774	4171|4172|4173|4174|4175	MCM2|MCM3|MCM4|MCM5|MCM6	-4.21477	Alcohoic_related
Canonical Pathways	11	M66	PID MYC ACTIV PATHWAY	-6.181	19.4525	10.286	22539	79	88	6	6.81818	2.68694	2023|3159|4149|4831|4869|10856	ENO1|HMGA1|MAX|NME2|NPM1|RUVBL2	-4.19662	Alcohoic_related
GO Biological Processes	19	GO:0044728	DNA methylation or demethylation	-6.05355	18.5151	10.0084	22539	83	88	6	6.81818	2.68694	142|672|2353|10155|10919|55729	PARP1|BRCA1|FOS|TRIM28|EHMT2|ATF7IP	-4.1015	Alcohoic_related
GO Biological Processes	19	GO:0042770	signal transduction in response to DNA damage	-6.02057	13.3797	8.9985	22539	134	88	7	7.95455	2.88448	672|2305|4487|4849|4869|6659|79733	BRCA1|FOXM1|MSX1|CNOT3|NPM1|SOX4|E2F8	-4.07432	Alcohoic_related
GO Biological Processes	19	GO:0060968	regulation of gene silencing	-6.02057	13.3797	8.9985	22539	134	88	7	7.95455	2.88448	2099|3159|5436|5440|5441|5468|10155	ESR1|HMGA1|POLR2G|POLR2K|POLR2L|PPARG|TRIM28	-4.07432	Alcohoic_related
GO Biological Processes	19	GO:0045786	negative regulation of cell cycle	-6.01353	5.29352	6.83753	22539	629	88	13	14.7727	3.78249	274|580|672|2305|4149|4221|4849|4869|6659|9232|9319|10919|79733	BIN1|BARD1|BRCA1|FOXM1|MAX|MEN1|CNOT3|NPM1|SOX4|PTTG1|TRIP13|EHMT2|E2F8	-4.06919	Alcohoic_related
GO Biological Processes	19	GO:0010948	negative regulation of cell cycle process	-5.97857	7.35991	7.48572	22539	348	88	10	11.3636	3.38317	672|4149|4221|4849|4869|6659|9232|9319|10919|79733	BRCA1|MAX|MEN1|CNOT3|NPM1|SOX4|PTTG1|TRIP13|EHMT2|E2F8	-4.04183	Alcohoic_related
Reactome Gene Sets	6	R-HSA-674695	RNA Polymerase II Pre-transcription Events	-5.96222	17.8692	9.81267	22539	86	88	6	6.81818	2.68694	2960|5436|5440|5441|6830|27125	GTF2E1|POLR2G|POLR2K|POLR2L|SUPT6H|AFF4	-4.02736	Alcohoic_related
Reactome Gene Sets	6	R-HSA-1640170	Cell Cycle	-5.91466	5.18633	6.73736	22539	642	88	13	14.7727	3.78249	580|672|2305|4149|4171|4172|4173|4174|4175|4605|4869|9232|10856	BARD1|BRCA1|FOXM1|MAX|MCM2|MCM3|MCM4|MCM5|MCM6|MYBL2|NPM1|PTTG1|RUVBL2	-4.00097	Alcohoic_related
GO Biological Processes	19	GO:0072331	signal transduction by p53 class mediator	-5.91394	8.44368	7.74692	22539	273	88	9	10.2273	3.23006	580|672|2305|4487|4849|4869|6659|10919|79733	BARD1|BRCA1|FOXM1|MSX1|CNOT3|NPM1|SOX4|EHMT2|E2F8	-4.00097	Alcohoic_related
Reactome Gene Sets	6	R-HSA-453279	Mitotic G1-G1/S phases	-5.75062	12.1964	8.52654	22539	147	88	7	7.95455	2.88448	4149|4171|4172|4173|4174|4175|4605	MAX|MCM2|MCM3|MCM4|MCM5|MCM6|MYBL2	-3.86524	Alcohoic_related
Reactome Gene Sets	6	R-HSA-72165	mRNA Splicing - Minor Pathway	-5.74016	24.6274	10.6791	22539	52	88	5	5.68182	2.46774	5436|5440|5441|6628|6632	POLR2G|POLR2K|POLR2L|SNRPB|SNRPD1	-3.85644	Alcohoic_related
Canonical Pathways	11	M151	PID AR TF PATHWAY	-5.69846	24.1627	10.5695	22539	53	88	5	5.68182	2.46774	367|1958|2908|6595|10919	AR|EGR1|NR3C1|SMARCA2|EHMT2	-3.82134	Alcohoic_related
GO Biological Processes	19	GO:0006282	regulation of DNA repair	-5.6809	16.0078	9.22558	22539	96	88	6	6.81818	2.68694	142|672|2305|4862|8914|10155	PARP1|BRCA1|FOXM1|NPAS2|TIMELESS|TRIM28	-3.80705	Alcohoic_related
Reactome Gene Sets	6	R-HSA-203927	MicroRNA (miRNA) biogenesis	-5.66325	42.6875	12.7925	22539	24	88	4	4.54545	2.22047	5436|5440|5441|6895	POLR2G|POLR2K|POLR2L|TARBP2	-3.79265	Alcohoic_related
CORUM	33	CORUM:103	RNA polymerase II holoenzyme complex	-5.66325	42.6875	12.7925	22539	24	88	4	4.54545	2.22047	2960|5436|5440|5441	GTF2E1|POLR2G|POLR2K|POLR2L	-3.79265	Alcohoic_related
GO Biological Processes	19	GO:0043903	regulation of symbiosis, encompassing mutualism through parasitism	-5.65192	9.39908	7.80161	22539	218	88	8	9.09091	3.06454	1642|3394|5436|5440|5441|6597|6895|10155	DDB1|IRF8|POLR2G|POLR2K|POLR2L|SMARCA4|TARBP2|TRIM28	-3.78293	Alcohoic_related
GO Biological Processes	19	GO:0033044	regulation of chromosome organization	-5.50698	7.53309	7.2038	22539	306	88	9	10.2273	3.23006	142|672|3159|5252|6830|9232|9319|10155|10856	PARP1|BRCA1|HMGA1|PHF1|SUPT6H|PTTG1|TRIP13|TRIM28|RUVBL2	-3.65533	Alcohoic_related
GO Biological Processes	19	GO:0034968	histone lysine methylation	-5.50219	14.9199	8.86468	22539	103	88	6	6.81818	2.68694	672|4221|5252|6830|10919|79723	BRCA1|MEN1|PHF1|SUPT6H|EHMT2|SUV39H2	-3.65362	Alcohoic_related
GO Biological Processes	19	GO:0048524	positive regulation of viral process	-5.50219	14.9199	8.86468	22539	103	88	6	6.81818	2.68694	1642|5436|5440|5441|6597|6895	DDB1|POLR2G|POLR2K|POLR2L|SMARCA4|TARBP2	-3.65362	Alcohoic_related
GO Biological Processes	19	GO:0006304	DNA modification	-5.45353	14.6357	8.768	22539	105	88	6	6.81818	2.68694	142|672|2353|10155|10919|55729	PARP1|BRCA1|FOS|TRIM28|EHMT2|ATF7IP	-3.61416	Alcohoic_related
GO Biological Processes	19	GO:0006368	transcription elongation from RNA polymerase II promoter	-5.40587	14.3621	8.67392	22539	107	88	6	6.81818	2.68694	2960|5436|5440|5441|6830|27125	GTF2E1|POLR2G|POLR2K|POLR2L|SUPT6H|AFF4	-3.57089	Alcohoic_related
GO Biological Processes	19	GO:0060260	regulation of transcription initiation from RNA polymerase II promoter	-5.38358	36.5893	11.7973	22539	28	88	4	4.54545	2.22047	2099|3394|10923|55729	ESR1|IRF8|SUB1|ATF7IP	-3.55451	Alcohoic_related
Reactome Gene Sets	6	R-HSA-69481	G2/M Checkpoints	-5.36538	10.6719	7.87778	22539	168	88	7	7.95455	2.88448	580|672|4171|4172|4173|4174|4175	BARD1|BRCA1|MCM2|MCM3|MCM4|MCM5|MCM6	-3.54503	Alcohoic_related
Reactome Gene Sets	6	R-HSA-75955	RNA Polymerase II Transcription Elongation	-5.32272	20.3274	9.61756	22539	63	88	5	5.68182	2.46774	5436|5440|5441|6830|27125	POLR2G|POLR2K|POLR2L|SUPT6H|AFF4	-3.50808	Alcohoic_related
Reactome Gene Sets	6	R-HSA-112382	Formation of RNA Pol II elongation complex	-5.32272	20.3274	9.61756	22539	63	88	5	5.68182	2.46774	5436|5440|5441|6830|27125	POLR2G|POLR2K|POLR2L|SUPT6H|AFF4	-3.50808	Alcohoic_related
GO Biological Processes	19	GO:0040029	regulation of gene expression, epigenetic	-5.29865	5.49196	6.44329	22539	513	88	11	12.5	3.52548	672|2099|3159|5252|5436|5440|5441|5468|6830|6895|10155	BRCA1|ESR1|HMGA1|PHF1|POLR2G|POLR2K|POLR2L|PPARG|SUPT6H|TARBP2|TRIM28	-3.48825	Alcohoic_related
GO Biological Processes	19	GO:0046782	regulation of viral transcription	-5.28872	20.0098	9.5345	22539	64	88	5	5.68182	2.46774	5436|5440|5441|6597|6895	POLR2G|POLR2K|POLR2L|SMARCA4|TARBP2	-3.48252	Alcohoic_related
GO Biological Processes	19	GO:0008213	protein alkylation	-5.24861	10.245	7.68657	22539	175	88	7	7.95455	2.88448	672|4221|5252|6628|6830|10919|79723	BRCA1|MEN1|PHF1|SNRPB|SUPT6H|EHMT2|SUV39H2	-3.44931	Alcohoic_related
GO Biological Processes	19	GO:0006479	protein methylation	-5.24861	10.245	7.68657	22539	175	88	7	7.95455	2.88448	672|4221|5252|6628|6830|10919|79723	BRCA1|MEN1|PHF1|SNRPB|SUPT6H|EHMT2|SUV39H2	-3.44931	Alcohoic_related
GO Biological Processes	19	GO:1901699	cellular response to nitrogen compound	-5.22458	4.88633	6.18906	22539	629	88	12	13.6364	3.65825	142|672|1616|1958|2099|4149|4221|4869|5468|6895|8914|57761	PARP1|BRCA1|DAXX|EGR1|ESR1|MAX|MEN1|NPM1|PPARG|TARBP2|TIMELESS|TRIB3	-3.43208	Alcohoic_related
GO Biological Processes	19	GO:0018022	peptidyl-lysine methylation	-5.20271	13.2478	8.27986	22539	116	88	6	6.81818	2.68694	672|4221|5252|6830|10919|79723	BRCA1|MEN1|PHF1|SUPT6H|EHMT2|SUV39H2	-3.41557	Alcohoic_related
GO Biological Processes	19	GO:0034728	nucleosome organization	-5.20013	10.0723	7.60789	22539	178	88	7	7.95455	2.88448	1616|3159|4171|4869|6597|6604|6830	DAXX|HMGA1|MCM2|NPM1|SMARCA4|SMARCD3|SUPT6H	-3.41432	Alcohoic_related
GO Biological Processes	19	GO:0061180	mammary gland epithelium development	-5.19006	19.1138	9.29624	22539	67	88	5	5.68182	2.46774	367|2099|2294|4487|6239	AR|ESR1|FOXF1|MSX1|RREB1	-3.4069	Alcohoic_related
GO Biological Processes	19	GO:0007050	cell cycle arrest	-5.18732	8.13095	7.12694	22539	252	88	8	9.09091	3.06454	274|580|672|2305|4849|4869|6659|79733	BIN1|BARD1|BRCA1|FOXM1|CNOT3|NPM1|SOX4|E2F8	-3.40548	Alcohoic_related
CORUM	33	CORUM:238	SWI-SNF chromatin remodeling-related-BRCA1 complex	-5.16967	76.8375	15.0174	22539	10	88	3	3.40909	1.9344	672|6595|6597	BRCA1|SMARCA2|SMARCA4	-3.39396	Alcohoic_related
GO Biological Processes	19	GO:2001020	regulation of response to DNA damage stimulus	-5.16831	9.96042	7.55648	22539	180	88	7	7.95455	2.88448	142|672|2305|4487|4862|8914|10155	PARP1|BRCA1|FOXM1|MSX1|NPAS2|TIMELESS|TRIM28	-3.39396	Alcohoic_related
GO Biological Processes	19	GO:0045727	positive regulation of translation	-5.15989	13.0233	8.1982	22539	118	88	6	6.81818	2.68694	2099|4869|5436|5468|6659|6895	ESR1|NPM1|POLR2G|PPARG|SOX4|TARBP2	-3.38806	Alcohoic_related
Reactome Gene Sets	6	R-HSA-6796648	TP53 Regulates Transcription of DNA Repair Genes	-5.15822	18.8327	9.22024	22539	68	88	5	5.68182	2.46774	672|2353|5436|5440|5441	BRCA1|FOS|POLR2G|POLR2K|POLR2L	-3.38806	Alcohoic_related
Reactome Gene Sets	6	R-HSA-68867	Assembly of the pre-replicative complex	-5.15822	18.8327	9.22024	22539	68	88	5	5.68182	2.46774	4171|4172|4173|4174|4175	MCM2|MCM3|MCM4|MCM5|MCM6	-3.38806	Alcohoic_related
Reactome Gene Sets	6	R-HSA-69052	Switching of origins to a post-replicative state	-5.06564	18.037	9.00162	22539	71	88	5	5.68182	2.46774	4171|4172|4173|4174|4175	MCM2|MCM3|MCM4|MCM5|MCM6	-3.30811	Alcohoic_related
Reactome Gene Sets	6	R-HSA-68949	Orc1 removal from chromatin	-5.06564	18.037	9.00162	22539	71	88	5	5.68182	2.46774	4171|4172|4173|4174|4175	MCM2|MCM3|MCM4|MCM5|MCM6	-3.30811	Alcohoic_related
Canonical Pathways	11	M30	PID HDAC CLASSII PATHWAY	-5.03627	30.1324	10.6428	22539	34	88	4	4.54545	2.22047	2099|2908|8625|79885	ESR1|NR3C1|RFXANK|HDAC11	-3.28588	Alcohoic_related
KEGG Pathway	24	hsa04110	Cell cycle	-5.03601	12.3931	7.96464	22539	124	88	6	6.81818	2.68694	4171|4172|4173|4174|4175|9232	MCM2|MCM3|MCM4|MCM5|MCM6|PTTG1	-3.28588	Alcohoic_related
GO Biological Processes	19	GO:0003006	developmental process involved in reproduction	-5.0208	4.66388	5.97643	22539	659	88	12	13.6364	3.65825	367|2099|4221|5468|6299|6595|6895|6943|9319|10155|27125|79733	AR|ESR1|MEN1|PPARG|SALL1|SMARCA2|TARBP2|TCF21|TRIP13|TRIM28|AFF4|E2F8	-3.27311	Alcohoic_related
Reactome Gene Sets	6	R-HSA-69300	Removal of licensing factors from origins	-5.00623	17.5428	8.86317	22539	73	88	5	5.68182	2.46774	4171|4172|4173|4174|4175	MCM2|MCM3|MCM4|MCM5|MCM6	-3.26218	Alcohoic_related
GO Biological Processes	19	GO:0080135	regulation of cellular response to stress	-4.99449	4.63575	5.94905	22539	663	88	12	13.6364	3.65825	142|672|1616|2023|2305|3159|4221|4487|4862|4869|8914|10155	PARP1|BRCA1|DAXX|ENO1|FOXM1|HMGA1|MEN1|MSX1|NPAS2|NPM1|TIMELESS|TRIM28	-3.25241	Alcohoic_related
GO Biological Processes	19	GO:0006333	chromatin assembly or disassembly	-4.98524	9.33789	7.26404	22539	192	88	7	7.95455	2.88448	1616|3159|4171|4869|6597|6604|79723	DAXX|HMGA1|MCM2|NPM1|SMARCA4|SMARCD3|SUV39H2	-3.24718	Alcohoic_related
GO Biological Processes	19	GO:0050792	regulation of viral process	-4.98524	9.33789	7.26404	22539	192	88	7	7.95455	2.88448	1642|5436|5440|5441|6597|6895|10155	DDB1|POLR2G|POLR2K|POLR2L|SMARCA4|TARBP2|TRIM28	-3.24718	Alcohoic_related
Canonical Pathways	11	M40	PID E2F PATHWAY	-4.97718	17.3057	8.79598	22539	74	88	5	5.68182	2.46774	672|4172|4605|6595|10155	BRCA1|MCM3|MYBL2|SMARCA2|TRIM28	-3.2403	Alcohoic_related
GO Biological Processes	19	GO:0016571	histone methylation	-4.957	12.0059	7.81771	22539	128	88	6	6.81818	2.68694	672|4221|5252|6830|10919|79723	BRCA1|MEN1|PHF1|SUPT6H|EHMT2|SUV39H2	-3.22484	Alcohoic_related
Reactome Gene Sets	6	R-HSA-69206	G1/S Transition	-4.93766	11.9128	7.78199	22539	129	88	6	6.81818	2.68694	4149|4171|4172|4173|4174|4175	MAX|MCM2|MCM3|MCM4|MCM5|MCM6	-3.21018	Alcohoic_related
Reactome Gene Sets	6	R-HSA-452723	Transcriptional regulation of pluripotent stem cells	-4.935	28.4583	10.3225	22539	36	88	4	4.54545	2.22047	5436|5440|5441|6299	POLR2G|POLR2K|POLR2L|SALL1	-3.20983	Alcohoic_related
Reactome Gene Sets	6	R-HSA-69304	Regulation of DNA replication	-4.92032	16.8503	8.66548	22539	76	88	5	5.68182	2.46774	4171|4172|4173|4174|4175	MCM2|MCM3|MCM4|MCM5|MCM6	-3.1986	Alcohoic_related
Reactome Gene Sets	6	R-HSA-4839726	Chromatin organization	-4.9113	7.45091	6.73856	22539	275	88	8	9.09091	3.06454	6595|6597|6604|10856|10919|55689|55729|79723	SMARCA2|SMARCA4|SMARCD3|RUVBL2|EHMT2|YEATS2|ATF7IP|SUV39H2	-3.19623	Alcohoic_related
Reactome Gene Sets	6	R-HSA-3247509	Chromatin modifying enzymes	-4.9113	7.45091	6.73856	22539	275	88	8	9.09091	3.06454	6595|6597|6604|10856|10919|55689|55729|79723	SMARCA2|SMARCA4|SMARCD3|RUVBL2|EHMT2|YEATS2|ATF7IP|SUV39H2	-3.19623	Alcohoic_related
CORUM	33	CORUM:104	RNA polymerase II core complex	-4.90889	64.0312	13.6734	22539	12	88	3	3.40909	1.9344	5436|5440|5441	POLR2G|POLR2K|POLR2L	-3.19512	Alcohoic_related
GO Biological Processes	19	GO:0016458	gene silencing	-4.89063	5.54383	6.17809	22539	462	88	10	11.3636	3.38317	2099|3159|4849|5436|5440|5441|5468|6830|6895|10155	ESR1|HMGA1|CNOT3|POLR2G|POLR2K|POLR2L|PPARG|SUPT6H|TARBP2|TRIM28	-3.18134	Alcohoic_related
GO Biological Processes	19	GO:2000142	regulation of DNA-templated transcription, initiation	-4.8866	27.6892	10.172	22539	37	88	4	4.54545	2.22047	2099|3394|10923|55729	ESR1|IRF8|SUB1|ATF7IP	-3.17953	Alcohoic_related
GO Biological Processes	19	GO:0006354	DNA-templated transcription, elongation	-4.88063	11.642	7.67717	22539	132	88	6	6.81818	2.68694	2960|5436|5440|5441|6830|27125	GTF2E1|POLR2G|POLR2K|POLR2L|SUPT6H|AFF4	-3.17467	Alcohoic_related
GO Biological Processes	19	GO:0072422	signal transduction involved in DNA damage checkpoint	-4.86505	16.4183	8.53984	22539	78	88	5	5.68182	2.46774	672|4849|4869|6659|79733	BRCA1|CNOT3|NPM1|SOX4|E2F8	-3.16458	Alcohoic_related
GO Biological Processes	19	GO:0072401	signal transduction involved in DNA integrity checkpoint	-4.86505	16.4183	8.53984	22539	78	88	5	5.68182	2.46774	672|4849|4869|6659|79733	BRCA1|CNOT3|NPM1|SOX4|E2F8	-3.16458	Alcohoic_related
GO Biological Processes	19	GO:0072395	signal transduction involved in cell cycle checkpoint	-4.83799	16.2104	8.47875	22539	79	88	5	5.68182	2.46774	672|4849|4869|6659|79733	BRCA1|CNOT3|NPM1|SOX4|E2F8	-3.14508	Alcohoic_related
GO Biological Processes	19	GO:0033146	regulation of intracellular estrogen receptor signaling pathway	-4.79389	26.2692	9.88813	22539	39	88	4	4.54545	2.22047	142|367|672|2099	PARP1|AR|BRCA1|ESR1	-3.11112	Alcohoic_related
GO Biological Processes	19	GO:0034250	positive regulation of cellular amide metabolic process	-4.77071	11.1359	7.47736	22539	138	88	6	6.81818	2.68694	2099|4869|5436|5468|6659|6895	ESR1|NPM1|POLR2G|PPARG|SOX4|TARBP2	-3.0936	Alcohoic_related
Canonical Pathways	11	M115	PID REG GR PATHWAY	-4.75895	15.6174	8.30198	22539	82	88	5	5.68182	2.46774	1958|2353|2908|6597|9970	EGR1|FOS|NR3C1|SMARCA4|NR1I3	-3.08596	Alcohoic_related
Canonical Pathways	11	M2	PID SMAD2 3NUCLEAR PATHWAY	-4.75895	15.6174	8.30198	22539	82	88	5	5.68182	2.46774	367|2099|2353|2908|4149	AR|ESR1|FOS|NR3C1|MAX	-3.08596	Alcohoic_related
Reactome Gene Sets	6	R-HSA-69242	S Phase	-4.75289	11.0558	7.44525	22539	139	88	6	6.81818	2.68694	4149|4171|4172|4173|4174|4175	MAX|MCM2|MCM3|MCM4|MCM5|MCM6	-3.08306	Alcohoic_related
GO Biological Processes	19	GO:0050434	positive regulation of viral transcription	-4.70614	24.9878	9.6248	22539	41	88	4	4.54545	2.22047	5436|5440|5441|6597	POLR2G|POLR2K|POLR2L|SMARCA4	-3.04427	Alcohoic_related
CORUM	33	CORUM:5611	Emerin complex 24	-4.69267	54.8839	12.6262	22539	14	88	3	3.40909	1.9344	4171|4173|4175	MCM2|MCM4|MCM6	-3.03378	Alcohoic_related
Reactome Gene Sets	6	R-HSA-68874	M/G1 Transition	-4.68298	15.0662	8.13429	22539	85	88	5	5.68182	2.46774	4171|4172|4173|4174|4175	MCM2|MCM3|MCM4|MCM5|MCM6	-3.02946	Alcohoic_related
Reactome Gene Sets	6	R-HSA-69002	DNA Replication Pre-Initiation	-4.68298	15.0662	8.13429	22539	85	88	5	5.68182	2.46774	4171|4172|4173|4174|4175	MCM2|MCM3|MCM4|MCM5|MCM6	-3.02946	Alcohoic_related
GO Biological Processes	19	GO:0051054	positive regulation of DNA metabolic process	-4.68048	8.37792	6.78932	22539	214	88	7	7.95455	2.88448	142|672|2305|4862|8914|10155|79733	PARP1|BRCA1|FOXM1|NPAS2|TIMELESS|TRIM28|E2F8	-3.02946	Alcohoic_related
GO Biological Processes	19	GO:0051090	regulation of DNA binding transcription factor activity	-4.6632	5.91058	6.12448	22539	390	88	9	10.2273	3.23006	367|2099|2353|4221|4869|5468|6597|8896|10346	AR|ESR1|FOS|MEN1|NPM1|PPARG|SMARCA4|BUD31|TRIM22	-3.01509	Alcohoic_related
GO Biological Processes	19	GO:0071158	positive regulation of cell cycle arrest	-4.60984	14.5526	7.97491	22539	88	88	5	5.68182	2.46774	672|4849|4869|6659|79733	BRCA1|CNOT3|NPM1|SOX4|E2F8	-2.9713	Alcohoic_related
Canonical Pathways	11	M285	PID HNF3A PATHWAY	-4.58275	23.2841	9.26317	22539	44	88	4	4.54545	2.22047	367|672|2099|2353	AR|BRCA1|ESR1|FOS	-2.95078	Alcohoic_related
GO Biological Processes	19	GO:0048754	branching morphogenesis of an epithelial tube	-4.53337	10.1102	7.05558	22539	152	88	6	6.81818	2.68694	367|2099|2294|6299|6943|8914	AR|ESR1|FOXF1|SALL1|TCF21|TIMELESS	-2.90971	Alcohoic_related
GO Biological Processes	19	GO:0048511	rhythmic process	-4.51814	6.56731	6.19959	22539	312	88	8	9.09091	3.06454	1958|2099|3131|4862|5468|5971|8914|79723	EGR1|ESR1|HLF|NPAS2|PPARG|RELB|TIMELESS|SUV39H2	-2.90083	Alcohoic_related
GO Biological Processes	19	GO:0033145	positive regulation of intracellular steroid hormone receptor signaling pathway	-4.50804	48.0234	11.7799	22539	16	88	3	3.40909	1.9344	142|367|8896	PARP1|AR|BUD31	-2.89342	Alcohoic_related
GO Biological Processes	19	GO:0060562	epithelial tube morphogenesis	-4.47886	6.48418	6.1466	22539	316	88	8	9.09091	3.06454	367|2099|2294|6299|6659|6943|8914|9968	AR|ESR1|FOXF1|SALL1|SOX4|TCF21|TIMELESS|MED12	-2.87223	Alcohoic_related
Reactome Gene Sets	6	R-HSA-73894	DNA Repair	-4.46913	6.46372	6.13349	22539	317	88	8	9.09091	3.06454	142|580|672|1642|5436|5440|5441|8914	PARP1|BARD1|BRCA1|DDB1|POLR2G|POLR2K|POLR2L|TIMELESS	-2.87189	Alcohoic_related
Reactome Gene Sets	6	R-HSA-167161	HIV Transcription Initiation	-4.46806	21.7979	8.93583	22539	47	88	4	4.54545	2.22047	2960|5436|5440|5441	GTF2E1|POLR2G|POLR2K|POLR2L	-2.87189	Alcohoic_related
Reactome Gene Sets	6	R-HSA-167162	RNA Polymerase II HIV Promoter Escape	-4.46806	21.7979	8.93583	22539	47	88	4	4.54545	2.22047	2960|5436|5440|5441	GTF2E1|POLR2G|POLR2K|POLR2L	-2.87189	Alcohoic_related
Reactome Gene Sets	6	R-HSA-75953	RNA Polymerase II Transcription Initiation	-4.46806	21.7979	8.93583	22539	47	88	4	4.54545	2.22047	2960|5436|5440|5441	GTF2E1|POLR2G|POLR2K|POLR2L	-2.87189	Alcohoic_related
Reactome Gene Sets	6	R-HSA-73776	RNA Polymerase II Promoter Escape	-4.46806	21.7979	8.93583	22539	47	88	4	4.54545	2.22047	2960|5436|5440|5441	GTF2E1|POLR2G|POLR2K|POLR2L	-2.87189	Alcohoic_related
Reactome Gene Sets	6	R-HSA-73779	RNA Polymerase II Transcription Pre-Initiation And Promoter Opening	-4.46806	21.7979	8.93583	22539	47	88	4	4.54545	2.22047	2960|5436|5440|5441	GTF2E1|POLR2G|POLR2K|POLR2L	-2.87189	Alcohoic_related
Reactome Gene Sets	6	R-HSA-76042	RNA Polymerase II Transcription Initiation And Promoter Clearance	-4.46806	21.7979	8.93583	22539	47	88	4	4.54545	2.22047	2960|5436|5440|5441	GTF2E1|POLR2G|POLR2K|POLR2L	-2.87189	Alcohoic_related
GO Biological Processes	19	GO:1905268	negative regulation of chromatin organization	-4.46806	21.7979	8.93583	22539	47	88	4	4.54545	2.22047	672|3159|5252|6830	BRCA1|HMGA1|PHF1|SUPT6H	-2.87189	Alcohoic_related
CORUM	33	CORUM:2685	RNA polymerase II (RNAPII)	-4.42494	45.1985	11.4133	22539	17	88	3	3.40909	1.9344	5436|5440|5441	POLR2G|POLR2K|POLR2L	-2.84309	Alcohoic_related
GO Biological Processes	19	GO:0031061	negative regulation of histone methylation	-4.42494	45.1985	11.4133	22539	17	88	3	3.40909	1.9344	672|5252|6830	BRCA1|PHF1|SUPT6H	-2.84309	Alcohoic_related
GO Biological Processes	19	GO:0048729	tissue morphogenesis	-4.41952	4.41595	5.47988	22539	638	88	11	12.5	3.52548	367|2099|2294|4487|6239|6299|6659|6943|8914|9968|10155	AR|ESR1|FOXF1|MSX1|RREB1|SALL1|SOX4|TCF21|TIMELESS|MED12|TRIM28	-2.83932	Alcohoic_related
GO Biological Processes	19	GO:0030855	epithelial cell differentiation	-4.39942	4.03346	5.33333	22539	762	88	12	13.6364	3.65825	367|2099|2294|4221|4831|5309|5468|6299|6659|6943|10626|79733	AR|ESR1|FOXF1|MEN1|NME2|PITX3|PPARG|SALL1|SOX4|TCF21|TRIM16|E2F8	-2.82252	Alcohoic_related
GO Biological Processes	19	GO:0048732	gland development	-4.39588	5.46238	5.7935	22539	422	88	9	10.2273	3.23006	367|2099|2294|4487|5307|6239|6299|6943|79733	AR|ESR1|FOXF1|MSX1|PITX1|RREB1|SALL1|TCF21|E2F8	-2.8198	Alcohoic_related
GO Biological Processes	19	GO:1902275	regulation of chromatin organization	-4.39318	9.54503	6.81235	22539	161	88	6	6.81818	2.68694	672|3159|5252|6830|10155|10856	BRCA1|HMGA1|PHF1|SUPT6H|TRIM28|RUVBL2	-2.81879	Alcohoic_related
GO Biological Processes	19	GO:0097327	response to antineoplastic agent	-4.38421	13.0676	7.49539	22539	98	88	5	5.68182	2.46774	672|1616|1958|2908|8914	BRCA1|DAXX|EGR1|NR3C1|TIMELESS	-2.81221	Alcohoic_related
GO Biological Processes	19	GO:0002009	morphogenesis of an epithelium	-4.38236	4.83255	5.58993	22539	530	88	10	11.3636	3.38317	367|2099|2294|6239|6299|6659|6943|8914|9968|10155	AR|ESR1|FOXF1|RREB1|SALL1|SOX4|TCF21|TIMELESS|MED12|TRIM28	-2.81167	Alcohoic_related
GO Biological Processes	19	GO:0008380	RNA splicing	-4.36416	5.41109	5.75451	22539	426	88	9	10.2273	3.23006	5436|5440|5441|6628|6632|6830|8458|8896|27332	POLR2G|POLR2K|POLR2L|SNRPB|SNRPD1|SUPT6H|TTF2|BUD31|ZNF638	-2.79458	Alcohoic_related
GO Biological Processes	19	GO:0006337	nucleosome disassembly	-4.34699	42.6875	11.0772	22539	18	88	3	3.40909	1.9344	3159|6597|6604	HMGA1|SMARCA4|SMARCD3	-2.78143	Alcohoic_related
Reactome Gene Sets	6	R-HSA-69239	Synthesis of DNA	-4.34208	12.8063	7.40784	22539	100	88	5	5.68182	2.46774	4171|4172|4173|4174|4175	MCM2|MCM3|MCM4|MCM5|MCM6	-2.77892	Alcohoic_related
GO Biological Processes	19	GO:0007093	mitotic cell cycle checkpoint	-4.33363	9.31364	6.71031	22539	165	88	6	6.81818	2.68694	672|4849|4869|6659|9319|79733	BRCA1|CNOT3|NPM1|SOX4|TRIP13|E2F8	-2.77126	Alcohoic_related
GO Biological Processes	19	GO:0051091	positive regulation of DNA binding transcription factor activity	-4.3285	7.37809	6.25837	22539	243	88	7	7.95455	2.88448	367|2099|4869|5468|6597|8896|10346	AR|ESR1|NPM1|PPARG|SMARCA4|BUD31|TRIM22	-2.76692	Alcohoic_related
GO Biological Processes	19	GO:0098781	ncRNA transcription	-4.32136	12.6795	7.36499	22539	101	88	5	5.68182	2.46774	2960|5436|5440|5441|6597	GTF2E1|POLR2G|POLR2K|POLR2L|SMARCA4	-2.76137	Alcohoic_related
GO Biological Processes	19	GO:0065004	protein-DNA complex assembly	-4.31722	7.34785	6.24164	22539	244	88	7	7.95455	2.88448	142|1616|1642|2099|4171|4869|55729	PARP1|DAXX|DDB1|ESR1|MCM2|NPM1|ATF7IP	-2.7588	Alcohoic_related
Reactome Gene Sets	6	R-HSA-8851708	Signaling by FGFR2 IIIa TM	-4.27358	40.4408	10.7676	22539	19	88	3	3.40909	1.9344	5436|5440|5441	POLR2G|POLR2K|POLR2L	-2.72758	Alcohoic_related
GO Biological Processes	19	GO:0070734	histone H3-K27 methylation	-4.27358	40.4408	10.7676	22539	19	88	3	3.40909	1.9344	5252|6830|10919	PHF1|SUPT6H|EHMT2	-2.72758	Alcohoic_related
GO Biological Processes	19	GO:0060749	mammary gland alveolus development	-4.27358	40.4408	10.7676	22539	19	88	3	3.40909	1.9344	367|2099|2294	AR|ESR1|FOXF1	-2.72758	Alcohoic_related
GO Biological Processes	19	GO:0061377	mammary gland lobule development	-4.27358	40.4408	10.7676	22539	19	88	3	3.40909	1.9344	367|2099|2294	AR|ESR1|FOXF1	-2.72758	Alcohoic_related
GO Biological Processes	19	GO:0006383	transcription by RNA polymerase III	-4.26051	19.3302	8.36431	22539	53	88	4	4.54545	2.22047	367|672|5440|5441	AR|BRCA1|POLR2K|POLR2L	-2.71907	Alcohoic_related
GO Biological Processes	19	GO:0010942	positive regulation of cell death	-4.23375	4.21132	5.27903	22539	669	88	11	12.5	3.52548	142|274|580|1616|1958|2353|4487|4605|5309|5468|6659	PARP1|BIN1|BARD1|DAXX|EGR1|FOS|MSX1|MYBL2|PITX3|PPARG|SOX4	-2.69608	Alcohoic_related
Reactome Gene Sets	6	R-HSA-6781823	Formation of TC-NER Pre-Incision Complex	-4.22838	18.9722	8.27815	22539	54	88	4	4.54545	2.22047	1642|5436|5440|5441	DDB1|POLR2G|POLR2K|POLR2L	-2.69475	Alcohoic_related
GO Biological Processes	19	GO:0010639	negative regulation of organelle organization	-4.22795	5.97376	5.81133	22539	343	88	8	9.09091	3.06454	142|672|3159|4869|5252|6830|9232|9319	PARP1|BRCA1|HMGA1|NPM1|PHF1|SUPT6H|PTTG1|TRIP13	-2.69475	Alcohoic_related
GO Biological Processes	19	GO:0032986	protein-DNA complex disassembly	-4.20423	38.4188	10.4812	22539	20	88	3	3.40909	1.9344	3159|6597|6604	HMGA1|SMARCA4|SMARCD3	-2.6813	Alcohoic_related
GO Biological Processes	19	GO:0031498	chromatin disassembly	-4.20423	38.4188	10.4812	22539	20	88	3	3.40909	1.9344	3159|6597|6604	HMGA1|SMARCA4|SMARCD3	-2.6813	Alcohoic_related
GO Biological Processes	19	GO:0060964	regulation of gene silencing by miRNA	-4.20153	11.9685	7.12008	22539	107	88	5	5.68182	2.46774	2099|5436|5440|5441|5468	ESR1|POLR2G|POLR2K|POLR2L|PPARG	-2.67933	Alcohoic_related
GO Biological Processes	19	GO:1901988	negative regulation of cell cycle phase transition	-4.19652	7.03088	6.06367	22539	255	88	7	7.95455	2.88448	672|4221|4849|4869|6659|9319|79733	BRCA1|MEN1|CNOT3|NPM1|SOX4|TRIP13|E2F8	-2.67576	Alcohoic_related
GO Biological Processes	19	GO:0051098	regulation of binding	-4.19273	5.9049	5.76471	22539	347	88	8	9.09091	3.06454	142|4221|4487|5468|6604|10155|10856|57761	PARP1|MEN1|MSX1|PPARG|SMARCD3|TRIM28|RUVBL2|TRIB3	-2.67341	Alcohoic_related
GO Biological Processes	19	GO:0043902	positive regulation of multi-organism process	-4.1915	8.78143	6.46971	22539	175	88	6	6.81818	2.68694	1642|5436|5440|5441|6597|6895	DDB1|POLR2G|POLR2K|POLR2L|SMARCA4|TARBP2	-2.6729	Alcohoic_related
KEGG Pathway	24	hsa05166	HTLV-I infection	-4.18584	7.00342	6.04802	22539	256	88	7	7.95455	2.88448	1958|2114|2353|4487|4605|5971|9232	EGR1|ETS2|FOS|MSX1|MYBL2|RELB|PTTG1	-2.6701	Alcohoic_related
Reactome Gene Sets	6	R-HSA-69306	DNA Replication	-4.18227	11.8576	7.08116	22539	108	88	5	5.68182	2.46774	4171|4172|4173|4174|4175	MCM2|MCM3|MCM4|MCM5|MCM6	-2.66867	Alcohoic_related
GO Biological Processes	19	GO:1901987	regulation of cell cycle phase transition	-4.16621	5.09983	5.5125	22539	452	88	9	10.2273	3.23006	672|1642|4221|4849|4869|6604|6659|9319|79733	BRCA1|DDB1|MEN1|CNOT3|NPM1|SMARCD3|SOX4|TRIP13|E2F8	-2.65405	Alcohoic_related
GO Biological Processes	19	GO:0060261	positive regulation of transcription initiation from RNA polymerase II promoter	-4.13851	36.5893	10.2152	22539	21	88	3	3.40909	1.9344	2099|3394|10923	ESR1|IRF8|SUB1	-2.63403	Alcohoic_related
GO Biological Processes	19	GO:0060966	regulation of gene silencing by RNA	-4.12564	11.5372	6.96741	22539	111	88	5	5.68182	2.46774	2099|5436|5440|5441|5468	ESR1|POLR2G|POLR2K|POLR2L|PPARG	-2.62325	Alcohoic_related
Reactome Gene Sets	6	R-HSA-5696398	Nucleotide Excision Repair	-4.12564	11.5372	6.96741	22539	111	88	5	5.68182	2.46774	142|1642|5436|5440|5441	PARP1|DDB1|POLR2G|POLR2K|POLR2L	-2.62325	Alcohoic_related
GO Biological Processes	19	GO:0060147	regulation of posttranscriptional gene silencing	-4.12564	11.5372	6.96741	22539	111	88	5	5.68182	2.46774	2099|5436|5440|5441|5468	ESR1|POLR2G|POLR2K|POLR2L|PPARG	-2.62325	Alcohoic_related
GO Biological Processes	19	GO:0030520	intracellular estrogen receptor signaling pathway	-4.10593	17.6638	7.95539	22539	58	88	4	4.54545	2.22047	142|367|672|2099	PARP1|AR|BRCA1|ESR1	-2.60767	Alcohoic_related
Reactome Gene Sets	6	R-HSA-72163	mRNA Splicing - Major Pathway	-4.08416	8.39754	6.29067	22539	183	88	6	6.81818	2.68694	5436|5440|5441|6628|6632|8896	POLR2G|POLR2K|POLR2L|SNRPB|SNRPD1|BUD31	-2.5909	Alcohoic_related
Canonical Pathways	11	M166	PID ATF2 PATHWAY	-4.07674	17.3644	7.87969	22539	59	88	4	4.54545	2.22047	672|2099|2353|10856	BRCA1|ESR1|FOS|RUVBL2	-2.58668	Alcohoic_related
GO Biological Processes	19	GO:0061138	morphogenesis of a branching epithelium	-4.07111	8.3519	6.26906	22539	184	88	6	6.81818	2.68694	367|2099|2294|6299|6943|8914	AR|ESR1|FOXF1|SALL1|TCF21|TIMELESS	-2.58367	Alcohoic_related
GO Biological Processes	19	GO:0048598	embryonic morphogenesis	-4.038	4.39322	5.19699	22539	583	88	10	11.3636	3.38317	367|2114|2294|4487|5307|6299|6659|6943|9968|10155	AR|ETS2|FOXF1|MSX1|PITX1|SALL1|SOX4|TCF21|MED12|TRIM28	-2.55719	Alcohoic_related
GO Biological Processes	19	GO:0006289	nucleotide-excision repair	-4.01723	10.9455	6.75249	22539	117	88	5	5.68182	2.46774	142|1642|5436|5440|5441	PARP1|DDB1|POLR2G|POLR2K|POLR2L	-2.53914	Alcohoic_related
Reactome Gene Sets	6	R-HSA-167242	Abortive elongation of HIV-1 transcript in the absence of Tat	-4.0166	33.4076	9.73524	22539	23	88	3	3.40909	1.9344	5436|5440|5441	POLR2G|POLR2K|POLR2L	-2.53914	Alcohoic_related
GO Biological Processes	19	GO:0051169	nuclear transport	-4.01602	4.87341	5.3302	22539	473	88	9	10.2273	3.23006	142|580|3159|4869|6628|6632|6659|6830|10155	PARP1|BARD1|HMGA1|NPM1|SNRPB|SNRPD1|SOX4|SUPT6H|TRIM28	-2.53914	Alcohoic_related
GO Biological Processes	19	GO:0006977	DNA damage response, signal transduction by p53 class mediator resulting in cell cycle arrest	-3.99222	16.5242	7.66332	22539	62	88	4	4.54545	2.22047	4849|4869|6659|79733	CNOT3|NPM1|SOX4|E2F8	-2.52182	Alcohoic_related
GO Biological Processes	19	GO:0090068	positive regulation of cell cycle process	-3.99158	6.51955	5.76566	22539	275	88	7	7.95455	2.88448	672|4487|4849|4869|6604|6659|79733	BRCA1|MSX1|CNOT3|NPM1|SMARCD3|SOX4|E2F8	-2.52182	Alcohoic_related
Reactome Gene Sets	6	R-HSA-1989781	PPARA activates gene expression	-3.98244	10.7616	6.6843	22539	119	88	5	5.68182	2.46774	4862|5468|6604|9968|57761	NPAS2|PPARG|SMARCD3|MED12|TRIB3	-2.51345	Alcohoic_related
Reactome Gene Sets	6	R-HSA-72172	mRNA Splicing	-3.98194	8.04581	6.12223	22539	191	88	6	6.81818	2.68694	5436|5440|5441|6628|6632|8896	POLR2G|POLR2K|POLR2L|SNRPB|SNRPD1|BUD31	-2.51345	Alcohoic_related
Reactome Gene Sets	6	R-HSA-1226099	Signaling by FGFR in disease	-3.96503	16.2619	7.59453	22539	63	88	4	4.54545	2.22047	5436|5440|5441|9208	POLR2G|POLR2K|POLR2L|LRRFIP1	-2.49973	Alcohoic_related
GO Biological Processes	19	GO:1902400	intracellular signal transduction involved in G1 DNA damage checkpoint	-3.96503	16.2619	7.59453	22539	63	88	4	4.54545	2.22047	4849|4869|6659|79733	CNOT3|NPM1|SOX4|E2F8	-2.49973	Alcohoic_related
GO Biological Processes	19	GO:0072431	signal transduction involved in mitotic G1 DNA damage checkpoint	-3.96503	16.2619	7.59453	22539	63	88	4	4.54545	2.22047	4849|4869|6659|79733	CNOT3|NPM1|SOX4|E2F8	-2.49973	Alcohoic_related
GO Biological Processes	19	GO:0060969	negative regulation of gene silencing	-3.95983	32.0156	9.51769	22539	24	88	3	3.40909	1.9344	2099|3159|5468	ESR1|HMGA1|PPARG	-2.49709	Alcohoic_related
GO Biological Processes	19	GO:0035902	response to immobilization stress	-3.95983	32.0156	9.51769	22539	24	88	3	3.40909	1.9344	2353|5309|5468	FOS|PITX3|PPARG	-2.49709	Alcohoic_related
GO Biological Processes	19	GO:1902807	negative regulation of cell cycle G1/S phase transition	-3.93144	10.4969	6.58499	22539	122	88	5	5.68182	2.46774	4221|4849|4869|6659|79733	MEN1|CNOT3|NPM1|SOX4|E2F8	-2.47556	Alcohoic_related
Reactome Gene Sets	6	R-HSA-400206	Regulation of lipid metabolism by Peroxisome proliferator-activated receptor alpha (PPARalpha)	-3.93144	10.4969	6.58499	22539	122	88	5	5.68182	2.46774	4862|5468|6604|9968|57761	NPAS2|PPARG|SMARCD3|MED12|TRIB3	-2.47556	Alcohoic_related
Reactome Gene Sets	6	R-HSA-6782210	Gap-filling DNA repair synthesis and ligation in TC-NER	-3.91199	15.7615	7.46155	22539	65	88	4	4.54545	2.22047	1642|5436|5440|5441	DDB1|POLR2G|POLR2K|POLR2L	-2.46269	Alcohoic_related
GO Biological Processes	19	GO:0072413	signal transduction involved in mitotic cell cycle checkpoint	-3.91199	15.7615	7.46155	22539	65	88	4	4.54545	2.22047	4849|4869|6659|79733	CNOT3|NPM1|SOX4|E2F8	-2.46269	Alcohoic_related
GO Biological Processes	19	GO:1902402	signal transduction involved in mitotic DNA damage checkpoint	-3.91199	15.7615	7.46155	22539	65	88	4	4.54545	2.22047	4849|4869|6659|79733	CNOT3|NPM1|SOX4|E2F8	-2.46269	Alcohoic_related
GO Biological Processes	19	GO:1902403	signal transduction involved in mitotic DNA integrity checkpoint	-3.91199	15.7615	7.46155	22539	65	88	4	4.54545	2.22047	4849|4869|6659|79733	CNOT3|NPM1|SOX4|E2F8	-2.46269	Alcohoic_related
GO Biological Processes	19	GO:0001763	morphogenesis of a branching structure	-3.90838	7.80076	6.0022	22539	197	88	6	6.81818	2.68694	367|2099|2294|6299|6943|8914	AR|ESR1|FOXF1|SALL1|TCF21|TIMELESS	-2.45989	Alcohoic_related
GO Biological Processes	19	GO:0035270	endocrine system development	-3.89819	10.3276	6.52069	22539	124	88	5	5.68182	2.46774	4221|4487|5307|6299|6659	MEN1|MSX1|PITX1|SALL1|SOX4	-2.45031	Alcohoic_related
GO Biological Processes	19	GO:0006397	mRNA processing	-3.89356	4.69476	5.18231	22539	491	88	9	10.2273	3.23006	580|5436|5440|5441|6628|6632|6830|8458|8896	BARD1|POLR2G|POLR2K|POLR2L|SNRPB|SNRPD1|SUPT6H|TTF2|BUD31	-2.44629	Alcohoic_related
Reactome Gene Sets	6	R-HSA-6782135	Dual incision in TC-NER	-3.88613	15.5227	7.39726	22539	66	88	4	4.54545	2.22047	1642|5436|5440|5441	DDB1|POLR2G|POLR2K|POLR2L	-2.44069	Alcohoic_related
Reactome Gene Sets	6	R-HSA-6803529	FGFR2 alternative splicing	-3.85352	29.5529	9.12013	22539	26	88	3	3.40909	1.9344	5436|5440|5441	POLR2G|POLR2K|POLR2L	-2.41712	Alcohoic_related
GO Biological Processes	19	GO:0060765	regulation of androgen receptor signaling pathway	-3.85352	29.5529	9.12013	22539	26	88	3	3.40909	1.9344	6597|6943|8896	SMARCA4|TCF21|BUD31	-2.41712	Alcohoic_related
GO Biological Processes	19	GO:0043900	regulation of multi-organism process	-3.8495	5.26735	5.3153	22539	389	88	8	9.09091	3.06454	1642|3394|5436|5440|5441|6597|6895|10155	DDB1|IRF8|POLR2G|POLR2K|POLR2L|SMARCA4|TARBP2|TRIM28	-2.41543	Alcohoic_related
Reactome Gene Sets	6	R-HSA-69620	Cell Cycle Checkpoints	-3.82129	6.11903	5.52175	22539	293	88	7	7.95455	2.88448	580|672|4171|4172|4173|4174|4175	BARD1|BRCA1|MCM2|MCM3|MCM4|MCM5|MCM6	-2.39426	Alcohoic_related
Reactome Gene Sets	6	R-HSA-167160	RNA Pol II CTD phosphorylation and interaction with CE during HIV infection	-3.80359	28.4583	8.93779	22539	27	88	3	3.40909	1.9344	5436|5440|5441	POLR2G|POLR2K|POLR2L	-2.38118	Alcohoic_related
Reactome Gene Sets	6	R-HSA-77075	RNA Pol II CTD phosphorylation and interaction with CE	-3.80359	28.4583	8.93779	22539	27	88	3	3.40909	1.9344	5436|5440|5441	POLR2G|POLR2K|POLR2L	-2.38118	Alcohoic_related
Canonical Pathways	11	M167	PID AP1 PATHWAY	-3.78674	14.6357	7.15346	22539	70	88	4	4.54545	2.22047	1958|2099|2353|2908	EGR1|ESR1|FOS|NR3C1	-2.37046	Alcohoic_related
GO Biological Processes	19	GO:0009301	snRNA transcription	-3.78674	14.6357	7.15346	22539	70	88	4	4.54545	2.22047	2960|5436|5440|5441	GTF2E1|POLR2G|POLR2K|POLR2L	-2.37046	Alcohoic_related
GO Biological Processes	19	GO:0042795	snRNA transcription by RNA polymerase II	-3.78674	14.6357	7.15346	22539	70	88	4	4.54545	2.22047	2960|5436|5440|5441	GTF2E1|POLR2G|POLR2K|POLR2L	-2.37046	Alcohoic_related
GO Biological Processes	19	GO:0031571	mitotic G1 DNA damage checkpoint	-3.76284	14.4296	7.09562	22539	71	88	4	4.54545	2.22047	4849|4869|6659|79733	CNOT3|NPM1|SOX4|E2F8	-2.35251	Alcohoic_related
GO Biological Processes	19	GO:0044819	mitotic G1/S transition checkpoint	-3.76284	14.4296	7.09562	22539	71	88	4	4.54545	2.22047	4849|4869|6659|79733	CNOT3|NPM1|SOX4|E2F8	-2.35251	Alcohoic_related
GO Biological Processes	19	GO:2000144	positive regulation of DNA-templated transcription, initiation	-3.7556	27.442	8.76509	22539	28	88	3	3.40909	1.9344	2099|3394|10923	ESR1|IRF8|SUB1	-2.34755	Alcohoic_related
GO Biological Processes	19	GO:0030879	mammary gland development	-3.74036	9.5569	6.21982	22539	134	88	5	5.68182	2.46774	367|2099|2294|4487|6239	AR|ESR1|FOXF1|MSX1|RREB1	-2.33543	Alcohoic_related
GO Biological Processes	19	GO:0044783	G1 DNA damage checkpoint	-3.73931	14.2292	7.03894	22539	72	88	4	4.54545	2.22047	4849|4869|6659|79733	CNOT3|NPM1|SOX4|E2F8	-2.33493	Alcohoic_related
GO Biological Processes	19	GO:0009411	response to UV	-3.7253	9.48611	6.19147	22539	135	88	5	5.68182	2.46774	142|1642|4221|4869|10856	PARP1|DDB1|MEN1|NPM1|RUVBL2	-2.32312	Alcohoic_related
GO Biological Processes	19	GO:0006283	transcription-coupled nucleotide-excision repair	-3.71612	14.0342	6.98338	22539	73	88	4	4.54545	2.22047	1642|5436|5440|5441	DDB1|POLR2G|POLR2K|POLR2L	-2.31559	Alcohoic_related
GO Biological Processes	19	GO:0061061	muscle structure development	-3.71381	4.00822	4.82968	22539	639	88	10	11.3636	3.38317	274|1958|2294|2353|3131|4487|5307|6604|6830|6943	BIN1|EGR1|FOXF1|FOS|HLF|MSX1|PITX1|SMARCD3|SUPT6H|TCF21	-2.31547	Alcohoic_related
GO Biological Processes	19	GO:0006302	double-strand break repair	-3.71294	7.18107	5.68796	22539	214	88	6	6.81818	2.68694	142|580|672|2305|8914|9319	PARP1|BARD1|BRCA1|FOXM1|TIMELESS|TRIP13	-2.31547	Alcohoic_related
Reactome Gene Sets	6	R-HSA-5601884	PIWI-interacting RNA (piRNA) biogenesis	-3.7094	26.4957	8.6012	22539	29	88	3	3.40909	1.9344	5436|5440|5441	POLR2G|POLR2K|POLR2L	-2.31538	Alcohoic_related
Canonical Pathways	11	M258	PID BARD1 PATHWAY	-3.7094	26.4957	8.6012	22539	29	88	3	3.40909	1.9344	580|672|4869	BARD1|BRCA1|NPM1	-2.31538	Alcohoic_related
GO Biological Processes	19	GO:0051567	histone H3-K9 methylation	-3.7094	26.4957	8.6012	22539	29	88	3	3.40909	1.9344	672|10919|79723	BRCA1|EHMT2|SUV39H2	-2.31538	Alcohoic_related
Reactome Gene Sets	6	R-HSA-72086	mRNA Capping	-3.7094	26.4957	8.6012	22539	29	88	3	3.40909	1.9344	5436|5440|5441	POLR2G|POLR2K|POLR2L	-2.31538	Alcohoic_related
Reactome Gene Sets	6	R-HSA-6807505	RNA polymerase II transcribes snRNA genes	-3.69328	13.8446	6.9289	22539	74	88	4	4.54545	2.22047	2960|5436|5440|5441	GTF2E1|POLR2G|POLR2K|POLR2L	-2.30033	Alcohoic_related
Reactome Gene Sets	6	R-HSA-167172	Transcription of the HIV genome	-3.67076	13.66	6.87546	22539	75	88	4	4.54545	2.22047	2960|5436|5440|5441	GTF2E1|POLR2G|POLR2K|POLR2L	-2.28316	Alcohoic_related
GO Biological Processes	19	GO:2000758	positive regulation of peptidyl-lysine acetylation	-3.66487	25.6125	8.44538	22539	30	88	3	3.40909	1.9344	672|6659|10856	BRCA1|SOX4|RUVBL2	-2.2778	Alcohoic_related
GO Biological Processes	19	GO:0000075	cell cycle checkpoint	-3.65879	7.01712	5.60203	22539	219	88	6	6.81818	2.68694	672|4849|4869|6659|9319|79733	BRCA1|CNOT3|NPM1|SOX4|TRIP13|E2F8	-2.27224	Alcohoic_related
GO Biological Processes	19	GO:0034644	cellular response to UV	-3.64857	13.4803	6.82304	22539	76	88	4	4.54545	2.22047	142|1642|4869|10856	PARP1|DDB1|NPM1|RUVBL2	-2.26446	Alcohoic_related
GO Biological Processes	19	GO:1901990	regulation of mitotic cell cycle phase transition	-3.64424	4.91367	5.05035	22539	417	88	8	9.09091	3.06454	672|1642|4849|4869|6604|6659|9319|79733	BRCA1|DDB1|CNOT3|NPM1|SMARCD3|SOX4|TRIP13|E2F8	-2.26139	Alcohoic_related
GO Biological Processes	19	GO:0003401	axis elongation	-3.62189	24.7863	8.29698	22539	31	88	3	3.40909	1.9344	2099|9968|10155	ESR1|MED12|TRIM28	-2.2455	Alcohoic_related
GO Biological Processes	19	GO:0070997	neuron death	-3.62057	5.67366	5.23818	22539	316	88	7	7.95455	2.88448	142|1616|1958|2353|4149|4605|5309	PARP1|DAXX|EGR1|FOS|MAX|MYBL2|PITX3	-2.2455	Alcohoic_related
GO Biological Processes	19	GO:0045930	negative regulation of mitotic cell cycle	-3.62057	5.67366	5.23818	22539	316	88	7	7.95455	2.88448	672|4849|4869|6659|9232|9319|79733	BRCA1|CNOT3|NPM1|SOX4|PTTG1|TRIP13|E2F8	-2.2455	Alcohoic_related
GO Biological Processes	19	GO:0001655	urogenital system development	-3.61224	5.65576	5.22648	22539	317	88	7	7.95455	2.88448	367|1958|2099|2294|6299|6659|6943	AR|EGR1|ESR1|FOXF1|SALL1|SOX4|TCF21	-2.23925	Alcohoic_related
Reactome Gene Sets	6	R-HSA-69278	Cell Cycle, Mitotic	-3.60997	4.30061	4.84191	22539	536	88	9	10.2273	3.23006	2305|4149|4171|4172|4173|4174|4175|4605|9232	FOXM1|MAX|MCM2|MCM3|MCM4|MCM5|MCM6|MYBL2|PTTG1	-2.23749	Alcohoic_related
Reactome Gene Sets	6	R-HSA-6781827	Transcription-Coupled Nucleotide Excision Repair (TC-NER)	-3.58384	12.9684	6.67151	22539	79	88	4	4.54545	2.22047	1642|5436|5440|5441	DDB1|POLR2G|POLR2K|POLR2L	-2.21646	Alcohoic_related
KEGG Pathway	24	hsa03020	RNA polymerase	-3.58036	24.0117	8.15542	22539	32	88	3	3.40909	1.9344	5436|5440|5441	POLR2G|POLR2K|POLR2L	-2.2135	Alcohoic_related
GO Biological Processes	19	GO:0071363	cellular response to growth factor stimulus	-3.56481	3.83996	4.66135	22539	667	88	10	11.3636	3.38317	142|1958|2353|2908|4221|4487|5309|5436|5440|5441	PARP1|EGR1|FOS|NR3C1|MEN1|MSX1|PITX3|POLR2G|POLR2K|POLR2L	-2.20298	Alcohoic_related
Canonical Pathways	11	M223	PID BETA CATENIN NUC PATHWAY	-3.56285	12.8063	6.62282	22539	80	88	4	4.54545	2.22047	367|6597|9968|10856	AR|SMARCA4|MED12|RUVBL2	-2.20152	Alcohoic_related
GO Biological Processes	19	GO:0048608	reproductive structure development	-3.5545	4.76512	4.93525	22539	430	88	8	9.09091	3.06454	367|2099|4221|5468|6299|6943|10155|79733	AR|ESR1|MEN1|PPARG|SALL1|TCF21|TRIM28|E2F8	-2.19516	Alcohoic_related
GO Biological Processes	19	GO:0006370	7-methylguanosine mRNA capping	-3.5402	23.2841	8.02018	22539	33	88	3	3.40909	1.9344	5436|5440|5441	POLR2G|POLR2K|POLR2L	-2.18565	Alcohoic_related
Reactome Gene Sets	6	R-HSA-167158	Formation of the HIV-1 Early Elongation Complex	-3.5402	23.2841	8.02018	22539	33	88	3	3.40909	1.9344	5436|5440|5441	POLR2G|POLR2K|POLR2L	-2.18565	Alcohoic_related
GO Biological Processes	19	GO:0033144	negative regulation of intracellular steroid hormone receptor signaling pathway	-3.5402	23.2841	8.02018	22539	33	88	3	3.40909	1.9344	672|6597|6943	BRCA1|SMARCA4|TCF21	-2.18565	Alcohoic_related
Reactome Gene Sets	6	R-HSA-113418	Formation of the Early Elongation Complex	-3.5402	23.2841	8.02018	22539	33	88	3	3.40909	1.9344	5436|5440|5441	POLR2G|POLR2K|POLR2L	-2.18565	Alcohoic_related
Reactome Gene Sets	6	R-HSA-1839126	FGFR2 mutant receptor activation	-3.5402	23.2841	8.02018	22539	33	88	3	3.40909	1.9344	5436|5440|5441	POLR2G|POLR2K|POLR2L	-2.18565	Alcohoic_related
GO Biological Processes	19	GO:0006356	regulation of transcription by RNA polymerase I	-3.5402	23.2841	8.02018	22539	33	88	3	3.40909	1.9344	5440|5441|6597	POLR2K|POLR2L|SMARCA4	-2.18565	Alcohoic_related
GO Biological Processes	19	GO:0061458	reproductive system development	-3.53425	4.7321	4.90934	22539	433	88	8	9.09091	3.06454	367|2099|4221|5468|6299|6943|10155|79733	AR|ESR1|MEN1|PPARG|SALL1|TCF21|TRIM28|E2F8	-2.18182	Alcohoic_related
GO Biological Processes	19	GO:0045926	negative regulation of growth	-3.51436	6.59549	5.3751	22539	233	88	6	6.81818	2.68694	2023|3394|4487|5468|6595|6597	ENO1|IRF8|MSX1|PPARG|SMARCA2|SMARCA4	-2.16631	Alcohoic_related
Reactome Gene Sets	6	R-HSA-162906	HIV Infection	-3.50443	6.56731	5.35961	22539	234	88	6	6.81818	2.68694	2960|3159|4869|5436|5440|5441	GTF2E1|HMGA1|NPM1|POLR2G|POLR2K|POLR2L	-2.16024	Alcohoic_related
GO Biological Processes	19	GO:0036260	RNA capping	-3.5013	22.5993	7.89078	22539	34	88	3	3.40909	1.9344	5436|5440|5441	POLR2G|POLR2K|POLR2L	-2.15903	Alcohoic_related
GO Biological Processes	19	GO:0009452	7-methylguanosine RNA capping	-3.5013	22.5993	7.89078	22539	34	88	3	3.40909	1.9344	5436|5440|5441	POLR2G|POLR2K|POLR2L	-2.15903	Alcohoic_related
GO Biological Processes	19	GO:1901991	negative regulation of mitotic cell cycle phase transition	-3.49454	6.53936	5.34421	22539	235	88	6	6.81818	2.68694	672|4849|4869|6659|9319|79733	BRCA1|CNOT3|NPM1|SOX4|TRIP13|E2F8	-2.1537	Alcohoic_related
GO Biological Processes	19	GO:0009314	response to radiation	-3.48767	4.65682	4.84981	22539	440	88	8	9.09091	3.06454	142|672|1642|1958|2353|4221|4869|10856	PARP1|BRCA1|DDB1|EGR1|FOS|MEN1|NPM1|RUVBL2	-2.14731	Alcohoic_related
Reactome Gene Sets	6	R-HSA-381340	Transcriptional regulation of white adipocyte differentiation	-3.48165	12.1964	6.43641	22539	84	88	4	4.54545	2.22047	5468|6604|9968|27332	PPARG|SMARCD3|MED12|ZNF638	-2.14461	Alcohoic_related
Canonical Pathways	11	M195	PID CMYB PATHWAY	-3.48165	12.1964	6.43641	22539	84	88	4	4.54545	2.22047	2114|4173|6595|10155	ETS2|MCM4|SMARCA2|TRIM28	-2.14461	Alcohoic_related
Reactome Gene Sets	6	R-HSA-162587	HIV Life Cycle	-3.47349	8.3701	5.7268	22539	153	88	5	5.68182	2.46774	2960|3159|5436|5440|5441	GTF2E1|HMGA1|POLR2G|POLR2K|POLR2L	-2.13741	Alcohoic_related
Reactome Gene Sets	6	R-HSA-8953750	Transcriptional Regulation by E2F6	-3.46361	21.9536	7.76682	22539	35	88	3	3.40909	1.9344	672|4149|10919	BRCA1|MAX|EHMT2	-2.13072	Alcohoic_related
GO Biological Processes	19	GO:0048566	embryonic digestive tract development	-3.46361	21.9536	7.76682	22539	35	88	3	3.40909	1.9344	2294|6299|6943	FOXF1|SALL1|TCF21	-2.13072	Alcohoic_related
GO Biological Processes	19	GO:0000077	DNA damage checkpoint	-3.46048	8.31575	5.70324	22539	154	88	5	5.68182	2.46774	672|4849|4869|6659|79733	BRCA1|CNOT3|NPM1|SOX4|E2F8	-2.12954	Alcohoic_related
GO Biological Processes	19	GO:0043009	chordate embryonic development	-3.4592	4.10165	4.66184	22539	562	88	9	10.2273	3.23006	367|672|2294|4487|4849|6659|9968|10155|79733	AR|BRCA1|FOXF1|MSX1|CNOT3|SOX4|MED12|TRIM28|E2F8	-2.12872	Alcohoic_related
GO Biological Processes	19	GO:0070848	response to growth factor	-3.42851	3.69056	4.50742	22539	694	88	10	11.3636	3.38317	142|1958|2353|2908|4221|4487|5309|5436|5440|5441	PARP1|EGR1|FOS|NR3C1|MEN1|MSX1|PITX3|POLR2G|POLR2K|POLR2L	-2.10404	Alcohoic_related
Reactome Gene Sets	6	R-HSA-167238	Pausing and recovery of Tat-mediated HIV elongation	-3.42705	21.3438	7.64792	22539	36	88	3	3.40909	1.9344	5436|5440|5441	POLR2G|POLR2K|POLR2L	-2.10396	Alcohoic_related
Reactome Gene Sets	6	R-HSA-167243	Tat-mediated HIV elongation arrest and recovery	-3.42705	21.3438	7.64792	22539	36	88	3	3.40909	1.9344	5436|5440|5441	POLR2G|POLR2K|POLR2L	-2.10396	Alcohoic_related
GO Biological Processes	19	GO:0016073	snRNA metabolic process	-3.42345	11.7759	6.30471	22539	87	88	4	4.54545	2.22047	2960|5436|5440|5441	GTF2E1|POLR2G|POLR2K|POLR2L	-2.10082	Alcohoic_related
Reactome Gene Sets	6	R-HSA-72203	Processing of Capped Intron-Containing Pre-mRNA	-3.41716	6.32407	5.22414	22539	243	88	6	6.81818	2.68694	5436|5440|5441|6628|6632|8896	POLR2G|POLR2K|POLR2L|SNRPB|SNRPD1|BUD31	-2.09589	Alcohoic_related
GO Biological Processes	19	GO:0030308	negative regulation of cell growth	-3.39681	8.05425	5.58856	22539	159	88	5	5.68182	2.46774	2023|4487|5468|6595|6597	ENO1|MSX1|PPARG|SMARCA2|SMARCA4	-2.0809	Alcohoic_related
GO Biological Processes	19	GO:0018394	peptidyl-lysine acetylation	-3.37197	7.95419	5.54409	22539	161	88	5	5.68182	2.46774	672|6659|10626|10856|55689	BRCA1|SOX4|TRIM16|RUVBL2|YEATS2	-2.06328	Alcohoic_related
GO Biological Processes	19	GO:1905269	positive regulation of chromatin organization	-3.36739	11.3833	6.17932	22539	90	88	4	4.54545	2.22047	672|5252|10155|10856	BRCA1|PHF1|TRIM28|RUVBL2	-2.06041	Alcohoic_related
GO Biological Processes	19	GO:0009792	embryo development ending in birth or egg hatching	-3.35984	3.97435	4.54341	22539	580	88	9	10.2273	3.23006	367|672|2294|4487|4849|6659|9968|10155|79733	AR|BRCA1|FOXF1|MSX1|CNOT3|SOX4|MED12|TRIM28|E2F8	-2.05539	Alcohoic_related
Reactome Gene Sets	6	R-HSA-8939243	RUNX1 interacts with co-factors whose precise effect on RUNX1 targets is not known	-3.35705	20.2204	7.42394	22539	38	88	3	3.40909	1.9344	6595|6597|6604	SMARCA2|SMARCA4|SMARCD3	-2.05539	Alcohoic_related
GO Biological Processes	19	GO:0031057	negative regulation of histone modification	-3.35705	20.2204	7.42394	22539	38	88	3	3.40909	1.9344	672|5252|6830	BRCA1|PHF1|SUPT6H	-2.05539	Alcohoic_related
Reactome Gene Sets	6	R-HSA-8864260	Transcriptional regulation by the AP-2 (TFAP2) family of transcription factors	-3.35705	20.2204	7.42394	22539	38	88	3	3.40909	1.9344	2099|4605|4869	ESR1|MYBL2|NPM1	-2.05539	Alcohoic_related
GO Biological Processes	19	GO:1901985	positive regulation of protein acetylation	-3.35705	20.2204	7.42394	22539	38	88	3	3.40909	1.9344	672|6659|10856	BRCA1|SOX4|RUVBL2	-2.05539	Alcohoic_related
Reactome Gene Sets	6	R-HSA-167287	HIV elongation arrest and recovery	-3.35705	20.2204	7.42394	22539	38	88	3	3.40909	1.9344	5436|5440|5441	POLR2G|POLR2K|POLR2L	-2.05539	Alcohoic_related
Reactome Gene Sets	6	R-HSA-167290	Pausing and recovery of HIV elongation	-3.35705	20.2204	7.42394	22539	38	88	3	3.40909	1.9344	5436|5440|5441	POLR2G|POLR2K|POLR2L	-2.05539	Alcohoic_related
GO Biological Processes	19	GO:0042769	DNA damage response, detection of DNA damage	-3.35705	20.2204	7.42394	22539	38	88	3	3.40909	1.9344	142|1642|6659	PARP1|DDB1|SOX4	-2.05539	Alcohoic_related
GO Biological Processes	19	GO:0031570	DNA integrity checkpoint	-3.34747	7.8566	5.50037	22539	163	88	5	5.68182	2.46774	672|4849|4869|6659|79733	BRCA1|CNOT3|NPM1|SOX4|E2F8	-2.0477	Alcohoic_related
GO Biological Processes	19	GO:0007519	skeletal muscle tissue development	-3.34747	7.8566	5.50037	22539	163	88	5	5.68182	2.46774	1958|2353|3131|5307|6943	EGR1|FOS|HLF|PITX1|TCF21	-2.0477	Alcohoic_related
GO Biological Processes	19	GO:0061614	pri-miRNA transcription by RNA polymerase II	-3.32352	19.7019	7.31827	22539	39	88	3	3.40909	1.9344	2353|5468|6597	FOS|PPARG|SMARCA4	-2.03048	Alcohoic_related
GO Biological Processes	19	GO:0046825	regulation of protein export from nucleus	-3.32352	19.7019	7.31827	22539	39	88	3	3.40909	1.9344	580|6659|6830	BARD1|SOX4|SUPT6H	-2.03048	Alcohoic_related
GO Biological Processes	19	GO:0006913	nucleocytoplasmic transport	-3.30389	4.36887	4.61584	22539	469	88	8	9.09091	3.06454	142|580|4869|6628|6632|6659|6830|10155	PARP1|BARD1|NPM1|SNRPB|SNRPD1|SOX4|SUPT6H|TRIM28	-2.01341	Alcohoic_related
Canonical Pathways	11	M176	PID FOXM1 PATHWAY	-3.29088	19.2094	7.21647	22539	40	88	3	3.40909	1.9344	2099|2305|2353	ESR1|FOXM1|FOS	-2.00294	Alcohoic_related
GO Biological Processes	19	GO:0070317	negative regulation of G0 to G1 transition	-3.29088	19.2094	7.21647	22539	40	88	3	3.40909	1.9344	672|4149|10919	BRCA1|MAX|EHMT2	-2.00294	Alcohoic_related
GO Biological Processes	19	GO:0006310	DNA recombination	-3.28856	5.97957	5.02647	22539	257	88	6	6.81818	2.68694	142|580|672|6830|9319|10856	PARP1|BARD1|BRCA1|SUPT6H|TRIP13|RUVBL2	-2.00146	Alcohoic_related
GO Biological Processes	19	GO:0042063	gliogenesis	-3.28856	5.97957	5.02647	22539	257	88	6	6.81818	2.68694	274|5309|5468|6659|9968|79885	BIN1|PITX3|PPARG|SOX4|MED12|HDAC11	-2.00146	Alcohoic_related
GO Biological Processes	19	GO:0071478	cellular response to radiation	-3.26431	7.53309	5.35304	22539	170	88	5	5.68182	2.46774	142|1642|1958|4869|10856	PARP1|DDB1|EGR1|NPM1|RUVBL2	-1.98389	Alcohoic_related
GO Biological Processes	19	GO:0051099	positive regulation of binding	-3.26431	7.53309	5.35304	22539	170	88	5	5.68182	2.46774	142|4221|5468|10155|57761	PARP1|MEN1|PPARG|TRIM28|TRIB3	-1.98389	Alcohoic_related
GO Biological Processes	19	GO:0031400	negative regulation of protein modification process	-3.2643	3.85472	4.42963	22539	598	88	9	10.2273	3.23006	672|2305|4221|4869|5252|6659|6830|6895|57761	BRCA1|FOXM1|MEN1|NPM1|PHF1|SOX4|SUPT6H|TARBP2|TRIB3	-1.98389	Alcohoic_related
GO Biological Processes	19	GO:0072210	metanephric nephron development	-3.2591	18.7409	7.11829	22539	41	88	3	3.40909	1.9344	1958|6299|6943	EGR1|SALL1|TCF21	-1.98076	Alcohoic_related
GO Biological Processes	19	GO:0003197	endocardial cushion development	-3.2591	18.7409	7.11829	22539	41	88	3	3.40909	1.9344	2078|2294|4487	ERG|FOXF1|MSX1	-1.98076	Alcohoic_related
GO Biological Processes	19	GO:0060538	skeletal muscle organ development	-3.25274	7.48904	5.33268	22539	171	88	5	5.68182	2.46774	1958|2353|3131|5307|6943	EGR1|FOS|HLF|PITX1|TCF21	-1.97564	Alcohoic_related
GO Biological Processes	19	GO:0031047	gene silencing by RNA	-3.23805	4.89857	4.70776	22539	366	88	7	7.95455	2.88448	2099|4849|5436|5440|5441|5468|6895	ESR1|CNOT3|POLR2G|POLR2K|POLR2L|PPARG|TARBP2	-1.96218	Alcohoic_related
Reactome Gene Sets	6	R-HSA-168325	Viral Messenger RNA Synthesis	-3.22814	18.2946	7.02352	22539	42	88	3	3.40909	1.9344	5436|5440|5441	POLR2G|POLR2K|POLR2L	-1.9547	Alcohoic_related
GO Biological Processes	19	GO:1901652	response to peptide	-3.21423	4.23347	4.50214	22539	484	88	8	9.09091	3.06454	142|1958|4149|4221|5468|8914|10626|57761	PARP1|EGR1|MAX|MEN1|PPARG|TIMELESS|TRIM16|TRIB3	-1.94609	Alcohoic_related
GO Biological Processes	19	GO:0045787	positive regulation of cell cycle	-3.20326	4.83255	4.66007	22539	371	88	7	7.95455	2.88448	672|4487|4849|4869|6604|6659|79733	BRCA1|MSX1|CNOT3|NPM1|SMARCD3|SOX4|E2F8	-1.93672	Alcohoic_related
Reactome Gene Sets	6	R-HSA-5655253	Signaling by FGFR2 in disease	-3.19796	17.8692	6.93197	22539	43	88	3	3.40909	1.9344	5436|5440|5441	POLR2G|POLR2K|POLR2L	-1.93361	Alcohoic_related
GO Biological Processes	19	GO:0021983	pituitary gland development	-3.19796	17.8692	6.93197	22539	43	88	3	3.40909	1.9344	4487|5307|6299	MSX1|PITX1|SALL1	-1.93361	Alcohoic_related
GO Biological Processes	19	GO:0061647	histone H3-K9 modification	-3.19796	17.8692	6.93197	22539	43	88	3	3.40909	1.9344	672|10919|79723	BRCA1|EHMT2|SUV39H2	-1.93361	Alcohoic_related
GO Biological Processes	19	GO:0019083	viral transcription	-3.19604	7.27628	5.23329	22539	176	88	5	5.68182	2.46774	5436|5440|5441|6597|6895	POLR2G|POLR2K|POLR2L|SMARCA4|TARBP2	-1.93354	Alcohoic_related
GO Biological Processes	19	GO:0070316	regulation of G0 to G1 transition	-3.16851	17.4631	6.84345	22539	44	88	3	3.40909	1.9344	672|4149|10919	BRCA1|MAX|EHMT2	-1.9123	Alcohoic_related
GO Biological Processes	19	GO:0006417	regulation of translation	-3.15238	3.71794	4.29642	22539	620	88	9	10.2273	3.23006	2099|4849|4869|5436|5440|5441|5468|6659|6895	ESR1|CNOT3|NPM1|POLR2G|POLR2K|POLR2L|PPARG|SOX4|TARBP2	-1.89735	Alcohoic_related
KEGG Pathway	24	hsa05202	Transcriptional misregulation in cancer	-3.15197	7.11458	5.15654	22539	180	88	5	5.68182	2.46774	2078|4149|4221|5468|221037	ERG|MAX|MEN1|PPARG|JMJD1C	-1.89733	Alcohoic_related
GO Biological Processes	19	GO:1901654	response to ketone	-3.14113	7.07528	5.13772	22539	181	88	5	5.68182	2.46774	142|367|2353|2908|5468	PARP1|AR|FOS|NR3C1|PPARG	-1.8896	Alcohoic_related
GO Biological Processes	19	GO:0051129	negative regulation of cellular component organization	-3.12765	3.6882	4.26699	22539	625	88	9	10.2273	3.23006	142|367|672|3159|4869|5252|6830|9232|9319	PARP1|AR|BRCA1|HMGA1|NPM1|PHF1|SUPT6H|PTTG1|TRIP13	-1.87883	Alcohoic_related
KEGG Pathway	24	hsa00240	Pyrimidine metabolism	-3.11466	9.75714	5.63099	22539	105	88	4	4.54545	2.22047	4831|5436|5440|5441	NME2|POLR2G|POLR2K|POLR2L	-1.86815	Alcohoic_related
GO Biological Processes	19	GO:0045023	G0 to G1 transition	-3.1117	16.7038	6.67485	22539	46	88	3	3.40909	1.9344	672|4149|10919	BRCA1|MAX|EHMT2	-1.86596	Alcohoic_related
GO Biological Processes	19	GO:0044773	mitotic DNA damage checkpoint	-3.09924	9.66509	5.5984	22539	106	88	4	4.54545	2.22047	4849|4869|6659|79733	CNOT3|NPM1|SOX4|E2F8	-1.85681	Alcohoic_related
GO Biological Processes	19	GO:1901214	regulation of neuron death	-3.086	5.46886	4.71941	22539	281	88	6	6.81818	2.68694	142|1616|1958|2353|4605|5309	PARP1|DAXX|EGR1|FOS|MYBL2|PITX3	-1.84445	Alcohoic_related
Canonical Pathways	11	M60	PID NFAT TFPATHWAY	-3.08428	16.3484	6.59446	22539	47	88	3	3.40909	1.9344	1958|2353|5468	EGR1|FOS|PPARG	-1.8442	Alcohoic_related
Reactome Gene Sets	6	R-HSA-73762	RNA Polymerase I Transcription Initiation	-3.08428	16.3484	6.59446	22539	47	88	3	3.40909	1.9344	5440|5441|10919	POLR2K|POLR2L|EHMT2	-1.8442	Alcohoic_related
Reactome Gene Sets	6	R-HSA-1368108	BMAL1:CLOCK,NPAS2 activates circadian gene expression	-3.08428	16.3484	6.59446	22539	47	88	3	3.40909	1.9344	2908|4862|6604	NR3C1|NPAS2|SMARCD3	-1.8442	Alcohoic_related
GO Biological Processes	19	GO:0007565	female pregnancy	-3.07746	6.84826	5.02771	22539	187	88	5	5.68182	2.46774	367|2099|2353|4221|10155	AR|ESR1|FOS|MEN1|TRIM28	-1.83893	Alcohoic_related
GO Biological Processes	19	GO:0006353	DNA-templated transcription, termination	-3.06887	9.48611	5.53449	22539	108	88	4	4.54545	2.22047	5440|5441|6628|8458	POLR2K|POLR2L|SNRPB|TTF2	-1.83184	Alcohoic_related
Reactome Gene Sets	6	R-HSA-167169	HIV Transcription Elongation	-3.05747	16.0078	6.51651	22539	48	88	3	3.40909	1.9344	5436|5440|5441	POLR2G|POLR2K|POLR2L	-1.82344	Alcohoic_related
Reactome Gene Sets	6	R-HSA-167246	Tat-mediated elongation of the HIV-1 transcript	-3.05747	16.0078	6.51651	22539	48	88	3	3.40909	1.9344	5436|5440|5441	POLR2G|POLR2K|POLR2L	-1.82344	Alcohoic_related
Reactome Gene Sets	6	R-HSA-167200	Formation of HIV-1 elongation complex containing HIV-1 Tat	-3.05747	16.0078	6.51651	22539	48	88	3	3.40909	1.9344	5436|5440|5441	POLR2G|POLR2K|POLR2L	-1.82344	Alcohoic_related
GO Biological Processes	19	GO:0006473	protein acetylation	-3.05675	6.77579	4.99212	22539	189	88	5	5.68182	2.46774	672|6659|10626|10856|55689	BRCA1|SOX4|TRIM16|RUVBL2|YEATS2	-1.82309	Alcohoic_related
GO Biological Processes	19	GO:0019080	viral gene expression	-3.04649	6.74013	4.97452	22539	190	88	5	5.68182	2.46774	5436|5440|5441|6597|6895	POLR2G|POLR2K|POLR2L|SMARCA4|TARBP2	-1.8138	Alcohoic_related
Reactome Gene Sets	6	R-HSA-6791312	TP53 Regulates Transcription of Cell Cycle Genes	-3.03126	15.6811	6.44086	22539	49	88	3	3.40909	1.9344	4849|4869|79733	CNOT3|NPM1|E2F8	-1.80278	Alcohoic_related
GO Biological Processes	19	GO:1902806	regulation of cell cycle G1/S phase transition	-3.02615	6.66992	4.93968	22539	192	88	5	5.68182	2.46774	4221|4849|4869|6659|79733	MEN1|CNOT3|NPM1|SOX4|E2F8	-1.80008	Alcohoic_related
GO Biological Processes	19	GO:0044774	mitotic DNA integrity checkpoint	-3.00995	9.14732	5.41152	22539	112	88	4	4.54545	2.22047	4849|4869|6659|79733	CNOT3|NPM1|SOX4|E2F8	-1.78623	Alcohoic_related
GO Biological Processes	19	GO:0071482	cellular response to light stimulus	-3.00995	9.14732	5.41152	22539	112	88	4	4.54545	2.22047	142|1642|4869|10856	PARP1|DDB1|NPM1|RUVBL2	-1.78623	Alcohoic_related
GO Biological Processes	19	GO:0007623	circadian rhythm	-3.00606	6.60116	4.90535	22539	194	88	5	5.68182	2.46774	4862|5468|5971|8914|79723	NPAS2|PPARG|RELB|TIMELESS|SUV39H2	-1.78333	Alcohoic_related
GO Biological Processes	19	GO:0010001	glial cell differentiation	-3.00606	6.60116	4.90535	22539	194	88	5	5.68182	2.46774	274|5468|6659|9968|79885	BIN1|PPARG|SOX4|MED12|HDAC11	-1.78333	Alcohoic_related
Reactome Gene Sets	6	R-HSA-167152	Formation of HIV elongation complex in the absence of HIV Tat	-3.00561	15.3675	6.3674	22539	50	88	3	3.40909	1.9344	5436|5440|5441	POLR2G|POLR2K|POLR2L	-1.78333	Alcohoic_related
GO Biological Processes	19	GO:0051101	regulation of DNA binding	-2.98135	8.98684	5.35233	22539	114	88	4	4.54545	2.22047	142|4487|5468|10155	PARP1|MSX1|PPARG|TRIM28	-1.76414	Alcohoic_related
GO Biological Processes	19	GO:2000134	negative regulation of G1/S transition of mitotic cell cycle	-2.96726	8.9087	5.32327	22539	115	88	4	4.54545	2.22047	4849|4869|6659|79733	CNOT3|NPM1|SOX4|E2F8	-1.75076	Alcohoic_related
GO Biological Processes	19	GO:0001819	positive regulation of cytokine production	-2.96227	4.3943	4.33173	22539	408	88	7	7.95455	2.88448	672|1958|3394|5440|5441|9208|10626	BRCA1|EGR1|IRF8|POLR2K|POLR2L|LRRFIP1|TRIM16	-1.74649	Alcohoic_related
GO Biological Processes	19	GO:0071417	cellular response to organonitrogen compound	-2.95951	3.86604	4.18024	22539	530	88	8	9.09091	3.06454	142|672|1958|4149|4221|5468|8914|57761	PARP1|BRCA1|EGR1|MAX|MEN1|PPARG|TIMELESS|TRIB3	-1.74516	Alcohoic_related
GO Biological Processes	19	GO:0034248	regulation of cellular amide metabolic process	-2.94771	3.47681	4.05272	22539	663	88	9	10.2273	3.23006	2099|4849|4869|5436|5440|5441|5468|6659|6895	ESR1|CNOT3|NPM1|POLR2G|POLR2K|POLR2L|PPARG|SOX4|TARBP2	-1.73655	Alcohoic_related
GO Biological Processes	19	GO:0071214	cellular response to abiotic stimulus	-2.93956	5.1225	4.50033	22539	300	88	6	6.81818	2.68694	142|1642|1958|4869|5971|10856	PARP1|DDB1|EGR1|NPM1|RELB|RUVBL2	-1.73051	Alcohoic_related
GO Biological Processes	19	GO:0104004	cellular response to environmental stimulus	-2.93956	5.1225	4.50033	22539	300	88	6	6.81818	2.68694	142|1642|1958|4869|5971|10856	PARP1|DDB1|EGR1|NPM1|RELB|RUVBL2	-1.73051	Alcohoic_related
GO Biological Processes	19	GO:0007507	heart development	-2.92835	3.82276	4.14092	22539	536	88	8	9.09091	3.06454	2078|2294|4487|5468|6299|6604|6659|9968	ERG|FOXF1|MSX1|PPARG|SALL1|SMARCD3|SOX4|MED12	-1.72106	Alcohoic_related
GO Biological Processes	19	GO:0043434	response to peptide hormone	-2.91968	4.32018	4.27401	22539	415	88	7	7.95455	2.88448	142|1958|4149|4221|5468|10626|57761	PARP1|EGR1|MAX|MEN1|PPARG|TRIM16|TRIB3	-1.71496	Alcohoic_related
KEGG Pathway	24	hsa05169	Epstein-Barr virus infection	-2.91846	6.3085	4.75662	22539	203	88	5	5.68182	2.46774	2960|5436|5440|5441|5971	GTF2E1|POLR2G|POLR2K|POLR2L|RELB	-1.71451	Alcohoic_related
GO Biological Processes	19	GO:0009416	response to light stimulus	-2.91744	5.07178	4.46744	22539	303	88	6	6.81818	2.68694	142|1642|2353|4221|4869|10856	PARP1|DDB1|FOS|MEN1|NPM1|RUVBL2	-1.71451	Alcohoic_related
GO Biological Processes	19	GO:0010332	response to gamma radiation	-2.90822	14.2292	6.09346	22539	54	88	3	3.40909	1.9344	142|1958|4221	PARP1|EGR1|MEN1	-1.70804	Alcohoic_related
GO Biological Processes	19	GO:0007346	regulation of mitotic cell cycle	-2.90257	3.42515	3.99892	22539	673	88	9	10.2273	3.23006	672|1642|4849|4869|6604|6659|9232|9319|79733	BRCA1|DDB1|CNOT3|NPM1|SMARCD3|SOX4|PTTG1|TRIP13|E2F8	-1.70403	Alcohoic_related
GO Biological Processes	19	GO:0003231	cardiac ventricle development	-2.88546	8.46694	5.15606	22539	121	88	4	4.54545	2.22047	2294|6299|6604|6659	FOXF1|SALL1|SMARCD3|SOX4	-1.69058	Alcohoic_related
GO Biological Processes	19	GO:0043388	positive regulation of DNA binding	-2.88508	13.9705	6.02949	22539	55	88	3	3.40909	1.9344	142|5468|10155	PARP1|PPARG|TRIM28	-1.69058	Alcohoic_related
GO Biological Processes	19	GO:1903320	regulation of protein modification by small protein conjugation or removal	-2.88095	6.18659	4.69337	22539	207	88	5	5.68182	2.46774	672|1616|1958|6659|57761	BRCA1|DAXX|EGR1|SOX4|TRIB3	-1.68746	Alcohoic_related
GO Biological Processes	19	GO:0032479	regulation of type I interferon production	-2.87227	8.39754	5.12932	22539	122	88	4	4.54545	2.22047	5440|5441|5971|9208	POLR2K|POLR2L|RELB|LRRFIP1	-1.6798	Alcohoic_related
GO Biological Processes	19	GO:0022618	ribonucleoprotein complex assembly	-2.8717	6.15685	4.67782	22539	208	88	5	5.68182	2.46774	4869|6628|6632|6895|10856	NPM1|SNRPB|SNRPD1|TARBP2|RUVBL2	-1.67957	Alcohoic_related
GO Biological Processes	19	GO:0031060	regulation of histone methylation	-2.86239	13.721	5.96717	22539	56	88	3	3.40909	1.9344	672|5252|6830	BRCA1|PHF1|SUPT6H	-1.67296	Alcohoic_related
GO Biological Processes	19	GO:0032606	type I interferon production	-2.85919	8.32927	5.10288	22539	123	88	4	4.54545	2.22047	5440|5441|5971|9208	POLR2K|POLR2L|RELB|LRRFIP1	-1.67078	Alcohoic_related
GO Biological Processes	19	GO:0048568	embryonic organ development	-2.85451	4.20863	4.18583	22539	426	88	7	7.95455	2.88448	2294|4487|6299|6943|9968|10155|79733	FOXF1|MSX1|SALL1|TCF21|MED12|TRIM28|E2F8	-1.66676	Alcohoic_related
GO Biological Processes	19	GO:0017148	negative regulation of translation	-2.84869	4.19877	4.17796	22539	427	88	7	7.95455	2.88448	2099|4849|5436|5440|5441|5468|6895	ESR1|CNOT3|POLR2G|POLR2K|POLR2L|PPARG|TARBP2	-1.66195	Alcohoic_related
GO Biological Processes	19	GO:0001701	in utero embryonic development	-2.83853	4.89411	4.35044	22539	314	88	6	6.81818	2.68694	367|2294|4487|4849|10155|79733	AR|FOXF1|MSX1|CNOT3|TRIM28|E2F8	-1.65444	Alcohoic_related
GO Biological Processes	19	GO:0046822	regulation of nucleocytoplasmic transport	-2.79952	5.92882	4.55695	22539	216	88	5	5.68182	2.46774	142|580|6659|6830|10155	PARP1|BARD1|SOX4|SUPT6H|TRIM28	-1.62301	Alcohoic_related
GO Biological Processes	19	GO:0060135	maternal process involved in female pregnancy	-2.79684	13.0233	5.78939	22539	59	88	3	3.40909	1.9344	367|2099|4221	AR|ESR1|MEN1	-1.62164	Alcohoic_related
GO Biological Processes	19	GO:0044706	multi-multicellular organism process	-2.79071	5.9015	4.54227	22539	217	88	5	5.68182	2.46774	367|2099|2353|4221|10155	AR|ESR1|FOS|MEN1|TRIM28	-1.61714	Alcohoic_related
GO Biological Processes	19	GO:0000398	mRNA splicing, via spliceosome	-2.79001	4.78738	4.27878	22539	321	88	6	6.81818	2.68694	5436|5440|5441|6628|6632|8896	POLR2G|POLR2K|POLR2L|SNRPB|SNRPD1|BUD31	-1.61708	Alcohoic_related
GO Biological Processes	19	GO:0000377	RNA splicing, via transesterification reactions with bulged adenosine as nucleophile	-2.79001	4.78738	4.27878	22539	321	88	6	6.81818	2.68694	5436|5440|5441|6628|6632|8896	POLR2G|POLR2K|POLR2L|SNRPB|SNRPD1|BUD31	-1.61708	Alcohoic_related
GO Biological Processes	19	GO:0000375	RNA splicing, via transesterification reactions	-2.76961	4.74306	4.24871	22539	324	88	6	6.81818	2.68694	5436|5440|5441|6628|6632|8896	POLR2G|POLR2K|POLR2L|SNRPB|SNRPD1|BUD31	-1.60311	Alcohoic_related
GO Biological Processes	19	GO:0071826	ribonucleoprotein complex subunit organization	-2.76458	5.82102	4.49878	22539	220	88	5	5.68182	2.46774	4869|6628|6632|6895|10856	NPM1|SNRPB|SNRPD1|TARBP2|RUVBL2	-1.59935	Alcohoic_related
GO Biological Processes	19	GO:0034249	negative regulation of cellular amide metabolic process	-2.76336	4.05628	4.06274	22539	442	88	7	7.95455	2.88448	2099|4849|5436|5440|5441|5468|6895	ESR1|CNOT3|POLR2G|POLR2K|POLR2L|PPARG|TARBP2	-1.59845	Alcohoic_related
GO Biological Processes	19	GO:0051053	negative regulation of DNA metabolic process	-2.75867	7.82061	4.90161	22539	131	88	4	4.54545	2.22047	142|4221|5468|10155	PARP1|MEN1|PPARG|TRIM28	-1.59503	Alcohoic_related
GO Biological Processes	19	GO:2000756	regulation of peptidyl-lysine acetylation	-2.7551	12.5963	5.67789	22539	61	88	3	3.40909	1.9344	672|6659|10856	BRCA1|SOX4|RUVBL2	-1.59242	Alcohoic_related
GO Biological Processes	19	GO:0006360	transcription by RNA polymerase I	-2.7551	12.5963	5.67789	22539	61	88	3	3.40909	1.9344	5440|5441|6597	POLR2K|POLR2L|SMARCA4	-1.59242	Alcohoic_related
GO Biological Processes	19	GO:0003002	regionalization	-2.7361	4.67097	4.19939	22539	329	88	6	6.81818	2.68694	367|2114|2294|4487|6604|9968	AR|ETS2|FOXF1|MSX1|SMARCD3|MED12	-1.57751	Alcohoic_related
GO Biological Processes	19	GO:0031056	regulation of histone modification	-2.72272	7.64552	4.83048	22539	134	88	4	4.54545	2.22047	672|5252|6830|10856	BRCA1|PHF1|SUPT6H|RUVBL2	-1.56632	Alcohoic_related
Canonical Pathways	11	M254	PID MYC REPRESS PATHWAY	-2.71481	12.1964	5.57149	22539	63	88	3	3.40909	1.9344	672|3394|4149	BRCA1|IRF8|MAX	-1.55996	Alcohoic_related
GO Biological Processes	19	GO:0043966	histone H3 acetylation	-2.71481	12.1964	5.57149	22539	63	88	3	3.40909	1.9344	672|10626|55689	BRCA1|TRIM16|YEATS2	-1.55996	Alcohoic_related
GO Biological Processes	19	GO:0043967	histone H4 acetylation	-2.71481	12.1964	5.57149	22539	63	88	3	3.40909	1.9344	672|10626|10856	BRCA1|TRIM16|RUVBL2	-1.55996	Alcohoic_related
Reactome Gene Sets	6	R-HSA-211000	Gene Silencing by RNA	-2.71094	7.58889	4.80726	22539	135	88	4	4.54545	2.22047	5436|5440|5441|6895	POLR2G|POLR2K|POLR2L|TARBP2	-1.55702	Alcohoic_related
GO Biological Processes	19	GO:0045814	negative regulation of gene expression, epigenetic	-2.71094	7.58889	4.80726	22539	135	88	4	4.54545	2.22047	3159|5252|6830|10155	HMGA1|PHF1|SUPT6H|TRIM28	-1.55702	Alcohoic_related
GO Biological Processes	19	GO:0007178	transmembrane receptor protein serine/threonine kinase signaling pathway	-2.70974	4.61486	4.16064	22539	333	88	6	6.81818	2.68694	142|1958|2353|4221|4487|10923	PARP1|EGR1|FOS|MEN1|MSX1|SUB1	-1.55675	Alcohoic_related
GO Biological Processes	19	GO:0035195	gene silencing by miRNA	-2.7032	4.60105	4.15105	22539	334	88	6	6.81818	2.68694	2099|5436|5440|5441|5468|6895	ESR1|POLR2G|POLR2K|POLR2L|PPARG|TARBP2	-1.55207	Alcohoic_related
GO Biological Processes	19	GO:0043543	protein acylation	-2.68859	5.59225	4.37295	22539	229	88	5	5.68182	2.46774	672|6659|10626|10856|55689	BRCA1|SOX4|TRIM16|RUVBL2|YEATS2	-1.53838	Alcohoic_related
Reactome Gene Sets	6	R-HSA-5693538	Homology Directed Repair	-2.67618	7.42391	4.739	22539	138	88	4	4.54545	2.22047	142|580|672|8914	PARP1|BARD1|BRCA1|TIMELESS	-1.52947	Alcohoic_related
GO Biological Processes	19	GO:0007286	spermatid development	-2.67618	7.42391	4.739	22539	138	88	4	4.54545	2.22047	6595|6895|9319|27125	SMARCA2|TARBP2|TRIP13|AFF4	-1.52947	Alcohoic_related
Canonical Pathways	11	M8873	ST FAS SIGNALING PATHWAY	-2.67588	11.8212	5.4698	22539	65	88	3	3.40909	1.9344	142|1616|9191	PARP1|DAXX|DEDD	-1.52947	Alcohoic_related
GO Biological Processes	19	GO:0097190	apoptotic signaling pathway	-2.6757	3.48469	3.82222	22539	588	88	8	9.09091	3.06454	142|367|672|1616|2023|4487|9191|57761	PARP1|AR|BRCA1|DAXX|ENO1|MSX1|DEDD|TRIB3	-1.52947	Alcohoic_related
GO Biological Processes	19	GO:0030111	regulation of Wnt signaling pathway	-2.6709	4.53319	4.10366	22539	339	88	6	6.81818	2.68694	1958|2099|6299|6597|6659|9968	EGR1|ESR1|SALL1|SMARCA4|SOX4|MED12	-1.52618	Alcohoic_related
GO Biological Processes	19	GO:0035194	posttranscriptional gene silencing by RNA	-2.65814	4.5066	4.08496	22539	341	88	6	6.81818	2.68694	2099|5436|5440|5441|5468|6895	ESR1|POLR2G|POLR2K|POLR2L|PPARG|TARBP2	-1.51866	Alcohoic_related
Canonical Pathways	11	M255	PID HIF1 TFPATHWAY	-2.65689	11.642	5.4206	22539	66	88	3	3.40909	1.9344	2023|2353|4869	ENO1|FOS|NPM1	-1.51866	Alcohoic_related
Canonical Pathways	11	M101	PID HDAC CLASSI PATHWAY	-2.65689	11.642	5.4206	22539	66	88	3	3.40909	1.9344	4149|5468|79885	MAX|PPARG|HDAC11	-1.51866	Alcohoic_related
GO Biological Processes	19	GO:0071359	cellular response to dsRNA	-2.65689	11.642	5.4206	22539	66	88	3	3.40909	1.9344	2099|4869|6895	ESR1|NPM1|TARBP2	-1.51866	Alcohoic_related
Reactome Gene Sets	6	R-HSA-162599	Late Phase of HIV Life Cycle	-2.65347	7.31786	4.69462	22539	140	88	4	4.54545	2.22047	2960|5436|5440|5441	GTF2E1|POLR2G|POLR2K|POLR2L	-1.51657	Alcohoic_related
GO Biological Processes	19	GO:0016441	posttranscriptional gene silencing	-2.65179	4.49342	4.07566	22539	342	88	6	6.81818	2.68694	2099|5436|5440|5441|5468|6895	ESR1|POLR2G|POLR2K|POLR2L|PPARG|TARBP2	-1.51519	Alcohoic_related
GO Biological Processes	19	GO:0035690	cellular response to drug	-2.64547	4.48032	4.0664	22539	343	88	6	6.81818	2.68694	672|1616|1958|2908|4487|8914	BRCA1|DAXX|EGR1|NR3C1|MSX1|TIMELESS	-1.50976	Alcohoic_related
GO Biological Processes	19	GO:0048515	spermatid differentiation	-2.62008	7.16434	4.62967	22539	143	88	4	4.54545	2.22047	6595|6895|9319|27125	SMARCA2|TARBP2|TRIP13|AFF4	-1.48827	Alcohoic_related
Canonical Pathways	11	M105	PID TELOMERASE PATHWAY	-2.61984	11.2996	5.32533	22539	68	88	3	3.40909	1.9344	2099|2353|4149	ESR1|FOS|MAX	-1.48827	Alcohoic_related
GO Biological Processes	19	GO:1901653	cellular response to peptide	-2.60799	4.4033	4.01157	22539	349	88	6	6.81818	2.68694	142|4149|4221|5468|8914|57761	PARP1|MAX|MEN1|PPARG|TIMELESS|TRIB3	-1.47907	Alcohoic_related
GO Biological Processes	19	GO:0035914	skeletal muscle cell differentiation	-2.60175	11.1359	5.27916	22539	69	88	3	3.40909	1.9344	1958|2353|3131	EGR1|FOS|HLF	-1.47399	Alcohoic_related
GO Biological Processes	19	GO:0003007	heart morphogenesis	-2.60032	5.33594	4.22792	22539	240	88	5	5.68182	2.46774	2078|2294|4487|6604|6659	ERG|FOXF1|MSX1|SMARCD3|SOX4	-1.47286	Alcohoic_related
Reactome Gene Sets	6	R-HSA-400253	Circadian Clock	-2.58394	10.9768	5.23394	22539	70	88	3	3.40909	1.9344	2908|4862|6604	NR3C1|NPAS2|SMARCD3	-1.45968	Alcohoic_related
GO Biological Processes	19	GO:1901983	regulation of protein acetylation	-2.58394	10.9768	5.23394	22539	70	88	3	3.40909	1.9344	672|6659|10856	BRCA1|SOX4|RUVBL2	-1.45968	Alcohoic_related
Reactome Gene Sets	6	R-HSA-1834949	Cytosolic sensors of pathogen-associated DNA	-2.58394	10.9768	5.23394	22539	70	88	3	3.40909	1.9344	5440|5441|9208	POLR2K|POLR2L|LRRFIP1	-1.45968	Alcohoic_related
Reactome Gene Sets	6	R-HSA-212165	Epigenetic regulation of gene expression	-2.57677	6.96939	4.54593	22539	147	88	4	4.54545	2.22047	5252|5440|5441|10919	PHF1|POLR2K|POLR2L|EHMT2	-1.45308	Alcohoic_related
GO Biological Processes	19	GO:0010608	posttranscriptional regulation of gene expression	-2.57476	3.06533	3.60645	22539	752	88	9	10.2273	3.23006	2099|4849|4869|5436|5440|5441|5468|6659|6895	ESR1|CNOT3|NPM1|POLR2G|POLR2K|POLR2L|PPARG|SOX4|TARBP2	-1.45165	Alcohoic_related
Reactome Gene Sets	6	R-HSA-3214841	PKMTs methylate histone lysines	-2.56641	10.8222	5.18963	22539	71	88	3	3.40909	1.9344	10919|55729|79723	EHMT2|ATF7IP|SUV39H2	-1.44506	Alcohoic_related
GO Biological Processes	19	GO:0035107	appendage morphogenesis	-2.56615	6.9223	4.52549	22539	148	88	4	4.54545	2.22047	4487|5307|6299|6659	MSX1|PITX1|SALL1|SOX4	-1.44506	Alcohoic_related
GO Biological Processes	19	GO:0035108	limb morphogenesis	-2.56615	6.9223	4.52549	22539	148	88	4	4.54545	2.22047	4487|5307|6299|6659	MSX1|PITX1|SALL1|SOX4	-1.44506	Alcohoic_related
GO Biological Processes	19	GO:0016573	histone acetylation	-2.55561	6.87584	4.50523	22539	149	88	4	4.54545	2.22047	672|10626|10856|55689	BRCA1|TRIM16|RUVBL2|YEATS2	-1.43588	Alcohoic_related
GO Biological Processes	19	GO:0060485	mesenchyme development	-2.55415	5.20579	4.15253	22539	246	88	5	5.68182	2.46774	2078|2294|4487|6943|10155	ERG|FOXF1|MSX1|TCF21|TRIM28	-1.4355	Alcohoic_related
GO Biological Processes	19	GO:0032481	positive regulation of type I interferon production	-2.54914	10.6719	5.14619	22539	72	88	3	3.40909	1.9344	5440|5441|9208	POLR2K|POLR2L|LRRFIP1	-1.43234	Alcohoic_related
GO Biological Processes	19	GO:0031334	positive regulation of protein complex assembly	-2.54659	5.18472	4.1402	22539	247	88	5	5.68182	2.46774	142|1642|2099|3394|10923	PARP1|DDB1|ESR1|IRF8|SUB1	-1.43036	Alcohoic_related
GO Biological Processes	19	GO:0001890	placenta development	-2.54515	6.83	4.48516	22539	150	88	4	4.54545	2.22047	4221|5468|10155|79733	MEN1|PPARG|TRIM28|E2F8	-1.42948	Alcohoic_related
GO Biological Processes	19	GO:0010212	response to ionizing radiation	-2.54515	6.83	4.48516	22539	150	88	4	4.54545	2.22047	142|672|1958|4221	PARP1|BRCA1|EGR1|MEN1	-1.42948	Alcohoic_related
GO Biological Processes	19	GO:0001817	regulation of cytokine production	-2.53422	3.30484	3.6434	22539	620	88	8	9.09091	3.06454	672|1958|3394|5440|5441|5971|9208|10626	BRCA1|EGR1|IRF8|POLR2K|POLR2L|RELB|LRRFIP1|TRIM16	-1.41992	Alcohoic_related
Reactome Gene Sets	6	R-HSA-5654738	Signaling by FGFR2	-2.53214	10.5257	5.10359	22539	73	88	3	3.40909	1.9344	5436|5440|5441	POLR2G|POLR2K|POLR2L	-1.41874	Alcohoic_related
GO Biological Processes	19	GO:0032868	response to insulin	-2.52411	5.1225	4.10361	22539	250	88	5	5.68182	2.46774	142|1958|4149|5468|57761	PARP1|EGR1|MAX|PPARG|TRIB3	-1.41417	Alcohoic_related
GO Biological Processes	19	GO:0019216	regulation of lipid metabolic process	-2.51766	4.22184	3.87975	22539	364	88	6	6.81818	2.68694	672|1958|4862|5468|6604|57761	BRCA1|EGR1|NPAS2|PPARG|SMARCD3|TRIB3	-1.40987	Alcohoic_related
GO Biological Processes	19	GO:0003208	cardiac ventricle morphogenesis	-2.51538	10.3834	5.06181	22539	74	88	3	3.40909	1.9344	2294|6604|6659	FOXF1|SMARCD3|SOX4	-1.40815	Alcohoic_related
GO Biological Processes	19	GO:0043627	response to estrogen	-2.51538	10.3834	5.06181	22539	74	88	3	3.40909	1.9344	672|2099|5468	BRCA1|ESR1|PPARG	-1.40815	Alcohoic_related
GO Biological Processes	19	GO:0018393	internal peptidyl-lysine acetylation	-2.50409	6.6526	4.40668	22539	154	88	4	4.54545	2.22047	672|10626|10856|55689	BRCA1|TRIM16|RUVBL2|YEATS2	-1.39797	Alcohoic_related
GO Biological Processes	19	GO:0016055	Wnt signaling pathway	-2.48389	3.61467	3.68641	22539	496	88	7	7.95455	2.88448	1642|1958|2099|6299|6597|6659|9968	DDB1|EGR1|ESR1|SALL1|SMARCA4|SOX4|MED12	-1.38113	Alcohoic_related
GO Biological Processes	19	GO:0031016	pancreas development	-2.48259	10.1102	4.9806	22539	76	88	3	3.40909	1.9344	2294|4221|6659	FOXF1|MEN1|SOX4	-1.38089	Alcohoic_related
GO Biological Processes	19	GO:0021536	diencephalon development	-2.48259	10.1102	4.9806	22539	76	88	3	3.40909	1.9344	4487|5307|6299	MSX1|PITX1|SALL1	-1.38089	Alcohoic_related
GO Biological Processes	19	GO:0198738	cell-cell signaling by wnt	-2.47429	3.60015	3.67349	22539	498	88	7	7.95455	2.88448	1642|1958|2099|6299|6597|6659|9968	DDB1|EGR1|ESR1|SALL1|SMARCA4|SOX4|MED12	-1.3732	Alcohoic_related
GO Biological Processes	19	GO:2001252	positive regulation of chromosome organization	-2.47408	6.52548	4.34962	22539	157	88	4	4.54545	2.22047	672|5252|10155|10856	BRCA1|PHF1|TRIM28|RUVBL2	-1.3732	Alcohoic_related
GO Biological Processes	19	GO:0003205	cardiac chamber development	-2.46422	6.48418	4.33093	22539	158	88	4	4.54545	2.22047	2294|6299|6604|6659	FOXF1|SALL1|SMARCD3|SOX4	-1.3669	Alcohoic_related
Reactome Gene Sets	6	R-HSA-5663202	Diseases of signal transduction	-2.44863	4.0871	3.7793	22539	376	88	6	6.81818	2.68694	2099|5436|5440|5441|9208|79885	ESR1|POLR2G|POLR2K|POLR2L|LRRFIP1|HDAC11	-1.35348	Alcohoic_related
Reactome Gene Sets	6	R-HSA-5633007	Regulation of TP53 Activity	-2.44472	6.40313	4.29404	22539	160	88	4	4.54545	2.22047	580|672|1616|10919	BARD1|BRCA1|DAXX|EHMT2	-1.35145	Alcohoic_related
GO Biological Processes	19	GO:0006475	internal protein amino acid acetylation	-2.44472	6.40313	4.29404	22539	160	88	4	4.54545	2.22047	672|10626|10856|55689	BRCA1|TRIM16|RUVBL2|YEATS2	-1.35145	Alcohoic_related
GO Biological Processes	19	GO:0045815	positive regulation of gene expression, epigenetic	-2.43513	9.72627	4.86428	22539	79	88	3	3.40909	1.9344	3159|5440|5441	HMGA1|POLR2K|POLR2L	-1.3451	Alcohoic_related
Reactome Gene Sets	6	R-HSA-3214858	RMTs methylate histone arginines	-2.43513	9.72627	4.86428	22539	79	88	3	3.40909	1.9344	6595|6597|6604	SMARCA2|SMARCA4|SMARCD3	-1.3451	Alcohoic_related
GO Biological Processes	19	GO:0016567	protein ubiquitination	-2.41171	2.89589	3.4095	22539	796	88	9	10.2273	3.23006	580|672|1616|1642|6659|9968|10155|10346|57761	BARD1|BRCA1|DAXX|DDB1|SOX4|MED12|TRIM28|TRIM22|TRIB3	-1.32434	Alcohoic_related
Reactome Gene Sets	6	R-HSA-5663205	Infectious disease	-2.39863	3.99156	3.70666	22539	385	88	6	6.81818	2.68694	2960|3159|4869|5436|5440|5441	GTF2E1|HMGA1|NPM1|POLR2G|POLR2K|POLR2L	-1.31361	Alcohoic_related
GO Biological Processes	19	GO:0010565	regulation of cellular ketone metabolic process	-2.39715	6.20909	4.20449	22539	165	88	4	4.54545	2.22047	672|1958|5468|57761	BRCA1|EGR1|PPARG|TRIB3	-1.31269	Alcohoic_related
GO Biological Processes	19	GO:0009410	response to xenobiotic stimulus	-2.39562	4.77845	3.89576	22539	268	88	5	5.68182	2.46774	1958|2908|5309|5468|8856	EGR1|NR3C1|PITX3|PPARG|NR1I2	-1.31181	Alcohoic_related
GO Biological Processes	19	GO:0040008	regulation of growth	-2.39412	3.13303	3.46572	22539	654	88	8	9.09091	3.06454	367|2023|3394|4487|5468|6595|6597|10856	AR|ENO1|IRF8|MSX1|PPARG|SMARCA2|SMARCA4|RUVBL2	-1.31072	Alcohoic_related
Reactome Gene Sets	6	R-HSA-5693532	DNA Double-Strand Break Repair	-2.38783	6.17169	4.18702	22539	166	88	4	4.54545	2.22047	142|580|672|8914	PARP1|BARD1|BRCA1|TIMELESS	-1.30575	Alcohoic_related
GO Biological Processes	19	GO:0031497	chromatin assembly	-2.37858	6.13473	4.1697	22539	167	88	4	4.54545	2.22047	1616|3159|4171|4869	DAXX|HMGA1|MCM2|NPM1	-1.29702	Alcohoic_related
GO Biological Processes	19	GO:0007423	sensory organ development	-2.37641	3.45448	3.54173	22539	519	88	7	7.95455	2.88448	4149|4171|4487|5309|6299|6597|6604	MAX|MCM2|MSX1|PITX3|SALL1|SMARCA4|SMARCD3	-1.29538	Alcohoic_related
GO Biological Processes	19	GO:0031058	positive regulation of histone modification	-2.37483	9.25753	4.7185	22539	83	88	3	3.40909	1.9344	672|5252|10856	BRCA1|PHF1|RUVBL2	-1.29456	Alcohoic_related
GO Biological Processes	19	GO:0008625	extrinsic apoptotic signaling pathway via death domain receptors	-2.37483	9.25753	4.7185	22539	83	88	3	3.40909	1.9344	672|1616|9191	BRCA1|DAXX|DEDD	-1.29456	Alcohoic_related
GO Biological Processes	19	GO:0007283	spermatogenesis	-2.37188	3.44784	3.53563	22539	520	88	7	7.95455	2.88448	367|6595|6895|9191|9232|9319|27125	AR|SMARCA2|TARBP2|DEDD|PTTG1|TRIP13|AFF4	-1.29341	Alcohoic_related
GO Biological Processes	19	GO:1901655	cellular response to ketone	-2.36025	9.14732	4.68359	22539	84	88	3	3.40909	1.9344	367|2908|5468	AR|NR3C1|PPARG	-1.28365	Alcohoic_related
GO Biological Processes	19	GO:0019217	regulation of fatty acid metabolic process	-2.36025	9.14732	4.68359	22539	84	88	3	3.40909	1.9344	672|5468|57761	BRCA1|PPARG|TRIB3	-1.28365	Alcohoic_related
GO Biological Processes	19	GO:0051147	regulation of muscle cell differentiation	-2.3512	6.02647	4.11856	22539	170	88	4	4.54545	2.22047	2294|4487|6604|6830	FOXF1|MSX1|SMARCD3|SUPT6H	-1.27589	Alcohoic_related
GO Biological Processes	19	GO:0007517	muscle organ development	-2.34476	3.89051	3.62849	22539	395	88	6	6.81818	2.68694	1958|2353|3131|4487|5307|6943	EGR1|FOS|HLF|MSX1|PITX1|TCF21	-1.271	Alcohoic_related
GO Biological Processes	19	GO:0045069	regulation of viral genome replication	-2.33165	8.93459	4.61549	22539	86	88	3	3.40909	1.9344	1642|6895|10155	DDB1|TARBP2|TRIM28	-1.2597	Alcohoic_related
Reactome Gene Sets	6	R-HSA-190236	Signaling by FGFR	-2.31763	8.8319	4.58227	22539	87	88	3	3.40909	1.9344	5436|5440|5441	POLR2G|POLR2K|POLR2L	-1.24721	Alcohoic_related
GO Biological Processes	19	GO:2000045	regulation of G1/S transition of mitotic cell cycle	-2.31554	5.88793	4.05225	22539	174	88	4	4.54545	2.22047	4849|4869|6659|79733	CNOT3|NPM1|SOX4|E2F8	-1.24564	Alcohoic_related
GO Biological Processes	19	GO:0072001	renal system development	-2.30909	4.55738	3.75683	22539	281	88	5	5.68182	2.46774	1958|2294|6299|6659|6943	EGR1|FOXF1|SALL1|SOX4|TCF21	-1.24029	Alcohoic_related
KEGG Pathway	24	hsa00230	Purine metabolism	-2.30678	5.85429	4.036	22539	175	88	4	4.54545	2.22047	4831|5436|5440|5441	NME2|POLR2G|POLR2K|POLR2L	-1.23916	Alcohoic_related
GO Biological Processes	19	GO:0048736	appendage development	-2.30678	5.85429	4.036	22539	175	88	4	4.54545	2.22047	4487|5307|6299|6659	MSX1|PITX1|SALL1|SOX4	-1.23916	Alcohoic_related
GO Biological Processes	19	GO:0060173	limb development	-2.30678	5.85429	4.036	22539	175	88	4	4.54545	2.22047	4487|5307|6299|6659	MSX1|PITX1|SALL1|SOX4	-1.23916	Alcohoic_related
GO Biological Processes	19	GO:0048709	oligodendrocyte differentiation	-2.30378	8.73153	4.54957	22539	88	88	3	3.40909	1.9344	5468|9968|79885	PPARG|MED12|HDAC11	-1.23642	Alcohoic_related
GO Biological Processes	19	GO:0060333	interferon-gamma-mediated signaling pathway	-2.2901	8.63343	4.51739	22539	89	88	3	3.40909	1.9344	3394|5468|10346	IRF8|PPARG|TRIM22	-1.2256	Alcohoic_related
GO Biological Processes	19	GO:0001656	metanephros development	-2.2901	8.63343	4.51739	22539	89	88	3	3.40909	1.9344	1958|6299|6943	EGR1|SALL1|TCF21	-1.2256	Alcohoic_related
GO Biological Processes	19	GO:1901796	regulation of signal transduction by p53 class mediator	-2.28942	5.78814	4.00386	22539	177	88	4	4.54545	2.22047	580|672|4487|10919	BARD1|BRCA1|MSX1|EHMT2	-1.2256	Alcohoic_related
GO Biological Processes	19	GO:0071241	cellular response to inorganic substance	-2.28942	5.78814	4.00386	22539	177	88	4	4.54545	2.22047	142|1616|2353|8914	PARP1|DAXX|FOS|TIMELESS	-1.2256	Alcohoic_related
GO Biological Processes	19	GO:0048232	male gamete generation	-2.28787	3.3263	3.42239	22539	539	88	7	7.95455	2.88448	367|6595|6895|9191|9232|9319|27125	AR|SMARCA2|TARBP2|DEDD|PTTG1|TRIP13|AFF4	-1.2248	Alcohoic_related
GO Biological Processes	19	GO:0050673	epithelial cell proliferation	-2.28744	3.7851	3.54539	22539	406	88	6	6.81818	2.68694	367|2099|4221|4831|5468|6239	AR|ESR1|MEN1|NME2|PPARG|RREB1	-1.22463	Alcohoic_related
GO Biological Processes	19	GO:0048562	embryonic organ morphogenesis	-2.27708	4.47771	3.70564	22539	286	88	5	5.68182	2.46774	2294|4487|6299|6943|9968	FOXF1|MSX1|SALL1|TCF21|MED12	-1.21602	Alcohoic_related
GO Biological Processes	19	GO:0001816	cytokine production	-2.27465	2.99124	3.31348	22539	685	88	8	9.09091	3.06454	672|1958|3394|5440|5441|5971|9208|10626	BRCA1|EGR1|IRF8|POLR2K|POLR2L|RELB|LRRFIP1|TRIM16	-1.21534	Alcohoic_related
GO Biological Processes	19	GO:0031396	regulation of protein ubiquitination	-2.25537	5.66022	3.94104	22539	181	88	4	4.54545	2.22047	672|1616|6659|57761	BRCA1|DAXX|SOX4|TRIB3	-1.19978	Alcohoic_related
GO Biological Processes	19	GO:1905330	regulation of morphogenesis of an epithelium	-2.25537	5.66022	3.94104	22539	181	88	4	4.54545	2.22047	367|2099|6239|9968	AR|ESR1|RREB1|MED12	-1.19978	Alcohoic_related
GO Biological Processes	19	GO:0097193	intrinsic apoptotic signaling pathway	-2.25195	4.41595	3.66553	22539	290	88	5	5.68182	2.46774	142|672|2023|4487|57761	PARP1|BRCA1|ENO1|MSX1|TRIB3	-1.19686	Alcohoic_related
GO Biological Processes	19	GO:0021782	glial cell development	-2.25006	8.3519	4.4238	22539	92	88	3	3.40909	1.9344	6659|9968|79885	SOX4|MED12|HDAC11	-1.19521	Alcohoic_related
GO Biological Processes	19	GO:0016579	protein deubiquitination	-2.24574	4.40077	3.65561	22539	291	88	5	5.68182	2.46774	367|580|672|2099|3607	AR|BARD1|BRCA1|ESR1|FOXK2	-1.19139	Alcohoic_related
GO Biological Processes	19	GO:0009749	response to glucose	-2.23867	5.59836	3.91032	22539	183	88	4	4.54545	2.22047	1958|4221|6597|6659	EGR1|MEN1|SMARCA4|SOX4	-1.18505	Alcohoic_related
GO Biological Processes	19	GO:0060993	kidney morphogenesis	-2.23703	8.2621	4.39355	22539	93	88	3	3.40909	1.9344	6299|6659|6943	SALL1|SOX4|TCF21	-1.18416	Alcohoic_related
GO Biological Processes	19	GO:0043254	regulation of protein complex assembly	-2.22711	3.67644	3.45799	22539	418	88	6	6.81818	2.68694	142|1642|2099|3394|10923|55729	PARP1|DDB1|ESR1|IRF8|SUB1|ATF7IP	-1.17595	Alcohoic_related
GO Biological Processes	19	GO:0007389	pattern specification process	-2.22218	3.66766	3.45085	22539	419	88	6	6.81818	2.68694	367|2114|2294|4487|6604|9968	AR|ETS2|FOXF1|MSX1|SMARCD3|MED12	-1.17176	Alcohoic_related
GO Biological Processes	19	GO:0007568	aging	-2.21505	4.32644	3.6067	22539	296	88	5	5.68182	2.46774	2305|2353|3159|4869|5309	FOXM1|FOS|HMGA1|NPM1|PITX3	-1.16618	Alcohoic_related
Reactome Gene Sets	6	R-HSA-5688426	Deubiquitination	-2.20899	4.31187	3.59704	22539	297	88	5	5.68182	2.46774	367|580|672|2099|3607	AR|BARD1|BRCA1|ESR1|FOXK2	-1.16149	Alcohoic_related
GO Biological Processes	19	GO:0009746	response to hexose	-2.19783	5.44947	3.83548	22539	188	88	4	4.54545	2.22047	1958|4221|6597|6659	EGR1|MEN1|SMARCA4|SOX4	-1.15226	Alcohoic_related
GO Biological Processes	19	GO:0002573	myeloid leukocyte differentiation	-2.18184	5.39211	3.80629	22539	190	88	4	4.54545	2.22047	142|2353|5468|5971	PARP1|FOS|PPARG|RELB	-1.14112	Alcohoic_related
Reactome Gene Sets	6	R-HSA-5693607	Processing of DNA double-strand break ends	-2.17413	7.84056	4.24879	22539	98	88	3	3.40909	1.9344	580|672|8914	BARD1|BRCA1|TIMELESS	-1.1356	Alcohoic_related
GO Biological Processes	19	GO:0042752	regulation of circadian rhythm	-2.17413	7.84056	4.24879	22539	98	88	3	3.40909	1.9344	5468|8914|79723	PPARG|TIMELESS|SUV39H2	-1.1356	Alcohoic_related
GO Biological Processes	19	GO:0043331	response to dsRNA	-2.17413	7.84056	4.24879	22539	98	88	3	3.40909	1.9344	2099|4869|6895	ESR1|NPM1|TARBP2	-1.1356	Alcohoic_related
Reactome Gene Sets	6	R-HSA-2262752	Cellular responses to stress	-2.17371	3.58217	3.38065	22539	429	88	6	6.81818	2.68694	367|2114|2353|2908|3159|10919	AR|ETS2|FOS|NR3C1|HMGA1|EHMT2	-1.13557	Alcohoic_related
GO Biological Processes	19	GO:0071375	cellular response to peptide hormone stimulus	-2.16724	4.21258	3.53064	22539	304	88	5	5.68182	2.46774	142|4149|4221|5468|57761	PARP1|MAX|MEN1|PPARG|TRIB3	-1.13004	Alcohoic_related
GO Biological Processes	19	GO:0048762	mesenchymal cell differentiation	-2.16606	5.33594	3.77751	22539	192	88	4	4.54545	2.22047	2078|4487|6943|10155	ERG|MSX1|TCF21|TRIM28	-1.1291	Alcohoic_related
KEGG Pathway	24	hsa05016	Huntington's disease	-2.15823	5.30829	3.76327	22539	193	88	4	4.54545	2.22047	5436|5440|5441|5468	POLR2G|POLR2K|POLR2L|PPARG	-1.12199	Alcohoic_related
GO Biological Processes	19	GO:0034284	response to monosaccharide	-2.15823	5.30829	3.76327	22539	193	88	4	4.54545	2.22047	1958|4221|6597|6659	EGR1|MEN1|SMARCA4|SOX4	-1.12199	Alcohoic_related
GO Biological Processes	19	GO:0070646	protein modification by small protein removal	-2.15553	4.18505	3.51204	22539	306	88	5	5.68182	2.46774	367|580|672|2099|3607	AR|BARD1|BRCA1|ESR1|FOXK2	-1.1207	Alcohoic_related
GO Biological Processes	19	GO:0034660	ncRNA metabolic process	-2.14686	3.12893	3.23179	22539	573	88	7	7.95455	2.88448	2960|5436|5440|5441|6597|6895|57109	GTF2E1|POLR2G|POLR2K|POLR2L|SMARCA4|TARBP2|REXO4	-1.11415	Alcohoic_related
GO Biological Processes	19	GO:0051348	negative regulation of transferase activity	-2.14391	4.15787	3.49359	22539	308	88	5	5.68182	2.46774	4221|4869|5468|6895|57761	MEN1|NPM1|PPARG|TARBP2|TRIB3	-1.11198	Alcohoic_related
Reactome Gene Sets	6	R-HSA-2559583	Cellular Senescence	-2.14273	5.25385	3.73508	22539	195	88	4	4.54545	2.22047	2114|2353|3159|10919	ETS2|FOS|HMGA1|EHMT2	-1.11142	Alcohoic_related
GO Biological Processes	19	GO:0008285	negative regulation of cell proliferation	-2.131	2.82621	3.12919	22539	725	88	8	9.09091	3.06454	367|3159|4221|4487|4869|5468|6595|6659	AR|HMGA1|MEN1|MSX1|NPM1|PPARG|SMARCA2|SOX4	-1.10272	Alcohoic_related
GO Biological Processes	19	GO:0090100	positive regulation of transmembrane receptor protein serine/threonine kinase signaling pathway	-2.12633	7.53309	4.14016	22539	102	88	3	3.40909	1.9344	142|4221|4487	PARP1|MEN1|MSX1	-1.09851	Alcohoic_related
GO Biological Processes	19	GO:0014013	regulation of gliogenesis	-2.1032	7.38822	4.08804	22539	104	88	3	3.40909	1.9344	274|5309|5468	BIN1|PITX3|PPARG	-1.07815	Alcohoic_related
Reactome Gene Sets	6	R-HSA-5578749	Transcriptional regulation by small RNAs	-2.09182	7.31786	4.06249	22539	105	88	3	3.40909	1.9344	5436|5440|5441	POLR2G|POLR2K|POLR2L	-1.07113	Alcohoic_related
GO Biological Processes	19	GO:0009952	anterior/posterior pattern specification	-2.0899	5.07178	3.63939	22539	202	88	4	4.54545	2.22047	2114|2294|4487|9968	ETS2|FOXF1|MSX1|MED12	-1.06944	Alcohoic_related
Reactome Gene Sets	6	R-HSA-5250913	Positive epigenetic regulation of rRNA expression	-2.08056	7.24882	4.03728	22539	106	88	3	3.40909	1.9344	5440|5441|10919	POLR2K|POLR2L|EHMT2	-1.06215	Alcohoic_related
GO Biological Processes	19	GO:0043393	regulation of protein binding	-2.06067	4.9733	3.58668	22539	206	88	4	4.54545	2.22047	4221|6604|10856|57761	MEN1|SMARCD3|RUVBL2|TRIB3	-1.04565	Alcohoic_related
GO Biological Processes	19	GO:0060560	developmental growth involved in morphogenesis	-2.05347	4.94928	3.57372	22539	207	88	4	4.54545	2.22047	2099|6299|9968|10155	ESR1|SALL1|MED12|TRIM28	-1.0397	Alcohoic_related
Reactome Gene Sets	6	R-HSA-73854	RNA Polymerase I Promoter Clearance	-2.04748	7.04931	3.96356	22539	109	88	3	3.40909	1.9344	5440|5441|10919	POLR2K|POLR2L|EHMT2	-1.03448	Alcohoic_related
GO Biological Processes	19	GO:0007569	cell aging	-2.04748	7.04931	3.96356	22539	109	88	3	3.40909	1.9344	2305|3159|4869	FOXM1|HMGA1|NPM1	-1.03448	Alcohoic_related
GO Biological Processes	19	GO:1905114	cell surface receptor signaling pathway involved in cell-cell signaling	-2.03889	2.98315	3.08515	22539	601	88	7	7.95455	2.88448	1642|1958|2099|6299|6597|6659|9968	DDB1|EGR1|ESR1|SALL1|SMARCA4|SOX4|MED12	-1.02768	Alcohoic_related
GO Biological Processes	19	GO:0006323	DNA packaging	-2.0321	4.87857	3.53531	22539	210	88	4	4.54545	2.22047	1616|3159|4171|4869	DAXX|HMGA1|MCM2|NPM1	-1.02245	Alcohoic_related
Reactome Gene Sets	6	R-HSA-73864	RNA Polymerase I Transcription	-2.01541	6.86049	3.89259	22539	112	88	3	3.40909	1.9344	5440|5441|10919	POLR2K|POLR2L|EHMT2	-1.00797	Alcohoic_related
GO Biological Processes	19	GO:0071897	DNA biosynthetic process	-2.0111	4.80986	3.49763	22539	213	88	4	4.54545	2.22047	580|672|4221|5468	BARD1|BRCA1|MEN1|PPARG	-1.0041	Alcohoic_related
GO Biological Processes	19	GO:0019079	viral genome replication	-2.00493	6.79978	3.86951	22539	113	88	3	3.40909	1.9344	1642|6895|10155	DDB1|TARBP2|TRIM28	-0.998822	Alcohoic_related
GO Biological Processes	19	GO:0009743	response to carbohydrate	-2.00417	4.78738	3.48523	22539	214	88	4	4.54545	2.22047	1958|4221|6597|6659	EGR1|MEN1|SMARCA4|SOX4	-0.998722	Alcohoic_related
GO Biological Processes	19	GO:0008406	gonad development	-2.00417	4.78738	3.48523	22539	214	88	4	4.54545	2.22047	367|2099|6299|6943	AR|ESR1|SALL1|TCF21	-0.998722	Alcohoic_related
GO Biological Processes	19	GO:0022613	ribonucleoprotein complex biogenesis	-2.00199	3.29069	3.13173	22539	467	88	6	6.81818	2.68694	4869|6628|6632|6895|10856|57109	NPM1|SNRPB|SNRPD1|TARBP2|RUVBL2|REXO4	-0.996764	Alcohoic_related
GO Biological Processes	19	GO:0000122	negative regulation of transcription by RNA polymerase II	-34.2617	10.5973	20.4106	22539	789	124	46	37.0968	4.33804	142|367|473|1810|1958|2099|2114|2146|2305|2354|2627|3068|3090|3096|4088|4092|4094|4601|5187|5931|5993|6299|6304|6597|6662|6943|7020|7703|7743|8431|8462|8863|9242|9611|9971|10614|11278|23051|23466|23493|51085|51176|53335|55689|79723|79733	PARP1|AR|RERE|DR1|EGR1|ESR1|ETS2|EZH2|FOXM1|FOSB|GATA6|HDGF|HIC1|HIVEP1|SMAD3|SMAD7|MAF|MXI1|PER1|RBBP7|RFX5|SALL1|SATB1|SMARCA4|SOX9|TCF21|TFAP2A|PCGF2|ZNF189|NR0B2|KLF11|PER3|MSC|NCOR1|NR1H4|HEXIM1|KLF12|ZHX3|CBX6|HEY2|MLXIPL|LEF1|BCL11A|YEATS2|SUV39H2|E2F8	-29.9613	HBV_related
GO Biological Processes	19	GO:0006325	chromatin organization	-17.7751	7.28946	13.2347	22539	773	124	31	25	3.88857	473|672|675|1810|2099|2146|3148|3159|4171|4676|4869|5187|5931|6299|6304|6597|6662|7703|9611|9971|10626|10891|11335|23408|23410|23466|26039|51176|51230|55689|79723	RERE|BRCA1|BRCA2|DR1|ESR1|EZH2|HMGB2|HMGA1|MCM2|NAP1L4|NPM1|PER1|RBBP7|SALL1|SATB1|SMARCA4|SOX9|PCGF2|NCOR1|NR1H4|TRIM16|PPARGC1A|CBX3|SIRT5|SIRT3|CBX6|SS18L1|LEF1|PHF20|YEATS2|SUV39H2	-14.1737	HBV_related
GO Biological Processes	19	GO:0048545	response to steroid hormone	-14.4872	9.81257	13.0404	22539	389	124	21	16.9355	3.36818	142|367|672|687|2099|2353|2354|3148|4306|4824|5187|5931|6597|6943|8431|8856|9970|9971|10891|11335|51176	PARP1|AR|BRCA1|KLF9|ESR1|FOS|FOSB|HMGB2|NR3C2|NKX3-1|PER1|RBBP7|SMARCA4|TCF21|NR0B2|NR1I2|NR1I3|NR1H4|PPARGC1A|CBX3|LEF1	-11.0899	HBV_related
GO Biological Processes	19	GO:0071407	cellular response to organic cyclic compound	-13.181	7.34731	11.4059	22539	569	124	23	18.5484	3.49054	142|367|672|687|1958|2099|2146|4086|4088|4306|4824|4869|5187|6597|6943|8431|8856|9611|9970|9971|10891|11335|51176	PARP1|AR|BRCA1|KLF9|EGR1|ESR1|EZH2|SMAD1|SMAD3|NR3C2|NKX3-1|NPM1|PER1|SMARCA4|TCF21|NR0B2|NR1I2|NCOR1|NR1I3|NR1H4|PPARGC1A|CBX3|LEF1	-10.0436	HBV_related
GO Biological Processes	19	GO:0071383	cellular response to steroid hormone stimulus	-13.1678	11.9768	13.1892	22539	258	124	17	13.7097	3.08876	142|367|672|687|2099|4306|4824|5187|6597|6943|8431|8856|9970|9971|10891|11335|51176	PARP1|AR|BRCA1|KLF9|ESR1|NR3C2|NKX3-1|PER1|SMARCA4|TCF21|NR0B2|NR1I2|NR1I3|NR1H4|PPARGC1A|CBX3|LEF1	-10.0436	HBV_related
GO Biological Processes	19	GO:0043401	steroid hormone mediated signaling pathway	-12.768	14.2748	13.7033	22539	191	124	15	12.0968	2.92837	142|367|672|2099|4306|4824|5187|6597|6943|8431|8856|9970|9971|10891|51176	PARP1|AR|BRCA1|ESR1|NR3C2|NKX3-1|PER1|SMARCA4|TCF21|NR0B2|NR1I2|NR1I3|NR1H4|PPARGC1A|LEF1	-9.67172	HBV_related
GO Biological Processes	19	GO:0016569	covalent chromatin modification	-12.4077	7.17927	10.9832	22539	557	124	22	17.7419	3.43067	672|675|1810|2146|5187|5931|6299|6304|6597|7703|9611|9971|10626|10891|11335|23410|23466|26039|51176|51230|55689|79723	BRCA1|BRCA2|DR1|EZH2|PER1|RBBP7|SALL1|SATB1|SMARCA4|PCGF2|NCOR1|NR1H4|TRIM16|PPARGC1A|CBX3|SIRT3|CBX6|SS18L1|LEF1|PHF20|YEATS2|SUV39H2	-9.36264	HBV_related
GO Biological Processes	19	GO:0006367	transcription initiation from RNA polymerase II promoter	-11.6893	13.6813	12.9167	22539	186	124	14	11.2903	2.84202	367|2099|2960|4306|5440|6662|7004|8431|8856|9970|9971|10891|10923|23493	AR|ESR1|GTF2E1|NR3C2|POLR2K|SOX9|TEAD4|NR0B2|NR1I2|NR1I3|NR1H4|PPARGC1A|SUB1|HEY2	-8.68994	HBV_related
GO Biological Processes	19	GO:0009755	hormone-mediated signaling pathway	-11.5382	11.7521	12.2438	22539	232	124	15	12.0968	2.92837	142|367|672|2099|4306|4824|5187|6597|6943|8431|8856|9970|9971|10891|51176	PARP1|AR|BRCA1|ESR1|NR3C2|NKX3-1|PER1|SMARCA4|TCF21|NR0B2|NR1I2|NR1I3|NR1H4|PPARGC1A|LEF1	-8.56009	HBV_related
GO Biological Processes	19	GO:0018205	peptidyl-lysine modification	-11.3532	8.45424	11.0015	22539	387	124	18	14.5161	3.16342	672|675|1810|1958|2146|5187|6659|7703|10401|10626|10891|23408|23410|51176|51230|53335|55689|79723	BRCA1|BRCA2|DR1|EGR1|EZH2|PER1|SOX4|PCGF2|PIAS3|TRIM16|PPARGC1A|SIRT5|SIRT3|LEF1|PHF20|BCL11A|YEATS2|SUV39H2	-8.41458	HBV_related
GO Biological Processes	19	GO:0006352	DNA-templated transcription, initiation	-10.1731	10.559	11.0966	22539	241	124	14	11.2903	2.84202	367|2099|2960|4306|5440|6662|7004|8431|8856|9970|9971|10891|10923|23493	AR|ESR1|GTF2E1|NR3C2|POLR2K|SOX9|TEAD4|NR0B2|NR1I2|NR1I3|NR1H4|PPARGC1A|SUB1|HEY2	-7.42904	HBV_related
GO Biological Processes	19	GO:0071396	cellular response to lipid	-9.52333	6.09093	9.13173	22539	567	124	19	15.3226	3.23474	142|367|672|687|2099|3148|4306|4824|5187|6597|6662|6943|8431|8856|9970|9971|10891|11335|51176	PARP1|AR|BRCA1|KLF9|ESR1|HMGB2|NR3C2|NKX3-1|PER1|SMARCA4|SOX9|TCF21|NR0B2|NR1I2|NR1I3|NR1H4|PPARGC1A|CBX3|LEF1	-6.85839	HBV_related
GO Biological Processes	19	GO:0016570	histone modification	-9.41219	6.94387	9.41915	22539	445	124	17	13.7097	3.08876	672|675|1810|2146|5187|5931|6299|6304|7703|9971|10626|10891|23410|51176|51230|55689|79723	BRCA1|BRCA2|DR1|EZH2|PER1|RBBP7|SALL1|SATB1|PCGF2|NR1H4|TRIM16|PPARGC1A|SIRT3|LEF1|PHF20|YEATS2|SUV39H2	-6.77459	HBV_related
GO Biological Processes	19	GO:0030522	intracellular receptor signaling pathway	-9.215	8.92886	10.0191	22539	285	124	14	11.2903	2.84202	142|367|672|2099|2146|4824|5187|6597|6943|8856|9970|9971|10626|10891	PARP1|AR|BRCA1|ESR1|EZH2|NKX3-1|PER1|SMARCA4|TCF21|NR1I2|NR1I3|NR1H4|TRIM16|PPARGC1A	-6.61855	HBV_related
GO Biological Processes	19	GO:0001763	morphogenesis of a branching structure	-9.0167	11.072	10.5606	22539	197	124	12	9.67742	2.65502	367|473|2099|3202|3217|4824|5308|6299|6662|6943|51176|53335	AR|RERE|ESR1|HOXA5|HOXB7|NKX3-1|PITX2|SALL1|SOX9|TCF21|LEF1|BCL11A	-6.45455	HBV_related
GO Biological Processes	19	GO:0032870	cellular response to hormone stimulus	-8.93775	5.2839	8.48784	22539	688	124	20	16.129	3.30293	142|367|672|687|2099|2353|2354|2627|4306|4824|5187|6597|6943|8431|8856|9970|9971|10891|11335|51176	PARP1|AR|BRCA1|KLF9|ESR1|FOS|FOSB|GATA6|NR3C2|NKX3-1|PER1|SMARCA4|TCF21|NR0B2|NR1I2|NR1I3|NR1H4|PPARGC1A|CBX3|LEF1	-6.39327	HBV_related
GO Biological Processes	19	GO:0018394	peptidyl-lysine acetylation	-8.83005	12.4188	10.8149	22539	161	124	11	8.87097	2.55331	672|675|1810|5187|6659|7703|10626|10891|51176|51230|55689	BRCA1|BRCA2|DR1|PER1|SOX4|PCGF2|TRIM16|PPARGC1A|LEF1|PHF20|YEATS2	-6.30054	HBV_related
GO Biological Processes	19	GO:0043009	chordate embryonic development	-8.72596	5.82169	8.60959	22539	562	124	18	14.5161	3.16342	367|672|675|2627|3202|3217|4088|4097|4824|5308|6659|6662|7020|7703|9355|23493|51176|79733	AR|BRCA1|BRCA2|GATA6|HOXA5|HOXB7|SMAD3|MAFG|NKX3-1|PITX2|SOX4|SOX9|TFAP2A|PCGF2|LHX2|HEY2|LEF1|E2F8	-6.21093	HBV_related
GO Biological Processes	19	GO:0009792	embryo development ending in birth or egg hatching	-8.51124	5.64102	8.42209	22539	580	124	18	14.5161	3.16342	367|672|675|2627|3202|3217|4088|4097|4824|5308|6659|6662|7020|7703|9355|23493|51176|79733	AR|BRCA1|BRCA2|GATA6|HOXA5|HOXB7|SMAD3|MAFG|NKX3-1|PITX2|SOX4|SOX9|TFAP2A|PCGF2|LHX2|HEY2|LEF1|E2F8	-6.01707	HBV_related
GO Biological Processes	19	GO:0030518	intracellular steroid hormone receptor signaling pathway	-8.31834	13.1715	10.6671	22539	138	124	10	8.06452	2.44523	142|367|672|2099|4824|5187|6597|6943|9970|10891	PARP1|AR|BRCA1|ESR1|NKX3-1|PER1|SMARCA4|TCF21|NR1I3|PPARGC1A	-5.86308	HBV_related
GO Biological Processes	19	GO:0006473	protein acetylation	-8.09725	10.579	9.83582	22539	189	124	11	8.87097	2.55331	672|675|1810|5187|6659|7703|10626|10891|51176|51230|55689	BRCA1|BRCA2|DR1|PER1|SOX4|PCGF2|TRIM16|PPARGC1A|LEF1|PHF20|YEATS2	-5.67195	HBV_related
GO Biological Processes	19	GO:0030330	DNA damage response, signal transduction by p53 class mediator	-7.99905	14.8718	10.8473	22539	110	124	9	7.25806	2.3299	602|672|675|1820|2305|3090|4869|6659|79733	BCL3|BRCA1|BRCA2|ARID3A|FOXM1|HIC1|NPM1|SOX4|E2F8	-5.58923	HBV_related
GO Biological Processes	19	GO:0016573	histone acetylation	-7.99635	12.1991	10.2011	22539	149	124	10	8.06452	2.44523	672|675|1810|5187|7703|10626|10891|51176|51230|55689	BRCA1|BRCA2|DR1|PER1|PCGF2|TRIM16|PPARGC1A|LEF1|PHF20|YEATS2	-5.58923	HBV_related
Reactome Gene Sets	6	R-HSA-383280	Nuclear Receptor transcription pathway	-7.97654	25.4473	12.8715	22539	50	124	7	5.64516	2.07257	367|2099|4306|8431|8856|9970|9971	AR|ESR1|NR3C2|NR0B2|NR1I2|NR1I3|NR1H4	-5.57927	HBV_related
GO Biological Processes	19	GO:0045786	negative regulation of cell cycle	-7.9648	5.20157	7.94905	22539	629	124	18	14.5161	3.16342	672|1820|2146|2305|2627|4088|4824|4869|5931|6659|7703|9232|9319|9700|10614|11335|51085|79733	BRCA1|ARID3A|EZH2|FOXM1|GATA6|SMAD3|NKX3-1|NPM1|RBBP7|SOX4|PCGF2|PTTG1|TRIP13|ESPL1|HEXIM1|CBX3|MLXIPL|E2F8	-5.57826	HBV_related
GO Biological Processes	19	GO:0048732	gland development	-7.92721	6.46088	8.42277	22539	422	124	15	12.0968	2.92837	367|675|2099|2146|2627|3202|4088|4824|5308|6299|6662|6943|9935|51176|79733	AR|BRCA2|ESR1|EZH2|GATA6|HOXA5|SMAD3|NKX3-1|PITX2|SALL1|SOX9|TCF21|MAFB|LEF1|E2F8	-5.54594	HBV_related
GO Biological Processes	19	GO:0048754	branching morphogenesis of an epithelial tube	-7.91308	11.9583	10.0825	22539	152	124	10	8.06452	2.44523	367|2099|3202|3217|4824|5308|6299|6662|6943|51176	AR|ESR1|HOXA5|HOXB7|NKX3-1|PITX2|SALL1|SOX9|TCF21|LEF1	-5.54214	HBV_related
GO Biological Processes	19	GO:0018393	internal peptidyl-lysine acetylation	-7.85857	11.803	10.0052	22539	154	124	10	8.06452	2.44523	672|675|1810|5187|7703|10626|10891|51176|51230|55689	BRCA1|BRCA2|DR1|PER1|PCGF2|TRIM16|PPARGC1A|LEF1|PHF20|YEATS2	-5.49271	HBV_related
Canonical Pathways	11	M2	PID SMAD2 3NUCLEAR PATHWAY	-7.77103	17.7333	11.2905	22539	82	124	8	6.45161	2.20618	367|2099|2353|4088|4092|5931|9611|10401	AR|ESR1|FOS|SMAD3|SMAD7|RBBP7|NCOR1|PIAS3	-5.42491	HBV_related
GO Biological Processes	19	GO:0006475	internal protein amino acid acetylation	-7.69963	11.3604	9.78171	22539	160	124	10	8.06452	2.44523	672|675|1810|5187|7703|10626|10891|51176|51230|55689	BRCA1|BRCA2|DR1|PER1|PCGF2|TRIM16|PPARGC1A|LEF1|PHF20|YEATS2	-5.38605	HBV_related
GO Biological Processes	19	GO:0060562	epithelial tube morphogenesis	-7.667	7.47772	8.62509	22539	316	124	13	10.4839	2.75106	367|2099|3202|3217|4088|4824|5308|6299|6659|6662|6943|9355|51176	AR|ESR1|HOXA5|HOXB7|SMAD3|NKX3-1|PITX2|SALL1|SOX4|SOX9|TCF21|LHX2|LEF1	-5.36664	HBV_related
GO Biological Processes	19	GO:0048598	embryonic morphogenesis	-7.65889	5.30021	7.82432	22539	583	124	17	13.7097	3.08876	367|2114|2627|3202|3217|4086|4088|5308|6299|6659|6662|6943|7020|7703|9355|9935|51176	AR|ETS2|GATA6|HOXA5|HOXB7|SMAD1|SMAD3|PITX2|SALL1|SOX4|SOX9|TCF21|TFAP2A|PCGF2|LHX2|MAFB|LEF1	-5.36329	HBV_related
GO Biological Processes	19	GO:0001655	urogenital system development	-7.65081	7.45413	8.60746	22539	317	124	13	10.4839	2.75106	367|1958|2099|3217|4086|4088|4092|4824|6299|6659|6662|6943|7020	AR|EGR1|ESR1|HOXB7|SMAD1|SMAD3|SMAD7|NKX3-1|SALL1|SOX4|SOX9|TCF21|TFAP2A	-5.36329	HBV_related
GO Biological Processes	19	GO:0006338	chromatin remodeling	-7.54717	10.9498	9.56982	22539	166	124	10	8.06452	2.44523	473|2099|3159|4869|5931|6304|6597|6662|11335|79723	RERE|ESR1|HMGA1|NPM1|RBBP7|SATB1|SMARCA4|SOX9|CBX3|SUV39H2	-5.28821	HBV_related
GO Biological Processes	19	GO:0030855	epithelial cell differentiation	-7.43326	4.53223	7.37779	22539	762	124	19	15.3226	3.23474	367|2099|2146|2627|3202|4088|4094|4097|4831|5308|6299|6659|6662|6943|10626|23493|26298|51176|79733	AR|ESR1|EZH2|GATA6|HOXA5|SMAD3|MAF|MAFG|NME2|PITX2|SALL1|SOX4|SOX9|TCF21|TRIM16|HEY2|EHF|LEF1|E2F8	-5.18212	HBV_related
GO Biological Processes	19	GO:0072331	signal transduction by p53 class mediator	-7.42665	7.98972	8.6421	22539	273	124	12	9.67742	2.65502	602|672|675|1820|2305|3090|4869|5931|6659|10614|51230|79733	BCL3|BRCA1|BRCA2|ARID3A|FOXM1|HIC1|NPM1|RBBP7|SOX4|HEXIM1|PHF20|E2F8	-5.18058	HBV_related
GO Biological Processes	19	GO:0060537	muscle tissue development	-7.42404	6.45869	8.13014	22539	394	124	14	11.2903	2.84202	1958|2353|2627|3131|4086|4088|4092|5308|6662|6943|9242|10891|23493|51176	EGR1|FOS|GATA6|HLF|SMAD1|SMAD3|SMAD7|PITX2|SOX9|TCF21|MSC|PPARGC1A|HEY2|LEF1	-5.18058	HBV_related
GO Biological Processes	19	GO:0071824	protein-DNA complex subunit organization	-7.39183	7.93161	8.60198	22539	275	124	12	9.67742	2.65502	142|2099|3148|3159|4171|4676|4869|5931|6597|6662|6666|23493	PARP1|ESR1|HMGB2|HMGA1|MCM2|NAP1L4|NPM1|RBBP7|SMARCA4|SOX9|SOX12|HEY2	-5.16339	HBV_related
GO Biological Processes	19	GO:0043966	histone H3 acetylation	-7.25877	20.1962	11.3482	22539	63	124	7	5.64516	2.07257	672|675|1810|5187|10626|51176|55689	BRCA1|BRCA2|DR1|PER1|TRIM16|LEF1|YEATS2	-5.05183	HBV_related
GO Biological Processes	19	GO:0042770	signal transduction in response to DNA damage	-7.24887	12.2082	9.67863	22539	134	124	9	7.25806	2.3299	602|672|675|1820|2305|3090|4869|6659|79733	BCL3|BRCA1|BRCA2|ARID3A|FOXM1|HIC1|NPM1|SOX4|E2F8	-5.04543	HBV_related
GO Biological Processes	19	GO:0043543	protein acylation	-7.23745	8.73112	8.74601	22539	229	124	11	8.87097	2.55331	672|675|1810|5187|6659|7703|10626|10891|51176|51230|55689	BRCA1|BRCA2|DR1|PER1|SOX4|PCGF2|TRIM16|PPARGC1A|LEF1|PHF20|YEATS2	-5.03746	HBV_related
GO Biological Processes	19	GO:0006268	DNA unwinding involved in DNA replication	-7.22147	90.8831	18.9118	22539	8	124	4	3.22581	1.58668	3159|4171|4173|4175	HMGA1|MCM2|MCM4|MCM6	-5.02492	HBV_related
GO Biological Processes	19	GO:0010948	negative regulation of cell cycle process	-7.17633	6.79011	8.09632	22539	348	124	13	10.4839	2.75106	672|1820|2146|4869|5931|6659|7703|9232|9319|9700|11335|51085|79733	BRCA1|ARID3A|EZH2|NPM1|RBBP7|SOX4|PCGF2|PTTG1|TRIP13|ESPL1|CBX3|MLXIPL|E2F8	-4.98992	HBV_related
GO Biological Processes	19	GO:0061138	morphogenesis of a branching epithelium	-7.12416	9.87859	8.99425	22539	184	124	10	8.06452	2.44523	367|2099|3202|3217|4824|5308|6299|6662|6943|51176	AR|ESR1|HOXA5|HOXB7|NKX3-1|PITX2|SALL1|SOX9|TCF21|LEF1	-4.94108	HBV_related
GO Biological Processes	19	GO:0048729	tissue morphogenesis	-7.09348	4.8433	7.32456	22539	638	124	17	13.7097	3.08876	367|2099|3202|3217|4086|4088|4092|4824|5308|6299|6659|6662|6943|7020|9355|23493|51176	AR|ESR1|HOXA5|HOXB7|SMAD1|SMAD3|SMAD7|NKX3-1|PITX2|SALL1|SOX4|SOX9|TCF21|TFAP2A|LHX2|HEY2|LEF1	-4.9137	HBV_related
GO Biological Processes	19	GO:0030521	androgen receptor signaling pathway	-7.07026	18.9905	10.9688	22539	67	124	7	5.64516	2.07257	367|672|4824|6597|6943|9970|10891	AR|BRCA1|NKX3-1|SMARCA4|TCF21|NR1I3|PPARGC1A	-4.89375	HBV_related
GO Biological Processes	19	GO:0008285	negative regulation of cell proliferation	-7.02994	4.51281	7.15082	22539	725	124	18	14.5161	3.16342	367|675|687|863|3159|3621|4086|4088|4601|4824|4869|6659|6662|7020|8462|10140|10891|22954	AR|BRCA2|KLF9|CBFA2T3|HMGA1|ING1|SMAD1|SMAD3|MXI1|NKX3-1|NPM1|SOX4|SOX9|TFAP2A|KLF11|TOB1|PPARGC1A|TRIM32	-4.85669	HBV_related
GO Biological Processes	19	GO:0048568	embryonic organ development	-7.0055	5.97353	7.70806	22539	426	124	14	11.2903	2.84202	3202|3217|4088|5308|6299|6662|6943|7004|7020|7703|9935|23493|51176|79733	HOXA5|HOXB7|SMAD3|PITX2|SALL1|SOX9|TCF21|TEAD4|TFAP2A|PCGF2|MAFB|HEY2|LEF1|E2F8	-4.83548	HBV_related
GO Biological Processes	19	GO:0048511	rhythmic process	-6.79541	6.991	7.92566	22539	312	124	12	9.67742	2.65502	687|1958|2099|2146|3131|4862|5187|8863|9611|10891|11335|79723	KLF9|EGR1|ESR1|EZH2|HLF|NPAS2|PER1|PER3|NCOR1|PPARGC1A|CBX3|SUV39H2	-4.65941	HBV_related
GO Biological Processes	19	GO:0033143	regulation of intracellular steroid hormone receptor signaling pathway	-6.72766	16.9648	10.3003	22539	75	124	7	5.64516	2.07257	142|367|672|2099|5187|6597|6943	PARP1|AR|BRCA1|ESR1|PER1|SMARCA4|TCF21	-4.61483	HBV_related
GO Biological Processes	19	GO:0071156	regulation of cell cycle arrest	-6.67559	12.8684	9.40707	22539	113	124	8	6.45161	2.20618	672|1820|2305|2627|4869|6659|51085|79733	BRCA1|ARID3A|FOXM1|GATA6|NPM1|SOX4|MLXIPL|E2F8	-4.57114	HBV_related
GO Biological Processes	19	GO:0051101	regulation of DNA binding	-6.64598	12.7555	9.35895	22539	114	124	8	6.45161	2.20618	142|602|3148|5308|9355|22927|23493|51176	PARP1|BCL3|HMGB2|PITX2|LHX2|HABP4|HEY2|LEF1	-4.54702	HBV_related
GO Biological Processes	19	GO:0001822	kidney development	-6.59749	7.54501	7.97138	22539	265	124	11	8.87097	2.55331	1958|3217|4086|4088|4092|4824|6299|6659|6662|6943|7020	EGR1|HOXB7|SMAD1|SMAD3|SMAD7|NKX3-1|SALL1|SOX4|SOX9|TCF21|TFAP2A	-4.52502	HBV_related
GO Biological Processes	19	GO:0003002	regionalization	-6.54813	6.62977	7.65091	22539	329	124	12	9.67742	2.65502	367|2114|3202|3217|4088|4824|5308|7703|9355|9935|23493|51176	AR|ETS2|HOXA5|HOXB7|SMAD3|NKX3-1|PITX2|PCGF2|LHX2|MAFB|HEY2|LEF1	-4.48832	HBV_related
GO Biological Processes	19	GO:0008406	gonad development	-6.51288	8.49374	8.19236	22539	214	124	10	8.06452	2.44523	367|675|2099|2627|3148|4824|5308|6299|6662|6943	AR|BRCA2|ESR1|GATA6|HMGB2|NKX3-1|PITX2|SALL1|SOX9|TCF21	-4.4605	HBV_related
GO Biological Processes	19	GO:0045137	development of primary sexual characteristics	-6.40224	8.2621	8.05073	22539	220	124	10	8.06452	2.44523	367|675|2099|2627|3148|4824|5308|6299|6662|6943	AR|BRCA2|ESR1|GATA6|HMGB2|NKX3-1|PITX2|SALL1|SOX9|TCF21	-4.3667	HBV_related
GO Biological Processes	19	GO:0032392	DNA geometric change	-6.3871	15.1472	9.66167	22539	84	124	7	5.64516	2.07257	142|2547|3148|3159|4171|4173|4175	PARP1|XRCC6|HMGB2|HMGA1|MCM2|MCM4|MCM6	-4.35731	HBV_related
Canonical Pathways	11	M195	PID CMYB PATHWAY	-6.3871	15.1472	9.66167	22539	84	124	7	5.64516	2.07257	1052|2114|4094|4173|9611|10401|51176	CEBPD|ETS2|MAF|MCM4|NCOR1|PIAS3|LEF1	-4.35731	HBV_related
GO Biological Processes	19	GO:0072001	renal system development	-6.34423	7.1154	7.67245	22539	281	124	11	8.87097	2.55331	1958|3217|4086|4088|4092|4824|6299|6659|6662|6943|7020	EGR1|HOXB7|SMAD1|SMAD3|SMAD7|NKX3-1|SALL1|SOX4|SOX9|TCF21|TFAP2A	-4.31829	HBV_related
GO Biological Processes	19	GO:0007389	pattern specification process	-6.2534	5.63952	7.12996	22539	419	124	13	10.4839	2.75106	367|2114|3202|3217|4086|4088|4824|5308|7703|9355|9935|23493|51176	AR|ETS2|HOXA5|HOXB7|SMAD1|SMAD3|NKX3-1|PITX2|PCGF2|LHX2|MAFB|HEY2|LEF1	-4.24751	HBV_related
GO Biological Processes	19	GO:0014888	striated muscle adaptation	-6.19621	19.4749	10.2955	22539	56	124	6	4.83871	1.92701	2146|2627|4088|9569|10891|23493	EZH2|GATA6|SMAD3|GTF2IRD1|PPARGC1A|HEY2	-4.20761	HBV_related
CORUM	33	CORUM:2792	MCM2-MCM4-MCM6-MCM7 complex	-6.18875	136.325	20.1315	22539	4	124	3	2.41935	1.37981	4171|4173|4175	MCM2|MCM4|MCM6	-4.20226	HBV_related
GO Biological Processes	19	GO:0071103	DNA conformation change	-6.16494	6.82398	7.46324	22539	293	124	11	8.87097	2.55331	142|2547|3148|3159|4171|4173|4175|4676|4869|5931|6662	PARP1|XRCC6|HMGB2|HMGA1|MCM2|MCM4|MCM6|NAP1L4|NPM1|RBBP7|SOX9	-4.1868	HBV_related
GO Biological Processes	19	GO:0010564	regulation of cell cycle process	-6.14785	4.14768	6.4983	22539	745	124	17	13.7097	3.08876	672|675|1820|2146|2305|2627|4869|5931|6659|6662|7703|9232|9319|9700|11335|51085|79733	BRCA1|BRCA2|ARID3A|EZH2|FOXM1|GATA6|NPM1|RBBP7|SOX4|SOX9|PCGF2|PTTG1|TRIP13|ESPL1|CBX3|MLXIPL|E2F8	-4.17383	HBV_related
GO Biological Processes	19	GO:0048608	reproductive structure development	-6.12703	5.49526	7.00008	22539	430	124	13	10.4839	2.75106	367|675|2099|2627|3148|4824|5308|6299|6662|6943|23493|51176|79733	AR|BRCA2|ESR1|GATA6|HMGB2|NKX3-1|PITX2|SALL1|SOX9|TCF21|HEY2|LEF1|E2F8	-4.16112	HBV_related
GO Biological Processes	19	GO:0061458	reproductive system development	-6.09323	5.45718	6.96544	22539	433	124	13	10.4839	2.75106	367|675|2099|2627|3148|4824|5308|6299|6662|6943|23493|51176|79733	AR|BRCA2|ESR1|GATA6|HMGB2|NKX3-1|PITX2|SALL1|SOX9|TCF21|HEY2|LEF1|E2F8	-4.13133	HBV_related
GO Biological Processes	19	GO:0008584	male gonad development	-6.05865	10.6921	8.43208	22539	136	124	8	6.45161	2.20618	367|2099|2627|3148|4824|5308|6662|6943	AR|ESR1|GATA6|HMGB2|NKX3-1|PITX2|SOX9|TCF21	-4.10464	HBV_related
GO Biological Processes	19	GO:0046546	development of primary male sexual characteristics	-6.0345	10.6141	8.39506	22539	137	124	8	6.45161	2.20618	367|2099|2627|3148|4824|5308|6662|6943	AR|ESR1|GATA6|HMGB2|NKX3-1|PITX2|SOX9|TCF21	-4.08439	HBV_related
GO Biological Processes	19	GO:0065004	protein-DNA complex assembly	-5.99163	7.44943	7.53376	22539	244	124	10	8.06452	2.44523	142|2099|3148|4171|4676|4869|5931|6662|6666|23493	PARP1|ESR1|HMGB2|MCM2|NAP1L4|NPM1|RBBP7|SOX9|SOX12|HEY2	-4.053	HBV_related
GO Biological Processes	19	GO:0001657	ureteric bud development	-5.96	13.1171	8.89517	22539	97	124	7	5.64516	2.07257	3217|4086|4088|4092|6299|6662|6943	HOXB7|SMAD1|SMAD3|SMAD7|SALL1|SOX9|TCF21	-4.027	HBV_related
GO Biological Processes	19	GO:1902893	regulation of pri-miRNA transcription by RNA polymerase II	-5.94386	26.7303	11.1672	22539	34	124	5	4.03226	1.76655	2353|4086|4088|6597|6662	FOS|SMAD1|SMAD3|SMARCA4|SOX9	-4.02008	HBV_related
GO Biological Processes	19	GO:0072163	mesonephric epithelium development	-5.92978	12.9833	8.84234	22539	98	124	7	5.64516	2.07257	3217|4086|4088|4092|6299|6662|6943	HOXB7|SMAD1|SMAD3|SMAD7|SALL1|SOX9|TCF21	-4.00964	HBV_related
GO Biological Processes	19	GO:0072164	mesonephric tubule development	-5.92978	12.9833	8.84234	22539	98	124	7	5.64516	2.07257	3217|4086|4088|4092|6299|6662|6943	HOXB7|SMAD1|SMAD3|SMAD7|SALL1|SOX9|TCF21	-4.00964	HBV_related
GO Biological Processes	19	GO:0014706	striated muscle tissue development	-5.92327	5.78566	6.96959	22539	377	124	12	9.67742	2.65502	1958|2353|2627|3131|4086|4088|4092|5308|6943|9242|23493|51176	EGR1|FOS|GATA6|HLF|SMAD1|SMAD3|SMAD7|PITX2|TCF21|MSC|HEY2|LEF1	-4.00581	HBV_related
GO Biological Processes	19	GO:0006333	chromatin assembly or disassembly	-5.92235	8.52029	7.78349	22539	192	124	9	7.25806	2.3299	3148|3159|4171|4676|4869|5931|6597|6662|79723	HMGB2|HMGA1|MCM2|NAP1L4|NPM1|RBBP7|SMARCA4|SOX9|SUV39H2	-4.00581	HBV_related
GO Biological Processes	19	GO:0043967	histone H4 acetylation	-5.88915	17.3111	9.64255	22539	63	124	6	4.83871	1.92701	672|675|5187|10626|51176|51230	BRCA1|BRCA2|PER1|TRIM16|LEF1|PHF20	-3.98149	HBV_related
Reactome Gene Sets	6	R-HSA-8953750	Transcriptional Regulation by E2F6	-5.87882	25.9666	10.9942	22539	35	124	5	4.03226	1.76655	672|2146|5931|7703|11335	BRCA1|EZH2|RBBP7|PCGF2|CBX3	-3.9742	HBV_related
GO Biological Processes	19	GO:0002009	morphogenesis of an epithelium	-5.86687	4.80137	6.58684	22539	530	124	14	11.2903	2.84202	367|2099|3202|3217|4088|4824|5308|6299|6659|6662|6943|7020|9355|51176	AR|ESR1|HOXA5|HOXB7|SMAD3|NKX3-1|PITX2|SALL1|SOX4|SOX9|TCF21|TFAP2A|LHX2|LEF1	-3.96619	HBV_related
GO Biological Processes	19	GO:0007050	cell cycle arrest	-5.86492	7.21294	7.37685	22539	252	124	10	8.06452	2.44523	672|1820|2305|2627|4088|4824|4869|6659|51085|79733	BRCA1|ARID3A|FOXM1|GATA6|SMAD3|NKX3-1|NPM1|SOX4|MLXIPL|E2F8	-3.96597	HBV_related
GO Biological Processes	19	GO:0001823	mesonephros development	-5.81223	12.4741	8.63848	22539	102	124	7	5.64516	2.07257	3217|4086|4088|4092|6299|6662|6943	HOXB7|SMAD1|SMAD3|SMAD7|SALL1|SOX9|TCF21	-3.91843	HBV_related
GO Biological Processes	19	GO:0051090	regulation of DNA binding transcription factor activity	-5.77007	5.5928	6.80507	22539	390	124	12	9.67742	2.65502	367|2099|2146|2353|4092|4869|6597|8431|9971|10891|11074|22954	AR|ESR1|EZH2|FOS|SMAD7|NPM1|SMARCA4|NR0B2|NR1H4|PPARGC1A|TRIM31|TRIM32	-3.88172	HBV_related
Canonical Pathways	11	M101	PID HDAC CLASSI PATHWAY	-5.76878	16.5242	9.39398	22539	66	124	6	4.83871	1.92701	4092|5931|9611|23408|23410|54815	SMAD7|RBBP7|NCOR1|SIRT5|SIRT3|GATAD2A	-3.88172	HBV_related
GO Biological Processes	19	GO:0007517	muscle organ development	-5.71275	5.52201	6.74374	22539	395	124	12	9.67742	2.65502	1958|2353|2627|3131|4088|4092|5308|6943|7004|9242|23493|51176	EGR1|FOS|GATA6|HLF|SMAD3|SMAD7|PITX2|TCF21|TEAD4|MSC|HEY2|LEF1	-3.834	HBV_related
GO Biological Processes	19	GO:0007548	sex differentiation	-5.63937	6.80772	7.10037	22539	267	124	10	8.06452	2.44523	367|675|2099|2627|3148|4824|5308|6299|6662|6943	AR|BRCA2|ESR1|GATA6|HMGB2|NKX3-1|PITX2|SALL1|SOX9|TCF21	-3.77358	HBV_related
GO Biological Processes	19	GO:0061614	pri-miRNA transcription by RNA polymerase II	-5.63762	23.3033	10.3684	22539	39	124	5	4.03226	1.76655	2353|4086|4088|6597|6662	FOS|SMAD1|SMAD3|SMARCA4|SOX9	-3.77342	HBV_related
GO Biological Processes	19	GO:0061061	muscle structure development	-5.62016	4.26681	6.23091	22539	639	124	15	12.0968	2.92837	1958|2146|2353|2627|3131|4088|4092|5308|6662|6943|7004|9242|22954|23493|51176	EGR1|EZH2|FOS|GATA6|HLF|SMAD3|SMAD7|PITX2|SOX9|TCF21|TEAD4|MSC|TRIM32|HEY2|LEF1	-3.75755	HBV_related
Canonical Pathways	11	M167	PID AP1 PATHWAY	-5.61728	15.58	9.08683	22539	70	124	6	4.83871	1.92701	1958|2099|2353|2354|4094|4097	EGR1|ESR1|FOS|FOSB|MAF|MAFG	-3.75626	HBV_related
GO Biological Processes	19	GO:0070317	negative regulation of G0 to G1 transition	-5.58153	22.7208	10.2264	22539	40	124	5	4.03226	1.76655	672|2146|5931|7703|11335	BRCA1|EZH2|RBBP7|PCGF2|CBX3	-3.72209	HBV_related
GO Biological Processes	19	GO:0043500	muscle adaptation	-5.56535	11.4627	8.21884	22539	111	124	7	5.64516	2.07257	142|2146|2627|4088|9569|10891|23493	PARP1|EZH2|GATA6|SMAD3|GTF2IRD1|PPARGC1A|HEY2	-3.70836	HBV_related
GO Biological Processes	19	GO:0046661	male sex differentiation	-5.54807	9.14547	7.66626	22539	159	124	8	6.45161	2.20618	367|2099|2627|3148|4824|5308|6662|6943	AR|ESR1|GATA6|HMGB2|NKX3-1|PITX2|SOX9|TCF21	-3.69332	HBV_related
CORUM	33	CORUM:387	MCM complex	-5.49329	90.8831	16.3773	22539	6	124	3	2.41935	1.37981	4171|4173|4175	MCM2|MCM4|MCM6	-3.64625	HBV_related
GO Biological Processes	19	GO:0001501	skeletal system development	-5.49035	4.81255	6.35287	22539	491	124	13	10.4839	2.75106	2114|3202|3217|4086|4088|4094|4665|5308|6659|6662|7004|7020|7703	ETS2|HOXA5|HOXB7|SMAD1|SMAD3|MAF|NAB2|PITX2|SOX4|SOX9|TEAD4|TFAP2A|PCGF2	-3.64484	HBV_related
GO Biological Processes	19	GO:0032508	DNA duplex unwinding	-5.47496	14.7378	8.80398	22539	74	124	6	4.83871	1.92701	142|2547|3159|4171|4173|4175	PARP1|XRCC6|HMGA1|MCM2|MCM4|MCM6	-3.63249	HBV_related
GO Biological Processes	19	GO:0051098	regulation of binding	-5.45212	5.76204	6.64903	22539	347	124	11	8.87097	2.55331	142|602|3148|4088|4824|5092|5308|9355|22927|23493|51176	PARP1|BCL3|HMGB2|SMAD3|NKX3-1|PCBD1|PITX2|LHX2|HABP4|HEY2|LEF1	-3.61416	HBV_related
GO Biological Processes	19	GO:0048562	embryonic organ morphogenesis	-5.37387	6.35546	6.7793	22539	286	124	10	8.06452	2.44523	3202|3217|4088|5308|6299|6662|6943|7020|7703|9935	HOXA5|HOXB7|SMAD3|PITX2|SALL1|SOX9|TCF21|TFAP2A|PCGF2|MAFB	-3.54978	HBV_related
GO Biological Processes	19	GO:2001022	positive regulation of response to DNA damage stimulus	-5.37364	14.1636	8.60587	22539	77	124	6	4.83871	1.92701	142|672|2305|3090|4824|4862	PARP1|BRCA1|FOXM1|HIC1|NKX3-1|NPAS2	-3.54978	HBV_related
Canonical Pathways	11	M285	PID HNF3A PATHWAY	-5.37157	20.6552	9.70646	22539	44	124	5	4.03226	1.76655	367|672|2099|2353|4824	AR|BRCA1|ESR1|FOS|NKX3-1	-3.54978	HBV_related
GO Biological Processes	19	GO:0070316	regulation of G0 to G1 transition	-5.37157	20.6552	9.70646	22539	44	124	5	4.03226	1.76655	672|2146|5931|7703|11335	BRCA1|EZH2|RBBP7|PCGF2|CBX3	-3.54978	HBV_related
GO Biological Processes	19	GO:0043414	macromolecule methylation	-5.36047	6.33331	6.76321	22539	287	124	10	8.06452	2.44523	142|672|2146|2353|6304|6628|6894|9971|54815|79723	PARP1|BRCA1|EZH2|FOS|SATB1|SNRPB|TARBP1|NR1H4|GATAD2A|SUV39H2	-3.54155	HBV_related
Reactome Gene Sets	6	R-HSA-8878166	Transcriptional regulation by RUNX2	-5.31575	10.5154	7.80585	22539	121	124	7	5.64516	2.07257	367|2099|4086|4094|6662|10891|23493	AR|ESR1|SMAD1|MAF|SOX9|PPARGC1A|HEY2	-3.50254	HBV_related
GO Biological Processes	19	GO:1903579	negative regulation of ATP metabolic process	-5.31357	34.6221	11.4649	22539	21	124	4	3.22581	1.58668	142|863|10891|51085	PARP1|CBFA2T3|PPARGC1A|MLXIPL	-3.50176	HBV_related
GO Biological Processes	19	GO:0045682	regulation of epidermis development	-5.27655	13.6325	8.41854	22539	80	124	6	4.83871	1.92701	2146|4097|4665|4831|10626|23493	EZH2|MAFG|NAB2|NME2|TRIM16|HEY2	-3.47174	HBV_related
GO Biological Processes	19	GO:0045023	G0 to G1 transition	-5.27426	19.7572	9.47157	22539	46	124	5	4.03226	1.76655	672|2146|5931|7703|11335	BRCA1|EZH2|RBBP7|PCGF2|CBX3	-3.47083	HBV_related
GO Biological Processes	19	GO:0001816	cytokine production	-5.25448	3.98028	5.89164	22539	685	124	15	12.0968	2.92837	602|672|1958|2547|2627|3148|4088|4092|4094|5187|5440|9971|10626|22954|51176	BCL3|BRCA1|EGR1|XRCC6|GATA6|HMGB2|SMAD3|SMAD7|MAF|PER1|POLR2K|NR1H4|TRIM16|TRIM32|LEF1	-3.45243	HBV_related
GO Biological Processes	19	GO:0035270	endocrine system development	-5.24532	10.261	7.69127	22539	124	124	7	5.64516	2.07257	2627|3202|4088|5308|6299|6659|6662	GATA6|HOXA5|SMAD3|PITX2|SALL1|SOX4|SOX9	-3.44888	HBV_related
Reactome Gene Sets	6	R-HSA-3108232	SUMO E3 ligases SUMOylate target proteins	-5.22226	10.1789	7.65394	22539	125	124	7	5.64516	2.07257	142|672|3090|6304|7020|7703|10401	PARP1|BRCA1|HIC1|SATB1|TFAP2A|PCGF2|PIAS3	-3.43134	HBV_related
GO Biological Processes	19	GO:0034728	nucleosome organization	-5.18519	8.16926	7.1423	22539	178	124	8	6.45161	2.20618	3148|3159|4171|4676|4869|5931|6597|6662	HMGB2|HMGA1|MCM2|NAP1L4|NPM1|RBBP7|SMARCA4|SOX9	-3.40466	HBV_related
Canonical Pathways	11	M288	PID HES HEY PATHWAY	-5.18145	18.934	9.25107	22539	48	124	5	4.03226	1.76655	142|367|2627|9611|23493	PARP1|AR|GATA6|NCOR1|HEY2	-3.40224	HBV_related
GO Biological Processes	19	GO:0045787	positive regulation of cell cycle	-5.17619	5.38929	6.34041	22539	371	124	11	8.87097	2.55331	672|675|1820|2627|4824|4869|6659|9700|22954|51085|79733	BRCA1|BRCA2|ARID3A|GATA6|NKX3-1|NPM1|SOX4|ESPL1|TRIM32|MLXIPL|E2F8	-3.39828	HBV_related
GO Biological Processes	19	GO:1902895	positive regulation of pri-miRNA transcription by RNA polymerase II	-5.14714	31.6115	10.9245	22539	23	124	4	3.22581	1.58668	2353|4086|4088|6597	FOS|SMAD1|SMAD3|SMARCA4	-3.37827	HBV_related
Reactome Gene Sets	6	R-HSA-2990846	SUMOylation	-5.08808	9.71269	7.43851	22539	131	124	7	5.64516	2.07257	142|672|3090|6304|7020|7703|10401	PARP1|BRCA1|HIC1|SATB1|TFAP2A|PCGF2|PIAS3	-3.32555	HBV_related
GO Biological Processes	19	GO:0001817	regulation of cytokine production	-5.08254	4.1044	5.82991	22539	620	124	14	11.2903	2.84202	602|672|1958|2547|2627|3148|4088|4092|5187|5440|9971|10626|22954|51176	BCL3|BRCA1|EGR1|XRCC6|GATA6|HMGB2|SMAD3|SMAD7|PER1|POLR2K|NR1H4|TRIM16|TRIM32|LEF1	-3.32126	HBV_related
GO Biological Processes	19	GO:0060485	mesenchyme development	-5.04303	6.64998	6.62719	22539	246	124	9	7.25806	2.3299	2146|3202|4088|4092|5308|6662|6943|23493|51176	EZH2|HOXA5|SMAD3|SMAD7|PITX2|SOX9|TCF21|HEY2|LEF1	-3.28922	HBV_related
GO Biological Processes	19	GO:0071158	positive regulation of cell cycle arrest	-5.03601	12.3931	7.96464	22539	88	124	6	4.83871	1.92701	672|1820|2627|4869|6659|79733	BRCA1|ARID3A|GATA6|NPM1|SOX4|E2F8	-3.28588	HBV_related
GO Biological Processes	19	GO:0001701	in utero embryonic development	-5.01803	5.78873	6.3557	22539	314	124	10	8.06452	2.44523	367|675|2627|4088|4097|5308|7703|23493|51176|79733	AR|BRCA2|GATA6|SMAD3|MAFG|PITX2|PCGF2|HEY2|LEF1|E2F8	-3.27156	HBV_related
GO Biological Processes	19	GO:1901699	cellular response to nitrogen compound	-5.01203	4.04567	5.76217	22539	629	124	14	11.2903	2.84202	142|672|1958|2099|2146|4086|4088|4869|6662|8462|9611|9971|10891|53335	PARP1|BRCA1|EGR1|ESR1|EZH2|SMAD1|SMAD3|NPM1|SOX9|KLF11|NCOR1|NR1H4|PPARGC1A|BCL11A	-3.26677	HBV_related
GO Biological Processes	19	GO:0045930	negative regulation of mitotic cell cycle	-4.99406	5.75209	6.32741	22539	316	124	10	8.06452	2.44523	672|1820|2146|4088|4824|4869|6659|9232|9319|79733	BRCA1|ARID3A|EZH2|SMAD3|NKX3-1|NPM1|SOX4|PTTG1|TRIP13|E2F8	-3.25241	HBV_related
GO Biological Processes	19	GO:0006383	transcription by RNA polymerase III	-4.96674	17.1477	8.75373	22539	53	124	5	4.03226	1.76655	367|672|2976|4665|5440	AR|BRCA1|GTF3C2|NAB2|POLR2K	-3.23341	HBV_related
GO Biological Processes	19	GO:0048762	mesenchymal cell differentiation	-4.9448	7.57359	6.80366	22539	192	124	8	6.45161	2.20618	2146|4088|4092|5308|6662|6943|23493|51176	EZH2|SMAD3|SMAD7|PITX2|SOX9|TCF21|HEY2|LEF1	-3.21498	HBV_related
GO Biological Processes	19	GO:0060740	prostate gland epithelium morphogenesis	-4.92524	27.964	10.2318	22539	26	124	4	3.22581	1.58668	367|2099|4824|6662	AR|ESR1|NKX3-1|SOX9	-3.20122	HBV_related
GO Biological Processes	19	GO:0051169	nuclear transport	-4.91784	4.6114	5.90397	22539	473	124	12	9.67742	2.65502	142|473|602|3159|4088|4601|4869|6628|6632|6659|10140|10921	PARP1|RERE|BCL3|HMGA1|SMAD3|MXI1|NPM1|SNRPB|SNRPD1|SOX4|TOB1|RNPS1	-3.19726	HBV_related
GO Biological Processes	19	GO:0007623	circadian rhythm	-4.91209	7.49551	6.75808	22539	194	124	8	6.45161	2.20618	687|2146|4862|5187|8863|9611|10891|79723	KLF9|EZH2|NPAS2|PER1|PER3|NCOR1|PPARGC1A|SUV39H2	-3.19623	HBV_related
GO Biological Processes	19	GO:0072073	kidney epithelium development	-4.89918	9.08831	7.14014	22539	140	124	7	5.64516	2.07257	3217|4086|4088|4092|6299|6662|6943	HOXB7|SMAD1|SMAD3|SMAD7|SALL1|SOX9|TCF21	-3.18765	HBV_related
GO Biological Processes	19	GO:0060688	regulation of morphogenesis of a branching structure	-4.88696	16.5242	8.57339	22539	55	124	5	4.03226	1.76655	367|2099|3217|6662|53335	AR|ESR1|HOXB7|SOX9|BCL11A	-3.17953	HBV_related
GO Biological Processes	19	GO:0044772	mitotic cell cycle phase transition	-4.8777	4.21957	5.73835	22539	560	124	13	10.4839	2.75106	672|1820|2146|2305|4171|4173|4175|4869|6659|8462|9319|9700|79733	BRCA1|ARID3A|EZH2|FOXM1|MCM2|MCM4|MCM6|NPM1|SOX4|KLF11|TRIP13|ESPL1|E2F8	-3.17284	HBV_related
Reactome Gene Sets	6	R-HSA-2151201	Transcriptional activation of mitochondrial biogenesis	-4.84825	16.2291	8.48674	22539	56	124	5	4.03226	1.76655	4899|9611|10891|23408|23410	NRF1|NCOR1|PPARGC1A|SIRT5|SIRT3	-3.15212	HBV_related
GO Biological Processes	19	GO:0050673	epithelial cell proliferation	-4.81002	4.9247	5.93538	22539	406	124	11	8.87097	2.55331	367|675|687|2099|3148|3202|4088|4824|4831|6662|26298	AR|BRCA2|KLF9|ESR1|HMGB2|HOXA5|SMAD3|NKX3-1|NME2|SOX9|EHF	-3.12244	HBV_related
GO Biological Processes	19	GO:0007178	transmembrane receptor protein serine/threonine kinase signaling pathway	-4.79727	5.45844	6.09634	22539	333	124	10	8.06452	2.44523	142|1958|2353|2627|4086|4088|4092|10140|10923|51176	PARP1|EGR1|FOS|GATA6|SMAD1|SMAD3|SMAD7|TOB1|SUB1|LEF1	-3.11287	HBV_related
GO Biological Processes	19	GO:0060512	prostate gland morphogenesis	-4.79235	25.9666	9.83196	22539	28	124	4	3.22581	1.58668	367|2099|4824|6662	AR|ESR1|NKX3-1|SOX9	-3.11109	HBV_related
GO Biological Processes	19	GO:0003006	developmental process involved in reproduction	-4.78599	3.8615	5.54512	22539	659	124	14	11.2903	2.84202	367|675|2099|2627|3148|4824|5308|6299|6662|6943|9319|23493|51176|79733	AR|BRCA2|ESR1|GATA6|HMGB2|NKX3-1|PITX2|SALL1|SOX9|TCF21|TRIP13|HEY2|LEF1|E2F8	-3.10583	HBV_related
GO Biological Processes	19	GO:0009952	anterior/posterior pattern specification	-4.78501	7.19866	6.58203	22539	202	124	8	6.45161	2.20618	2114|3202|3217|4088|4824|7703|23493|51176	ETS2|HOXA5|HOXB7|SMAD3|NKX3-1|PCGF2|HEY2|LEF1	-3.10583	HBV_related
GO Biological Processes	19	GO:0045604	regulation of epidermal cell differentiation	-4.77304	15.6695	8.31995	22539	58	124	5	4.03226	1.76655	2146|4097|4831|10626|23493	EZH2|MAFG|NME2|TRIM16|HEY2	-3.0949	HBV_related
GO Biological Processes	19	GO:0030111	regulation of Wnt signaling pathway	-4.73066	5.36183	6.01855	22539	339	124	10	8.06452	2.44523	1958|2099|3090|6299|6597|6659|6662|7089|10042|51176	EGR1|ESR1|HIC1|SALL1|SMARCA4|SOX4|SOX9|TLE2|HMGXB4|LEF1	-3.06276	HBV_related
GO Biological Processes	19	GO:0006261	DNA-dependent DNA replication	-4.72342	8.53935	6.86751	22539	149	124	7	5.64516	2.07257	142|675|3159|4171|4173|4175|79733	PARP1|BRCA2|HMGA1|MCM2|MCM4|MCM6|E2F8	-3.05653	HBV_related
GO Biological Processes	19	GO:0003279	cardiac septum development	-4.71698	10.906	7.38404	22539	100	124	6	4.83871	1.92701	2627|4092|5308|6299|6659|23493	GATA6|SMAD7|PITX2|SALL1|SOX4|HEY2	-3.05211	HBV_related
GO Biological Processes	19	GO:0016055	Wnt signaling pathway	-4.71367	4.39757	5.69079	22539	496	124	12	9.67742	2.65502	1958|2099|3090|4088|5308|6299|6597|6659|6662|7089|10042|51176	EGR1|ESR1|HIC1|SMAD3|PITX2|SALL1|SMARCA4|SOX4|SOX9|TLE2|HMGXB4|LEF1	-3.0498	HBV_related
GO Biological Processes	19	GO:0198738	cell-cell signaling by wnt	-4.69647	4.37991	5.67287	22539	498	124	12	9.67742	2.65502	1958|2099|3090|4088|5308|6299|6597|6659|6662|7089|10042|51176	EGR1|ESR1|HIC1|SMAD3|PITX2|SALL1|SMARCA4|SOX4|SOX9|TLE2|HMGXB4|LEF1	-3.0356	HBV_related
GO Biological Processes	19	GO:0035690	cellular response to drug	-4.68703	5.2993	5.9677	22539	343	124	10	8.06452	2.44523	672|687|1958|2146|4824|6662|7703|10891|11335|53335	BRCA1|KLF9|EGR1|EZH2|NKX3-1|SOX9|PCGF2|PPARGC1A|CBX3|BCL11A	-3.02946	HBV_related
GO Biological Processes	19	GO:0000082	G1/S transition of mitotic cell cycle	-4.68339	5.99229	6.17247	22539	273	124	9	7.25806	2.3299	1820|2146|4171|4173|4175|4869|6659|8462|79733	ARID3A|EZH2|MCM2|MCM4|MCM6|NPM1|SOX4|KLF11|E2F8	-3.02946	HBV_related
Canonical Pathways	11	M58	PID AR PATHWAY	-4.66537	14.8989	8.08471	22539	61	124	5	4.03226	1.76655	367|672|2547|4824|10401	AR|BRCA1|XRCC6|NKX3-1|PIAS3	-3.01629	HBV_related
Reactome Gene Sets	6	R-HSA-8943724	Regulation of PTEN gene transcription	-4.66537	14.8989	8.08471	22539	61	124	5	4.03226	1.76655	1958|2146|5931|23466|54815	EGR1|EZH2|RBBP7|CBX6|GATAD2A	-3.01629	HBV_related
Reactome Gene Sets	6	R-HSA-3247509	Chromatin modifying enzymes	-4.65842	5.94871	6.14124	22539	275	124	9	7.25806	2.3299	1810|2146|5931|6597|9611|51230|54815|55689|79723	DR1|EZH2|RBBP7|SMARCA4|NCOR1|PHF20|GATAD2A|YEATS2|SUV39H2	-3.01321	HBV_related
Reactome Gene Sets	6	R-HSA-4839726	Chromatin organization	-4.65842	5.94871	6.14124	22539	275	124	9	7.25806	2.3299	1810|2146|5931|6597|9611|51230|54815|55689|79723	DR1|EZH2|RBBP7|SMARCA4|NCOR1|PHF20|GATAD2A|YEATS2|SUV39H2	-3.01321	HBV_related
GO Biological Processes	19	GO:0032259	methylation	-4.63335	5.22316	5.90525	22539	348	124	10	8.06452	2.44523	142|672|2146|2353|6304|6628|6894|9971|54815|79723	PARP1|BRCA1|EZH2|FOS|SATB1|SNRPB|TARBP1|NR1H4|GATAD2A|SUV39H2	-2.991	HBV_related
GO Biological Processes	19	GO:0048589	developmental growth	-4.60203	3.97136	5.4633	22539	595	124	13	10.4839	2.75106	367|675|2099|2146|2627|3202|4086|4088|6299|6662|9355|23493|53335	AR|BRCA2|ESR1|EZH2|GATA6|HOXA5|SMAD1|SMAD3|SALL1|SOX9|LHX2|HEY2|BCL11A	-2.96798	HBV_related
GO Biological Processes	19	GO:0060767	epithelial cell proliferation involved in prostate gland development	-4.58558	49.5726	11.9847	22539	11	124	3	2.41935	1.37981	367|4824|6662	AR|NKX3-1|SOX9	-2.95268	HBV_related
GO Biological Processes	19	GO:0046782	regulation of viral transcription	-4.56333	14.2005	7.86555	22539	64	124	5	4.03226	1.76655	5440|6597|11074|22954|51176	POLR2K|SMARCA4|TRIM31|TRIM32|LEF1	-2.93322	HBV_related
GO Biological Processes	19	GO:0044770	cell cycle phase transition	-4.55685	3.93171	5.41825	22539	601	124	13	10.4839	2.75106	672|1820|2146|2305|4171|4173|4175|4869|6659|8462|9319|9700|79733	BRCA1|ARID3A|EZH2|FOXM1|MCM2|MCM4|MCM6|NPM1|SOX4|KLF11|TRIP13|ESPL1|E2F8	-2.92766	HBV_related
Reactome Gene Sets	6	R-HSA-8941326	RUNX2 regulates bone development	-4.55514	22.7208	9.14514	22539	32	124	4	3.22581	1.58668	367|4086|4094|23493	AR|SMAD1|MAF|HEY2	-2.92689	HBV_related
GO Biological Processes	19	GO:0007423	sensory organ development	-4.52098	4.20269	5.4902	22539	519	124	12	9.67742	2.65502	4088|4094|4171|5308|6299|6597|6662|7020|9355|9935|23493|51176	SMAD3|MAF|MCM2|PITX2|SALL1|SMARCA4|SOX9|TFAP2A|LHX2|MAFB|HEY2|LEF1	-2.90277	HBV_related
GO Biological Processes	19	GO:0014887	cardiac muscle adaptation	-4.50088	22.0323	8.99276	22539	33	124	4	3.22581	1.58668	2146|2627|4088|23493	EZH2|GATA6|SMAD3|HEY2	-2.88983	HBV_related
GO Biological Processes	19	GO:0003299	muscle hypertrophy in response to stress	-4.50088	22.0323	8.99276	22539	33	124	4	3.22581	1.58668	2146|2627|4088|23493	EZH2|GATA6|SMAD3|HEY2	-2.88983	HBV_related
GO Biological Processes	19	GO:0014898	cardiac muscle hypertrophy in response to stress	-4.50088	22.0323	8.99276	22539	33	124	4	3.22581	1.58668	2146|2627|4088|23493	EZH2|GATA6|SMAD3|HEY2	-2.88983	HBV_related
GO Biological Processes	19	GO:0033144	negative regulation of intracellular steroid hormone receptor signaling pathway	-4.50088	22.0323	8.99276	22539	33	124	4	3.22581	1.58668	672|5187|6597|6943	BRCA1|PER1|SMARCA4|TCF21	-2.88983	HBV_related
GO Biological Processes	19	GO:0071359	cellular response to dsRNA	-4.49816	13.7702	7.72746	22539	66	124	5	4.03226	1.76655	2099|4086|4088|4869|9611	ESR1|SMAD1|SMAD3|NPM1|NCOR1	-2.888	HBV_related
GO Biological Processes	19	GO:0006306	DNA methylation	-4.46638	13.5646	7.66065	22539	67	124	5	4.03226	1.76655	142|672|2146|2353|54815	PARP1|BRCA1|EZH2|FOS|GATAD2A	-2.87189	HBV_related
GO Biological Processes	19	GO:0006305	DNA alkylation	-4.46638	13.5646	7.66065	22539	67	124	5	4.03226	1.76655	142|672|2146|2353|54815	PARP1|BRCA1|EZH2|FOS|GATAD2A	-2.87189	HBV_related
GO Biological Processes	19	GO:0003281	ventricular septum development	-4.46638	13.5646	7.66065	22539	67	124	5	4.03226	1.76655	4092|5308|6299|6659|23493	SMAD7|PITX2|SALL1|SOX4|HEY2	-2.87189	HBV_related
Reactome Gene Sets	6	R-HSA-176974	Unwinding of DNA	-4.46239	45.4415	11.4532	22539	12	124	3	2.41935	1.37981	4171|4173|4175	MCM2|MCM4|MCM6	-2.87181	HBV_related
GO Biological Processes	19	GO:0060736	prostate gland growth	-4.46239	45.4415	11.4532	22539	12	124	3	2.41935	1.37981	367|2099|6662	AR|ESR1|SOX9	-2.87181	HBV_related
GO Biological Processes	19	GO:0044843	cell cycle G1/S phase transition	-4.45448	5.60238	5.88759	22539	292	124	9	7.25806	2.3299	1820|2146|4171|4173|4175|4869|6659|8462|79733	ARID3A|EZH2|MCM2|MCM4|MCM6|NPM1|SOX4|KLF11|E2F8	-2.86677	HBV_related
Canonical Pathways	11	M105	PID TELOMERASE PATHWAY	-4.43512	13.3652	7.59525	22539	68	124	5	4.03226	1.76655	2099|2353|2547|4088|5931	ESR1|FOS|XRCC6|SMAD3|RBBP7	-2.84909	HBV_related
GO Biological Processes	19	GO:0006281	DNA repair	-4.43258	4.11546	5.39833	22539	530	124	12	9.67742	2.65502	142|672|675|2305|2547|3148|3159|4862|4869|5440|9232|9319	PARP1|BRCA1|BRCA2|FOXM1|XRCC6|HMGB2|HMGA1|NPAS2|NPM1|POLR2K|PTTG1|TRIP13	-2.84739	HBV_related
GO Biological Processes	19	GO:0006260	DNA replication	-4.41995	5.54541	5.84489	22539	295	124	9	7.25806	2.3299	142|672|675|3159|4171|4173|4175|5931|79733	PARP1|BRCA1|BRCA2|HMGA1|MCM2|MCM4|MCM6|RBBP7|E2F8	-2.83932	HBV_related
GO Biological Processes	19	GO:0031497	chromatin assembly	-4.40531	7.61894	6.38548	22539	167	124	7	5.64516	2.07257	3148|3159|4171|4676|4869|5931|6662	HMGB2|HMGA1|MCM2|NAP1L4|NPM1|RBBP7|SOX9	-2.82594	HBV_related
GO Biological Processes	19	GO:0060411	cardiac septum morphogenesis	-4.40435	13.1715	7.53121	22539	69	124	5	4.03226	1.76655	2627|4092|5308|6659|23493	GATA6|SMAD7|PITX2|SOX4|HEY2	-2.82581	HBV_related
GO Biological Processes	19	GO:0071772	response to BMP	-4.35609	7.48449	6.31213	22539	170	124	7	5.64516	2.07257	1958|2627|4086|4092|6662|10140|51176	EGR1|GATA6|SMAD1|SMAD7|SOX9|TOB1|LEF1	-2.78813	HBV_related
GO Biological Processes	19	GO:0071773	cellular response to BMP stimulus	-4.35609	7.48449	6.31213	22539	170	124	7	5.64516	2.07257	1958|2627|4086|4092|6662|10140|51176	EGR1|GATA6|SMAD1|SMAD7|SOX9|TOB1|LEF1	-2.78813	HBV_related
GO Biological Processes	19	GO:0010566	regulation of ketone biosynthetic process	-4.3502	41.946	10.9835	22539	13	124	3	2.41935	1.37981	1958|10891|23408	EGR1|PPARGC1A|SIRT5	-2.78384	HBV_related
GO Biological Processes	19	GO:0008544	epidermis development	-4.32317	4.35605	5.40299	22539	459	124	11	8.87097	2.55331	2146|4097|4665|4831|5308|6304|6662|9079|9355|10626|23493	EZH2|MAFG|NAB2|NME2|PITX2|SATB1|SOX9|LDB2|LHX2|TRIM16|HEY2	-2.76238	HBV_related
GO Biological Processes	19	GO:0045727	positive regulation of translation	-4.31035	9.24235	6.67673	22539	118	124	6	4.83871	1.92701	602|2099|4869|6659|9611|22927	BCL3|ESR1|NPM1|SOX4|NCOR1|HABP4	-2.75351	HBV_related
Reactome Gene Sets	6	R-HSA-1989781	PPARA activates gene expression	-4.28983	9.16468	6.64192	22539	119	124	6	4.83871	1.92701	4862|4899|7004|9611|9971|10891	NPAS2|NRF1|TEAD4|NCOR1|NR1H4|PPARGC1A	-2.73688	HBV_related
GO Biological Processes	19	GO:0035019	somatic stem cell population maintenance	-4.286	12.4497	7.28774	22539	73	124	5	4.03226	1.76655	5440|6299|6659|6662|9079	POLR2K|SALL1|SOX4|SOX9|LDB2	-2.73581	HBV_related
Reactome Gene Sets	6	R-HSA-8864260	Transcriptional regulation by the AP-2 (TFAP2) family of transcription factors	-4.2539	19.1333	8.32082	22539	38	124	4	3.22581	1.58668	2099|4869|5308|7020	ESR1|NPM1|PITX2|TFAP2A	-2.71321	HBV_related
CORUM	33	CORUM:5611	Emerin complex 24	-4.24721	38.9499	10.5643	22539	14	124	3	2.41935	1.37981	4171|4173|4175	MCM2|MCM4|MCM6	-2.70803	HBV_related
GO Biological Processes	19	GO:0007183	SMAD protein complex assembly	-4.24721	38.9499	10.5643	22539	14	124	3	2.41935	1.37981	142|4086|4088	PARP1|SMAD1|SMAD3	-2.70803	HBV_related
GO Biological Processes	19	GO:0006913	nucleocytoplasmic transport	-4.23912	4.26317	5.31159	22539	469	124	11	8.87097	2.55331	142|473|602|4088|4601|4869|6628|6632|6659|10140|10921	PARP1|RERE|BCL3|SMAD3|MXI1|NPM1|SNRPB|SNRPD1|SOX4|TOB1|RNPS1	-2.70069	HBV_related
GO Biological Processes	19	GO:2001169	regulation of ATP biosynthetic process	-4.22946	12.1177	7.17303	22539	75	124	5	4.03226	1.76655	142|863|9611|10891|51085	PARP1|CBFA2T3|NCOR1|PPARGC1A|MLXIPL	-2.69475	HBV_related
Reactome Gene Sets	6	R-HSA-5619507	Activation of HOX genes during differentiation	-4.22938	8.93932	6.53994	22539	122	124	6	4.83871	1.92701	2146|5440|5931|7703|9611|9935	EZH2|POLR2K|RBBP7|PCGF2|NCOR1|MAFB	-2.69475	HBV_related
Reactome Gene Sets	6	R-HSA-400206	Regulation of lipid metabolism by Peroxisome proliferator-activated receptor alpha (PPARalpha)	-4.22938	8.93932	6.53994	22539	122	124	6	4.83871	1.92701	4862|4899|7004|9611|9971|10891	NPAS2|NRF1|TEAD4|NCOR1|NR1H4|PPARGC1A	-2.69475	HBV_related
Reactome Gene Sets	6	R-HSA-5617472	Activation of anterior HOX genes in hindbrain development during early embryogenesis	-4.22938	8.93932	6.53994	22539	122	124	6	4.83871	1.92701	2146|5440|5931|7703|9611|9935	EZH2|POLR2K|RBBP7|PCGF2|NCOR1|MAFB	-2.69475	HBV_related
GO Biological Processes	19	GO:0061448	connective tissue development	-4.2264	6.0088	5.82663	22539	242	124	8	6.45161	2.20618	1958|3202|4086|4088|4094|6662|9971|10891	EGR1|HOXA5|SMAD1|SMAD3|MAF|SOX9|NR1H4|PPARGC1A	-2.69394	HBV_related
GO Biological Processes	19	GO:2001251	negative regulation of chromosome organization	-4.2096	8.86664	6.50672	22539	123	124	6	4.83871	1.92701	142|672|3159|9232|9319|9700	PARP1|BRCA1|HMGA1|PTTG1|TRIP13|ESPL1	-2.68363	HBV_related
GO Biological Processes	19	GO:0033146	regulation of intracellular estrogen receptor signaling pathway	-4.20874	18.6427	8.20172	22539	39	124	4	3.22581	1.58668	142|367|672|2099	PARP1|AR|BRCA1|ESR1	-2.68363	HBV_related
GO Biological Processes	19	GO:2001020	regulation of response to DNA damage stimulus	-4.19892	7.06868	6.08	22539	180	124	7	5.64516	2.07257	142|672|2305|3090|4824|4862|22954	PARP1|BRCA1|FOXM1|HIC1|NKX3-1|NPAS2|TRIM32	-2.67744	HBV_related
KEGG Pathway	24	hsa04110	Cell cycle	-4.19	8.79514	6.47387	22539	124	124	6	4.83871	1.92701	4088|4171|4173|4175|9232|9700	SMAD3|MCM2|MCM4|MCM6|PTTG1|ESPL1	-2.67212	HBV_related
GO Biological Processes	19	GO:1901654	response to ketone	-4.18375	7.02963	6.05777	22539	181	124	7	5.64516	2.07257	142|367|687|2353|2354|4824|11335	PARP1|AR|KLF9|FOS|FOSB|NKX3-1|CBX3	-2.66944	HBV_related
GO Biological Processes	19	GO:0060412	ventricular septum morphogenesis	-4.16483	18.1766	8.08696	22539	40	124	4	3.22581	1.58668	4092|5308|6659|23493	SMAD7|PITX2|SOX4|HEY2	-2.65405	HBV_related
GO Biological Processes	19	GO:0003170	heart valve development	-4.16483	18.1766	8.08696	22539	40	124	4	3.22581	1.58668	5308|6659|6662|23493	PITX2|SOX4|SOX9|HEY2	-2.65405	HBV_related
Canonical Pathways	11	M176	PID FOXM1 PATHWAY	-4.16483	18.1766	8.08696	22539	40	124	4	3.22581	1.58668	675|2099|2305|2353	BRCA2|ESR1|FOXM1|FOS	-2.65405	HBV_related
GO Biological Processes	19	GO:0009749	response to glucose	-4.15371	6.9528	6.0138	22539	183	124	7	5.64516	2.07257	1958|6597|6659|8431|9971|10891|51085	EGR1|SMARCA4|SOX4|NR0B2|NR1H4|PPARGC1A|MLXIPL	-2.64505	HBV_related
GO Biological Processes	19	GO:2001170	negative regulation of ATP biosynthetic process	-4.15205	36.3532	10.1871	22539	15	124	3	2.41935	1.37981	142|863|10891	PARP1|CBFA2T3|PPARGC1A	-2.64408	HBV_related
GO Biological Processes	19	GO:0072401	signal transduction involved in DNA integrity checkpoint	-4.14768	11.6517	7.0089	22539	78	124	5	4.03226	1.76655	672|1820|4869|6659|79733	BRCA1|ARID3A|NPM1|SOX4|E2F8	-2.64164	HBV_related
GO Biological Processes	19	GO:0072422	signal transduction involved in DNA damage checkpoint	-4.14768	11.6517	7.0089	22539	78	124	5	4.03226	1.76655	672|1820|4869|6659|79733	BRCA1|ARID3A|NPM1|SOX4|E2F8	-2.64164	HBV_related
GO Biological Processes	19	GO:0072210	metanephric nephron development	-4.12209	17.7333	7.97628	22539	41	124	4	3.22581	1.58668	1958|6299|6662|6943	EGR1|SALL1|SOX9|TCF21	-2.62108	HBV_related
GO Biological Processes	19	GO:0035196	production of miRNAs involved in gene silencing by miRNA	-4.12209	17.7333	7.97628	22539	41	124	4	3.22581	1.58668	2099|4086|4088|9611	ESR1|SMAD1|SMAD3|NCOR1	-2.62108	HBV_related
GO Biological Processes	19	GO:0072395	signal transduction involved in cell cycle checkpoint	-4.12119	11.5042	6.95617	22539	79	124	5	4.03226	1.76655	672|1820|4869|6659|79733	BRCA1|ARID3A|NPM1|SOX4|E2F8	-2.62086	HBV_related
Canonical Pathways	11	M223	PID BETA CATENIN NUC PATHWAY	-4.09506	11.3604	6.90438	22539	80	124	5	4.03226	1.76655	367|5308|6597|7089|51176	AR|PITX2|SMARCA4|TLE2|LEF1	-2.60089	HBV_related
Reactome Gene Sets	6	R-HSA-3769402	Deactivation of the beta-catenin transactivating complex	-4.08047	17.3111	7.86944	22539	42	124	4	3.22581	1.58668	6659|6662|7089|51176	SOX4|SOX9|TLE2|LEF1	-2.58875	HBV_related
GO Biological Processes	19	GO:0009746	response to hexose	-4.08023	6.76789	5.90672	22539	188	124	7	5.64516	2.07257	1958|6597|6659|8431|9971|10891|51085	EGR1|SMARCA4|SOX4|NR0B2|NR1H4|PPARGC1A|MLXIPL	-2.58875	HBV_related
GO Biological Processes	19	GO:0048565	digestive tract development	-4.07601	8.38921	6.28431	22539	130	124	6	4.83871	1.92701	2627|3202|4088|5308|6299|6943	GATA6|HOXA5|SMAD3|PITX2|SALL1|TCF21	-2.58668	HBV_related
CORUM	33	CORUM:739	SIN3-ING1b complex II	-4.06362	34.0811	9.84525	22539	16	124	3	2.41935	1.37981	3621|5931|6597	ING1|RBBP7|SMARCA4	-2.57818	HBV_related
GO Biological Processes	19	GO:0044728	DNA methylation or demethylation	-4.01879	10.9498	6.75437	22539	83	124	5	4.03226	1.76655	142|672|2146|2353|54815	PARP1|BRCA1|EZH2|FOS|GATAD2A	-2.53995	HBV_related
GO Biological Processes	19	GO:0034284	response to monosaccharide	-4.00896	6.59255	5.80347	22539	193	124	7	5.64516	2.07257	1958|6597|6659|8431|9971|10891|51085	EGR1|SMARCA4|SOX4|NR0B2|NR1H4|PPARGC1A|MLXIPL	-2.53403	HBV_related
GO Biological Processes	19	GO:0060541	respiratory system development	-4.00896	6.59255	5.80347	22539	193	124	7	5.64516	2.07257	2627|3202|5308|6662|6943|9242|51176	GATA6|HOXA5|PITX2|SOX9|TCF21|MSC|LEF1	-2.53403	HBV_related
GO Biological Processes	19	GO:0030879	mammary gland development	-4.00326	8.13878	6.16458	22539	134	124	6	4.83871	1.92701	367|675|2099|3202|6662|51176	AR|BRCA2|ESR1|HOXA5|SOX9|LEF1	-2.53092	HBV_related
Reactome Gene Sets	6	R-HSA-2173793	Transcriptional activity of SMAD2/SMAD3:SMAD4 heterotrimer	-4.00036	16.5242	7.6664	22539	44	124	4	3.22581	1.58668	142|4088|4092|9611	PARP1|SMAD3|SMAD7|NCOR1	-2.52867	HBV_related
GO Biological Processes	19	GO:0031050	dsRNA fragmentation	-3.96178	16.157	7.56981	22539	45	124	4	3.22581	1.58668	2099|4086|4088|9611	ESR1|SMAD1|SMAD3|NCOR1	-2.49774	HBV_related
GO Biological Processes	19	GO:0070918	production of small RNA involved in gene silencing by RNA	-3.96178	16.157	7.56981	22539	45	124	4	3.22581	1.58668	2099|4086|4088|9611	ESR1|SMAD1|SMAD3|NCOR1	-2.49774	HBV_related
GO Biological Processes	19	GO:0031400	negative regulation of protein modification process	-3.93366	3.64748	4.88039	22539	598	124	12	9.67742	2.65502	672|2305|4092|4869|5187|6659|9611|10401|10614|10891|23410|51085	BRCA1|FOXM1|SMAD7|NPM1|PER1|SOX4|NCOR1|PIAS3|HEXIM1|PPARGC1A|SIRT3|MLXIPL	-2.47579	HBV_related
GO Biological Processes	19	GO:0001837	epithelial to mesenchymal transition	-3.93292	7.90288	6.04972	22539	138	124	6	4.83871	1.92701	2146|4088|4092|6662|23493|51176	EZH2|SMAD3|SMAD7|SOX9|HEY2|LEF1	-2.47579	HBV_related
GO Biological Processes	19	GO:0034250	positive regulation of cellular amide metabolic process	-3.93292	7.90288	6.04972	22539	138	124	6	4.83871	1.92701	602|2099|4869|6659|9611|22927	BCL3|ESR1|NPM1|SOX4|NCOR1|HABP4	-2.47579	HBV_related
GO Biological Processes	19	GO:1905114	cell surface receptor signaling pathway involved in cell-cell signaling	-3.91335	3.62927	4.8593	22539	601	124	12	9.67742	2.65502	1958|2099|3090|4088|5308|6299|6597|6659|6662|7089|10042|51176	EGR1|ESR1|HIC1|SMAD3|PITX2|SALL1|SMARCA4|SOX4|SOX9|TLE2|HMGXB4|LEF1	-2.46269	HBV_related
GO Biological Processes	19	GO:0045739	positive regulation of DNA repair	-3.88732	15.4695	7.38561	22539	47	124	4	3.22581	1.58668	142|672|2305|4862	PARP1|BRCA1|FOXM1|NPAS2	-2.44127	HBV_related
Reactome Gene Sets	6	R-HSA-1368108	BMAL1:CLOCK,NPAS2 activates circadian gene expression	-3.88732	15.4695	7.38561	22539	47	124	4	3.22581	1.58668	4862|5187|9611|10891	NPAS2|PER1|NCOR1|PPARGC1A	-2.44127	HBV_related
GO Biological Processes	19	GO:0001656	metanephros development	-3.87498	10.2116	6.4762	22539	89	124	5	4.03226	1.76655	1958|4824|6299|6662|6943	EGR1|NKX3-1|SALL1|SOX9|TCF21	-2.43093	HBV_related
GO Biological Processes	19	GO:0055123	digestive system development	-3.86485	7.68026	5.93939	22539	142	124	6	4.83871	1.92701	2627|3202|4088|5308|6299|6943	GATA6|HOXA5|SMAD3|PITX2|SALL1|TCF21	-2.42602	HBV_related
GO Biological Processes	19	GO:1903578	regulation of ATP metabolic process	-3.85206	10.0981	6.43241	22539	90	124	5	4.03226	1.76655	142|863|9611|10891|51085	PARP1|CBFA2T3|NCOR1|PPARGC1A|MLXIPL	-2.4168	HBV_related
GO Biological Processes	19	GO:0050678	regulation of epithelial cell proliferation	-3.83424	4.64743	5.12989	22539	352	124	9	7.25806	2.3299	367|675|687|3148|3202|4088|4824|4831|6662	AR|BRCA2|KLF9|HMGB2|HOXA5|SMAD3|NKX3-1|NME2|SOX9	-2.40194	HBV_related
KEGG Pathway	24	hsa05224	Breast cancer	-3.83162	7.57359	5.88583	22539	144	124	6	4.83871	1.92701	672|675|2099|2353|23493|51176	BRCA1|BRCA2|ESR1|FOS|HEY2|LEF1	-2.40194	HBV_related
GO Biological Processes	19	GO:0061377	mammary gland lobule development	-3.83072	28.6999	8.98401	22539	19	124	3	2.41935	1.37981	367|2099|3202	AR|ESR1|HOXA5	-2.40194	HBV_related
GO Biological Processes	19	GO:0060438	trachea development	-3.83072	28.6999	8.98401	22539	19	124	3	2.41935	1.37981	3202|6662|51176	HOXA5|SOX9|LEF1	-2.40194	HBV_related
GO Biological Processes	19	GO:0060749	mammary gland alveolus development	-3.83072	28.6999	8.98401	22539	19	124	3	2.41935	1.37981	367|2099|3202	AR|ESR1|HOXA5	-2.40194	HBV_related
GO Biological Processes	19	GO:0006978	DNA damage response, signal transduction by p53 class mediator resulting in transcription of p21 cla	-3.83072	28.6999	8.98401	22539	19	124	3	2.41935	1.37981	672|675|2305	BRCA1|BRCA2|FOXM1	-2.40194	HBV_related
GO Biological Processes	19	GO:0043583	ear development	-3.82028	6.14668	5.53284	22539	207	124	7	5.64516	2.07257	4094|4171|6299|6662|7020|9935|23493	MAF|MCM2|SALL1|SOX9|TFAP2A|MAFB|HEY2	-2.39382	HBV_related
GO Biological Processes	19	GO:0030850	prostate gland development	-3.81624	14.8381	7.21236	22539	49	124	4	3.22581	1.58668	367|2099|4824|6662	AR|ESR1|NKX3-1|SOX9	-2.39104	HBV_related
GO Biological Processes	19	GO:0030902	hindbrain development	-3.81521	7.52136	5.85943	22539	145	124	6	4.83871	1.92701	473|2146|4086|9935|10891|51176	RERE|EZH2|SMAD1|MAFB|PPARGC1A|LEF1	-2.39104	HBV_related
GO Biological Processes	19	GO:0048705	skeletal system morphogenesis	-3.79454	6.08786	5.49621	22539	209	124	7	5.64516	2.07257	3202|3217|4088|4665|6662|7020|7703	HOXA5|HOXB7|SMAD3|NAB2|SOX9|TFAP2A|PCGF2	-2.37415	HBV_related
GO Biological Processes	19	GO:0009314	response to radiation	-3.78659	4.13105	4.9332	22539	440	124	10	8.06452	2.44523	142|602|672|675|1958|2353|2547|4869|5187|22954	PARP1|BCL3|BRCA1|BRCA2|EGR1|FOS|XRCC6|NPM1|PER1|TRIM32	-2.37046	HBV_related
GO Biological Processes	19	GO:0060993	kidney morphogenesis	-3.78495	9.77237	6.30505	22539	93	124	5	4.03226	1.76655	3217|6299|6659|6662|6943	HOXB7|SALL1|SOX4|SOX9|TCF21	-2.36995	HBV_related
GO Biological Processes	19	GO:0048704	embryonic skeletal system morphogenesis	-3.78495	9.77237	6.30505	22539	93	124	5	4.03226	1.76655	3202|3217|4088|7020|7703	HOXA5|HOXB7|SMAD3|TFAP2A|PCGF2	-2.36995	HBV_related
GO Biological Processes	19	GO:0006323	DNA packaging	-3.78177	6.05887	5.47807	22539	210	124	7	5.64516	2.07257	3148|3159|4171|4676|4869|5931|6662	HMGB2|HMGA1|MCM2|NAP1L4|NPM1|RBBP7|SOX9	-2.36734	HBV_related
GO Biological Processes	19	GO:0001568	blood vessel development	-3.77813	3.29103	4.64039	22539	718	124	13	10.4839	2.75106	672|1958|2627|3202|4086|4092|4824|5308|6659|6943|23493|51176|79733	BRCA1|EGR1|GATA6|HOXA5|SMAD1|SMAD7|NKX3-1|PITX2|SOX4|TCF21|HEY2|LEF1|E2F8	-2.36426	HBV_related
GO Biological Processes	19	GO:0071695	anatomical structure maturation	-3.76672	7.3689	5.78173	22539	148	124	6	4.83871	1.92701	473|675|3202|9319|23294|53335	RERE|BRCA2|HOXA5|TRIP13|ANKS1A|BCL11A	-2.35454	HBV_related
GO Biological Processes	19	GO:0035107	appendage morphogenesis	-3.76672	7.3689	5.78173	22539	148	124	6	4.83871	1.92701	5308|6299|6659|6662|7020|51176	PITX2|SALL1|SOX4|SOX9|TFAP2A|LEF1	-2.35454	HBV_related
GO Biological Processes	19	GO:0035108	limb morphogenesis	-3.76672	7.3689	5.78173	22539	148	124	6	4.83871	1.92701	5308|6299|6659|6662|7020|51176	PITX2|SALL1|SOX4|SOX9|TFAP2A|LEF1	-2.35454	HBV_related
GO Biological Processes	19	GO:0042772	DNA damage response, signal transduction resulting in transcription	-3.76189	27.2649	8.74009	22539	20	124	3	2.41935	1.37981	672|675|2305	BRCA1|BRCA2|FOXM1	-2.35251	HBV_related
Reactome Gene Sets	6	R-HSA-3232118	SUMOylation of transcription factors	-3.76189	27.2649	8.74009	22539	20	124	3	2.41935	1.37981	3090|7020|10401	HIC1|TFAP2A|PIAS3	-2.35251	HBV_related
GO Biological Processes	19	GO:0006334	nucleosome assembly	-3.75081	7.31944	5.75631	22539	149	124	6	4.83871	1.92701	3148|4171|4676|4869|5931|6662	HMGB2|MCM2|NAP1L4|NPM1|RBBP7|SOX9	-2.34366	HBV_related
GO Biological Processes	19	GO:0043392	negative regulation of DNA binding	-3.74824	14.2562	7.04899	22539	51	124	4	3.22581	1.58668	9355|22927|23493|51176	LHX2|HABP4|HEY2|LEF1	-2.3422	HBV_related
Reactome Gene Sets	6	R-HSA-1592230	Mitochondrial biogenesis	-3.74153	9.56664	6.22331	22539	95	124	5	4.03226	1.76655	4899|9611|10891|23408|23410	NRF1|NCOR1|PPARGC1A|SIRT5|SIRT3	-2.33604	HBV_related
GO Biological Processes	19	GO:0009743	response to carbohydrate	-3.73143	5.94562	5.40669	22539	214	124	7	5.64516	2.07257	1958|6597|6659|8431|9971|10891|51085	EGR1|SMARCA4|SOX4|NR0B2|NR1H4|PPARGC1A|MLXIPL	-2.32815	HBV_related
GO Biological Processes	19	GO:0007507	heart development	-3.72897	3.73028	4.75825	22539	536	124	11	8.87097	2.55331	2627|4086|4088|4092|4824|5308|6299|6659|6662|10614|23493	GATA6|SMAD1|SMAD3|SMAD7|NKX3-1|PITX2|SALL1|SOX4|SOX9|HEXIM1|HEY2	-2.32624	HBV_related
GO Biological Processes	19	GO:0030856	regulation of epithelial cell differentiation	-3.71934	7.2225	5.70617	22539	151	124	6	4.83871	1.92701	2146|4097|4831|6662|10626|23493	EZH2|MAFG|NME2|SOX9|TRIM16|HEY2	-2.31826	HBV_related
GO Biological Processes	19	GO:0060425	lung morphogenesis	-3.71532	13.982	6.97071	22539	52	124	4	3.22581	1.58668	3202|5308|6662|6943	HOXA5|PITX2|SOX9|TCF21	-2.31547	HBV_related
GO Biological Processes	19	GO:0007184	SMAD protein import into nucleus	-3.69669	25.9666	8.5134	22539	21	124	3	2.41935	1.37981	142|4088|10140	PARP1|SMAD3|TOB1	-2.3032	HBV_related
GO Biological Processes	19	GO:0009206	purine ribonucleoside triphosphate biosynthetic process	-3.68835	7.12808	5.65694	22539	153	124	6	4.83871	1.92701	142|863|4831|9611|10891|51085	PARP1|CBFA2T3|NME2|NCOR1|PPARGC1A|MLXIPL	-2.29659	HBV_related
Reactome Gene Sets	6	R-HSA-3700989	Transcriptional Regulation by TP53	-3.68163	4.43332	4.94588	22539	369	124	9	7.25806	2.3299	672|1820|2353|4869|5440|5931|51230|54815|79733	BRCA1|ARID3A|FOS|NPM1|POLR2K|RBBP7|PHF20|GATAD2A|E2F8	-2.29136	HBV_related
GO Biological Processes	19	GO:0043331	response to dsRNA	-3.67827	9.27378	6.10513	22539	98	124	5	4.03226	1.76655	2099|4086|4088|4869|9611	ESR1|SMAD1|SMAD3|NPM1|NCOR1	-2.2896	HBV_related
GO Biological Processes	19	GO:0003300	cardiac muscle hypertrophy	-3.67827	9.27378	6.10513	22539	98	124	5	4.03226	1.76655	142|2146|2627|4088|23493	PARP1|EZH2|GATA6|SMAD3|HEY2	-2.2896	HBV_related
GO Biological Processes	19	GO:0042752	regulation of circadian rhythm	-3.67827	9.27378	6.10513	22539	98	124	5	4.03226	1.76655	2146|5187|8863|10891|79723	EZH2|PER1|PER3|PPARGC1A|SUV39H2	-2.2896	HBV_related
GO Biological Processes	19	GO:0009145	purine nucleoside triphosphate biosynthetic process	-3.67302	7.0818	5.63265	22539	154	124	6	4.83871	1.92701	142|863|4831|9611|10891|51085	PARP1|CBFA2T3|NME2|NCOR1|PPARGC1A|MLXIPL	-2.28489	HBV_related
GO Biological Processes	19	GO:0006476	protein deacetylation	-3.65766	9.18011	6.06687	22539	99	124	5	4.03226	1.76655	5187|5931|6299|23408|23410	PER1|RBBP7|SALL1|SIRT5|SIRT3	-2.27164	HBV_related
GO Biological Processes	19	GO:0010332	response to gamma radiation	-3.65149	13.4642	6.82044	22539	54	124	4	3.22581	1.58668	142|675|1958|2547	PARP1|BRCA2|EGR1|XRCC6	-2.26601	HBV_related
GO Biological Processes	19	GO:0014897	striated muscle hypertrophy	-3.63728	9.08831	6.02913	22539	100	124	5	4.03226	1.76655	142|2146|2627|4088|23493	PARP1|EZH2|GATA6|SMAD3|HEY2	-2.25705	HBV_related
GO Biological Processes	19	GO:0060487	lung epithelial cell differentiation	-3.63476	24.7863	8.30199	22539	22	124	3	2.41935	1.37981	2627|3202|6662	GATA6|HOXA5|SOX9	-2.25533	HBV_related
GO Biological Processes	19	GO:0051170	nuclear import	-3.63405	4.92925	5.05258	22539	295	124	8	6.45161	2.20618	142|473|602|4088|4601|6628|6632|10140	PARP1|RERE|BCL3|SMAD3|MXI1|SNRPB|SNRPD1|TOB1	-2.25533	HBV_related
GO Biological Processes	19	GO:0030217	T cell differentiation	-3.63397	5.73136	5.26919	22539	222	124	7	5.64516	2.07257	602|1958|4092|6304|6659|9935|51176	BCL3|EGR1|SMAD7|SATB1|SOX4|MAFB|LEF1	-2.25533	HBV_related
GO Biological Processes	19	GO:0001944	vasculature development	-3.63348	3.1803	4.49491	22539	743	124	13	10.4839	2.75106	672|1958|2627|3202|4086|4092|4824|5308|6659|6943|23493|51176|79733	BRCA1|EGR1|GATA6|HOXA5|SMAD1|SMAD7|NKX3-1|PITX2|SOX4|TCF21|HEY2|LEF1|E2F8	-2.25533	HBV_related
GO Biological Processes	19	GO:0098727	maintenance of cell number	-3.62773	6.94648	5.56108	22539	157	124	6	4.83871	1.92701	2146|5440|6299|6659|6662|9079	EZH2|POLR2K|SALL1|SOX4|SOX9|LDB2	-2.2501	HBV_related
GO Biological Processes	19	GO:0032922	circadian regulation of gene expression	-3.62054	13.2194	6.74826	22539	55	124	4	3.22581	1.58668	4862|5187|8863|10891	NPAS2|PER1|PER3|PPARGC1A	-2.2455	HBV_related
GO Biological Processes	19	GO:2000378	negative regulation of reactive oxygen species metabolic process	-3.62054	13.2194	6.74826	22539	55	124	4	3.22581	1.58668	672|7020|23408|23410	BRCA1|TFAP2A|SIRT5|SIRT3	-2.2455	HBV_related
GO Biological Processes	19	GO:0003205	cardiac chamber development	-3.61285	6.90251	5.53764	22539	158	124	6	4.83871	1.92701	2627|4092|5308|6299|6659|23493	GATA6|SMAD7|PITX2|SALL1|SOX4|HEY2	-2.23935	HBV_related
GO Biological Processes	19	GO:0030509	BMP signaling pathway	-3.61285	6.90251	5.53764	22539	158	124	6	4.83871	1.92701	1958|2627|4086|4092|10140|51176	EGR1|GATA6|SMAD1|SMAD7|TOB1|LEF1	-2.23935	HBV_related
GO Biological Processes	19	GO:0009201	ribonucleoside triphosphate biosynthetic process	-3.59808	6.8591	5.5144	22539	159	124	6	4.83871	1.92701	142|863|4831|9611|10891|51085	PARP1|CBFA2T3|NME2|NCOR1|PPARGC1A|MLXIPL	-2.22779	HBV_related
GO Biological Processes	19	GO:0008630	intrinsic apoptotic signaling pathway in response to DNA damage	-3.5972	8.9101	5.95524	22539	102	124	5	4.03226	1.76655	602|672|675|3090|22954	BCL3|BRCA1|BRCA2|HIC1|TRIM32	-2.22779	HBV_related
GO Biological Processes	19	GO:0014896	muscle hypertrophy	-3.5972	8.9101	5.95524	22539	102	124	5	4.03226	1.76655	142|2146|2627|4088|23493	PARP1|EZH2|GATA6|SMAD3|HEY2	-2.22779	HBV_related
Reactome Gene Sets	6	R-HSA-9006936	Signaling by TGF-beta family members	-3.5972	8.9101	5.95524	22539	102	124	5	4.03226	1.76655	142|4086|4088|4092|9611	PARP1|SMAD1|SMAD3|SMAD7|NCOR1	-2.22779	HBV_related
GO Biological Processes	19	GO:0072358	cardiovascular system development	-3.58858	3.14642	4.44964	22539	751	124	13	10.4839	2.75106	672|1958|2627|3202|4086|4092|4824|5308|6659|6943|23493|51176|79733	BRCA1|EGR1|GATA6|HOXA5|SMAD1|SMAD7|NKX3-1|PITX2|SOX4|TCF21|HEY2|LEF1|E2F8	-2.2207	HBV_related
GO Biological Processes	19	GO:0060479	lung cell differentiation	-3.57581	23.7086	8.10417	22539	23	124	3	2.41935	1.37981	2627|3202|6662	GATA6|HOXA5|SOX9	-2.21046	HBV_related
GO Biological Processes	19	GO:0007530	sex determination	-3.57581	23.7086	8.10417	22539	23	124	3	2.41935	1.37981	367|6662|6943	AR|SOX9|TCF21	-2.21046	HBV_related
Reactome Gene Sets	6	R-HSA-2173795	Downregulation of SMAD2/3:SMAD4 transcriptional activity	-3.57581	23.7086	8.10417	22539	23	124	3	2.41935	1.37981	142|4088|9611	PARP1|SMAD3|NCOR1	-2.21046	HBV_related
GO Biological Processes	19	GO:0060395	SMAD protein signal transduction	-3.56044	12.7555	6.60938	22539	57	124	4	3.22581	1.58668	2353|4086|4088|10923	FOS|SMAD1|SMAD3|SUB1	-2.2006	HBV_related
GO Biological Processes	19	GO:1900543	negative regulation of purine nucleotide metabolic process	-3.56044	12.7555	6.60938	22539	57	124	4	3.22581	1.58668	142|863|10891|51085	PARP1|CBFA2T3|PPARGC1A|MLXIPL	-2.2006	HBV_related
GO Biological Processes	19	GO:0042326	negative regulation of phosphorylation	-3.54255	3.85098	4.65578	22539	472	124	10	8.06452	2.44523	863|2305|4092|4869|5187|9611|10614|10891|23410|51085	CBFA2T3|FOXM1|SMAD7|NPM1|PER1|NCOR1|HEXIM1|PPARGC1A|SIRT3|MLXIPL	-2.18565	HBV_related
GO Biological Processes	19	GO:0071560	cellular response to transforming growth factor beta stimulus	-3.54057	5.53201	5.13824	22539	230	124	7	5.64516	2.07257	142|2353|4086|4088|4092|6662|10891	PARP1|FOS|SMAD1|SMAD3|SMAD7|SOX9|PPARGC1A	-2.18565	HBV_related
GO Biological Processes	19	GO:0007519	skeletal muscle tissue development	-3.54005	6.69078	5.42342	22539	163	124	6	4.83871	1.92701	1958|2353|3131|5308|6943|9242	EGR1|FOS|HLF|PITX2|TCF21|MSC	-2.18565	HBV_related
GO Biological Processes	19	GO:0006304	DNA modification	-3.53869	8.65553	5.84811	22539	105	124	5	4.03226	1.76655	142|672|2146|2353|54815	PARP1|BRCA1|EZH2|FOS|GATAD2A	-2.18479	HBV_related
GO Biological Processes	19	GO:0030520	intracellular estrogen receptor signaling pathway	-3.53124	12.5356	6.54252	22539	58	124	4	3.22581	1.58668	142|367|672|2099	PARP1|AR|BRCA1|ESR1	-2.17979	HBV_related
GO Biological Processes	19	GO:0045980	negative regulation of nucleotide metabolic process	-3.53124	12.5356	6.54252	22539	58	124	4	3.22581	1.58668	142|863|10891|51085	PARP1|CBFA2T3|PPARGC1A|MLXIPL	-2.17979	HBV_related
GO Biological Processes	19	GO:0034248	regulation of cellular amide metabolic process	-3.52154	3.28988	4.45129	22539	663	124	12	9.67742	2.65502	602|2099|4086|4088|4869|5187|5440|6659|9611|9971|10140|22927	BCL3|ESR1|SMAD1|SMAD3|NPM1|PER1|POLR2K|SOX4|NCOR1|NR1H4|TOB1|HABP4	-2.17106	HBV_related
GO Biological Processes	19	GO:0006266	DNA ligation	-3.51956	22.7208	7.91852	22539	24	124	3	2.41935	1.37981	142|2547|3148	PARP1|XRCC6|HMGB2	-2.17103	HBV_related
Reactome Gene Sets	6	R-HSA-8940973	RUNX2 regulates osteoblast differentiation	-3.51956	22.7208	7.91852	22539	24	124	3	2.41935	1.37981	367|4094|23493	AR|MAF|HEY2	-2.17103	HBV_related
GO Biological Processes	19	GO:0003171	atrioventricular valve development	-3.51956	22.7208	7.91852	22539	24	124	3	2.41935	1.37981	5308|6659|23493	PITX2|SOX4|HEY2	-2.17103	HBV_related
GO Biological Processes	19	GO:0060969	negative regulation of gene silencing	-3.51956	22.7208	7.91852	22539	24	124	3	2.41935	1.37981	2099|3159|9611	ESR1|HMGA1|NCOR1	-2.17103	HBV_related
GO Biological Processes	19	GO:0007093	mitotic cell cycle checkpoint	-3.51164	6.60968	5.37907	22539	165	124	6	4.83871	1.92701	672|1820|4869|6659|9319|79733	BRCA1|ARID3A|NPM1|SOX4|TRIP13|E2F8	-2.16505	HBV_related
GO Biological Processes	19	GO:0010565	regulation of cellular ketone metabolic process	-3.51164	6.60968	5.37907	22539	165	124	6	4.83871	1.92701	672|1958|9971|10891|23408|51085	BRCA1|EGR1|NR1H4|PPARGC1A|SIRT5|MLXIPL	-2.16505	HBV_related
Canonical Pathways	11	M166	PID ATF2 PATHWAY	-3.50259	12.3231	6.47729	22539	59	124	4	3.22581	1.58668	672|2099|2353|10891	BRCA1|ESR1|FOS|PPARGC1A	-2.15937	HBV_related
GO Biological Processes	19	GO:0001658	branching involved in ureteric bud morphogenesis	-3.50259	12.3231	6.47729	22539	59	124	4	3.22581	1.58668	3217|6299|6662|6943	HOXB7|SALL1|SOX9|TCF21	-2.15937	HBV_related
GO Biological Processes	19	GO:0071363	cellular response to growth factor stimulus	-3.49796	3.27016	4.42663	22539	667	124	12	9.67742	2.65502	142|1958|2353|2627|4086|4088|4092|5440|6662|10140|10891|51176	PARP1|EGR1|FOS|GATA6|SMAD1|SMAD3|SMAD7|POLR2K|SOX9|TOB1|PPARGC1A|LEF1	-2.15616	HBV_related
GO Biological Processes	19	GO:0071559	response to transforming growth factor beta	-3.4953	5.43745	5.07504	22539	234	124	7	5.64516	2.07257	142|2353|4086|4088|4092|6662|10891	PARP1|FOS|SMAD1|SMAD3|SMAD7|SOX9|PPARGC1A	-2.15399	HBV_related
GO Biological Processes	19	GO:0002521	leukocyte differentiation	-3.48484	3.78679	4.5902	22539	480	124	10	8.06452	2.44523	142|602|863|1958|2353|4092|6304|6659|9935|51176	PARP1|BCL3|CBFA2T3|EGR1|FOS|SMAD7|SATB1|SOX4|MAFB|LEF1	-2.14543	HBV_related
GO Biological Processes	19	GO:0016049	cell growth	-3.48484	3.78679	4.5902	22539	480	124	10	8.06452	2.44523	367|3621|4088|5931|6597|6662|9355|22954|51176|53335	AR|ING1|SMAD3|RBBP7|SMARCA4|SOX9|LHX2|TRIM32|LEF1|BCL11A	-2.14543	HBV_related
GO Biological Processes	19	GO:1901991	negative regulation of mitotic cell cycle phase transition	-3.48413	5.41431	5.05946	22539	235	124	7	5.64516	2.07257	672|1820|2146|4869|6659|9319|79733	BRCA1|ARID3A|EZH2|NPM1|SOX4|TRIP13|E2F8	-2.14519	HBV_related
GO Biological Processes	19	GO:0046890	regulation of lipid biosynthetic process	-3.48363	6.53052	5.33545	22539	167	124	6	4.83871	1.92701	672|1958|9971|10891|23541|51085	BRCA1|EGR1|NR1H4|PPARGC1A|SEC14L2|MLXIPL	-2.14517	HBV_related
Canonical Pathways	11	M32	PID HDAC CLASSIII PATHWAY	-3.46579	21.8119	7.74382	22539	25	124	3	2.41935	1.37981	2547|10891|23410	XRCC6|PPARGC1A|SIRT3	-2.13157	HBV_related
GO Biological Processes	19	GO:0035601	protein deacylation	-3.46353	8.3379	5.71175	22539	109	124	5	4.03226	1.76655	5187|5931|6299|23408|23410	PER1|RBBP7|SALL1|SIRT5|SIRT3	-2.13072	HBV_related
GO Biological Processes	19	GO:0007346	regulation of mitotic cell cycle	-3.46293	3.241	4.39	22539	673	124	12	9.67742	2.65502	672|675|1820|2146|4088|4824|4869|6659|9232|9319|9700|79733	BRCA1|BRCA2|ARID3A|EZH2|SMAD3|NKX3-1|NPM1|SOX4|PTTG1|TRIP13|ESPL1|E2F8	-2.13064	HBV_related
GO Biological Processes	19	GO:0098732	macromolecule deacylation	-3.44522	8.2621	5.67875	22539	110	124	5	4.03226	1.76655	5187|5931|6299|23408|23410	PER1|RBBP7|SALL1|SIRT5|SIRT3	-2.11614	HBV_related
GO Biological Processes	19	GO:0009142	nucleoside triphosphate biosynthetic process	-3.44234	6.41528	5.27134	22539	170	124	6	4.83871	1.92701	142|863|4831|9611|10891|51085	PARP1|CBFA2T3|NME2|NCOR1|PPARGC1A|MLXIPL	-2.11418	HBV_related
GO Biological Processes	19	GO:0003007	heart morphogenesis	-3.4291	5.30151	4.98291	22539	240	124	7	5.64516	2.07257	2627|4088|4092|5308|6659|6662|23493	GATA6|SMAD3|SMAD7|PITX2|SOX4|SOX9|HEY2	-2.10404	HBV_related
GO Biological Processes	19	GO:0060538	skeletal muscle organ development	-3.42876	6.37776	5.25031	22539	171	124	6	4.83871	1.92701	1958|2353|3131|5308|6943|9242	EGR1|FOS|HLF|PITX2|TCF21|MSC	-2.10404	HBV_related
GO Biological Processes	19	GO:0002065	columnar/cuboidal epithelial cell differentiation	-3.4271	8.18766	5.64616	22539	111	124	5	4.03226	1.76655	2627|3202|6659|23493|51176	GATA6|HOXA5|SOX4|HEY2|LEF1	-2.10396	HBV_related
GO Biological Processes	19	GO:0006977	DNA damage response, signal transduction by p53 class mediator resulting in cell cycle arrest	-3.41973	11.7268	6.29068	22539	62	124	4	3.22581	1.58668	1820|4869|6659|79733	ARID3A|NPM1|SOX4|E2F8	-2.09801	HBV_related
GO Biological Processes	19	GO:0035265	organ growth	-3.41527	6.34068	5.22945	22539	172	124	6	4.83871	1.92701	367|2099|2627|4086|6662|23493	AR|ESR1|GATA6|SMAD1|SOX9|HEY2	-2.09446	HBV_related
CORUM	33	CORUM:2825	BRCA1-RNA polymerase II complex	-3.41429	20.973	7.57902	22539	26	124	3	2.41935	1.37981	672|2960|5440	BRCA1|GTF2E1|POLR2K	-2.0944	HBV_related
GO Biological Processes	19	GO:0033598	mammary gland epithelial cell proliferation	-3.41429	20.973	7.57902	22539	26	124	3	2.41935	1.37981	675|2099|3202	BRCA2|ESR1|HOXA5	-2.0944	HBV_related
GO Biological Processes	19	GO:2000377	regulation of reactive oxygen species metabolic process	-3.40187	6.30403	5.20875	22539	173	124	6	4.83871	1.92701	672|2305|4088|7020|23408|23410	BRCA1|FOXM1|SMAD3|TFAP2A|SIRT5|SIRT3	-2.08424	HBV_related
GO Biological Processes	19	GO:0051091	positive regulation of DNA binding transcription factor activity	-3.39673	5.23606	4.938	22539	243	124	7	5.64516	2.07257	367|2099|4869|6597|10891|11074|22954	AR|ESR1|NPM1|SMARCA4|PPARGC1A|TRIM31|TRIM32	-2.0809	HBV_related
GO Biological Processes	19	GO:1902400	intracellular signal transduction involved in G1 DNA damage checkpoint	-3.39308	11.5407	6.23131	22539	63	124	4	3.22581	1.58668	1820|4869|6659|79733	ARID3A|NPM1|SOX4|E2F8	-2.07815	HBV_related
GO Biological Processes	19	GO:0072431	signal transduction involved in mitotic G1 DNA damage checkpoint	-3.39308	11.5407	6.23131	22539	63	124	4	3.22581	1.58668	1820|4869|6659|79733	ARID3A|NPM1|SOX4|E2F8	-2.07815	HBV_related
GO Biological Processes	19	GO:0097190	apoptotic signaling pathway	-3.38677	3.40039	4.38674	22539	588	124	11	8.87097	2.55331	142|367|602|672|675|3090|3148|4088|4824|7703|22954	PARP1|AR|BCL3|BRCA1|BRCA2|HIC1|HMGB2|SMAD3|NKX3-1|PCGF2|TRIM32	-2.07229	HBV_related
GO Biological Processes	19	GO:0006479	protein methylation	-3.37535	6.23198	5.16785	22539	175	124	6	4.83871	1.92701	672|2146|6304|6628|9971|79723	BRCA1|EZH2|SATB1|SNRPB|NR1H4|SUV39H2	-2.06577	HBV_related
GO Biological Processes	19	GO:0048736	appendage development	-3.37535	6.23198	5.16785	22539	175	124	6	4.83871	1.92701	5308|6299|6659|6662|7020|51176	PITX2|SALL1|SOX4|SOX9|TFAP2A|LEF1	-2.06577	HBV_related
GO Biological Processes	19	GO:0060173	limb development	-3.37535	6.23198	5.16785	22539	175	124	6	4.83871	1.92701	5308|6299|6659|6662|7020|51176	PITX2|SALL1|SOX4|SOX9|TFAP2A|LEF1	-2.06577	HBV_related
GO Biological Processes	19	GO:0008213	protein alkylation	-3.37535	6.23198	5.16785	22539	175	124	6	4.83871	1.92701	672|2146|6304|6628|9971|79723	BRCA1|EZH2|SATB1|SNRPB|NR1H4|SUV39H2	-2.06577	HBV_related
GO Biological Processes	19	GO:0043367	CD4-positive, alpha-beta T cell differentiation	-3.36689	11.3604	6.17327	22539	64	124	4	3.22581	1.58668	602|4092|6304|51176	BCL3|SMAD7|SATB1|LEF1	-2.06041	HBV_related
Canonical Pathways	11	M200	PID ERA GENOMIC PATHWAY	-3.36689	11.3604	6.17327	22539	64	124	4	3.22581	1.58668	672|2099|8431|9611	BRCA1|ESR1|NR0B2|NCOR1	-2.06041	HBV_related
GO Biological Processes	19	GO:0014031	mesenchymal cell development	-3.36689	11.3604	6.17327	22539	64	124	4	3.22581	1.58668	5308|6662|23493|51176	PITX2|SOX9|HEY2|LEF1	-2.06041	HBV_related
GO Biological Processes	19	GO:0060675	ureteric bud morphogenesis	-3.36689	11.3604	6.17327	22539	64	124	4	3.22581	1.58668	3217|6299|6662|6943	HOXB7|SALL1|SOX9|TCF21	-2.06041	HBV_related
Reactome Gene Sets	6	R-HSA-1368082	RORA activates gene expression	-3.36488	20.1962	7.42318	22539	27	124	3	2.41935	1.37981	4862|9611|10891	NPAS2|NCOR1|PPARGC1A	-2.05928	HBV_related
GO Biological Processes	19	GO:0006359	regulation of transcription by RNA polymerase III	-3.36488	20.1962	7.42318	22539	27	124	3	2.41935	1.37981	367|672|4665	AR|BRCA1|NAB2	-2.05928	HBV_related
GO Biological Processes	19	GO:0001819	positive regulation of cytokine production	-3.36237	4.00955	4.56278	22539	408	124	9	7.25806	2.3299	602|672|1958|2547|3148|4088|5440|10626|22954	BCL3|BRCA1|EGR1|XRCC6|HMGB2|SMAD3|POLR2K|TRIM16|TRIM32	-2.05721	HBV_related
GO Biological Processes	19	GO:2000134	negative regulation of G1/S transition of mitotic cell cycle	-3.35641	7.90288	5.51978	22539	115	124	5	4.03226	1.76655	1820|2146|4869|6659|79733	ARID3A|EZH2|NPM1|SOX4|E2F8	-2.05519	HBV_related
GO Biological Processes	19	GO:0070848	response to growth factor	-3.34362	3.14293	4.26492	22539	694	124	12	9.67742	2.65502	142|1958|2353|2627|4086|4088|4092|5440|6662|10140|10891|51176	PARP1|EGR1|FOS|GATA6|SMAD1|SMAD3|SMAD7|POLR2K|SOX9|TOB1|PPARGC1A|LEF1	-2.0448	HBV_related
GO Biological Processes	19	GO:1902402	signal transduction involved in mitotic DNA damage checkpoint	-3.34114	11.1856	6.11649	22539	65	124	4	3.22581	1.58668	1820|4869|6659|79733	ARID3A|NPM1|SOX4|E2F8	-2.04468	HBV_related
GO Biological Processes	19	GO:1902403	signal transduction involved in mitotic DNA integrity checkpoint	-3.34114	11.1856	6.11649	22539	65	124	4	3.22581	1.58668	1820|4869|6659|79733	ARID3A|NPM1|SOX4|E2F8	-2.04468	HBV_related
GO Biological Processes	19	GO:0061035	regulation of cartilage development	-3.34114	11.1856	6.11649	22539	65	124	4	3.22581	1.58668	4086|4088|4094|6662	SMAD1|SMAD3|MAF|SOX9	-2.04468	HBV_related
GO Biological Processes	19	GO:0072171	mesonephric tubule morphogenesis	-3.34114	11.1856	6.11649	22539	65	124	4	3.22581	1.58668	3217|6299|6662|6943	HOXB7|SALL1|SOX9|TCF21	-2.04468	HBV_related
GO Biological Processes	19	GO:0072413	signal transduction involved in mitotic cell cycle checkpoint	-3.34114	11.1856	6.11649	22539	65	124	4	3.22581	1.58668	1820|4869|6659|79733	ARID3A|NPM1|SOX4|E2F8	-2.04468	HBV_related
GO Biological Processes	19	GO:0046631	alpha-beta T cell activation	-3.33917	7.83475	5.48913	22539	116	124	5	4.03226	1.76655	602|2000|4092|6304|51176	BCL3|ELF4|SMAD7|SATB1|LEF1	-2.04357	HBV_related
GO Biological Processes	19	GO:0006165	nucleoside diphosphate phosphorylation	-3.3221	7.76778	5.45885	22539	117	124	5	4.03226	1.76655	863|4831|9611|10891|51085	CBFA2T3|NME2|NCOR1|PPARGC1A|MLXIPL	-2.02986	HBV_related
GO Biological Processes	19	GO:0060260	regulation of transcription initiation from RNA polymerase II promoter	-3.3174	19.4749	7.27552	22539	28	124	3	2.41935	1.37981	2099|10923|23493	ESR1|SUB1|HEY2	-2.02564	HBV_related
GO Biological Processes	19	GO:0051145	smooth muscle cell differentiation	-3.31583	11.0161	6.06095	22539	66	124	4	3.22581	1.58668	2627|5308|6662|23493	GATA6|PITX2|SOX9|HEY2	-2.0245	HBV_related
GO Biological Processes	19	GO:0061180	mammary gland epithelium development	-3.29093	10.8517	6.00658	22539	67	124	4	3.22581	1.58668	367|675|2099|3202	AR|BRCA2|ESR1|HOXA5	-2.00294	HBV_related
GO Biological Processes	19	GO:0006110	regulation of glycolytic process	-3.29093	10.8517	6.00658	22539	67	124	4	3.22581	1.58668	863|9611|10891|51085	CBFA2T3|NCOR1|PPARGC1A|MLXIPL	-2.00294	HBV_related
GO Biological Processes	19	GO:0048839	inner ear development	-3.28521	5.99229	5.02954	22539	182	124	6	4.83871	1.92701	4094|4171|6662|7020|9935|23493	MAF|MCM2|SOX9|TFAP2A|MAFB|HEY2	-1.99924	HBV_related
GO Biological Processes	19	GO:0045165	cell fate commitment	-3.28202	5.0093	4.77946	22539	254	124	7	5.64516	2.07257	367|2114|2627|4086|6662|6666|23493	AR|ETS2|GATA6|SMAD1|SOX9|SOX12|HEY2	-1.9966	HBV_related
GO Biological Processes	19	GO:1901988	negative regulation of cell cycle phase transition	-3.27188	4.98966	4.7655	22539	255	124	7	5.64516	2.07257	672|1820|2146|4869|6659|9319|79733	BRCA1|ARID3A|EZH2|NPM1|SOX4|TRIP13|E2F8	-1.98923	HBV_related
GO Biological Processes	19	GO:0071333	cellular response to glucose stimulus	-3.27185	7.57359	5.37012	22539	120	124	5	4.03226	1.76655	6597|6659|9971|10891|51085	SMARCA4|SOX4|NR1H4|PPARGC1A|MLXIPL	-1.98923	HBV_related
GO Biological Processes	19	GO:0051385	response to mineralocorticoid	-3.27172	18.8034	7.13532	22539	29	124	3	2.41935	1.37981	142|2353|2354	PARP1|FOS|FOSB	-1.98923	HBV_related
Canonical Pathways	11	M258	PID BARD1 PATHWAY	-3.27172	18.8034	7.13532	22539	29	124	3	2.41935	1.37981	672|2547|4869	BRCA1|XRCC6|NPM1	-1.98923	HBV_related
GO Biological Processes	19	GO:0032024	positive regulation of insulin secretion	-3.26644	10.6921	5.95335	22539	68	124	4	3.22581	1.58668	6659|8431|9971|23410	SOX4|NR0B2|NR1H4|SIRT3	-1.98436	HBV_related
GO Biological Processes	19	GO:0045936	negative regulation of phosphate metabolic process	-3.26566	3.28853	4.2548	22539	608	124	11	8.87097	2.55331	142|863|2305|4092|4869|5187|9611|10614|10891|23410|51085	PARP1|CBFA2T3|FOXM1|SMAD7|NPM1|PER1|NCOR1|HEXIM1|PPARGC1A|SIRT3|MLXIPL	-1.98401	HBV_related
GO Biological Processes	19	GO:0030278	regulation of ossification	-3.2602	5.92716	4.99134	22539	184	124	6	4.83871	1.92701	4086|4088|6662|7020|10140|23051	SMAD1|SMAD3|SOX9|TFAP2A|TOB1|ZHX3	-1.98076	HBV_related
GO Biological Processes	19	GO:0010563	negative regulation of phosphorus metabolic process	-3.25975	3.28313	4.24834	22539	609	124	11	8.87097	2.55331	142|863|2305|4092|4869|5187|9611|10614|10891|23410|51085	PARP1|CBFA2T3|FOXM1|SMAD7|NPM1|PER1|NCOR1|HEXIM1|PPARGC1A|SIRT3|MLXIPL	-1.98076	HBV_related
GO Biological Processes	19	GO:0040029	regulation of gene expression, epigenetic	-3.25929	3.5432	4.33382	22539	513	124	10	8.06452	2.44523	672|2099|2146|3159|4086|4088|5440|5931|9611|23408	BRCA1|ESR1|EZH2|HMGA1|SMAD1|SMAD3|POLR2K|RBBP7|NCOR1|SIRT5	-1.98076	HBV_related
GO Biological Processes	19	GO:0003231	cardiac ventricle development	-3.25542	7.511	5.34123	22539	121	124	5	4.03226	1.76655	4092|5308|6299|6659|23493	SMAD7|PITX2|SALL1|SOX4|HEY2	-1.97791	HBV_related
GO Biological Processes	19	GO:0006310	DNA recombination	-3.25176	4.95083	4.7378	22539	257	124	7	5.64516	2.07257	142|672|675|2547|3148|9319|51176	PARP1|BRCA1|BRCA2|XRCC6|HMGB2|TRIP13|LEF1	-1.97507	HBV_related
GO Biological Processes	19	GO:1902807	negative regulation of cell cycle G1/S phase transition	-3.23914	7.44943	5.31266	22539	122	124	5	4.03226	1.76655	1820|2146|4869|6659|79733	ARID3A|EZH2|NPM1|SOX4|E2F8	-1.96286	HBV_related
GO Biological Processes	19	GO:0061036	positive regulation of cartilage development	-3.2277	18.1766	7.00195	22539	30	124	3	2.41935	1.37981	4086|4088|6662	SMAD1|SMAD3|SOX9	-1.9547	HBV_related
GO Biological Processes	19	GO:0031128	developmental induction	-3.2277	18.1766	7.00195	22539	30	124	3	2.41935	1.37981	367|6299|6662	AR|SALL1|SOX9	-1.9547	HBV_related
GO Biological Processes	19	GO:2000758	positive regulation of peptidyl-lysine acetylation	-3.2277	18.1766	7.00195	22539	30	124	3	2.41935	1.37981	672|6659|10891	BRCA1|SOX4|PPARGC1A	-1.9547	HBV_related
GO Biological Processes	19	GO:0046939	nucleotide phosphorylation	-3.22301	7.38887	5.28441	22539	123	124	5	4.03226	1.76655	863|4831|9611|10891|51085	CBFA2T3|NME2|NCOR1|PPARGC1A|MLXIPL	-1.95366	HBV_related
GO Biological Processes	19	GO:0071331	cellular response to hexose stimulus	-3.22301	7.38887	5.28441	22539	123	124	5	4.03226	1.76655	6597|6659|9971|10891|51085	SMARCA4|SOX4|NR1H4|PPARGC1A|MLXIPL	-1.95366	HBV_related
GO Biological Processes	19	GO:0048706	embryonic skeletal system development	-3.22301	7.38887	5.28441	22539	123	124	5	4.03226	1.76655	3202|3217|4088|7020|7703	HOXA5|HOXB7|SMAD3|TFAP2A|PCGF2	-1.95366	HBV_related
Reactome Gene Sets	6	R-HSA-400253	Circadian Clock	-3.21862	10.3866	5.85014	22539	70	124	4	3.22581	1.58668	4862|5187|9611|10891	NPAS2|PER1|NCOR1|PPARGC1A	-1.94967	HBV_related
GO Biological Processes	19	GO:0071326	cellular response to monosaccharide stimulus	-3.20703	7.32928	5.25648	22539	124	124	5	4.03226	1.76655	6597|6659|9971|10891|51085	SMARCA4|SOX4|NR1H4|PPARGC1A|MLXIPL	-1.9401	HBV_related
GO Biological Processes	19	GO:0003206	cardiac chamber morphogenesis	-3.20703	7.32928	5.25648	22539	124	124	5	4.03226	1.76655	2627|4092|5308|6659|23493	GATA6|SMAD7|PITX2|SOX4|HEY2	-1.9401	HBV_related
GO Biological Processes	19	GO:0010639	negative regulation of organelle organization	-3.19924	4.23944	4.49655	22539	343	124	8	6.45161	2.20618	142|672|3159|4869|9232|9319|9700|10891	PARP1|BRCA1|HMGA1|NPM1|PTTG1|TRIP13|ESPL1|PPARGC1A	-1.93361	HBV_related
GO Biological Processes	19	GO:0006417	regulation of translation	-3.19554	3.22488	4.17822	22539	620	124	11	8.87097	2.55331	602|2099|4086|4088|4869|5187|5440|6659|9611|10140|22927	BCL3|ESR1|SMAD1|SMAD3|NPM1|PER1|POLR2K|SOX4|NCOR1|TOB1|HABP4	-1.93354	HBV_related
GO Biological Processes	19	GO:0031571	mitotic G1 DNA damage checkpoint	-3.19527	10.2403	5.80008	22539	71	124	4	3.22581	1.58668	1820|4869|6659|79733	ARID3A|NPM1|SOX4|E2F8	-1.93354	HBV_related
GO Biological Processes	19	GO:0044819	mitotic G1/S transition checkpoint	-3.19527	10.2403	5.80008	22539	71	124	4	3.22581	1.58668	1820|4869|6659|79733	ARID3A|NPM1|SOX4|E2F8	-1.93354	HBV_related
GO Biological Processes	19	GO:0030811	regulation of nucleotide catabolic process	-3.19527	10.2403	5.80008	22539	71	124	4	3.22581	1.58668	863|9611|10891|51085	CBFA2T3|NCOR1|PPARGC1A|MLXIPL	-1.93354	HBV_related
GO Biological Processes	19	GO:0001704	formation of primary germ layer	-3.1912	7.27065	5.22886	22539	125	124	5	4.03226	1.76655	2114|2627|4086|4088|51176	ETS2|GATA6|SMAD1|SMAD3|LEF1	-1.92986	HBV_related
GO Biological Processes	19	GO:0035886	vascular smooth muscle cell differentiation	-3.18524	17.5903	6.87488	22539	31	124	3	2.41935	1.37981	2627|5308|23493	GATA6|PITX2|HEY2	-1.92541	HBV_related
GO Biological Processes	19	GO:0003209	cardiac atrium morphogenesis	-3.18524	17.5903	6.87488	22539	31	124	3	2.41935	1.37981	5308|6659|23493	PITX2|SOX4|HEY2	-1.92541	HBV_related
KEGG Pathway	24	hsa04710	Circadian rhythm	-3.18524	17.5903	6.87488	22539	31	124	3	2.41935	1.37981	4862|5187|8863	NPAS2|PER1|PER3	-1.92541	HBV_related
GO Biological Processes	19	GO:0046887	positive regulation of hormone secretion	-3.1755	7.21294	5.20154	22539	126	124	5	4.03226	1.76655	4824|6659|8431|9971|23410	NKX3-1|SOX4|NR0B2|NR1H4|SIRT3	-1.91732	HBV_related
GO Biological Processes	19	GO:0044783	G1 DNA damage checkpoint	-3.17228	10.0981	5.75101	22539	72	124	4	3.22581	1.58668	1820|4869|6659|79733	ARID3A|NPM1|SOX4|E2F8	-1.9149	HBV_related
GO Biological Processes	19	GO:0032652	regulation of interleukin-1 production	-3.17228	10.0981	5.75101	22539	72	124	4	3.22581	1.58668	1958|4088|9971|10626	EGR1|SMAD3|NR1H4|TRIM16	-1.9149	HBV_related
GO Biological Processes	19	GO:0001933	negative regulation of protein phosphorylation	-3.17023	3.76934	4.33287	22539	434	124	9	7.25806	2.3299	2305|4092|4869|5187|9611|10614|10891|23410|51085	FOXM1|SMAD7|NPM1|PER1|NCOR1|HEXIM1|PPARGC1A|SIRT3|MLXIPL	-1.91363	HBV_related
GO Biological Processes	19	GO:0051129	negative regulation of cellular component organization	-3.16686	3.19908	4.14687	22539	625	124	11	8.87097	2.55331	142|367|672|3159|4869|9232|9319|9700|10891|23493|53335	PARP1|AR|BRCA1|HMGA1|NPM1|PTTG1|TRIP13|ESPL1|PPARGC1A|HEY2|BCL11A	-1.9111	HBV_related
GO Biological Processes	19	GO:0035710	CD4-positive, alpha-beta T cell activation	-3.14965	9.95979	5.7029	22539	73	124	4	3.22581	1.58668	602|4092|6304|51176	BCL3|SMAD7|SATB1|LEF1	-1.89656	HBV_related
GO Biological Processes	19	GO:0072078	nephron tubule morphogenesis	-3.14965	9.95979	5.7029	22539	73	124	4	3.22581	1.58668	3217|6299|6662|6943	HOXB7|SALL1|SOX9|TCF21	-1.89656	HBV_related
Reactome Gene Sets	6	R-HSA-170834	Signaling by TGF-beta Receptor Complex	-3.14965	9.95979	5.7029	22539	73	124	4	3.22581	1.58668	142|4088|4092|9611	PARP1|SMAD3|SMAD7|NCOR1	-1.89656	HBV_related
GO Biological Processes	19	GO:0016571	histone methylation	-3.14454	7.10024	5.14779	22539	128	124	5	4.03226	1.76655	672|2146|6304|9971|79723	BRCA1|EZH2|SATB1|NR1H4|SUV39H2	-1.89231	HBV_related
Reactome Gene Sets	6	R-HSA-69190	DNA strand elongation	-3.14423	17.0406	6.7536	22539	32	124	3	2.41935	1.37981	4171|4173|4175	MCM2|MCM4|MCM6	-1.89231	HBV_related
Reactome Gene Sets	6	R-HSA-68962	Activation of the pre-replicative complex	-3.14423	17.0406	6.7536	22539	32	124	3	2.41935	1.37981	4171|4173|4175	MCM2|MCM4|MCM6	-1.89231	HBV_related
Reactome Gene Sets	6	R-HSA-2559583	Cellular Senescence	-3.1281	5.5928	4.79086	22539	195	124	6	4.83871	1.92701	2114|2146|2353|3159|5931|23466	ETS2|EZH2|FOS|HMGA1|RBBP7|CBX6	-1.8789	HBV_related
GO Biological Processes	19	GO:0072088	nephron epithelium morphogenesis	-3.10538	9.69419	5.60939	22539	75	124	4	3.22581	1.58668	3217|6299|6662|6943	HOXB7|SALL1|SOX9|TCF21	-1.86078	HBV_related
GO Biological Processes	19	GO:0043470	regulation of carbohydrate catabolic process	-3.10538	9.69419	5.60939	22539	75	124	4	3.22581	1.58668	863|9611|10891|51085	CBFA2T3|NCOR1|PPARGC1A|MLXIPL	-1.86078	HBV_related
GO Biological Processes	19	GO:1905332	positive regulation of morphogenesis of an epithelium	-3.10458	16.5242	6.63768	22539	33	124	3	2.41935	1.37981	367|3217|6662	AR|HOXB7|SOX9	-1.86074	HBV_related
GO Biological Processes	19	GO:0006471	protein ADP-ribosylation	-3.10458	16.5242	6.63768	22539	33	124	3	2.41935	1.37981	142|23408|23410	PARP1|SIRT5|SIRT3	-1.86074	HBV_related
GO Biological Processes	19	GO:0071322	cellular response to carbohydrate stimulus	-3.09912	6.93764	5.06929	22539	131	124	5	4.03226	1.76655	6597|6659|9971|10891|51085	SMARCA4|SOX4|NR1H4|PPARGC1A|MLXIPL	-1.85681	HBV_related
GO Biological Processes	19	GO:0007498	mesoderm development	-3.09912	6.93764	5.06929	22539	131	124	5	4.03226	1.76655	2114|4086|4088|9355|51176	ETS2|SMAD1|SMAD3|LHX2|LEF1	-1.85681	HBV_related
GO Biological Processes	19	GO:0001889	liver development	-3.08424	6.88508	5.04367	22539	132	124	5	4.03226	1.76655	2146|2627|4088|6662|79733	EZH2|GATA6|SMAD3|SOX9|E2F8	-1.8442	HBV_related
GO Biological Processes	19	GO:0048514	blood vessel morphogenesis	-3.08267	3.12411	4.05465	22539	640	124	11	8.87097	2.55331	672|2627|3202|4086|4092|5308|6659|6943|23493|51176|79733	BRCA1|GATA6|HOXA5|SMAD1|SMAD7|PITX2|SOX4|TCF21|HEY2|LEF1|E2F8	-1.84339	HBV_related
GO Biological Processes	19	GO:0090068	positive regulation of cell cycle process	-3.07881	4.62677	4.50075	22539	275	124	7	5.64516	2.07257	672|1820|2627|4869|6659|9700|79733	BRCA1|ARID3A|GATA6|NPM1|SOX4|ESPL1|E2F8	-1.83991	HBV_related
Reactome Gene Sets	6	R-HSA-1640170	Cell Cycle	-3.07165	3.11437	4.04256	22539	642	124	11	8.87097	2.55331	672|675|2305|4171|4173|4175|4869|5931|9232|9700|51230	BRCA1|BRCA2|FOXM1|MCM2|MCM4|MCM6|NPM1|RBBP7|PTTG1|ESPL1|PHF20	-1.83425	HBV_related
GO Biological Processes	19	GO:0032731	positive regulation of interleukin-1 beta production	-3.0662	16.0382	6.52671	22539	34	124	3	2.41935	1.37981	1958|4088|10626	EGR1|SMAD3|TRIM16	-1.82955	HBV_related
GO Biological Processes	19	GO:0072028	nephron morphogenesis	-3.0624	9.4424	5.51933	22539	77	124	4	3.22581	1.58668	3217|6299|6662|6943	HOXB7|SALL1|SOX9|TCF21	-1.8265	HBV_related
GO Biological Processes	19	GO:0061333	renal tubule morphogenesis	-3.0624	9.4424	5.51933	22539	77	124	4	3.22581	1.58668	3217|6299|6662|6943	HOXB7|SALL1|SOX9|TCF21	-1.8265	HBV_related
GO Biological Processes	19	GO:1901216	positive regulation of neuron death	-3.04137	9.32134	5.47552	22539	78	124	4	3.22581	1.58668	142|1958|2353|7020	PARP1|EGR1|FOS|TFAP2A	-1.80994	HBV_related
GO Biological Processes	19	GO:0061008	hepaticobiliary system development	-3.04036	6.73208	4.96839	22539	135	124	5	4.03226	1.76655	2146|2627|4088|6662|79733	EZH2|GATA6|SMAD3|SOX9|E2F8	-1.80983	HBV_related
GO Biological Processes	19	GO:0009411	response to UV	-3.04036	6.73208	4.96839	22539	135	124	5	4.03226	1.76655	142|602|675|4869|22954	PARP1|BCL3|BRCA2|NPM1|TRIM32	-1.80983	HBV_related
GO Biological Processes	19	GO:0030178	negative regulation of Wnt signaling pathway	-3.03743	5.3724	4.6544	22539	203	124	6	4.83871	1.92701	1958|3090|6662|7089|10042|51176	EGR1|HIC1|SOX9|TLE2|HMGXB4|LEF1	-1.80822	HBV_related
GO Biological Processes	19	GO:0019216	regulation of lipid metabolic process	-3.03214	3.99486	4.28444	22539	364	124	8	6.45161	2.20618	672|1958|4862|9611|9971|10891|23541|51085	BRCA1|EGR1|NPAS2|NCOR1|NR1H4|PPARGC1A|SEC14L2|MLXIPL	-1.8033	HBV_related
GO Biological Processes	19	GO:0048566	embryonic digestive tract development	-3.02902	15.58	6.42036	22539	35	124	3	2.41935	1.37981	5308|6299|6943	PITX2|SALL1|TCF21	-1.80238	HBV_related
GO Biological Processes	19	GO:0003230	cardiac atrium development	-3.02902	15.58	6.42036	22539	35	124	3	2.41935	1.37981	5308|6659|23493	PITX2|SOX4|HEY2	-1.80238	HBV_related
GO Biological Processes	19	GO:0048536	spleen development	-3.02902	15.58	6.42036	22539	35	124	3	2.41935	1.37981	602|5308|6943	BCL3|PITX2|TCF21	-1.80238	HBV_related
GO Biological Processes	19	GO:0060795	cell fate commitment involved in formation of primary germ layer	-3.02902	15.58	6.42036	22539	35	124	3	2.41935	1.37981	2114|2627|4086	ETS2|GATA6|SMAD1	-1.80238	HBV_related
GO Biological Processes	19	GO:0001678	cellular glucose homeostasis	-3.02599	6.68258	4.9438	22539	136	124	5	4.03226	1.76655	6597|6659|9971|10891|51085	SMARCA4|SOX4|NR1H4|PPARGC1A|MLXIPL	-1.80008	HBV_related
Canonical Pathways	11	M66	PID MYC ACTIV PATHWAY	-3.02064	9.20335	5.43249	22539	79	124	4	3.22581	1.58668	3159|4088|4831|4869	HMGA1|SMAD3|NME2|NPM1	-1.79583	HBV_related
GO Biological Processes	19	GO:0042110	T cell activation	-3.00559	3.57182	4.13584	22539	458	124	9	7.25806	2.3299	602|1958|2000|4088|4092|6304|6659|9935|51176	BCL3|EGR1|ELF4|SMAD3|SMAD7|SATB1|SOX4|MAFB|LEF1	-1.78333	HBV_related
GO Biological Processes	19	GO:0072006	nephron development	-2.9976	6.58573	4.89536	22539	138	124	5	4.03226	1.76655	1958|3217|6299|6662|6943	EGR1|HOXB7|SALL1|SOX9|TCF21	-1.77678	HBV_related
GO Biological Processes	19	GO:0003179	heart valve morphogenesis	-2.99297	15.1472	6.3183	22539	36	124	3	2.41935	1.37981	6659|6662|23493	SOX4|SOX9|HEY2	-1.77396	HBV_related
KEGG Pathway	24	hsa03030	DNA replication	-2.99297	15.1472	6.3183	22539	36	124	3	2.41935	1.37981	4171|4173|4175	MCM2|MCM4|MCM6	-1.77396	HBV_related
GO Biological Processes	19	GO:0060428	lung epithelium development	-2.99297	15.1472	6.3183	22539	36	124	3	2.41935	1.37981	2627|3202|6662	GATA6|HOXA5|SOX9	-1.77396	HBV_related
GO Biological Processes	19	GO:0001503	ossification	-2.98662	3.93008	4.22675	22539	370	124	8	6.45161	2.20618	4086|4088|4665|6662|7020|10140|23051|51176	SMAD1|SMAD3|NAB2|SOX9|TFAP2A|TOB1|ZHX3|LEF1	-1.76833	HBV_related
Reactome Gene Sets	6	R-HSA-6807070	PTEN Regulation	-2.96967	6.49165	4.84788	22539	140	124	5	4.03226	1.76655	1958|2146|5931|23466|54815	EGR1|EZH2|RBBP7|CBX6|GATAD2A	-1.75282	HBV_related
GO Biological Processes	19	GO:0050810	regulation of steroid biosynthetic process	-2.96015	8.86664	5.30786	22539	82	124	4	3.22581	1.58668	1958|9971|10891|23541	EGR1|NR1H4|PPARGC1A|SEC14L2	-1.74544	HBV_related
Canonical Pathways	11	M115	PID REG GR PATHWAY	-2.96015	8.86664	5.30786	22539	82	124	4	3.22581	1.58668	1958|2353|6597|9970	EGR1|FOS|SMARCA4|NR1I3	-1.74544	HBV_related
GO Biological Processes	19	GO:0032612	interleukin-1 production	-2.96015	8.86664	5.30786	22539	82	124	4	3.22581	1.58668	1958|4088|9971|10626	EGR1|SMAD3|NR1H4|TRIM16	-1.74544	HBV_related
GO Biological Processes	19	GO:0080135	regulation of cellular response to stress	-2.95871	3.01573	3.91836	22539	663	124	11	8.87097	2.55331	142|672|2305|3090|3159|4824|4862|4869|5187|9611|22954	PARP1|BRCA1|FOXM1|HIC1|HMGA1|NKX3-1|NPAS2|NPM1|PER1|NCOR1|TRIM32	-1.74506	HBV_related
Reactome Gene Sets	6	R-HSA-176187	Activation of ATR in response to replication stress	-2.95799	14.7378	6.22023	22539	37	124	3	2.41935	1.37981	4171|4173|4175	MCM2|MCM4|MCM6	-1.74506	HBV_related
GO Biological Processes	19	GO:0048286	lung alveolus development	-2.95799	14.7378	6.22023	22539	37	124	3	2.41935	1.37981	2627|3202|6943	GATA6|HOXA5|TCF21	-1.74506	HBV_related
GO Biological Processes	19	GO:2000142	regulation of DNA-templated transcription, initiation	-2.95799	14.7378	6.22023	22539	37	124	3	2.41935	1.37981	2099|10923|23493	ESR1|SUB1|HEY2	-1.74506	HBV_related
GO Biological Processes	19	GO:0034504	protein localization to nucleus	-2.95679	3.88805	4.18895	22539	374	124	8	6.45161	2.20618	142|473|602|4088|4601|6659|6662|10140	PARP1|RERE|BCL3|SMAD3|MXI1|SOX4|SOX9|TOB1	-1.74422	HBV_related
GO Biological Processes	19	GO:0097193	intrinsic apoptotic signaling pathway	-2.94492	4.38746	4.31834	22539	290	124	7	5.64516	2.07257	142|602|672|675|3090|4824|22954	PARP1|BCL3|BRCA1|BRCA2|HIC1|NKX3-1|TRIM32	-1.73482	HBV_related
GO Biological Processes	19	GO:0006754	ATP biosynthetic process	-2.9422	6.40022	4.80131	22539	142	124	5	4.03226	1.76655	142|863|9611|10891|51085	PARP1|CBFA2T3|NCOR1|PPARGC1A|MLXIPL	-1.73246	HBV_related
GO Biological Processes	19	GO:0016579	protein deubiquitination	-2.9363	4.37238	4.30662	22539	291	124	7	5.64516	2.07257	367|672|2099|3607|4086|4088|4092	AR|BRCA1|ESR1|FOXK2|SMAD1|SMAD3|SMAD7	-1.72761	HBV_related
GO Biological Processes	19	GO:0009132	nucleoside diphosphate metabolic process	-2.92864	6.35546	4.77836	22539	143	124	5	4.03226	1.76655	863|4831|9611|10891|51085	CBFA2T3|NME2|NCOR1|PPARGC1A|MLXIPL	-1.72106	HBV_related
GO Biological Processes	19	GO:0010942	positive regulation of cell death	-2.92734	2.98868	3.88376	22539	669	124	11	8.87097	2.55331	142|1958|2353|3202|4088|4824|6659|7020|8462|10891|10921	PARP1|EGR1|FOS|HOXA5|SMAD3|NKX3-1|SOX4|TFAP2A|KLF11|PPARGC1A|RNPS1	-1.72041	HBV_related
GO Biological Processes	19	GO:1901985	positive regulation of protein acetylation	-2.92401	14.35	6.1259	22539	38	124	3	2.41935	1.37981	672|6659|10891	BRCA1|SOX4|PPARGC1A	-1.71777	HBV_related
KEGG Pathway	24	hsa04350	TGF-beta signaling pathway	-2.92117	8.65553	5.22826	22539	84	124	4	3.22581	1.58668	4086|4088|4092|5308	SMAD1|SMAD3|SMAD7|PITX2	-1.71564	HBV_related
GO Biological Processes	19	GO:0006302	double-strand break repair	-2.91945	5.09625	4.47813	22539	214	124	6	4.83871	1.92701	142|672|675|2305|2547|9319	PARP1|BRCA1|BRCA2|FOXM1|XRCC6|TRIP13	-1.71496	HBV_related
GO Biological Processes	19	GO:0051054	positive regulation of DNA metabolic process	-2.91945	5.09625	4.47813	22539	214	124	6	4.83871	1.92701	142|672|2305|4862|10891|79733	PARP1|BRCA1|FOXM1|NPAS2|PPARGC1A|E2F8	-1.71496	HBV_related
GO Biological Processes	19	GO:0043433	negative regulation of DNA binding transcription factor activity	-2.91518	6.31132	4.75563	22539	144	124	5	4.03226	1.76655	2099|2146|4092|8431|9971	ESR1|EZH2|SMAD7|NR0B2|NR1H4	-1.71381	HBV_related
GO Biological Processes	19	GO:2001233	regulation of apoptotic signaling pathway	-2.90556	3.81661	4.12404	22539	381	124	8	6.45161	2.20618	142|367|672|3148|4088|4824|7703|22954	PARP1|AR|BRCA1|HMGB2|SMAD3|NKX3-1|PCGF2|TRIM32	-1.70592	HBV_related
GO Biological Processes	19	GO:0043010	camera-type eye development	-2.90218	4.31309	4.26027	22539	295	124	7	5.64516	2.07257	4088|4094|5308|6597|6662|7020|9355	SMAD3|MAF|PITX2|SMARCA4|SOX9|TFAP2A|LHX2	-1.70403	HBV_related
GO Biological Processes	19	GO:0045778	positive regulation of ossification	-2.90207	8.5537	5.18945	22539	85	124	4	3.22581	1.58668	4086|4088|7020|23051	SMAD1|SMAD3|TFAP2A|ZHX3	-1.70403	HBV_related
GO Biological Processes	19	GO:0007568	aging	-2.89374	4.29852	4.24882	22539	296	124	7	5.64516	2.07257	675|2305|2353|3159|4869|10891|23410	BRCA2|FOXM1|FOS|HMGA1|NPM1|PPARGC1A|SIRT3	-1.69718	HBV_related
GO Biological Processes	19	GO:1901861	regulation of muscle tissue development	-2.88858	6.22487	4.7108	22539	146	124	5	4.03226	1.76655	2627|4088|10891|23493|51176	GATA6|SMAD3|PPARGC1A|HEY2|LEF1	-1.69306	HBV_related
Reactome Gene Sets	6	R-HSA-5688426	Deubiquitination	-2.88533	4.28405	4.23741	22539	297	124	7	5.64516	2.07257	367|672|2099|3607|4086|4088|4092	AR|BRCA1|ESR1|FOXK2|SMAD1|SMAD3|SMAD7	-1.69058	HBV_related
GO Biological Processes	19	GO:0016575	histone deacetylation	-2.88322	8.45424	5.15127	22539	86	124	4	3.22581	1.58668	5187|5931|6299|23410	PER1|RBBP7|SALL1|SIRT3	-1.68931	HBV_related
Reactome Gene Sets	6	R-HSA-212165	Epigenetic regulation of gene expression	-2.87544	6.18252	4.6887	22539	147	124	5	4.03226	1.76655	2146|5440|5931|11335|54815	EZH2|POLR2K|RBBP7|CBX3|GATAD2A	-1.68264	HBV_related
GO Biological Processes	19	GO:0032844	regulation of homeostatic process	-2.87052	3.41523	3.97395	22539	479	124	9	7.25806	2.3299	142|3148|3202|4092|6597|9935|9971|10891|51085	PARP1|HMGB2|HOXA5|SMAD7|SMARCA4|MAFB|NR1H4|PPARGC1A|MLXIPL	-1.67873	HBV_related
GO Biological Processes	19	GO:0000075	cell cycle checkpoint	-2.86819	4.97989	4.40196	22539	219	124	6	4.83871	1.92701	672|1820|4869|6659|9319|79733	BRCA1|ARID3A|NPM1|SOX4|TRIP13|E2F8	-1.67708	HBV_related
GO Biological Processes	19	GO:0010717	regulation of epithelial to mesenchymal transition	-2.86461	8.35706	5.11371	22539	87	124	4	3.22581	1.58668	2146|4088|4092|51176	EZH2|SMAD3|SMAD7|LEF1	-1.67392	HBV_related
GO Biological Processes	19	GO:1900371	regulation of purine nucleotide biosynthetic process	-2.86241	6.14075	4.6668	22539	148	124	5	4.03226	1.76655	142|863|9611|10891|51085	PARP1|CBFA2T3|NCOR1|PPARGC1A|MLXIPL	-1.67296	HBV_related
GO Biological Processes	19	GO:0016331	morphogenesis of embryonic epithelium	-2.86241	6.14075	4.6668	22539	148	124	5	4.03226	1.76655	367|6659|6662|7020|9355	AR|SOX4|SOX9|TFAP2A|LHX2	-1.67296	HBV_related
GO Biological Processes	19	GO:0090184	positive regulation of kidney development	-2.85886	13.6325	5.94751	22539	40	124	3	2.41935	1.37981	1958|3217|6662	EGR1|HOXB7|SOX9	-1.67078	HBV_related
GO Biological Processes	19	GO:0042181	ketone biosynthetic process	-2.85886	13.6325	5.94751	22539	40	124	3	2.41935	1.37981	1958|10891|23408	EGR1|PPARGC1A|SIRT5	-1.67078	HBV_related
GO Biological Processes	19	GO:0033046	negative regulation of sister chromatid segregation	-2.85886	13.6325	5.94751	22539	40	124	3	2.41935	1.37981	9232|9319|9700	PTTG1|TRIP13|ESPL1	-1.67078	HBV_related
GO Biological Processes	19	GO:0030808	regulation of nucleotide biosynthetic process	-2.84947	6.09953	4.64511	22539	149	124	5	4.03226	1.76655	142|863|9611|10891|51085	PARP1|CBFA2T3|NCOR1|PPARGC1A|MLXIPL	-1.66239	HBV_related
GO Biological Processes	19	GO:0051196	regulation of coenzyme metabolic process	-2.84623	8.2621	5.07674	22539	88	124	4	3.22581	1.58668	863|9611|10891|51085	CBFA2T3|NCOR1|PPARGC1A|MLXIPL	-1.66015	HBV_related
GO Biological Processes	19	GO:0045639	positive regulation of myeloid cell differentiation	-2.84623	8.2621	5.07674	22539	88	124	4	3.22581	1.58668	2353|3148|3202|51176	FOS|HMGB2|HOXA5|LEF1	-1.66015	HBV_related
GO Biological Processes	19	GO:0051052	regulation of DNA metabolic process	-2.84143	3.72854	4.04282	22539	390	124	8	6.45161	2.20618	142|672|675|2305|4862|4869|10891|79733	PARP1|BRCA1|BRCA2|FOXM1|NPAS2|NPM1|PPARGC1A|E2F8	-1.65702	HBV_related
GO Biological Processes	19	GO:0010212	response to ionizing radiation	-2.83664	6.05887	4.62361	22539	150	124	5	4.03226	1.76655	142|672|675|1958|2547	PARP1|BRCA1|BRCA2|EGR1|XRCC6	-1.65322	HBV_related
GO Biological Processes	19	GO:0009416	response to light stimulus	-2.83562	4.19922	4.17	22539	303	124	7	5.64516	2.07257	142|602|675|2353|4869|5187|22954	PARP1|BCL3|BRCA2|FOS|NPM1|PER1|TRIM32	-1.65254	HBV_related
GO Biological Processes	19	GO:0051985	negative regulation of chromosome segregation	-2.8276	13.3	5.86304	22539	41	124	3	2.41935	1.37981	9232|9319|9700	PTTG1|TRIP13|ESPL1	-1.64518	HBV_related
GO Biological Processes	19	GO:0050434	positive regulation of viral transcription	-2.8276	13.3	5.86304	22539	41	124	3	2.41935	1.37981	5440|6597|51176	POLR2K|SMARCA4|LEF1	-1.64518	HBV_related
GO Biological Processes	19	GO:0050680	negative regulation of epithelial cell proliferation	-2.8239	6.01875	4.6023	22539	151	124	5	4.03226	1.76655	367|675|687|4824|6662	AR|BRCA2|KLF9|NKX3-1|SOX9	-1.6428	HBV_related
GO Biological Processes	19	GO:0030099	myeloid cell differentiation	-2.82048	3.70007	4.01627	22539	393	124	8	6.45161	2.20618	142|863|2353|3148|3202|3217|9935|51176	PARP1|CBFA2T3|FOS|HMGB2|HOXA5|HOXB7|MAFB|LEF1	-1.63971	HBV_related
GO Biological Processes	19	GO:0070646	protein modification by small protein removal	-2.81123	4.15805	4.13694	22539	306	124	7	5.64516	2.07257	367|672|2099|3607|4086|4088|4092	AR|BRCA1|ESR1|FOXK2|SMAD1|SMAD3|SMAD7	-1.63145	HBV_related
GO Biological Processes	19	GO:0033044	regulation of chromosome organization	-2.81123	4.15805	4.13694	22539	306	124	7	5.64516	2.07257	142|672|3159|9232|9319|9700|10891	PARP1|BRCA1|HMGA1|PTTG1|TRIP13|ESPL1|PPARGC1A	-1.63145	HBV_related
GO Biological Processes	19	GO:0060840	artery development	-2.81018	8.07849	5.00452	22539	90	124	4	3.22581	1.58668	4092|4824|6659|23493	SMAD7|NKX3-1|SOX4|HEY2	-1.63106	HBV_related
GO Biological Processes	19	GO:0060021	roof of mouth development	-2.81018	8.07849	5.00452	22539	90	124	4	3.22581	1.58668	6943|7020|9242|51176	TCF21|TFAP2A|MSC|LEF1	-1.63106	HBV_related
GO Biological Processes	19	GO:0071248	cellular response to metal ion	-2.79872	5.94007	4.56026	22539	153	124	5	4.03226	1.76655	142|2353|2354|7020|10891	PARP1|FOS|FOSB|TFAP2A|PPARGC1A	-1.62254	HBV_related
GO Biological Processes	19	GO:0032732	positive regulation of interleukin-1 production	-2.79715	12.9833	5.78146	22539	42	124	3	2.41935	1.37981	1958|4088|10626	EGR1|SMAD3|TRIM16	-1.62164	HBV_related
GO Biological Processes	19	GO:0006270	DNA replication initiation	-2.79715	12.9833	5.78146	22539	42	124	3	2.41935	1.37981	4171|4173|4175	MCM2|MCM4|MCM6	-1.62164	HBV_related
GO Biological Processes	19	GO:0007420	brain development	-2.79584	2.87687	3.73818	22539	695	124	11	8.87097	2.55331	473|675|2146|2547|4086|5308|6299|9355|9935|10891|51176	RERE|BRCA2|EZH2|XRCC6|SMAD1|PITX2|SALL1|LHX2|MAFB|PPARGC1A|LEF1	-1.62097	HBV_related
GO Biological Processes	19	GO:0046632	alpha-beta T cell differentiation	-2.79249	7.98972	4.96925	22539	91	124	4	3.22581	1.58668	602|4092|6304|51176	BCL3|SMAD7|SATB1|LEF1	-1.61859	HBV_related
KEGG Pathway	24	hsa04390	Hippo signaling pathway	-2.78627	5.9015	4.53952	22539	154	124	5	4.03226	1.76655	4086|4088|4092|7004|51176	SMAD1|SMAD3|SMAD7|TEAD4|LEF1	-1.61432	HBV_related
GO Biological Processes	19	GO:0000077	DNA damage checkpoint	-2.78627	5.9015	4.53952	22539	154	124	5	4.03226	1.76655	672|1820|4869|6659|79733	BRCA1|ARID3A|NPM1|SOX4|E2F8	-1.61432	HBV_related
GO Biological Processes	19	GO:0072080	nephron tubule development	-2.77501	7.90288	4.93451	22539	92	124	4	3.22581	1.58668	3217|6299|6662|6943	HOXB7|SALL1|SOX9|TCF21	-1.60531	HBV_related
GO Biological Processes	19	GO:0090277	positive regulation of peptide hormone secretion	-2.77501	7.90288	4.93451	22539	92	124	4	3.22581	1.58668	6659|8431|9971|23410	SOX4|NR0B2|NR1H4|SIRT3	-1.60531	HBV_related
GO Biological Processes	19	GO:0019827	stem cell population maintenance	-2.77392	5.86342	4.51896	22539	155	124	5	4.03226	1.76655	5440|6299|6659|6662|9079	POLR2K|SALL1|SOX4|SOX9|LDB2	-1.60486	HBV_related
GO Biological Processes	19	GO:0051100	negative regulation of binding	-2.77392	5.86342	4.51896	22539	155	124	5	4.03226	1.76655	4824|9355|22927|23493|51176	NKX3-1|LHX2|HABP4|HEY2|LEF1	-1.60486	HBV_related
GO Biological Processes	19	GO:0008202	steroid metabolic process	-2.77122	4.0912	4.08278	22539	311	124	7	5.64516	2.07257	1958|2099|8431|8856|9971|10891|23541	EGR1|ESR1|NR0B2|NR1I2|NR1H4|PPARGC1A|SEC14L2	-1.60427	HBV_related
GO Biological Processes	19	GO:0042180	cellular ketone metabolic process	-2.76023	4.74173	4.24224	22539	230	124	6	4.83871	1.92701	672|1958|9971|10891|23408|51085	BRCA1|EGR1|NR1H4|PPARGC1A|SIRT5|MLXIPL	-1.59564	HBV_related
GO Biological Processes	19	GO:0050821	protein stabilization	-2.74949	5.78873	4.47837	22539	157	124	5	4.03226	1.76655	4088|4092|6659|8863|10891	SMAD3|SMAD7|SOX4|PER3|PPARGC1A	-1.58744	HBV_related
GO Biological Processes	19	GO:0061326	renal tubule development	-2.74069	7.73473	4.86657	22539	94	124	4	3.22581	1.58668	3217|6299|6662|6943	HOXB7|SALL1|SOX9|TCF21	-1.5799	HBV_related
GO Biological Processes	19	GO:0035282	segmentation	-2.74069	7.73473	4.86657	22539	94	124	4	3.22581	1.58668	4088|4824|9935|51176	SMAD3|NKX3-1|MAFB|LEF1	-1.5799	HBV_related
GO Biological Processes	19	GO:1904837	beta-catenin-TCF complex assembly	-2.73855	12.3931	5.62634	22539	44	124	3	2.41935	1.37981	6597|7089|51176	SMARCA4|TLE2|LEF1	-1.5787	HBV_related
GO Biological Processes	19	GO:0031018	endocrine pancreas development	-2.73855	12.3931	5.62634	22539	44	124	3	2.41935	1.37981	2627|6659|6662	GATA6|SOX4|SOX9	-1.5787	HBV_related
GO Biological Processes	19	GO:0031960	response to corticosteroid	-2.73741	5.75209	4.45834	22539	158	124	5	4.03226	1.76655	142|687|2353|2354|11335	PARP1|KLF9|FOS|FOSB|CBX3	-1.5785	HBV_related
GO Biological Processes	19	GO:0030308	negative regulation of cell growth	-2.72542	5.71592	4.43847	22539	159	124	5	4.03226	1.76655	3621|4088|5931|6597|53335	ING1|SMAD3|RBBP7|SMARCA4|BCL11A	-1.56745	HBV_related
GO Biological Processes	19	GO:0043502	regulation of muscle adaptation	-2.72384	7.65331	4.83335	22539	95	124	4	3.22581	1.58668	142|4088|9569|10891	PARP1|SMAD3|GTF2IRD1|PPARGC1A	-1.5665	HBV_related
GO Biological Processes	19	GO:0006282	regulation of DNA repair	-2.70719	7.57359	4.80061	22539	96	124	4	3.22581	1.58668	142|672|2305|4862	PARP1|BRCA1|FOXM1|NPAS2	-1.55512	HBV_related
GO Biological Processes	19	GO:0045646	regulation of erythrocyte differentiation	-2.68276	11.8543	5.48096	22539	46	124	3	2.41935	1.37981	3148|3202|9935	HMGB2|HOXA5|MAFB	-1.53481	HBV_related
GO Biological Processes	19	GO:0090102	cochlea development	-2.68276	11.8543	5.48096	22539	46	124	3	2.41935	1.37981	4171|6662|23493	MCM2|SOX9|HEY2	-1.53481	HBV_related
GO Biological Processes	19	GO:0031570	DNA integrity checkpoint	-2.67833	5.57565	4.36068	22539	163	124	5	4.03226	1.76655	672|1820|4869|6659|79733	BRCA1|ARID3A|NPM1|SOX4|E2F8	-1.53087	HBV_related
GO Biological Processes	19	GO:0009168	purine ribonucleoside monophosphate biosynthetic process	-2.66677	5.54165	4.34163	22539	164	124	5	4.03226	1.76655	142|863|9611|10891|51085	PARP1|CBFA2T3|NCOR1|PPARGC1A|MLXIPL	-1.52357	HBV_related
GO Biological Processes	19	GO:0048469	cell maturation	-2.66677	5.54165	4.34163	22539	164	124	5	4.03226	1.76655	675|3202|9319|23294|53335	BRCA2|HOXA5|TRIP13|ANKS1A|BCL11A	-1.52357	HBV_related
GO Biological Processes	19	GO:0009127	purine nucleoside monophosphate biosynthetic process	-2.66677	5.54165	4.34163	22539	164	124	5	4.03226	1.76655	142|863|9611|10891|51085	PARP1|CBFA2T3|NCOR1|PPARGC1A|MLXIPL	-1.52357	HBV_related
GO Biological Processes	19	GO:1901990	regulation of mitotic cell cycle phase transition	-2.65998	3.48712	3.81287	22539	417	124	8	6.45161	2.20618	672|1820|2146|4869|6659|9319|9700|79733	BRCA1|ARID3A|EZH2|NPM1|SOX4|TRIP13|ESPL1|E2F8	-1.51866	HBV_related
GO Biological Processes	19	GO:0006096	glycolytic process	-2.65837	7.34409	4.70516	22539	99	124	4	3.22581	1.58668	863|9611|10891|51085	CBFA2T3|NCOR1|PPARGC1A|MLXIPL	-1.51866	HBV_related
Reactome Gene Sets	6	R-HSA-2122947	NOTCH1 Intracellular Domain Regulates Transcription	-2.65585	11.6021	5.4116	22539	47	124	3	2.41935	1.37981	7089|9611|23493	TLE2|NCOR1|HEY2	-1.51866	HBV_related
GO Biological Processes	19	GO:1900372	negative regulation of purine nucleotide biosynthetic process	-2.65585	11.6021	5.4116	22539	47	124	3	2.41935	1.37981	142|863|10891	PARP1|CBFA2T3|PPARGC1A	-1.51866	HBV_related
GO Biological Processes	19	GO:0070303	negative regulation of stress-activated protein kinase signaling cascade	-2.65585	11.6021	5.4116	22539	47	124	3	2.41935	1.37981	2305|5187|9611	FOXM1|PER1|NCOR1	-1.51866	HBV_related
Reactome Gene Sets	6	R-HSA-73762	RNA Polymerase I Transcription Initiation	-2.65585	11.6021	5.4116	22539	47	124	3	2.41935	1.37981	5440|5931|54815	POLR2K|RBBP7|GATAD2A	-1.51866	HBV_related
GO Biological Processes	19	GO:0032330	regulation of chondrocyte differentiation	-2.65585	11.6021	5.4116	22539	47	124	3	2.41935	1.37981	4088|4094|6662	SMAD3|MAF|SOX9	-1.51866	HBV_related
GO Biological Processes	19	GO:0030809	negative regulation of nucleotide biosynthetic process	-2.65585	11.6021	5.4116	22539	47	124	3	2.41935	1.37981	142|863|10891	PARP1|CBFA2T3|PPARGC1A	-1.51866	HBV_related
Canonical Pathways	11	M60	PID NFAT TFPATHWAY	-2.65585	11.6021	5.4116	22539	47	124	3	2.41935	1.37981	1958|2353|4094	EGR1|FOS|MAF	-1.51866	HBV_related
GO Biological Processes	19	GO:0032873	negative regulation of stress-activated MAPK cascade	-2.65585	11.6021	5.4116	22539	47	124	3	2.41935	1.37981	2305|5187|9611	FOXM1|PER1|NCOR1	-1.51866	HBV_related
Canonical Pathways	11	M183	PID IL6 7 PATHWAY	-2.65585	11.6021	5.4116	22539	47	124	3	2.41935	1.37981	1052|2353|10401	CEBPD|FOS|PIAS3	-1.51866	HBV_related
Canonical Pathways	11	M236	PID DELTA NP63 PATHWAY	-2.65585	11.6021	5.4116	22539	47	124	3	2.41935	1.37981	675|1052|23541	BRCA2|CEBPD|SEC14L2	-1.51866	HBV_related
GO Biological Processes	19	GO:0030098	lymphocyte differentiation	-2.64846	3.89102	3.91679	22539	327	124	7	5.64516	2.07257	602|1958|4092|6304|6659|9935|51176	BCL3|EGR1|SMAD7|SATB1|SOX4|MAFB|LEF1	-1.51245	HBV_related
GO Biological Processes	19	GO:0006757	ATP generation from ADP	-2.64247	7.27065	4.67423	22539	100	124	4	3.22581	1.58668	863|9611|10891|51085	CBFA2T3|NCOR1|PPARGC1A|MLXIPL	-1.5074	HBV_related
GO Biological Processes	19	GO:0030324	lung development	-2.63257	5.4421	4.28542	22539	167	124	5	4.03226	1.76655	2627|3202|5308|6662|6943	GATA6|HOXA5|PITX2|SOX9|TCF21	-1.49806	HBV_related
GO Biological Processes	19	GO:0021545	cranial nerve development	-2.62956	11.3604	5.3443	22539	48	124	3	2.41935	1.37981	6299|7020|9935	SALL1|TFAP2A|MAFB	-1.49622	HBV_related
GO Biological Processes	19	GO:2000677	regulation of transcription regulatory region DNA binding	-2.62956	11.3604	5.3443	22539	48	124	3	2.41935	1.37981	142|9355|23493	PARP1|LHX2|HEY2	-1.49622	HBV_related
GO Biological Processes	19	GO:0010718	positive regulation of epithelial to mesenchymal transition	-2.62956	11.3604	5.3443	22539	48	124	3	2.41935	1.37981	2146|4088|51176	EZH2|SMAD3|LEF1	-1.49622	HBV_related
GO Biological Processes	19	GO:0098781	ncRNA transcription	-2.62675	7.19866	4.64371	22539	101	124	4	3.22581	1.58668	2960|2976|5440|6597	GTF2E1|GTF3C2|POLR2K|SMARCA4	-1.4943	HBV_related
GO Biological Processes	19	GO:0060322	head development	-2.62483	2.73519	3.5473	22539	731	124	11	8.87097	2.55331	473|675|2146|2547|4086|5308|6299|9355|9935|10891|51176	RERE|BRCA2|EZH2|XRCC6|SMAD1|PITX2|SALL1|LHX2|MAFB|PPARGC1A|LEF1	-1.49268	HBV_related
GO Biological Processes	19	GO:0051193	regulation of cofactor metabolic process	-2.6112	7.12808	4.61362	22539	102	124	4	3.22581	1.58668	863|9611|10891|51085	CBFA2T3|NCOR1|PPARGC1A|MLXIPL	-1.48169	HBV_related
GO Biological Processes	19	GO:0072132	mesenchyme morphogenesis	-2.60385	11.1285	5.27897	22539	49	124	3	2.41935	1.37981	4088|6662|51176	SMAD3|SOX9|LEF1	-1.47554	HBV_related
Reactome Gene Sets	6	R-HSA-6791312	TP53 Regulates Transcription of Cell Cycle Genes	-2.60385	11.1285	5.27897	22539	49	124	3	2.41935	1.37981	1820|4869|79733	ARID3A|NPM1|E2F8	-1.47554	HBV_related
GO Biological Processes	19	GO:0042866	pyruvate biosynthetic process	-2.59582	7.05888	4.58392	22539	103	124	4	3.22581	1.58668	863|9611|10891|51085	CBFA2T3|NCOR1|PPARGC1A|MLXIPL	-1.46865	HBV_related
GO Biological Processes	19	GO:0030323	respiratory tube development	-2.58809	5.3148	4.21254	22539	171	124	5	4.03226	1.76655	2627|3202|5308|6662|6943	GATA6|HOXA5|PITX2|SOX9|TCF21	-1.46267	HBV_related
Reactome Gene Sets	6	R-HSA-2262752	Cellular responses to stress	-2.5842	3.38958	3.71668	22539	429	124	8	6.45161	2.20618	367|2114|2146|2353|3159|4306|5931|23466	AR|ETS2|EZH2|FOS|HMGA1|NR3C2|RBBP7|CBX6	-1.45968	HBV_related
GO Biological Processes	19	GO:0048546	digestive tract morphogenesis	-2.57871	10.906	5.2155	22539	50	124	3	2.41935	1.37981	4088|5308|6943	SMAD3|PITX2|TCF21	-1.45474	HBV_related
GO Biological Processes	19	GO:0044283	small molecule biosynthetic process	-2.57497	2.69465	3.49126	22539	742	124	11	8.87097	2.55331	672|863|1958|4831|5092|9611|9971|10891|23408|23541|51085	BRCA1|CBFA2T3|EGR1|NME2|PCBD1|NCOR1|NR1H4|PPARGC1A|SIRT5|SEC14L2|MLXIPL	-1.45165	HBV_related
GO Biological Processes	19	GO:0071417	cellular response to organonitrogen compound	-2.57296	3.08659	3.61556	22539	530	124	9	7.25806	2.3299	142|672|1958|2146|6662|8462|9971|10891|53335	PARP1|BRCA1|EGR1|EZH2|SOX9|KLF11|NR1H4|PPARGC1A|BCL11A	-1.45101	HBV_related
GO Biological Processes	19	GO:0046031	ADP metabolic process	-2.56558	6.92442	4.52571	22539	105	124	4	3.22581	1.58668	863|9611|10891|51085	CBFA2T3|NCOR1|PPARGC1A|MLXIPL	-1.44496	HBV_related
GO Biological Processes	19	GO:2000045	regulation of G1/S transition of mitotic cell cycle	-2.55553	5.22316	4.15937	22539	174	124	5	4.03226	1.76655	1820|2146|4869|6659|79733	ARID3A|EZH2|NPM1|SOX4|E2F8	-1.43588	HBV_related
GO Biological Processes	19	GO:0021700	developmental maturation	-2.55348	4.31066	3.93874	22539	253	124	6	4.83871	1.92701	473|675|3202|9319|23294|53335	RERE|BRCA2|HOXA5|TRIP13|ANKS1A|BCL11A	-1.43525	HBV_related
GO Biological Processes	19	GO:0044773	mitotic DNA damage checkpoint	-2.5507	6.8591	4.49717	22539	106	124	4	3.22581	1.58668	1820|4869|6659|79733	ARID3A|NPM1|SOX4|E2F8	-1.43361	HBV_related
Reactome Gene Sets	6	R-HSA-5250913	Positive epigenetic regulation of rRNA expression	-2.5507	6.8591	4.49717	22539	106	124	4	3.22581	1.58668	5440|5931|11335|54815	POLR2K|RBBP7|CBX3|GATAD2A	-1.43361	HBV_related
GO Biological Processes	19	GO:0001654	eye development	-2.54713	3.73127	3.77993	22539	341	124	7	5.64516	2.07257	4088|4094|5308|6597|6662|7020|9355	SMAD3|MAF|PITX2|SMARCA4|SOX9|TFAP2A|LHX2	-1.43061	HBV_related
GO Biological Processes	19	GO:0072593	reactive oxygen species metabolic process	-2.5366	4.27685	3.91408	22539	255	124	6	4.83871	1.92701	672|2305|4088|7020|23408|23410	BRCA1|FOXM1|SMAD3|TFAP2A|SIRT5|SIRT3	-1.4215	HBV_related
GO Biological Processes	19	GO:0019083	viral transcription	-2.53419	5.16381	4.1246	22539	176	124	5	4.03226	1.76655	5440|6597|11074|22954|51176	POLR2K|SMARCA4|TRIM31|TRIM32|LEF1	-1.41992	HBV_related
GO Biological Processes	19	GO:0010608	posttranscriptional regulation of gene expression	-2.53057	2.65881	3.44118	22539	752	124	11	8.87097	2.55331	602|2099|4086|4088|4869|5187|5440|6659|9611|10140|22927	BCL3|ESR1|SMAD1|SMAD3|NPM1|PER1|POLR2K|SOX4|NCOR1|TOB1|HABP4	-1.41861	HBV_related
GO Biological Processes	19	GO:0010965	regulation of mitotic sister chromatid separation	-2.53004	10.4865	5.09379	22539	52	124	3	2.41935	1.37981	9232|9319|9700	PTTG1|TRIP13|ESPL1	-1.41861	HBV_related
Reactome Gene Sets	6	R-HSA-72165	mRNA Splicing - Minor Pathway	-2.53004	10.4865	5.09379	22539	52	124	3	2.41935	1.37981	5440|6628|6632	POLR2K|SNRPB|SNRPD1	-1.41861	HBV_related
Canonical Pathways	11	M220	PID CASPASE PATHWAY	-2.53004	10.4865	5.09379	22539	52	124	3	2.41935	1.37981	142|6304|7020	PARP1|SATB1|TFAP2A	-1.41861	HBV_related
GO Biological Processes	19	GO:0035904	aorta development	-2.53004	10.4865	5.09379	22539	52	124	3	2.41935	1.37981	4824|6659|23493	NKX3-1|SOX4|HEY2	-1.41861	HBV_related
GO Biological Processes	19	GO:0042093	T-helper cell differentiation	-2.53004	10.4865	5.09379	22539	52	124	3	2.41935	1.37981	602|4092|51176	BCL3|SMAD7|LEF1	-1.41861	HBV_related
GO Biological Processes	19	GO:0071241	cellular response to inorganic substance	-2.52363	5.13464	4.10741	22539	177	124	5	4.03226	1.76655	142|2353|2354|7020|10891	PARP1|FOS|FOSB|TFAP2A|PPARGC1A	-1.41417	HBV_related
GO Biological Processes	19	GO:0009156	ribonucleoside monophosphate biosynthetic process	-2.52363	5.13464	4.10741	22539	177	124	5	4.03226	1.76655	142|863|9611|10891|51085	PARP1|CBFA2T3|NCOR1|PPARGC1A|MLXIPL	-1.41417	HBV_related
GO Biological Processes	19	GO:1901796	regulation of signal transduction by p53 class mediator	-2.52363	5.13464	4.10741	22539	177	124	5	4.03226	1.76655	672|3090|5931|10614|51230	BRCA1|HIC1|RBBP7|HEXIM1|PHF20	-1.41417	HBV_related
GO Biological Processes	19	GO:0019218	regulation of steroid metabolic process	-2.52141	6.73208	4.44119	22539	108	124	4	3.22581	1.58668	1958|9971|10891|23541	EGR1|NR1H4|PPARGC1A|SEC14L2	-1.4125	HBV_related
GO Biological Processes	19	GO:0006353	DNA-templated transcription, termination	-2.52141	6.73208	4.44119	22539	108	124	4	3.22581	1.58668	5440|6628|8458|10921	POLR2K|SNRPB|TTF2|RNPS1	-1.4125	HBV_related
Reactome Gene Sets	6	R-HSA-1257604	PIP3 activates AKT signaling	-2.51988	4.24357	3.88966	22539	257	124	6	4.83871	1.92701	1958|2099|2146|5931|23466|54815	EGR1|ESR1|EZH2|RBBP7|CBX6|GATAD2A	-1.41153	HBV_related
GO Biological Processes	19	GO:0001666	response to hypoxia	-2.51915	3.68801	3.74215	22539	345	124	7	5.64516	2.07257	863|1958|2627|4088|4824|10891|79723	CBFA2T3|EGR1|GATA6|SMAD3|NKX3-1|PPARGC1A|SUV39H2	-1.41108	HBV_related
GO Biological Processes	19	GO:0007569	cell aging	-2.507	6.67032	4.41372	22539	109	124	4	3.22581	1.58668	675|2305|3159|4869	BRCA2|FOXM1|HMGA1|NPM1	-1.4006	HBV_related
GO Biological Processes	19	GO:0072009	nephron epithelium development	-2.507	6.67032	4.41372	22539	109	124	4	3.22581	1.58668	3217|6299|6662|6943	HOXB7|SALL1|SOX9|TCF21	-1.4006	HBV_related
GO Biological Processes	19	GO:0051306	mitotic sister chromatid separation	-2.48337	10.0981	4.97853	22539	54	124	3	2.41935	1.37981	9232|9319|9700	PTTG1|TRIP13|ESPL1	-1.38113	HBV_related
GO Biological Processes	19	GO:0090183	regulation of kidney development	-2.48337	10.0981	4.97853	22539	54	124	3	2.41935	1.37981	1958|3217|6662	EGR1|HOXB7|SOX9	-1.38113	HBV_related
GO Biological Processes	19	GO:0002294	CD4-positive, alpha-beta T cell differentiation involved in immune response	-2.48337	10.0981	4.97853	22539	54	124	3	2.41935	1.37981	602|4092|51176	BCL3|SMAD7|LEF1	-1.38113	HBV_related
GO Biological Processes	19	GO:0060563	neuroepithelial cell differentiation	-2.48337	10.0981	4.97853	22539	54	124	3	2.41935	1.37981	6659|23493|51176	SOX4|HEY2|LEF1	-1.38113	HBV_related
GO Biological Processes	19	GO:0040008	regulation of growth	-2.47736	2.7793	3.4345	22539	654	124	10	8.06452	2.44523	367|2627|3621|4088|5931|6597|22954|23493|51176|53335	AR|GATA6|ING1|SMAD3|RBBP7|SMARCA4|TRIM32|HEY2|LEF1|BCL11A	-1.37594	HBV_related
GO Biological Processes	19	GO:0044774	mitotic DNA integrity checkpoint	-2.46465	6.49165	4.33336	22539	112	124	4	3.22581	1.58668	1820|4869|6659|79733	ARID3A|NPM1|SOX4|E2F8	-1.3669	HBV_related
Reactome Gene Sets	6	R-HSA-73864	RNA Polymerase I Transcription	-2.46465	6.49165	4.33336	22539	112	124	4	3.22581	1.58668	5440|5931|11335|54815	POLR2K|RBBP7|CBX3|GATAD2A	-1.3669	HBV_related
GO Biological Processes	19	GO:0042633	hair cycle	-2.46465	6.49165	4.33336	22539	112	124	4	3.22581	1.58668	5187|6662|9079|9355	PER1|SOX9|LDB2|LHX2	-1.3669	HBV_related
GO Biological Processes	19	GO:0042303	molting cycle	-2.46465	6.49165	4.33336	22539	112	124	4	3.22581	1.58668	5187|6662|9079|9355	PER1|SOX9|LDB2|LHX2	-1.3669	HBV_related
GO Biological Processes	19	GO:0036293	response to decreased oxygen levels	-2.46442	3.60443	3.66825	22539	353	124	7	5.64516	2.07257	863|1958|2627|4088|4824|10891|79723	CBFA2T3|EGR1|GATA6|SMAD3|NKX3-1|PPARGC1A|SUV39H2	-1.3669	HBV_related
GO Biological Processes	19	GO:0007179	transforming growth factor beta receptor signaling pathway	-2.46171	4.96629	4.00693	22539	183	124	5	4.03226	1.76655	142|2353|4086|4088|4092	PARP1|FOS|SMAD1|SMAD3|SMAD7	-1.36466	HBV_related
GO Biological Processes	19	GO:0002287	alpha-beta T cell activation involved in immune response	-2.46075	9.91452	4.92313	22539	55	124	3	2.41935	1.37981	602|4092|51176	BCL3|SMAD7|LEF1	-1.36451	HBV_related
GO Biological Processes	19	GO:0002293	alpha-beta T cell differentiation involved in immune response	-2.46075	9.91452	4.92313	22539	55	124	3	2.41935	1.37981	602|4092|51176	BCL3|SMAD7|LEF1	-1.36451	HBV_related
GO Biological Processes	19	GO:0043388	positive regulation of DNA binding	-2.46075	9.91452	4.92313	22539	55	124	3	2.41935	1.37981	142|3148|5308	PARP1|HMGB2|PITX2	-1.36451	HBV_related
GO Biological Processes	19	GO:0003012	muscle system process	-2.45229	3.22423	3.54887	22539	451	124	8	6.45161	2.20618	142|2146|2627|4088|4092|9569|10891|23493	PARP1|EZH2|GATA6|SMAD3|SMAD7|GTF2IRD1|PPARGC1A|HEY2	-1.3566	HBV_related
GO Biological Processes	19	GO:0051216	cartilage development	-2.45163	4.9393	3.99061	22539	184	124	5	4.03226	1.76655	3202|4086|4088|4094|6662	HOXA5|SMAD1|SMAD3|MAF|SOX9	-1.35621	HBV_related
GO Biological Processes	19	GO:1901987	regulation of cell cycle phase transition	-2.4465	3.2171	3.54148	22539	452	124	8	6.45161	2.20618	672|1820|2146|4869|6659|9319|9700|79733	BRCA1|ARID3A|EZH2|NPM1|SOX4|TRIP13|ESPL1|E2F8	-1.35182	HBV_related
GO Biological Processes	19	GO:0007369	gastrulation	-2.44161	4.9126	3.97441	22539	185	124	5	4.03226	1.76655	2114|2627|4086|4088|51176	ETS2|GATA6|SMAD1|SMAD3|LEF1	-1.34943	HBV_related
GO Biological Processes	19	GO:0060348	bone development	-2.44161	4.9126	3.97441	22539	185	124	5	4.03226	1.76655	4086|4665|5308|6662|7020	SMAD1|NAB2|PITX2|SOX9|TFAP2A	-1.34943	HBV_related
GO Biological Processes	19	GO:1905818	regulation of chromosome separation	-2.43856	9.73747	4.86913	22539	56	124	3	2.41935	1.37981	9232|9319|9700	PTTG1|TRIP13|ESPL1	-1.34772	HBV_related
GO Biological Processes	19	GO:0045667	regulation of osteoblast differentiation	-2.43713	6.37776	4.28141	22539	114	124	4	3.22581	1.58668	4086|4088|10140|23051	SMAD1|SMAD3|TOB1|ZHX3	-1.34656	HBV_related
GO Biological Processes	19	GO:0009124	nucleoside monophosphate biosynthetic process	-2.42177	4.86006	3.94235	22539	187	124	5	4.03226	1.76655	142|863|9611|10891|51085	PARP1|CBFA2T3|NCOR1|PPARGC1A|MLXIPL	-1.3323	HBV_related
GO Biological Processes	19	GO:0042471	ear morphogenesis	-2.41016	6.2678	4.23068	22539	116	124	4	3.22581	1.58668	6299|6662|7020|9935	SALL1|SOX9|TFAP2A|MAFB	-1.32332	HBV_related
GO Biological Processes	19	GO:0007127	meiosis I	-2.41016	6.2678	4.23068	22539	116	124	4	3.22581	1.58668	675|9232|9319|9700	BRCA2|PTTG1|TRIP13|ESPL1	-1.32332	HBV_related
GO Biological Processes	19	GO:0006606	protein import into nucleus	-2.40721	4.02434	3.72541	22539	271	124	6	4.83871	1.92701	142|473|602|4088|4601|10140	PARP1|RERE|BCL3|SMAD3|MXI1|TOB1	-1.32116	HBV_related
GO Biological Processes	19	GO:0016032	viral process	-2.40237	2.55681	3.29564	22539	782	124	11	8.87097	2.55331	2547|2960|3159|4088|4869|5440|6304|6597|11074|22954|51176	XRCC6|GTF2E1|HMGA1|SMAD3|NPM1|POLR2K|SATB1|SMARCA4|TRIM31|TRIM32|LEF1	-1.31659	HBV_related
GO Biological Processes	19	GO:0042692	muscle cell differentiation	-2.39823	3.50513	3.57883	22539	363	124	7	5.64516	2.07257	2146|2627|5308|6662|22954|23493|51176	EZH2|GATA6|PITX2|SOX9|TRIM32|HEY2|LEF1	-1.31351	HBV_related
GO Biological Processes	19	GO:0032651	regulation of interleukin-1 beta production	-2.39548	9.4017	4.7651	22539	58	124	3	2.41935	1.37981	1958|4088|10626	EGR1|SMAD3|TRIM16	-1.31181	HBV_related
GO Biological Processes	19	GO:0019080	viral gene expression	-2.39247	4.78332	3.89511	22539	190	124	5	4.03226	1.76655	5440|6597|11074|22954|51176	POLR2K|SMARCA4|TRIM31|TRIM32|LEF1	-1.30987	HBV_related
GO Biological Processes	19	GO:0002573	myeloid leukocyte differentiation	-2.39247	4.78332	3.89511	22539	190	124	5	4.03226	1.76655	142|863|2353|9935|51176	PARP1|CBFA2T3|FOS|MAFB|LEF1	-1.30987	HBV_related
GO Biological Processes	19	GO:0061982	meiosis I cell cycle process	-2.38372	6.16156	4.18113	22539	118	124	4	3.22581	1.58668	675|9232|9319|9700	BRCA2|PTTG1|TRIP13|ESPL1	-1.3019	HBV_related
GO Biological Processes	19	GO:0003407	neural retina development	-2.37454	9.24235	4.71496	22539	59	124	3	2.41935	1.37981	6597|6662|7020	SMARCA4|SOX9|TFAP2A	-1.29456	HBV_related
GO Biological Processes	19	GO:0043124	negative regulation of I-kappaB kinase/NF-kappaB signaling	-2.37454	9.24235	4.71496	22539	59	124	3	2.41935	1.37981	2099|5187|9971	ESR1|PER1|NR1H4	-1.29456	HBV_related
GO Biological Processes	19	GO:1902806	regulation of cell cycle G1/S phase transition	-2.37325	4.73349	3.86416	22539	192	124	5	4.03226	1.76655	1820|2146|4869|6659|79733	ARID3A|EZH2|NPM1|SOX4|E2F8	-1.29405	HBV_related
GO Biological Processes	19	GO:0050792	regulation of viral process	-2.37325	4.73349	3.86416	22539	192	124	5	4.03226	1.76655	5440|6597|11074|22954|51176	POLR2K|SMARCA4|TRIM31|TRIM32|LEF1	-1.29405	HBV_related
GO Biological Processes	19	GO:1900542	regulation of purine nucleotide metabolic process	-2.37325	4.73349	3.86416	22539	192	124	5	4.03226	1.76655	142|863|9611|10891|51085	PARP1|CBFA2T3|NCOR1|PPARGC1A|MLXIPL	-1.29405	HBV_related
GO Biological Processes	19	GO:0022612	gland morphogenesis	-2.37069	6.10979	4.15678	22539	119	124	4	3.22581	1.58668	367|2099|4824|6662	AR|ESR1|NKX3-1|SOX9	-1.29279	HBV_related
GO Biological Processes	19	GO:0051146	striated muscle cell differentiation	-2.36872	3.95144	3.6694	22539	276	124	6	4.83871	1.92701	2146|2627|5308|22954|23493|51176	EZH2|GATA6|PITX2|TRIM32|HEY2|LEF1	-1.29108	HBV_related
GO Biological Processes	19	GO:0045143	homologous chromosome segregation	-2.35399	9.08831	4.66599	22539	60	124	3	2.41935	1.37981	9232|9319|9700	PTTG1|TRIP13|ESPL1	-1.27843	HBV_related
GO Biological Processes	19	GO:0014032	neural crest cell development	-2.35399	9.08831	4.66599	22539	60	124	3	2.41935	1.37981	5308|6662|51176	PITX2|SOX9|LEF1	-1.27843	HBV_related
KEGG Pathway	24	hsa05210	Colorectal cancer	-2.35399	9.08831	4.66599	22539	60	124	3	2.41935	1.37981	2353|4088|51176	FOS|SMAD3|LEF1	-1.27843	HBV_related
GO Biological Processes	19	GO:0043467	regulation of generation of precursor metabolites and energy	-2.34501	6.0088	4.10891	22539	121	124	4	3.22581	1.58668	863|9611|10891|51085	CBFA2T3|NCOR1|PPARGC1A|MLXIPL	-1.271	HBV_related
GO Biological Processes	19	GO:0009135	purine nucleoside diphosphate metabolic process	-2.34501	6.0088	4.10891	22539	121	124	4	3.22581	1.58668	863|9611|10891|51085	CBFA2T3|NCOR1|PPARGC1A|MLXIPL	-1.271	HBV_related
GO Biological Processes	19	GO:0009179	purine ribonucleoside diphosphate metabolic process	-2.34501	6.0088	4.10891	22539	121	124	4	3.22581	1.58668	863|9611|10891|51085	CBFA2T3|NCOR1|PPARGC1A|MLXIPL	-1.271	HBV_related
GO Biological Processes	19	GO:0071229	cellular response to acid chemical	-2.33553	4.63689	3.80353	22539	196	124	5	4.03226	1.76655	1958|6662|9971|10891|53335	EGR1|SOX9|NR1H4|PPARGC1A|BCL11A	-1.26254	HBV_related
GO Biological Processes	19	GO:0002292	T cell differentiation involved in immune response	-2.33382	8.93932	4.61815	22539	61	124	3	2.41935	1.37981	602|4092|51176	BCL3|SMAD7|LEF1	-1.26135	HBV_related
GO Biological Processes	19	GO:2000756	regulation of peptidyl-lysine acetylation	-2.33382	8.93932	4.61815	22539	61	124	3	2.41935	1.37981	672|6659|10891	BRCA1|SOX4|PPARGC1A	-1.26135	HBV_related
GO Biological Processes	19	GO:0032479	regulation of type I interferon production	-2.33236	5.95955	4.08538	22539	122	124	4	3.22581	1.58668	2547|3148|5440|22954	XRCC6|HMGB2|POLR2K|TRIM32	-1.26014	HBV_related
GO Biological Processes	19	GO:0032606	type I interferon production	-2.31982	5.91109	4.0621	22539	123	124	4	3.22581	1.58668	2547|3148|5440|22954	XRCC6|HMGB2|POLR2K|TRIM32	-1.24889	HBV_related
GO Biological Processes	19	GO:0009185	ribonucleoside diphosphate metabolic process	-2.31982	5.91109	4.0621	22539	123	124	4	3.22581	1.58668	863|9611|10891|51085	CBFA2T3|NCOR1|PPARGC1A|MLXIPL	-1.24889	HBV_related
GO Biological Processes	19	GO:0071456	cellular response to hypoxia	-2.31701	4.59005	3.77382	22539	198	124	5	4.03226	1.76655	1958|2627|4824|10891|79723	EGR1|GATA6|NKX3-1|PPARGC1A|SUV39H2	-1.24685	HBV_related
GO Biological Processes	19	GO:0033047	regulation of mitotic sister chromatid segregation	-2.31401	8.79514	4.5714	22539	62	124	3	2.41935	1.37981	9232|9319|9700	PTTG1|TRIP13|ESPL1	-1.24436	HBV_related
GO Biological Processes	19	GO:0070482	response to oxygen levels	-2.30946	3.37497	3.45878	22539	377	124	7	5.64516	2.07257	863|1958|2627|4088|4824|10891|79723	CBFA2T3|EGR1|GATA6|SMAD3|NKX3-1|PPARGC1A|SUV39H2	-1.24032	HBV_related
GO Biological Processes	19	GO:0009152	purine ribonucleotide biosynthetic process	-2.30892	3.84013	3.58247	22539	284	124	6	4.83871	1.92701	142|863|4831|9611|10891|51085	PARP1|CBFA2T3|NME2|NCOR1|PPARGC1A|MLXIPL	-1.24029	HBV_related
GO Biological Processes	19	GO:0006140	regulation of nucleotide metabolic process	-2.30783	4.56699	3.75912	22539	199	124	5	4.03226	1.76655	142|863|9611|10891|51085	PARP1|CBFA2T3|NCOR1|PPARGC1A|MLXIPL	-1.23946	HBV_related
Reactome Gene Sets	6	R-HSA-2559580	Oxidative Stress Induced Senescence	-2.29509	5.81652	4.01631	22539	125	124	4	3.22581	1.58668	2146|2353|5931|23466	EZH2|FOS|RBBP7|CBX6	-1.22951	HBV_related
Canonical Pathways	11	M254	PID MYC REPRESS PATHWAY	-2.29455	8.65553	4.52569	22539	63	124	3	2.41935	1.37981	672|1052|4088	BRCA1|CEBPD|SMAD3	-1.22921	HBV_related
GO Biological Processes	19	GO:0006164	purine nucleotide biosynthetic process	-2.27981	3.78679	3.54018	22539	288	124	6	4.83871	1.92701	142|863|4831|9611|10891|51085	PARP1|CBFA2T3|NME2|NCOR1|PPARGC1A|MLXIPL	-1.21802	HBV_related
GO Biological Processes	19	GO:0055008	cardiac muscle tissue morphogenesis	-2.27542	8.52029	4.48099	22539	64	124	3	2.41935	1.37981	4092|5308|23493	SMAD7|PITX2|HEY2	-1.21587	HBV_related
GO Biological Processes	19	GO:0048864	stem cell development	-2.27542	8.52029	4.48099	22539	64	124	3	2.41935	1.37981	5308|6662|51176	PITX2|SOX9|LEF1	-1.21587	HBV_related
GO Biological Processes	19	GO:0046889	positive regulation of lipid biosynthetic process	-2.27542	8.52029	4.48099	22539	64	124	3	2.41935	1.37981	9971|10891|51085	NR1H4|PPARGC1A|MLXIPL	-1.21587	HBV_related
GO Biological Processes	19	GO:0060038	cardiac muscle cell proliferation	-2.27542	8.52029	4.48099	22539	64	124	3	2.41935	1.37981	2627|4086|23493	GATA6|SMAD1|HEY2	-1.21587	HBV_related
GO Biological Processes	19	GO:0030326	embryonic limb morphogenesis	-2.27082	5.72492	3.9715	22539	127	124	4	3.22581	1.58668	5308|6299|7020|51176	PITX2|SALL1|TFAP2A|LEF1	-1.21226	HBV_related
GO Biological Processes	19	GO:0035113	embryonic appendage morphogenesis	-2.27082	5.72492	3.9715	22539	127	124	4	3.22581	1.58668	5308|6299|7020|51176	PITX2|SALL1|TFAP2A|LEF1	-1.21226	HBV_related
Reactome Gene Sets	6	R-HSA-9006925	Intracellular signaling by second messengers	-2.26545	3.76068	3.51932	22539	290	124	6	4.83871	1.92701	1958|2099|2146|5931|23466|54815	EGR1|ESR1|EZH2|RBBP7|CBX6|GATAD2A	-1.20814	HBV_related
GO Biological Processes	19	GO:0072330	monocarboxylic acid biosynthetic process	-2.26545	3.76068	3.51932	22539	290	124	6	4.83871	1.92701	672|863|9611|9971|10891|51085	BRCA1|CBFA2T3|NCOR1|NR1H4|PPARGC1A|MLXIPL	-1.20814	HBV_related
GO Biological Processes	19	GO:0030858	positive regulation of epithelial cell differentiation	-2.25663	8.38921	4.43725	22539	65	124	3	2.41935	1.37981	4831|6662|10626	NME2|SOX9|TRIM16	-1.20055	HBV_related
GO Biological Processes	19	GO:0051298	centrosome duplication	-2.25663	8.38921	4.43725	22539	65	124	3	2.41935	1.37981	672|675|4869	BRCA1|BRCA2|NPM1	-1.20055	HBV_related
GO Biological Processes	19	GO:0036294	cellular response to decreased oxygen levels	-2.25394	4.43332	3.67288	22539	205	124	5	4.03226	1.76655	1958|2627|4824|10891|79723	EGR1|GATA6|NKX3-1|PPARGC1A|SUV39H2	-1.19861	HBV_related
GO Biological Processes	19	GO:0001649	osteoblast differentiation	-2.24515	4.4118	3.65883	22539	206	124	5	4.03226	1.76655	4086|4088|10140|23051|51176	SMAD1|SMAD3|TOB1|ZHX3|LEF1	-1.19129	HBV_related
GO Biological Processes	19	GO:0001756	somitogenesis	-2.23815	8.2621	4.39443	22539	66	124	3	2.41935	1.37981	4088|4824|51176	SMAD3|NKX3-1|LEF1	-1.18503	HBV_related
Canonical Pathways	11	M255	PID HIF1 TFPATHWAY	-2.23815	8.2621	4.39443	22539	66	124	3	2.41935	1.37981	2353|4088|4869	FOS|SMAD3|NPM1	-1.18503	HBV_related
GO Biological Processes	19	GO:1903320	regulation of protein modification by small protein conjugation or removal	-2.23641	4.39049	3.64487	22539	207	124	5	4.03226	1.76655	672|1958|4092|6659|10401	BRCA1|EGR1|SMAD7|SOX4|PIAS3	-1.18402	HBV_related
GO Biological Processes	19	GO:0060560	developmental growth involved in morphogenesis	-2.23641	4.39049	3.64487	22539	207	124	5	4.03226	1.76655	2099|6299|6662|9355|53335	ESR1|SALL1|SOX9|LHX2|BCL11A	-1.18402	HBV_related
GO Biological Processes	19	GO:0019363	pyridine nucleotide biosynthetic process	-2.23524	5.5928	3.90605	22539	130	124	4	3.22581	1.58668	863|9611|10891|51085	CBFA2T3|NCOR1|PPARGC1A|MLXIPL	-1.18335	HBV_related
GO Biological Processes	19	GO:0019359	nicotinamide nucleotide biosynthetic process	-2.23524	5.5928	3.90605	22539	130	124	4	3.22581	1.58668	863|9611|10891|51085	CBFA2T3|NCOR1|PPARGC1A|MLXIPL	-1.18335	HBV_related
GO Biological Processes	19	GO:0001558	regulation of cell growth	-2.22492	3.25413	3.34425	22539	391	124	7	5.64516	2.07257	3621|4088|5931|6597|22954|51176|53335	ING1|SMAD3|RBBP7|SMARCA4|TRIM32|LEF1|BCL11A	-1.17401	HBV_related
GO Biological Processes	19	GO:0046683	response to organophosphorus	-2.22359	5.55011	3.88468	22539	131	124	4	3.22581	1.58668	2353|2354|5187|10626	FOS|FOSB|PER1|TRIM16	-1.17292	HBV_related
GO Biological Processes	19	GO:0032611	interleukin-1 beta production	-2.21998	8.13878	4.35251	22539	67	124	3	2.41935	1.37981	1958|4088|10626	EGR1|SMAD3|TRIM16	-1.17005	HBV_related
GO Biological Processes	19	GO:0030500	regulation of bone mineralization	-2.21998	8.13878	4.35251	22539	67	124	3	2.41935	1.37981	4088|6662|7020	SMAD3|SOX9|TFAP2A	-1.17005	HBV_related
GO Biological Processes	19	GO:0033002	muscle cell proliferation	-2.21907	4.34847	3.61722	22539	209	124	5	4.03226	1.76655	2547|2627|4086|10891|23493	XRCC6|GATA6|SMAD1|PPARGC1A|HEY2	-1.16938	HBV_related
GO Biological Processes	19	GO:0009260	ribonucleotide biosynthetic process	-2.21617	3.67204	3.44774	22539	297	124	6	4.83871	1.92701	142|863|4831|9611|10891|51085	PARP1|CBFA2T3|NME2|NCOR1|PPARGC1A|MLXIPL	-1.16696	HBV_related
GO Biological Processes	19	GO:0006354	DNA-templated transcription, elongation	-2.21204	5.50806	3.86353	22539	132	124	4	3.22581	1.58668	2146|2960|5440|6919	EZH2|GTF2E1|POLR2K|TCEA2	-1.16381	HBV_related
GO Biological Processes	19	GO:0014033	neural crest cell differentiation	-2.20211	8.01909	4.31145	22539	68	124	3	2.41935	1.37981	5308|6662|51176	PITX2|SOX9|LEF1	-1.15589	HBV_related
Reactome Gene Sets	6	R-HSA-6796648	TP53 Regulates Transcription of DNA Repair Genes	-2.20211	8.01909	4.31145	22539	68	124	3	2.41935	1.37981	672|2353|5440	BRCA1|FOS|POLR2K	-1.15589	HBV_related
Reactome Gene Sets	6	R-HSA-68867	Assembly of the pre-replicative complex	-2.20211	8.01909	4.31145	22539	68	124	3	2.41935	1.37981	4171|4173|4175	MCM2|MCM4|MCM6	-1.15589	HBV_related
GO Biological Processes	19	GO:2001234	negative regulation of apoptotic signaling pathway	-2.20194	4.30725	3.58991	22539	211	124	5	4.03226	1.76655	367|672|3148|7703|22954	AR|BRCA1|HMGB2|PCGF2|TRIM32	-1.15589	HBV_related
GO Biological Processes	19	GO:0072525	pyridine-containing compound biosynthetic process	-2.2006	5.46665	3.8426	22539	133	124	4	3.22581	1.58668	863|9611|10891|51085	CBFA2T3|NCOR1|PPARGC1A|MLXIPL	-1.15479	HBV_related
GO Biological Processes	19	GO:0104004	cellular response to environmental stimulus	-2.1955	3.63532	3.41772	22539	300	124	6	4.83871	1.92701	142|1958|2547|4869|6662|22927	PARP1|EGR1|XRCC6|NPM1|SOX9|HABP4	-1.15066	HBV_related
GO Biological Processes	19	GO:0071214	cellular response to abiotic stimulus	-2.1955	3.63532	3.41772	22539	300	124	6	4.83871	1.92701	142|1958|2547|4869|6662|22927	PARP1|EGR1|XRCC6|NPM1|SOX9|HABP4	-1.15066	HBV_related
GO Biological Processes	19	GO:0060968	regulation of gene silencing	-2.18925	5.42585	3.82187	22539	134	124	4	3.22581	1.58668	2099|3159|5440|9611	ESR1|HMGA1|POLR2K|NCOR1	-1.14616	HBV_related
GO Biological Processes	19	GO:0072522	purine-containing compound biosynthetic process	-2.18867	3.62325	3.40779	22539	301	124	6	4.83871	1.92701	142|863|4831|9611|10891|51085	PARP1|CBFA2T3|NME2|NCOR1|PPARGC1A|MLXIPL	-1.14616	HBV_related
GO Biological Processes	19	GO:0046390	ribose phosphate biosynthetic process	-2.18867	3.62325	3.40779	22539	301	124	6	4.83871	1.92701	142|863|4831|9611|10891|51085	PARP1|CBFA2T3|NME2|NCOR1|PPARGC1A|MLXIPL	-1.14616	HBV_related
GO Biological Processes	19	GO:0034404	nucleobase-containing small molecule biosynthetic process	-2.18501	4.26681	3.56293	22539	213	124	5	4.03226	1.76655	863|4831|9611|10891|51085	CBFA2T3|NME2|NCOR1|PPARGC1A|MLXIPL	-1.14329	HBV_related
GO Biological Processes	19	GO:0035914	skeletal muscle cell differentiation	-2.18453	7.90288	4.27122	22539	69	124	3	2.41935	1.37981	1958|2353|3131	EGR1|FOS|HLF	-1.14329	HBV_related
GO Biological Processes	19	GO:0006369	termination of RNA polymerase II transcription	-2.18453	7.90288	4.27122	22539	69	124	3	2.41935	1.37981	6628|8458|10921	SNRPB|TTF2|RNPS1	-1.14329	HBV_related
GO Biological Processes	19	GO:0006090	pyruvate metabolic process	-2.17801	5.38566	3.80136	22539	135	124	4	3.22581	1.58668	863|9611|10891|51085	CBFA2T3|NCOR1|PPARGC1A|MLXIPL	-1.13868	HBV_related
GO Biological Processes	19	GO:0045814	negative regulation of gene expression, epigenetic	-2.17801	5.38566	3.80136	22539	135	124	4	3.22581	1.58668	2146|3159|5931|23408	EZH2|HMGA1|RBBP7|SIRT5	-1.13868	HBV_related
Reactome Gene Sets	6	R-HSA-1834949	Cytosolic sensors of pathogen-associated DNA	-2.16723	7.78998	4.23179	22539	70	124	3	2.41935	1.37981	2547|5440|22954	XRCC6|POLR2K|TRIM32	-1.13004	HBV_related
GO Biological Processes	19	GO:1901983	regulation of protein acetylation	-2.16723	7.78998	4.23179	22539	70	124	3	2.41935	1.37981	672|6659|10891	BRCA1|SOX4|PPARGC1A	-1.13004	HBV_related
GO Biological Processes	19	GO:0046822	regulation of nucleocytoplasmic transport	-2.15997	4.20755	3.52308	22539	216	124	5	4.03226	1.76655	142|602|4088|4601|6659	PARP1|BCL3|SMAD3|MXI1|SOX4	-1.12325	HBV_related
Reactome Gene Sets	6	R-HSA-8953897	Cellular responses to external stimuli	-2.15746	2.87377	3.1707	22539	506	124	8	6.45161	2.20618	367|2114|2146|2353|3159|4306|5931|23466	AR|ETS2|EZH2|FOS|HMGA1|NR3C2|RBBP7|CBX6	-1.12192	HBV_related
GO Biological Processes	19	GO:0060041	retina development in camera-type eye	-2.15581	5.30704	3.76093	22539	137	124	4	3.22581	1.58668	6597|6662|7020|9355	SMARCA4|SOX9|TFAP2A|LHX2	-1.1207	HBV_related
GO Biological Processes	19	GO:0010817	regulation of hormone levels	-2.15251	2.8681	3.1643	22539	507	124	8	6.45161	2.20618	1958|2099|4824|6659|8431|9971|10891|23410	EGR1|ESR1|NKX3-1|SOX4|NR0B2|NR1H4|PPARGC1A|SIRT3	-1.11839	HBV_related
Reactome Gene Sets	6	R-HSA-3214841	PKMTs methylate histone lysines	-2.15021	7.68026	4.19314	22539	71	124	3	2.41935	1.37981	2146|5931|79723	EZH2|RBBP7|SUV39H2	-1.11726	HBV_related
Reactome Gene Sets	6	R-HSA-68949	Orc1 removal from chromatin	-2.15021	7.68026	4.19314	22539	71	124	3	2.41935	1.37981	4171|4173|4175	MCM2|MCM4|MCM6	-1.11726	HBV_related
GO Biological Processes	19	GO:0030279	negative regulation of ossification	-2.15021	7.68026	4.19314	22539	71	124	3	2.41935	1.37981	4088|6662|10140	SMAD3|SOX9|TOB1	-1.11726	HBV_related
Reactome Gene Sets	6	R-HSA-69052	Switching of origins to a post-replicative state	-2.15021	7.68026	4.19314	22539	71	124	3	2.41935	1.37981	4171|4173|4175	MCM2|MCM4|MCM6	-1.11726	HBV_related
KEGG Pathway	24	hsa04371	Apelin signaling pathway	-2.14485	5.26858	3.74101	22539	138	124	4	3.22581	1.58668	1958|4088|4899|10891	EGR1|SMAD3|NRF1|PPARGC1A	-1.11237	HBV_related
GO Biological Processes	19	GO:0033500	carbohydrate homeostasis	-2.14352	4.16895	3.49692	22539	218	124	5	4.03226	1.76655	6597|6659|9971|10891|51085	SMARCA4|SOX4|NR1H4|PPARGC1A|MLXIPL	-1.11198	HBV_related
GO Biological Processes	19	GO:0043903	regulation of symbiosis, encompassing mutualism through parasitism	-2.14352	4.16895	3.49692	22539	218	124	5	4.03226	1.76655	5440|6597|11074|22954|51176	POLR2K|SMARCA4|TRIM31|TRIM32|LEF1	-1.11198	HBV_related
GO Biological Processes	19	GO:0042593	glucose homeostasis	-2.14352	4.16895	3.49692	22539	218	124	5	4.03226	1.76655	6597|6659|9971|10891|51085	SMARCA4|SOX4|NR1H4|PPARGC1A|MLXIPL	-1.11198	HBV_related
GO Biological Processes	19	GO:0009205	purine ribonucleoside triphosphate metabolic process	-2.14165	3.5409	3.33951	22539	308	124	6	4.83871	1.92701	142|863|4831|9611|10891|51085	PARP1|CBFA2T3|NME2|NCOR1|PPARGC1A|MLXIPL	-1.11057	HBV_related
GO Biological Processes	19	GO:0048738	cardiac muscle tissue development	-2.13536	4.14991	3.48395	22539	219	124	5	4.03226	1.76655	2627|4086|4092|5308|23493	GATA6|SMAD1|SMAD7|PITX2|HEY2	-1.10522	HBV_related
GO Biological Processes	19	GO:0032481	positive regulation of type I interferon production	-2.13345	7.57359	4.15523	22539	72	124	3	2.41935	1.37981	2547|3148|5440	XRCC6|HMGB2|POLR2K	-1.1047	HBV_related
GO Biological Processes	19	GO:0048844	artery morphogenesis	-2.13345	7.57359	4.15523	22539	72	124	3	2.41935	1.37981	4092|6659|23493	SMAD7|SOX4|HEY2	-1.1047	HBV_related
GO Biological Processes	19	GO:0021675	nerve development	-2.13345	7.57359	4.15523	22539	72	124	3	2.41935	1.37981	6299|7020|9935	SALL1|TFAP2A|MAFB	-1.1047	HBV_related
GO Biological Processes	19	GO:0071453	cellular response to oxygen levels	-2.11919	4.11236	3.45825	22539	221	124	5	4.03226	1.76655	1958|2627|4824|10891|79723	EGR1|GATA6|NKX3-1|PPARGC1A|SUV39H2	-1.09183	HBV_related
Reactome Gene Sets	6	R-HSA-69300	Removal of licensing factors from origins	-2.11694	7.46984	4.11805	22539	73	124	3	2.41935	1.37981	4171|4173|4175	MCM2|MCM4|MCM6	-1.09028	HBV_related
GO Biological Processes	19	GO:0033045	regulation of sister chromatid segregation	-2.11694	7.46984	4.11805	22539	73	124	3	2.41935	1.37981	9232|9319|9700	PTTG1|TRIP13|ESPL1	-1.09028	HBV_related
Reactome Gene Sets	6	R-HSA-1980143	Signaling by NOTCH1	-2.11694	7.46984	4.11805	22539	73	124	3	2.41935	1.37981	7089|9611|23493	TLE2|NCOR1|HEY2	-1.09028	HBV_related
GO Biological Processes	19	GO:2000241	regulation of reproductive process	-2.11253	5.15649	3.6824	22539	141	124	4	3.22581	1.58668	367|2099|4824|6662	AR|ESR1|NKX3-1|SOX9	-1.08656	HBV_related
GO Biological Processes	19	GO:0060070	canonical Wnt signaling pathway	-2.10891	3.48433	3.29193	22539	313	124	6	4.83871	1.92701	1958|4088|6659|6662|7089|51176	EGR1|SMAD3|SOX4|SOX9|TLE2|LEF1	-1.08317	HBV_related
GO Biological Processes	19	GO:0009199	ribonucleoside triphosphate metabolic process	-2.10244	3.47324	3.28253	22539	314	124	6	4.83871	1.92701	142|863|4831|9611|10891|51085	PARP1|CBFA2T3|NME2|NCOR1|PPARGC1A|MLXIPL	-1.07762	HBV_related
GO Biological Processes	19	GO:0051384	response to glucocorticoid	-2.10193	5.12017	3.66323	22539	142	124	4	3.22581	1.58668	687|2353|2354|11335	KLF9|FOS|FOSB|CBX3	-1.07758	HBV_related
Reactome Gene Sets	6	R-HSA-3214847	HATs acetylate histones	-2.10193	5.12017	3.66323	22539	142	124	4	3.22581	1.58668	1810|5931|51230|55689	DR1|RBBP7|PHF20|YEATS2	-1.07758	HBV_related
GO Biological Processes	19	GO:0001707	mesoderm formation	-2.10069	7.3689	4.08156	22539	74	124	3	2.41935	1.37981	4086|4088|51176	SMAD1|SMAD3|LEF1	-1.07726	HBV_related
GO Biological Processes	19	GO:0032642	regulation of chemokine production	-2.10069	7.3689	4.08156	22539	74	124	3	2.41935	1.37981	1958|9971|22954	EGR1|NR1H4|TRIM32	-1.07726	HBV_related
GO Biological Processes	19	GO:0043627	response to estrogen	-2.10069	7.3689	4.08156	22539	74	124	3	2.41935	1.37981	672|2099|2627	BRCA1|ESR1|GATA6	-1.07726	HBV_related
GO Biological Processes	19	GO:0003208	cardiac ventricle morphogenesis	-2.10069	7.3689	4.08156	22539	74	124	3	2.41935	1.37981	4092|6659|23493	SMAD7|SOX4|HEY2	-1.07726	HBV_related
GO Biological Processes	19	GO:0009144	purine nucleoside triphosphate metabolic process	-2.096	3.46221	3.27317	22539	315	124	6	4.83871	1.92701	142|863|4831|9611|10891|51085	PARP1|CBFA2T3|NME2|NCOR1|PPARGC1A|MLXIPL	-1.07416	HBV_related
GO Biological Processes	19	GO:0090092	regulation of transmembrane receptor protein serine/threonine kinase signaling pathway	-2.08737	4.03925	3.40775	22539	225	124	5	4.03226	1.76655	142|2627|4088|4092|10140	PARP1|GATA6|SMAD3|SMAD7|TOB1	-1.06766	HBV_related
GO Biological Processes	19	GO:1903321	negative regulation of protein modification by small protein conjugation or removal	-2.08469	7.27065	4.04574	22539	75	124	3	2.41935	1.37981	4092|6659|10401	SMAD7|SOX4|PIAS3	-1.06536	HBV_related
Reactome Gene Sets	6	R-HSA-73894	DNA Repair	-2.08319	3.44037	3.25456	22539	317	124	6	4.83871	1.92701	142|672|675|2547|5440|10401	PARP1|BRCA1|BRCA2|XRCC6|POLR2K|PIAS3	-1.0641	HBV_related
GO Biological Processes	19	GO:0016202	regulation of striated muscle tissue development	-2.081	5.04906	3.62543	22539	144	124	4	3.22581	1.58668	2627|4088|23493|51176	GATA6|SMAD3|HEY2|LEF1	-1.06236	HBV_related
GO Biological Processes	19	GO:0070167	regulation of biomineral tissue development	-2.06892	7.17498	4.01058	22539	76	124	3	2.41935	1.37981	4088|6662|7020	SMAD3|SOX9|TFAP2A	-1.05367	HBV_related
GO Biological Processes	19	GO:0003151	outflow tract morphogenesis	-2.06892	7.17498	4.01058	22539	76	124	3	2.41935	1.37981	2627|5308|23493	GATA6|PITX2|HEY2	-1.05367	HBV_related
Reactome Gene Sets	6	R-HSA-69304	Regulation of DNA replication	-2.06892	7.17498	4.01058	22539	76	124	3	2.41935	1.37981	4171|4173|4175	MCM2|MCM4|MCM6	-1.05367	HBV_related
Reactome Gene Sets	6	R-HSA-3108214	SUMOylation of DNA damage response and repair proteins	-2.06892	7.17498	4.01058	22539	76	124	3	2.41935	1.37981	142|672|7703	PARP1|BRCA1|PCGF2	-1.05367	HBV_related
GO Biological Processes	19	GO:0021536	diencephalon development	-2.06892	7.17498	4.01058	22539	76	124	3	2.41935	1.37981	5308|6299|51176	PITX2|SALL1|LEF1	-1.05367	HBV_related
GO Biological Processes	19	GO:0048332	mesoderm morphogenesis	-2.06892	7.17498	4.01058	22539	76	124	3	2.41935	1.37981	4086|4088|51176	SMAD1|SMAD3|LEF1	-1.05367	HBV_related
GO Biological Processes	19	GO:0031016	pancreas development	-2.06892	7.17498	4.01058	22539	76	124	3	2.41935	1.37981	2627|6659|6662	GATA6|SOX4|SOX9	-1.05367	HBV_related
Reactome Gene Sets	6	R-HSA-427389	ERCC6 (CSB) and EHMT2 (G9a) positively regulate rRNA expression	-2.06892	7.17498	4.01058	22539	76	124	3	2.41935	1.37981	5931|11335|54815	RBBP7|CBX3|GATAD2A	-1.05367	HBV_related
GO Biological Processes	19	GO:0014855	striated muscle cell proliferation	-2.05338	7.0818	3.97605	22539	77	124	3	2.41935	1.37981	2627|4086|23493	GATA6|SMAD1|HEY2	-1.0397	HBV_related
GO Biological Processes	19	GO:0014074	response to purine-containing compound	-2.05025	4.94602	3.57002	22539	147	124	4	3.22581	1.58668	2353|2354|5187|10891	FOS|FOSB|PER1|PPARGC1A	-1.0368	HBV_related
GO Biological Processes	19	GO:0017038	protein import	-2.04541	3.37646	3.19962	22539	323	124	6	4.83871	1.92701	142|473|602|4088|4601|10140	PARP1|RERE|BCL3|SMAD3|MXI1|TOB1	-1.03263	HBV_related
GO Biological Processes	19	GO:0048634	regulation of muscle organ development	-2.04016	4.9126	3.55188	22539	148	124	4	3.22581	1.58668	2627|4088|23493|51176	GATA6|SMAD3|HEY2|LEF1	-1.02873	HBV_related
GO Biological Processes	19	GO:0051304	chromosome separation	-2.03807	6.991	3.94214	22539	78	124	3	2.41935	1.37981	9232|9319|9700	PTTG1|TRIP13|ESPL1	-1.02752	HBV_related
GO Biological Processes	19	GO:0060415	muscle tissue morphogenesis	-2.03807	6.991	3.94214	22539	78	124	3	2.41935	1.37981	4092|5308|23493	SMAD7|PITX2|HEY2	-1.02752	HBV_related
GO Biological Processes	19	GO:0034502	protein localization to chromosome	-2.03807	6.991	3.94214	22539	78	124	3	2.41935	1.37981	675|2099|2146	BRCA2|ESR1|EZH2	-1.02752	HBV_related
GO Biological Processes	19	GO:0001101	response to acid chemical	-2.03301	3.35568	3.18159	22539	325	124	6	4.83871	1.92701	1958|6662|9971|10626|10891|53335	EGR1|SOX9|NR1H4|TRIM16|PPARGC1A|BCL11A	-1.02314	HBV_related
GO Biological Processes	19	GO:0008380	RNA splicing	-2.03022	2.98677	3.07912	22539	426	124	7	5.64516	2.07257	5440|6628|6632|8458|10891|10921|22927	POLR2K|SNRPB|SNRPD1|TTF2|PPARGC1A|RNPS1|HABP4	-1.02079	HBV_related
Reactome Gene Sets	6	R-HSA-201681	TCF dependent signaling in response to WNT	-2.0258	3.90056	3.31015	22539	233	124	5	4.03226	1.76655	6597|6659|6662|7089|51176	SMARCA4|SOX4|SOX9|TLE2|LEF1	-1.01703	HBV_related
GO Biological Processes	19	GO:0045926	negative regulation of growth	-2.0258	3.90056	3.31015	22539	233	124	5	4.03226	1.76655	3621|4088|5931|6597|53335	ING1|SMAD3|RBBP7|SMARCA4|BCL11A	-1.01703	HBV_related
Reactome Gene Sets	6	R-HSA-162906	HIV Infection	-2.01829	3.88389	3.29826	22539	234	124	5	4.03226	1.76655	2547|2960|3159|4869|5440	XRCC6|GTF2E1|HMGA1|NPM1|POLR2K	-1.01063	HBV_related
GO Biological Processes	19	GO:1902532	negative regulation of intracellular signal transduction	-2.00562	2.70284	2.97333	22539	538	124	8	6.45161	2.20618	602|2099|2305|5187|9611|9971|22954|23410	BCL3|ESR1|FOXM1|PER1|NCOR1|NR1H4|TRIM32|SIRT3	-0.999287	HBV_related
GO Biological Processes	19	GO:0000122	negative regulation of transcription by RNA polymerase II	-29.7696	8.92704	18.1754	22539	789	144	45	31.25	3.8626	367|1602|1649|1788|1810|1958|2099|2114|2117|2146|2305|2627|3066|3204|3394|3397|4092|4094|4854|5993|6297|6299|6595|6597|6662|6929|6940|6943|7227|8091|8431|8864|9603|9611|9971|10614|23314|23414|23462|23493|51176|55689|64750|79733|83463	AR|DACH1|DDIT3|DNMT3A|DR1|EGR1|ESR1|ETS2|ETV3|EZH2|FOXM1|GATA6|HDAC2|HOXA7|IRF8|ID1|SMAD7|MAF|NOTCH3|RFX5|SALL2|SALL1|SMARCA2|SMARCA4|SOX9|TCF3|ZNF354A|TCF21|TRPS1|HMGA2|NR0B2|PER2|NFE2L3|NCOR1|NR1H4|HEXIM1|SATB2|ZFPM2|HEY1|HEY2|LEF1|YEATS2|SMURF2|E2F8|MXD3	-25.7702	HCV_related
GO Biological Processes	19	GO:0006325	chromatin organization	-20.5473	7.28946	14.2685	22539	773	144	36	25	3.60844	1643|1788|1810|2099|2146|3066|3148|4171|4869|5934|6299|6595|6597|6599|6604|6662|8091|8464|8864|9329|9611|9971|10284|10626|10891|11108|11169|22955|23314|23408|51176|51317|51742|55636|55689|79885	DDB2|DNMT3A|DR1|ESR1|EZH2|HDAC2|HMGB2|MCM2|NPM1|RBL2|SALL1|SMARCA2|SMARCA4|SMARCC1|SMARCD3|SOX9|HMGA2|SUPT3H|PER2|GTF3C4|NCOR1|NR1H4|SAP18|TRIM16|PPARGC1A|PRDM4|WDHD1|SCMH1|SATB2|SIRT5|LEF1|PHF21A|ARID4B|CHD7|YEATS2|HDAC11	-16.849	HCV_related
GO Biological Processes	19	GO:0016569	covalent chromatin modification	-15.7216	7.58719	12.6228	22539	557	144	27	18.75	3.2526	1643|1788|1810|2146|3066|5934|6299|6597|6599|6604|8091|8464|8864|9329|9611|9971|10284|10626|10891|11108|23314|51176|51317|51742|55636|55689|79885	DDB2|DNMT3A|DR1|EZH2|HDAC2|RBL2|SALL1|SMARCA4|SMARCC1|SMARCD3|HMGA2|SUPT3H|PER2|GTF3C4|NCOR1|NR1H4|SAP18|TRIM16|PPARGC1A|PRDM4|SATB2|LEF1|PHF21A|ARID4B|CHD7|YEATS2|HDAC11	-12.1994	HCV_related
GO Biological Processes	19	GO:0006352	DNA-templated transcription, initiation	-13.7096	11.6904	13.3792	22539	241	144	18	12.5	2.75599	367|1602|2099|3394|4306|4854|6095|6662|8431|8856|9329|9968|9970|9971|10891|10923|23493|64425	AR|DACH1|ESR1|IRF8|NR3C2|NOTCH3|RORA|SOX9|NR0B2|NR1I2|GTF3C4|MED12|NR1I3|NR1H4|PPARGC1A|SUB1|HEY2|POLR1E	-10.4506	HCV_related
GO Biological Processes	19	GO:0006367	transcription initiation from RNA polymerase II promoter	-13.1799	13.4642	13.6872	22539	186	144	16	11.1111	2.61891	367|1602|2099|3394|4306|4854|6095|6662|8431|8856|9968|9970|9971|10891|10923|23493	AR|DACH1|ESR1|IRF8|NR3C2|NOTCH3|RORA|SOX9|NR0B2|NR1I2|MED12|NR1I3|NR1H4|PPARGC1A|SUB1|HEY2	-10.0436	HCV_related
GO Biological Processes	19	GO:0071407	cellular response to organic cyclic compound	-12.6553	6.60193	10.8528	22539	569	144	24	16.6667	3.10565	367|687|1958|2099|2146|3066|3397|4306|4613|4869|6047|6095|6597|6943|8431|8856|9611|9968|9970|9971|10891|23462|51176|79753	AR|KLF9|EGR1|ESR1|EZH2|HDAC2|ID1|NR3C2|MYCN|NPM1|RNF4|RORA|SMARCA4|TCF21|NR0B2|NR1I2|NCOR1|MED12|NR1I3|NR1H4|PPARGC1A|HEY1|LEF1|SNIP1	-9.58537	HCV_related
Canonical Pathways	11	M2	PID SMAD2 3NUCLEAR PATHWAY	-11.3304	20.9967	14.5463	22539	82	144	11	7.63889	2.21349	367|1875|2099|2353|3066|4092|6929|9611|10284|10401|79753	AR|E2F5|ESR1|FOS|HDAC2|SMAD7|TCF3|NCOR1|SAP18|PIAS3|SNIP1	-8.41305	HCV_related
GO Biological Processes	19	GO:0071383	cellular response to steroid hormone stimulus	-10.9925	9.70672	11.2787	22539	258	144	16	11.1111	2.61891	367|687|2099|4306|6047|6095|6597|6943|8431|8856|9968|9970|9971|10891|23462|51176	AR|KLF9|ESR1|NR3C2|RNF4|RORA|SMARCA4|TCF21|NR0B2|NR1I2|MED12|NR1I3|NR1H4|PPARGC1A|HEY1|LEF1	-8.16931	HCV_related
GO Biological Processes	19	GO:0043401	steroid hormone mediated signaling pathway	-10.6394	11.4727	11.6552	22539	191	144	14	9.72222	2.46883	367|2099|4306|6047|6095|6597|6943|8431|8856|9968|9970|9971|10891|51176	AR|ESR1|NR3C2|RNF4|RORA|SMARCA4|TCF21|NR0B2|NR1I2|MED12|NR1I3|NR1H4|PPARGC1A|LEF1	-7.8442	HCV_related
GO Biological Processes	19	GO:0043392	negative regulation of DNA binding	-10.4766	27.6213	15.2617	22539	51	144	9	6.25	2.01718	1649|3066|3397|8091|8864|22927|23462|23493|51176	DDIT3|HDAC2|ID1|HMGA2|PER2|HABP4|HEY1|HEY2|LEF1	-7.70775	HCV_related
GO Biological Processes	19	GO:0048545	response to steroid hormone	-10.2019	7.24261	9.95904	22539	389	144	18	12.5	2.75599	367|687|2099|2353|3148|4306|6047|6095|6597|6943|8431|8856|9968|9970|9971|10891|23462|51176	AR|KLF9|ESR1|FOS|HMGB2|NR3C2|RNF4|RORA|SMARCA4|TCF21|NR0B2|NR1I2|MED12|NR1I3|NR1H4|PPARGC1A|HEY1|LEF1	-7.44557	HCV_related
GO Biological Processes	19	GO:0016570	histone modification	-10.1524	6.68291	9.70906	22539	445	144	19	13.1944	2.82025	1643|1810|2146|3066|6299|8091|8464|8864|9329|9971|10284|10626|10891|11108|51176|51317|51742|55689|79885	DDB2|DR1|EZH2|HDAC2|SALL1|HMGA2|SUPT3H|PER2|GTF3C4|NR1H4|SAP18|TRIM16|PPARGC1A|PRDM4|LEF1|PHF21A|ARID4B|YEATS2|HDAC11	-7.42027	HCV_related
GO Biological Processes	19	GO:0048568	embryonic organ development	-9.56256	6.61356	9.37956	22539	426	144	18	12.5	2.75599	1750|3200|3202|3204|4613|6299|6662|6943|7289|9935|9968|23314|23414|23462|23493|51176|55636|79733	DLX6|HOXA3|HOXA5|HOXA7|MYCN|SALL1|SOX9|TCF21|TULP3|MAFB|MED12|SATB2|ZFPM2|HEY1|HEY2|LEF1|CHD7|E2F8	-6.88545	HCV_related
GO Biological Processes	19	GO:0009755	hormone-mediated signaling pathway	-9.5153	9.44522	10.3681	22539	232	144	14	9.72222	2.46883	367|2099|4306|6047|6095|6597|6943|8431|8856|9968|9970|9971|10891|51176	AR|ESR1|NR3C2|RNF4|RORA|SMARCA4|TCF21|NR0B2|NR1I2|MED12|NR1I3|NR1H4|PPARGC1A|LEF1	-6.85839	HCV_related
GO Biological Processes	19	GO:0051090	regulation of DNA binding transcription factor activity	-9.25743	6.8227	9.30129	22539	390	144	17	11.8056	2.68895	367|1649|2099|2146|2353|3066|3397|4092|4869|6597|6929|7158|8431|9971|10346|10891|22954	AR|DDIT3|ESR1|EZH2|FOS|HDAC2|ID1|SMAD7|NPM1|SMARCA4|TCF3|TP53BP1|NR0B2|NR1H4|TRIM22|PPARGC1A|TRIM32	-6.63832	HCV_related
GO Biological Processes	19	GO:0030855	epithelial cell differentiation	-9.22699	4.72438	8.3868	22539	762	144	23	15.9722	3.0529	367|1750|2099|2146|2627|3066|3202|3204|3397|4094|4613|4831|5991|6299|6662|6943|10626|23462|23493|26298|51176|51742|79733	AR|DLX6|ESR1|EZH2|GATA6|HDAC2|HOXA5|HOXA7|ID1|MAF|MYCN|NME2|RFX3|SALL1|SOX9|TCF21|TRIM16|HEY1|HEY2|EHF|LEF1|ARID4B|E2F8	-6.61855	HCV_related
GO Biological Processes	19	GO:0071396	cellular response to lipid	-9.20943	5.52102	8.74292	22539	567	144	20	13.8889	2.88192	367|687|2099|3066|3148|3394|4306|6047|6095|6597|6662|6943|8431|8856|9968|9970|9971|10891|23462|51176	AR|KLF9|ESR1|HDAC2|HMGB2|IRF8|NR3C2|RNF4|RORA|SMARCA4|SOX9|TCF21|NR0B2|NR1I2|MED12|NR1I3|NR1H4|PPARGC1A|HEY1|LEF1	-6.61855	HCV_related
GO Biological Processes	19	GO:0006338	chromatin remodeling	-9.11695	11.3148	10.6958	22539	166	144	12	8.33333	2.30321	2099|3066|4869|6595|6597|6599|6604|6662|8091|22955|23314|55636	ESR1|HDAC2|NPM1|SMARCA2|SMARCA4|SMARCC1|SMARCD3|SOX9|HMGA2|SCMH1|SATB2|CHD7	-6.54087	HCV_related
Reactome Gene Sets	6	R-HSA-383280	Nuclear Receptor transcription pathway	-9.01019	25.0433	13.6477	22539	50	144	8	5.55556	1.90885	367|2099|4306|6095|8431|8856|9970|9971	AR|ESR1|NR3C2|RORA|NR0B2|NR1I2|NR1I3|NR1H4	-6.45455	HCV_related
Reactome Gene Sets	6	R-HSA-4839726	Chromatin organization	-8.55508	7.96833	9.32303	22539	275	144	14	9.72222	2.46883	1788|1810|2146|3066|6595|6597|6599|6604|8464|9611|10284|51317|51742|55689	DNMT3A|DR1|EZH2|HDAC2|SMARCA2|SMARCA4|SMARCC1|SMARCD3|SUPT3H|NCOR1|SAP18|PHF21A|ARID4B|YEATS2	-6.05406	HCV_related
Reactome Gene Sets	6	R-HSA-3247509	Chromatin modifying enzymes	-8.55508	7.96833	9.32303	22539	275	144	14	9.72222	2.46883	1788|1810|2146|3066|6595|6597|6599|6604|8464|9611|10284|51317|51742|55689	DNMT3A|DR1|EZH2|HDAC2|SMARCA2|SMARCA4|SMARCC1|SMARCD3|SUPT3H|NCOR1|SAP18|PHF21A|ARID4B|YEATS2	-6.05406	HCV_related
GO Biological Processes	19	GO:0051101	regulation of DNA binding	-8.49558	13.7299	10.9263	22539	114	144	10	6.94444	2.1184	1649|3066|3148|3397|8091|8864|22927|23462|23493|51176	DDIT3|HDAC2|HMGB2|ID1|HMGA2|PER2|HABP4|HEY1|HEY2|LEF1	-6.00814	HCV_related
GO Biological Processes	19	GO:0043009	chordate embryonic development	-8.46286	5.29163	8.2617	22539	562	144	19	13.1944	2.82025	367|2627|3200|3202|3204|4613|6297|6662|6949|7289|9915|9968|23314|23414|23462|23493|51176|55636|79733	AR|GATA6|HOXA3|HOXA5|HOXA7|MYCN|SALL2|SOX9|TCOF1|TULP3|ARNT2|MED12|SATB2|ZFPM2|HEY1|HEY2|LEF1|CHD7|E2F8	-5.98857	HCV_related
GO Biological Processes	19	GO:0061061	muscle structure development	-8.32148	4.89893	8.01747	22539	639	144	20	13.8889	2.88192	1649|1958|2146|2353|2627|3131|4092|6095|6604|6662|6929|6943|9328|22954|23414|23462|23493|50804|51176|55636	DDIT3|EGR1|EZH2|FOS|GATA6|HLF|SMAD7|RORA|SMARCD3|SOX9|TCF3|TCF21|GTF3C5|TRIM32|ZFPM2|HEY1|HEY2|MYEF2|LEF1|CHD7	-5.86308	HCV_related
Reactome Gene Sets	6	R-HSA-8878166	Transcriptional regulation by RUNX2	-8.24276	12.9356	10.5561	22539	121	144	10	6.94444	2.1184	367|1750|2099|4091|4094|6662|10891|23314|23462|23493	AR|DLX6|ESR1|SMAD6|MAF|SOX9|PPARGC1A|SATB2|HEY1|HEY2	-5.80344	HCV_related
GO Biological Processes	19	GO:0009792	embryo development ending in birth or egg hatching	-8.24047	5.12741	8.07511	22539	580	144	19	13.1944	2.82025	367|2627|3200|3202|3204|4613|6297|6662|6949|7289|9915|9968|23314|23414|23462|23493|51176|55636|79733	AR|GATA6|HOXA3|HOXA5|HOXA7|MYCN|SALL2|SOX9|TCOF1|TULP3|ARNT2|MED12|SATB2|ZFPM2|HEY1|HEY2|LEF1|CHD7|E2F8	-5.80344	HCV_related
GO Biological Processes	19	GO:0048598	embryonic morphogenesis	-8.20422	5.10102	8.04476	22539	583	144	19	13.1944	2.82025	367|1750|2114|2627|3066|3200|3202|3204|4613|6299|6662|6943|7289|8091|9935|9968|23314|51176|55636	AR|DLX6|ETS2|GATA6|HDAC2|HOXA3|HOXA5|HOXA7|MYCN|SALL1|SOX9|TCF21|TULP3|HMGA2|MAFB|MED12|SATB2|LEF1|CHD7	-5.77309	HCV_related
GO Biological Processes	19	GO:0007389	pattern specification process	-7.92037	5.97693	8.24592	22539	419	144	16	11.1111	2.61891	367|1649|2114|3200|3202|3204|4091|5991|6604|7289|9935|9968|22955|23314|23493|51176	AR|DDIT3|ETS2|HOXA3|HOXA5|HOXA7|SMAD6|RFX3|SMARCD3|TULP3|MAFB|MED12|SCMH1|SATB2|HEY2|LEF1	-5.5443	HCV_related
GO Biological Processes	19	GO:0032870	cellular response to hormone stimulus	-7.78429	4.55002	7.58321	22539	688	144	20	13.8889	2.88192	367|687|2099|2353|2627|4306|6047|6095|6597|6599|6943|8431|8856|9968|9970|9971|10891|23462|51176|83990	AR|KLF9|ESR1|FOS|GATA6|NR3C2|RNF4|RORA|SMARCA4|SMARCC1|TCF21|NR0B2|NR1I2|MED12|NR1I3|NR1H4|PPARGC1A|HEY1|LEF1|BRIP1	-5.43333	HCV_related
GO Biological Processes	19	GO:0048608	reproductive structure development	-7.76288	5.82403	8.09885	22539	430	144	16	11.1111	2.61891	367|2099|2627|3148|6299|6599|6662|6943|23414|23462|23493|51176|51742|55636|79733|83990	AR|ESR1|GATA6|HMGB2|SALL1|SMARCC1|SOX9|TCF21|ZFPM2|HEY1|HEY2|LEF1|ARID4B|CHD7|E2F8|BRIP1	-5.42376	HCV_related
GO Biological Processes	19	GO:0061458	reproductive system development	-7.72076	5.78368	8.05962	22539	433	144	16	11.1111	2.61891	367|2099|2627|3148|6299|6599|6662|6943|23414|23462|23493|51176|51742|55636|79733|83990	AR|ESR1|GATA6|HMGB2|SALL1|SMARCC1|SOX9|TCF21|ZFPM2|HEY1|HEY2|LEF1|ARID4B|CHD7|E2F8|BRIP1	-5.39812	HCV_related
GO Biological Processes	19	GO:0045786	negative regulation of cell cycle	-7.67534	4.72797	7.60397	22539	629	144	19	13.1944	2.82025	580|1649|1820|2146|2305|2627|4869|5934|7158|8091|9232|9319|9700|9735|10614|10657|57472|79733|83990	BARD1|DDIT3|ARID3A|EZH2|FOXM1|GATA6|NPM1|RBL2|TP53BP1|HMGA2|PTTG1|TRIP13|ESPL1|KNTC1|HEXIM1|KHDRBS1|CNOT6|E2F8|BRIP1	-5.37062	HCV_related
Canonical Pathways	11	M288	PID HES HEY PATHWAY	-7.65376	22.826	12.1382	22539	48	144	7	4.86111	1.79211	367|2627|3397|6929|9611|23462|23493	AR|GATA6|ID1|TCF3|NCOR1|HEY1|HEY2	-5.36329	HCV_related
KEGG Pathway	24	hsa05202	Transcriptional misregulation in cancer	-7.63613	9.56516	9.25143	22539	180	144	11	7.63889	2.21349	1649|2118|3066|4094|4613|6929|8091|8464|8864|9611|9915	DDIT3|ETV4|HDAC2|MAF|MYCN|TCF3|HMGA2|SUPT3H|PER2|NCOR1|ARNT2	-5.3528	HCV_related
CORUM	33	CORUM:387	MCM complex	-7.62465	104.347	20.3015	22539	6	144	4	2.77778	1.36946	4171|4172|4173|4176	MCM2|MCM3|MCM4|MCM7	-5.34549	HCV_related
GO Biological Processes	19	GO:0071824	protein-DNA complex subunit organization	-7.5954	7.39917	8.56153	22539	275	144	13	9.02778	2.38816	1602|1643|2099|3148|4171|4869|6047|6597|6599|6604|6662|6666|23493	DACH1|DDB2|ESR1|HMGB2|MCM2|NPM1|RNF4|SMARCA4|SMARCC1|SMARCD3|SOX9|SOX12|HEY2	-5.32443	HCV_related
GO Biological Processes	19	GO:0003002	regionalization	-7.56788	6.66046	8.29352	22539	329	144	14	9.72222	2.46883	367|1649|2114|3200|3202|3204|4091|6604|7289|9935|9968|22955|23493|51176	AR|DDIT3|ETS2|HOXA3|HOXA5|HOXA7|SMAD6|SMARCD3|TULP3|MAFB|MED12|SCMH1|HEY2|LEF1	-5.30095	HCV_related
GO Biological Processes	19	GO:0030522	intracellular receptor signaling pathway	-7.41287	7.13955	8.36408	22539	285	144	13	9.02778	2.38816	367|2099|2146|6047|6095|6597|6943|8856|9968|9970|9971|10626|10891	AR|ESR1|EZH2|RNF4|RORA|SMARCA4|TCF21|NR1I2|MED12|NR1I3|NR1H4|TRIM16|PPARGC1A	-5.17697	HCV_related
GO Biological Processes	19	GO:0048562	embryonic organ morphogenesis	-7.39502	7.11458	8.34486	22539	286	144	13	9.02778	2.38816	1750|3200|3202|3204|4613|6299|6662|6943|7289|9935|9968|23314|55636	DLX6|HOXA3|HOXA5|HOXA7|MYCN|SALL1|SOX9|TCF21|TULP3|MAFB|MED12|SATB2|CHD7	-5.16339	HCV_related
CORUM	33	CORUM:739	SIN3-ING1b complex II	-7.38747	48.9128	15.3731	22539	16	144	5	3.47222	1.52563	3066|6597|6599|10284|51742	HDAC2|SMARCA4|SMARCC1|SAP18|ARID4B	-5.16339	HCV_related
GO Biological Processes	19	GO:0003006	developmental process involved in reproduction	-7.35543	4.51274	7.33886	22539	659	144	19	13.1944	2.82025	367|1602|2099|2627|3148|6299|6595|6599|6662|6943|9319|23414|23462|23493|51176|51742|55636|79733|83990	AR|DACH1|ESR1|GATA6|HMGB2|SALL1|SMARCA2|SMARCC1|SOX9|TCF21|TRIP13|ZFPM2|HEY1|HEY2|LEF1|ARID4B|CHD7|E2F8|BRIP1	-5.13786	HCV_related
Reactome Gene Sets	6	R-HSA-8941326	RUNX2 regulates bone development	-7.31513	29.3477	12.8676	22539	32	144	6	4.16667	1.66522	367|4091|4094|23314|23462|23493	AR|SMAD6|MAF|SATB2|HEY1|HEY2	-5.10113	HCV_related
GO Biological Processes	19	GO:0051100	negative regulation of binding	-7.21011	10.0981	9.11406	22539	155	144	10	6.94444	2.1184	1649|3066|3397|8091|8864|22927|23394|23462|23493|51176	DDIT3|HDAC2|ID1|HMGA2|PER2|HABP4|ADNP|HEY1|HEY2|LEF1	-5.01696	HCV_related
GO Biological Processes	19	GO:0060485	mesenchyme development	-7.19726	7.63516	8.3907	22539	246	144	12	8.33333	2.30321	2146|3066|3202|4092|6662|6943|6949|8091|23414|23462|23493|51176	EZH2|HDAC2|HOXA5|SMAD7|SOX9|TCF21|TCOF1|HMGA2|ZFPM2|HEY1|HEY2|LEF1	-5.0075	HCV_related
KEGG Pathway	24	hsa04110	Cell cycle	-6.97908	11.3604	9.27643	22539	124	144	9	6.25	2.01718	1875|3066|4171|4172|4173|4176|5934|9232|9700	E2F5|HDAC2|MCM2|MCM3|MCM4|MCM7|RBL2|PTTG1|ESPL1	-4.81544	HCV_related
GO Biological Processes	19	GO:0044772	mitotic cell cycle phase transition	-6.93764	4.75153	7.20877	22539	560	144	17	11.8056	2.68895	1820|2146|2305|4171|4172|4173|4176|4869|5934|6604|8091|9319|9700|9735|10657|57472|79733	ARID3A|EZH2|FOXM1|MCM2|MCM3|MCM4|MCM7|NPM1|RBL2|SMARCD3|HMGA2|TRIP13|ESPL1|KNTC1|KHDRBS1|CNOT6|E2F8	-4.78341	HCV_related
GO Biological Processes	19	GO:0007548	sex differentiation	-6.81043	7.03464	7.9541	22539	267	144	12	8.33333	2.30321	367|1602|2099|2627|3148|6299|6662|6943|23414|51742|55636|83990	AR|DACH1|ESR1|GATA6|HMGB2|SALL1|SOX9|TCF21|ZFPM2|ARID4B|CHD7|BRIP1	-4.67144	HCV_related
GO Biological Processes	19	GO:0001568	blood vessel development	-6.77634	4.14192	6.86093	22539	718	144	19	13.1944	2.82025	1649|1958|2627|3200|3202|3204|3397|4091|4092|4854|6095|6943|8091|23414|23462|23493|51176|55636|79733	DDIT3|EGR1|GATA6|HOXA3|HOXA5|HOXA7|ID1|SMAD6|SMAD7|NOTCH3|RORA|TCF21|HMGA2|ZFPM2|HEY1|HEY2|LEF1|CHD7|E2F8	-4.64368	HCV_related
GO Biological Processes	19	GO:0045137	development of primary sexual characteristics	-6.74672	7.82604	8.15842	22539	220	144	11	7.63889	2.21349	367|1602|2099|2627|3148|6299|6662|6943|23414|51742|83990	AR|DACH1|ESR1|GATA6|HMGB2|SALL1|SOX9|TCF21|ZFPM2|ARID4B|BRIP1	-4.62333	HCV_related
GO Biological Processes	19	GO:2000678	negative regulation of transcription regulatory region DNA binding	-6.73038	37.2669	13.3327	22539	21	144	5	3.47222	1.52563	1649|3397|8864|23462|23493	DDIT3|ID1|PER2|HEY1|HEY2	-4.61483	HCV_related
GO Biological Processes	19	GO:0018205	peptidyl-lysine modification	-6.69891	5.66225	7.41836	22539	387	144	14	9.72222	2.46883	1810|1958|2146|3066|7158|8464|9329|10401|10626|10891|23408|51176|51742|55689	DR1|EGR1|EZH2|HDAC2|TP53BP1|SUPT3H|GTF3C4|PIAS3|TRIM16|PPARGC1A|SIRT5|LEF1|ARID4B|YEATS2	-4.58889	HCV_related
GO Biological Processes	19	GO:0008584	male gonad development	-6.63451	10.358	8.77733	22539	136	144	9	6.25	2.01718	367|2099|2627|3148|6662|6943|23414|51742|83990	AR|ESR1|GATA6|HMGB2|SOX9|TCF21|ZFPM2|ARID4B|BRIP1	-4.54098	HCV_related
GO Biological Processes	19	GO:0030521	androgen receptor signaling pathway	-6.62537	16.3529	10.0919	22539	67	144	7	4.86111	1.79211	367|6047|6597|6943|9968|9970|10891	AR|RNF4|SMARCA4|TCF21|MED12|NR1I3|PPARGC1A	-4.53453	HCV_related
GO Biological Processes	19	GO:0006476	protein deacetylation	-6.62082	12.6481	9.31379	22539	99	144	8	5.55556	1.90885	3066|6299|8864|10284|23408|51317|51742|79885	HDAC2|SALL1|PER2|SAP18|SIRT5|PHF21A|ARID4B|HDAC11	-4.53265	HCV_related
GO Biological Processes	19	GO:0046546	development of primary male sexual characteristics	-6.60734	10.2824	8.73857	22539	137	144	9	6.25	2.01718	367|2099|2627|3148|6662|6943|23414|51742|83990	AR|ESR1|GATA6|HMGB2|SOX9|TCF21|ZFPM2|ARID4B|BRIP1	-4.52812	HCV_related
GO Biological Processes	19	GO:0003279	cardiac septum development	-6.58693	12.5217	9.25927	22539	100	144	8	5.55556	1.90885	2627|4091|4092|6299|23414|23462|23493|55636	GATA6|SMAD6|SMAD7|SALL1|ZFPM2|HEY1|HEY2|CHD7	-4.51703	HCV_related
GO Biological Processes	19	GO:0001837	epithelial to mesenchymal transition	-6.58039	10.2079	8.70019	22539	138	144	9	6.25	2.01718	2146|3066|4092|6662|6949|8091|23462|23493|51176	EZH2|HDAC2|SMAD7|SOX9|TCOF1|HMGA2|HEY1|HEY2|LEF1	-4.51303	HCV_related
GO Biological Processes	19	GO:0001944	vasculature development	-6.54886	4.00255	6.6736	22539	743	144	19	13.1944	2.82025	1649|1958|2627|3200|3202|3204|3397|4091|4092|4854|6095|6943|8091|23414|23462|23493|51176|55636|79733	DDIT3|EGR1|GATA6|HOXA3|HOXA5|HOXA7|ID1|SMAD6|SMAD7|NOTCH3|RORA|TCF21|HMGA2|ZFPM2|HEY1|HEY2|LEF1|CHD7|E2F8	-4.48832	HCV_related
GO Biological Processes	19	GO:0060411	cardiac septum morphogenesis	-6.53636	15.8789	9.92563	22539	69	144	7	4.86111	1.79211	2627|4091|4092|23414|23462|23493|55636	GATA6|SMAD6|SMAD7|ZFPM2|HEY1|HEY2|CHD7	-4.47904	HCV_related
GO Biological Processes	19	GO:0044770	cell cycle phase transition	-6.50492	4.42738	6.82911	22539	601	144	17	11.8056	2.68895	1820|2146|2305|4171|4172|4173|4176|4869|5934|6604|8091|9319|9700|9735|10657|57472|79733	ARID3A|EZH2|FOXM1|MCM2|MCM3|MCM4|MCM7|NPM1|RBL2|SMARCD3|HMGA2|TRIP13|ESPL1|KNTC1|KHDRBS1|CNOT6|E2F8	-4.45499	HCV_related
GO Biological Processes	19	GO:0072358	cardiovascular system development	-6.47812	3.95991	6.61537	22539	751	144	19	13.1944	2.82025	1649|1958|2627|3200|3202|3204|3397|4091|4092|4854|6095|6943|8091|23414|23462|23493|51176|55636|79733	DDIT3|EGR1|GATA6|HOXA3|HOXA5|HOXA7|ID1|SMAD6|SMAD7|NOTCH3|RORA|TCF21|HMGA2|ZFPM2|HEY1|HEY2|LEF1|CHD7|E2F8	-4.43328	HCV_related
GO Biological Processes	19	GO:0051098	regulation of binding	-6.42599	5.86389	7.32173	22539	347	144	13	9.02778	2.38816	1649|3066|3148|3397|5092|6604|8091|8864|22927|23394|23462|23493|51176	DDIT3|HDAC2|HMGB2|ID1|PCBD1|SMARCD3|HMGA2|PER2|HABP4|ADNP|HEY1|HEY2|LEF1	-4.38571	HCV_related
Reactome Gene Sets	6	R-HSA-8940973	RUNX2 regulates osteoblast differentiation	-6.4172	32.6085	12.4233	22539	24	144	5	3.47222	1.52563	367|4094|23314|23462|23493	AR|MAF|SATB2|HEY1|HEY2	-4.37929	HCV_related
GO Biological Processes	19	GO:0048762	mesenchymal cell differentiation	-6.34219	8.15213	7.98067	22539	192	144	10	6.94444	2.1184	2146|3066|4092|6662|6943|6949|8091|23462|23493|51176	EZH2|HDAC2|SMAD7|SOX9|TCF21|TCOF1|HMGA2|HEY1|HEY2|LEF1	-4.31829	HCV_related
GO Biological Processes	19	GO:0061448	connective tissue development	-6.33306	7.11458	7.66858	22539	242	144	11	7.63889	2.21349	1958|3200|3202|4094|4613|6662|7227|8091|9971|10891|23314	EGR1|HOXA3|HOXA5|MAF|MYCN|SOX9|TRPS1|HMGA2|NR1H4|PPARGC1A|SATB2	-4.31145	HCV_related
GO Biological Processes	19	GO:0060541	respiratory system development	-6.32143	8.10989	7.95435	22539	193	144	10	6.94444	2.1184	2627|3202|3397|4613|6662|6943|7289|23414|51176|55636	GATA6|HOXA5|ID1|MYCN|SOX9|TCF21|TULP3|ZFPM2|LEF1|CHD7	-4.30211	HCV_related
GO Biological Processes	19	GO:0035601	protein deacylation	-6.29794	11.4878	8.80126	22539	109	144	8	5.55556	1.90885	3066|6299|8864|10284|23408|51317|51742|79885	HDAC2|SALL1|PER2|SAP18|SIRT5|PHF21A|ARID4B|HDAC11	-4.28292	HCV_related
GO Biological Processes	19	GO:0098732	macromolecule deacylation	-6.26748	11.3833	8.7537	22539	110	144	8	5.55556	1.90885	3066|6299|8864|10284|23408|51317|51742|79885	HDAC2|SALL1|PER2|SAP18|SIRT5|PHF21A|ARID4B|HDAC11	-4.25937	HCV_related
GO Biological Processes	19	GO:0030856	regulation of epithelial cell differentiation	-6.24881	9.32906	8.23455	22539	151	144	9	6.25	2.01718	2146|3204|3397|4613|4831|5991|6662|10626|23493	EZH2|HOXA7|ID1|MYCN|NME2|RFX3|SOX9|TRIM16|HEY2	-4.24512	HCV_related
GO Biological Processes	19	GO:2000677	regulation of transcription regulatory region DNA binding	-6.21993	19.5651	10.3247	22539	48	144	6	4.16667	1.66522	1649|3397|8091|8864|23462|23493	DDIT3|ID1|HMGA2|PER2|HEY1|HEY2	-4.21843	HCV_related
GO Biological Processes	19	GO:0001501	skeletal system development	-6.20628	4.7817	6.7937	22539	491	144	15	10.4167	2.54564	1750|2114|3200|3202|3204|4094|4613|6662|6949|7227|7289|8091|9968|23314|55636	DLX6|ETS2|HOXA3|HOXA5|HOXA7|MAF|MYCN|SOX9|TCOF1|TRPS1|TULP3|HMGA2|MED12|SATB2|CHD7	-4.21477	HCV_related
GO Biological Processes	19	GO:0071156	regulation of cell cycle arrest	-6.1779	11.0811	8.61461	22539	113	144	8	5.55556	1.90885	1820|2305|2627|4869|5934|8091|57472|79733	ARID3A|FOXM1|GATA6|NPM1|RBL2|HMGA2|CNOT6|E2F8	-4.19561	HCV_related
GO Biological Processes	19	GO:0007050	cell cycle arrest	-6.15915	6.83226	7.46577	22539	252	144	11	7.63889	2.21349	580|1649|1820|2305|2627|4869|5934|8091|10657|57472|79733	BARD1|DDIT3|ARID3A|FOXM1|GATA6|NPM1|RBL2|HMGA2|KHDRBS1|CNOT6|E2F8	-4.18308	HCV_related
GO Biological Processes	19	GO:0048729	tissue morphogenesis	-6.14499	4.17062	6.51457	22539	638	144	17	11.8056	2.68895	367|2099|3202|4092|4613|6299|6662|6943|7289|8091|9968|23414|23462|23493|51176|55636|64750	AR|ESR1|HOXA5|SMAD7|MYCN|SALL1|SOX9|TCF21|TULP3|HMGA2|MED12|ZFPM2|HEY1|HEY2|LEF1|CHD7|SMURF2	-4.17301	HCV_related
GO Biological Processes	19	GO:0009952	anterior/posterior pattern specification	-6.13999	7.74856	7.72569	22539	202	144	10	6.94444	2.1184	1649|2114|3200|3202|3204|7289|9968|22955|23493|51176	DDIT3|ETS2|HOXA3|HOXA5|HOXA7|TULP3|MED12|SCMH1|HEY2|LEF1	-4.17005	HCV_related
Reactome Gene Sets	6	R-HSA-176974	Unwinding of DNA	-6.11911	52.1736	14.2183	22539	12	144	4	2.77778	1.36946	4171|4172|4173|4176	MCM2|MCM3|MCM4|MCM7	-4.15522	HCV_related
GO Biological Processes	19	GO:0048511	rhythmic process	-6.08894	6.02003	7.1599	22539	312	144	12	8.33333	2.30321	687|1958|2099|2146|3066|3131|3397|6095|8864|9611|10891|23394	KLF9|EGR1|ESR1|EZH2|HDAC2|HLF|ID1|RORA|PER2|NCOR1|PPARGC1A|ADNP	-4.12903	HCV_related
GO Biological Processes	19	GO:0003205	cardiac chamber development	-6.08332	8.91574	8.00652	22539	158	144	9	6.25	2.01718	2627|4091|4092|6299|6604|23414|23462|23493|55636	GATA6|SMAD6|SMAD7|SALL1|SMARCD3|ZFPM2|HEY1|HEY2|CHD7	-4.12539	HCV_related
GO Biological Processes	19	GO:0046661	male sex differentiation	-6.06036	8.85967	7.9751	22539	159	144	9	6.25	2.01718	367|2099|2627|3148|6662|6943|23414|51742|83990	AR|ESR1|GATA6|HMGB2|SOX9|TCF21|ZFPM2|ARID4B|BRIP1	-4.10464	HCV_related
CORUM	33	CORUM:2792	MCM2-MCM4-MCM6-MCM7 complex	-5.99274	117.391	18.6673	22539	4	144	3	2.08333	1.19022	4171|4173|4176	MCM2|MCM4|MCM7	-4.053	HCV_related
GO Biological Processes	19	GO:0003231	cardiac ventricle development	-5.95144	10.3485	8.26797	22539	121	144	8	5.55556	1.90885	4091|4092|6299|6604|23414|23462|23493|55636	SMAD6|SMAD7|SALL1|SMARCD3|ZFPM2|HEY1|HEY2|CHD7	-4.02049	HCV_related
GO Biological Processes	19	GO:0032392	DNA geometric change	-5.94793	13.0434	8.86739	22539	84	144	7	4.86111	1.79211	1643|3148|3149|4171|4173|4176|83990	DDB2|HMGB2|HMGB3|MCM2|MCM4|MCM7|BRIP1	-4.02049	HCV_related
Canonical Pathways	11	M195	PID CMYB PATHWAY	-5.94793	13.0434	8.86739	22539	84	144	7	4.86111	1.79211	2114|4094|4173|6595|9611|10401|51176	ETS2|MAF|MCM4|SMARCA2|NCOR1|PIAS3|LEF1	-4.02049	HCV_related
GO Biological Processes	19	GO:0008406	gonad development	-5.91197	7.31406	7.44189	22539	214	144	10	6.94444	2.1184	367|2099|2627|3148|6299|6662|6943|23414|51742|83990	AR|ESR1|GATA6|HMGB2|SALL1|SOX9|TCF21|ZFPM2|ARID4B|BRIP1	-4.00078	HCV_related
GO Biological Processes	19	GO:0007423	sensory organ development	-5.90588	4.52372	6.51239	22539	519	144	15	10.4167	2.54564	1750|3066|4094|4171|4613|6297|6299|6597|6604|6662|7289|9935|23493|51176|55636	DLX6|HDAC2|MAF|MCM2|MYCN|SALL2|SALL1|SMARCA4|SMARCD3|SOX9|TULP3|MAFB|HEY2|LEF1|CHD7	-3.99646	HCV_related
GO Biological Processes	19	GO:0016575	histone deacetylation	-5.87835	12.7401	8.74674	22539	86	144	7	4.86111	1.79211	3066|6299|8864|10284|51317|51742|79885	HDAC2|SALL1|PER2|SAP18|PHF21A|ARID4B|HDAC11	-3.9742	HCV_related
GO Biological Processes	19	GO:0003206	cardiac chamber morphogenesis	-5.8708	10.0981	8.14623	22539	124	144	8	5.55556	1.90885	2627|4091|4092|6604|23414|23462|23493|55636	GATA6|SMAD6|SMAD7|SMARCD3|ZFPM2|HEY1|HEY2|CHD7	-3.96838	HCV_related
GO Biological Processes	19	GO:0000075	cell cycle checkpoint	-5.82127	7.14707	7.33004	22539	219	144	10	6.94444	2.1184	1820|4869|5934|7158|8091|9319|9735|57472|79733|83990	ARID3A|NPM1|RBL2|TP53BP1|HMGA2|TRIP13|KNTC1|CNOT6|E2F8|BRIP1	-3.92404	HCV_related
CORUM	33	CORUM:713	BRG1-SIN3A complex	-5.8176	44.7202	13.1213	22539	14	144	4	2.77778	1.36946	3066|6597|6599|6604	HDAC2|SMARCA4|SMARCC1|SMARCD3	-3.92208	HCV_related
GO Biological Processes	19	GO:0071158	positive regulation of cell cycle arrest	-5.81054	12.4505	8.63003	22539	88	144	7	4.86111	1.79211	1820|2627|4869|5934|8091|57472|79733	ARID3A|GATA6|NPM1|RBL2|HMGA2|CNOT6|E2F8	-3.91843	HCV_related
GO Biological Processes	19	GO:0060537	muscle tissue development	-5.80781	5.16439	6.68691	22539	394	144	13	9.02778	2.38816	1958|2353|2627|3131|4092|6662|6943|9328|10891|23414|23493|51176|55636	EGR1|FOS|GATA6|HLF|SMAD7|SOX9|TCF21|GTF3C5|PPARGC1A|ZFPM2|HEY2|LEF1|CHD7	-3.91738	HCV_related
GO Biological Processes	19	GO:0045604	regulation of epidermal cell differentiation	-5.72442	16.1918	9.28922	22539	58	144	6	4.16667	1.66522	2146|3204|4613|4831|10626|23493	EZH2|HOXA7|MYCN|NME2|TRIM16|HEY2	-3.84236	HCV_related
CORUM	33	CORUM:714	BRM-SIN3A complex	-5.68507	41.7389	12.656	22539	15	144	4	2.77778	1.36946	3066|6595|6599|6604	HDAC2|SMARCA2|SMARCC1|SMARCD3	-3.80959	HCV_related
GO Biological Processes	19	GO:0048704	embryonic skeletal system morphogenesis	-5.64822	11.7811	8.35411	22539	93	144	7	4.86111	1.79211	3200|3202|3204|4613|7289|9968|23314	HOXA3|HOXA5|HOXA7|MYCN|TULP3|MED12|SATB2	-3.78083	HCV_related
GO Biological Processes	19	GO:0030518	intracellular steroid hormone receptor signaling pathway	-5.52137	9.07367	7.62852	22539	138	144	8	5.55556	1.90885	367|2099|6047|6597|6943|9968|9970|10891	AR|ESR1|RNF4|SMARCA4|TCF21|MED12|NR1I3|PPARGC1A	-3.66818	HCV_related
GO Biological Processes	19	GO:0048732	gland development	-5.48045	4.82173	6.35502	22539	422	144	13	9.02778	2.38816	367|2099|2146|2627|3200|3202|6299|6599|6662|6943|9935|51176|79733	AR|ESR1|EZH2|GATA6|HOXA3|HOXA5|SALL1|SMARCC1|SOX9|TCF21|MAFB|LEF1|E2F8	-3.63646	HCV_related
GO Biological Processes	19	GO:0048514	blood vessel morphogenesis	-5.45306	3.91302	5.99494	22539	640	144	16	11.1111	2.61891	2627|3200|3202|3204|3397|4092|4854|6095|6943|8091|23414|23462|23493|51176|55636|79733	GATA6|HOXA3|HOXA5|HOXA7|ID1|SMAD7|NOTCH3|RORA|TCF21|HMGA2|ZFPM2|HEY1|HEY2|LEF1|CHD7|E2F8	-3.61416	HCV_related
GO Biological Processes	19	GO:0051091	positive regulation of DNA binding transcription factor activity	-5.41698	6.44119	6.83828	22539	243	144	10	6.94444	2.1184	367|1649|2099|4869|6597|6929|7158|10346|10891|22954	AR|DDIT3|ESR1|NPM1|SMARCA4|TCF3|TP53BP1|TRIM22|PPARGC1A|TRIM32	-3.58052	HCV_related
GO Biological Processes	19	GO:0065004	protein-DNA complex assembly	-5.40116	6.41479	6.81924	22539	244	144	10	6.94444	2.1184	1602|1643|2099|3148|4171|4869|6047|6662|6666|23493	DACH1|DDB2|ESR1|HMGB2|MCM2|NPM1|RNF4|SOX9|SOX12|HEY2	-3.56767	HCV_related
Canonical Pathways	11	M101	PID HDAC CLASSI PATHWAY	-5.39145	14.2292	8.63053	22539	66	144	6	4.16667	1.66522	3066|4092|9611|10284|23408|79885	HDAC2|SMAD7|NCOR1|SAP18|SIRT5|HDAC11	-3.55944	HCV_related
GO Biological Processes	19	GO:0043433	negative regulation of DNA binding transcription factor activity	-5.38366	8.6956	7.42868	22539	144	144	8	5.55556	1.90885	1649|2099|2146|3066|3397|4092|8431|9971	DDIT3|ESR1|EZH2|HDAC2|ID1|SMAD7|NR0B2|NR1H4	-3.55451	HCV_related
Reactome Gene Sets	6	R-HSA-8939243	RUNX1 interacts with co-factors whose precise effect on RUNX1 targets is not known	-5.37622	20.5948	9.69385	22539	38	144	5	3.47222	1.52563	6595|6597|6599|6604|22955	SMARCA2|SMARCA4|SMARCC1|SMARCD3|SCMH1	-3.54978	HCV_related
GO Biological Processes	19	GO:0003281	ventricular septum development	-5.35298	14.0168	8.55626	22539	67	144	6	4.16667	1.66522	4091|4092|6299|23414|23462|23493	SMAD6|SMAD7|SALL1|ZFPM2|HEY1|HEY2	-3.5355	HCV_related
GO Biological Processes	19	GO:0035107	appendage morphogenesis	-5.29541	8.46059	7.30181	22539	148	144	8	5.55556	1.90885	1750|3066|4613|6299|6662|7289|51176|55636	DLX6|HDAC2|MYCN|SALL1|SOX9|TULP3|LEF1|CHD7	-3.48781	HCV_related
GO Biological Processes	19	GO:0035108	limb morphogenesis	-5.29541	8.46059	7.30181	22539	148	144	8	5.55556	1.90885	1750|3066|4613|6299|6662|7289|51176|55636	DLX6|HDAC2|MYCN|SALL1|SOX9|TULP3|LEF1|CHD7	-3.48781	HCV_related
GO Biological Processes	19	GO:0045165	cell fate commitment	-5.24697	6.16224	6.63456	22539	254	144	10	6.94444	2.1184	367|2114|2627|4854|6095|6662|6666|6929|23314|23493	AR|ETS2|GATA6|NOTCH3|RORA|SOX9|SOX12|TCF3|SATB2|HEY2	-3.44904	HCV_related
GO Biological Processes	19	GO:0010564	regulation of cell cycle process	-5.23854	3.57162	5.72373	22539	745	144	17	11.8056	2.68895	1602|1820|2146|2305|2627|4869|5934|6047|6604|6662|8091|9232|9319|9700|9735|57472|79733	DACH1|ARID3A|EZH2|FOXM1|GATA6|NPM1|RBL2|RNF4|SMARCD3|SOX9|HMGA2|PTTG1|TRIP13|ESPL1|KNTC1|CNOT6|E2F8	-3.44468	HCV_related
GO Biological Processes	19	GO:0048754	branching morphogenesis of an epithelial tube	-5.20982	8.23794	7.17963	22539	152	144	8	5.55556	1.90885	367|2099|3202|4613|6299|6662|6943|51176	AR|ESR1|HOXA5|MYCN|SALL1|SOX9|TCF21|LEF1	-3.42134	HCV_related
GO Biological Processes	19	GO:0001655	urogenital system development	-5.19607	5.43132	6.3714	22539	317	144	11	7.63889	2.21349	367|1958|2099|4091|4092|4854|6299|6599|6662|6940|6943	AR|EGR1|ESR1|SMAD6|SMAD7|NOTCH3|SALL1|SMARCC1|SOX9|ZNF354A|TCF21	-3.41159	HCV_related
GO Biological Processes	19	GO:0000077	DNA damage checkpoint	-5.16797	8.13095	7.12021	22539	154	144	8	5.55556	1.90885	1820|4869|5934|7158|8091|57472|79733|83990	ARID3A|NPM1|RBL2|TP53BP1|HMGA2|CNOT6|E2F8|BRIP1	-3.39396	HCV_related
GO Biological Processes	19	GO:0043583	ear development	-5.118	6.80525	6.72831	22539	207	144	9	6.25	2.01718	1750|4094|4171|4613|6299|6662|9935|23493|55636	DLX6|MAF|MCM2|MYCN|SALL1|SOX9|MAFB|HEY2|CHD7	-3.35167	HCV_related
GO Biological Processes	19	GO:0003208	cardiac ventricle morphogenesis	-5.10026	12.6909	8.07743	22539	74	144	6	4.16667	1.66522	4092|6604|23414|23462|23493|55636	SMAD7|SMARCD3|ZFPM2|HEY1|HEY2|CHD7	-3.3352	HCV_related
CORUM	33	CORUM:1106	TFIIIC containing-TOP1-SUB1 complex	-5.05686	67.0804	14.0212	22539	7	144	3	2.08333	1.19022	9328|9329|10923	GTF3C5|GTF3C4|SUB1	-3.30104	HCV_related
GO Biological Processes	19	GO:0003215	cardiac right ventricle morphogenesis	-5.05609	29.8135	10.5926	22539	21	144	4	2.77778	1.36946	6604|23414|23493|55636	SMARCD3|ZFPM2|HEY2|CHD7	-3.30104	HCV_related
GO Biological Processes	19	GO:0018394	peptidyl-lysine acetylation	-5.02626	7.77743	6.9204	22539	161	144	8	5.55556	1.90885	1810|3066|8464|9329|10626|10891|51176|55689	DR1|HDAC2|SUPT3H|GTF3C4|TRIM16|PPARGC1A|LEF1|YEATS2	-3.27736	HCV_related
GO Biological Processes	19	GO:0031570	DNA integrity checkpoint	-4.98706	7.682	6.86551	22539	163	144	8	5.55556	1.90885	1820|4869|5934|7158|8091|57472|79733|83990	ARID3A|NPM1|RBL2|TP53BP1|HMGA2|CNOT6|E2F8|BRIP1	-3.24718	HCV_related
GO Biological Processes	19	GO:0072331	signal transduction by p53 class mediator	-4.97282	5.73336	6.30948	22539	273	144	10	6.94444	2.1184	580|1820|2305|3066|4869|5934|10614|57472|79733|83990	BARD1|ARID3A|FOXM1|HDAC2|NPM1|RBL2|HEXIM1|CNOT6|E2F8|BRIP1	-3.23831	HCV_related
GO Biological Processes	19	GO:0000082	G1/S transition of mitotic cell cycle	-4.97282	5.73336	6.30948	22539	273	144	10	6.94444	2.1184	1820|2146|4171|4172|4173|4176|4869|5934|57472|79733	ARID3A|EZH2|MCM2|MCM3|MCM4|MCM7|NPM1|RBL2|CNOT6|E2F8	-3.23831	HCV_related
GO Biological Processes	19	GO:0007093	mitotic cell cycle checkpoint	-4.94841	7.58889	6.81155	22539	165	144	8	5.55556	1.90885	1820|4869|5934|8091|9319|9735|57472|79733	ARID3A|NPM1|RBL2|HMGA2|TRIP13|KNTC1|CNOT6|E2F8	-3.21742	HCV_related
Reactome Gene Sets	6	R-HSA-1989781	PPARA activates gene expression	-4.93635	9.20711	7.19796	22539	119	144	7	4.86111	1.79211	6095|6604|9611|9915|9968|9971|10891	RORA|SMARCD3|NCOR1|ARNT2|MED12|NR1H4|PPARGC1A	-3.21003	HCV_related
GO Biological Processes	19	GO:0030111	regulation of Wnt signaling pathway	-4.92233	5.07885	6.0677	22539	339	144	11	7.63889	2.21349	1649|1958|2099|6299|6597|6662|8629|9968|10042|51176|64750	DDIT3|EGR1|ESR1|SALL1|SMARCA4|SOX9|JRK|MED12|HMGXB4|LEF1|SMURF2	-3.19946	HCV_related
Reactome Gene Sets	6	R-HSA-1368108	BMAL1:CLOCK,NPAS2 activates circadian gene expression	-4.91113	16.6512	8.6128	22539	47	144	5	3.47222	1.52563	6095|6604|8864|9611|10891	RORA|SMARCD3|PER2|NCOR1|PPARGC1A	-3.19623	HCV_related
Reactome Gene Sets	6	R-HSA-2122947	NOTCH1 Intracellular Domain Regulates Transcription	-4.91113	16.6512	8.6128	22539	47	144	5	3.47222	1.52563	3066|9611|23462|23493|79885	HDAC2|NCOR1|HEY1|HEY2|HDAC11	-3.19623	HCV_related
GO Biological Processes	19	GO:0045682	regulation of epidermis development	-4.90382	11.7391	7.71578	22539	80	144	6	4.16667	1.66522	2146|3204|4613|4831|10626|23493	EZH2|HOXA7|MYCN|NME2|TRIM16|HEY2	-3.19117	HCV_related
GO Biological Processes	19	GO:1901699	cellular response to nitrogen compound	-4.8975	3.73261	5.57372	22539	629	144	15	10.4167	2.54564	1788|1958|2099|2146|3066|3397|4613|4869|6599|6662|9611|9971|10891|79753|83990	DNMT3A|EGR1|ESR1|EZH2|HDAC2|ID1|MYCN|NPM1|SMARCC1|SOX9|NCOR1|NR1H4|PPARGC1A|SNIP1|BRIP1	-3.18709	HCV_related
Reactome Gene Sets	6	R-HSA-400206	Regulation of lipid metabolism by Peroxisome proliferator-activated receptor alpha (PPARalpha)	-4.86561	8.9807	7.08754	22539	122	144	7	4.86111	1.79211	6095|6604|9611|9915|9968|9971|10891	RORA|SMARCD3|NCOR1|ARNT2|MED12|NR1H4|PPARGC1A	-3.16458	HCV_related
GO Biological Processes	19	GO:0006268	DNA unwinding involved in DNA replication	-4.85478	58.6953	13.0876	22539	8	144	3	2.08333	1.19022	4171|4173|4176	MCM2|MCM4|MCM7	-3.15686	HCV_related
GO Biological Processes	19	GO:0071772	response to BMP	-4.85407	7.36569	6.68051	22539	170	144	8	5.55556	1.90885	1958|2627|3397|4091|4092|6662|51176|64750	EGR1|GATA6|ID1|SMAD6|SMAD7|SOX9|LEF1|SMURF2	-3.15686	HCV_related
GO Biological Processes	19	GO:0071773	cellular response to BMP stimulus	-4.85407	7.36569	6.68051	22539	170	144	8	5.55556	1.90885	1958|2627|3397|4091|4092|6662|51176|64750	EGR1|GATA6|ID1|SMAD6|SMAD7|SOX9|LEF1|SMURF2	-3.15686	HCV_related
GO Biological Processes	19	GO:0048706	embryonic skeletal system development	-4.84247	8.90769	7.05158	22539	123	144	7	4.86111	1.79211	3200|3202|3204|4613|7289|9968|23314	HOXA3|HOXA5|HOXA7|MYCN|TULP3|MED12|SATB2	-3.14796	HCV_related
Canonical Pathways	11	M115	PID REG GR PATHWAY	-4.84194	11.4527	7.6037	22539	82	144	6	4.16667	1.66522	1958|2353|3066|6597|6599|9970	EGR1|FOS|HDAC2|SMARCA4|SMARCC1|NR1I3	-3.14796	HCV_related
GO Biological Processes	19	GO:0030323	respiratory tube development	-4.83559	7.32261	6.65494	22539	171	144	8	5.55556	1.90885	2627|3202|3397|4613|6662|6943|7289|23414	GATA6|HOXA5|ID1|MYCN|SOX9|TCF21|TULP3|ZFPM2	-3.14376	HCV_related
Reactome Gene Sets	6	R-HSA-6791312	TP53 Regulates Transcription of Cell Cycle Genes	-4.82106	15.9715	8.41264	22539	49	144	5	3.47222	1.52563	1820|4869|5934|57472|79733	ARID3A|NPM1|RBL2|CNOT6|E2F8	-3.13137	HCV_related
Reactome Gene Sets	6	R-HSA-1640170	Cell Cycle	-4.79343	3.65703	5.4769	22539	642	144	15	10.4167	2.54564	580|1875|2305|4171|4172|4173|4176|4605|4869|5934|7158|9232|9700|9735|83990	BARD1|E2F5|FOXM1|MCM2|MCM3|MCM4|MCM7|MYBL2|NPM1|RBL2|TP53BP1|PTTG1|ESPL1|KNTC1|BRIP1	-3.11112	HCV_related
GO Biological Processes	19	GO:0060173	limb development	-4.76287	7.15524	6.5547	22539	175	144	8	5.55556	1.90885	1750|3066|4613|6299|6662|7289|51176|55636	DLX6|HDAC2|MYCN|SALL1|SOX9|TULP3|LEF1|CHD7	-3.08783	HCV_related
GO Biological Processes	19	GO:0048736	appendage development	-4.76287	7.15524	6.5547	22539	175	144	8	5.55556	1.90885	1750|3066|4613|6299|6662|7289|51176|55636	DLX6|HDAC2|MYCN|SALL1|SOX9|TULP3|LEF1|CHD7	-3.08783	HCV_related
GO Biological Processes	19	GO:0035113	embryonic appendage morphogenesis	-4.75197	8.62713	6.91172	22539	127	144	7	4.86111	1.79211	1750|3066|4613|6299|7289|51176|55636	DLX6|HDAC2|MYCN|SALL1|TULP3|LEF1|CHD7	-3.08306	HCV_related
GO Biological Processes	19	GO:0030326	embryonic limb morphogenesis	-4.75197	8.62713	6.91172	22539	127	144	7	4.86111	1.79211	1750|3066|4613|6299|7289|51176|55636	DLX6|HDAC2|MYCN|SALL1|TULP3|LEF1|CHD7	-3.08306	HCV_related
GO Biological Processes	19	GO:0044843	cell cycle G1/S phase transition	-4.72046	5.3603	6.01362	22539	292	144	10	6.94444	2.1184	1820|2146|4171|4172|4173|4176|4869|5934|57472|79733	ARID3A|EZH2|MCM2|MCM3|MCM4|MCM7|NPM1|RBL2|CNOT6|E2F8	-3.05458	HCV_related
GO Biological Processes	19	GO:0071103	DNA conformation change	-4.70772	5.34201	5.99877	22539	293	144	10	6.94444	2.1184	1643|3148|3149|4171|4173|4176|4869|6662|8091|83990	DDB2|HMGB2|HMGB3|MCM2|MCM4|MCM7|NPM1|SOX9|HMGA2|BRIP1	-3.04486	HCV_related
CORUM	33	CORUM:738	SIN3-ING1b complex I	-4.68073	52.1736	12.3126	22539	9	144	3	2.08333	1.19022	3066|10284|51742	HDAC2|SAP18|ARID4B	-3.02946	HCV_related
CORUM	33	CORUM:1237	BAF complex	-4.68073	52.1736	12.3126	22539	9	144	3	2.08333	1.19022	6595|6597|6599	SMARCA2|SMARCA4|SMARCC1	-3.02946	HCV_related
GO Biological Processes	19	GO:0042692	muscle cell differentiation	-4.6473	4.74306	5.76503	22539	363	144	11	7.63889	2.21349	2146|2627|6095|6604|6662|6929|22954|23462|23493|50804|51176	EZH2|GATA6|RORA|SMARCD3|SOX9|TCF3|TRIM32|HEY1|HEY2|MYEF2|LEF1	-3.00304	HCV_related
GO Biological Processes	19	GO:0048839	inner ear development	-4.64012	6.88004	6.38664	22539	182	144	8	5.55556	1.90885	1750|4094|4171|4613|6662|9935|23493|55636	DLX6|MAF|MCM2|MYCN|SOX9|MAFB|HEY2|CHD7	-2.99682	HCV_related
GO Biological Processes	19	GO:0045596	negative regulation of cell differentiation	-4.62348	3.53586	5.31862	22539	664	144	15	10.4167	2.54564	1649|2146|3066|3149|3202|3204|3397|4092|4613|4854|6095|6662|9935|23414|23493	DDIT3|EZH2|HDAC2|HMGB3|HOXA5|HOXA7|ID1|SMAD7|MYCN|NOTCH3|RORA|SOX9|MAFB|ZFPM2|HEY2	-2.98209	HCV_related
GO Biological Processes	19	GO:0060840	artery development	-4.61016	10.4347	7.19143	22539	90	144	6	4.16667	1.66522	4091|4092|4854|23462|23493|55636	SMAD6|SMAD7|NOTCH3|HEY1|HEY2|CHD7	-2.9713	HCV_related
GO Biological Processes	19	GO:0003007	heart morphogenesis	-4.60633	5.86953	6.08154	22539	240	144	9	6.25	2.01718	2627|4091|4092|6604|6662|23414|23462|23493|55636	GATA6|SMAD6|SMAD7|SMARCD3|SOX9|ZFPM2|HEY1|HEY2|CHD7	-2.97033	HCV_related
GO Biological Processes	19	GO:0061138	morphogenesis of a branching epithelium	-4.60604	6.80525	6.34025	22539	184	144	8	5.55556	1.90885	367|2099|3202|4613|6299|6662|6943|51176	AR|ESR1|HOXA5|MYCN|SALL1|SOX9|TCF21|LEF1	-2.97033	HCV_related
GO Biological Processes	19	GO:0051216	cartilage development	-4.60604	6.80525	6.34025	22539	184	144	8	5.55556	1.90885	3200|3202|4094|4613|6662|7227|8091|23314	HOXA3|HOXA5|MAF|MYCN|SOX9|TRPS1|HMGA2|SATB2	-2.97033	HCV_related
Reactome Gene Sets	6	R-HSA-1368082	RORA activates gene expression	-4.60181	23.1883	9.25043	22539	27	144	4	2.77778	1.36946	6095|6604|9611|10891	RORA|SMARCD3|NCOR1|PPARGC1A	-2.96798	HCV_related
GO Biological Processes	19	GO:0060260	regulation of transcription initiation from RNA polymerase II promoter	-4.53702	22.3601	9.06878	22539	28	144	4	2.77778	1.36946	2099|3394|10923|23493	ESR1|IRF8|SUB1|HEY2	-2.91153	HCV_related
CORUM	33	CORUM:1257	ALL-1 supercomplex	-4.53702	22.3601	9.06878	22539	28	144	4	2.77778	1.36946	3066|6595|6599|10284	HDAC2|SMARCA2|SMARCC1|SAP18	-2.91153	HCV_related
GO Biological Processes	19	GO:0014888	striated muscle adaptation	-4.53493	13.9751	7.79543	22539	56	144	5	3.47222	1.52563	2146|2627|9569|10891|23493	EZH2|GATA6|GTF2IRD1|PPARGC1A|HEY2	-2.91035	HCV_related
CORUM	33	CORUM:238	SWI-SNF chromatin remodeling-related-BRCA1 complex	-4.52787	46.9562	11.6557	22539	10	144	3	2.08333	1.19022	6595|6597|6599	SMARCA2|SMARCA4|SMARCC1	-2.90784	HCV_related
CORUM	33	CORUM:1413	NCOR1 complex	-4.52787	46.9562	11.6557	22539	10	144	3	2.08333	1.19022	6597|6599|9611	SMARCA4|SMARCC1|NCOR1	-2.90784	HCV_related
CORUM	33	CORUM:743	SIN3-SAP25 complex	-4.52787	46.9562	11.6557	22539	10	144	3	2.08333	1.19022	3066|10284|51742	HDAC2|SAP18|ARID4B	-2.90784	HCV_related
CORUM	33	CORUM:691	SIN3-SAP25 complex	-4.52787	46.9562	11.6557	22539	10	144	3	2.08333	1.19022	3066|10284|51742	HDAC2|SAP18|ARID4B	-2.90784	HCV_related
GO Biological Processes	19	GO:0006473	protein acetylation	-4.52271	6.62522	6.22723	22539	189	144	8	5.55556	1.90885	1810|3066|8464|9329|10626|10891|51176|55689	DR1|HDAC2|SUPT3H|GTF3C4|TRIM16|PPARGC1A|LEF1|YEATS2	-2.90359	HCV_related
GO Biological Processes	19	GO:0014706	striated muscle tissue development	-4.49697	4.56692	5.60045	22539	377	144	11	7.63889	2.21349	1958|2353|2627|3131|4092|6943|9328|23414|23493|51176|55636	EGR1|FOS|GATA6|HLF|SMAD7|TCF21|GTF3C5|ZFPM2|HEY2|LEF1|CHD7	-2.8877	HCV_related
GO Biological Processes	19	GO:0009303	rRNA transcription	-4.47472	21.5891	8.89634	22539	29	144	4	2.77778	1.36946	6597|9328|9329|64425	SMARCA4|GTF3C5|GTF3C4|POLR1E	-2.87189	HCV_related
GO Biological Processes	19	GO:0006333	chromatin assembly or disassembly	-4.47392	6.5217	6.16137	22539	192	144	8	5.55556	1.90885	3148|4171|4869|6597|6599|6604|6662|8091	HMGB2|MCM2|NPM1|SMARCA4|SMARCC1|SMARCD3|SOX9|HMGA2	-2.87189	HCV_related
GO Biological Processes	19	GO:0001816	cytokine production	-4.46809	3.42746	5.17364	22539	685	144	15	10.4167	2.54564	1649|1958|1997|2627|3066|3148|3394|4092|4094|6095|9971|10623|10626|22954|51176	DDIT3|EGR1|ELF1|GATA6|HDAC2|HMGB2|IRF8|SMAD7|MAF|RORA|NR1H4|POLR3C|TRIM16|TRIM32|LEF1	-2.87189	HCV_related
Reactome Gene Sets	6	R-HSA-2894858	Signaling by NOTCH1 HD+PEST Domain Mutants in Cancer	-4.46036	13.4932	7.6391	22539	58	144	5	3.47222	1.52563	3066|9611|23462|23493|79885	HDAC2|NCOR1|HEY1|HEY2|HDAC11	-2.87181	HCV_related
Reactome Gene Sets	6	R-HSA-2644606	Constitutive Signaling by NOTCH1 PEST Domain Mutants	-4.46036	13.4932	7.6391	22539	58	144	5	3.47222	1.52563	3066|9611|23462|23493|79885	HDAC2|NCOR1|HEY1|HEY2|HDAC11	-2.87181	HCV_related
Reactome Gene Sets	6	R-HSA-2644602	Signaling by NOTCH1 PEST Domain Mutants in Cancer	-4.46036	13.4932	7.6391	22539	58	144	5	3.47222	1.52563	3066|9611|23462|23493|79885	HDAC2|NCOR1|HEY1|HEY2|HDAC11	-2.87181	HCV_related
Reactome Gene Sets	6	R-HSA-2644603	Signaling by NOTCH1 in Cancer	-4.46036	13.4932	7.6391	22539	58	144	5	3.47222	1.52563	3066|9611|23462|23493|79885	HDAC2|NCOR1|HEY1|HEY2|HDAC11	-2.87181	HCV_related
Reactome Gene Sets	6	R-HSA-2894862	Constitutive Signaling by NOTCH1 HD+PEST Domain Mutants	-4.46036	13.4932	7.6391	22539	58	144	5	3.47222	1.52563	3066|9611|23462|23493|79885	HDAC2|NCOR1|HEY1|HEY2|HDAC11	-2.87181	HCV_related
GO Biological Processes	19	GO:0007623	circadian rhythm	-4.44189	6.45447	6.11824	22539	194	144	8	5.55556	1.90885	687|2146|3066|3397|6095|8864|9611|10891	KLF9|EZH2|HDAC2|ID1|RORA|PER2|NCOR1|PPARGC1A	-2.85503	HCV_related
GO Biological Processes	19	GO:0060562	epithelial tube morphogenesis	-4.42855	4.95319	5.67484	22539	316	144	10	6.94444	2.1184	367|2099|3202|4613|6299|6662|6943|7289|9968|51176	AR|ESR1|HOXA5|MYCN|SALL1|SOX9|TCF21|TULP3|MED12|LEF1	-2.84503	HCV_related
GO Biological Processes	19	GO:0045930	negative regulation of mitotic cell cycle	-4.42855	4.95319	5.67484	22539	316	144	10	6.94444	2.1184	1820|2146|4869|5934|8091|9232|9319|9735|57472|79733	ARID3A|EZH2|NPM1|RBL2|HMGA2|PTTG1|TRIP13|KNTC1|CNOT6|E2F8	-2.84503	HCV_related
GO Biological Processes	19	GO:0001763	morphogenesis of a branching structure	-4.39456	6.35618	6.05467	22539	197	144	8	5.55556	1.90885	367|2099|3202|4613|6299|6662|6943|51176	AR|ESR1|HOXA5|MYCN|SALL1|SOX9|TCF21|LEF1	-2.8193	HCV_related
GO Biological Processes	19	GO:0060433	bronchus development	-4.3916	42.6875	11.0893	22539	11	144	3	2.08333	1.19022	3202|6662|7289	HOXA5|SOX9|TULP3	-2.81879	HCV_related
CORUM	33	CORUM:803	BRG1-SIN3A-HDAC containing SWI/SNF remodeling complex I	-4.3916	42.6875	11.0893	22539	11	144	3	2.08333	1.19022	3066|6597|6599	HDAC2|SMARCA4|SMARCC1	-2.81879	HCV_related
GO Biological Processes	19	GO:0007507	heart development	-4.38205	3.79621	5.25382	22539	536	144	13	9.02778	2.38816	2627|3397|4091|4092|6299|6604|6662|9968|10614|23414|23462|23493|55636	GATA6|ID1|SMAD6|SMAD7|SALL1|SMARCD3|SOX9|MED12|HEXIM1|ZFPM2|HEY1|HEY2|CHD7	-2.81167	HCV_related
GO Biological Processes	19	GO:0001817	regulation of cytokine production	-4.34414	3.53434	5.13114	22539	620	144	14	9.72222	2.46883	1649|1958|1997|2627|3066|3148|3394|4092|6095|9971|10623|10626|22954|51176	DDIT3|EGR1|ELF1|GATA6|HDAC2|HMGB2|IRF8|SMAD7|RORA|NR1H4|POLR3C|TRIM16|TRIM32|LEF1	-2.77939	HCV_related
Reactome Gene Sets	6	R-HSA-453279	Mitotic G1-G1/S phases	-4.34331	7.45337	6.29452	22539	147	144	7	4.86111	1.79211	1875|4171|4172|4173|4176|4605|5934	E2F5|MCM2|MCM3|MCM4|MCM7|MYBL2|RBL2	-2.77935	HCV_related
GO Biological Processes	19	GO:0006977	DNA damage response, signal transduction by p53 class mediator resulting in cell cycle arrest	-4.31935	12.6226	7.34844	22539	62	144	5	3.47222	1.52563	1820|4869|5934|57472|79733	ARID3A|NPM1|RBL2|CNOT6|E2F8	-2.76014	HCV_related
GO Biological Processes	19	GO:0007517	muscle organ development	-4.31358	4.35881	5.40031	22539	395	144	11	7.63889	2.21349	1958|2353|2627|3131|4092|6943|9328|23414|23493|51176|55636	EGR1|FOS|GATA6|HLF|SMAD7|TCF21|GTF3C5|ZFPM2|HEY2|LEF1|CHD7	-2.75594	HCV_related
GO Biological Processes	19	GO:0016573	histone acetylation	-4.30597	7.35333	6.23923	22539	149	144	7	4.86111	1.79211	1810|8464|9329|10626|10891|51176|55689	DR1|SUPT3H|GTF3C4|TRIM16|PPARGC1A|LEF1|YEATS2	-2.7499	HCV_related
Reactome Gene Sets	6	R-HSA-69190	DNA strand elongation	-4.30104	19.5651	8.42708	22539	32	144	4	2.77778	1.36946	4171|4172|4173|4176	MCM2|MCM3|MCM4|MCM7	-2.74732	HCV_related
Reactome Gene Sets	6	R-HSA-68962	Activation of the pre-replicative complex	-4.30104	19.5651	8.42708	22539	32	144	4	2.77778	1.36946	4171|4172|4173|4176	MCM2|MCM3|MCM4|MCM7	-2.74732	HCV_related
GO Biological Processes	19	GO:1902400	intracellular signal transduction involved in G1 DNA damage checkpoint	-4.28566	12.4223	7.27993	22539	63	144	5	3.47222	1.52563	1820|4869|5934|57472|79733	ARID3A|NPM1|RBL2|CNOT6|E2F8	-2.73581	HCV_related
GO Biological Processes	19	GO:0043966	histone H3 acetylation	-4.28566	12.4223	7.27993	22539	63	144	5	3.47222	1.52563	1810|8464|10626|51176|55689	DR1|SUPT3H|TRIM16|LEF1|YEATS2	-2.73581	HCV_related
GO Biological Processes	19	GO:0072431	signal transduction involved in mitotic G1 DNA damage checkpoint	-4.28566	12.4223	7.27993	22539	63	144	5	3.47222	1.52563	1820|4869|5934|57472|79733	ARID3A|NPM1|RBL2|CNOT6|E2F8	-2.73581	HCV_related
GO Biological Processes	19	GO:0060736	prostate gland growth	-4.2687	39.1302	10.5943	22539	12	144	3	2.08333	1.19022	367|2099|6662	AR|ESR1|SOX9	-2.72574	HCV_related
CORUM	33	CORUM:806	BRM-SIN3A-HDAC complex	-4.2687	39.1302	10.5943	22539	12	144	3	2.08333	1.19022	3066|6595|6599	HDAC2|SMARCA2|SMARCC1	-2.72574	HCV_related
GO Biological Processes	19	GO:0003184	pulmonary valve morphogenesis	-4.2687	39.1302	10.5943	22539	12	144	3	2.08333	1.19022	4091|23462|23493	SMAD6|HEY1|HEY2	-2.72574	HCV_related
GO Biological Processes	19	GO:0003177	pulmonary valve development	-4.2687	39.1302	10.5943	22539	12	144	3	2.08333	1.19022	4091|23462|23493	SMAD6|HEY1|HEY2	-2.72574	HCV_related
GO Biological Processes	19	GO:1902402	signal transduction involved in mitotic DNA damage checkpoint	-4.22001	12.0401	7.14746	22539	65	144	5	3.47222	1.52563	1820|4869|5934|57472|79733	ARID3A|NPM1|RBL2|CNOT6|E2F8	-2.68977	HCV_related
GO Biological Processes	19	GO:1902403	signal transduction involved in mitotic DNA integrity checkpoint	-4.22001	12.0401	7.14746	22539	65	144	5	3.47222	1.52563	1820|4869|5934|57472|79733	ARID3A|NPM1|RBL2|CNOT6|E2F8	-2.68977	HCV_related
GO Biological Processes	19	GO:0072413	signal transduction involved in mitotic cell cycle checkpoint	-4.22001	12.0401	7.14746	22539	65	144	5	3.47222	1.52563	1820|4869|5934|57472|79733	ARID3A|NPM1|RBL2|CNOT6|E2F8	-2.68977	HCV_related
GO Biological Processes	19	GO:0018393	internal peptidyl-lysine acetylation	-4.21507	7.11458	6.10537	22539	154	144	7	4.86111	1.79211	1810|8464|9329|10626|10891|51176|55689	DR1|SUPT3H|GTF3C4|TRIM16|PPARGC1A|LEF1|YEATS2	-2.68603	HCV_related
GO Biological Processes	19	GO:0048705	skeletal system morphogenesis	-4.21333	5.99123	5.81299	22539	209	144	8	5.55556	1.90885	3200|3202|3204|4613|6662|7289|9968|23314	HOXA3|HOXA5|HOXA7|MYCN|SOX9|TULP3|MED12|SATB2	-2.68603	HCV_related
GO Biological Processes	19	GO:0044773	mitotic DNA damage checkpoint	-4.20874	8.85967	6.50395	22539	106	144	6	4.16667	1.66522	1820|4869|5934|8091|57472|79733	ARID3A|NPM1|RBL2|HMGA2|CNOT6|E2F8	-2.68363	HCV_related
GO Biological Processes	19	GO:0002521	leukocyte differentiation	-4.20725	3.91302	5.17291	22539	480	144	12	8.33333	2.30321	863|1958|2353|3149|3204|4092|6095|6929|9935|10456|51176|55636	CBFA2T3|EGR1|FOS|HMGB3|HOXA7|SMAD7|RORA|TCF3|MAFB|HAX1|LEF1|CHD7	-2.68287	HCV_related
GO Biological Processes	19	GO:1902893	regulation of pri-miRNA transcription by RNA polymerase II	-4.19488	18.4142	8.1483	22539	34	144	4	2.77778	1.36946	2353|4091|6597|6662	FOS|SMAD6|SMARCA4|SOX9	-2.67484	HCV_related
GO Biological Processes	19	GO:0051145	smooth muscle cell differentiation	-4.18802	11.8576	7.08338	22539	66	144	5	3.47222	1.52563	2627|6604|6662|23462|23493	GATA6|SMARCD3|SOX9|HEY1|HEY2	-2.67157	HCV_related
GO Biological Processes	19	GO:0071359	cellular response to dsRNA	-4.18802	11.8576	7.08338	22539	66	144	5	3.47222	1.52563	2099|4613|4869|9611|79753	ESR1|MYCN|NPM1|NCOR1|SNIP1	-2.67157	HCV_related
GO Biological Processes	19	GO:0045444	fat cell differentiation	-4.18432	5.93444	5.77454	22539	211	144	8	5.55556	1.90885	1649|4091|6095|8091|8864|10891|22954|23414	DDIT3|SMAD6|RORA|HMGA2|PER2|PPARGC1A|TRIM32|ZFPM2	-2.66944	HCV_related
GO Biological Processes	19	GO:0010566	regulation of ketone biosynthetic process	-4.15679	36.1202	10.1566	22539	13	144	3	2.08333	1.19022	1958|10891|23408	EGR1|PPARGC1A|SIRT5	-2.64743	HCV_related
CORUM	33	CORUM:189	BAF complex	-4.15679	36.1202	10.1566	22539	13	144	3	2.08333	1.19022	6595|6597|6599	SMARCA2|SMARCA4|SMARCC1	-2.64743	HCV_related
GO Biological Processes	19	GO:0090068	positive regulation of cell cycle process	-4.14751	5.1225	5.51555	22539	275	144	9	6.25	2.01718	1820|2627|4869|5934|6604|8091|9700|57472|79733	ARID3A|GATA6|NPM1|RBL2|SMARCD3|HMGA2|ESPL1|CNOT6|E2F8	-2.64164	HCV_related
GO Biological Processes	19	GO:0030509	BMP signaling pathway	-4.14477	6.93447	6.00252	22539	158	144	7	4.86111	1.79211	1958|2627|3397|4091|4092|51176|64750	EGR1|GATA6|ID1|SMAD6|SMAD7|LEF1|SMURF2	-2.6396	HCV_related
GO Biological Processes	19	GO:0030330	DNA damage response, signal transduction by p53 class mediator	-4.11898	8.5375	6.35451	22539	110	144	6	4.16667	1.66522	1820|2305|4869|5934|57472|79733	ARID3A|FOXM1|NPM1|RBL2|CNOT6|E2F8	-2.61934	HCV_related
GO Biological Processes	19	GO:0006475	internal protein amino acid acetylation	-4.11039	6.84779	5.95243	22539	160	144	7	4.86111	1.79211	1810|8464|9329|10626|10891|51176|55689	DR1|SUPT3H|GTF3C4|TRIM16|PPARGC1A|LEF1|YEATS2	-2.61143	HCV_related
GO Biological Processes	19	GO:1901990	regulation of mitotic cell cycle phase transition	-4.10316	4.12885	5.17135	22539	417	144	11	7.63889	2.21349	1820|2146|4869|5934|6604|8091|9319|9700|9735|57472|79733	ARID3A|EZH2|NPM1|RBL2|SMARCD3|HMGA2|TRIP13|ESPL1|KNTC1|CNOT6|E2F8	-2.60626	HCV_related
GO Biological Processes	19	GO:0002065	columnar/cuboidal epithelial cell differentiation	-4.09711	8.46059	6.31833	22539	111	144	6	4.16667	1.66522	2627|3202|4613|5991|23493|51176	GATA6|HOXA5|MYCN|RFX3|HEY2|LEF1	-2.60089	HCV_related
GO Biological Processes	19	GO:0003179	heart valve morphogenesis	-4.09532	17.3912	7.89233	22539	36	144	4	2.77778	1.36946	4091|6662|23462|23493	SMAD6|SOX9|HEY1|HEY2	-2.60089	HCV_related
KEGG Pathway	24	hsa03030	DNA replication	-4.09532	17.3912	7.89233	22539	36	144	4	2.77778	1.36946	4171|4172|4173|4176	MCM2|MCM3|MCM4|MCM7	-2.60089	HCV_related
GO Biological Processes	19	GO:0010948	negative regulation of cell cycle process	-4.07888	4.49773	5.27291	22539	348	144	10	6.94444	2.1184	1820|2146|4869|5934|8091|9232|9319|9700|57472|79733	ARID3A|EZH2|NPM1|RBL2|HMGA2|PTTG1|TRIP13|ESPL1|CNOT6|E2F8	-2.58808	HCV_related
GO Biological Processes	19	GO:0044774	mitotic DNA integrity checkpoint	-4.07547	8.38504	6.28261	22539	112	144	6	4.16667	1.66522	1820|4869|5934|8091|57472|79733	ARID3A|NPM1|RBL2|HMGA2|CNOT6|E2F8	-2.58668	HCV_related
Canonical Pathways	11	M167	PID AP1 PATHWAY	-4.06521	11.1801	6.84023	22539	70	144	5	3.47222	1.52563	1958|1997|2099|2353|4094	EGR1|ELF1|ESR1|FOS|MAF	-2.5791	HCV_related
Reactome Gene Sets	6	R-HSA-400253	Circadian Clock	-4.06521	11.1801	6.84023	22539	70	144	5	3.47222	1.52563	6095|6604|8864|9611|10891	RORA|SMARCD3|PER2|NCOR1|PPARGC1A	-2.5791	HCV_related
CORUM	33	CORUM:5611	Emerin complex 24	-4.0541	33.5402	9.76596	22539	14	144	3	2.08333	1.19022	4171|4173|5934	MCM2|MCM4|RBL2	-2.57064	HCV_related
GO Biological Processes	19	GO:0003188	heart valve formation	-4.0541	33.5402	9.76596	22539	14	144	3	2.08333	1.19022	6662|23462|23493	SOX9|HEY1|HEY2	-2.57064	HCV_related
CORUM	33	CORUM:1230	WINAC complex	-4.0541	33.5402	9.76596	22539	14	144	3	2.08333	1.19022	6595|6597|6599	SMARCA2|SMARCA4|SMARCC1	-2.57064	HCV_related
Reactome Gene Sets	6	R-HSA-176187	Activation of ATR in response to replication stress	-4.04778	16.9212	7.77193	22539	37	144	4	2.77778	1.36946	4171|4172|4173|4176	MCM2|MCM3|MCM4|MCM7	-2.56565	HCV_related
GO Biological Processes	19	GO:2000142	regulation of DNA-templated transcription, initiation	-4.04778	16.9212	7.77193	22539	37	144	4	2.77778	1.36946	2099|3394|10923|23493	ESR1|IRF8|SUB1|HEY2	-2.56565	HCV_related
GO Biological Processes	19	GO:0044819	mitotic G1/S transition checkpoint	-4.03571	11.0226	6.78251	22539	71	144	5	3.47222	1.52563	1820|4869|5934|57472|79733	ARID3A|NPM1|RBL2|CNOT6|E2F8	-2.55621	HCV_related
GO Biological Processes	19	GO:0031571	mitotic G1 DNA damage checkpoint	-4.03571	11.0226	6.78251	22539	71	144	5	3.47222	1.52563	1820|4869|5934|57472|79733	ARID3A|NPM1|RBL2|CNOT6|E2F8	-2.55621	HCV_related
GO Biological Processes	19	GO:2000134	negative regulation of G1/S transition of mitotic cell cycle	-4.01182	8.1663	6.17804	22539	115	144	6	4.16667	1.66522	1820|2146|4869|5934|57472|79733	ARID3A|EZH2|NPM1|RBL2|CNOT6|E2F8	-2.53559	HCV_related
GO Biological Processes	19	GO:0048844	artery morphogenesis	-4.00668	10.8695	6.72593	22539	72	144	5	3.47222	1.52563	4092|4854|23462|23493|55636	SMAD7|NOTCH3|HEY1|HEY2|CHD7	-2.53369	HCV_related
GO Biological Processes	19	GO:0044783	G1 DNA damage checkpoint	-4.00668	10.8695	6.72593	22539	72	144	5	3.47222	1.52563	1820|4869|5934|57472|79733	ARID3A|NPM1|RBL2|CNOT6|E2F8	-2.53369	HCV_related
GO Biological Processes	19	GO:0030324	lung development	-3.99384	6.56075	5.78366	22539	167	144	7	4.86111	1.79211	2627|3202|3397|4613|6662|6943|23414	GATA6|HOXA5|ID1|MYCN|SOX9|TCF21|ZFPM2	-2.52279	HCV_related
Reactome Gene Sets	6	R-HSA-1980143	Signaling by NOTCH1	-3.97808	10.7206	6.67045	22539	73	144	5	3.47222	1.52563	3066|9611|23462|23493|79885	HDAC2|NCOR1|HEY1|HEY2|HDAC11	-2.51044	HCV_related
Reactome Gene Sets	6	R-HSA-69481	G2/M Checkpoints	-3.97765	6.5217	5.76034	22539	168	144	7	4.86111	1.79211	580|4171|4172|4173|4176|7158|83990	BARD1|MCM2|MCM3|MCM4|MCM7|TP53BP1|BRIP1	-2.51044	HCV_related
GO Biological Processes	19	GO:1903798	regulation of production of miRNAs involved in gene silencing by miRNA	-3.95922	31.3042	9.41431	22539	15	144	3	2.08333	1.19022	2099|4613|9611	ESR1|MYCN|NCOR1	-2.49709	HCV_related
GO Biological Processes	19	GO:0061614	pri-miRNA transcription by RNA polymerase II	-3.95679	16.0534	7.54466	22539	39	144	4	2.77778	1.36946	2353|4091|6597|6662	FOS|SMAD6|SMARCA4|SOX9	-2.49528	HCV_related
Canonical Pathways	11	M40	PID E2F PATHWAY	-3.94992	10.5757	6.61604	22539	74	144	5	3.47222	1.52563	1875|4172|4605|5934|6595	E2F5|MCM3|MYBL2|RBL2|SMARCA2	-2.48967	HCV_related
GO Biological Processes	19	GO:0032508	DNA duplex unwinding	-3.94992	10.5757	6.61604	22539	74	144	5	3.47222	1.52563	1643|4171|4173|4176|83990	DDB2|MCM2|MCM4|MCM7|BRIP1	-2.48967	HCV_related
GO Biological Processes	19	GO:0050767	regulation of neurogenesis	-3.93856	3.23677	4.73842	22539	677	144	14	9.72222	2.46883	2146|3066|3148|3397|4613|4854|6604|6662|6929|8864|22954|23394|23493|55636	EZH2|HDAC2|HMGB2|ID1|MYCN|NOTCH3|SMARCD3|SOX9|TCF3|PER2|TRIM32|ADNP|HEY2|CHD7	-2.47894	HCV_related
GO Biological Processes	19	GO:0043543	protein acylation	-3.937	5.46798	5.44932	22539	229	144	8	5.55556	1.90885	1810|3066|8464|9329|10626|10891|51176|55689	DR1|HDAC2|SUPT3H|GTF3C4|TRIM16|PPARGC1A|LEF1|YEATS2	-2.478	HCV_related
GO Biological Processes	19	GO:0071560	cellular response to transforming growth factor beta stimulus	-3.92394	5.4442	5.43227	22539	230	144	8	5.55556	1.90885	2353|3066|3397|4091|4092|6662|10891|64750	FOS|HDAC2|ID1|SMAD6|SMAD7|SOX9|PPARGC1A|SMURF2	-2.46868	HCV_related
GO Biological Processes	19	GO:0060412	ventricular septum morphogenesis	-3.91318	15.6521	7.43723	22539	40	144	4	2.77778	1.36946	4092|23414|23462|23493	SMAD7|ZFPM2|HEY1|HEY2	-2.46269	HCV_related
GO Biological Processes	19	GO:0003170	heart valve development	-3.91318	15.6521	7.43723	22539	40	144	4	2.77778	1.36946	4091|6662|23462|23493	SMAD6|SOX9|HEY1|HEY2	-2.46269	HCV_related
GO Biological Processes	19	GO:0051960	regulation of nervous system development	-3.91179	3.05705	4.65103	22539	768	144	15	10.4167	2.54564	2146|3066|3148|3397|4613|4854|6604|6662|6929|7289|8864|22954|23394|23493|55636	EZH2|HDAC2|HMGB2|ID1|MYCN|NOTCH3|SMARCD3|SOX9|TCF3|TULP3|PER2|TRIM32|ADNP|HEY2|CHD7	-2.46269	HCV_related
GO Biological Processes	19	GO:0071559	response to transforming growth factor beta	-3.87239	5.35114	5.36504	22539	234	144	8	5.55556	1.90885	2353|3066|3397|4091|4092|6662|10891|64750	FOS|HDAC2|ID1|SMAD6|SMAD7|SOX9|PPARGC1A|SMURF2	-2.43093	HCV_related
Reactome Gene Sets	6	R-HSA-1362300	Transcription of E2F targets under negative control by p107 (RBL1) and p130 (RBL2) in complex with H	-3.87108	29.3477	9.09552	22539	16	144	3	2.08333	1.19022	1875|4605|5934	E2F5|MYBL2|RBL2	-2.43093	HCV_related
GO Biological Processes	19	GO:0033151	V(D)J recombination	-3.87108	29.3477	9.09552	22539	16	144	3	2.08333	1.19022	3148|6929|51176	HMGB2|TCF3|LEF1	-2.43093	HCV_related
GO Biological Processes	19	GO:1905314	semi-lunar valve development	-3.87108	29.3477	9.09552	22539	16	144	3	2.08333	1.19022	4091|23462|23493	SMAD6|HEY1|HEY2	-2.43093	HCV_related
GO Biological Processes	19	GO:0072210	metanephric nephron development	-3.87075	15.2703	7.3336	22539	41	144	4	2.77778	1.36946	1958|6299|6662|6943	EGR1|SALL1|SOX9|TCF21	-2.43093	HCV_related
GO Biological Processes	19	GO:0035196	production of miRNAs involved in gene silencing by miRNA	-3.87075	15.2703	7.3336	22539	41	144	4	2.77778	1.36946	2099|4613|9611|79753	ESR1|MYCN|NCOR1|SNIP1	-2.43093	HCV_related
Reactome Gene Sets	6	R-HSA-3700989	Transcriptional Regulation by TP53	-3.87038	4.24176	5.03471	22539	369	144	10	6.94444	2.1184	580|1643|1820|2353|3066|4869|5934|57472|79733|83990	BARD1|DDB2|ARID3A|FOS|HDAC2|NPM1|RBL2|CNOT6|E2F8|BRIP1	-2.43093	HCV_related
GO Biological Processes	19	GO:1902807	negative regulation of cell cycle G1/S phase transition	-3.87035	7.69775	5.94817	22539	122	144	6	4.16667	1.66522	1820|2146|4869|5934|57472|79733	ARID3A|EZH2|NPM1|RBL2|CNOT6|E2F8	-2.43093	HCV_related
GO Biological Processes	19	GO:1901991	negative regulation of mitotic cell cycle phase transition	-3.85966	5.32837	5.34848	22539	235	144	8	5.55556	1.90885	1820|2146|4869|5934|8091|9319|57472|79733	ARID3A|EZH2|NPM1|RBL2|HMGA2|TRIP13|CNOT6|E2F8	-2.42203	HCV_related
GO Biological Processes	19	GO:0045787	positive regulation of cell cycle	-3.85131	4.21889	5.01295	22539	371	144	10	6.94444	2.1184	1820|2627|4869|5934|6604|8091|9700|22954|57472|79733	ARID3A|GATA6|NPM1|RBL2|SMARCD3|HMGA2|ESPL1|TRIM32|CNOT6|E2F8	-2.41665	HCV_related
GO Biological Processes	19	GO:0072401	signal transduction involved in DNA integrity checkpoint	-3.84135	10.0334	6.40836	22539	78	144	5	3.47222	1.52563	1820|4869|5934|57472|79733	ARID3A|NPM1|RBL2|CNOT6|E2F8	-2.40846	HCV_related
GO Biological Processes	19	GO:0072422	signal transduction involved in DNA damage checkpoint	-3.84135	10.0334	6.40836	22539	78	144	5	3.47222	1.52563	1820|4869|5934|57472|79733	ARID3A|NPM1|RBL2|CNOT6|E2F8	-2.40846	HCV_related
GO Biological Processes	19	GO:0035270	endocrine system development	-3.83162	7.57359	5.88583	22539	124	144	6	4.16667	1.66522	2627|3200|3202|5991|6299|6662	GATA6|HOXA3|HOXA5|RFX3|SALL1|SOX9	-2.40194	HCV_related
GO Biological Processes	19	GO:0006270	DNA replication initiation	-3.82943	14.9067	7.23355	22539	42	144	4	2.77778	1.36946	4171|4172|4173|4176	MCM2|MCM3|MCM4|MCM7	-2.40123	HCV_related
GO Biological Processes	19	GO:0034728	nucleosome organization	-3.82171	6.15531	5.53711	22539	178	144	7	4.86111	1.79211	3148|4171|4869|6597|6599|6604|6662	HMGB2|MCM2|NPM1|SMARCA4|SMARCC1|SMARCD3|SOX9	-2.39426	HCV_related
GO Biological Processes	19	GO:0072395	signal transduction involved in cell cycle checkpoint	-3.81518	9.90638	6.35877	22539	79	144	5	3.47222	1.52563	1820|4869|5934|57472|79733	ARID3A|NPM1|RBL2|CNOT6|E2F8	-2.39104	HCV_related
Reactome Gene Sets	6	R-HSA-3214858	RMTs methylate histone arginines	-3.81518	9.90638	6.35877	22539	79	144	5	3.47222	1.52563	1788|6595|6597|6599|6604	DNMT3A|SMARCA2|SMARCA4|SMARCC1|SMARCD3	-2.39104	HCV_related
Reactome Gene Sets	6	R-HSA-8878171	Transcriptional regulation by RUNX1	-3.8094	5.23919	5.28315	22539	239	144	8	5.55556	1.90885	1997|2099|6595|6597|6599|6604|6929|22955	ELF1|ESR1|SMARCA2|SMARCA4|SMARCC1|SMARCD3|TCF3|SCMH1	-2.38584	HCV_related
GO Biological Processes	19	GO:1901987	regulation of cell cycle phase transition	-3.79593	3.80914	4.83768	22539	452	144	11	7.63889	2.21349	1820|2146|4869|5934|6604|8091|9319|9700|9735|57472|79733	ARID3A|EZH2|NPM1|RBL2|SMARCD3|HMGA2|TRIP13|ESPL1|KNTC1|CNOT6|E2F8	-2.37415	HCV_related
GO Biological Processes	19	GO:0070482	response to oxygen levels	-3.79484	4.15175	4.94858	22539	377	144	10	6.94444	2.1184	863|1788|1958|2627|3066|6095|6940|9915|10891|83990	CBFA2T3|DNMT3A|EGR1|GATA6|HDAC2|RORA|ZNF354A|ARNT2|PPARGC1A|BRIP1	-2.37415	HCV_related
Reactome Gene Sets	6	R-HSA-157118	Signaling by NOTCH	-3.7936	7.45337	5.82486	22539	126	144	6	4.16667	1.66522	3066|4854|9611|23462|23493|79885	HDAC2|NOTCH3|NCOR1|HEY1|HEY2|HDAC11	-2.37406	HCV_related
Canonical Pathways	11	M223	PID BETA CATENIN NUC PATHWAY	-3.78937	9.78255	6.31007	22539	80	144	5	3.47222	1.52563	367|3066|6597|9968|51176	AR|HDAC2|SMARCA4|MED12|LEF1	-2.37046	HCV_related
GO Biological Processes	19	GO:0070920	regulation of production of small RNA involved in gene silencing by RNA	-3.7888	27.6213	8.80469	22539	17	144	3	2.08333	1.19022	2099|4613|9611	ESR1|MYCN|NCOR1	-2.37046	HCV_related
GO Biological Processes	19	GO:0045637	regulation of myeloid cell differentiation	-3.76015	5.15295	5.21927	22539	243	144	8	5.55556	1.90885	2353|3148|3149|3202|3204|9935|10456|51176	FOS|HMGB2|HMGB3|HOXA5|HOXA7|MAFB|HAX1|LEF1	-2.35133	HCV_related
Reactome Gene Sets	6	R-HSA-2173793	Transcriptional activity of SMAD2/SMAD3:SMAD4 heterotrimer	-3.74993	14.2292	7.04335	22539	44	144	4	2.77778	1.36946	1875|4092|9611|64750	E2F5|SMAD7|NCOR1|SMURF2	-2.34334	HCV_related
Reactome Gene Sets	6	R-HSA-69206	G1/S Transition	-3.73784	7.28004	5.73587	22539	129	144	6	4.16667	1.66522	1875|4171|4172|4173|4176|5934	E2F5|MCM2|MCM3|MCM4|MCM7|RBL2	-2.33401	HCV_related
GO Biological Processes	19	GO:0001701	in utero embryonic development	-3.71292	4.48627	4.98848	22539	314	144	9	6.25	2.01718	367|2627|9915|23414|23462|23493|51176|55636|79733	AR|GATA6|ARNT2|ZFPM2|HEY1|HEY2|LEF1|CHD7|E2F8	-2.31547	HCV_related
GO Biological Processes	19	GO:0031050	dsRNA fragmentation	-3.71165	13.913	6.95284	22539	45	144	4	2.77778	1.36946	2099|4613|9611|79753	ESR1|MYCN|NCOR1|SNIP1	-2.31547	HCV_related
GO Biological Processes	19	GO:0030857	negative regulation of epithelial cell differentiation	-3.71165	13.913	6.95284	22539	45	144	4	2.77778	1.36946	2146|3204|3397|6662	EZH2|HOXA7|ID1|SOX9	-2.31547	HCV_related
GO Biological Processes	19	GO:0070918	production of small RNA involved in gene silencing by RNA	-3.71165	13.913	6.95284	22539	45	144	4	2.77778	1.36946	2099|4613|9611|79753	ESR1|MYCN|NCOR1|SNIP1	-2.31547	HCV_related
GO Biological Processes	19	GO:0006337	nucleosome disassembly	-3.71165	26.0868	8.5379	22539	18	144	3	2.08333	1.19022	6597|6599|6604	SMARCA4|SMARCC1|SMARCD3	-2.31547	HCV_related
KEGG Pathway	24	hsa04350	TGF-beta signaling pathway	-3.68961	9.31672	6.12348	22539	84	144	5	3.47222	1.52563	1875|3397|4091|4092|64750	E2F5|ID1|SMAD6|SMAD7|SMURF2	-2.2972	HCV_related
GO Biological Processes	19	GO:0030099	myeloid cell differentiation	-3.64966	3.98272	4.78326	22539	393	144	10	6.94444	2.1184	863|2353|3148|3149|3202|3204|3394|9935|10456|51176	CBFA2T3|FOS|HMGB2|HMGB3|HOXA5|HOXA7|IRF8|MAFB|HAX1|LEF1	-2.26471	HCV_related
GO Biological Processes	19	GO:0042770	signal transduction in response to DNA damage	-3.64812	7.0084	5.59373	22539	134	144	6	4.16667	1.66522	1820|2305|4869|5934|57472|79733	ARID3A|FOXM1|NPM1|RBL2|CNOT6|E2F8	-2.26446	HCV_related
GO Biological Processes	19	GO:0001525	angiogenesis	-3.64784	3.4088	4.59037	22539	551	144	12	8.33333	2.30321	2627|3200|3202|3204|3397|4854|6095|6943|8091|23462|51176|79733	GATA6|HOXA3|HOXA5|HOXA7|ID1|NOTCH3|RORA|TCF21|HMGA2|HEY1|LEF1|E2F8	-2.26446	HCV_related
GO Biological Processes	19	GO:0060438	trachea development	-3.63905	24.7138	8.29196	22539	19	144	3	2.08333	1.19022	3202|6662|51176	HOXA5|SOX9|LEF1	-2.25829	HCV_related
GO Biological Processes	19	GO:0060749	mammary gland alveolus development	-3.63905	24.7138	8.29196	22539	19	144	3	2.08333	1.19022	367|2099|3202	AR|ESR1|HOXA5	-2.25829	HCV_related
GO Biological Processes	19	GO:0061377	mammary gland lobule development	-3.63905	24.7138	8.29196	22539	19	144	3	2.08333	1.19022	367|2099|3202	AR|ESR1|HOXA5	-2.25829	HCV_related
CORUM	33	CORUM:778	LARC complex (LCR-associated remodeling complex)	-3.63905	24.7138	8.29196	22539	19	144	3	2.08333	1.19022	3066|6597|6599	HDAC2|SMARCA4|SMARCC1	-2.25829	HCV_related
GO Biological Processes	19	GO:1901988	negative regulation of cell cycle phase transition	-3.61806	4.91046	5.03575	22539	255	144	8	5.55556	1.90885	1820|2146|4869|5934|8091|9319|57472|79733	ARID3A|EZH2|NPM1|RBL2|HMGA2|TRIP13|CNOT6|E2F8	-2.24353	HCV_related
GO Biological Processes	19	GO:0021545	cranial nerve development	-3.60217	13.0434	6.69775	22539	48	144	4	2.77778	1.36946	3200|6299|9935|55636	HOXA3|SALL1|MAFB|CHD7	-2.23072	HCV_related
GO Biological Processes	19	GO:0055010	ventricular cardiac muscle tissue morphogenesis	-3.60217	13.0434	6.69775	22539	48	144	4	2.77778	1.36946	4092|23414|23493|55636	SMAD7|ZFPM2|HEY2|CHD7	-2.23072	HCV_related
GO Biological Processes	19	GO:0006310	DNA recombination	-3.59517	4.87224	5.00629	22539	257	144	8	5.55556	1.90885	580|3148|3149|6929|7158|9319|51176|83990	BARD1|HMGB2|HMGB3|TCF3|TP53BP1|TRIP13|LEF1|BRIP1	-2.22663	HCV_related
GO Biological Processes	19	GO:0045639	positive regulation of myeloid cell differentiation	-3.59502	8.89323	5.94897	22539	88	144	5	3.47222	1.52563	2353|3148|3202|10456|51176	FOS|HMGB2|HOXA5|HAX1|LEF1	-2.22663	HCV_related
GO Biological Processes	19	GO:0048863	stem cell differentiation	-3.5725	4.83462	4.97712	22539	259	144	8	5.55556	1.90885	2099|2627|3204|6662|6929|6949|8091|51176	ESR1|GATA6|HOXA7|SOX9|TCF3|TCOF1|HMGA2|LEF1	-2.20766	HCV_related
GO Biological Processes	19	GO:0031498	chromatin disassembly	-3.5705	23.4781	8.06425	22539	20	144	3	2.08333	1.19022	6597|6599|6604	SMARCA4|SMARCC1|SMARCD3	-2.20766	HCV_related
GO Biological Processes	19	GO:0070932	histone H3 deacetylation	-3.5705	23.4781	8.06425	22539	20	144	3	2.08333	1.19022	3066|8864|79885	HDAC2|PER2|HDAC11	-2.20766	HCV_related
GO Biological Processes	19	GO:0060008	Sertoli cell differentiation	-3.5705	23.4781	8.06425	22539	20	144	3	2.08333	1.19022	6662|6943|51742	SOX9|TCF21|ARID4B	-2.20766	HCV_related
GO Biological Processes	19	GO:0032986	protein-DNA complex disassembly	-3.5705	23.4781	8.06425	22539	20	144	3	2.08333	1.19022	6597|6599|6604	SMARCA4|SMARCC1|SMARCD3	-2.20766	HCV_related
GO Biological Processes	19	GO:0030850	prostate gland development	-3.56733	12.7772	6.61773	22539	49	144	4	2.77778	1.36946	367|2099|6599|6662	AR|ESR1|SMARCC1|SOX9	-2.205	HCV_related
Reactome Gene Sets	6	R-HSA-69242	S Phase	-3.56218	6.75629	5.45871	22539	139	144	6	4.16667	1.66522	1875|4171|4172|4173|4176|5934	E2F5|MCM2|MCM3|MCM4|MCM7|RBL2	-2.20134	HCV_related
GO Biological Processes	19	GO:0060021	roof of mouth development	-3.54952	8.6956	5.86582	22539	90	144	5	3.47222	1.52563	1750|6943|23314|51176|55636	DLX6|TCF21|SATB2|LEF1|CHD7	-2.19068	HCV_related
GO Biological Processes	19	GO:0050673	epithelial cell proliferation	-3.53716	3.85519	4.65524	22539	406	144	10	6.94444	2.1184	367|687|1750|2099|3148|3202|3397|4831|6662|26298	AR|KLF9|DLX6|ESR1|HMGB2|HOXA5|ID1|NME2|SOX9|EHF	-2.18374	HCV_related
GO Biological Processes	19	GO:0007178	transmembrane receptor protein serine/threonine kinase signaling pathway	-3.52469	4.23029	4.76203	22539	333	144	9	6.25	2.01718	1958|2353|2627|3397|4091|4092|10923|51176|64750	EGR1|FOS|GATA6|ID1|SMAD6|SMAD7|SUB1|LEF1|SMURF2	-2.17372	HCV_related
GO Biological Processes	19	GO:0001822	kidney development	-3.50573	4.72516	4.89138	22539	265	144	8	5.55556	1.90885	1958|4091|4092|4854|6299|6662|6940|6943	EGR1|SMAD6|SMAD7|NOTCH3|SALL1|SOX9|ZNF354A|TCF21	-2.16092	HCV_related
CORUM	33	CORUM:5614	Emerin complex 32	-3.50559	22.3601	7.85257	22539	21	144	3	2.08333	1.19022	5934|6599|10284	RBL2|SMARCC1|SAP18	-2.16092	HCV_related
GO Biological Processes	19	GO:0060261	positive regulation of transcription initiation from RNA polymerase II promoter	-3.50559	22.3601	7.85257	22539	21	144	3	2.08333	1.19022	2099|3394|10923	ESR1|IRF8|SUB1	-2.16092	HCV_related
GO Biological Processes	19	GO:0003181	atrioventricular valve morphogenesis	-3.50559	22.3601	7.85257	22539	21	144	3	2.08333	1.19022	4091|23462|23493	SMAD6|HEY1|HEY2	-2.16092	HCV_related
KEGG Pathway	24	hsa05224	Breast cancer	-3.47972	6.5217	5.33018	22539	144	144	6	4.16667	1.66522	2099|2353|4854|23462|23493|51176	ESR1|FOS|NOTCH3|HEY1|HEY2|LEF1	-2.14316	HCV_related
GO Biological Processes	19	GO:0009410	response to xenobiotic stimulus	-3.47304	4.67226	4.84948	22539	268	144	8	5.55556	1.90885	1788|1958|3066|4176|6095|8856|9915|10891	DNMT3A|EGR1|HDAC2|MCM7|RORA|NR1I2|ARNT2|PPARGC1A	-2.13741	HCV_related
GO Biological Processes	19	GO:0060425	lung morphogenesis	-3.46732	12.0401	6.39103	22539	52	144	4	2.77778	1.36946	3202|3397|6662|6943	HOXA5|ID1|SOX9|TCF21	-2.13264	HCV_related
GO Biological Processes	19	GO:0035904	aorta development	-3.46732	12.0401	6.39103	22539	52	144	4	2.77778	1.36946	4091|23462|23493|55636	SMAD6|HEY1|HEY2|CHD7	-2.13264	HCV_related
Reactome Gene Sets	6	R-HSA-3214815	HDACs deacetylate histones	-3.46183	8.32558	5.70702	22539	94	144	5	3.47222	1.52563	3066|9611|10284|51317|51742	HDAC2|NCOR1|SAP18|PHF21A|ARID4B	-2.13043	HCV_related
GO Biological Processes	19	GO:0016055	Wnt signaling pathway	-3.4508	3.47123	4.46254	22539	496	144	11	7.63889	2.21349	1649|1958|2099|6299|6597|6662|8629|9968|10042|51176|64750	DDIT3|EGR1|ESR1|SALL1|SMARCA4|SOX9|JRK|MED12|HMGXB4|LEF1|SMURF2	-2.12079	HCV_related
GO Biological Processes	19	GO:0002064	epithelial cell development	-3.44739	5.34461	5.01081	22539	205	144	7	4.86111	1.79211	367|2099|3202|3397|5991|6662|51742	AR|ESR1|HOXA5|ID1|RFX3|SOX9|ARID4B	-2.11784	HCV_related
GO Biological Processes	19	GO:0060487	lung epithelial cell differentiation	-3.44395	21.3438	7.65509	22539	22	144	3	2.08333	1.19022	2627|3202|6662	GATA6|HOXA5|SOX9	-2.11534	HCV_related
GO Biological Processes	19	GO:0198738	cell-cell signaling by wnt	-3.43608	3.45729	4.4465	22539	498	144	11	7.63889	2.21349	1649|1958|2099|6299|6597|6662|8629|9968|10042|51176|64750	DDIT3|EGR1|ESR1|SALL1|SMARCA4|SOX9|JRK|MED12|HMGXB4|LEF1|SMURF2	-2.10862	HCV_related
GO Biological Processes	19	GO:0006383	transcription by RNA polymerase III	-3.43539	11.8129	6.31956	22539	53	144	4	2.77778	1.36946	367|9328|9329|10623	AR|GTF3C5|GTF3C4|POLR3C	-2.10862	HCV_related
Canonical Pathways	11	M151	PID AR TF PATHWAY	-3.43539	11.8129	6.31956	22539	53	144	4	2.77778	1.36946	367|1958|6595|6599	AR|EGR1|SMARCA2|SMARCC1	-2.10862	HCV_related
Reactome Gene Sets	6	R-HSA-212165	Epigenetic regulation of gene expression	-3.43183	6.38861	5.25596	22539	147	144	6	4.16667	1.66522	1788|2146|3066|10284|51742|64425	DNMT3A|EZH2|HDAC2|SAP18|ARID4B|POLR1E	-2.10552	HCV_related
GO Biological Processes	19	GO:0035690	cellular response to drug	-3.43094	4.10696	4.64953	22539	343	144	9	6.25	2.01718	687|1788|1958|2146|3066|3397|6662|8091|10891	KLF9|DNMT3A|EGR1|EZH2|HDAC2|ID1|SOX9|HMGA2|PPARGC1A	-2.1051	HCV_related
GO Biological Processes	19	GO:0001666	response to hypoxia	-3.41261	4.08315	4.62754	22539	345	144	9	6.25	2.01718	863|1788|1958|2627|6095|6940|9915|10891|83990	CBFA2T3|DNMT3A|EGR1|GATA6|RORA|ZNF354A|ARNT2|PPARGC1A|BRIP1	-2.09361	HCV_related
GO Biological Processes	19	GO:0003229	ventricular cardiac muscle tissue development	-3.40411	11.5941	6.24999	22539	54	144	4	2.77778	1.36946	4092|23414|23493|55636	SMAD7|ZFPM2|HEY2|CHD7	-2.08603	HCV_related
GO Biological Processes	19	GO:0006261	DNA-dependent DNA replication	-3.40052	6.30285	5.20762	22539	149	144	6	4.16667	1.66522	1602|4171|4172|4173|4176|79733	DACH1|MCM2|MCM3|MCM4|MCM7|E2F8	-2.08334	HCV_related
GO Biological Processes	19	GO:0001657	ureteric bud development	-3.39878	8.06808	5.59397	22539	97	144	5	3.47222	1.52563	4091|4092|6299|6662|6943	SMAD6|SMAD7|SALL1|SOX9|TCF21	-2.08205	HCV_related
GO Biological Processes	19	GO:1902895	positive regulation of pri-miRNA transcription by RNA polymerase II	-3.38529	20.4158	7.47027	22539	23	144	3	2.08333	1.19022	2353|4091|6597	FOS|SMAD6|SMARCA4	-2.07215	HCV_related
GO Biological Processes	19	GO:0060479	lung cell differentiation	-3.38529	20.4158	7.47027	22539	23	144	3	2.08333	1.19022	2627|3202|6662	GATA6|HOXA5|SOX9	-2.07215	HCV_related
GO Biological Processes	19	GO:0007530	sex determination	-3.38529	20.4158	7.47027	22539	23	144	3	2.08333	1.19022	367|6662|6943	AR|SOX9|TCF21	-2.07215	HCV_related
GO Biological Processes	19	GO:0072163	mesonephric epithelium development	-3.37825	7.98576	5.55736	22539	98	144	5	3.47222	1.52563	4091|4092|6299|6662|6943	SMAD6|SMAD7|SALL1|SOX9|TCF21	-2.06646	HCV_related
GO Biological Processes	19	GO:0072164	mesonephric tubule development	-3.37825	7.98576	5.55736	22539	98	144	5	3.47222	1.52563	4091|4092|6299|6662|6943	SMAD6|SMAD7|SALL1|SOX9|TCF21	-2.06646	HCV_related
GO Biological Processes	19	GO:0043331	response to dsRNA	-3.37825	7.98576	5.55736	22539	98	144	5	3.47222	1.52563	2099|4613|4869|9611|79753	ESR1|MYCN|NPM1|NCOR1|SNIP1	-2.06646	HCV_related
GO Biological Processes	19	GO:0032922	circadian regulation of gene expression	-3.37346	11.3833	6.18222	22539	55	144	4	2.77778	1.36946	3066|6095|8864|10891	HDAC2|RORA|PER2|PPARGC1A	-2.06433	HCV_related
GO Biological Processes	19	GO:0048589	developmental growth	-3.34719	3.15672	4.27522	22539	595	144	12	8.33333	2.30321	367|2099|2146|2627|3202|6299|6662|9968|23394|23414|23493|55636	AR|ESR1|EZH2|GATA6|HOXA5|SALL1|SOX9|MED12|ADNP|ZFPM2|HEY2|CHD7	-2.0477	HCV_related
Reactome Gene Sets	6	R-HSA-2151201	Transcriptional activation of mitochondrial biogenesis	-3.34342	11.1801	6.11618	22539	56	144	4	2.77778	1.36946	6604|9611|10891|23408	SMARCD3|NCOR1|PPARGC1A|SIRT5	-2.0448	HCV_related
GO Biological Processes	19	GO:0036293	response to decreased oxygen levels	-3.34059	3.99062	4.54121	22539	353	144	9	6.25	2.01718	863|1788|1958|2627|6095|6940|9915|10891|83990	CBFA2T3|DNMT3A|EGR1|GATA6|RORA|ZNF354A|ARNT2|PPARGC1A|BRIP1	-2.04456	HCV_related
GO Biological Processes	19	GO:0072001	renal system development	-3.33639	4.45611	4.67478	22539	281	144	8	5.55556	1.90885	1958|4091|4092|4854|6299|6662|6940|6943	EGR1|SMAD6|SMAD7|NOTCH3|SALL1|SOX9|ZNF354A|TCF21	-2.04122	HCV_related
GO Biological Processes	19	GO:0072012	glomerulus vasculature development	-3.32932	19.5651	7.29677	22539	24	144	3	2.08333	1.19022	1958|4854|6943	EGR1|NOTCH3|TCF21	-2.03501	HCV_related
GO Biological Processes	19	GO:0003171	atrioventricular valve development	-3.32932	19.5651	7.29677	22539	24	144	3	2.08333	1.19022	4091|23462|23493	SMAD6|HEY1|HEY2	-2.03501	HCV_related
GO Biological Processes	19	GO:0040029	regulation of gene expression, epigenetic	-3.32812	3.3562	4.32878	22539	513	144	11	7.63889	2.21349	1788|2099|2146|3066|4613|9611|23408|51742|57472|64425|79753	DNMT3A|ESR1|EZH2|HDAC2|MYCN|NCOR1|SIRT5|ARID4B|CNOT6|POLR1E|SNIP1	-2.03423	HCV_related
GO Biological Processes	19	GO:2000243	positive regulation of reproductive process	-3.31397	10.9839	6.0518	22539	57	144	4	2.77778	1.36946	367|6662|23414|64750	AR|SOX9|ZFPM2|SMURF2	-2.02306	HCV_related
Reactome Gene Sets	6	R-HSA-9006936	Signaling by TGF-beta family members	-3.29844	7.67259	5.41596	22539	102	144	5	3.47222	1.52563	1875|4091|4092|9611|64750	E2F5|SMAD6|SMAD7|NCOR1|SMURF2	-2.00881	HCV_related
GO Biological Processes	19	GO:0001823	mesonephros development	-3.29844	7.67259	5.41596	22539	102	144	5	3.47222	1.52563	4091|4092|6299|6662|6943	SMAD6|SMAD7|SALL1|SOX9|TCF21	-2.00881	HCV_related
GO Biological Processes	19	GO:0016444	somatic cell DNA recombination	-3.28508	10.7945	5.98899	22539	58	144	4	2.77778	1.36946	3148|6929|7158|51176	HMGB2|TCF3|TP53BP1|LEF1	-1.99924	HCV_related
GO Biological Processes	19	GO:0002562	somatic diversification of immune receptors via germline recombination within a single locus	-3.28508	10.7945	5.98899	22539	58	144	4	2.77778	1.36946	3148|6929|7158|51176	HMGB2|TCF3|TP53BP1|LEF1	-1.99924	HCV_related
GO Biological Processes	19	GO:0007283	spermatogenesis	-3.27918	3.31102	4.27533	22539	520	144	11	7.63889	2.21349	367|1788|3148|6595|6662|9232|9319|10657|22955|51742|83990	AR|DNMT3A|HMGB2|SMARCA2|SOX9|PTTG1|TRIP13|KHDRBS1|SCMH1|ARID4B|BRIP1	-1.99418	HCV_related
GO Biological Processes	19	GO:0043414	macromolecule methylation	-3.27594	4.36295	4.5977	22539	287	144	8	5.55556	1.90885	1788|2146|2353|6628|6894|9971|11108|51742	DNMT3A|EZH2|FOS|SNRPB|TARBP1|NR1H4|PRDM4|ARID4B	-1.99168	HCV_related
Reactome Gene Sets	6	R-HSA-9013508	NOTCH3 Intracellular Domain Regulates Transcription	-3.27584	18.7825	7.13345	22539	25	144	3	2.08333	1.19022	4854|23462|23493	NOTCH3|HEY1|HEY2	-1.99168	HCV_related
Canonical Pathways	11	M166	PID ATF2 PATHWAY	-3.25673	10.6116	5.9277	22539	59	144	4	2.77778	1.36946	1649|2099|2353|10891	DDIT3|ESR1|FOS|PPARGC1A	-1.9788	HCV_related
GO Biological Processes	19	GO:0045143	homologous chromosome segregation	-3.22891	10.4347	5.86786	22539	60	144	4	2.77778	1.36946	9232|9319|9700|83990	PTTG1|TRIP13|ESPL1|BRIP1	-1.9547	HCV_related
GO Biological Processes	19	GO:0048645	animal organ formation	-3.22891	10.4347	5.86786	22539	60	144	4	2.77778	1.36946	367|2627|3200|6604	AR|GATA6|HOXA3|SMARCD3	-1.9547	HCV_related
GO Biological Processes	19	GO:0052472	modulation by host of symbiont transcription	-3.22462	18.0601	6.97935	22539	26	144	3	2.08333	1.19022	6597|8091|51176	SMARCA4|HMGA2|LEF1	-1.95406	HCV_related
GO Biological Processes	19	GO:0060740	prostate gland epithelium morphogenesis	-3.22462	18.0601	6.97935	22539	26	144	3	2.08333	1.19022	367|2099|6662	AR|ESR1|SOX9	-1.95406	HCV_related
GO Biological Processes	19	GO:0061437	renal system vasculature development	-3.22462	18.0601	6.97935	22539	26	144	3	2.08333	1.19022	1958|4854|6943	EGR1|NOTCH3|TCF21	-1.95406	HCV_related
GO Biological Processes	19	GO:0003148	outflow tract septum morphogenesis	-3.22462	18.0601	6.97935	22539	26	144	3	2.08333	1.19022	2627|4091|23414	GATA6|SMAD6|ZFPM2	-1.95406	HCV_related
GO Biological Processes	19	GO:0043921	modulation by host of viral transcription	-3.22462	18.0601	6.97935	22539	26	144	3	2.08333	1.19022	6597|8091|51176	SMARCA4|HMGA2|LEF1	-1.95406	HCV_related
GO Biological Processes	19	GO:0061440	kidney vasculature development	-3.22462	18.0601	6.97935	22539	26	144	3	2.08333	1.19022	1958|4854|6943	EGR1|NOTCH3|TCF21	-1.95406	HCV_related
Reactome Gene Sets	6	R-HSA-69620	Cell Cycle Checkpoints	-3.21704	4.27361	4.5227	22539	293	144	8	5.55556	1.90885	580|4171|4172|4173|4176|7158|9735|83990	BARD1|MCM2|MCM3|MCM4|MCM7|TP53BP1|KNTC1|BRIP1	-1.94849	HCV_related
GO Biological Processes	19	GO:0002009	morphogenesis of an epithelium	-3.21078	3.24855	4.20052	22539	530	144	11	7.63889	2.21349	367|2099|3202|4613|6299|6662|6943|7289|9968|51176|64750	AR|ESR1|HOXA5|MYCN|SALL1|SOX9|TCF21|TULP3|MED12|LEF1|SMURF2	-1.94304	HCV_related
Reactome Gene Sets	6	R-HSA-8943724	Regulation of PTEN gene transcription	-3.2016	10.2637	5.80941	22539	61	144	4	2.77778	1.36946	1958|2146|3066|22955	EGR1|EZH2|HDAC2|SCMH1	-1.93547	HCV_related
GO Biological Processes	19	GO:0006260	DNA replication	-3.19774	4.24463	4.49815	22539	295	144	8	5.55556	1.90885	580|1602|4171|4172|4173|4176|79733|83990	BARD1|DACH1|MCM2|MCM3|MCM4|MCM7|E2F8|BRIP1	-1.93361	HCV_related
GO Biological Processes	19	GO:1903706	regulation of hemopoiesis	-3.1959	3.48599	4.26666	22539	449	144	10	6.94444	2.1184	2353|3148|3149|3202|3204|4092|6929|9935|10456|51176	FOS|HMGB2|HMGB3|HOXA5|HOXA7|SMAD7|TCF3|MAFB|HAX1|LEF1	-1.93354	HCV_related
GO Biological Processes	19	GO:0019218	regulation of steroid metabolic process	-3.18516	7.24633	5.21767	22539	108	144	5	3.47222	1.52563	1958|6095|9971|10891|23541	EGR1|RORA|NR1H4|PPARGC1A|SEC14L2	-1.92541	HCV_related
Reactome Gene Sets	6	R-HSA-1538133	G0 and Early G1	-3.1755	17.3912	6.83359	22539	27	144	3	2.08333	1.19022	1875|4605|5934	E2F5|MYBL2|RBL2	-1.91732	HCV_related
GO Biological Processes	19	GO:0052312	modulation of transcription in other organism involved in symbiotic interaction	-3.1755	17.3912	6.83359	22539	27	144	3	2.08333	1.19022	6597|8091|51176	SMARCA4|HMGA2|LEF1	-1.91732	HCV_related
Reactome Gene Sets	6	R-HSA-69278	Cell Cycle, Mitotic	-3.17057	3.21218	4.15648	22539	536	144	11	7.63889	2.21349	1875|2305|4171|4172|4173|4176|4605|5934|9232|9700|9735	E2F5|FOXM1|MCM2|MCM3|MCM4|MCM7|MYBL2|RBL2|PTTG1|ESPL1|KNTC1	-1.91363	HCV_related
GO Biological Processes	19	GO:0071466	cellular response to xenobiotic stimulus	-3.16652	5.69167	4.85021	22539	165	144	6	4.16667	1.66522	1958|4176|6095|8856|9915|10891	EGR1|MCM7|RORA|NR1I2|ARNT2|PPARGC1A	-1.9111	HCV_related
GO Biological Processes	19	GO:0048232	male gamete generation	-3.1507	3.1943	4.13469	22539	539	144	11	7.63889	2.21349	367|1788|3148|6595|6662|9232|9319|10657|22955|51742|83990	AR|DNMT3A|HMGB2|SMARCA2|SOX9|PTTG1|TRIP13|KHDRBS1|SCMH1|ARID4B|BRIP1	-1.89656	HCV_related
GO Biological Processes	19	GO:0043500	muscle adaptation	-3.13118	7.05049	5.12413	22539	111	144	5	3.47222	1.52563	2146|2627|9569|10891|23493	EZH2|GATA6|GTF2IRD1|PPARGC1A|HEY2	-1.88004	HCV_related
Reactome Gene Sets	6	R-HSA-76066	RNA Polymerase III Transcription Initiation From Type 2 Promoter	-3.12831	16.7701	6.69544	22539	28	144	3	2.08333	1.19022	9328|9329|10623	GTF3C5|GTF3C4|POLR3C	-1.8789	HCV_related
GO Biological Processes	19	GO:2000144	positive regulation of DNA-templated transcription, initiation	-3.12831	16.7701	6.69544	22539	28	144	3	2.08333	1.19022	2099|3394|10923	ESR1|IRF8|SUB1	-1.8789	HCV_related
GO Biological Processes	19	GO:0060512	prostate gland morphogenesis	-3.12831	16.7701	6.69544	22539	28	144	3	2.08333	1.19022	367|2099|6662	AR|ESR1|SOX9	-1.8789	HCV_related
Reactome Gene Sets	6	R-HSA-201451	Signaling by BMP	-3.12831	16.7701	6.69544	22539	28	144	3	2.08333	1.19022	4091|4092|64750	SMAD6|SMAD7|SMURF2	-1.8789	HCV_related
GO Biological Processes	19	GO:0042733	embryonic digit morphogenesis	-3.12254	9.78255	5.64189	22539	64	144	4	2.77778	1.36946	3066|4613|6299|7289	HDAC2|MYCN|SALL1|TULP3	-1.87526	HCV_related
GO Biological Processes	19	GO:0014031	mesenchymal cell development	-3.12254	9.78255	5.64189	22539	64	144	4	2.77778	1.36946	6662|6949|23493|51176	SOX9|TCOF1|HEY2|LEF1	-1.87526	HCV_related
GO Biological Processes	19	GO:0046782	regulation of viral transcription	-3.12254	9.78255	5.64189	22539	64	144	4	2.77778	1.36946	6597|8091|22954|51176	SMARCA4|HMGA2|TRIM32|LEF1	-1.87526	HCV_related
GO Biological Processes	19	GO:0055008	cardiac muscle tissue morphogenesis	-3.12254	9.78255	5.64189	22539	64	144	4	2.77778	1.36946	4092|23414|23493|55636	SMAD7|ZFPM2|HEY2|CHD7	-1.87526	HCV_related
GO Biological Processes	19	GO:0002761	regulation of myeloid leukocyte differentiation	-3.11355	6.98754	5.09372	22539	112	144	5	3.47222	1.52563	2353|3204|9935|10456|51176	FOS|HOXA7|MAFB|HAX1|LEF1	-1.86743	HCV_related
GO Biological Processes	19	GO:0008285	negative regulation of cell proliferation	-3.10605	2.80658	3.96481	22539	725	144	13	9.02778	2.38816	367|687|863|1602|2117|4091|4869|6595|6662|8864|10891|22954|83990	AR|KLF9|CBFA2T3|DACH1|ETV3|SMAD6|NPM1|SMARCA2|SOX9|PER2|PPARGC1A|TRIM32|BRIP1	-1.86078	HCV_related
GO Biological Processes	19	GO:0030858	positive regulation of epithelial cell differentiation	-3.0971	9.63205	5.58848	22539	65	144	4	2.77778	1.36946	4831|5991|6662|10626	NME2|RFX3|SOX9|TRIM16	-1.85517	HCV_related
Reactome Gene Sets	6	R-HSA-76061	RNA Polymerase III Transcription Initiation From Type 1 Promoter	-3.08291	16.1918	6.56424	22539	29	144	3	2.08333	1.19022	9328|9329|10623	GTF3C5|GTF3C4|POLR3C	-1.84339	HCV_related
GO Biological Processes	19	GO:0060322	head development	-3.07328	2.78354	3.93095	22539	731	144	13	9.02778	2.38816	1750|2146|3397|4854|6095|6299|7289|9915|9935|10891|23314|51176|55636	DLX6|EZH2|ID1|NOTCH3|RORA|SALL1|TULP3|ARNT2|MAFB|PPARGC1A|SATB2|LEF1|CHD7	-1.83513	HCV_related
GO Biological Processes	19	GO:0035265	organ growth	-3.0724	5.46003	4.70827	22539	172	144	6	4.16667	1.66522	367|2099|2627|6662|23414|23493	AR|ESR1|GATA6|SOX9|ZFPM2|HEY2	-1.83463	HCV_related
GO Biological Processes	19	GO:0008202	steroid metabolic process	-3.04903	4.02626	4.30923	22539	311	144	8	5.55556	1.90885	1958|2099|6095|8431|8856|9971|10891|23541	EGR1|ESR1|RORA|NR0B2|NR1I2|NR1H4|PPARGC1A|SEC14L2	-1.81574	HCV_related
GO Biological Processes	19	GO:2000045	regulation of G1/S transition of mitotic cell cycle	-3.04634	5.39727	4.66914	22539	174	144	6	4.16667	1.66522	1820|2146|4869|5934|57472|79733	ARID3A|EZH2|NPM1|RBL2|CNOT6|E2F8	-1.8138	HCV_related
GO Biological Processes	19	GO:0042471	ear morphogenesis	-3.04482	6.74659	4.97572	22539	116	144	5	3.47222	1.52563	1750|6299|6662|9935|55636	DLX6|SALL1|SOX9|MAFB|CHD7	-1.81302	HCV_related
KEGG Pathway	24	hsa04919	Thyroid hormone signaling pathway	-3.04482	6.74659	4.97572	22539	116	144	5	3.47222	1.52563	2099|3066|4854|9611|9968	ESR1|HDAC2|NOTCH3|NCOR1|MED12	-1.81302	HCV_related
GO Biological Processes	19	GO:0031128	developmental induction	-3.03918	15.6521	6.4394	22539	30	144	3	2.08333	1.19022	367|6299|6662	AR|SALL1|SOX9	-1.8096	HCV_related
GO Biological Processes	19	GO:0030851	granulocyte differentiation	-3.03918	15.6521	6.4394	22539	30	144	3	2.08333	1.19022	863|10456|51176	CBFA2T3|HAX1|LEF1	-1.8096	HCV_related
Canonical Pathways	11	M105	PID TELOMERASE PATHWAY	-3.0233	9.20711	5.43497	22539	68	144	4	2.77778	1.36946	2099|2353|3066|10284	ESR1|FOS|HDAC2|SAP18	-1.79813	HCV_related
Reactome Gene Sets	6	R-HSA-68867	Assembly of the pre-replicative complex	-3.0233	9.20711	5.43497	22539	68	144	4	2.77778	1.36946	4171|4172|4173|4176	MCM2|MCM3|MCM4|MCM7	-1.79813	HCV_related
GO Biological Processes	19	GO:0045727	positive regulation of translation	-3.01146	6.63224	4.91879	22539	118	144	5	3.47222	1.52563	2099|4869|9611|10657|22927	ESR1|NPM1|NCOR1|KHDRBS1|HABP4	-1.78702	HCV_related
GO Biological Processes	19	GO:0002200	somatic diversification of immune receptors	-2.9995	9.07367	5.38589	22539	69	144	4	2.77778	1.36946	3148|6929|7158|51176	HMGB2|TCF3|TP53BP1|LEF1	-1.77833	HCV_related
GO Biological Processes	19	GO:0035914	skeletal muscle cell differentiation	-2.9995	9.07367	5.38589	22539	69	144	4	2.77778	1.36946	1958|2353|3131|9328	EGR1|FOS|HLF|GTF3C5	-1.77833	HCV_related
GO Biological Processes	19	GO:0003401	axis elongation	-2.99701	15.1472	6.32042	22539	31	144	3	2.08333	1.19022	2099|6662|9968	ESR1|SOX9|MED12	-1.77656	HCV_related
GO Biological Processes	19	GO:0040008	regulation of growth	-2.98894	2.87194	3.89557	22539	654	144	12	8.33333	2.30321	367|2627|3394|6595|6597|8091|22954|23394|23414|23493|51176|55636	AR|GATA6|IRF8|SMARCA2|SMARCA4|HMGA2|TRIM32|ADNP|ZFPM2|HEY2|LEF1|CHD7	-1.77029	HCV_related
GO Biological Processes	19	GO:0007219	Notch signaling pathway	-2.98272	5.24651	4.57389	22539	179	144	6	4.16667	1.66522	4854|6662|8431|9971|23462|23493	NOTCH3|SOX9|NR0B2|NR1H4|HEY1|HEY2	-1.76481	HCV_related
GO Biological Processes	19	GO:0032844	regulation of homeostatic process	-2.98238	3.26766	4.02259	22539	479	144	10	6.94444	2.1184	1649|3148|3202|4092|6095|6597|9935|9971|10891|55636	DDIT3|HMGB2|HOXA5|SMAD7|RORA|SMARCA4|MAFB|NR1H4|PPARGC1A|CHD7	-1.76481	HCV_related
Reactome Gene Sets	6	R-HSA-69052	Switching of origins to a post-replicative state	-2.95304	8.81808	5.29066	22539	71	144	4	2.77778	1.36946	4171|4172|4173|4176	MCM2|MCM3|MCM4|MCM7	-1.74118	HCV_related
Reactome Gene Sets	6	R-HSA-68949	Orc1 removal from chromatin	-2.95304	8.81808	5.29066	22539	71	144	4	2.77778	1.36946	4171|4172|4173|4176	MCM2|MCM3|MCM4|MCM7	-1.74118	HCV_related
Reactome Gene Sets	6	R-HSA-5619507	Activation of HOX genes during differentiation	-2.94666	6.41479	4.80879	22539	122	144	5	3.47222	1.52563	2146|3200|9611|9935|57472	EZH2|HOXA3|NCOR1|MAFB|CNOT6	-1.73621	HCV_related
Reactome Gene Sets	6	R-HSA-5617472	Activation of anterior HOX genes in hindbrain development during early embryogenesis	-2.94666	6.41479	4.80879	22539	122	144	5	3.47222	1.52563	2146|3200|9611|9935|57472	EZH2|HOXA3|NCOR1|MAFB|CNOT6	-1.73621	HCV_related
GO Biological Processes	19	GO:0032652	regulation of interleukin-1 production	-2.93036	8.6956	5.24445	22539	72	144	4	2.77778	1.36946	1958|3066|9971|10626	EGR1|HDAC2|NR1H4|TRIM16	-1.72237	HCV_related
GO Biological Processes	19	GO:0021675	nerve development	-2.93036	8.6956	5.24445	22539	72	144	4	2.77778	1.36946	3200|6299|9935|55636	HOXA3|SALL1|MAFB|CHD7	-1.72237	HCV_related
GO Biological Processes	19	GO:0001101	response to acid chemical	-2.92664	3.85282	4.154	22539	325	144	8	5.55556	1.90885	1788|1958|3066|6662|6940|9971|10626|10891	DNMT3A|EGR1|HDAC2|SOX9|ZNF354A|NR1H4|TRIM16|PPARGC1A	-1.72006	HCV_related
GO Biological Processes	19	GO:0014898	cardiac muscle hypertrophy in response to stress	-2.91691	14.2292	6.09823	22539	33	144	3	2.08333	1.19022	2146|2627|23493	EZH2|GATA6|HEY2	-1.71451	HCV_related
GO Biological Processes	19	GO:0014887	cardiac muscle adaptation	-2.91691	14.2292	6.09823	22539	33	144	3	2.08333	1.19022	2146|2627|23493	EZH2|GATA6|HEY2	-1.71451	HCV_related
GO Biological Processes	19	GO:0003299	muscle hypertrophy in response to stress	-2.91691	14.2292	6.09823	22539	33	144	3	2.08333	1.19022	2146|2627|23493	EZH2|GATA6|HEY2	-1.71451	HCV_related
GO Biological Processes	19	GO:0071363	cellular response to growth factor stimulus	-2.91608	2.81597	3.8176	22539	667	144	12	8.33333	2.30321	1958|2353|2627|3066|3397|4091|4092|4176|6662|10891|51176|64750	EGR1|FOS|GATA6|HDAC2|ID1|SMAD6|SMAD7|MCM7|SOX9|PPARGC1A|LEF1|SMURF2	-1.71402	HCV_related
GO Biological Processes	19	GO:0032355	response to estradiol	-2.91518	6.31132	4.75563	22539	124	144	5	3.47222	1.52563	1788|2099|2146|9915|10891	DNMT3A|ESR1|EZH2|ARNT2|PPARGC1A	-1.71381	HCV_related
GO Biological Processes	19	GO:0030098	lymphocyte differentiation	-2.90971	3.82926	4.13253	22539	327	144	8	5.55556	1.90885	1958|3149|4092|6095|6929|9935|51176|55636	EGR1|HMGB3|SMAD7|RORA|TCF3|MAFB|LEF1|CHD7	-1.70869	HCV_related
Reactome Gene Sets	6	R-HSA-69300	Removal of licensing factors from origins	-2.90802	8.57648	5.19912	22539	73	144	4	2.77778	1.36946	4171|4172|4173|4176	MCM2|MCM3|MCM4|MCM7	-1.70804	HCV_related
Reactome Gene Sets	6	R-HSA-170834	Signaling by TGF-beta Receptor Complex	-2.90802	8.57648	5.19912	22539	73	144	4	2.77778	1.36946	1875|4092|9611|64750	E2F5|SMAD7|NCOR1|SMURF2	-1.70804	HCV_related
GO Biological Processes	19	GO:0010942	positive regulation of cell death	-2.90505	2.80755	3.80577	22539	669	144	12	8.33333	2.30321	580|1649|1788|1958|2353|3202|4605|4613|5326|8091|10284|10891	BARD1|DDIT3|DNMT3A|EGR1|FOS|HOXA5|MYBL2|MYCN|PLAGL2|HMGA2|SAP18|PPARGC1A	-1.70575	HCV_related
GO Biological Processes	19	GO:0006397	mRNA processing	-2.90195	3.1878	3.93031	22539	491	144	10	6.94444	2.1184	580|6628|6632|8458|10284|10657|10891|22927|22984|29890	BARD1|SNRPB|SNRPD1|TTF2|SAP18|KHDRBS1|PPARGC1A|HABP4|PDCD11|RBM15B	-1.70403	HCV_related
Reactome Gene Sets	6	R-HSA-3108232	SUMO E3 ligases SUMOylate target proteins	-2.89966	6.26083	4.72948	22539	125	144	5	3.47222	1.52563	3066|7158|10401|22955|23314	HDAC2|TP53BP1|PIAS3|SCMH1|SATB2	-1.70208	HCV_related
GO Biological Processes	19	GO:0050679	positive regulation of epithelial cell proliferation	-2.89713	5.04906	4.44637	22539	186	144	6	4.16667	1.66522	367|1750|3148|3397|4831|6662	AR|DLX6|HMGB2|ID1|NME2|SOX9	-1.69989	HCV_related
GO Biological Processes	19	GO:0001819	positive regulation of cytokine production	-2.89648	3.45267	4.00896	22539	408	144	9	6.25	2.01718	1649|1958|3066|3148|3394|6095|10623|10626|22954	DDIT3|EGR1|HDAC2|HMGB2|IRF8|RORA|POLR3C|TRIM16|TRIM32	-1.69959	HCV_related
GO Biological Processes	19	GO:0045927	positive regulation of growth	-2.88936	4.29665	4.24531	22539	255	144	7	4.86111	1.79211	2627|22954|23394|23414|23493|51176|55636	GATA6|TRIM32|ADNP|ZFPM2|HEY2|LEF1|CHD7	-1.69349	HCV_related
GO Biological Processes	19	GO:1902105	regulation of leukocyte differentiation	-2.88936	4.29665	4.24531	22539	255	144	7	4.86111	1.79211	2353|3149|3204|4092|9935|10456|51176	FOS|HMGB3|HOXA7|SMAD7|MAFB|HAX1|LEF1	-1.69349	HCV_related
GO Biological Processes	19	GO:0007346	regulation of mitotic cell cycle	-2.88313	2.79086	3.78223	22539	673	144	12	8.33333	2.30321	1820|2146|4869|5934|6604|8091|9232|9319|9700|9735|57472|79733	ARID3A|EZH2|NPM1|RBL2|SMARCD3|HMGA2|PTTG1|TRIP13|ESPL1|KNTC1|CNOT6|E2F8	-1.68931	HCV_related
GO Biological Processes	19	GO:0061384	heart trabecula morphogenesis	-2.87882	13.8107	5.99425	22539	34	144	3	2.08333	1.19022	23462|23493|55636	HEY1|HEY2|CHD7	-1.68568	HCV_related
GO Biological Processes	19	GO:0042063	gliogenesis	-2.86989	4.26321	4.21889	22539	257	144	7	4.86111	1.79211	2146|3066|4613|6662|9968|51176|79885	EZH2|HDAC2|MYCN|SOX9|MED12|LEF1|HDAC11	-1.67844	HCV_related
GO Biological Processes	19	GO:0033143	regulation of intracellular steroid hormone receptor signaling pathway	-2.86436	8.34778	5.11101	22539	75	144	4	2.77778	1.36946	367|2099|6597|6943	AR|ESR1|SMARCA4|TCF21	-1.67392	HCV_related
GO Biological Processes	19	GO:0002573	myeloid leukocyte differentiation	-2.84993	4.94276	4.37635	22539	190	144	6	4.16667	1.66522	863|2353|3204|9935|10456|51176	CBFA2T3|FOS|HOXA7|MAFB|HAX1|LEF1	-1.66252	HCV_related
GO Biological Processes	19	GO:0003151	outflow tract morphogenesis	-2.84301	8.23794	5.06817	22539	76	144	4	2.77778	1.36946	2627|4091|23414|23493	GATA6|SMAD6|ZFPM2|HEY2	-1.6576	HCV_related
Reactome Gene Sets	6	R-HSA-69304	Regulation of DNA replication	-2.84301	8.23794	5.06817	22539	76	144	4	2.77778	1.36946	4171|4172|4173|4176	MCM2|MCM3|MCM4|MCM7	-1.6576	HCV_related
GO Biological Processes	19	GO:0035909	aorta morphogenesis	-2.84193	13.4161	5.89457	22539	35	144	3	2.08333	1.19022	23462|23493|55636	HEY1|HEY2|CHD7	-1.65718	HCV_related
GO Biological Processes	19	GO:0002931	response to ischemia	-2.84193	13.4161	5.89457	22539	35	144	3	2.08333	1.19022	1958|8864|10891	EGR1|PER2|PPARGC1A	-1.65718	HCV_related
GO Biological Processes	19	GO:1902806	regulation of cell cycle G1/S phase transition	-2.82678	4.89128	4.34207	22539	192	144	6	4.16667	1.66522	1820|2146|4869|5934|57472|79733	ARID3A|EZH2|NPM1|RBL2|CNOT6|E2F8	-1.64469	HCV_related
GO Biological Processes	19	GO:0043254	regulation of protein complex assembly	-2.82414	3.37007	3.92202	22539	418	144	9	6.25	2.01718	1643|2099|3394|4091|6047|10456|10923|23493|57472	DDB2|ESR1|IRF8|SMAD6|RNF4|HAX1|SUB1|HEY2|CNOT6	-1.6428	HCV_related
Reactome Gene Sets	6	R-HSA-2990846	SUMOylation	-2.80945	5.97408	4.57836	22539	131	144	5	3.47222	1.52563	3066|7158|10401|22955|23314	HDAC2|TP53BP1|PIAS3|SCMH1|SATB2	-1.63065	HCV_related
GO Biological Processes	19	GO:0060428	lung epithelium development	-2.80617	13.0434	5.79887	22539	36	144	3	2.08333	1.19022	2627|3202|6662	GATA6|HOXA5|SOX9	-1.62802	HCV_related
GO Biological Processes	19	GO:0060045	positive regulation of cardiac muscle cell proliferation	-2.80617	13.0434	5.79887	22539	36	144	3	2.08333	1.19022	2627|23414|23493	GATA6|ZFPM2|HEY2	-1.62802	HCV_related
GO Biological Processes	19	GO:0010001	glial cell differentiation	-2.80392	4.84085	4.30826	22539	194	144	6	4.16667	1.66522	3066|4613|6662|9968|51176|79885	HDAC2|MYCN|SOX9|MED12|LEF1|HDAC11	-1.62611	HCV_related
GO Biological Processes	19	GO:0060415	muscle tissue morphogenesis	-2.80125	8.02671	4.9848	22539	78	144	4	2.77778	1.36946	4092|23414|23493|55636	SMAD7|ZFPM2|HEY2|CHD7	-1.62409	HCV_related
GO Biological Processes	19	GO:1901216	positive regulation of neuron death	-2.80125	8.02671	4.9848	22539	78	144	4	2.77778	1.36946	1649|1958|2353|4605	DDIT3|EGR1|FOS|MYBL2	-1.62409	HCV_related
GO Biological Processes	19	GO:0001654	eye development	-2.79478	3.67204	3.98682	22539	341	144	8	5.55556	1.90885	3066|4094|6297|6597|6604|6662|7289|55636	HDAC2|MAF|SALL2|SMARCA4|SMARCD3|SOX9|TULP3|CHD7	-1.62023	HCV_related
Reactome Gene Sets	6	R-HSA-2559583	Cellular Senescence	-2.7926	4.81603	4.29152	22539	195	144	6	4.16667	1.66522	2114|2146|2353|3397|8091|22955	ETS2|EZH2|FOS|ID1|HMGA2|SCMH1	-1.61859	HCV_related
GO Biological Processes	19	GO:0071229	cellular response to acid chemical	-2.78135	4.79145	4.27491	22539	196	144	6	4.16667	1.66522	1788|1958|3066|6662|9971|10891	DNMT3A|EGR1|HDAC2|SOX9|NR1H4|PPARGC1A	-1.61004	HCV_related
Reactome Gene Sets	6	R-HSA-76046	RNA Polymerase III Transcription Initiation	-2.77147	12.6909	5.70691	22539	37	144	3	2.08333	1.19022	9328|9329|10623	GTF3C5|GTF3C4|POLR3C	-1.60427	HCV_related
GO Biological Processes	19	GO:0071867	response to monoamine	-2.77147	12.6909	5.70691	22539	37	144	3	2.08333	1.19022	3066|3397|10891	HDAC2|ID1|PPARGC1A	-1.60427	HCV_related
GO Biological Processes	19	GO:0071869	response to catecholamine	-2.77147	12.6909	5.70691	22539	37	144	3	2.08333	1.19022	3066|3397|10891	HDAC2|ID1|PPARGC1A	-1.60427	HCV_related
GO Biological Processes	19	GO:0048286	lung alveolus development	-2.77147	12.6909	5.70691	22539	37	144	3	2.08333	1.19022	2627|3202|6943	GATA6|HOXA5|TCF21	-1.60427	HCV_related
GO Biological Processes	19	GO:1905114	cell surface receptor signaling pathway involved in cell-cell signaling	-2.77137	2.86477	3.71559	22539	601	144	11	7.63889	2.21349	1649|1958|2099|6299|6597|6662|8629|9968|10042|51176|64750	DDIT3|EGR1|ESR1|SALL1|SMARCA4|SOX9|JRK|MED12|HMGXB4|LEF1|SMURF2	-1.60427	HCV_related
GO Biological Processes	19	GO:0070848	response to growth factor	-2.77108	2.70641	3.66143	22539	694	144	12	8.33333	2.30321	1958|2353|2627|3066|3397|4091|4092|4176|6662|10891|51176|64750	EGR1|FOS|GATA6|HDAC2|ID1|SMAD6|SMAD7|MCM7|SOX9|PPARGC1A|LEF1|SMURF2	-1.60427	HCV_related
GO Biological Processes	19	GO:0030879	mammary gland development	-2.76613	5.84033	4.50628	22539	134	144	5	3.47222	1.52563	367|2099|3202|6662|51176	AR|ESR1|HOXA5|SOX9|LEF1	-1.6001	HCV_related
GO Biological Processes	19	GO:0007420	brain development	-2.76587	2.70252	3.65579	22539	695	144	12	8.33333	2.30321	2146|3397|4854|6095|6299|7289|9915|9935|10891|23314|51176|55636	EZH2|ID1|NOTCH3|RORA|SALL1|TULP3|ARNT2|MAFB|PPARGC1A|SATB2|LEF1|CHD7	-1.6001	HCV_related
GO Biological Processes	19	GO:0071456	cellular response to hypoxia	-2.75905	4.74306	4.242	22539	198	144	6	4.16667	1.66522	1788|1958|2627|6095|10891|83990	DNMT3A|EGR1|GATA6|RORA|PPARGC1A|BRIP1	-1.5951	HCV_related
GO Biological Processes	19	GO:0043044	ATP-dependent chromatin remodeling	-2.74082	7.72942	4.86517	22539	81	144	4	2.77778	1.36946	3066|4869|6597|6599	HDAC2|NPM1|SMARCA4|SMARCC1	-1.5799	HCV_related
GO Biological Processes	19	GO:0032259	methylation	-2.73959	3.59818	3.91682	22539	348	144	8	5.55556	1.90885	1788|2146|2353|6628|6894|9971|11108|51742	DNMT3A|EZH2|FOS|SNRPB|TARBP1|NR1H4|PRDM4|ARID4B	-1.57911	HCV_related
Reactome Gene Sets	6	R-HSA-8864260	Transcriptional regulation by the AP-2 (TFAP2) family of transcription factors	-2.73777	12.3569	5.61842	22539	38	144	3	2.08333	1.19022	2099|4605|4869	ESR1|MYBL2|NPM1	-1.57855	HCV_related
Canonical Pathways	11	M229	PID P38 ALPHA BETA DOWNSTREAM PATHWAY	-2.73777	12.3569	5.61842	22539	38	144	3	2.08333	1.19022	1649|2099|10891	DDIT3|ESR1|PPARGC1A	-1.57855	HCV_related
GO Biological Processes	19	GO:0050810	regulation of steroid biosynthetic process	-2.72123	7.63516	4.82665	22539	82	144	4	2.77778	1.36946	1958|9971|10891|23541	EGR1|NR1H4|PPARGC1A|SEC14L2	-1.56545	HCV_related
GO Biological Processes	19	GO:0032612	interleukin-1 production	-2.72123	7.63516	4.82665	22539	82	144	4	2.77778	1.36946	1958|3066|9971|10626	EGR1|HDAC2|NR1H4|TRIM16	-1.56545	HCV_related
GO Biological Processes	19	GO:0034250	positive regulation of cellular amide metabolic process	-2.71011	5.67104	4.4135	22539	138	144	5	3.47222	1.52563	2099|4869|9611|10657|22927	ESR1|NPM1|NCOR1|KHDRBS1|HABP4	-1.55681	HCV_related
GO Biological Processes	19	GO:0072006	nephron development	-2.71011	5.67104	4.4135	22539	138	144	5	3.47222	1.52563	1958|4854|6299|6662|6943	EGR1|NOTCH3|SALL1|SOX9|TCF21	-1.55681	HCV_related
GO Biological Processes	19	GO:0050678	regulation of epithelial cell proliferation	-2.70869	3.55729	3.87762	22539	352	144	8	5.55556	1.90885	367|687|1750|3148|3202|3397|4831|6662	AR|KLF9|DLX6|HMGB2|HOXA5|ID1|NME2|SOX9	-1.55601	HCV_related
GO Biological Processes	19	GO:0045616	regulation of keratinocyte differentiation	-2.70503	12.0401	5.5332	22539	39	144	3	2.08333	1.19022	3204|4831|10626	HOXA7|NME2|TRIM16	-1.55328	HCV_related
GO Biological Processes	19	GO:0030178	negative regulation of Wnt signaling pathway	-2.70448	4.62623	4.16164	22539	203	144	6	4.16667	1.66522	1649|1958|6662|9968|10042|51176	DDIT3|EGR1|SOX9|MED12|HMGXB4|LEF1	-1.55304	HCV_related
GO Biological Processes	19	GO:0036294	cellular response to decreased oxygen levels	-2.68311	4.5811	4.13022	22539	205	144	6	4.16667	1.66522	1788|1958|2627|6095|10891|83990	DNMT3A|EGR1|GATA6|RORA|PPARGC1A|BRIP1	-1.53481	HCV_related
Reactome Gene Sets	6	R-HSA-381340	Transcriptional regulation of white adipocyte differentiation	-2.68286	7.45337	4.75153	22539	84	144	4	2.77778	1.36946	6604|9611|9968|10891	SMARCD3|NCOR1|MED12|PPARGC1A	-1.53481	HCV_related
GO Biological Processes	19	GO:0048644	muscle organ morphogenesis	-2.68286	7.45337	4.75153	22539	84	144	4	2.77778	1.36946	4092|23414|23493|55636	SMAD7|ZFPM2|HEY2|CHD7	-1.53481	HCV_related
GO Biological Processes	19	GO:1901863	positive regulation of muscle tissue development	-2.68286	7.45337	4.75153	22539	84	144	4	2.77778	1.36946	2627|10891|23414|23493	GATA6|PPARGC1A|ZFPM2|HEY2	-1.53481	HCV_related
GO Biological Processes	19	GO:0072073	kidney epithelium development	-2.68281	5.59003	4.36846	22539	140	144	5	3.47222	1.52563	4091|4092|6299|6662|6943	SMAD6|SMAD7|SALL1|SOX9|TCF21	-1.53481	HCV_related
Canonical Pathways	11	M176	PID FOXM1 PATHWAY	-2.6732	11.7391	5.45102	22539	40	144	3	2.08333	1.19022	2099|2305|2353	ESR1|FOXM1|FOS	-1.52818	HCV_related
GO Biological Processes	19	GO:0071364	cellular response to epidermal growth factor stimulus	-2.6732	11.7391	5.45102	22539	40	144	3	2.08333	1.19022	3397|4176|6662	ID1|MCM7|SOX9	-1.52818	HCV_related
GO Biological Processes	19	GO:0033046	negative regulation of sister chromatid segregation	-2.6732	11.7391	5.45102	22539	40	144	3	2.08333	1.19022	9232|9319|9700	PTTG1|TRIP13|ESPL1	-1.52818	HCV_related
GO Biological Processes	19	GO:0042181	ketone biosynthetic process	-2.6732	11.7391	5.45102	22539	40	144	3	2.08333	1.19022	1958|10891|23408	EGR1|PPARGC1A|SIRT5	-1.52818	HCV_related
GO Biological Processes	19	GO:2000241	regulation of reproductive process	-2.66933	5.55038	4.34627	22539	141	144	5	3.47222	1.52563	367|2099|6662|23414|64750	AR|ESR1|SOX9|ZFPM2|SMURF2	-1.52522	HCV_related
GO Biological Processes	19	GO:1903707	negative regulation of hemopoiesis	-2.66933	5.55038	4.34627	22539	141	144	5	3.47222	1.52563	3149|3202|3204|4092|9935	HMGB3|HOXA5|HOXA7|SMAD7|MAFB	-1.52522	HCV_related
Reactome Gene Sets	6	R-HSA-68874	M/G1 Transition	-2.66406	7.36569	4.71489	22539	85	144	4	2.77778	1.36946	4171|4172|4173|4176	MCM2|MCM3|MCM4|MCM7	-1.52146	HCV_related
Reactome Gene Sets	6	R-HSA-69002	DNA Replication Pre-Initiation	-2.66406	7.36569	4.71489	22539	85	144	4	2.77778	1.36946	4171|4172|4173|4176	MCM2|MCM3|MCM4|MCM7	-1.52146	HCV_related
GO Biological Processes	19	GO:0071417	cellular response to organonitrogen compound	-2.65808	2.95322	3.64883	22539	530	144	10	6.94444	2.1184	1788|1958|2146|3066|3397|6599|6662|9971|10891|83990	DNMT3A|EGR1|EZH2|HDAC2|ID1|SMARCC1|SOX9|NR1H4|PPARGC1A|BRIP1	-1.51866	HCV_related
GO Biological Processes	19	GO:0006281	DNA repair	-2.65808	2.95322	3.64883	22539	530	144	10	6.94444	2.1184	580|1643|2305|3148|4869|7158|8091|9232|9319|83990	BARD1|DDB2|FOXM1|HMGB2|NPM1|TP53BP1|HMGA2|PTTG1|TRIP13|BRIP1	-1.51866	HCV_related
GO Biological Processes	19	GO:0045746	negative regulation of Notch signaling pathway	-2.64222	11.4527	5.37172	22539	41	144	3	2.08333	1.19022	4854|23462|23493	NOTCH3|HEY1|HEY2	-1.5074	HCV_related
GO Biological Processes	19	GO:0051985	negative regulation of chromosome segregation	-2.64222	11.4527	5.37172	22539	41	144	3	2.08333	1.19022	9232|9319|9700	PTTG1|TRIP13|ESPL1	-1.5074	HCV_related
GO Biological Processes	19	GO:0010717	regulation of epithelial to mesenchymal transition	-2.6272	7.19636	4.64336	22539	87	144	4	2.77778	1.36946	2146|3066|4092|51176	EZH2|HDAC2|SMAD7|LEF1	-1.49445	HCV_related
GO Biological Processes	19	GO:0045638	negative regulation of myeloid cell differentiation	-2.6272	7.19636	4.64336	22539	87	144	4	2.77778	1.36946	3149|3202|3204|9935	HMGB3|HOXA5|HOXA7|MAFB	-1.49445	HCV_related
GO Biological Processes	19	GO:0019216	regulation of lipid metabolic process	-2.6187	3.44002	3.76336	22539	364	144	8	5.55556	1.90885	1958|5934|6095|6604|9611|9971|10891|23541	EGR1|RBL2|RORA|SMARCD3|NCOR1|NR1H4|PPARGC1A|SEC14L2	-1.48743	HCV_related
GO Biological Processes	19	GO:0030902	hindbrain development	-2.61652	5.39727	4.25956	22539	145	144	5	3.47222	1.52563	2146|6095|9935|10891|51176	EZH2|RORA|MAFB|PPARGC1A|LEF1	-1.48555	HCV_related
Reactome Gene Sets	6	R-HSA-749476	RNA Polymerase III Abortive And Retractive Initiation	-2.61205	11.1801	5.29512	22539	42	144	3	2.08333	1.19022	9328|9329|10623	GTF3C5|GTF3C4|POLR3C	-1.48225	HCV_related
Canonical Pathways	11	M181	PID BMP PATHWAY	-2.61205	11.1801	5.29512	22539	42	144	3	2.08333	1.19022	4091|4092|64750	SMAD6|SMAD7|SMURF2	-1.48225	HCV_related
GO Biological Processes	19	GO:0032732	positive regulation of interleukin-1 production	-2.61205	11.1801	5.29512	22539	42	144	3	2.08333	1.19022	1958|3066|10626	EGR1|HDAC2|TRIM16	-1.48225	HCV_related
Reactome Gene Sets	6	R-HSA-74158	RNA Polymerase III Transcription	-2.61205	11.1801	5.29512	22539	42	144	3	2.08333	1.19022	9328|9329|10623	GTF3C5|GTF3C4|POLR3C	-1.48225	HCV_related
GO Biological Processes	19	GO:0048709	oligodendrocyte differentiation	-2.60912	7.11458	4.60844	22539	88	144	4	2.77778	1.36946	3066|6662|9968|79885	HDAC2|SOX9|MED12|HDAC11	-1.47991	HCV_related
GO Biological Processes	19	GO:1901861	regulation of muscle tissue development	-2.60359	5.3603	4.23838	22539	146	144	5	3.47222	1.52563	2627|10891|23414|23493|51176	GATA6|PPARGC1A|ZFPM2|HEY2|LEF1	-1.47554	HCV_related
GO Biological Processes	19	GO:0045132	meiotic chromosome segregation	-2.59128	7.03464	4.57406	22539	89	144	4	2.77778	1.36946	9232|9319|9700|83990	PTTG1|TRIP13|ESPL1|BRIP1	-1.46499	HCV_related
GO Biological Processes	19	GO:0030510	regulation of BMP signaling pathway	-2.59128	7.03464	4.57406	22539	89	144	4	2.77778	1.36946	2627|4091|4092|64750	GATA6|SMAD6|SMAD7|SMURF2	-1.46499	HCV_related
GO Biological Processes	19	GO:0001656	metanephros development	-2.59128	7.03464	4.57406	22539	89	144	4	2.77778	1.36946	1958|6299|6662|6943	EGR1|SALL1|SOX9|TCF21	-1.46499	HCV_related
GO Biological Processes	19	GO:0009743	response to carbohydrate	-2.59001	4.38843	3.99368	22539	214	144	6	4.16667	1.66522	1958|6597|8431|9971|10891|23394	EGR1|SMARCA4|NR0B2|NR1H4|PPARGC1A|ADNP	-1.46429	HCV_related
GO Biological Processes	19	GO:0006302	double-strand break repair	-2.59001	4.38843	3.99368	22539	214	144	6	4.16667	1.66522	580|2305|7158|8091|9319|83990	BARD1|FOXM1|TP53BP1|HMGA2|TRIP13|BRIP1	-1.46429	HCV_related
GO Biological Processes	19	GO:0009798	axis specification	-2.57367	6.95648	4.54021	22539	90	144	4	2.77778	1.36946	1649|2114|4091|23493	DDIT3|ETS2|SMAD6|HEY2	-1.45114	HCV_related
GO Biological Processes	19	GO:0001892	embryonic placenta development	-2.57367	6.95648	4.54021	22539	90	144	4	2.77778	1.36946	23462|23493|51176|79733	HEY1|HEY2|LEF1|E2F8	-1.45114	HCV_related
GO Biological Processes	19	GO:0016579	protein deubiquitination	-2.56548	3.76511	3.80694	22539	291	144	7	4.86111	1.79211	367|580|1643|2099|4092|8464|64750	AR|BARD1|DDB2|ESR1|SMAD7|SUPT3H|SMURF2	-1.44496	HCV_related
GO Biological Processes	19	GO:1902106	negative regulation of leukocyte differentiation	-2.55628	6.88004	4.50687	22539	91	144	4	2.77778	1.36946	3149|3204|4092|9935	HMGB3|HOXA7|SMAD7|MAFB	-1.43605	HCV_related
Canonical Pathways	11	M285	PID HNF3A PATHWAY	-2.55402	10.6719	5.14941	22539	44	144	3	2.08333	1.19022	367|2099|2353	AR|ESR1|FOS	-1.4355	HCV_related
GO Biological Processes	19	GO:0070849	response to epidermal growth factor	-2.55402	10.6719	5.14941	22539	44	144	3	2.08333	1.19022	3397|4176|6662	ID1|MCM7|SOX9	-1.4355	HCV_related
GO Biological Processes	19	GO:0031018	endocrine pancreas development	-2.55402	10.6719	5.14941	22539	44	144	3	2.08333	1.19022	2627|5991|6662	GATA6|RFX3|SOX9	-1.4355	HCV_related
GO Biological Processes	19	GO:0016072	rRNA metabolic process	-2.54081	3.72669	3.7736	22539	294	144	7	4.86111	1.79211	6597|6894|9328|9329|22984|55636|64425	SMARCA4|TARBP1|GTF3C5|GTF3C4|PDCD11|CHD7|POLR1E	-1.42543	HCV_related
GO Biological Processes	19	GO:0043010	camera-type eye development	-2.53265	3.71405	3.76259	22539	295	144	7	4.86111	1.79211	3066|4094|6597|6604|6662|7289|55636	HDAC2|MAF|SMARCA4|SMARCD3|SOX9|TULP3|CHD7	-1.41897	HCV_related
GO Biological Processes	19	GO:0016458	gene silencing	-2.53142	3.04911	3.56845	22539	462	144	9	6.25	2.01718	1788|2099|3066|4613|9611|22955|23408|57472|79753	DNMT3A|ESR1|HDAC2|MYCN|NCOR1|SCMH1|SIRT5|CNOT6|SNIP1	-1.41861	HCV_related
GO Biological Processes	19	GO:0055023	positive regulation of cardiac muscle tissue growth	-2.52607	10.4347	5.08002	22539	45	144	3	2.08333	1.19022	2627|23414|23493	GATA6|ZFPM2|HEY2	-1.41492	HCV_related
GO Biological Processes	19	GO:0007568	aging	-2.52454	3.70151	3.75162	22539	296	144	7	4.86111	1.79211	1788|2305|2353|4869|6940|8091|10891	DNMT3A|FOXM1|FOS|NPM1|ZNF354A|HMGA2|PPARGC1A	-1.41417	HCV_related
GO Biological Processes	19	GO:0071453	cellular response to oxygen levels	-2.52087	4.24943	3.8926	22539	221	144	6	4.16667	1.66522	1788|1958|2627|6095|10891|83990	DNMT3A|EGR1|GATA6|RORA|PPARGC1A|BRIP1	-1.41224	HCV_related
GO Biological Processes	19	GO:0030217	T cell differentiation	-2.51121	4.23029	3.8785	22539	222	144	6	4.16667	1.66522	1958|4092|6095|9935|51176|55636	EGR1|SMAD7|RORA|MAFB|LEF1|CHD7	-1.40426	HCV_related
GO Biological Processes	19	GO:0048806	genitalia development	-2.4988	10.2079	5.01278	22539	46	144	3	2.08333	1.19022	367|2099|55636	AR|ESR1|CHD7	-1.39379	HCV_related
GO Biological Processes	19	GO:0002067	glandular epithelial cell differentiation	-2.4988	10.2079	5.01278	22539	46	144	3	2.08333	1.19022	2627|3202|5991	GATA6|HOXA5|RFX3	-1.39379	HCV_related
GO Biological Processes	19	GO:0090102	cochlea development	-2.4988	10.2079	5.01278	22539	46	144	3	2.08333	1.19022	4171|6662|23493	MCM2|SOX9|HEY2	-1.39379	HCV_related
GO Biological Processes	19	GO:0045646	regulation of erythrocyte differentiation	-2.4988	10.2079	5.01278	22539	46	144	3	2.08333	1.19022	3148|3202|9935	HMGB2|HOXA5|MAFB	-1.39379	HCV_related
GO Biological Processes	19	GO:0104004	cellular response to environmental stimulus	-2.49242	3.65215	3.70822	22539	300	144	7	4.86111	1.79211	1643|1958|4869|6662|7158|8091|22927	DDB2|EGR1|NPM1|SOX9|TP53BP1|HMGA2|HABP4	-1.38824	HCV_related
GO Biological Processes	19	GO:0071214	cellular response to abiotic stimulus	-2.49242	3.65215	3.70822	22539	300	144	7	4.86111	1.79211	1643|1958|4869|6662|7158|8091|22927	DDB2|EGR1|NPM1|SOX9|TP53BP1|HMGA2|HABP4	-1.38824	HCV_related
Reactome Gene Sets	6	R-HSA-1592230	Mitochondrial biogenesis	-2.48883	6.59035	4.37839	22539	95	144	4	2.77778	1.36946	6604|9611|10891|23408	SMARCD3|NCOR1|PPARGC1A|SIRT5	-1.3852	HCV_related
KEGG Pathway	24	hsa01522	Endocrine resistance	-2.47247	6.5217	4.34742	22539	96	144	4	2.77778	1.36946	2099|2353|4854|9611	ESR1|FOS|NOTCH3|NCOR1	-1.37294	HCV_related
Canonical Pathways	11	M60	PID NFAT TFPATHWAY	-2.47217	9.99069	4.94756	22539	47	144	3	2.08333	1.19022	1958|2353|4094	EGR1|FOS|MAF	-1.37294	HCV_related
Canonical Pathways	11	M87	PID LKB1 PATHWAY	-2.47217	9.99069	4.94756	22539	47	144	3	2.08333	1.19022	2099|2118|6604	ESR1|ETV4|SMARCD3	-1.37294	HCV_related
GO Biological Processes	19	GO:0060976	coronary vasculature development	-2.47217	9.99069	4.94756	22539	47	144	3	2.08333	1.19022	2627|4091|23493	GATA6|SMAD6|HEY2	-1.37294	HCV_related
GO Biological Processes	19	GO:0045599	negative regulation of fat cell differentiation	-2.47217	9.99069	4.94756	22539	47	144	3	2.08333	1.19022	1649|6095|23414	DDIT3|RORA|ZFPM2	-1.37294	HCV_related
GO Biological Processes	19	GO:0032330	regulation of chondrocyte differentiation	-2.47217	9.99069	4.94756	22539	47	144	3	2.08333	1.19022	4094|6662|7227	MAF|SOX9|TRPS1	-1.37294	HCV_related
GO Biological Processes	19	GO:0098727	maintenance of cell number	-2.4679	4.98474	4.01757	22539	157	144	5	3.47222	1.52563	2146|6299|6662|8091|9968	EZH2|SALL1|SOX9|HMGA2|MED12	-1.36894	HCV_related
GO Biological Processes	19	GO:0042472	inner ear morphogenesis	-2.45631	6.45447	4.31689	22539	97	144	4	2.77778	1.36946	1750|6662|9935|55636	DLX6|SOX9|MAFB|CHD7	-1.36034	HCV_related
GO Biological Processes	19	GO:0010718	positive regulation of epithelial to mesenchymal transition	-2.44616	9.78255	4.88428	22539	48	144	3	2.08333	1.19022	2146|3066|51176	EZH2|HDAC2|LEF1	-1.35182	HCV_related
GO Biological Processes	19	GO:0060711	labyrinthine layer development	-2.44616	9.78255	4.88428	22539	48	144	3	2.08333	1.19022	23462|23493|51176	HEY1|HEY2|LEF1	-1.35182	HCV_related
GO Biological Processes	19	GO:0070646	protein modification by small protein removal	-2.44526	3.58054	3.64448	22539	306	144	7	4.86111	1.79211	367|580|1643|2099|4092|8464|64750	AR|BARD1|DDB2|ESR1|SMAD7|SUPT3H|SMURF2	-1.35146	HCV_related
GO Biological Processes	19	GO:0034248	regulation of cellular amide metabolic process	-2.4438	2.59688	3.34663	22539	663	144	11	7.63889	2.21349	2099|4613|4869|6949|8864|9611|9971|10657|22927|57472|79753	ESR1|MYCN|NPM1|TCOF1|PER2|NCOR1|NR1H4|KHDRBS1|HABP4|CNOT6|SNIP1	-1.35081	HCV_related
GO Biological Processes	19	GO:0002062	chondrocyte differentiation	-2.44034	6.38861	4.28679	22539	98	144	4	2.77778	1.36946	4094|6662|7227|8091	MAF|SOX9|TRPS1|HMGA2	-1.34923	HCV_related
GO Biological Processes	19	GO:0042752	regulation of circadian rhythm	-2.44034	6.38861	4.28679	22539	98	144	4	2.77778	1.36946	2146|6095|8864|10891	EZH2|RORA|PER2|PPARGC1A	-1.34923	HCV_related
GO Biological Processes	19	GO:0003300	cardiac muscle hypertrophy	-2.44034	6.38861	4.28679	22539	98	144	4	2.77778	1.36946	2146|2627|3066|23493	EZH2|GATA6|HDAC2|HEY2	-1.34923	HCV_related
Reactome Gene Sets	6	R-HSA-5693607	Processing of DNA double-strand break ends	-2.44034	6.38861	4.28679	22539	98	144	4	2.77778	1.36946	580|6047|7158|83990	BARD1|RNF4|TP53BP1|BRIP1	-1.34923	HCV_related
Reactome Gene Sets	6	R-HSA-9012852	Signaling by NOTCH3	-2.42074	9.58291	4.82282	22539	49	144	3	2.08333	1.19022	4854|23462|23493	NOTCH3|HEY1|HEY2	-1.3323	HCV_related
GO Biological Processes	19	GO:0061383	trabecula morphogenesis	-2.42074	9.58291	4.82282	22539	49	144	3	2.08333	1.19022	23462|23493|55636	HEY1|HEY2|CHD7	-1.3323	HCV_related
GO Biological Processes	19	GO:0060421	positive regulation of heart growth	-2.42074	9.58291	4.82282	22539	49	144	3	2.08333	1.19022	2627|23414|23493	GATA6|ZFPM2|HEY2	-1.3323	HCV_related
GO Biological Processes	19	GO:0072132	mesenchyme morphogenesis	-2.42074	9.58291	4.82282	22539	49	144	3	2.08333	1.19022	6662|23462|51176	SOX9|HEY1|LEF1	-1.3323	HCV_related
GO Biological Processes	19	GO:0007276	gamete generation	-2.41933	2.57744	3.31871	22539	668	144	11	7.63889	2.21349	367|1788|3148|6595|6662|9232|9319|10657|22955|51742|83990	AR|DNMT3A|HMGB2|SMARCA2|SOX9|PTTG1|TRIP13|KHDRBS1|SCMH1|ARID4B|BRIP1	-1.33143	HCV_related
GO Biological Processes	19	GO:0014897	striated muscle hypertrophy	-2.40895	6.26083	4.22782	22539	100	144	4	2.77778	1.36946	2146|2627|3066|23493	EZH2|GATA6|HDAC2|HEY2	-1.32264	HCV_related
Reactome Gene Sets	6	R-HSA-69239	Synthesis of DNA	-2.40895	6.26083	4.22782	22539	100	144	4	2.77778	1.36946	4171|4172|4173|4176	MCM2|MCM3|MCM4|MCM7	-1.32264	HCV_related
GO Biological Processes	19	GO:0009991	response to extracellular stimulus	-2.399	2.91051	3.40708	22539	484	144	9	6.25	2.01718	1649|1788|2353|6940|9971|10891|23394|23408|83990	DDIT3|DNMT3A|FOS|ZNF354A|NR1H4|PPARGC1A|ADNP|SIRT5|BRIP1	-1.31361	HCV_related
GO Biological Processes	19	GO:0007519	skeletal muscle tissue development	-2.3986	4.80125	3.90564	22539	163	144	5	3.47222	1.52563	1958|2353|3131|6943|9328	EGR1|FOS|HLF|TCF21|GTF3C5	-1.31361	HCV_related
GO Biological Processes	19	GO:0098781	ncRNA transcription	-2.39353	6.19884	4.19893	22539	101	144	4	2.77778	1.36946	6597|9328|9329|64425	SMARCA4|GTF3C5|GTF3C4|POLR1E	-1.31039	HCV_related
GO Biological Processes	19	GO:0060070	canonical Wnt signaling pathway	-2.39174	3.50047	3.57212	22539	313	144	7	4.86111	1.79211	1649|1958|6662|8629|9968|51176|64750	DDIT3|EGR1|SOX9|JRK|MED12|LEF1|SMURF2	-1.30939	HCV_related
GO Biological Processes	19	GO:0014896	muscle hypertrophy	-2.37828	6.13807	4.17043	22539	102	144	4	2.77778	1.36946	2146|2627|3066|23493	EZH2|GATA6|HDAC2|HEY2	-1.29698	HCV_related
GO Biological Processes	19	GO:0009948	anterior/posterior axis specification	-2.37157	9.20711	4.70504	22539	51	144	3	2.08333	1.19022	1649|2114|23493	DDIT3|ETS2|HEY2	-1.29341	HCV_related
GO Biological Processes	19	GO:0030514	negative regulation of BMP signaling pathway	-2.37157	9.20711	4.70504	22539	51	144	3	2.08333	1.19022	4091|4092|64750	SMAD6|SMAD7|SMURF2	-1.29341	HCV_related
GO Biological Processes	19	GO:0002763	positive regulation of myeloid leukocyte differentiation	-2.37157	9.20711	4.70504	22539	51	144	3	2.08333	1.19022	2353|10456|51176	FOS|HAX1|LEF1	-1.29341	HCV_related
GO Biological Processes	19	GO:0031497	chromatin assembly	-2.35408	4.68625	3.83402	22539	167	144	5	3.47222	1.52563	3148|4171|4869|6662|8091	HMGB2|MCM2|NPM1|SOX9|HMGA2	-1.27843	HCV_related
GO Biological Processes	19	GO:0010965	regulation of mitotic sister chromatid separation	-2.34777	9.03005	4.64855	22539	52	144	3	2.08333	1.19022	9232|9319|9700	PTTG1|TRIP13|ESPL1	-1.27299	HCV_related
GO Biological Processes	19	GO:0042093	T-helper cell differentiation	-2.34777	9.03005	4.64855	22539	52	144	3	2.08333	1.19022	4092|6095|51176	SMAD7|RORA|LEF1	-1.27299	HCV_related
GO Biological Processes	19	GO:0051147	regulation of muscle cell differentiation	-2.32152	4.60355	3.78177	22539	170	144	5	3.47222	1.52563	2146|6604|6929|22954|23493	EZH2|SMARCD3|TCF3|TRIM32|HEY2	-1.25008	HCV_related
GO Biological Processes	19	GO:0071478	cellular response to radiation	-2.32152	4.60355	3.78177	22539	170	144	5	3.47222	1.52563	1643|1958|4869|7158|8091	DDB2|EGR1|NPM1|TP53BP1|HMGA2	-1.25008	HCV_related
Reactome Gene Sets	6	R-HSA-427413	NoRC negatively regulates rRNA expression	-2.31896	5.90645	4.06013	22539	106	144	4	2.77778	1.36946	3066|10284|51742|64425	HDAC2|SAP18|ARID4B|POLR1E	-1.24829	HCV_related
GO Biological Processes	19	GO:0060538	skeletal muscle organ development	-2.31083	4.57663	3.76463	22539	171	144	5	3.47222	1.52563	1958|2353|3131|6943|9328	EGR1|FOS|HLF|TCF21|GTF3C5	-1.24143	HCV_related
GO Biological Processes	19	GO:0051306	mitotic sister chromatid separation	-2.30167	8.6956	4.54001	22539	54	144	3	2.08333	1.19022	9232|9319|9700	PTTG1|TRIP13|ESPL1	-1.23533	HCV_related
GO Biological Processes	19	GO:0060563	neuroepithelial cell differentiation	-2.30167	8.6956	4.54001	22539	54	144	3	2.08333	1.19022	4613|23493|51176	MYCN|HEY2|LEF1	-1.23533	HCV_related
[truncated: 241 more rows]
