# Supplementary material for: Discovering master regulators in hepatocellular carcinoma: one novel MR, SEC14L2 inhibits cancer cells
Source: Aging (Albany NY). 2019 Dec 18;11(24):12375–411. doi: 10.18632/aging.102579 (PMC6949064; doi:10.18632/aging.102579)
Supplement: Supplementary Table 6 [file aging-11-102579-s008..xlsx]

## Sheet: Regulon
MR	regulons.and.pheno	regulons.and.mode	Targets	GeneID	FC	AveExpr	t	P.Value	adj.P.Val	B	RefSeq mRNA ID
ESR1	4.01253	-0.155574	SPINK1	6690	4.01253	8.65708	-13.713	3.34975e-41	6.53742e-40	82.6538	NM_003122
ESR1	3.92602	-0.214394	GPC3	2719	3.92602	7.45869	-18.1419	7.29381e-69	1.35777e-66	145.904	NM_004484
ESR1	2.76313	-0.309317	PTTG1	9232	2.76313	6.82399	-19.8244	6.8537e-81	4.87822e-78	173.433	NM_004219
ESR1	2.67674	-0.329297	TOP2A	7153	2.67674	6.04156	-19.2573	9.45195e-77	3.81229e-74	163.956	NM_001067
ESR1	2.57759	-0.31462	ASPM	259266	2.57759	6.13003	-18.8628	6.37554e-74	2.14289e-71	157.481	NM_018136
ESR1	2.5208	-0.154875	ACSL4	2182	2.5208	6.83393	-17.5776	5.24528e-65	6.9745e-63	137.079	NM_022977
ESR1	2.35632	-0.103432	S100P	6286	2.35632	5.64393	-11.4121	2.2007e-29	2.02498e-28	55.6916	NM_005980
ESR1	2.00134	-0.11015	COL4A1	1282	2.00134	8.62519	-19.1918	2.80687e-76	1.06135e-73	162.874	NM_001845
ESR1	1.96465	-0.114021	PLVAP	83483	1.96465	6.56477	-18.5059	2.12149e-71	5.134e-69	151.708	NM_031310
ESR1	1.84382	-0.203965	HSPB1	3315	1.84382	11.3292	-18.6112	3.85818e-72	9.72583e-70	153.403	NM_001540
ESR1	1.76824	-0.150777	SULT1C2	6819	1.76824	5.29267	-12.4542	1.66397e-34	2.1216e-33	67.369	NM_176825
ESR1	1.74308	-0.229897	PEA15	8682	1.74308	8.63111	-20.7575	6.95385e-88	1.68283e-84	189.445	NM_003768
ESR1	1.64113	-0.132298	CLGN	1047	1.64113	5.14307	-10.7321	2.96537e-26	2.25383e-25	48.5636	NM_004362
ESR1	1.61181	-0.134391	STK39	27347	1.61181	6.13465	-11.8491	1.74632e-31	1.80602e-30	60.4792	NM_013233
ESR1	1.5999	-0.114184	THY1	7070	1.5999	5.9692	-15.2781	2.84649e-50	1.0797e-48	103.38	NM_006288
ESR1	1.59141	-0.298829	CCT3	7203	1.59141	9.88935	-19.5444	7.76546e-79	3.75848e-76	168.73	NM_005998
ESR1	1.57842	-0.264721	SF3B4	10262	1.57842	8.36269	-17.8174	1.23487e-66	1.82218e-64	140.804	NM_005850
ESR1	1.56234	-0.229115	ACLY	47	1.56234	7.91273	-19.7596	2.05727e-80	1.26937e-77	172.34	NM_198830
ESR1	1.56161	-0.138413	MID1IP1	58526	1.56161	7.32774	-15.5802	4.09491e-52	1.80833e-50	107.591	NM_021242
ESR1	1.53721	-0.0679695	GBP2	2634	1.53721	8.4678	-13.7355	2.51507e-41	4.9564e-40	82.9381	NM_004120
ESR1	1.50354	-0.142192	ATP6V1C1	528	1.50354	6.43521	-17.2982	3.93718e-63	4.20362e-61	132.788	NM_001695
ESR1	1.50278	-0.233423	PARP1	142	1.50278	8.78706	-18.8707	5.60094e-74	1.93633e-71	157.61	NM_001618
ESR1	1.47519	-0.319559	DDX39A	10212	1.47519	8.01608	-16.8338	4.58862e-60	3.77702e-58	125.773	NM_005804
ESR1	1.4512	-0.136872	GMFB	2764	1.4512	8.45805	-17.566	6.28172e-65	8.17299e-63	136.899	NM_004124
ESR1	1.44699	-0.101114	SPON2	10417	1.44699	8.16705	-12.0385	2.04429e-32	2.24872e-31	62.6034	NM_012445
ESR1	1.42185	-0.162287	CPD	1362	1.42185	8.01061	-13.046	1.38553e-37	2.12215e-36	74.3965	NM_001304
ESR1	1.4105	-0.165891	WDYHV1	55093	1.4105	6.58749	-14.0515	4.28777e-43	9.62561e-42	86.977	NM_018024
ESR1	1.39817	-0.169645	ATP6AP1	537	1.39817	9.32354	-14.8062	1.88002e-47	5.84786e-46	96.9344	NM_001183
ESR1	1.3581	-0.0662865	RTL8C	8933	1.3581	8.52907	-12.4081	2.85726e-34	3.59759e-33	66.8334	NM_001078171
ESR1	1.35458	-0.175071	RAD21	5885	1.35458	8.92127	-12.5505	5.35155e-35	7.06148e-34	68.493	NM_006265
ESR1	1.35362	-0.203335	INTS8	55656	1.35362	7.69404	-11.168	3.057e-28	2.61411e-27	53.0881	NM_017864
ESR1	1.35187	-0.158952	ENAH	55740	1.35187	6.67724	-11.0173	1.51352e-27	1.2416e-26	51.5057	NM_018212
ESR1	1.35155	-0.141012	CFL1	1072	1.35155	10.3857	-17.9253	2.26094e-67	3.64766e-65	142.491	NM_005507
ESR1	1.33826	-0.13945	HSPA4	3308	1.33826	7.28216	-15.6579	1.36052e-52	6.30737e-51	108.685	NM_002154
ESR1	1.33741	-0.257504	MPZL1	9019	1.33741	6.03646	-17.7001	7.7699e-66	1.08442e-63	138.976	NM_024569
ESR1	1.3273	-0.0813548	FKBP11	51303	1.3273	8.68984	-10.857	8.12397e-27	6.36658e-26	49.8438	NM_016594
ESR1	1.32556	-0.109925	WFS1	7466	1.32556	6.31005	-11.1922	2.35963e-28	2.03069e-27	53.3443	NM_006005
ESR1	1.28837	-0.0582546	CA12	771	1.28837	4.6219	-9.32306	2.55969e-20	1.37471e-19	35.0659	NM_206925
ESR1	1.28489	-0.150576	PLCB1	23236	1.28489	5.17278	-14.5003	1.15584e-45	3.1218e-44	92.8469	NM_182734
ESR1	1.27985	-0.135815	SCRIB	23513	1.27985	6.66366	-9.73045	5.87524e-22	3.51584e-21	38.7894	NM_182706
ESR1	1.27411	-0.177299	UBE2Z	65264	1.27411	7.27289	-14.8964	5.50106e-48	1.76092e-46	98.1542	NM_023079
ESR1	1.27303	-0.136889	OSBPL3	26031	1.27303	5.30166	-9.95404	6.95881e-23	4.37411e-22	40.8953	NM_145322
ESR1	1.26585	-0.148169	PTK2	5747	1.26585	7.55782	-12.2747	1.3517e-33	1.62904e-32	65.2938	NM_153831
ESR1	1.26108	-0.176319	TPD52L2	7165	1.26108	7.5757	-10.7825	1.76108e-26	1.36247e-25	49.0788	NM_199363
ESR1	1.25229	-0.118871	HRAS	3265	1.25229	6.33948	-11.7166	7.69977e-31	7.71251e-30	59.0103	NM_176795
ESR1	1.24977	-0.127163	RBCK1	10616	1.24977	7.45798	-11.632	1.96886e-30	1.91813e-29	58.0809	NM_031229
ESR1	1.24419	-0.166762	LASP1	3927	1.24419	10.3849	-12.337	6.55724e-34	8.02483e-33	66.0104	NM_006148
ESR1	1.24365	-0.068938	DDIT3	1649	1.24365	6.95898	-9.49927	5.09271e-21	2.84496e-20	36.6584	NM_004083
ESR1	1.23783	-0.0644529	TRIM31	11074	1.23783	4.34551	-11.4177	2.07021e-29	1.90781e-28	55.7521	NM_007028
ESR1	1.20893	-0.121676	ARMC1	55156	1.20893	8.43267	-8.25665	2.49139e-16	1.0626e-15	26.0227	NM_018120
ESR1	1.19345	-0.0852095	RBM3	5935	1.19345	6.97665	-9.87438	1.49557e-22	9.23755e-22	40.14	NM_006743
ESR1	1.18907	-0.114317	WSB2	55884	1.18907	8.87706	-7.44435	1.36805e-13	4.99649e-13	19.8295	NM_018639
ESR1	1.16446	-0.127332	MCAM	4162	1.16446	5.83319	-9.44442	8.44336e-21	4.64807e-20	36.1597
ESR1	1.15908	-0.159446	SUCO	51430	1.15908	7.36449	-6.24834	4.92534e-10	1.43192e-09	11.8278	NM_016227
ESR1	1.15865	-0.110962	SLC26A2	1836	1.15865	5.4024	-5.95914	2.92518e-09	8.06441e-09	10.0954	NM_000112
ESR1	1.1333	-0.118832	UXS1	80146	1.1333	7.15795	-5.72527	1.1671e-08	3.08071e-08	8.75273	NM_025076
ESR1	1.10356	-0.116961	SNORA6	574040	1.10356	10.2732	-6.84776	9.58583e-12	3.11546e-11	15.6703
ESR1	-0.997123	0.0507335	PITPNM3	83394	-0.997123	4.02493	-0.324134	0.745866	0.780505	-7.42442	NM_031220
ESR1	-1.0284	0.0220262	LGI1	9211	-1.0284	3.98713	5.10692	3.54265e-07	8.41997e-07	5.455	NM_005097
ESR1	-1.02931	0.0862279	DPF3	8110	-1.02931	4.24755	3.01172	0.00262596	0.00428281	-2.96277	NM_012074
ESR1	-1.05747	0.0659452	GDF2	2658	-1.05747	4.16062	6.23981	5.19696e-10	1.50835e-09	11.7755	NM_016204
ESR1	-1.05777	0.137338	EPM2A	7957	-1.05777	4.77396	6.9556	4.55555e-12	1.51185e-11	16.3975	NM_005670
ESR1	-1.06367	0.0554303	EPHB1	2047	-1.06367	4.07181	6.31768	3.17627e-10	9.3465e-10	12.2549	NM_004441
ESR1	-1.07585	0.0169625	GRIA3	2892	-1.07585	4.29762	6.6153	4.59421e-11	1.42978e-10	14.1399	NM_007325
ESR1	-1.08688	0.0419565	REPS1	85021	-1.08688	5.44981	7.22618	6.72111e-13	2.3403e-12	18.27	NM_031922
ESR1	-1.08987	0.0752934	PDSS2	57107	-1.08987	5.97196	7.25693	5.38459e-13	1.89015e-12	18.4871	NM_020381
ESR1	-1.10415	0.0807158	C21orf91	54149	-1.10415	5.14878	6.22455	5.71962e-10	1.65607e-09	11.6822	NM_017447
ESR1	-1.13166	0.0215785	PPBP	5473	-1.13166	4.3501	7.86936	5.4336e-15	2.15562e-14	22.9942	NM_002704
ESR1	-1.13711	0.0689265	NDST3	9348	-1.13711	4.10363	13.0924	7.84616e-38	1.21872e-36	74.9602	NM_004784
ESR1	-1.15052	0.0744311	MPPED1	758	-1.15052	4.92802	8.43363	5.82249e-17	2.5675e-16	27.4523	NM_001044370
ESR1	-1.15075	0.0912965	KCNMA1	3778	-1.15075	4.89447	11.7647	4.50076e-31	4.56107e-30	59.5419	NM_002247
ESR1	-1.15272	0.114129	SAMD4A	23034	-1.15272	5.4876	12.0442	1.91585e-32	2.1132e-31	62.6676	NM_015589
ESR1	-1.15358	0.0839929	IFNAR1	3454	-1.15358	6.02379	8.97097	5.93772e-19	2.95786e-18	31.9669	NM_000629
ESR1	-1.17496	0.0615348	DNALI1	7802	-1.17496	5.36776	7.96588	2.55262e-15	1.03197e-14	23.7361	NM_003462
ESR1	-1.17532	0.129589	PDE7B	27115	-1.17532	4.58592	10.3151	2.02677e-24	1.38319e-23	44.3881	NM_018945
ESR1	-1.17949	0.100127	ADCY1	107	-1.17949	4.56908	11.0059	1.70759e-27	1.39985e-26	51.3864	NM_021116
ESR1	-1.19211	0.110441	DDX19B	11269	-1.19211	5.90381	12.4909	1.08088e-34	1.38987e-33	67.7965	NM_007242
ESR1	-1.19425	0.116734	KLRF1	51348	-1.19425	4.40019	10.4672	4.41572e-25	3.12823e-24	45.8939	NM_016523
ESR1	-1.20367	0.139895	TM6SF2	53345	-1.20367	5.23874	9.21468	6.8164e-20	3.5705e-19	34.1002	NM_001001524
ESR1	-1.20453	0.160244	SMAD6	4091	-1.20453	5.28	15.834	1.10053e-53	5.50267e-52	111.182	NM_005585
ESR1	-1.22006	0.12699	FXN	2395	-1.22006	6.14919	10.6123	1.01299e-25	7.44216e-25	47.3491	NM_181425
ESR1	-1.25198	0.21271	GNAO1	2775	-1.25198	4.72538	17.9704	1.10857e-67	1.8375e-65	143.199	NM_138736
ESR1	-1.2526	0.141737	ANKRD55	79722	-1.2526	4.24044	12.2375	2.08113e-33	2.47364e-32	64.8663	NM_024669
ESR1	-1.26296	0.0856269	TENM1	10178	-1.26296	5.55821	6.22798	5.59783e-10	1.62236e-09	11.7032	NM_014253
ESR1	-1.29217	0.135481	CCDC28A	25901	-1.29217	8.68762	12.3369	6.55914e-34	8.02483e-33	66.0101	NM_015439
ESR1	-1.29676	0.0590557	LGSN	51557	-1.29676	4.93096	7.3598	2.5483e-13	9.13614e-13	19.2199	NM_016571
ESR1	-1.297	0.108465	NCOR1	9611	-1.297	6.64978	13.115	5.94604e-38	9.27153e-37	75.2351	NM_006311
ESR1	-1.30402	0.151494	PXDC1	221749	-1.30402	8.13894	12.1689	4.59251e-33	5.33295e-32	64.0823	NM_183373
ESR1	-1.31388	0.275572	N4BP2L1	90634	-1.31388	5.84878	15.8299	1.1677e-53	5.81448e-52	111.123	NM_052818
ESR1	-1.34758	0.11072	PPL	5493	-1.34758	6.15299	11.0537	1.03072e-27	8.51307e-27	51.8858	NM_002705
ESR1	-1.35293	0.120233	CD81	975	-1.35293	11.9663	11.4447	1.54269e-29	1.43149e-28	56.0432	NM_004356
ESR1	-1.36126	0.262047	ADRA1A	148	-1.36126	4.65001	17.334	2.26964e-63	2.51951e-61	133.335	NM_033304
ESR1	-1.36815	0.12325	MYOM2	9172	-1.36815	5.04496	15.8684	6.71848e-54	3.44464e-52	111.672	NM_003970
ESR1	-1.37673	0.132278	DIRAS3	9077	-1.37673	4.9107	11.781	3.75189e-31	3.82137e-30	59.722	NM_004675
ESR1	-1.37813	0.208463	NAAA	27163	-1.37813	6.43933	16.1467	1.20014e-55	7.26085e-54	115.669	NM_014435
ESR1	-1.38672	0.241414	RCAN1	1827	-1.38672	6.58766	13.9064	2.80893e-42	5.99871e-41	85.1124	NM_203418
ESR1	-1.39651	0.217717	EPB41L4B	54566	-1.39651	6.50411	15.4421	2.8707e-51	1.19777e-49	105.657	NM_019114
ESR1	-1.42339	0.123534	MAP2K1	5604	-1.42339	8.0736	14.1742	8.63659e-44	2.00581e-42	88.5667	NM_002755
ESR1	-1.42473	0.260414	BCKDHB	594	-1.42473	6.94385	13.2168	1.69733e-38	2.77162e-37	76.478	NM_183050
ESR1	-1.46152	0.110851	PLIN1	5346	-1.46152	5.30348	12.367	4.62174e-34	5.75933e-33	66.3569	NM_002666
ESR1	-1.46958	0.191604	NMRK1	54981	-1.46958	7.48474	17.87	5.40084e-67	8.48703e-65	141.626	NM_017881
ESR1	-1.48145	0.264628	MTHFD1	4522	-1.48145	8.86605	14.3518	8.32574e-45	2.07287e-43	90.8876	NM_005956
ESR1	-1.48979	0.161176	DHODH	1723	-1.48979	5.98225	12.9834	2.97148e-37	4.46645e-36	73.6401	NM_001361
ESR1	-1.49467	0.228798	RETREG1	54463	-1.49467	5.74743	14.0899	2.60047e-43	5.87046e-42	87.4731	NM_019000
ESR1	-1.49896	0.103626	SLC19A3	80704	-1.49896	5.89487	14.4394	2.60556e-45	6.80935e-44	92.0403	NM_025243
ESR1	-1.50121	0.10489	SLC17A1	6568	-1.50121	5.34861	14.6169	2.427e-46	6.81363e-45	94.3958	NM_005074
ESR1	-1.50163	0.145071	PLSCR4	57088	-1.50163	8.57328	13.0812	9.00299e-38	1.39305e-36	74.8238	NM_020353
ESR1	-1.50527	0.087877	IL13RA2	3598	-1.50527	4.93437	10.1753	8.07612e-24	5.34287e-23	43.0223	NM_000640
ESR1	-1.5114	0.126786	SLC16A4	9122	-1.5114	5.8575	12.0716	1.40159e-32	1.56451e-31	62.9772	NM_004696
ESR1	-1.52396	0.152051	NR3C2	4306	-1.52396	6.0927	15.086	4.08097e-49	1.4313e-47	100.736	NM_001354819
ESR1	-1.5556	0.265575	ST3GAL6	10402	-1.5556	6.37607	18.6566	1.84612e-72	4.9992e-70	154.135	NM_006100
ESR1	-1.57471	0.20295	ASPA	443	-1.57471	5.24573	13.9716	1.2095e-42	2.64647e-41	85.9482	NM_001128085
ESR1	-1.57761	0.179313	DBH	1621	-1.57761	4.70254	19.7584	2.09814e-80	1.26937e-77	172.32	NM_000787
ESR1	-1.597	0.273283	ACAA1	30	-1.597	10.2162	15.4018	5.05062e-51	2.06461e-49	105.096	NM_001607
ESR1	-1.59952	0.268759	CPED1	79974	-1.59952	6.23536	16.7881	9.11952e-60	7.35641e-58	125.09	NM_024913
ESR1	-1.60391	0.188433	RNF125	54941	-1.60391	6.75436	13.9222	2.28987e-42	4.91267e-41	85.315	NM_017831
ESR1	-1.60889	0.259772	NR1I2	8856	-1.60889	6.67294	15.5649	5.08182e-52	2.21187e-50	107.376	NM_033013
ESR1	-1.6109	0.179624	CBR4	84869	-1.6109	7.95434	18.6165	3.54063e-72	9.11523e-70	153.488	NM_032783
ESR1	-1.62769	0.27563	ALDH2	217	-1.62769	12.1721	15.9389	2.43554e-54	1.31563e-52	112.68	NM_001204889
ESR1	-1.63332	0.252267	STARD5	80765	-1.63332	5.87212	17.8071	1.45226e-66	2.11715e-64	140.643	NM_181900
ESR1	-1.6494	0.247163	MAN1C1	57134	-1.6494	6.10084	13.6743	5.48255e-41	1.04966e-39	82.1652	NM_020379
ESR1	-1.65643	0.230091	CFP	5199	-1.65643	5.91551	17.8424	8.33542e-67	1.27669e-64	141.195	NM_002621
ESR1	-1.66535	0.157671	CD1D	912	-1.66535	6.04709	14.3256	1.17771e-44	2.90229e-43	90.5435	NM_001766
ESR1	-1.69247	0.19069	GRAMD1C	54762	-1.69247	6.92388	12.4368	2.04176e-34	2.59237e-33	67.1663	NM_017577
ESR1	-1.72763	0.226309	CYP3A43	64816	-1.72763	6.77171	15.1166	2.67671e-49	9.55403e-48	101.155	NM_057096
ESR1	-1.7328	0.147903	GREM2	64388	-1.7328	5.70143	13.9395	1.83065e-42	3.94845e-41	85.5371	NM_022469
ESR1	-1.73561	0.27187	ETFDH	2110	-1.73561	8.60531	15.5209	9.46208e-52	4.05997e-50	106.759	NM_004453
ESR1	-1.74315	0.314701	CPEB3	22849	-1.74315	6.38668	18.4481	5.39833e-71	1.25615e-68	150.78	NM_014912
ESR1	-1.75037	0.207698	CETP	1071	-1.75037	5.45748	15.5702	4.7115e-52	2.06555e-50	107.451	NM_001286085
ESR1	-1.75217	0.182581	ASS1	445	-1.75217	11.8449	16.9211	1.23128e-60	1.04919e-58	127.08	NM_054012
ESR1	-1.75542	0.29517	KDM8	79831	-1.75542	5.6403	19.7476	2.51825e-80	1.45099e-77	172.139	NM_024773
ESR1	-1.75559	0.241555	SORL1	6653	-1.75559	9.05539	16.7451	1.73701e-59	1.35599e-57	124.45	NM_003105
ESR1	-1.77802	0.277018	RCL1	10171	-1.77802	7.76484	16.8929	1.88325e-60	1.59352e-58	126.657	NM_005772
ESR1	-1.80302	0.219351	CD5L	922	-1.80302	6.34913	12.9071	7.50684e-37	1.09437e-35	72.7215	NM_005894
ESR1	-1.81045	0.307943	ACADL	33	-1.81045	6.44656	15.1945	9.09925e-50	3.35674e-48	102.226	NM_001608
ESR1	-1.81068	0.284965	FAM13A	10144	-1.81068	6.99108	18.723	6.26027e-73	1.84754e-70	155.21	NM_014883
ESR1	-1.81961	0.313451	STAB2	55576	-1.81961	5.04332	20.0544	1.35701e-82	1.26306e-79	177.332	NM_017564
ESR1	-1.84023	0.258269	SOCS2	8835	-1.84023	7.09998	13.9082	2.74379e-42	5.87609e-41	85.1357	NM_003877
ESR1	-1.89326	0.114461	PZP	5858	-1.89326	5.9815	12.65	1.64288e-35	2.2462e-34	69.6632	NM_002864
ESR1	-1.91928	0.260659	LPA	4018	-1.91928	8.6006	14.3251	1.18508e-44	2.91453e-43	90.5373	NM_005577
ESR1	-1.9255	0.18726	CYP2C19	1557	-1.9255	6.20671	14.316	1.33778e-44	3.27012e-43	90.4171	NM_000769
ESR1	-1.9422	0.379737	FCN2	2220	-1.9422	5.28033	20.6618	3.7165e-87	7.49495e-84	187.778	NM_015837
ESR1	-1.94697	0.23859	IGF1	3479	-1.94697	6.97813	14.7579	3.61797e-47	1.0836e-45	96.2847	NM_001111285
ESR1	-1.94991	0.142867	PLAC8	51316	-1.94991	5.85699	13.5591	2.35987e-40	4.33299e-39	80.7176	NM_016619
ESR1	-1.99833	0.278756	CYP4A22	284541	-1.99833	7.67521	13.8757	4.17077e-42	8.77676e-41	84.7203	NM_001308102
ESR1	-2.01393	0.30409	CLEC4M	10332	-2.01393	5.37908	16.0565	4.45464e-55	2.579e-53	114.367	NM_014257
ESR1	-2.03986	0.261347	ACSM3	6296	-2.03986	6.8633	16.7348	2.02669e-59	1.56197e-57	124.297	NM_202000
ESR1	-2.04035	0.316454	GSTZ1	2954	-2.04035	7.40052	17.4977	1.81428e-64	2.26318e-62	135.846	NM_145871
ESR1	-2.11067	0.305404	CYP2B6	1555	-2.11067	7.8518	14.5375	7.03737e-46	1.94411e-44	93.3393	NM_000767
ESR1	-2.14363	0.240474	CYP26A1	1592	-2.14363	5.35213	15.4236	3.72406e-51	1.53792e-49	105.399	NM_057157
ESR1	-2.22544	0.194576	MT2A	4502	-2.22544	12.6433	16.0137	8.27539e-55	4.63575e-53	113.752	NM_005953
ESR1	-2.34323	0.263775	KLKB1	3818	-2.34323	9.75447	17.9818	9.2549e-68	1.57724e-65	143.379	NM_001318396
ESR1	-2.3971	0.297588	ANXA10	11199	-2.3971	8.07242	16.3292	8.32111e-57	5.4132e-55	118.32	NM_007193
ESR1	-2.39732	0.256964	MARCO	8685	-2.39732	5.92433	17.2832	4.95701e-63	5.21564e-61	132.559	NM_006770
ESR1	-2.39851	0.272422	C8A	731	-2.39851	10.9524	16.0214	7.3967e-55	4.2217e-53	113.863	NM_000562
ESR1	-2.45804	0.185534	MT1E	4493	-2.45804	10.4661	16.945	8.57535e-61	7.41155e-59	127.439	NM_175617
ESR1	-2.46499	0.279285	IGFALS	3483	-2.46499	6.52272	20.2096	9.46098e-84	1.14478e-80	179.98	NM_004970
ESR1	-2.47534	0.288997	GYS2	2998	-2.47534	8.08895	14.222	4.61546e-44	1.08652e-42	89.1883	NM_021957
ESR1	-2.47926	0.252194	KCNN2	3781	-2.47926	5.40768	17.9931	7.74201e-68	1.35766e-65	143.556	NM_170775
ESR1	-2.50571	0.146012	BCHE	590	-2.50571	8.97366	14.8758	7.28893e-48	2.31486e-46	97.8749	NM_000055
ESR1	-2.52317	0.211493	KMO	8564	-2.52317	7.79605	17.7517	3.46594e-66	4.9926e-64	139.778	NM_003679
ESR1	-2.62272	0.287955	CRHBP	1393	-2.62272	5.82076	17.5642	6.46441e-65	8.32121e-63	136.871	NM_001882
ESR1	-2.6814	0.300475	RDH16	8608	-2.6814	9.76651	15.9078	3.8132e-54	2.01483e-52	112.234	NM_003708
ESR1	-2.69189	0.368332	GLYAT	10249	-2.69189	7.85057	16.0154	8.07484e-55	4.56568e-53	113.776	NM_201648
ESR1	-2.72678	0.295554	HAO2	51179	-2.72678	7.86115	15.0646	5.48737e-49	1.90796e-47	100.442	NM_016527
ESR1	-2.72986	0.348281	CYP39A1	51302	-2.72986	6.86713	18.9757	9.9855e-75	3.55366e-72	159.324	NM_016593
ESR1	-2.75276	0.201611	MT1H	4496	-2.75276	9.87126	17.6924	8.76354e-66	1.17821e-63	138.857	NM_005951
ESR1	-2.77021	0.232571	MT1X	4501	-2.77021	11.6182	16.5746	2.21473e-58	1.5857e-56	121.922	NM_005952
ESR1	-2.84527	0.184095	MT1G	4495	-2.84527	9.00456	18.2007	2.85306e-69	5.75367e-67	146.837	NM_005950
ESR1	-2.8475	0.376826	SRD5A2	6716	-2.8475	6.66503	20.0682	1.07107e-82	1.08e-79	177.567	NM_000348
ESR1	-2.87386	0.26694	GBA3	57733	-2.87386	8.42909	16.6631	5.92166e-59	4.39583e-57	123.232	NM_020973
ESR1	-2.98964	0.259425	CYP3A4	1576	-2.98964	9.41052	17.188	2.1335e-62	2.09881e-60	131.109	NM_017460
ESR1	-3.35242	0.350097	CLEC1B	51266	-3.35242	5.94796	20.5886	1.33137e-86	2.30137e-83	186.509	NM_016509
ESR1	-3.52543	0.320126	SLC22A1	6580	-3.52543	9.58167	15.7612	3.12051e-53	1.51639e-51	110.147	NM_153187
ESR1	-3.66793	0.410514	NAT2	10	-3.66793	7.38771	20.0357	1.8704e-82	1.61656e-79	177.013	NM_000015
ESR1	-3.69932	0.185013	MT1F	4494	-3.69932	10.282	18.8387	9.45896e-74	3.01193e-71	157.089	NM_005949
ESR1	-3.80166	0.177888	MT1M	4499	-3.80166	7.71224	16.7158	2.69592e-59	2.0646e-57	124.014	NM_176870
ESR1	-3.81741	0.29906	APOF	319	-3.81741	8.75018	19.7993	1.04929e-80	7.05356e-78	173.009	NM_001638
ESR1	-3.9518	0.311457	FCN3	8547	-3.9518	8.11085	20.1182	4.5476e-83	5.00236e-80	178.419	NM_173452
ESR1	-5.63689	0.386432	CYP1A2	1544	-5.63689	8.90824	21.2858	6.11022e-92	2.00965e-88	198.733	NM_000761
HMGA1	1.9851	0.236092	UBE2C	11065	1.9851	6.32331	-18.6851	1.16037e-72	3.26523e-70	154.597	NM_181801
HMGA1	1.96773	0.213784	CCNB1	891	1.96773	5.67338	-15.635	1.88208e-52	8.62619e-51	108.363	NM_031966
HMGA1	1.69834	0.144132	SFN	2810	1.69834	5.91528	-12.018	2.58233e-32	2.82261e-31	62.372	NM_006142
HMGA1	1.65871	0.21056	TRIP13	9319	1.65871	4.96799	-14.2675	2.53653e-44	6.08969e-43	89.7823	NM_004237
HMGA1	1.44253	0.194466	PKM	5315	1.44253	5.87017	-12.6414	1.82126e-35	2.47332e-34	69.5611	NM_182471
HMGA1	1.41843	0.154767	BOP1	23246	1.41843	6.7409	-13.7808	1.40939e-41	2.84226e-40	83.5125	NM_015201
HMGA1	1.36539	0.226034	TRIM28	10155	1.36539	8.29807	-13.1519	3.77891e-38	6.00063e-37	75.6845	NM_005762
HMGA1	1.27387	0.146551	BYSL	705	1.27387	5.96716	-14.6803	1.03335e-46	2.99127e-45	95.2431	NM_004053
HMGA1	1.27297	0.169495	DBN1	1627	1.27297	4.90783	-10.1766	7.97141e-24	5.28226e-23	43.0352	NM_080881
HMGA1	1.21549	0.132279	DYNC1H1	1778	1.21549	7.28366	-13.5463	2.77385e-40	5.07003e-39	80.5573	NM_001376
HMGA1	1.16191	0.0926634	PYCR1	5831	1.16191	5.61619	-7.74759	1.39248e-14	5.40724e-14	22.0704	NM_153824
HMGA1	1.15797	0.0746104	SLC39A4	55630	1.15797	5.35568	-4.17895	3.03777e-05	6.10176e-05	1.19844	NM_130849
HMGA1	1.14957	0.14897	SLC1A5	6510	1.14957	5.59677	-6.86832	8.32464e-12	2.71724e-11	15.8082	NM_005628
HMGA1	1.12785	0.153272	NME2	4831	1.12785	9.48576	-7.02333	2.83955e-12	9.53608e-12	16.8598	NM_002512
HMGA1	1.12451	0.127927	MAZ	4150	1.12451	5.64735	-9.01892	3.89485e-19	1.95794e-18	32.3824	NM_002383
HMGA1	1.05971	0.0865743	ATP13A2	23400	1.05971	4.79979	-4.59833	4.48924e-06	9.6844e-06	3.01867	NM_022089
HMGA1	1.04983	0.0665641	RHOF	54509	1.04983	4.8583	-3.32802	0.000888383	0.00153322	-1.96719	NM_019034
HMGA1	1.04671	0.108981	SRC	6714	1.04671	4.46268	-6.1572	8.70767e-10	2.48791e-09	11.2733	NM_198291
HMGA1	1.01979	0.113719	AGRN	375790	1.01979	5.65425	-1.51361	0.130263	0.164045	-6.33498	NM_198576
HMGA1	1.01633	-0.0840029	AP5M1	55745	1.01633	7.21678	-1.05111	0.29332	0.343413	-6.92602	NM_018229
HMGA1	-1.05662	-0.103554	ITSN1	6453	-1.05662	5.74853	4.87249	1.17685e-06	2.67265e-06	4.30093	NM_003024
HMGA1	-1.13974	-0.0626271	GSAP	54103	-1.13974	7.97323	5.6011	2.38339e-08	6.1543e-08	8.06107	NM_017439
HMGA1	-1.14694	-0.0811302	TMOD1	7111	-1.14694	6.47202	5.97416	2.67172e-09	7.39552e-09	10.1834	NM_003275
HMGA1	-1.15204	-0.0436913	SRSF5	6430	-1.15204	8.65897	10.2005	6.30291e-24	4.19963e-23	43.2672	NM_006925
HMGA1	-1.28324	-0.188004	SCP2	6342	-1.28324	10.4725	10.8737	6.83205e-27	5.37851e-26	50.0151	NM_002979
HMGA1	-1.35012	-0.178163	SHMT1	6470	-1.35012	6.93321	11.9918	3.48154e-32	3.77479e-31	62.0761	NM_148918
HMGA1	-1.42473	-0.186427	BCKDHB	594	-1.42473	6.94385	13.2168	1.69733e-38	2.77162e-37	76.478	NM_183050
HMGA1	-1.4471	-0.175791	PCK2	5106	-1.4471	9.89986	10.6895	4.59488e-26	3.44474e-25	48.1306	NM_004563
HMGA1	-1.509	-0.153423	SERPINA10	51156	-1.509	10.6359	11.1552	3.50451e-28	2.97785e-27	52.9529	NM_016186
HMGA1	-1.51544	-0.174779	MPDZ	8777	-1.51544	8.70725	12.3558	5.26092e-34	6.50891e-33	66.2286	NM_003829
HMGA1	-1.53027	-0.153675	ENPEP	2028	-1.53027	7.57734	12.2324	2.20543e-33	2.61881e-32	64.8088	NM_001977
HMGA1	-1.53536	-0.162415	DAO	1610	-1.53536	7.63913	9.88962	1.29247e-22	8.01173e-22	40.2841	NM_001917
HMGA1	-1.54137	-0.164624	C1R	715	-1.54137	10.2536	12.5047	9.19191e-35	1.19465e-33	67.957	NM_001733
HMGA1	-1.54852	-0.161009	MSRA	4482	-1.54852	7.38685	15.6009	3.05463e-52	1.38951e-50	107.882	NM_012331
HMGA1	-1.59413	-0.168307	ABCB4	5244	-1.59413	9.65047	9.49794	5.15554e-21	2.8774e-20	36.6463	NM_018850
HMGA1	-1.59439	-0.188685	ALDOB	229	-1.59439	10.4347	10.3923	9.37649e-25	6.53923e-24	45.1497	NM_000035
HMGA1	-1.5945	-0.159833	SLC27A2	11001	-1.5945	10.25	9.45328	7.78222e-21	4.29584e-20	36.2401	NM_003645
HMGA1	-1.61502	-0.158861	UPB1	51733	-1.61502	9.36989	10.101	1.67148e-23	1.0827e-22	42.3039	NM_016327
HMGA1	-1.62769	-0.207704	ALDH2	217	-1.62769	12.1721	15.9389	2.43554e-54	1.31563e-52	112.68	NM_001204889
HMGA1	-1.65463	-0.194899	ABCA6	23460	-1.65463	8.6529	12.3637	4.803e-34	5.97904e-33	66.3188	NM_080284
HMGA1	-1.70091	-0.185854	PON3	5446	-1.70091	11.5883	12.3287	7.21685e-34	8.8117e-33	65.9154	NM_000940
HMGA1	-1.71416	-0.165601	ECHDC2	55268	-1.71416	10.8689	17.8331	9.65213e-67	1.44186e-64	141.049	NM_018281
HMGA1	-1.71639	-0.166397	SLC46A3	283537	-1.71639	8.42631	11.8648	1.46414e-31	1.522e-30	60.6537	NM_181785
HMGA1	-1.73561	-0.208026	ETFDH	2110	-1.73561	8.60531	15.5209	9.46208e-52	4.05997e-50	106.759	NM_004453
HMGA1	-1.77284	-0.168594	ACSM2A	123876	-1.77284	9.17842	11.9515	5.49845e-32	5.86178e-31	61.6235	NM_001308954
HMGA1	-1.81045	-0.169553	ACADL	33	-1.81045	6.44656	15.1945	9.09925e-50	3.35674e-48	102.226	NM_001608
HMGA1	-1.83085	-0.178139	ETNPPL	64850	-1.83085	9.05566	10.458	4.84316e-25	3.42503e-24	45.8026	NM_031279
HMGA1	-1.84266	-0.17563	FMO3	2328	-1.84266	11.1488	10.6868	4.72429e-26	3.53956e-25	48.1031	NM_006894
HMGA1	-1.84648	-0.195373	C8B	732	-1.84648	10.8802	12.549	5.44708e-35	7.17189e-34	68.4755	NM_001278544
HMGA1	-1.85832	-0.184491	F11	2160	-1.85832	7.34401	16.7833	9.80543e-60	7.80564e-58	125.018	NM_001354804
HMGA1	-1.85847	-0.166577	EPHX2	2053	-1.85847	8.80763	13.9766	1.13344e-42	2.48453e-41	86.0127	NM_001979
HMGA1	-1.93818	-0.201504	PON1	5444	-1.93818	9.51321	13.196	2.19594e-38	3.557e-37	76.2226	NM_000446
HMGA1	-2.12008	-0.159395	BHMT	635	-2.12008	10.3181	12.1317	7.04028e-33	8.07464e-32	63.6591	NM_001713
HMGA1	-2.12211	-0.206504	CYP2C8	1558	-2.12211	9.39758	13.94	1.81955e-42	3.93152e-41	85.5431	NM_001198855
HMGA1	-2.28531	-0.174189	CYP2C9	1559	-2.28531	9.96408	14.5494	5.99846e-46	1.66471e-44	93.4978	NM_000771
HMGA1	-2.34323	-0.217196	KLKB1	3818	-2.34323	9.75447	17.9818	9.2549e-68	1.57724e-65	143.379	NM_001318396
HMGA1	-2.36321	-0.232422	ALDH8A1	64577	-2.36321	9.7457	17.0643	1.40605e-61	1.31885e-59	129.235	NM_170771
HMGA1	-2.3971	-0.196623	ANXA10	11199	-2.3971	8.07242	16.3292	8.32111e-57	5.4132e-55	118.32	NM_007193
HMGA1	-2.39851	-0.213041	C8A	731	-2.39851	10.9524	16.0214	7.3967e-55	4.2217e-53	113.863	NM_000562
HMGA1	-2.40209	-0.215657	C6	729	-2.40209	10.9857	14.4874	1.37435e-45	3.67914e-44	92.6751	NM_001115131
HMGA1	-2.4221	-0.174768	TAT	6898	-2.4221	8.48607	14.5036	1.10722e-45	2.99717e-44	92.8896	NM_000353
HMGA1	-2.4349	-0.224456	SLC10A1	6554	-2.4349	10.373	12.291	1.1189e-33	1.35658e-32	65.481	NM_003049
HMGA1	-2.47534	-0.230333	GYS2	2998	-2.47534	8.08895	14.222	4.61546e-44	1.08652e-42	89.1883	NM_021957
HMGA1	-2.47692	-0.248455	GHR	2690	-2.47692	9.89118	16.5197	4.99964e-58	3.49686e-56	121.113	NM_001242462
HMGA1	-2.61864	-0.216126	AFM	173	-2.61864	10.5468	14.9577	2.37977e-48	7.97653e-47	98.9859	NM_001133
HMGA1	-2.6814	-0.206248	RDH16	8608	-2.6814	9.76651	15.9078	3.8132e-54	2.01483e-52	112.234	NM_003708
HMGA1	-2.69189	-0.204282	GLYAT	10249	-2.69189	7.85057	16.0154	8.07484e-55	4.56568e-53	113.776	NM_201648
HMGA1	-2.72678	-0.190639	HAO2	51179	-2.72678	7.86115	15.0646	5.48737e-49	1.90796e-47	100.442	NM_016527
HMGA1	-2.87386	-0.198594	GBA3	57733	-2.87386	8.42909	16.6631	5.92166e-59	4.39583e-57	123.232	NM_020973
KLF11	-1.05854	0.0542898	OSBP	5007	-1.05854	8.37453	3.727	0.00019843	0.000367632	-0.571181	NM_002556
KLF11	-1.09753	0.0555689	NECTIN3	25945	-1.09753	7.40471	3.57327	0.000359776	0.000649067	-1.12757	NM_015480
KLF11	-1.1125	0.0813173	HADHA	3030	-1.1125	9.09655	6.37559	2.19454e-10	6.51472e-10	12.6151	NM_000182
KLF11	-1.13664	0.0620811	RAB27A	5873	-1.13664	7.31632	5.5603	3.00408e-08	7.70113e-08	7.83705	NM_183236
KLF11	-1.21513	0.0669044	PEX11A	8800	-1.21513	6.66892	10.2037	6.10569e-24	4.0727e-23	43.2986	NM_003847
KLF11	-1.248	0.114603	LPIN2	9663	-1.248	8.80549	8.95161	7.03582e-19	3.48479e-18	31.7997	NM_014646
KLF11	-1.27715	0.111393	PLPP3	8613	-1.27715	9.16639	8.36522	1.02468e-16	4.46315e-16	26.8964	NM_003713
KLF11	-1.28324	0.106409	SCP2	6342	-1.28324	10.4725	10.8737	6.83205e-27	5.37851e-26	50.0151	NM_002979
KLF11	-1.30199	0.11386	ACADM	34	-1.30199	10.7561	9.537	3.59131e-21	2.02965e-20	37.003	NM_001286044
KLF11	-1.30701	0.103828	FERMT2	10979	-1.30701	9.02685	12.069	1.44295e-32	1.60919e-31	62.9484	NM_006832
KLF11	-1.31388	0.125421	N4BP2L1	90634	-1.31388	5.84878	15.8299	1.1677e-53	5.81448e-52	111.123	NM_052818
KLF11	-1.34118	0.121928	MARC2	54996	-1.34118	9.45885	10.3215	1.90163e-24	1.30072e-23	44.451
KLF11	-1.34134	0.0911915	CISH	1154	-1.34134	5.93882	9.62087	1.64486e-21	9.55027e-21	37.7734	NM_145071
KLF11	-1.35169	0.109972	MUT	4594	-1.35169	9.68894	12.2205	2.53046e-33	2.99009e-32	64.6727
KLF11	-1.35334	0.125162	ACAT1	38	-1.35334	10.3112	10.571	1.54257e-25	1.1217e-24	46.9334	NM_000019
KLF11	-1.35349	0.108831	ETS2	2114	-1.35349	8.62561	10.4493	5.28826e-25	3.73543e-24	45.7157	NM_005239
KLF11	-1.35697	0.114076	HADH	3033	-1.35697	9.56839	11.6789	1.17048e-30	1.15709e-29	58.5957	NM_005327
KLF11	-1.36126	0.101598	ADRA1A	148	-1.36126	4.65001	17.334	2.26964e-63	2.51951e-61	133.335	NM_033304
KLF11	-1.36168	0.11216	KHK	3795	-1.36168	7.73235	9.52963	3.84524e-21	2.16911e-20	36.9356	NM_006488
KLF11	-1.36571	0.103853	HAGH	3029	-1.36571	9.42174	11.0028	1.76386e-27	1.445e-26	51.3543	NM_005326
KLF11	-1.40354	0.111407	ACAA2	10449	-1.40354	8.62964	12.7704	3.89758e-36	5.4521e-35	71.089	NM_006111
KLF11	-1.40864	0.100578	ABHD6	57406	-1.40864	7.25212	15.0441	7.27158e-49	2.51389e-47	100.163	NM_020676
KLF11	-1.42377	0.0847495	TRIB1	10221	-1.42377	9.35716	14.8495	1.04365e-47	3.29717e-46	97.5186	NM_025195
KLF11	-1.44162	0.115611	ECHS1	1892	-1.44162	11.9343	15.3066	1.91421e-50	7.3764e-49	103.774	NM_004092
KLF11	-1.44184	0.11322	UGP2	7360	-1.44184	9.89125	12.6189	2.37824e-35	3.20097e-34	69.2967	NM_006759
KLF11	-1.47682	0.107745	GOT2	2806	-1.47682	10.7657	14.0147	6.91173e-43	1.53453e-41	86.5033	NM_002080
KLF11	-1.50853	0.11114	CAT	847	-1.50853	9.64095	14.8729	7.58427e-48	2.40235e-46	97.8354	NM_001752
KLF11	-1.51544	0.102728	MPDZ	8777	-1.51544	8.70725	12.3558	5.26092e-34	6.50891e-33	66.2286	NM_003829
KLF11	-1.53477	0.115382	CYP4F3	4051	-1.53477	9.20474	11.4581	1.3331e-29	1.24081e-28	56.1877	NM_001199209
KLF11	-1.5556	0.120342	ST3GAL6	10402	-1.5556	6.37607	18.6566	1.84612e-72	4.9992e-70	154.135	NM_006100
KLF11	-1.56484	0.111739	ABAT	18	-1.56484	9.07771	13.3875	2.03743e-39	3.52857e-38	78.5799	NM_020686
KLF11	-1.56771	0.100088	HMGCL	3155	-1.56771	9.52351	16.4796	9.05448e-58	6.29651e-56	120.523	NM_001166059
KLF11	-1.5839	0.102368	ITIH1	3697	-1.5839	11.7015	11.049	1.0828e-27	8.93104e-27	51.837	NM_002215
KLF11	-1.5865	0.118674	C1RL	51279	-1.5865	8.97685	17.0679	1.33091e-61	1.25812e-59	129.29	NM_016546
KLF11	-1.59521	0.097305	PIPOX	51268	-1.59521	10.5834	11.1802	2.68487e-28	2.30077e-27	53.2165	NM_016518
KLF11	-1.61502	0.11409	UPB1	51733	-1.61502	9.36989	10.101	1.67148e-23	1.0827e-22	42.3039	NM_016327
KLF11	-1.62769	0.128437	ALDH2	217	-1.62769	12.1721	15.9389	2.43554e-54	1.31563e-52	112.68	NM_001204889
KLF11	-1.6367	0.0962719	AR	367	-1.6367	6.60489	14.4485	2.30585e-45	6.03913e-44	92.1616	NM_001348064
KLF11	-1.64035	0.111366	HSD17B6	8630	-1.64035	11.5754	7.98267	2.23643e-15	9.06254e-15	23.866	NM_003725
KLF11	-1.64288	0.108043	NDRG2	57447	-1.64288	7.52958	17.4923	1.97002e-64	2.40781e-62	135.764	NM_201541
KLF11	-1.65222	0.099952	ACADS	35	-1.65222	7.44852	18.7737	2.73823e-73	8.41513e-71	156.032	NM_001302554
KLF11	-1.65463	0.110385	ABCA6	23460	-1.65463	8.6529	12.3637	4.803e-34	5.97904e-33	66.3188	NM_080284
KLF11	-1.67094	0.145196	GNE	10020	-1.67094	9.42356	15.8658	6.9706e-54	3.55883e-52	111.635	NM_005476
KLF11	-1.6813	0.0966805	ALDH6A1	4329	-1.6813	9.41797	13.6776	5.2573e-41	1.00974e-39	82.2068	NM_005589
KLF11	-1.68449	0.0896405	IL1RAP	3556	-1.68449	7.74554	14.2464	3.34859e-44	7.96031e-43	89.5067	NM_134470
KLF11	-1.69457	0.127025	ACSL1	2180	-1.69457	11.0936	11.8438	1.85522e-31	1.91537e-30	60.4193	NM_001995
KLF11	-1.72195	0.116505	G6PC	2538	-1.72195	10.1315	9.94595	7.5233e-23	4.72158e-22	40.8183	NM_001270397
KLF11	-1.7294	0.0964477	HAAO	23498	-1.7294	7.05191	15.9808	1.33149e-54	7.42443e-53	113.279	NM_012205
KLF11	-1.73199	0.109422	SULT2A1	6822	-1.73199	11.4724	9.84415	1.99648e-22	1.22378e-21	39.8548	NM_003167
KLF11	-1.7354	0.108519	CYP2J2	1573	-1.7354	9.61516	13.5624	2.2635e-40	4.16871e-39	80.7589	NM_000775
KLF11	-1.73561	0.151673	ETFDH	2110	-1.73561	8.60531	15.5209	9.46208e-52	4.05997e-50	106.759	NM_004453
KLF11	-1.73693	0.114954	ACACB	32	-1.73693	7.8906	17.3359	2.20742e-63	2.47312e-61	133.363	NM_001093
KLF11	-1.74084	0.0993807	SLCO1B1	10599	-1.74084	8.95367	12.5069	8.95145e-35	1.1659e-33	67.9833	NM_006446
KLF11	-1.74315	0.115201	CPEB3	22849	-1.74315	6.38668	18.4481	5.39833e-71	1.25615e-68	150.78	NM_014912
KLF11	-1.75088	0.113755	CD14	929	-1.75088	11.1567	13.3435	3.52637e-39	6.0182e-38	78.036	NM_001174105
KLF11	-1.75542	0.110453	KDM8	79831	-1.75542	5.6403	19.7476	2.51825e-80	1.45099e-77	172.139	NM_024773
KLF11	-1.7573	0.097707	SLC38A4	55089	-1.7573	10.0155	10.2256	4.9212e-24	3.30264e-23	43.5116	NM_018018
KLF11	-1.77802	0.114228	RCL1	10171	-1.77802	7.76484	16.8929	1.88325e-60	1.59352e-58	126.657	NM_005772
KLF11	-1.78917	0.103022	CIDEB	27141	-1.78917	9.70596	13.2788	7.88454e-39	1.31048e-37	77.2382	NM_014430
KLF11	-1.84023	0.127746	SOCS2	8835	-1.84023	7.09998	13.9082	2.74379e-42	5.87609e-41	85.1357	NM_003877
KLF11	-1.84648	0.155292	C8B	732	-1.84648	10.8802	12.549	5.44708e-35	7.17189e-34	68.4755	NM_001278544
KLF11	-1.85335	0.128819	CYP4F2	8529	-1.85335	9.04708	14.3148	1.35834e-44	3.3137e-43	90.4019	NM_001082
KLF11	-1.85847	0.110113	EPHX2	2053	-1.85847	8.80763	13.9766	1.13344e-42	2.48453e-41	86.0127	NM_001979
KLF11	-1.88135	0.109212	AZGP1	563	-1.88135	11.4332	13.9666	1.28957e-42	2.81149e-41	85.8846	NM_001185
KLF11	-1.88386	0.111044	PDK4	5166	-1.88386	7.81917	13.1384	4.4635e-38	7.05992e-37	75.5194	NM_002612
KLF11	-1.91401	0.127182	HAO1	54363	-1.91401	10.0159	12.7651	4.15676e-36	5.80794e-35	71.0252	NM_017545
KLF11	-1.91928	0.122239	LPA	4018	-1.91928	8.6006	14.3251	1.18508e-44	2.91453e-43	90.5373	NM_005577
KLF11	-1.96535	0.0991037	SERPINA4	5267	-1.96535	8.87226	14.7686	3.13255e-47	9.52357e-46	96.4277	NM_006215
KLF11	-1.97269	0.131242	MAT1A	4143	-1.97269	10.9465	16.0142	8.21942e-55	4.62581e-53	113.758	NM_000429
KLF11	-1.99695	0.0998085	ACSM5	54988	-1.99695	7.79987	14.822	1.51698e-47	4.73078e-46	97.1474	NM_017888
KLF11	-2.03986	0.110085	ACSM3	6296	-2.03986	6.8633	16.7348	2.02669e-59	1.56197e-57	124.297	NM_202000
KLF11	-2.12211	0.115927	CYP2C8	1558	-2.12211	9.39758	13.94	1.81955e-42	3.93152e-41	85.5431	NM_001198855
KLF11	-2.19429	0.117422	SLC27A5	10998	-2.19429	8.95913	15.6946	8.06528e-53	3.84212e-51	109.204	NM_012254
KLF11	-2.19569	0.109507	CYP4A11	1579	-2.19569	10.0584	13.8686	4.56918e-42	9.59846e-41	84.6298	NM_001319155
KLF11	-2.28519	0.112698	FBP1	2203	-2.28519	10.468	15.4686	1.97708e-51	8.33543e-50	106.027	NM_001127628
KLF11	-2.34323	0.126993	KLKB1	3818	-2.34323	9.75447	17.9818	9.2549e-68	1.57724e-65	143.379	NM_001318396
KLF11	-2.36321	0.118527	ALDH8A1	64577	-2.36321	9.7457	17.0643	1.40605e-61	1.31885e-59	129.235	NM_170771
KLF11	-2.39851	0.127954	C8A	731	-2.39851	10.9524	16.0214	7.3967e-55	4.2217e-53	113.863	NM_000562
KLF11	-2.40209	0.112692	C6	729	-2.40209	10.9857	14.4874	1.37435e-45	3.67914e-44	92.6751	NM_001115131
KLF11	-2.47534	0.111731	GYS2	2998	-2.47534	8.08895	14.222	4.61546e-44	1.08652e-42	89.1883	NM_021957
KLF11	-2.47692	0.150344	GHR	2690	-2.47692	9.89118	16.5197	4.99964e-58	3.49686e-56	121.113	NM_001242462
KLF11	-2.51924	0.118865	DNASE1L3	1776	-2.51924	7.73334	17.573	5.63292e-65	7.40852e-63	137.008	NM_004944
KLF11	-2.61864	0.119234	AFM	173	-2.61864	10.5468	14.9577	2.37977e-48	7.97653e-47	98.9859	NM_001133
KLF11	-2.62272	0.109989	CRHBP	1393	-2.62272	5.82076	17.5642	6.46441e-65	8.32121e-63	136.871	NM_001882
KLF11	-2.6814	0.132637	RDH16	8608	-2.6814	9.76651	15.9078	3.8132e-54	2.01483e-52	112.234	NM_003708
KLF11	-2.75801	0.119227	F9	2158	-2.75801	11.1356	15.4012	5.09242e-51	2.07469e-49	105.088	NM_001313913
KLF11	-2.96809	0.122052	ADH1B	125	-2.96809	10.3929	17.9839	8.95473e-68	1.54789e-65	143.412	NM_001286650
KLF11	-2.98964	0.0978916	CYP3A4	1576	-2.98964	9.41052	17.188	2.1335e-62	2.09881e-60	131.109	NM_017460
KLF11	-3.35242	0.11007	CLEC1B	51266	-3.35242	5.94796	20.5886	1.33137e-86	2.30137e-83	186.509	NM_016509
KLF11	-3.52543	0.110303	SLC22A1	6580	-3.52543	9.58167	15.7612	3.12051e-53	1.51639e-51	110.147	NM_153187
NFE2L3	1.54679	0.161468	CEP55	55165	1.54679	4.62309	-14.4234	3.21995e-45	8.34291e-44	91.8303	NM_018131
NFE2L3	1.44253	0.191173	PKM	5315	1.44253	5.87017	-12.6414	1.82126e-35	2.47332e-34	69.5611	NM_182471
NFE2L3	1.4398	0.150307	TMSB10	9168	1.4398	12.0639	-12.1447	6.06594e-33	6.98362e-32	63.8067	NM_021103
NFE2L3	1.399	0.107357	PPT1	5538	1.399	9.72328	-13.4754	6.77356e-40	1.21243e-38	79.6719	NM_001363695
NFE2L3	1.3537	0.134526	SINHCAF	58516	1.3537	6.76066	-10.9197	4.22288e-27	3.36164e-26	50.4909	NM_021238
NFE2L3	1.27874	0.0502433	STAT1	6772	1.27874	8.67919	-7.93441	3.26857e-15	1.31176e-14	23.4933	NM_139266
NFE2L3	1.25928	0.0600611	CXCL11	6373	1.25928	4.64398	-6.4063	1.80143e-10	5.37807e-10	12.8074	NM_005409
NFE2L3	1.24338	0.0973442	ADAMDEC1	27299	1.24338	4.41208	-7.06516	2.11605e-12	7.16003e-12	17.1475	NM_014479
NFE2L3	1.23576	0.0834184	LAMP3	27074	1.23576	5.02543	-7.54912	6.27124e-14	2.34276e-13	20.5941	NM_014398
NFE2L3	1.19981	0.0625459	CEMIP	57214	1.19981	4.19385	-7.747	1.39887e-14	5.4286e-14	22.0659	NM_018689
NFE2L3	1.14879	0.060498	IDO1	3620	1.14879	4.38275	-6.27725	4.10427e-10	1.19956e-09	12.0053	NM_002164
NFE2L3	1.12871	0.147476	ELF4	2000	1.12871	4.93084	-6.66751	3.24526e-11	1.021e-10	14.4792	NM_001421
NFE2L3	1.11551	0.0636762	BIK	638	1.11551	4.11035	-4.8744	1.16566e-06	2.64873e-06	4.3101	NM_001197
NFE2L3	1.10984	0.124991	RHBDF2	79651	1.10984	6.35916	-6.72854	2.1546e-11	6.8625e-11	14.8791	NM_024599
NFE2L3	1.10745	0.102875	CXCL5	6374	1.10745	4.30177	-5.35118	9.60171e-08	2.3788e-07	6.7138	NM_002994
NFE2L3	1.10442	0.124534	DNAJC10	54431	1.10442	6.68584	-5.77161	8.90829e-09	2.36954e-08	9.01462	NM_018981
NFE2L3	1.09789	0.0521474	USH1C	10083	1.09789	4.32575	-3.74418	0.00018541	0.000344565	-0.50756	NM_153676
NFE2L3	1.07406	0.110423	PMAIP1	5366	1.07406	4.31255	-3.38854	0.00071447	0.00124803	-1.76551	NM_021127
NFE2L3	1.06418	0.051235	PTGES	9536	1.06418	4.52128	-4.85326	1.29569e-06	2.93539e-06	4.20861	NM_004878
NFE2L3	1.05882	0.156377	TMEM51	55092	1.05882	5.823	-2.68151	0.00738139	0.011343	-3.8969	NM_018022
NFE2L3	1.05065	0.0619253	GALNT10	55568	1.05065	4.61866	-4.40028	1.13035e-05	2.36229e-05	2.13775	NM_198321
NFE2L3	1.04776	0.0838785	MYB	4602	1.04776	4.13187	-5.90243	4.11063e-09	1.12049e-08	9.76502	NM_005375
NFE2L3	1.03963	0.0453179	TNFRSF9	3604	1.03963	4.35121	-3.33645	0.000862024	0.00149028	-1.93934	NM_001561
NFE2L3	1.02727	0.0945023	CDH17	1015	1.02727	4.17461	-1.23688	0.216259	0.260605	-6.7142	NM_004063
NFE2L3	1.02713	0.0794618	TGFB2	7042	1.02713	4.1875	-1.85322	0.0639782	0.0852855	-5.76552	NM_003238
NFE2L3	1.02254	0.0684459	OLFM4	10562	1.02254	4.0163	-1.06165	0.288505	0.338233	-6.91492	NM_006418
NFE2L3	1.02172	0.0640869	LAMP5	24141	1.02172	3.97849	-1.33514	0.181961	0.222496	-6.58826	NM_012261
NFE2L3	1.02165	0.0528232	MST1R	4486	1.02165	3.99383	-1.47818	0.139496	0.174568	-6.38778	NM_002447
NFE2L3	1.01267	0.094228	LRP8	7804	1.01267	4.21392	-1.00254	0.316189	0.367733	-6.97574	NM_033300
NFE2L3	1.01213	0.0470988	ST6GALNAC5	81849	1.01213	3.8349	-1.80583	0.0710748	0.0940102	-5.85186	NM_030965
NFE2L3	1.00784	0.0937671	CTSE	1510	1.00784	4.39936	-0.337409	0.73584	0.771681	-7.42004	NM_148964
NFE2L3	-1.0054	0.0799633	IL2RG	3561	-1.0054	6.27362	0.16839	0.866292	0.886513	-7.46267	NM_000206
NFE2L3	-1.00633	0.0414037	UTS2	10911	-1.00633	4.09778	0.686248	0.492626	0.544413	-7.242	NM_021995
NFE2L3	-1.00814	-0.091369	APOA2	336	-1.00814	14.5501	0.234275	0.814792	0.841138	-7.44944	NM_001643
NFE2L3	-1.04213	0.046794	LMO4	8543	-1.04213	6.11249	2.73574	0.00627174	0.00973548	-3.75087	NM_006769
NFE2L3	-1.0427	-0.104356	APOE	348	-1.0427	10.8757	2.55341	0.0107313	0.0161263	-4.2303	NM_001302691
NFE2L3	-1.05803	-0.0632417	SEPHS2	22928	-1.05803	11.5301	2.9712	0.00299708	0.00485081	-3.08319	NM_012248
NFE2L3	-1.12725	-0.13128	C4BPB	725	-1.12725	10.2789	3.34862	0.000825221	0.00143075	-1.89897	NM_001017367
NFE2L3	-1.13567	-0.0986309	ITIH2	3698	-1.13567	12.8946	3.76059	0.000173734	0.000323961	-0.446556	NM_002216
NFE2L3	-1.15854	-0.0980951	VTN	7448	-1.15854	11.8931	5.38725	7.88082e-08	1.9629e-07	6.90455	NM_000638
NFE2L3	-1.1713	-0.0924518	GC	2638	-1.1713	13.7507	4.79413	1.73788e-06	3.89269e-06	3.92702	NM_001204307
NFE2L3	-1.17887	-0.16344	SERPIND1	3053	-1.17887	11.89	3.90074	9.86418e-05	0.000188736	0.0854837	NM_000185
NFE2L3	-1.17916	-0.150076	APOC1	341	-1.17916	13.7278	7.85947	5.86848e-15	2.32586e-14	22.9186	NM_001645
NFE2L3	-1.19314	-0.157323	SLC38A3	10991	-1.19314	9.01739	4.09485	4.36994e-05	8.64133e-05	0.854054	NM_006841
NFE2L3	-1.20568	-0.121425	CRAT	1384	-1.20568	7.64368	12.0536	1.72081e-32	1.90851e-31	62.774	NM_004003
NFE2L3	-1.23457	-0.160736	SLC6A1	6529	-1.23457	9.32427	4.82226	1.51195e-06	3.40237e-06	4.06055	NM_003042
NFE2L3	-1.24734	-0.148891	A1CF	29974	-1.24734	10.6772	8.84563	1.77083e-18	8.5777e-18	30.8905	NM_138933
NFE2L3	-1.25837	-0.108205	ORM1	5004	-1.25837	13.684	6.01044	2.14463e-09	5.96827e-09	10.3969	NM_000607
NFE2L3	-1.27076	-0.127624	SLC25A20	788	-1.27076	8.38668	9.31829	2.67294e-20	1.43363e-19	35.0232	NM_000387
NFE2L3	-1.27137	-0.216066	KNG1	3827	-1.27137	12.3829	5.21285	2.02501e-07	4.90738e-07	5.99383	NM_001166451
NFE2L3	-1.31249	-0.136094	PXMP2	5827	-1.31249	9.16257	8.39803	7.81805e-17	3.425e-16	27.1624	NM_018663
NFE2L3	-1.32859	-0.156139	DHTKD1	55526	-1.32859	9.03794	10.2132	5.55944e-24	3.71243e-23	43.3912	NM_018706
NFE2L3	-1.34641	-0.154508	AMBP	259	-1.34641	9.49579	11.669	1.30635e-30	1.28616e-29	58.4869	NM_001633
NFE2L3	-1.35169	-0.14126	MUT	4594	-1.35169	9.68894	12.2205	2.53046e-33	2.99009e-32	64.6727
NFE2L3	-1.36168	-0.133656	KHK	3795	-1.36168	7.73235	9.52963	3.84524e-21	2.16911e-20	36.9356	NM_006488
NFE2L3	-1.3638	-0.174276	SERPINC1	462	-1.3638	12.8576	5.54227	3.32593e-08	8.50279e-08	7.73857	NM_000488
NFE2L3	-1.36449	-0.17554	APOC3	345	-1.36449	13.021	6.83626	1.03703e-11	3.36048e-11	15.5934	NM_000040
NFE2L3	-1.3702	-0.169746	HPN	3249	-1.3702	9.48965	11.1341	4.3912e-28	3.71044e-27	52.7298	NM_182983
NFE2L3	-1.38128	-0.170785	F12	2161	-1.38128	8.79593	10.7851	1.7155e-26	1.32891e-25	49.1047	NM_000505
NFE2L3	-1.38734	-0.141487	HYAL1	3373	-1.38734	8.97252	10.6855	4.78698e-26	3.58209e-25	48.0901	NM_153285
NFE2L3	-1.3966	-0.171158	F2	2147	-1.3966	10.6942	9.41831	1.07299e-20	5.85093e-20	35.9233	NM_001311257
NFE2L3	-1.41143	-0.174393	HMGCS2	3158	-1.41143	11.9894	7.43892	1.42407e-13	5.19169e-13	19.7901	NM_005518
NFE2L3	-1.4281	-0.10967	ASGR2	433	-1.4281	11.039	12.5471	5.56815e-35	7.32332e-34	68.4537	NM_080914
NFE2L3	-1.43382	-0.17161	TFR2	7036	-1.43382	8.60451	12.3566	5.21444e-34	6.46462e-33	66.2374	NM_003227
NFE2L3	-1.4471	-0.151407	PCK2	5106	-1.4471	9.89986	10.6895	4.59488e-26	3.44474e-25	48.1306	NM_004563
NFE2L3	-1.44727	-0.161892	ASGR1	432	-1.44727	11.0254	11.057	9.94835e-28	8.23358e-27	51.9208	NM_001671
NFE2L3	-1.46497	-0.142081	FAH	2184	-1.46497	9.01502	14.6757	1.09918e-46	3.16668e-45	95.1819	NM_000137
NFE2L3	-1.46964	-0.159659	ACOX2	8309	-1.46964	10.0062	9.68431	9.07467e-22	5.35366e-21	38.3603	NM_003500
NFE2L3	-1.47678	-0.236571	RBP4	5950	-1.47678	10.9542	12.3559	5.25636e-34	6.50891e-33	66.2295	NM_006744
NFE2L3	-1.50155	-0.187019	PROC	5624	-1.50155	10.604	13.0236	1.82005e-37	2.78063e-36	74.1261	NM_000312
NFE2L3	-1.509	-0.133977	SERPINA10	51156	-1.509	10.6359	11.1552	3.50451e-28	2.97785e-27	52.9529	NM_016186
NFE2L3	-1.52881	-0.135187	RGN	9104	-1.52881	9.67892	10.9424	3.32783e-27	2.67021e-26	50.7265	NM_152869
NFE2L3	-1.53477	-0.169782	CYP4F3	4051	-1.53477	9.20474	11.4581	1.3331e-29	1.24081e-28	56.1877	NM_001199209
NFE2L3	-1.54234	-0.143719	HGD	3081	-1.54234	9.74757	12.4046	2.97487e-34	3.7379e-33	66.7934	NM_000187
NFE2L3	-1.5523	-0.151106	CDO1	1036	-1.5523	10.3334	9.08537	2.16382e-19	1.10195e-18	32.9616	NM_001801
NFE2L3	-1.55349	-0.160427	CPN2	1370	-1.55349	9.9667	10.3948	9.14002e-25	6.38166e-24	45.175	NM_001291988
NFE2L3	-1.56379	-0.1338	ARG1	383	-1.56379	10.0794	9.37761	1.55731e-20	8.43485e-20	35.5559	NM_001244438
NFE2L3	-1.56402	-0.141343	ANGPTL3	27329	-1.56402	9.79338	10.6955	4.31942e-26	3.24426e-25	48.1917	NM_014495
NFE2L3	-1.57424	-0.139101	ACADSB	36	-1.57424	8.82961	13.5093	4.42407e-40	7.98974e-39	80.0944	NM_001609
NFE2L3	-1.57566	-0.14504	TTR	7276	-1.57566	13.2891	8.96177	6.43707e-19	3.1974e-18	31.8874	NM_000371
NFE2L3	-1.5839	-0.185943	ITIH1	3697	-1.5839	11.7015	11.049	1.0828e-27	8.93104e-27	51.837	NM_002215
NFE2L3	-1.58781	-0.147421	SLC25A15	10166	-1.58781	8.87875	11.4276	1.85895e-29	1.71836e-28	55.8587	NM_014252
NFE2L3	-1.59439	-0.150914	ALDOB	229	-1.59439	10.4347	10.3923	9.37649e-25	6.53923e-24	45.1497	NM_000035
NFE2L3	-1.5945	-0.150009	SLC27A2	11001	-1.5945	10.25	9.45328	7.78222e-21	4.29584e-20	36.2401	NM_003645
NFE2L3	-1.59521	-0.160206	PIPOX	51268	-1.59521	10.5834	11.1802	2.68487e-28	2.30077e-27	53.2165	NM_016518
NFE2L3	-1.597	-0.1326	ACAA1	30	-1.597	10.2162	15.4018	5.05062e-51	2.06461e-49	105.096	NM_001607
NFE2L3	-1.60313	-0.185625	MST1	4485	-1.60313	10.8993	13.9631	1.34992e-42	2.93777e-41	85.8393	NM_020998
NFE2L3	-1.60938	-0.141345	MASP2	10747	-1.60938	7.52341	13.3133	5.13472e-39	8.64119e-38	77.6634	NM_139208
NFE2L3	-1.61502	-0.174744	UPB1	51733	-1.61502	9.36989	10.101	1.67148e-23	1.0827e-22	42.3039	NM_016327
NFE2L3	-1.61738	-0.131156	NR1I3	9970	-1.61738	7.2269	11.0461	1.1165e-27	9.20278e-27	51.8067	NM_005122
NFE2L3	-1.64035	-0.132708	HSD17B6	8630	-1.64035	11.5754	7.98267	2.23643e-15	9.06254e-15	23.866	NM_003725
NFE2L3	-1.65445	-0.184098	AGXT	189	-1.65445	10.8716	10.2426	4.1602e-24	2.79813e-23	43.6776	NM_000030
NFE2L3	-1.65463	-0.158673	ABCA6	23460	-1.65463	8.6529	12.3637	4.803e-34	5.97904e-33	66.3188	NM_080284
NFE2L3	-1.6813	-0.140078	ALDH6A1	4329	-1.6813	9.41797	13.6776	5.2573e-41	1.00974e-39	82.2068	NM_005589
NFE2L3	-1.70091	-0.132168	PON3	5446	-1.70091	11.5883	12.3287	7.21685e-34	8.8117e-33	65.9154	NM_000940
NFE2L3	-1.7354	-0.141061	CYP2J2	1573	-1.7354	9.61516	13.5624	2.2635e-40	4.16871e-39	80.7589	NM_000775
NFE2L3	-1.73597	-0.151724	DPYS	1807	-1.73597	11.1684	10.98	2.24351e-27	1.81097e-26	51.1164	NM_001385
NFE2L3	-1.74084	-0.136378	SLCO1B1	10599	-1.74084	8.95367	12.5069	8.95145e-35	1.1659e-33	67.9833	NM_006446
NFE2L3	-1.76642	-0.15242	DCXR	51181	-1.76642	11.8281	13.4743	6.86777e-40	1.22747e-38	79.6582	NM_016286
NFE2L3	-1.77284	-0.159874	ACSM2A	123876	-1.77284	9.17842	11.9515	5.49845e-32	5.86178e-31	61.6235	NM_001308954
NFE2L3	-1.78917	-0.133258	CIDEB	27141	-1.78917	9.70596	13.2788	7.88454e-39	1.31048e-37	77.2382	NM_014430
NFE2L3	-1.81055	-0.155646	PLG	5340	-1.81055	11.6009	11.0834	7.52581e-28	6.29318e-27	52.1969	NM_001168338
NFE2L3	-1.82206	-0.171831	HPX	3263	-1.82206	12.7405	11.3872	2.88484e-29	2.64244e-28	55.4238	NM_000613
NFE2L3	-1.84648	-0.147653	C8B	732	-1.84648	10.8802	12.549	5.44708e-35	7.17189e-34	68.4755	NM_001278544
NFE2L3	-1.85832	-0.138446	F11	2160	-1.85832	7.34401	16.7833	9.80543e-60	7.80564e-58	125.018	NM_001354804
NFE2L3	-1.88135	-0.1506	AZGP1	563	-1.88135	11.4332	13.9666	1.28957e-42	2.81149e-41	85.8846	NM_001185
NFE2L3	-1.91928	-0.131755	LPA	4018	-1.91928	8.6006	14.3251	1.18508e-44	2.91453e-43	90.5373	NM_005577
NFE2L3	-1.96535	-0.134443	SERPINA4	5267	-1.96535	8.87226	14.7686	3.13255e-47	9.52357e-46	96.4277	NM_006215
NFE2L3	-1.97269	-0.18254	MAT1A	4143	-1.97269	10.9465	16.0142	8.21942e-55	4.62581e-53	113.758	NM_000429
NFE2L3	-1.97643	-0.131527	CPS1	1373	-1.97643	12.3213	10.0269	3.44009e-23	2.19657e-22	41.591	NM_001875
NFE2L3	-2.09025	-0.163776	FTCD	10841	-2.09025	8.95073	15.9575	1.86389e-54	1.0205e-52	112.945	NM_206965
NFE2L3	-2.12008	-0.136049	BHMT	635	-2.12008	10.3181	12.1317	7.04028e-33	8.07464e-32	63.6591	NM_001713
NFE2L3	-2.19429	-0.164685	SLC27A5	10998	-2.19429	8.95913	15.6946	8.06528e-53	3.84212e-51	109.204	NM_012254
NFE2L3	-2.19569	-0.172227	CYP4A11	1579	-2.19569	10.0584	13.8686	4.56918e-42	9.59846e-41	84.6298	NM_001319155
NFE2L3	-2.34323	-0.146183	KLKB1	3818	-2.34323	9.75447	17.9818	9.2549e-68	1.57724e-65	143.379	NM_001318396
NFE2L3	-2.39851	-0.134689	C8A	731	-2.39851	10.9524	16.0214	7.3967e-55	4.2217e-53	113.863	NM_000562
NFE2L3	-2.4349	-0.131264	SLC10A1	6554	-2.4349	10.373	12.291	1.1189e-33	1.35658e-32	65.481	NM_003049
NFE2L3	-2.75801	-0.135876	F9	2158	-2.75801	11.1356	15.4012	5.09242e-51	2.07469e-49	105.088	NM_001313913
NR0B2	1.41067	0.0325046	FGF21	26291	1.41067	5.70925	-7.50685	8.60132e-14	3.17886e-13	20.2844	NM_019113
NR0B2	1.39592	-0.0947114	FANCG	2189	1.39592	5.43339	-12.9692	3.53092e-37	5.26808e-36	73.4691	NM_004629
NR0B2	1.34398	0.0415477	LGALS4	3960	1.34398	9.23211	-4.76008	2.05506e-06	4.57267e-06	3.76637	NM_006149
NR0B2	1.27534	-0.0567886	CST1	1469	1.27534	4.23248	-6.14496	9.39467e-10	2.67598e-09	11.1994	NM_001898
NR0B2	1.24209	-0.0785256	ASAP2	8853	1.24209	6.30592	-7.84517	6.55795e-15	2.59148e-14	22.8095	NM_003887
NR0B2	1.23711	-0.0508498	ODAM	54959	1.23711	4.24308	-4.98705	6.58748e-07	1.5308e-06	4.85826	NM_017855
NR0B2	1.1883	-0.0431865	SPOCK1	6695	1.1883	4.41663	-5.98474	2.50625e-09	6.94905e-09	10.2455	NM_004598
NR0B2	1.17491	-0.0836045	SLC7A6	9057	1.17491	4.71722	-10.1996	6.35533e-24	4.23222e-23	43.259	NM_003983
NR0B2	1.17467	-0.0470328	CHN1	1123	1.17467	4.58245	-7.80266	9.11384e-15	3.57347e-14	22.4864	NM_001822
NR0B2	1.15878	0.0693825	SCCPDH	51097	1.15878	8.47712	-6.41126	1.74474e-10	5.22171e-10	12.8386	NM_016002
NR0B2	1.15277	-0.0508511	TSPAN5	10098	1.15277	4.59847	-6.73131	2.11473e-11	6.7373e-11	14.8974	NM_005723
NR0B2	1.14536	-0.0503245	COL4A5	1287	1.14536	4.8419	-4.45848	8.64994e-06	1.8266e-05	2.39267	NM_033380
NR0B2	1.11575	0.0865667	ATP2B2	491	1.11575	5.90833	-5.12606	3.20464e-07	7.63761e-07	5.55155	NM_001683
NR0B2	1.10442	-0.0862463	DNAJC10	54431	1.10442	6.68584	-5.77161	8.90829e-09	2.36954e-08	9.01462	NM_018981
NR0B2	1.09431	-0.0611376	TRIB2	28951	1.09431	6.09274	-3.32678	0.000892329	0.00153894	-1.97129	NM_021643
NR0B2	1.09244	0.0354816	INHBB	3625	1.09244	7.41494	-2.70166	0.00694996	0.010714	-3.84298	NM_002193
NR0B2	1.07605	0.0452947	SLC35C1	55343	1.07605	6.65745	-2.63478	0.00847545	0.012916	-4.02038	NM_018389
NR0B2	1.07024	-0.0485254	CYB5B	80777	1.07024	7.44067	-3.61879	0.000302347	0.000550467	-0.965235	NM_030579
NR0B2	1.06259	-0.0896875	SLC25A14	9016	1.06259	5.39205	-4.94422	8.19537e-07	1.88812e-06	4.64838	NM_001282198
NR0B2	1.05792	0.0559977	SREBF1	6720	1.05792	6.78934	-2.27263	0.0231403	0.0328906	-4.90427	NM_004176
NR0B2	1.0541	0.0570887	LRRC2	79442	1.0541	5.92127	-2.09236	0.036515	0.0505528	-5.29582	NM_024512
NR0B2	1.04025	-0.039753	SLC25A12	8604	1.04025	4.56599	-2.64693	0.00817793	0.0125004	-3.98849	NM_003705
NR0B2	1.03936	0.058834	MOAP1	64112	1.03936	8.22539	-2.15438	0.031314	0.0437984	-5.16476	NM_022151
NR0B2	1.01844	0.0446619	CEACAM1	634	1.01844	7.01798	-0.857653	0.391173	0.44439	-7.11008	NM_001712
NR0B2	1.01823	0.0554672	NT5E	4907	1.01823	7.40572	-0.581772	0.560777	0.610033	-7.30805	NM_002526
NR0B2	1.01807	-0.0320994	TRPS1	7227	1.01807	5.00578	-0.920594	0.357359	0.410413	-7.05429	NM_014112
NR0B2	1.01681	-0.0741601	IST1	9798	1.01681	8.11791	-1.15332	0.248898	0.295754	-6.81373	NM_014761
NR0B2	1.00952	0.0636478	ANGPTL8	55908	1.00952	8.25162	-0.178565	0.858295	0.879743	-7.46091	NM_018687
NR0B2	-1.00285	-0.0400225	BBS7	55212	-1.00285	4.53819	0.257454	0.796851	0.826283	-7.44376	NM_176824
NR0B2	-1.0243	-0.0445969	THSD1	55901	-1.0243	5.61097	1.0474	0.295027	0.345178	-6.9299	NM_199263
NR0B2	-1.04183	0.0429138	SPRED2	200734	-1.04183	5.50657	3.73501	0.000192261	0.000356858	-0.541576	NM_181784
NR0B2	-1.04191	-0.0424795	TCF7	6932	-1.04191	5.58128	3.88441	0.000105466	0.000200967	0.0225003	NM_213648
NR0B2	-1.05285	0.10114	SMCO4	56935	-1.05285	9.42609	2.28088	0.0226466	0.0322533	-4.88558	NM_020179
NR0B2	-1.05446	0.101775	GGCX	2677	-1.05446	8.00074	2.7762	0.00554429	0.00865737	-3.64004	NM_001311312
NR0B2	-1.09043	0.0903561	DHRS3	9249	-1.09043	9.93466	4.16631	3.20979e-05	6.43553e-05	1.14623	NM_004753
NR0B2	-1.09462	0.0877108	MPST	4357	-1.09462	9.01133	4.65342	3.44969e-06	7.50472e-06	3.2705	NM_021126
NR0B2	-1.09795	0.0589723	TPST2	8459	-1.09795	9.02881	4.04651	5.36982e-05	0.000105274	0.659207	NM_003595
NR0B2	-1.09813	0.0924622	PDIA5	10954	-1.09813	9.18339	4.21532	2.59039e-05	5.24318e-05	1.34952	NM_006810
NR0B2	-1.10423	0.0966772	INPP1	3628	-1.10423	8.24953	4.23355	2.39049e-05	4.85725e-05	1.42572	NM_002194
NR0B2	-1.10797	0.0872703	NAT8B	51471	-1.10797	7.29549	2.86958	0.00414759	0.00659213	-3.37805	NM_016347
NR0B2	-1.10823	0.0471021	DCPS	28960	-1.10823	8.01268	3.3874	0.000717422	0.00125264	-1.76933	NM_014026
NR0B2	-1.11188	0.0598491	SLPI	6590	-1.11188	8.75685	1.72626	0.0844337	0.110068	-5.99181	NM_003064
NR0B2	-1.11872	0.0723931	SMPD1	6609	-1.11872	5.51675	8.8919	1.18498e-18	5.78154e-18	31.2862	NM_001318088
NR0B2	-1.12689	0.0593949	CPTP	80772	-1.12689	6.79552	6.1338	1.00672e-09	2.86149e-09	11.1321	NM_001029885
NR0B2	-1.14655	0.116826	SERPINA6	866	-1.14655	10.1929	3.33473	0.000867328	0.0014986	-1.94501	NM_001756
NR0B2	-1.15758	0.0961014	FDX1	2230	-1.15758	8.30292	7.67544	2.41656e-14	9.24744e-14	21.5295	NM_004109
NR0B2	-1.15854	0.0946	VTN	7448	-1.15854	11.8931	5.38725	7.88082e-08	1.9629e-07	6.90455	NM_000638
NR0B2	-1.16167	0.0381048	SLC17A9	63910	-1.16167	6.9269	5.46537	5.1168e-08	1.28932e-07	7.32193	NM_022082
NR0B2	-1.16312	0.0359426	SEC14L4	284904	-1.16312	5.73552	5.92125	3.67289e-09	1.00457e-08	9.87434	NM_174977
NR0B2	-1.17027	0.0889609	MMACHC	25974	-1.17027	6.75223	7.12237	1.4117e-12	4.83351e-12	17.5435	NM_015506
NR0B2	-1.17519	0.0867646	TMEM57	55219	-1.17519	7.42531	8.9037	1.06928e-18	5.23392e-18	31.3874
NR0B2	-1.17887	0.0963893	SERPIND1	3053	-1.17887	11.89	3.90074	9.86418e-05	0.000188736	0.0854837	NM_000185
NR0B2	-1.1789	0.0947339	TST	7263	-1.1789	12.2786	6.81089	1.2331e-11	3.97987e-11	15.4242	NM_003312
NR0B2	-1.17916	0.0904062	APOC1	341	-1.17916	13.7278	7.85947	5.86848e-15	2.32586e-14	22.9186	NM_001645
NR0B2	-1.18378	0.124173	MGLL	11343	-1.18378	7.97985	5.12419	3.23628e-07	7.70998e-07	5.54209	NM_007283
NR0B2	-1.19314	0.0901962	SLC38A3	10991	-1.19314	9.01739	4.09485	4.36994e-05	8.64133e-05	0.854054	NM_006841
NR0B2	-1.19479	0.0884925	NR1H4	9971	-1.19479	8.95341	6.5812	5.75735e-11	1.78078e-10	13.9197	NM_005123
NR0B2	-1.20365	0.0757298	ANPEP	290	-1.20365	8.97692	7.37557	2.27027e-13	8.18054e-13	19.3331	NM_001150
NR0B2	-1.21133	0.0915433	FURIN	5045	-1.21133	8.28309	7.44914	1.32041e-13	4.82751e-13	19.8642	NM_002569
NR0B2	-1.22837	0.0773812	DNAJC22	79962	-1.22837	7.74737	8.81243	2.3598e-18	1.13624e-17	30.6077	NM_024902
NR0B2	-1.24734	0.0922244	A1CF	29974	-1.24734	10.6772	8.84563	1.77083e-18	8.5777e-18	30.8905	NM_138933
NR0B2	-1.25537	0.118612	PHYH	5264	-1.25537	11.0083	7.95679	2.74196e-15	1.10592e-14	23.6658	NM_006214
NR0B2	-1.25837	0.0979127	ORM1	5004	-1.25837	13.684	6.01044	2.14463e-09	5.96827e-09	10.3969	NM_000607
NR0B2	-1.26029	0.0995894	CYP2D6	1565	-1.26029	7.02649	8.09719	9.00999e-16	3.72466e-15	24.7591	NM_001025161
NR0B2	-1.26796	0.102704	TPMT	7172	-1.26796	7.30446	13.4398	1.05934e-39	1.87124e-38	79.2285	NM_001346818
NR0B2	-1.27473	0.0919313	PECR	55825	-1.27473	9.1824	7.76665	1.20288e-14	4.68452e-14	22.2141	NM_018441
NR0B2	-1.28171	0.0673662	SERPINE1	5054	-1.28171	7.69875	5.05782	4.57501e-07	1.077e-06	5.20886	NM_000602
NR0B2	-1.28752	0.19766	NAT8	9027	-1.28752	7.94867	5.8659	5.10953e-09	1.38498e-08	9.55387	NM_003960
NR0B2	-1.29704	0.0862216	SUCLG2	8801	-1.29704	9.27234	12.0889	1.15015e-32	1.29339e-31	63.173	NM_003848
NR0B2	-1.3027	0.0928977	ASL	435	-1.3027	9.23778	9.02533	3.68062e-19	1.85719e-18	32.4381	NM_001024946
NR0B2	-1.30845	0.0973783	C8G	733	-1.30845	9.67949	6.92591	5.59689e-12	1.84681e-11	16.1962	NM_000606
NR0B2	-1.31485	0.0919553	BDH1	622	-1.31485	7.65967	8.26354	2.35544e-16	1.00532e-15	26.0779	NM_203315
NR0B2	-1.31868	0.0938902	FAXDC2	10826	-1.31868	6.83167	12.3808	3.93084e-34	4.91355e-33	66.5173	NM_032385
NR0B2	-1.32855	0.0978504	ENTPD5	957	-1.32855	8.12076	10.1154	1.45245e-23	9.4386e-23	42.4426	NM_001330189
NR0B2	-1.32859	0.0965463	DHTKD1	55526	-1.32859	9.03794	10.2132	5.55944e-24	3.71243e-23	43.3912	NM_018706
NR0B2	-1.33547	0.132943	GOT1	2805	-1.33547	11.124	8.45767	4.76884e-17	2.11443e-16	27.6487	NM_002079
NR0B2	-1.33555	0.13384	MASP1	5648	-1.33555	6.30632	12.1232	7.76341e-33	8.87037e-32	63.5623	NM_139125
NR0B2	-1.34641	0.108191	AMBP	259	-1.34641	9.49579	11.669	1.30635e-30	1.28616e-29	58.4869	NM_001633
NR0B2	-1.35012	0.0940716	SHMT1	6470	-1.35012	6.93321	11.9918	3.48154e-32	3.77479e-31	62.0761	NM_148918
NR0B2	-1.35169	0.111566	MUT	4594	-1.35169	9.68894	12.2205	2.53046e-33	2.99009e-32	64.6727
NR0B2	-1.35334	0.100044	ACAT1	38	-1.35334	10.3112	10.571	1.54257e-25	1.1217e-24	46.9334	NM_000019
NR0B2	-1.35349	0.0303762	FST	10468	-1.35349	8.72125	7.16395	1.04995e-12	3.61537e-12	17.8333	NM_013409
NR0B2	-1.3702	0.167465	HPN	3249	-1.3702	9.48965	11.1341	4.3912e-28	3.71044e-27	52.7298	NM_182983
NR0B2	-1.37267	0.0583772	ADGRG6	57211	-1.37267	7.74943	10.4974	3.25598e-25	2.32022e-24	46.195	NM_198569
NR0B2	-1.38291	0.0893561	DIO1	1733	-1.38291	9.67217	5.75639	9.73702e-09	2.58486e-08	8.92837	NM_213593
NR0B2	-1.39338	0.123372	MPC1	51660	-1.39338	9.46008	13.4226	1.31323e-39	2.30063e-38	79.0154	NM_016098
NR0B2	-1.3966	0.116876	F2	2147	-1.3966	10.6942	9.41831	1.07299e-20	5.85093e-20	35.9233	NM_001311257
NR0B2	-1.39717	0.0913299	IVD	3712	-1.39717	6.95308	16.05	4.8909e-55	2.81809e-53	114.274	NM_002225
NR0B2	-1.40907	0.104875	HAL	3034	-1.40907	8.18641	6.64376	3.80227e-11	1.18882e-10	14.3246	NM_002108
NR0B2	-1.41143	0.103831	HMGCS2	3158	-1.41143	11.9894	7.43892	1.42407e-13	5.19169e-13	19.7901	NM_005518
NR0B2	-1.42393	0.093837	TMPRSS6	164656	-1.42393	7.65523	10.8705	7.0599e-27	5.54707e-26	49.9827	NM_153609
NR0B2	-1.4281	0.0906983	ASGR2	433	-1.4281	11.039	12.5471	5.56815e-35	7.32332e-34	68.4537	NM_080914
NR0B2	-1.43382	0.102296	TFR2	7036	-1.43382	8.60451	12.3566	5.21444e-34	6.46462e-33	66.2374	NM_003227
NR0B2	-1.44162	0.0839995	ECHS1	1892	-1.44162	11.9343	15.3066	1.91421e-50	7.3764e-49	103.774	NM_004092
NR0B2	-1.4471	0.104133	PCK2	5106	-1.4471	9.89986	10.6895	4.59488e-26	3.44474e-25	48.1306	NM_004563
NR0B2	-1.45791	0.100884	FETUB	26998	-1.45791	6.39693	10.9942	1.93202e-27	1.56896e-26	51.2643	NM_014375
NR0B2	-1.46497	0.124504	FAH	2184	-1.46497	9.01502	14.6757	1.09918e-46	3.16668e-45	95.1819	NM_000137
NR0B2	-1.46964	0.0911114	ACOX2	8309	-1.46964	10.0062	9.68431	9.07467e-22	5.35366e-21	38.3603	NM_003500
NR0B2	-1.48835	0.0901216	SULT1A2	6799	-1.48835	8.08209	13.7687	1.64509e-41	3.28476e-40	83.3591	NM_177528
NR0B2	-1.48894	0.0936863	CPT2	1376	-1.48894	8.46306	15.2289	5.65007e-50	2.11659e-48	102.699	NM_001330589
NR0B2	-1.50117	0.088603	ALDH4A1	8659	-1.50117	8.50208	13.7182	3.13714e-41	6.14229e-40	82.7189	NM_170726
NR0B2	-1.50394	0.0889152	PEMT	10400	-1.50394	8.53527	12.8503	1.49046e-36	2.13933e-35	72.0417	NM_148173
NR0B2	-1.53536	0.105188	DAO	1610	-1.53536	7.63913	9.88962	1.29247e-22	8.01173e-22	40.2841	NM_001917
NR0B2	-1.55639	0.103308	RIDA	10247	-1.55639	10.1918	11.7138	7.94435e-31	7.93779e-30	58.9793	NM_005836
NR0B2	-1.55956	0.0933002	CYP2D7	1564	-1.55956	9.59608	9.55089	3.15721e-21	1.79017e-20	37.1301	NM_001348386
NR0B2	-1.56402	0.119387	ANGPTL3	27329	-1.56402	9.79338	10.6955	4.31942e-26	3.24426e-25	48.1917	NM_014495
NR0B2	-1.57566	0.102175	TTR	7276	-1.57566	13.2891	8.96177	6.43707e-19	3.1974e-18	31.8874	NM_000371
NR0B2	-1.5839	0.102419	ITIH1	3697	-1.5839	11.7015	11.049	1.0828e-27	8.93104e-27	51.837	NM_002215
NR0B2	-1.5865	0.0914302	C1RL	51279	-1.5865	8.97685	17.0679	1.33091e-61	1.25812e-59	129.29	NM_016546
NR0B2	-1.59001	0.147423	XDH	7498	-1.59001	7.41193	11.3764	3.24316e-29	2.96168e-28	55.3079	NM_000379
NR0B2	-1.59439	0.0974301	ALDOB	229	-1.59439	10.4347	10.3923	9.37649e-25	6.53923e-24	45.1497	NM_000035
NR0B2	-1.5945	0.10994	SLC27A2	11001	-1.5945	10.25	9.45328	7.78222e-21	4.29584e-20	36.2401	NM_003645
NR0B2	-1.59992	0.0878817	RAB17	64284	-1.59992	8.94254	15.2897	2.42124e-50	9.27033e-49	103.54	NM_022449
NR0B2	-1.60889	0.0830696	NR1I2	8856	-1.60889	6.67294	15.5649	5.08182e-52	2.21187e-50	107.376	NM_033013
NR0B2	-1.64288	0.104554	NDRG2	57447	-1.64288	7.52958	17.4923	1.97002e-64	2.40781e-62	135.764	NM_201541
NR0B2	-1.64794	0.102588	HABP2	3026	-1.64794	10.1968	10.9358	3.56884e-27	2.85791e-26	50.6573	NM_004132
NR0B2	-1.6503	0.0900746	GPD1	2819	-1.6503	5.9026	16.6943	3.71978e-59	2.83078e-57	123.694	NM_005276
NR0B2	-1.65222	0.129152	ACADS	35	-1.65222	7.44852	18.7737	2.73823e-73	8.41513e-71	156.032	NM_001302554
NR0B2	-1.65445	0.119339	AGXT	189	-1.65445	10.8716	10.2426	4.1602e-24	2.79813e-23	43.6776	NM_000030
NR0B2	-1.66708	0.0918856	ITIH4	3700	-1.66708	8.73283	14.2667	2.56197e-44	6.13857e-43	89.7724	NM_002218
NR0B2	-1.67168	0.0890733	PRODH2	58510	-1.67168	8.36323	13.2545	1.06549e-38	1.75646e-37	76.9396	NM_021232
NR0B2	-1.69484	0.0958327	VNN1	8876	-1.69484	9.18337	8.79096	2.83962e-18	1.35647e-17	30.4255	NM_004666
NR0B2	-1.70091	0.0953762	PON3	5446	-1.70091	11.5883	12.3287	7.21685e-34	8.8117e-33	65.9154	NM_000940
NR0B2	-1.70312	0.0884432	TKFC	26007	-1.70312	7.2838	14.4279	3.03528e-45	7.88131e-44	91.8889	NM_015533
NR0B2	-1.71369	0.0949281	PBLD	64081	-1.71369	8.96527	14.2164	4.96552e-44	1.16666e-42	89.1158	NM_022129
NR0B2	-1.71687	0.12789	HSD17B2	3294	-1.71687	9.76474	11.1165	5.29623e-28	4.4627e-27	52.5444	NM_002153
NR0B2	-1.73561	0.0919305	ETFDH	2110	-1.73561	8.60531	15.5209	9.46208e-52	4.05997e-50	106.759	NM_004453
NR0B2	-1.75559	0.0995623	SORL1	6653	-1.75559	9.05539	16.7451	1.73701e-59	1.35599e-57	124.45	NM_003105
NR0B2	-1.78917	0.105626	CIDEB	27141	-1.78917	9.70596	13.2788	7.88454e-39	1.31048e-37	77.2382	NM_014430
NR0B2	-1.80882	0.108112	HRG	3273	-1.80882	11.6611	9.64425	1.32164e-21	7.72552e-21	37.9893	NM_000412
NR0B2	-1.80909	0.109451	GCKR	2646	-1.80909	7.35758	17.3586	1.55509e-63	1.77515e-61	133.711	NM_001486
NR0B2	-1.82206	0.0966831	HPX	3263	-1.82206	12.7405	11.3872	2.88484e-29	2.64244e-28	55.4238	NM_000613
NR0B2	-1.84648	0.126754	C8B	732	-1.84648	10.8802	12.549	5.44708e-35	7.17189e-34	68.4755	NM_001278544
NR0B2	-1.85335	0.100384	CYP4F2	8529	-1.85335	9.04708	14.3148	1.35834e-44	3.3137e-43	90.4019	NM_001082
NR0B2	-1.88135	0.0918013	AZGP1	563	-1.88135	11.4332	13.9666	1.28957e-42	2.81149e-41	85.8846	NM_001185
NR0B2	-1.90264	0.102511	TDO2	6999	-1.90264	9.82523	11.8993	9.9219e-32	1.04034e-30	61.039	NM_005651
NR0B2	-1.91794	0.0957808	SHBG	6462	-1.91794	6.41488	14.4618	1.93381e-45	5.10897e-44	92.3362	NM_001289116
NR0B2	-1.91928	0.0900732	LPA	4018	-1.91928	8.6006	14.3251	1.18508e-44	2.91453e-43	90.5373	NM_005577
NR0B2	-1.93565	0.133834	AKR7A3	22977	-1.93565	8.95352	14.6287	2.07124e-46	5.86932e-45	94.5531	NM_012067
NR0B2	-1.93818	0.131489	PON1	5444	-1.93818	9.51321	13.196	2.19594e-38	3.557e-37	76.2226	NM_000446
NR0B2	-1.96535	0.109803	SERPINA4	5267	-1.96535	8.87226	14.7686	3.13255e-47	9.52357e-46	96.4277	NM_006215
NR0B2	-1.99833	0.0972399	CYP4A22	284541	-1.99833	7.67521	13.8757	4.17077e-42	8.77676e-41	84.7203	NM_001308102
NR0B2	-2.05148	0.081246	RND3	390	-2.05148	9.22736	17.1658	2.99357e-62	2.87478e-60	130.772	NM_005168
NR0B2	-2.09025	0.0855743	FTCD	10841	-2.09025	8.95073	15.9575	1.86389e-54	1.0205e-52	112.945	NM_206965
NR0B2	-2.12211	0.143495	CYP2C8	1558	-2.12211	9.39758	13.94	1.81955e-42	3.93152e-41	85.5431	NM_001198855
NR0B2	-2.18743	0.085237	OGDHL	55753	-2.18743	8.03429	16.3015	1.24929e-56	7.99811e-55	117.916	NM_018245
NR0B2	-2.19569	0.111031	CYP4A11	1579	-2.19569	10.0584	13.8686	4.56918e-42	9.59846e-41	84.6298	NM_001319155
NR0B2	-2.28519	0.0932204	FBP1	2203	-2.28519	10.468	15.4686	1.97708e-51	8.33543e-50	106.027	NM_001127628
NR0B2	-2.33804	0.0902888	SPP2	6694	-2.33804	9.88344	11.9405	6.22627e-32	6.61439e-31	61.5004	NM_006944
NR0B2	-2.34323	0.100981	KLKB1	3818	-2.34323	9.75447	17.9818	9.2549e-68	1.57724e-65	143.379	NM_001318396
NR0B2	-2.42007	0.100951	FXYD1	5348	-2.42007	7.7891	15.8998	4.2787e-54	2.24122e-52	112.12	NM_021902
NR0B2	-2.47534	0.102549	GYS2	2998	-2.47534	8.08895	14.222	4.61546e-44	1.08652e-42	89.1883	NM_021957
NR0B2	-2.47692	0.112294	GHR	2690	-2.47692	9.89118	16.5197	4.99964e-58	3.49686e-56	121.113	NM_001242462
NR0B2	-2.52317	0.0885885	KMO	8564	-2.52317	7.79605	17.7517	3.46594e-66	4.9926e-64	139.778	NM_003679
NR0B2	-2.72986	0.100209	CYP39A1	51302	-2.72986	6.86713	18.9757	9.9855e-75	3.55366e-72	159.324	NM_016593
NR0B2	-2.87386	0.104285	GBA3	57733	-2.87386	8.42909	16.6631	5.92166e-59	4.39583e-57	123.232	NM_020973
NR0B2	-3.52543	0.114652	SLC22A1	6580	-3.52543	9.58167	15.7612	3.12051e-53	1.51639e-51	110.147	NM_153187
NR0B2	-3.81741	0.115638	APOF	319	-3.81741	8.75018	19.7993	1.04929e-80	7.05356e-78	173.009	NM_001638
NR1H4	1.3587	-0.133874	SLC52A2	79581	1.3587	5.55274	-12.9653	3.70556e-37	5.51505e-36	73.4213	NM_024531
NR1H4	1.25229	-0.100591	HRAS	3265	1.25229	6.33948	-11.7166	7.69977e-31	7.71251e-30	59.0103	NM_176795
NR1H4	1.19642	-0.098806	MAP7D1	55700	1.19642	6.5087	-9.7911	3.30812e-22	2.00844e-21	39.3563	NM_018067
NR1H4	1.15291	-0.125245	GDI1	2664	1.15291	7.96159	-7.02203	2.86555e-12	9.62073e-12	16.8509	NM_001493
NR1H4	1.13197	-0.137496	VGLL4	9686	1.13197	7.56173	-6.18937	7.12745e-10	2.04753e-09	11.4681	NM_014667
NR1H4	1.11497	0.0483205	UNC93A	54346	1.11497	5.28008	-3.59668	0.000329084	0.000597169	-1.04436	NM_018974
NR1H4	1.10984	-0.0963901	RHBDF2	79651	1.10984	6.35916	-6.72854	2.1546e-11	6.8625e-11	14.8791	NM_024599
NR1H4	1.10936	-0.0715712	EFHD2	79180	1.10936	7.3982	-5.81568	6.877e-09	1.84394e-08	9.26562	NM_024329
NR1H4	1.10869	0.0782134	GOLGA5	9950	1.10869	8.87066	-6.00079	2.27401e-09	6.31814e-09	10.34	NM_005113
NR1H4	1.09728	-0.147892	DDX27	55661	1.09728	7.4749	-4.77164	1.94158e-06	4.32973e-06	3.82079	NM_017895
NR1H4	1.09006	0.065646	TM4SF4	7104	1.09006	12.1297	-2.46257	0.0138672	0.0204575	-4.45688	NM_004617
NR1H4	1.0615	0.0403021	TEX2	55852	1.0615	7.99565	-3.76005	0.000174106	0.000324504	-0.44856	NM_018469
NR1H4	1.06073	0.0541851	SGK2	10110	1.06073	6.61505	-2.93455	0.00337333	0.00542146	-3.1907	NM_170693
NR1H4	1.05634	-0.132152	ARFGAP1	55738	1.05634	6.16858	-3.5097	0.000457209	0.000815723	-1.35088	NM_175609
NR1H4	1.04784	0.100361	CLDN1	9076	1.04784	9.85989	-1.58489	0.113128	0.143999	-6.22495	NM_021101
NR1H4	1.0429	0.126985	XBP1	7494	1.0429	10.4844	-1.98572	0.0471825	0.0642191	-5.51229	NM_005080
NR1H4	1.04077	-0.0903786	ZP3	7784	1.04077	5.33233	-2.13484	0.0328795	0.0458185	-5.20646	NM_007155
NR1H4	1.0406	-0.0836597	ARHGAP4	393	1.0406	5.42689	-2.29561	0.0217874	0.0311286	-4.85203	NM_001666
NR1H4	1.03718	-0.101857	CACNB3	784	1.03718	4.18107	-3.54119	0.000406227	0.000728847	-1.24077	NM_001206917
NR1H4	1.03111	0.0664125	TMBIM4	51643	1.03111	10.0391	-1.95839	0.0503041	0.0682147	-5.56594	NM_016056
NR1H4	1.02628	-0.101392	ATN1	1822	1.02628	4.40436	-3.31894	0.00091766	0.0015797	-1.99717	NM_001940
NR1H4	1.0262	-0.0460843	CALB2	794	1.0262	4.09772	-3.03274	0.00245045	0.00400736	-2.89966	NM_007088
NR1H4	1.0192	0.0833471	UHRF1BP1L	23074	1.0192	5.95771	-1.65877	0.0972981	0.125299	-6.10559	NM_015054
NR1H4	1.01888	0.124398	TMEM123	114908	1.01888	11.1803	-0.777037	0.437217	0.489845	-7.17577	NM_052932
NR1H4	1.01796	0.090638	MTM1	4534	1.01796	6.26053	-1.06682	0.286166	0.335914	-6.90944	NM_000252
NR1H4	1.01773	-0.123085	MAP4	4134	1.01773	6.23636	-1.56286	0.118222	0.149883	-6.25949	NM_030885
NR1H4	1.01183	0.100612	AGT	183	1.01183	12.9798	-0.507258	0.612022	0.657621	-7.34851	NM_000029
NR1H4	1.01049	-0.0515209	CALB1	793	1.01049	3.81984	-0.686887	0.492223	0.544067	-7.24156	NM_004929
NR1H4	1.00795	0.108409	MTO1	25821	1.00795	7.19623	-0.506064	0.61286	0.658229	-7.34911	NM_133645
NR1H4	1.00692	0.114311	HADHB	3032	1.00692	10.3088	-0.376077	0.706894	0.746033	-7.40628	NM_001281513
NR1H4	1.00582	-0.0786144	CRABP2	1382	1.00582	4.21964	-0.356811	0.721266	0.759161	-7.41332	NM_001878
NR1H4	-0.997909	0.0738949	CREG1	8804	-0.997909	11.1921	-0.079387	0.936732	0.946747	-7.47366	NM_003851
NR1H4	-1.00025	-0.0847015	RPL13P5	283345	-1.00025	4.58896	0.023688	0.981103	0.983868	-7.47653
NR1H4	-1.00055	0.0409394	SCARB1	949	-1.00055	7.47846	0.0335706	0.973222	0.978072	-7.47625	NM_005505
NR1H4	-1.00193	-0.084119	FBXO41	150726	-1.00193	4.1092	0.265531	0.790625	0.820625	-7.44165	NM_001080410
NR1H4	-1.00204	0.122622	LMBRD1	55788	-1.00204	9.07458	0.0901029	0.928213	0.939707	-7.47276	NM_018368
NR1H4	-1.00303	0.207073	SERPINA1	5265	-1.00303	10.8144	0.237401	0.812367	0.839341	-7.4487	NM_001127707
NR1H4	-1.00387	-0.103545	NBEAL2	23218	-1.00387	5.29413	0.295041	0.767989	0.800471	-7.4334	NM_015175
NR1H4	-1.00395	-0.0468641	SLC4A8	9498	-1.00395	3.99553	0.925933	0.354577	0.407522	-7.04937	NM_001267615
NR1H4	-1.00814	0.120173	APOA2	336	-1.00814	14.5501	0.234275	0.814792	0.841138	-7.44944	NM_001643
NR1H4	-1.00937	-0.0498694	BDNF	627	-1.00937	3.94806	1.1775	0.239117	0.285308	-6.78564	NM_170735
NR1H4	-1.00997	-0.0563401	MAP9	79884	-1.00997	3.97501	0.805039	0.42088	0.474182	-7.15369	NM_001039580
NR1H4	-1.01023	0.136306	C2	717	-1.01023	10.1844	0.350522	0.725979	0.763192	-7.41554	NM_001282459
NR1H4	-1.01207	-0.0905138	MBOAT2	129642	-1.01207	4.20474	0.81449	0.415448	0.468984	-7.14606	NM_138799
NR1H4	-1.0121	-0.0525318	ZDHHC8P1	150244	-1.0121	4.14486	1.6061	0.108388	0.138482	-6.19124
NR1H4	-1.01482	-0.0165109	TRPC4	7223	-1.01482	4.11366	2.2749	0.0230031	0.0327071	-4.89912	NM_016179
NR1H4	-1.01511	-0.0679619	RNASEH2B	79621	-1.01511	4.88544	1.05094	0.293398	0.343471	-6.9262	NM_024570
NR1H4	-1.01597	-0.101413	LPCAT4	254531	-1.01597	4.38116	1.93457	0.0531649	0.0718044	-5.61211	NM_153613
NR1H4	-1.01867	-0.09487	CHMP1A	5119	-1.01867	7.20132	1.16536	0.243993	0.290411	-6.79981	NM_002768
NR1H4	-1.02349	-0.0250675	PHKA1	5255	-1.02349	4.45179	2.22214	0.0263705	0.0372022	-5.01718	NM_002637
NR1H4	-1.0244	0.0730414	APMAP	57136	-1.0244	9.0381	1.18882	0.234634	0.280475	-6.77229	NM_020531
NR1H4	-1.02604	0.120263	F5	2153	-1.02604	10.852	0.777043	0.437213	0.489845	-7.17577	NM_000130
NR1H4	-1.02739	0.134114	SAR1B	51128	-1.02739	8.83971	1.23723	0.216129	0.260493	-6.71377	NM_016103
NR1H4	-1.02772	0.0569208	OSBPL9	114883	-1.02772	9.22656	1.74424	0.0812502	0.106192	-5.96074	NM_148909
NR1H4	-1.0288	0.0501535	TSPAN7	7102	-1.0288	6.83603	0.871275	0.383695	0.436878	-7.09834	NM_004615
NR1H4	-1.02892	0.153583	ETFA	2108	-1.02892	10.8026	1.11275	0.265931	0.314296	-6.85954	NM_001127716
NR1H4	-1.02957	0.149687	PRDX3	10935	-1.02957	8.28574	1.32092	0.186659	0.227771	-6.60709	NM_006793
NR1H4	-1.03312	0.0597956	PPP2R1B	5519	-1.03312	7.42622	1.48584	0.137457	0.17232	-6.37646	NM_181700
NR1H4	-1.03338	-0.0362254	UGT8	7368	-1.03338	3.99638	2.71342	0.0067088	0.01037	-3.81132	NM_003360
NR1H4	-1.03382	-0.0880316	C11orf63	79864	-1.03382	4.17336	4.4857	7.62411e-06	1.6176e-05	2.51304
NR1H4	-1.0427	0.091914	APOE	348	-1.0427	10.8757	2.55341	0.0107313	0.0161263	-4.2303	NM_001302691
NR1H4	-1.04349	0.105545	IDH1	3417	-1.04349	10.8684	2.00829	0.044729	0.061148	-5.46742	NM_005896
NR1H4	-1.05376	-0.0589755	TMEM159	57146	-1.05376	4.39483	4.90527	9.98089e-07	2.2821e-06	4.45908	NM_020422
NR1H4	-1.05446	0.135006	GGCX	2677	-1.05446	8.00074	2.7762	0.00554429	0.00865737	-3.64004	NM_001311312
NR1H4	-1.06093	0.0580429	INHBE	83729	-1.06093	9.40588	1.14961	0.250423	0.297333	-6.81798	NM_031479
NR1H4	-1.06179	0.135981	EPAS1	2034	-1.06179	8.03008	3.21917	0.00130347	0.00220372	-2.32092	NM_001430
NR1H4	-1.06247	0.0405673	ABCA1	19	-1.06247	8.30926	3.50139	0.000471625	0.000840371	-1.37977	NM_005502
NR1H4	-1.06961	0.157347	ECI2	10455	-1.06961	9.92903	2.6729	0.00757294	0.0116182	-3.91982	NM_206836
NR1H4	-1.07454	0.0652155	KANK1	23189	-1.07454	7.50168	4.3765	1.25975e-05	2.61682e-05	2.03457	NM_153186
NR1H4	-1.08987	0.173346	PGRMC1	10857	-1.08987	11.4823	2.92064	0.00352706	0.00565864	-3.23117	NM_006667
NR1H4	-1.09385	0.168248	PID1	55022	-1.09385	7.1048	3.60657	0.000316857	0.000575671	-1.00901	NM_017933
NR1H4	-1.09813	0.171942	PDIA5	10954	-1.09813	9.18339	4.21532	2.59039e-05	5.24318e-05	1.34952	NM_006810
NR1H4	-1.09839	0.155348	ACOT1	641371	-1.09839	8.01489	3.33124	0.000878222	0.00151634	-1.95655	NM_001037161
NR1H4	-1.10327	0.0880195	PYGL	5836	-1.10327	9.43647	3.72027	0.000203766	0.000377056	-0.596045	NM_002863
NR1H4	-1.10615	0.0957089	TNFSF10	8743	-1.10615	9.35297	3.26146	0.00112454	0.00191755	-2.18487	NM_003810
NR1H4	-1.10738	0.0425778	VNN3	55350	-1.10738	5.94552	3.16313	0.00158113	0.00264945	-2.49848	NM_001291703
NR1H4	-1.10991	0.208835	CFHR1	3078	-1.10991	12.4011	2.70499	0.00688091	0.0106198	-3.83403	NM_002113
NR1H4	-1.11838	0.163011	ST6GAL1	6480	-1.11838	7.94695	4.72811	2.40291e-06	5.30884e-06	3.61658	NM_173217
NR1H4	-1.11927	0.248908	C3	718	-1.11927	12.3151	4.45591	8.75316e-06	1.84775e-05	2.38137	NM_000064
NR1H4	-1.12725	0.216778	C4BPB	725	-1.12725	10.2789	3.34862	0.000825221	0.00143075	-1.89897	NM_001017367
NR1H4	-1.13567	0.201075	ITIH2	3698	-1.13567	12.8946	3.76059	0.000173734	0.000323961	-0.446556	NM_002216
NR1H4	-1.14625	0.168002	SLC35D1	23169	-1.14625	7.29783	6.35448	2.51213e-10	7.42833e-10	12.4834	NM_015139
NR1H4	-1.14655	0.249688	SERPINA6	866	-1.14655	10.1929	3.33473	0.000867328	0.0014986	-1.94501	NM_001756
NR1H4	-1.15692	0.238634	CYB5A	1528	-1.15692	10.7398	5.13223	3.10255e-07	7.40305e-07	5.58273	NM_148923
NR1H4	-1.15692	0.186889	F13B	2165	-1.15692	8.71216	2.98831	0.00283484	0.00460424	-3.03252	NM_001994
NR1H4	-1.15779	0.0684118	C4orf19	55286	-1.15779	6.98095	5.51345	3.91117e-08	9.92975e-08	7.58176	NM_018302
NR1H4	-1.15854	0.166042	VTN	7448	-1.15854	11.8931	5.38725	7.88082e-08	1.9629e-07	6.90455	NM_000638
NR1H4	-1.15986	0.152695	PALMD	54873	-1.15986	6.96944	5.28338	1.38727e-07	3.39798e-07	6.35862	NM_017734
NR1H4	-1.16003	0.112902	UGT2B4	7363	-1.16003	11.5326	3.51042	0.000455979	0.000813888	-1.34837	NM_021139
NR1H4	-1.16176	0.113194	C4A	720	-1.16176	9.95694	5.78423	8.27344e-09	2.20504e-08	9.08631	NM_007293
NR1H4	-1.16448	0.0879357	SLC2A10	81031	-1.16448	8.59433	4.5409	5.88982e-06	1.26069e-05	2.75931	NM_030777
NR1H4	-1.1713	0.273265	GC	2638	-1.1713	13.7507	4.79413	1.73788e-06	3.89269e-06	3.92702	NM_001204307
NR1H4	-1.17853	0.124824	LBP	3929	-1.17853	11.0495	3.29429	0.00100164	0.00171718	-2.07807	NM_004139
NR1H4	-1.17887	0.233528	SERPIND1	3053	-1.17887	11.89	3.90074	9.86418e-05	0.000188736	0.0854837	NM_000185
NR1H4	-1.17916	0.14243	APOC1	341	-1.17916	13.7278	7.85947	5.86848e-15	2.32586e-14	22.9186	NM_001645
NR1H4	-1.18434	0.127914	EDEM1	9695	-1.18434	8.37492	8.48627	3.75832e-17	1.67683e-16	27.883	NM_014674
NR1H4	-1.19104	0.133007	FMO5	2330	-1.19104	9.65459	4.6751	3.1077e-06	6.78634e-06	3.37038	NM_001461
NR1H4	-1.1924	0.130836	ABCD3	5825	-1.1924	9.22155	8.77445	3.2733e-18	1.55749e-17	30.2855	NM_002858
NR1H4	-1.202	0.240841	CFHR2	3080	-1.202	12.361	4.16394	3.24295e-05	6.49772e-05	1.13649	NM_005666
NR1H4	-1.20443	0.0802293	DPYD	1806	-1.20443	7.81363	7.75044	1.36234e-14	5.29362e-14	22.0919	NM_001160301
NR1H4	-1.2066	0.162194	C5	727	-1.2066	12.289	6.00908	2.16242e-09	6.01639e-09	10.3889	NM_001735
NR1H4	-1.2073	0.164599	CFB	629	-1.2073	10.7193	7.79651	9.55648e-15	3.74218e-14	22.4399	NM_001710
NR1H4	-1.20759	0.154573	ISOC1	51015	-1.20759	9.78719	7.78462	1.04746e-14	4.09377e-14	22.3498	NM_016048
NR1H4	-1.20868	0.156045	CFH	3075	-1.20868	12.05	5.85762	5.36699e-09	1.45119e-08	9.50616	NM_001014975
NR1H4	-1.21119	0.137971	ALB	213	-1.21119	12.8954	7.01459	3.01881e-12	1.01184e-11	16.7999	NM_000477
NR1H4	-1.22962	0.131237	PCBD1	5092	-1.22962	9.50126	7.32886	3.19456e-13	1.1399e-12	18.9985	NM_001289797
NR1H4	-1.22991	0.137378	APOB	338	-1.22991	13.2099	5.81408	6.94217e-09	1.86088e-08	9.25647	NM_000384
NR1H4	-1.23039	0.11614	SLC31A1	1317	-1.23039	8.48182	9.64286	1.33896e-21	7.82301e-21	37.9765	NM_001859
NR1H4	-1.23457	0.132728	SLC6A1	6529	-1.23457	9.32427	4.82226	1.51195e-06	3.40237e-06	4.06055	NM_003042
NR1H4	-1.23835	0.122738	CLU	1191	-1.23835	9.28703	9.80378	2.93245e-22	1.78305e-21	39.4753	NM_001831
NR1H4	-1.24734	0.0970252	A1CF	29974	-1.24734	10.6772	8.84563	1.77083e-18	8.5777e-18	30.8905	NM_138933
NR1H4	-1.25537	0.206742	PHYH	5264	-1.25537	11.0083	7.95679	2.74196e-15	1.10592e-14	23.6658	NM_006214
NR1H4	-1.25837	0.256003	ORM1	5004	-1.25837	13.684	6.01044	2.14463e-09	5.96827e-09	10.3969	NM_000607
NR1H4	-1.26029	0.149495	CYP2D6	1565	-1.26029	7.02649	8.09719	9.00999e-16	3.72466e-15	24.7591	NM_001025161
NR1H4	-1.26269	0.142476	SELENOP	6414	-1.26269	10.918	9.63365	1.45953e-21	8.50681e-21	37.8914	NM_005410
NR1H4	-1.26775	0.137652	RETSAT	54884	-1.26775	8.38725	9.31634	2.72076e-20	1.45733e-19	35.0057	NM_017750
NR1H4	-1.2682	0.249632	AADAC	13	-1.2682	11.1205	5.6694	1.61213e-08	4.21222e-08	8.43971	NM_001086
NR1H4	-1.27076	0.125216	SLC25A20	788	-1.27076	8.38668	9.31829	2.67294e-20	1.43363e-19	35.0232	NM_000387
NR1H4	-1.27137	0.203451	KNG1	3827	-1.27137	12.3829	5.21285	2.02501e-07	4.90738e-07	5.99383	NM_001166451
NR1H4	-1.27473	0.18254	PECR	55825	-1.27473	9.1824	7.76665	1.20288e-14	4.68452e-14	22.2141	NM_018441
NR1H4	-1.27715	0.162761	PLPP3	8613	-1.27715	9.16639	8.36522	1.02468e-16	4.46315e-16	26.8964	NM_003713
NR1H4	-1.27987	0.138829	TF	7018	-1.27987	12.1118	7.57638	5.11124e-14	1.92128e-13	20.7947	NM_001354704
NR1H4	-1.28324	0.122468	SCP2	6342	-1.28324	10.4725	10.8737	6.83205e-27	5.37851e-26	50.0151	NM_002979
NR1H4	-1.28752	0.132955	NAT8	9027	-1.28752	7.94867	5.8659	5.10953e-09	1.38498e-08	9.55387	NM_003960
NR1H4	-1.29999	0.171312	APOH	350	-1.29999	13.2001	7.14046	1.24131e-12	4.2658e-12	17.6694	NM_000042
NR1H4	-1.30121	0.115087	SERPINA3	12	-1.30121	13.2461	7.03786	2.56419e-12	8.63293e-12	16.9596	NM_001085
NR1H4	-1.30254	0.110305	FGL1	2267	-1.30254	11.7277	6.5392	7.59129e-11	2.3337e-10	13.65	NM_201553
NR1H4	-1.30287	0.0970214	GLDC	2731	-1.30287	9.60869	6.26928	4.31622e-10	1.25907e-09	11.9563	NM_000170
NR1H4	-1.30468	0.206574	GATM	2628	-1.30468	10.1113	7.52193	7.68605e-14	2.85367e-13	20.3947	NM_001482
NR1H4	-1.31249	0.179285	PXMP2	5827	-1.31249	9.16257	8.39803	7.81805e-17	3.425e-16	27.1624	NM_018663
NR1H4	-1.31485	0.149567	BDH1	622	-1.31485	7.65967	8.26354	2.35544e-16	1.00532e-15	26.0779	NM_203315
NR1H4	-1.31984	0.148138	CP	1356	-1.31984	9.72356	6.9179	5.9156e-12	1.94772e-11	16.1421	NM_000096
NR1H4	-1.327	0.124262	GSTA1	2938	-1.327	9.51057	6.95887	4.45297e-12	1.47903e-11	16.4198	NM_145740
NR1H4	-1.33555	0.133161	MASP1	5648	-1.33555	6.30632	12.1232	7.76341e-33	8.87037e-32	63.5623	NM_139125
NR1H4	-1.34118	0.20441	MARC2	54996	-1.34118	9.45885	10.3215	1.90163e-24	1.30072e-23	44.451
NR1H4	-1.34641	0.194582	AMBP	259	-1.34641	9.49579	11.669	1.30635e-30	1.28616e-29	58.4869	NM_001633
NR1H4	-1.35012	0.155704	SHMT1	6470	-1.35012	6.93321	11.9918	3.48154e-32	3.77479e-31	62.0761	NM_148918
NR1H4	-1.35169	0.148546	MUT	4594	-1.35169	9.68894	12.2205	2.53046e-33	2.99009e-32	64.6727
NR1H4	-1.35334	0.209276	ACAT1	38	-1.35334	10.3112	10.571	1.54257e-25	1.1217e-24	46.9334	NM_000019
NR1H4	-1.35349	0.10391	ETS2	2114	-1.35349	8.62561	10.4493	5.28826e-25	3.73543e-24	45.7157	NM_005239
NR1H4	-1.35947	0.171351	CPB2	1361	-1.35947	12.0786	8.27403	2.16266e-16	9.26635e-16	26.1618	NM_001872
NR1H4	-1.36023	0.152403	SERPING1	710	-1.36023	11.5108	11.6196	2.25897e-30	2.19195e-29	57.9448	NM_001032295
NR1H4	-1.36137	0.102206	AGTR1	185	-1.36137	8.7191	8.33337	1.33129e-16	5.76129e-16	26.6389	NM_032049
NR1H4	-1.36168	0.153774	KHK	3795	-1.36168	7.73235	9.52963	3.84524e-21	2.16911e-20	36.9356	NM_006488
NR1H4	-1.36302	0.177501	FGG	2266	-1.36302	12.0516	8.85333	1.65661e-18	8.04051e-18	30.9562	NM_021870
NR1H4	-1.3638	0.174139	SERPINC1	462	-1.3638	12.8576	5.54227	3.32593e-08	8.50279e-08	7.73857	NM_000488
NR1H4	-1.36449	0.16146	APOC3	345	-1.36449	13.021	6.83626	1.03703e-11	3.36048e-11	15.5934	NM_000040
NR1H4	-1.36954	0.0884925	NR0B2	8431	-1.36954	7.71798	7.88822	4.69112e-15	1.86842e-14	23.1384	NM_021969
NR1H4	-1.3702	0.140155	HPN	3249	-1.3702	9.48965	11.1341	4.3912e-28	3.71044e-27	52.7298	NM_182983
NR1H4	-1.38291	0.118232	DIO1	1733	-1.38291	9.67217	5.75639	9.73702e-09	2.58486e-08	8.92837	NM_213593
NR1H4	-1.38586	0.161168	PGM1	5236	-1.38586	10.7816	10.8627	7.6622e-27	6.01639e-26	49.9017	NM_002633
NR1H4	-1.39004	0.110798	PAH	5053	-1.39004	8.92024	11.5101	7.54593e-30	7.11658e-29	56.751	NM_001354304
NR1H4	-1.39292	0.176751	FGA	2243	-1.39292	12.5112	9.24735	5.07948e-20	2.68158e-19	34.3902	NM_021871
NR1H4	-1.39338	0.157935	MPC1	51660	-1.39338	9.46008	13.4226	1.31323e-39	2.30063e-38	79.0154	NM_016098
NR1H4	-1.39539	0.150557	CRYL1	51084	-1.39539	9.42644	9.43081	9.56742e-21	5.24581e-20	36.0364	NM_015974
NR1H4	-1.3966	0.157426	F2	2147	-1.3966	10.6942	9.41831	1.07299e-20	5.85093e-20	35.9233	NM_001311257
NR1H4	-1.39838	0.149191	AHSG	197	-1.39838	13.3117	6.92866	5.4915e-12	1.81302e-11	16.2148	NM_001622
NR1H4	-1.40354	0.132075	ACAA2	10449	-1.40354	8.62964	12.7704	3.89758e-36	5.4521e-35	71.089	NM_006111
NR1H4	-1.40507	0.137873	SLC39A14	23516	-1.40507	9.56525	12.935	5.35088e-37	7.88619e-36	73.0571	NM_015359
NR1H4	-1.40748	0.0907815	APOA1	335	-1.40748	12.9296	7.58615	4.74894e-14	1.78732e-13	20.8668	NM_001318021
NR1H4	-1.41143	0.196366	HMGCS2	3158	-1.41143	11.9894	7.43892	1.42407e-13	5.19169e-13	19.7901	NM_005518
NR1H4	-1.42473	0.137739	BCKDHB	594	-1.42473	6.94385	13.2168	1.69733e-38	2.77162e-37	76.478	NM_183050
NR1H4	-1.42771	0.166609	BAAT	570	-1.42771	11.028	7.29445	4.10335e-13	1.45432e-12	18.7532	NM_001701
NR1H4	-1.4281	0.142631	ASGR2	433	-1.4281	11.039	12.5471	5.56815e-35	7.32332e-34	68.4537	NM_080914
NR1H4	-1.43643	0.178226	C1S	716	-1.43643	11.3729	9.29052	3.43843e-20	1.83282e-19	34.7749	NM_201442
NR1H4	-1.4471	0.143076	PCK2	5106	-1.4471	9.89986	10.6895	4.59488e-26	3.44474e-25	48.1306	NM_004563
NR1H4	-1.44727	0.127639	ASGR1	432	-1.44727	11.0254	11.057	9.94835e-28	8.23358e-27	51.9208	NM_001671
NR1H4	-1.46964	0.167263	ACOX2	8309	-1.46964	10.0062	9.68431	9.07467e-22	5.35366e-21	38.3603	NM_003500
NR1H4	-1.47313	0.151066	FGB	2244	-1.47313	13.5259	9.7296	5.92233e-22	3.54227e-21	38.7815	NM_005141
NR1H4	-1.47606	0.157716	CPN1	1369	-1.47606	8.39393	9.4266	9.94482e-21	5.43752e-20	35.9983	NM_001308
NR1H4	-1.47678	0.166408	RBP4	5950	-1.47678	10.9542	12.3559	5.25636e-34	6.50891e-33	66.2295	NM_006744
NR1H4	-1.49402	0.116798	SERPINA7	6906	-1.49402	10.6129	7.37286	2.31582e-13	8.33722e-13	19.3136	NM_000354
NR1H4	-1.49463	0.0994096	PROS1	5627	-1.49463	11.2037	13.7246	2.88888e-41	5.67458e-40	82.8006	NM_001314077
NR1H4	-1.50853	0.161056	CAT	847	-1.50853	9.64095	14.8729	7.58427e-48	2.40235e-46	97.8354	NM_001752
NR1H4	-1.509	0.113883	SERPINA10	51156	-1.509	10.6359	11.1552	3.50451e-28	2.97785e-27	52.9529	NM_016186
NR1H4	-1.52881	0.2069	RGN	9104	-1.52881	9.67892	10.9424	3.32783e-27	2.67021e-26	50.7265	NM_152869
NR1H4	-1.53477	0.165335	CYP4F3	4051	-1.53477	9.20474	11.4581	1.3331e-29	1.24081e-28	56.1877	NM_001199209
NR1H4	-1.53536	0.131049	DAO	1610	-1.53536	7.63913	9.88962	1.29247e-22	8.01173e-22	40.2841	NM_001917
NR1H4	-1.54034	0.14996	SLC2A2	6514	-1.54034	11.4183	8.88203	1.29117e-18	6.28953e-18	31.2017	NM_001278659
NR1H4	-1.54137	0.157883	C1R	715	-1.54137	10.2536	12.5047	9.19191e-35	1.19465e-33	67.957	NM_001733
NR1H4	-1.5471	0.15782	EHHADH	1962	-1.5471	10.1398	10.3528	1.39175e-24	9.62848e-24	44.7595	NM_001966
NR1H4	-1.5523	0.132	CDO1	1036	-1.5523	10.3334	9.08537	2.16382e-19	1.10195e-18	32.9616	NM_001801
NR1H4	-1.55349	0.146253	CPN2	1370	-1.55349	9.9667	10.3948	9.14002e-25	6.38166e-24	45.175	NM_001291988
NR1H4	-1.55538	0.153525	C4BPA	722	-1.55538	12.5832	9.12016	1.5881e-19	8.14581e-19	33.2665	NM_000715
NR1H4	-1.55639	0.142477	RIDA	10247	-1.55639	10.1918	11.7138	7.94435e-31	7.93779e-30	58.9793	NM_005836
NR1H4	-1.55956	0.101499	CYP2D7	1564	-1.55956	9.59608	9.55089	3.15721e-21	1.79017e-20	37.1301	NM_001348386
NR1H4	-1.56379	0.13198	ARG1	383	-1.56379	10.0794	9.37761	1.55731e-20	8.43485e-20	35.5559	NM_001244438
NR1H4	-1.56402	0.200162	ANGPTL3	27329	-1.56402	9.79338	10.6955	4.31942e-26	3.24426e-25	48.1917	NM_014495
NR1H4	-1.57566	0.144555	TTR	7276	-1.57566	13.2891	8.96177	6.43707e-19	3.1974e-18	31.8874	NM_000371
NR1H4	-1.5839	0.162211	ITIH1	3697	-1.5839	11.7015	11.049	1.0828e-27	8.93104e-27	51.837	NM_002215
NR1H4	-1.5865	0.146153	C1RL	51279	-1.5865	8.97685	17.0679	1.33091e-61	1.25812e-59	129.29	NM_016546
NR1H4	-1.59439	0.141407	ALDOB	229	-1.59439	10.4347	10.3923	9.37649e-25	6.53923e-24	45.1497	NM_000035
NR1H4	-1.5945	0.170542	SLC27A2	11001	-1.5945	10.25	9.45328	7.78222e-21	4.29584e-20	36.2401	NM_003645
NR1H4	-1.59521	0.107734	PIPOX	51268	-1.59521	10.5834	11.1802	2.68487e-28	2.30077e-27	53.2165	NM_016518
NR1H4	-1.597	0.137658	ACAA1	30	-1.597	10.2162	15.4018	5.05062e-51	2.06461e-49	105.096	NM_001607
NR1H4	-1.61401	0.118706	GSTA2	2939	-1.61401	11.6398	8.19859	3.98902e-16	1.68354e-15	25.5599	NM_000846
NR1H4	-1.62148	0.116138	SERPINF2	5345	-1.62148	10.4657	12.5198	7.68456e-35	1.00414e-33	68.1345	NM_001165921
NR1H4	-1.62769	0.15058	ALDH2	217	-1.62769	12.1721	15.9389	2.43554e-54	1.31563e-52	112.68	NM_001204889
NR1H4	-1.6396	0.119264	HP	3240	-1.6396	14.1115	9.51449	4.42417e-21	2.4818e-20	36.7972	NM_005143
NR1H4	-1.64035	0.208376	HSD17B6	8630	-1.64035	11.5754	7.98267	2.23643e-15	9.06254e-15	23.866	NM_003725
NR1H4	-1.65445	0.154859	AGXT	189	-1.65445	10.8716	10.2426	4.1602e-24	2.79813e-23	43.6776	NM_000030
NR1H4	-1.66708	0.100895	ITIH4	3700	-1.66708	8.73283	14.2667	2.56197e-44	6.13857e-43	89.7724	NM_002218
NR1H4	-1.67842	0.205631	CFI	3426	-1.67842	11.1635	14.8034	1.95371e-47	6.03058e-46	96.8963	NM_001331035
NR1H4	-1.69148	0.111289	APCS	325	-1.69148	12.3062	9.55508	3.03666e-21	1.72586e-20	37.1685	NM_001639
NR1H4	-1.71369	0.175493	PBLD	64081	-1.71369	8.96527	14.2164	4.96552e-44	1.16666e-42	89.1158	NM_022129
NR1H4	-1.71687	0.121128	HSD17B2	3294	-1.71687	9.76474	11.1165	5.29623e-28	4.4627e-27	52.5444	NM_002153
NR1H4	-1.71822	0.117714	CYP2C18	1562	-1.71822	8.94109	10.8827	6.21411e-27	4.90161e-26	50.1089	NM_001128925
NR1H4	-1.72195	0.144582	G6PC	2538	-1.72195	10.1315	9.94595	7.5233e-23	4.72158e-22	40.8183	NM_001270397
NR1H4	-1.73199	0.124936	SULT2A1	6822	-1.73199	11.4724	9.84415	1.99648e-22	1.22378e-21	39.8548	NM_003167
NR1H4	-1.7354	0.141144	CYP2J2	1573	-1.7354	9.61516	13.5624	2.2635e-40	4.16871e-39	80.7589	NM_000775
NR1H4	-1.73561	0.14622	ETFDH	2110	-1.73561	8.60531	15.5209	9.46208e-52	4.05997e-50	106.759	NM_004453
NR1H4	-1.73597	0.153668	DPYS	1807	-1.73597	11.1684	10.98	2.24351e-27	1.81097e-26	51.1164	NM_001385
NR1H4	-1.74084	0.135215	SLCO1B1	10599	-1.74084	8.95367	12.5069	8.95145e-35	1.1659e-33	67.9833	NM_006446
NR1H4	-1.78917	0.166512	CIDEB	27141	-1.78917	9.70596	13.2788	7.88454e-39	1.31048e-37	77.2382	NM_014430
NR1H4	-1.81055	0.21319	PLG	5340	-1.81055	11.6009	11.0834	7.52581e-28	6.29318e-27	52.1969	NM_001168338
NR1H4	-1.82206	0.252265	HPX	3263	-1.82206	12.7405	11.3872	2.88484e-29	2.64244e-28	55.4238	NM_000613
NR1H4	-1.84109	0.117489	CA2	760	-1.84109	9.28232	12.4192	2.50905e-34	3.16905e-33	66.9621	NM_001293675
NR1H4	-1.84648	0.253259	C8B	732	-1.84648	10.8802	12.549	5.44708e-35	7.17189e-34	68.4755	NM_001278544
NR1H4	-1.85832	0.143905	F11	2160	-1.85832	7.34401	16.7833	9.80543e-60	7.80564e-58	125.018	NM_001354804
NR1H4	-1.85847	0.131448	EPHX2	2053	-1.85847	8.80763	13.9766	1.13344e-42	2.48453e-41	86.0127	NM_001979
NR1H4	-1.87938	0.111443	SLC17A2	10246	-1.87938	9.14758	13.2984	6.1784e-39	1.03115e-37	77.4799	NM_005835
NR1H4	-1.90264	0.12941	TDO2	6999	-1.90264	9.82523	11.8993	9.9219e-32	1.04034e-30	61.039	NM_005651
NR1H4	-1.91928	0.188167	LPA	4018	-1.91928	8.6006	14.3251	1.18508e-44	2.91453e-43	90.5373	NM_005577
NR1H4	-1.9686	0.151853	ADH1A	124	-1.9686	12.5946	11.6831	1.11765e-30	1.10577e-29	58.6414	NM_000667
NR1H4	-1.97269	0.149059	MAT1A	4143	-1.97269	10.9465	16.0142	8.21942e-55	4.62581e-53	113.758	NM_000429
NR1H4	-1.99144	0.161129	ADH6	130	-1.99144	9.24948	14.7128	6.66059e-47	1.96569e-45	95.679	NM_001102470
NR1H4	-2.12211	0.125839	CYP2C8	1558	-2.12211	9.39758	13.94	1.81955e-42	3.93152e-41	85.5431	NM_001198855
NR1H4	-2.12366	0.10243	MBL2	4153	-2.12366	9.70412	12.5607	4.74256e-35	6.29221e-34	68.6127	NM_000242
NR1H4	-2.28519	0.113139	FBP1	2203	-2.28519	10.468	15.4686	1.97708e-51	8.33543e-50	106.027	NM_001127628
NR1H4	-2.28531	0.139594	CYP2C9	1559	-2.28531	9.96408	14.5494	5.99846e-46	1.66471e-44	93.4978	NM_000771
NR1H4	-2.36321	0.183302	ALDH8A1	64577	-2.36321	9.7457	17.0643	1.40605e-61	1.31885e-59	129.235	NM_170771
NR1H4	-2.39851	0.147505	C8A	731	-2.39851	10.9524	16.0214	7.3967e-55	4.2217e-53	113.863	NM_000562
NR1H4	-2.40209	0.149775	C6	729	-2.40209	10.9857	14.4874	1.37435e-45	3.67914e-44	92.6751	NM_001115131
NR1H4	-2.47692	0.12195	GHR	2690	-2.47692	9.89118	16.5197	4.99964e-58	3.49686e-56	121.113	NM_001242462
NR1I2	1.61426	-0.268903	LAMC1	3915	1.61426	8.52554	-15.7471	3.81515e-53	1.83918e-51	109.947	NM_002293
NR1I2	1.38284	-0.153127	PNMA1	9240	1.38284	6.73256	-12.9131	6.9785e-37	1.02227e-35	72.7939	NM_006029
NR1I2	1.30965	-0.159625	KDM5B	10765	1.30965	6.10753	-12.5085	8.78189e-35	1.14505e-33	68.0023	NM_006618
NR1I2	1.27545	-0.134411	PTP4A3	11156	1.27545	4.8408	-11.1968	2.24702e-28	1.93516e-27	53.3926	NM_032611
NR1I2	1.2504	-0.200845	NAP1L1	4673	1.2504	8.57742	-12.16	5.08425e-33	5.8814e-32	63.9815	NM_139207
NR1I2	1.22451	-0.232892	STX6	10228	1.22451	5.15627	-14.4828	1.46022e-45	3.89177e-44	92.615	NM_005819
NR1I2	1.21898	-0.153345	PABPC1	26986	1.21898	10.7831	-10.3508	1.42002e-24	9.81281e-24	44.7396	NM_002568
NR1I2	1.21758	-0.200506	CAMSAP2	23271	1.21758	6.53045	-9.9223	9.44496e-23	5.88486e-22	40.5937	NM_203459
NR1I2	1.21439	-0.168682	PHIP	55023	1.21439	7.4453	-10.1559	9.77047e-24	6.41121e-23	42.8342	NM_017934
NR1I2	1.20931	-0.151888	IFNGR2	3460	1.20931	8.59913	-9.9228	9.40021e-23	5.85999e-22	40.5984	NM_005534
NR1I2	1.2035	-0.105427	ITGA2	3673	1.2035	4.75956	-6.86114	8.7455e-12	2.84923e-11	15.76	NM_002203
NR1I2	1.19356	-0.0860233	LEF1	51176	1.19356	4.60604	-9.33045	2.39333e-20	1.28765e-19	35.1322	NM_016269
NR1I2	1.1819	-0.124147	ARPC2	10109	1.1819	9.31167	-12.4331	2.13251e-34	2.70192e-33	67.1232	NM_152862
NR1I2	1.1713	-0.124984	EIF3E	3646	1.1713	11.0063	-8.06827	1.13486e-15	4.67226e-15	24.5324	NM_001568
NR1I2	1.16888	-0.0720741	HIST3H2A	92815	1.16888	4.63626	-8.46258	4.57802e-17	2.03132e-16	27.6889	NM_033445
NR1I2	1.16876	-0.122854	CBX6	23466	1.16876	6.19013	-7.76342	1.23311e-14	4.79918e-14	22.1897	NM_014292
NR1I2	1.1517	-0.155288	PTBP3	9991	1.1517	6.38289	-9.53113	3.7922e-21	2.14019e-20	36.9493	NM_005156
NR1I2	1.10901	-0.163656	RPS19	6223	1.10901	11.0146	-9.00626	4.3542e-19	2.18342e-18	32.2725	NM_001321485
NR1I2	1.08475	-0.123198	ANP32B	10541	1.08475	10.7986	-5.35228	9.54429e-08	2.36603e-07	6.71959	NM_006401
NR1I2	1.03321	-0.0911359	ZNF124	7678	1.03321	5.20738	-1.50795	0.131704	0.165691	-6.34349	NM_003431
NR1I2	1.02595	-0.0974683	ITGAE	3682	1.02595	7.39358	-1.25261	0.210476	0.254294	-6.69469	NM_002208
NR1I2	1.0252	-0.0481128	PRSS16	10279	1.0252	3.99906	-1.87278	0.0612248	0.0819581	-5.72923	NM_005865
NR1I2	1.0238	-0.0401828	TESMIN	9633	1.0238	3.97927	-3.5813	0.000348966	0.000631259	-1.09911	NM_004923
NR1I2	1.00955	-0.0513404	PTPN14	5784	1.00955	4.68238	-0.691726	0.489179	0.541098	-7.23824	NM_005401
NR1I2	-1.0351	0.0455973	MEP1B	4225	-1.0351	3.98887	2.321	0.0203739	0.0292575	-4.79373	NM_005925
NR1I2	-1.03619	0.0573497	KALRN	8997	-1.03619	4.62371	3.40403	0.000675351	0.00118345	-1.71331	NM_007064
NR1I2	-1.07367	0.187174	ACOX1	51	-1.07367	6.5487	4.74136	2.25232e-06	4.99231e-06	3.67856	NM_007292
NR1I2	-1.07383	0.0931215	CTPS1	1503	-1.07383	7.6691	2.71901	0.00659689	0.0102088	-3.79624	NM_001905
NR1I2	-1.07435	0.101193	AIFM1	9131	-1.07435	8.30995	3.25555	0.00114811	0.00195527	-2.204	NM_145812
NR1I2	-1.07507	0.152553	AKR1A1	10327	-1.07507	10.1814	3.92208	9.0352e-05	0.000173423	0.168171	NM_153326
NR1I2	-1.07983	0.0950936	KIAA0141	9812	-1.07983	6.7176	6.07506	1.4457e-09	4.06057e-09	10.7802
NR1I2	-1.08001	0.0580387	SLC25A38	54977	-1.08001	7.58946	4.35529	1.38704e-05	2.87284e-05	1.94298	NM_017875
NR1I2	-1.09045	0.075966	DDAH1	23576	-1.09045	8.80126	4.30234	1.76052e-05	3.61853e-05	1.71624	NM_012137
NR1I2	-1.09813	0.0916102	PDIA5	10954	-1.09813	9.18339	4.21532	2.59039e-05	5.24318e-05	1.34952	NM_006810
NR1I2	-1.10327	0.118296	PYGL	5836	-1.10327	9.43647	3.72027	0.000203766	0.000377056	-0.596045	NM_002863
NR1I2	-1.10468	0.171171	PCCB	5096	-1.10468	8.97543	4.21591	2.5837e-05	5.23138e-05	1.35197	NM_001178014
NR1I2	-1.11283	0.13123	PDE3B	5140	-1.11283	6.32978	5.25525	1.61408e-07	3.93916e-07	6.21254	NM_000922
NR1I2	-1.13406	0.115812	PCSK6	5046	-1.13406	5.85803	7.58384	4.83246e-14	1.81762e-13	20.8497	NM_138325
NR1I2	-1.14075	0.0633933	MAP7	9053	-1.14075	6.59709	6.50592	9.43963e-11	2.87562e-10	13.4374	NM_003980
NR1I2	-1.14625	0.193897	SLC35D1	23169	-1.14625	7.29783	6.35448	2.51213e-10	7.42833e-10	12.4834	NM_015139
NR1I2	-1.14845	0.0903234	ADIPOR2	79602	-1.14845	9.18625	6.11195	1.15224e-09	3.26206e-09	11.0008	NM_024551
NR1I2	-1.14858	0.0831227	ACAD8	27034	-1.14858	7.24587	7.40309	1.85475e-13	6.71328e-13	19.5312	NM_014384
NR1I2	-1.15394	0.16475	LPAL2	80350	-1.15394	4.70885	9.17588	9.65496e-20	5.02041e-19	33.757
NR1I2	-1.16881	0.116685	MCCC1	56922	-1.16881	8.51118	8.30315	1.70511e-16	7.33968e-16	26.3955	NM_020166
NR1I2	-1.17299	0.10477	TMEM53	79639	-1.17299	6.60965	8.72782	4.88286e-18	2.29893e-17	29.8917	NM_024587
NR1I2	-1.17435	0.157801	DERA	51071	-1.17435	9.89347	7.74713	1.39748e-14	5.42492e-14	22.0669	NM_015954
NR1I2	-1.17477	0.155241	COPZ2	51226	-1.17477	6.23461	7.98918	2.12434e-15	8.63439e-15	23.9165	NM_016429
NR1I2	-1.17571	0.142241	DECR1	1666	-1.17571	11.6064	7.53514	6.96352e-14	2.59177e-13	20.4915	NM_001359
NR1I2	-1.18347	0.13314	ARHGEF26	26084	-1.18347	5.76011	6.47638	1.14447e-10	3.4629e-10	13.2496	NM_015595
NR1I2	-1.18533	0.0487671	KCNK5	8645	-1.18533	5.34921	6.62457	4.32003e-11	1.34653e-10	14.2	NM_003740
NR1I2	-1.18651	0.0973059	BCKDK	10295	-1.18651	7.91736	9.1713	1.00593e-19	5.2284e-19	33.7166	NM_005881
NR1I2	-1.2062	0.193143	SLC28A1	9154	-1.2062	5.53336	7.0804	1.90039e-12	6.44471e-12	17.2527	NM_201651
NR1I2	-1.21989	0.16806	NIT2	56954	-1.21989	9.66892	10.4752	4.07354e-25	2.88751e-24	45.9736	NM_020202
NR1I2	-1.22206	0.112764	PCCA	5095	-1.22206	6.99695	10.8984	5.27809e-27	4.16873e-26	50.2703	NM_001352612
NR1I2	-1.22701	0.170929	PQLC1	80148	-1.22701	8.48015	11.121	5.04769e-28	4.25921e-27	52.592	NM_025078
NR1I2	-1.22876	0.129303	COQ9	57017	-1.22876	8.24328	9.7647	4.24921e-22	2.55798e-21	39.1092	NM_020312
NR1I2	-1.23331	0.206431	GSTA3	2940	-1.23331	6.84176	7.4572	1.24388e-13	4.55399e-13	19.9227	NM_001363542
NR1I2	-1.23491	0.102563	AGMAT	79814	-1.23491	7.71076	9.97123	5.89567e-23	3.71938e-22	41.059	NM_024758
NR1I2	-1.23737	0.209116	MOGAT2	80168	-1.23737	4.78783	9.25568	4.71152e-20	2.49494e-19	34.4643	NM_025098
NR1I2	-1.248	0.188792	LPIN2	9663	-1.248	8.80549	8.95161	7.03582e-19	3.48479e-18	31.7997	NM_014646
NR1I2	-1.24924	0.119183	TGDS	23483	-1.24924	7.08544	8.68864	6.82331e-18	3.17913e-17	29.5623	NM_014305
NR1I2	-1.25537	0.162714	PHYH	5264	-1.25537	11.0083	7.95679	2.74196e-15	1.10592e-14	23.6658	NM_006214
NR1I2	-1.26887	0.183273	ASB13	79754	-1.26887	7.67567	9.46169	7.2027e-21	3.98685e-20	36.3165	NM_024701
NR1I2	-1.27074	0.144335	CCDC25	55246	-1.27074	7.37837	12.2866	1.17765e-33	1.42354e-32	65.4303	NM_018246
NR1I2	-1.27076	0.166749	SLC25A20	788	-1.27076	8.38668	9.31829	2.67294e-20	1.43363e-19	35.0232	NM_000387
NR1I2	-1.27278	0.0959683	SDHA	6389	-1.27278	9.02063	11.5734	3.76031e-30	3.61396e-29	57.4404	NM_004168
NR1I2	-1.27301	0.22198	HDAC6	10013	-1.27301	6.358	14.5874	3.60415e-46	1.00484e-44	94.0033	NM_006044
NR1I2	-1.27757	0.137799	NAT1	9	-1.27757	6.73599	8.92721	8.70936e-19	4.28736e-18	31.5895	NM_001291962
NR1I2	-1.2783	0.158738	ZG16	653808	-1.2783	6.34999	5.64684	1.83519e-08	4.77741e-08	8.31418	NM_152338
NR1I2	-1.27913	0.0986817	HEBP1	50865	-1.27913	9.98986	11.8949	1.0425e-31	1.09026e-30	60.99	NM_015987
NR1I2	-1.28539	0.284847	SUOX	6821	-1.28539	7.76546	11.9048	9.32729e-32	9.80541e-31	61.1002	NM_001032387
NR1I2	-1.28702	0.178895	CCS	9973	-1.28702	7.77679	13.9991	8.47148e-43	1.87395e-41	86.3015	NM_005125
NR1I2	-1.2875	0.166506	TTPAL	79183	-1.2875	6.76109	9.40381	1.22555e-20	6.66777e-20	35.7922	NM_024331
NR1I2	-1.29288	0.205226	FAHD2A	51011	-1.29288	6.67362	15.6655	1.22018e-52	5.70047e-51	108.793	NM_016044
NR1I2	-1.29399	0.202445	SARDH	1757	-1.29399	5.28365	15.4291	3.44697e-51	1.43328e-49	105.476	NM_007101
NR1I2	-1.29704	0.206215	SUCLG2	8801	-1.29704	9.27234	12.0889	1.15015e-32	1.29339e-31	63.173	NM_003848
NR1I2	-1.29809	0.135513	ABCG5	64240	-1.29809	8.86023	6.35822	2.45266e-10	7.25426e-10	12.5067	NM_022436
NR1I2	-1.30199	0.23279	ACADM	34	-1.30199	10.7561	9.537	3.59131e-21	2.02965e-20	37.003	NM_001286044
NR1I2	-1.3027	0.147778	ASL	435	-1.3027	9.23778	9.02533	3.68062e-19	1.85719e-18	32.4381	NM_001024946
NR1I2	-1.30325	0.0615908	ELOVL6	79071	-1.30325	7.46224	8.85421	1.64395e-18	7.98225e-18	30.9637	NM_024090
NR1I2	-1.30544	0.0814349	AUTS2	26053	-1.30544	7.5688	9.15112	1.20492e-19	6.21727e-19	33.5386	NM_015570
NR1I2	-1.30566	0.158689	ABHD2	11057	-1.30566	7.30913	10.6755	5.30944e-26	3.95837e-25	47.9877	NM_152924
NR1I2	-1.3073	0.259772	ESR1	2099	-1.3073	4.70021	19.3289	2.86614e-77	1.23858e-74	165.143	NM_001328100
NR1I2	-1.31249	0.298691	PXMP2	5827	-1.31249	9.16257	8.39803	7.81805e-17	3.425e-16	27.1624	NM_018663
NR1I2	-1.31485	0.262095	BDH1	622	-1.31485	7.65967	8.26354	2.35544e-16	1.00532e-15	26.0779	NM_203315
NR1I2	-1.327	0.210154	GSTA1	2938	-1.327	9.51057	6.95887	4.45297e-12	1.47903e-11	16.4198	NM_145740
NR1I2	-1.32996	0.196905	PRKAG2	51422	-1.32996	5.54157	14.7641	3.32712e-47	1.00645e-45	96.3679	NM_024429
NR1I2	-1.3309	0.0775582	G0S2	50486	-1.3309	8.31813	6.60093	5.05336e-11	1.56985e-10	14.047	NM_015714
NR1I2	-1.33555	0.239216	MASP1	5648	-1.33555	6.30632	12.1232	7.76341e-33	8.87037e-32	63.5623	NM_139125
NR1I2	-1.34134	0.0872737	CISH	1154	-1.34134	5.93882	9.62087	1.64486e-21	9.55027e-21	37.7734	NM_145071
NR1I2	-1.34632	0.187987	PIK3C2G	5288	-1.34632	6.06525	8.8028	2.56424e-18	1.22929e-17	30.5259	NM_004570
NR1I2	-1.35012	0.293121	SHMT1	6470	-1.35012	6.93321	11.9918	3.48154e-32	3.77479e-31	62.0761	NM_148918
NR1I2	-1.35169	0.227072	MUT	4594	-1.35169	9.68894	12.2205	2.53046e-33	2.99009e-32	64.6727
NR1I2	-1.3588	0.140962	ART4	420	-1.3588	6.66404	9.03843	3.27868e-19	1.65853e-18	32.5521	NM_021071
NR1I2	-1.36571	0.344029	HAGH	3029	-1.36571	9.42174	11.0028	1.76386e-27	1.445e-26	51.3543	NM_005326
NR1I2	-1.36668	0.152554	BDH2	56898	-1.36668	7.34085	10.5833	1.36124e-25	9.92227e-25	47.057	NM_020139
NR1I2	-1.36945	0.168273	PSD3	23362	-1.36945	7.14501	10.4644	4.54052e-25	3.21476e-24	45.8664	NM_206909
NR1I2	-1.36954	0.0830696	NR0B2	8431	-1.36954	7.71798	7.88822	4.69112e-15	1.86842e-14	23.1384	NM_021969
NR1I2	-1.38291	0.183137	DIO1	1733	-1.38291	9.67217	5.75639	9.73702e-09	2.58486e-08	8.92837	NM_213593
NR1I2	-1.38393	0.170772	SULT1A1	6817	-1.38393	8.49889	13.1341	4.70607e-38	7.42419e-37	75.4669	NM_177536
NR1I2	-1.38586	0.257862	PGM1	5236	-1.38586	10.7816	10.8627	7.6622e-27	6.01639e-26	49.9017	NM_002633
NR1I2	-1.38734	0.184361	HYAL1	3373	-1.38734	8.97252	10.6855	4.78698e-26	3.58209e-25	48.0901	NM_153285
NR1I2	-1.39215	0.136475	SMIM14	201895	-1.39215	8.26278	14.4132	3.68934e-45	9.49809e-44	91.6952	NM_174921
NR1I2	-1.39717	0.319339	IVD	3712	-1.39717	6.95308	16.05	4.8909e-55	2.81809e-53	114.274	NM_002225
NR1I2	-1.40354	0.293036	ACAA2	10449	-1.40354	8.62964	12.7704	3.89758e-36	5.4521e-35	71.089	NM_006111
NR1I2	-1.40507	0.131988	SLC39A14	23516	-1.40507	9.56525	12.935	5.35088e-37	7.88619e-36	73.0571	NM_015359
NR1I2	-1.41143	0.222627	HMGCS2	3158	-1.41143	11.9894	7.43892	1.42407e-13	5.19169e-13	19.7901	NM_005518
NR1I2	-1.4186	0.14182	UGT2B28	54490	-1.4186	10.2169	8.65055	9.43374e-18	4.35348e-17	29.2434	NM_053039
NR1I2	-1.42473	0.27731	BCKDHB	594	-1.42473	6.94385	13.2168	1.69733e-38	2.77162e-37	76.478	NM_183050
NR1I2	-1.4253	0.18618	TSKU	25987	-1.4253	9.33349	8.37444	9.49758e-17	4.14427e-16	26.971	NM_015516
NR1I2	-1.44184	0.189097	UGP2	7360	-1.44184	9.89125	12.6189	2.37824e-35	3.20097e-34	69.2967	NM_006759
NR1I2	-1.44235	0.225798	QDPR	5860	-1.44235	9.11916	14.488	1.36246e-45	3.65538e-44	92.6837	NM_001306140
NR1I2	-1.44441	0.286402	SLCO2B1	11309	-1.44441	8.31783	10.6258	8.83145e-26	6.50003e-25	47.4847	NM_007256
NR1I2	-1.44615	0.152326	GCH1	2643	-1.44615	8.74161	10.6977	4.22528e-26	3.17749e-25	48.2135	NM_001024071
NR1I2	-1.4471	0.395381	PCK2	5106	-1.4471	9.89986	10.6895	4.59488e-26	3.44474e-25	48.1306	NM_004563
NR1I2	-1.45288	0.249417	TMEM131L	23240	-1.45288	7.45208	14.6593	1.37206e-46	3.9248e-45	94.9618	NM_015196
NR1I2	-1.45791	0.301244	FETUB	26998	-1.45791	6.39693	10.9942	1.93202e-27	1.56896e-26	51.2643	NM_014375
NR1I2	-1.46497	0.257546	FAH	2184	-1.46497	9.01502	14.6757	1.09918e-46	3.16668e-45	95.1819	NM_000137
NR1I2	-1.46964	0.234166	ACOX2	8309	-1.46964	10.0062	9.68431	9.07467e-22	5.35366e-21	38.3603	NM_003500
NR1I2	-1.47478	0.218869	AGL	178	-1.47478	8.77649	15.5666	4.95934e-52	2.16635e-50	107.401	NM_000646
NR1I2	-1.47682	0.194048	GOT2	2806	-1.47682	10.7657	14.0147	6.91173e-43	1.53453e-41	86.5033	NM_002080
NR1I2	-1.48835	0.207628	SULT1A2	6799	-1.48835	8.08209	13.7687	1.64509e-41	3.28476e-40	83.3591	NM_177528
NR1I2	-1.49463	0.172455	PROS1	5627	-1.49463	11.2037	13.7246	2.88888e-41	5.67458e-40	82.8006	NM_001314077
NR1I2	-1.49663	0.0532219	PHGDH	26227	-1.49663	9.00427	12.8112	2.38692e-36	3.38589e-35	71.575	NM_006623
NR1I2	-1.49829	0.278785	GADD45A	1647	-1.49829	9.57184	12.892	9.01346e-37	1.31085e-35	72.5402	NM_001924
NR1I2	-1.51544	0.291769	MPDZ	8777	-1.51544	8.70725	12.3558	5.26092e-34	6.50891e-33	66.2286	NM_003829
NR1I2	-1.52043	0.170815	LIPG	9388	-1.52043	7.60228	11.0708	8.59474e-28	7.15735e-27	52.0655	NM_006033
NR1I2	-1.53027	0.18004	ENPEP	2028	-1.53027	7.57734	12.2324	2.20543e-33	2.61881e-32	64.8088	NM_001977
NR1I2	-1.53477	0.297455	CYP4F3	4051	-1.53477	9.20474	11.4581	1.3331e-29	1.24081e-28	56.1877	NM_001199209
NR1I2	-1.53536	0.342053	DAO	1610	-1.53536	7.63913	9.88962	1.29247e-22	8.01173e-22	40.2841	NM_001917
NR1I2	-1.54216	0.165055	RAB26	25837	-1.54216	6.2724	13.3874	2.0384e-39	3.52857e-38	78.5795	NM_014353
NR1I2	-1.54234	0.242544	HGD	3081	-1.54234	9.74757	12.4046	2.97487e-34	3.7379e-33	66.7934	NM_000187
NR1I2	-1.54852	0.242406	MSRA	4482	-1.54852	7.38685	15.6009	3.05463e-52	1.38951e-50	107.882	NM_012331
NR1I2	-1.55019	0.200345	SLC22A7	10864	-1.55019	7.8965	9.4252	1.00728e-20	5.50004e-20	35.9857	NM_153320
NR1I2	-1.56013	0.178547	ANO1	55107	-1.56013	6.98393	10.6037	1.10632e-25	8.08848e-25	47.262	NM_018043
NR1I2	-1.56413	0.327895	SEC14L2	23541	-1.56413	6.92379	12.4275	2.27636e-34	2.87815e-33	67.0586	NM_033382
NR1I2	-1.56771	0.273801	HMGCL	3155	-1.56771	9.52351	16.4796	9.05448e-58	6.29651e-56	120.523	NM_001166059
NR1I2	-1.57458	0.173991	SLC17A3	10786	-1.57458	6.97594	9.97929	5.45402e-23	3.45155e-22	41.1359	NM_006632
NR1I2	-1.57566	0.220746	TTR	7276	-1.57566	13.2891	8.96177	6.43707e-19	3.1974e-18	31.8874	NM_000371
NR1I2	-1.58781	0.229843	SLC25A15	10166	-1.58781	8.87875	11.4276	1.85895e-29	1.71836e-28	55.8587	NM_014252
NR1I2	-1.58898	0.238108	CYP2B7P	1556	-1.58898	7.8223	7.456	1.25498e-13	4.59323e-13	19.914
NR1I2	-1.59001	0.289529	XDH	7498	-1.59001	7.41193	11.3764	3.24316e-29	2.96168e-28	55.3079	NM_000379
NR1I2	-1.59439	0.259342	ALDOB	229	-1.59439	10.4347	10.3923	9.37649e-25	6.53923e-24	45.1497	NM_000035
NR1I2	-1.5945	0.248716	SLC27A2	11001	-1.5945	10.25	9.45328	7.78222e-21	4.29584e-20	36.2401	NM_003645
NR1I2	-1.597	0.288361	ACAA1	30	-1.597	10.2162	15.4018	5.05062e-51	2.06461e-49	105.096	NM_001607
NR1I2	-1.59992	0.167381	RAB17	64284	-1.59992	8.94254	15.2897	2.42124e-50	9.27033e-49	103.54	NM_022449
NR1I2	-1.61386	0.106844	PLA2G16	11145	-1.61386	7.55711	17.6987	7.93909e-66	1.09163e-63	138.955	NM_007069
NR1I2	-1.61401	0.227294	GSTA2	2939	-1.61401	11.6398	8.19859	3.98902e-16	1.68354e-15	25.5599	NM_000846
NR1I2	-1.61502	0.239136	UPB1	51733	-1.61502	9.36989	10.101	1.67148e-23	1.0827e-22	42.3039	NM_016327
NR1I2	-1.61522	0.0634468	SULT1E1	6783	-1.61522	5.93687	11.0687	8.7915e-28	7.31115e-27	52.0431	NM_005420
NR1I2	-1.62769	0.335327	ALDH2	217	-1.62769	12.1721	15.9389	2.43554e-54	1.31563e-52	112.68	NM_001204889
NR1I2	-1.63353	0.279027	SRD5A1	6715	-1.63353	7.77863	14.5777	4.10796e-46	1.14267e-44	93.8735	NM_001324323
NR1I2	-1.63987	0.344223	DHRS1	115817	-1.63987	9.95042	13.9013	2.99978e-42	6.37914e-41	85.0472	NM_138452
NR1I2	-1.64288	0.166245	NDRG2	57447	-1.64288	7.52958	17.4923	1.97002e-64	2.40781e-62	135.764	NM_201541
NR1I2	-1.6503	0.296325	GPD1	2819	-1.6503	5.9026	16.6943	3.71978e-59	2.83078e-57	123.694	NM_005276
NR1I2	-1.65222	0.205747	ACADS	35	-1.65222	7.44852	18.7737	2.73823e-73	8.41513e-71	156.032	NM_001302554
NR1I2	-1.67319	0.204342	GPT	2875	-1.67319	7.01275	17.2377	9.97102e-63	1.01386e-60	131.865	NM_005309
NR1I2	-1.69258	0.204529	CYP4F12	66002	-1.69258	7.91183	14.9789	1.78062e-48	6.06916e-47	99.2738	NM_023944
NR1I2	-1.69457	0.218923	ACSL1	2180	-1.69457	11.0936	11.8438	1.85522e-31	1.91537e-30	60.4193	NM_001995
NR1I2	-1.69985	0.275902	OTC	5009	-1.69985	9.74369	9.09183	2.04312e-19	1.04179e-18	33.0182	NM_000531
NR1I2	-1.70312	0.242869	TKFC	26007	-1.70312	7.2838	14.4279	3.03528e-45	7.88131e-44	91.8889	NM_015533
NR1I2	-1.71369	0.24427	PBLD	64081	-1.71369	8.96527	14.2164	4.96552e-44	1.16666e-42	89.1158	NM_022129
NR1I2	-1.71416	0.316463	ECHDC2	55268	-1.71416	10.8689	17.8331	9.65213e-67	1.44186e-64	141.049	NM_018281
NR1I2	-1.71822	0.134375	CYP2C18	1562	-1.71822	8.94109	10.8827	6.21411e-27	4.90161e-26	50.1089	NM_001128925
NR1I2	-1.7294	0.298622	HAAO	23498	-1.7294	7.05191	15.9808	1.33149e-54	7.42443e-53	113.279	NM_012205
NR1I2	-1.73561	0.282016	ETFDH	2110	-1.73561	8.60531	15.5209	9.46208e-52	4.05997e-50	106.759	NM_004453
NR1I2	-1.73693	0.226345	ACACB	32	-1.73693	7.8906	17.3359	2.20742e-63	2.47312e-61	133.363	NM_001093
NR1I2	-1.74897	0.199356	FAM149A	25854	-1.74897	6.75182	17.2073	1.58791e-62	1.58791e-60	131.402	NM_015398
NR1I2	-1.78917	0.274576	CIDEB	27141	-1.78917	9.70596	13.2788	7.88454e-39	1.31048e-37	77.2382	NM_014430
NR1I2	-1.80909	0.264874	GCKR	2646	-1.80909	7.35758	17.3586	1.55509e-63	1.77515e-61	133.711	NM_001486
NR1I2	-1.81045	0.399387	ACADL	33	-1.81045	6.44656	15.1945	9.09925e-50	3.35674e-48	102.226	NM_001608
NR1I2	-1.81055	0.237536	PLG	5340	-1.81055	11.6009	11.0834	7.52581e-28	6.29318e-27	52.1969	NM_001168338
NR1I2	-1.82206	0.221986	HPX	3263	-1.82206	12.7405	11.3872	2.88484e-29	2.64244e-28	55.4238	NM_000613
NR1I2	-1.83085	0.341836	ETNPPL	64850	-1.83085	9.05566	10.458	4.84316e-25	3.42503e-24	45.8026	NM_031279
NR1I2	-1.85832	0.255272	F11	2160	-1.85832	7.34401	16.7833	9.80543e-60	7.80564e-58	125.018	NM_001354804
NR1I2	-1.85847	0.33575	EPHX2	2053	-1.85847	8.80763	13.9766	1.13344e-42	2.48453e-41	86.0127	NM_001979
NR1I2	-1.90264	0.13956	TDO2	6999	-1.90264	9.82523	11.8993	9.9219e-32	1.04034e-30	61.039	NM_005651
NR1I2	-1.91226	0.119365	ENO3	2027	-1.91226	6.74987	15.1281	2.28401e-49	8.22516e-48	101.312	NM_053013
NR1I2	-1.91401	0.333507	HAO1	54363	-1.91401	10.0159	12.7651	4.15676e-36	5.80794e-35	71.0252	NM_017545
NR1I2	-1.91928	0.297715	LPA	4018	-1.91928	8.6006	14.3251	1.18508e-44	2.91453e-43	90.5373	NM_005577
NR1I2	-1.93565	0.298128	AKR7A3	22977	-1.93565	8.95352	14.6287	2.07124e-46	5.86932e-45	94.5531	NM_012067
NR1I2	-1.93818	0.279975	PON1	5444	-1.93818	9.51321	13.196	2.19594e-38	3.557e-37	76.2226	NM_000446
NR1I2	-1.96535	0.248889	SERPINA4	5267	-1.96535	8.87226	14.7686	3.13255e-47	9.52357e-46	96.4277	NM_006215
NR1I2	-1.98458	0.196947	GCGR	2642	-1.98458	6.92293	16.3832	3.75659e-57	2.51131e-55	119.11	NM_000160
NR1I2	-1.99695	0.358238	ACSM5	54988	-1.99695	7.79987	14.822	1.51698e-47	4.73078e-46	97.1474	NM_017888
NR1I2	-1.99833	0.309559	CYP4A22	284541	-1.99833	7.67521	13.8757	4.17077e-42	8.77676e-41	84.7203	NM_001308102
NR1I2	-2.03986	0.270439	ACSM3	6296	-2.03986	6.8633	16.7348	2.02669e-59	1.56197e-57	124.297	NM_202000
NR1I2	-2.04035	0.276456	GSTZ1	2954	-2.04035	7.40052	17.4977	1.81428e-64	2.26318e-62	135.846	NM_145871
NR1I2	-2.09025	0.202778	FTCD	10841	-2.09025	8.95073	15.9575	1.86389e-54	1.0205e-52	112.945	NM_206965
NR1I2	-2.10953	0.204794	ABCA8	10351	-2.10953	7.13791	16.3522	5.9295e-57	3.89929e-55	118.656	NM_007168
NR1I2	-2.12211	0.29958	CYP2C8	1558	-2.12211	9.39758	13.94	1.81955e-42	3.93152e-41	85.5431	NM_001198855
NR1I2	-2.17304	0.244015	PROZ	8858	-2.17304	6.79456	16.1876	6.61183e-56	4.06107e-54	116.261	NM_003891
NR1I2	-2.18743	0.285417	OGDHL	55753	-2.18743	8.03429	16.3015	1.24929e-56	7.99811e-55	117.916	NM_018245
NR1I2	-2.19429	0.388001	SLC27A5	10998	-2.19429	8.95913	15.6946	8.06528e-53	3.84212e-51	109.204	NM_012254
NR1I2	-2.19569	0.300495	CYP4A11	1579	-2.19569	10.0584	13.8686	4.56918e-42	9.59846e-41	84.6298	NM_001319155
NR1I2	-2.28519	0.278928	FBP1	2203	-2.28519	10.468	15.4686	1.97708e-51	8.33543e-50	106.027	NM_001127628
NR1I2	-2.31306	0.25133	GLS2	27165	-2.31306	7.0586	14.5188	9.02816e-46	2.46593e-44	93.0921	NM_013267
NR1I2	-2.34323	0.278384	KLKB1	3818	-2.34323	9.75447	17.9818	9.2549e-68	1.57724e-65	143.379	NM_001318396
NR1I2	-2.36321	0.220131	ALDH8A1	64577	-2.36321	9.7457	17.0643	1.40605e-61	1.31885e-59	129.235	NM_170771
NR1I2	-2.3971	0.28128	ANXA10	11199	-2.3971	8.07242	16.3292	8.32111e-57	5.4132e-55	118.32	NM_007193
NR1I2	-2.39851	0.322024	C8A	731	-2.39851	10.9524	16.0214	7.3967e-55	4.2217e-53	113.863	NM_000562
NR1I2	-2.42007	0.18234	FXYD1	5348	-2.42007	7.7891	15.8998	4.2787e-54	2.24122e-52	112.12	NM_021902
NR1I2	-2.4221	0.309966	TAT	6898	-2.4221	8.48607	14.5036	1.10722e-45	2.99717e-44	92.8896	NM_000353
NR1I2	-2.4349	0.371548	SLC10A1	6554	-2.4349	10.373	12.291	1.1189e-33	1.35658e-32	65.481	NM_003049
NR1I2	-2.47534	0.428943	GYS2	2998	-2.47534	8.08895	14.222	4.61546e-44	1.08652e-42	89.1883	NM_021957
NR1I2	-2.47692	0.280402	GHR	2690	-2.47692	9.89118	16.5197	4.99964e-58	3.49686e-56	121.113	NM_001242462
NR1I2	-2.60797	0.224232	AKR1D1	6718	-2.60797	10.1473	14.5314	7.63208e-46	2.1036e-44	93.2588	NM_005989
NR1I2	-2.61864	0.242663	AFM	173	-2.61864	10.5468	14.9577	2.37977e-48	7.97653e-47	98.9859	NM_001133
NR1I2	-2.6814	0.357059	RDH16	8608	-2.6814	9.76651	15.9078	3.8132e-54	2.01483e-52	112.234	NM_003708
NR1I2	-2.69164	0.213001	SDS	10993	-2.69164	8.76027	13.3027	5.86111e-39	9.80905e-38	77.5322	NM_006843
NR1I2	-2.69189	0.4814	GLYAT	10249	-2.69189	7.85057	16.0154	8.07484e-55	4.56568e-53	113.776	NM_201648
NR1I2	-2.72678	0.406193	HAO2	51179	-2.72678	7.86115	15.0646	5.48737e-49	1.90796e-47	100.442	NM_016527
NR1I2	-2.77886	0.226852	BBOX1	8424	-2.77886	7.31408	16.5253	4.6037e-58	3.25759e-56	121.195	NM_003986
NR1I2	-2.8475	0.268481	SRD5A2	6716	-2.8475	6.66503	20.0682	1.07107e-82	1.08e-79	177.567	NM_000348
NR1I2	-2.87386	0.427527	GBA3	57733	-2.87386	8.42909	16.6631	5.92166e-59	4.39583e-57	123.232	NM_020973
NR1I2	-3.52543	0.368059	SLC22A1	6580	-3.52543	9.58167	15.7612	3.12051e-53	1.51639e-51	110.147	NM_153187
NR1I2	-3.66793	0.315812	NAT2	10	-3.66793	7.38771	20.0357	1.8704e-82	1.61656e-79	177.013	NM_000015
NR1I3	1.61181	-0.149772	STK39	27347	1.61181	6.13465	-11.8491	1.74632e-31	1.80602e-30	60.4792	NM_013233
NR1I3	1.44253	-0.23199	PKM	5315	1.44253	5.87017	-12.6414	1.82126e-35	2.47332e-34	69.5611	NM_182471
NR1I3	1.41716	-0.128244	GARS	2617	1.41716	9.23856	-15.4916	1.42935e-51	6.06846e-50	106.35	NM_002047
NR1I3	1.40815	-0.182654	SLC38A1	81539	1.40815	6.34386	-9.72922	5.94351e-22	3.55318e-21	38.778	NM_030674
NR1I3	1.39323	-0.158158	G6PD	2539	1.39323	5.54803	-9.96423	6.30757e-23	3.97508e-22	40.9924	NM_001360016
NR1I3	1.3587	-0.150033	SLC52A2	79581	1.3587	5.55274	-12.9653	3.70556e-37	5.51505e-36	73.4213	NM_024531
NR1I3	1.34966	-0.12113	ARHGEF3	50650	1.34966	6.97416	-9.98374	5.22436e-23	3.30794e-22	41.1784	NM_019555
NR1I3	1.32162	-0.117482	PYGB	5834	1.32162	5.5661	-13.0138	2.05102e-37	3.12167e-36	74.0076	NM_002862
NR1I3	1.31349	-0.138634	GPD1L	23171	1.31349	6.02434	-9.4457	8.34437e-21	4.59595e-20	36.1713	NM_015141
NR1I3	1.30136	-0.24082	SOX4	6659	1.30136	5.96247	-8.52302	2.76438e-17	1.23977e-16	28.1852	NM_003107
NR1I3	1.24452	-0.145612	CLSTN1	22883	1.24452	6.93375	-9.52888	3.87233e-21	2.18337e-20	36.9287	NM_014944
NR1I3	1.22658	-0.101784	PHLDA2	7262	1.22658	4.99155	-10.1108	1.5196e-23	9.85908e-23	42.3979	NM_003311
NR1I3	1.21175	-0.0616685	SNCAIP	9627	1.21175	4.55581	-7.24838	5.72752e-13	2.00587e-12	18.4266	NM_005460
NR1I3	1.20267	-0.146016	MARS	4141	1.20267	7.25544	-11.5028	8.17018e-30	7.68734e-29	56.6723	NM_004990
NR1I3	1.17681	-0.0939926	EGLN3	112399	1.17681	4.67137	-6.50574	9.45072e-11	2.87827e-10	13.4363	NM_022073
NR1I3	1.17489	-0.0491141	LYPD1	116372	1.17489	4.42335	-7.1793	9.40877e-13	3.25089e-12	17.9407	NM_144586
NR1I3	1.1744	-0.134603	SLC16A3	9123	1.1744	5.18201	-7.28377	4.43377e-13	1.56684e-12	18.6774	NM_004207
NR1I3	1.17414	-0.203268	SLC7A1	6541	1.17414	4.63391	-10.4579	4.85123e-25	3.42873e-24	45.8009	NM_003045
NR1I3	1.16232	-0.043704	NTS	4922	1.16232	4.78053	-2.96633	0.0030447	0.00492065	-3.09753	NM_006183
NR1I3	1.15572	-0.124978	HK2	3099	1.15572	4.60514	-7.24968	5.67374e-13	1.98762e-12	18.4359	NM_000189
NR1I3	1.14975	-0.117929	CDK2AP1	8099	1.14975	10.0086	-8.492	3.58287e-17	1.60091e-16	27.9301	NM_004642
NR1I3	1.14957	-0.184513	SLC1A5	6510	1.14957	5.59677	-6.86832	8.32464e-12	2.71724e-11	15.8082	NM_005628
NR1I3	1.14328	-0.131156	NFE2L3	9603	1.14328	4.65273	-6.39699	1.91265e-10	5.69886e-10	12.7491	NM_004289
NR1I3	1.14206	-0.0618544	CDS1	1040	1.14206	4.49366	-5.96608	2.80524e-09	7.74786e-09	10.1361	NM_001263
NR1I3	1.13226	-0.124983	CLIP2	7461	1.13226	4.74817	-6.04701	1.71646e-09	4.80656e-09	10.6134	NM_032421
NR1I3	1.12453	-0.14399	TYRO3	7301	1.12453	4.40949	-8.0714	1.10683e-15	4.55997e-15	24.557	NM_006293
NR1I3	1.1206	-0.0607498	PKIA	5569	1.1206	4.06258	-5.72726	1.15366e-08	3.04655e-08	8.76396	NM_181839
NR1I3	1.10451	-0.105067	CD63	967	1.10451	11.4152	-6.49291	1.02764e-10	3.1258e-10	13.3546	NM_001780
NR1I3	1.10227	-0.0928353	CA9	768	1.10227	4.52549	-3.71763	0.000205894	0.000380819	-0.60578	NM_001216
NR1I3	1.09968	-0.0367666	GULP1	51454	1.09968	4.30743	-3.85991	0.000116547	0.000221107	-0.0715099	NM_016315
NR1I3	1.08822	-0.122978	SMARCD3	6604	1.08822	4.28649	-5.3686	8.72941e-08	2.16936e-07	6.80577	NM_003078
NR1I3	1.06519	0.132405	HNF4A	3172	1.06519	5.49932	-4.73593	2.31296e-06	5.11829e-06	3.65311	NM_178850
NR1I3	1.05882	-0.186631	TMEM51	55092	1.05882	5.823	-2.68151	0.00738139	0.011343	-3.8969	NM_018022
NR1I3	1.05843	-0.144353	RAP1GAP	5909	1.05843	6.20163	-2.54723	0.0109227	0.0163997	-4.24597	NM_002885
NR1I3	1.05095	-0.130928	FAM57A	79850	1.05095	4.63624	-2.79863	0.00517468	0.00810952	-3.57789	NM_024792
NR1I3	1.04734	-0.149337	ITPR3	3710	1.04734	5.0141	-2.36508	0.0181087	0.0262193	-4.69098	NM_002224
NR1I3	1.04369	-0.114712	SLC4A7	9497	1.04369	5.1243	-3.66073	0.000257152	0.000471446	-0.813893	NM_003615
NR1I3	1.02036	-0.0538493	NEBL	10529	1.02036	4.33531	-1.42908	0.153117	0.190139	-6.45889	NM_213569
NR1I3	1.00828	0.155214	EPHX1	2052	1.00828	12.1992	-0.177281	0.859303	0.880628	-7.46114	NM_001291163
NR1I3	1.00392	-0.0498458	PAQR5	54852	1.00392	4.47149	-0.234187	0.814861	0.841138	-7.44946	NM_017705
NR1I3	-0.999913	0.128659	SUGCT	79783	-0.999913	6.99302	-0.00372653	0.997027	0.997539	-7.4768	NM_024728
NR1I3	-1.00047	-0.0558508	BTC	685	-1.00047	4.18051	0.0570932	0.954476	0.961949	-7.47518	NM_001729
NR1I3	-1.00136	-0.136245	DDR1	780	-1.00136	6.0226	0.0558912	0.955433	0.962593	-7.47525	NM_013994
NR1I3	-1.02604	0.136129	F5	2153	-1.02604	10.852	0.777043	0.437213	0.489845	-7.17577	NM_000130
NR1I3	-1.03113	0.153289	KLF15	28999	-1.03113	6.0206	1.90079	0.057454	0.0772265	-5.67661	NM_014079
NR1I3	-1.04303	0.0844486	XYLB	9942	-1.04303	5.72752	2.54204	0.0110857	0.0166258	-4.2591	NM_005108
NR1I3	-1.04305	0.0693991	PKIG	11142	-1.04305	7.599	2.82081	0.00483117	0.00760369	-3.51594	NM_181805
NR1I3	-1.05303	0.0428772	STAG3	10734	-1.05303	5.10939	2.51463	0.0119833	0.0178701	-4.32802	NM_012447
NR1I3	-1.07663	0.0759088	COBL	23242	-1.07663	7.47996	2.81172	0.0049694	0.00780893	-3.54139	NM_015198
NR1I3	-1.08293	0.123863	MSMO1	6307	-1.08293	10.6208	3.23578	0.00123028	0.00208756	-2.2677	NM_006745
NR1I3	-1.08666	0.0941222	TMEM176A	55365	-1.08666	11.9583	3.30709	0.000957171	0.00164514	-2.03612	NM_018487
NR1I3	-1.08892	0.209759	BTD	686	-1.08892	6.87493	3.71969	0.000204229	0.000377842	-0.598171	NM_001323582
NR1I3	-1.08926	0.0847006	DIAPH1	1729	-1.08926	7.21741	7.01109	3.09379e-12	1.03583e-11	16.7759	NM_005219
NR1I3	-1.09203	0.054059	TCP10L	140290	-1.09203	4.99166	4.64771	3.54573e-06	7.70949e-06	3.24424	NM_144659
NR1I3	-1.09551	0.120167	F10	2159	-1.09551	9.05995	2.86895	0.00415585	0.00660439	-3.37985	NM_001312675
NR1I3	-1.10951	0.0911073	SLC2A9	56606	-1.10951	5.28053	5.05866	4.55513e-07	1.07273e-06	5.21305	NM_020041
NR1I3	-1.11254	0.104872	ITCH	83737	-1.11254	6.96737	6.28027	4.02667e-10	1.17802e-09	12.0239	NM_031483
NR1I3	-1.12004	0.138597	KLF12	11278	-1.12004	5.3992	8.90896	1.02129e-18	5.00919e-18	31.4326	NM_007249
NR1I3	-1.12725	0.154137	C4BPB	725	-1.12725	10.2789	3.34862	0.000825221	0.00143075	-1.89897	NM_001017367
NR1I3	-1.12865	0.125132	NIT1	4817	-1.12865	7.58194	7.35057	2.72635e-13	9.75999e-13	19.1537	NM_005600
NR1I3	-1.14655	0.196722	SERPINA6	866	-1.14655	10.1929	3.33473	0.000867328	0.0014986	-1.94501	NM_001756
NR1I3	-1.15692	0.253199	CYB5A	1528	-1.15692	10.7398	5.13223	3.10255e-07	7.40305e-07	5.58273	NM_148923
NR1I3	-1.15692	0.187408	F13B	2165	-1.15692	8.71216	2.98831	0.00283484	0.00460424	-3.03252	NM_001994
NR1I3	-1.15986	0.112168	PALMD	54873	-1.15986	6.96944	5.28338	1.38727e-07	3.39798e-07	6.35862	NM_017734
NR1I3	-1.1607	0.0320425	XPNPEP2	7512	-1.1607	6.13236	2.65595	0.00796311	0.0121874	-3.96472	NM_003399
NR1I3	-1.16394	0.210263	ALDH7A1	501	-1.16394	9.11487	6.69241	2.74701e-11	8.69217e-11	14.6419	NM_001202404
NR1I3	-1.17529	0.123111	CHAD	1101	-1.17529	5.68696	6.12091	1.09025e-09	3.09019e-09	11.0546	NM_001267
NR1I3	-1.17733	0.0554601	ERLIN2	11160	-1.17733	6.79004	10.611	1.02655e-25	7.5326e-25	47.3359	NM_007175
NR1I3	-1.17887	0.168995	SERPIND1	3053	-1.17887	11.89	3.90074	9.86418e-05	0.000188736	0.0854837	NM_000185
NR1I3	-1.184	0.141553	CLDN14	23562	-1.184	6.64773	6.55735	6.7376e-11	2.0776e-10	13.7663	NM_144492
NR1I3	-1.19314	0.160774	SLC38A3	10991	-1.19314	9.01739	4.09485	4.36994e-05	8.64133e-05	0.854054	NM_006841
NR1I3	-1.19917	0.135015	GAS2	2620	-1.19917	8.41555	6.40663	1.7976e-10	5.36797e-10	12.8095	NM_177553
NR1I3	-1.23457	0.177634	SLC6A1	6529	-1.23457	9.32427	4.82226	1.51195e-06	3.40237e-06	4.06055	NM_003042
NR1I3	-1.23758	0.110852	ICAM3	3385	-1.23758	8.45437	8.94583	7.40091e-19	3.66112e-18	31.7499	NM_002162
NR1I3	-1.23848	0.155152	ST3GAL1	6482	-1.23848	7.46328	7.40279	1.85881e-13	6.72595e-13	19.529	NM_173344
NR1I3	-1.25357	0.0632836	CCNB1IP1	57820	-1.25357	7.80295	8.80118	2.60032e-18	1.2456e-17	30.5122	NM_182852
NR1I3	-1.27137	0.219126	KNG1	3827	-1.27137	12.3829	5.21285	2.02501e-07	4.90738e-07	5.99383	NM_001166451
NR1I3	-1.27473	0.184897	PECR	55825	-1.27473	9.1824	7.76665	1.20288e-14	4.68452e-14	22.2141	NM_018441
NR1I3	-1.27987	0.113516	TF	7018	-1.27987	12.1118	7.57638	5.11124e-14	1.92128e-13	20.7947	NM_001354704
NR1I3	-1.29951	0.190503	HSD17B8	7923	-1.29951	8.27424	9.70325	7.59296e-22	4.50146e-21	38.5363	NM_014234
NR1I3	-1.31281	0.101527	GCAT	23464	-1.31281	7.42097	9.7728	3.93525e-22	2.37608e-21	39.1849	NM_014291
NR1I3	-1.31283	0.22292	POR	5447	-1.31283	9.9285	9.60906	1.83668e-21	1.06334e-20	37.6646	NM_001367562
NR1I3	-1.31485	0.291981	BDH1	622	-1.31485	7.65967	8.26354	2.35544e-16	1.00532e-15	26.0779	NM_203315
NR1I3	-1.31868	0.202134	FAXDC2	10826	-1.31868	6.83167	12.3808	3.93084e-34	4.91355e-33	66.5173	NM_032385
NR1I3	-1.32855	0.113406	ENTPD5	957	-1.32855	8.12076	10.1154	1.45245e-23	9.4386e-23	42.4426	NM_001330189
NR1I3	-1.34641	0.153295	AMBP	259	-1.34641	9.49579	11.669	1.30635e-30	1.28616e-29	58.4869	NM_001633
NR1I3	-1.34784	0.298634	SORD	6652	-1.34784	9.31441	8.81095	2.39008e-18	1.14944e-17	30.5952	NM_003104
NR1I3	-1.35169	0.245587	MUT	4594	-1.35169	9.68894	12.2205	2.53046e-33	2.99009e-32	64.6727
NR1I3	-1.3638	0.30168	SERPINC1	462	-1.3638	12.8576	5.54227	3.32593e-08	8.50279e-08	7.73857	NM_000488
NR1I3	-1.36449	0.216171	APOC3	345	-1.36449	13.021	6.83626	1.03703e-11	3.36048e-11	15.5934	NM_000040
NR1I3	-1.3804	0.350649	ETNK2	55224	-1.3804	7.54291	7.62418	3.56468e-14	1.35127e-13	21.1482	NM_018208
NR1I3	-1.38044	0.142571	GAMT	2593	-1.38044	9.29294	10.7442	2.61731e-26	2.0017e-25	48.687	NM_138924
NR1I3	-1.38128	0.268124	F12	2161	-1.38128	8.79593	10.7851	1.7155e-26	1.32891e-25	49.1047	NM_000505
NR1I3	-1.39004	0.235766	PAH	5053	-1.39004	8.92024	11.5101	7.54593e-30	7.11658e-29	56.751	NM_001354304
NR1I3	-1.39539	0.242289	CRYL1	51084	-1.39539	9.42644	9.43081	9.56742e-21	5.24581e-20	36.0364	NM_015974
NR1I3	-1.39645	0.238795	CYP27A1	1593	-1.39645	10.9469	10.2155	5.43511e-24	3.63542e-23	43.4135	NM_000784
NR1I3	-1.3966	0.175915	F2	2147	-1.3966	10.6942	9.41831	1.07299e-20	5.85093e-20	35.9233	NM_001311257
NR1I3	-1.40748	0.129486	APOA1	335	-1.40748	12.9296	7.58615	4.74894e-14	1.78732e-13	20.8668	NM_001318021
NR1I3	-1.42473	0.237543	BCKDHB	594	-1.42473	6.94385	13.2168	1.69733e-38	2.77162e-37	76.478	NM_183050
NR1I3	-1.43382	0.251386	TFR2	7036	-1.43382	8.60451	12.3566	5.21444e-34	6.46462e-33	66.2374	NM_003227
NR1I3	-1.44441	0.2518	SLCO2B1	11309	-1.44441	8.31783	10.6258	8.83145e-26	6.50003e-25	47.4847	NM_007256
NR1I3	-1.4471	0.364488	PCK2	5106	-1.4471	9.89986	10.6895	4.59488e-26	3.44474e-25	48.1306	NM_004563
NR1I3	-1.45058	0.15131	PC	5091	-1.45058	8.1329	13.5026	4.81214e-40	8.67762e-39	80.011	NM_022172
NR1I3	-1.45791	0.261515	FETUB	26998	-1.45791	6.39693	10.9942	1.93202e-27	1.56896e-26	51.2643	NM_014375
NR1I3	-1.46964	0.293403	ACOX2	8309	-1.46964	10.0062	9.68431	9.07467e-22	5.35366e-21	38.3603	NM_003500
NR1I3	-1.47678	0.245183	RBP4	5950	-1.47678	10.9542	12.3559	5.25636e-34	6.50891e-33	66.2295	NM_006744
NR1I3	-1.50155	0.184784	PROC	5624	-1.50155	10.604	13.0236	1.82005e-37	2.78063e-36	74.1261	NM_000312
NR1I3	-1.50394	0.189956	PEMT	10400	-1.50394	8.53527	12.8503	1.49046e-36	2.13933e-35	72.0417	NM_148173
NR1I3	-1.50853	0.300545	CAT	847	-1.50853	9.64095	14.8729	7.58427e-48	2.40235e-46	97.8354	NM_001752
NR1I3	-1.52881	0.268869	RGN	9104	-1.52881	9.67892	10.9424	3.32783e-27	2.67021e-26	50.7265	NM_152869
NR1I3	-1.53424	0.243186	LIME1	54923	-1.53424	9.10868	12.5377	6.22154e-35	8.14726e-34	68.3438	NM_017806
NR1I3	-1.53477	0.320618	CYP4F3	4051	-1.53477	9.20474	11.4581	1.3331e-29	1.24081e-28	56.1877	NM_001199209
NR1I3	-1.54234	0.279602	HGD	3081	-1.54234	9.74757	12.4046	2.97487e-34	3.7379e-33	66.7934	NM_000187
NR1I3	-1.5523	0.291124	CDO1	1036	-1.5523	10.3334	9.08537	2.16382e-19	1.10195e-18	32.9616	NM_001801
NR1I3	-1.56379	0.171387	ARG1	383	-1.56379	10.0794	9.37761	1.55731e-20	8.43485e-20	35.5559	NM_001244438
NR1I3	-1.56413	0.299258	SEC14L2	23541	-1.56413	6.92379	12.4275	2.27636e-34	2.87815e-33	67.0586	NM_033382
NR1I3	-1.56484	0.338342	ABAT	18	-1.56484	9.07771	13.3875	2.03743e-39	3.52857e-38	78.5799	NM_020686
NR1I3	-1.57424	0.183376	ACADSB	36	-1.57424	8.82961	13.5093	4.42407e-40	7.98974e-39	80.0944	NM_001609
NR1I3	-1.57566	0.240344	TTR	7276	-1.57566	13.2891	8.96177	6.43707e-19	3.1974e-18	31.8874	NM_000371
NR1I3	-1.57833	0.202334	BHMT2	23743	-1.57833	10.013	11.613	2.43018e-30	2.3543e-29	57.8725	NM_017614
NR1I3	-1.5839	0.249756	ITIH1	3697	-1.5839	11.7015	11.049	1.0828e-27	8.93104e-27	51.837	NM_002215
NR1I3	-1.58781	0.215285	SLC25A15	10166	-1.58781	8.87875	11.4276	1.85895e-29	1.71836e-28	55.8587	NM_014252
NR1I3	-1.59521	0.263586	PIPOX	51268	-1.59521	10.5834	11.1802	2.68487e-28	2.30077e-27	53.2165	NM_016518
NR1I3	-1.60313	0.218984	MST1	4485	-1.60313	10.8993	13.9631	1.34992e-42	2.93777e-41	85.8393	NM_020998
NR1I3	-1.60938	0.340063	MASP2	10747	-1.60938	7.52341	13.3133	5.13472e-39	8.64119e-38	77.6634	NM_139208
NR1I3	-1.62148	0.156552	SERPINF2	5345	-1.62148	10.4657	12.5198	7.68456e-35	1.00414e-33	68.1345	NM_001165921
NR1I3	-1.6422	0.196712	CA5A	763	-1.6422	7.13954	14.7675	3.1794e-47	9.64178e-46	96.413	NM_001739
NR1I3	-1.65445	0.261489	AGXT	189	-1.65445	10.8716	10.2426	4.1602e-24	2.79813e-23	43.6776	NM_000030
NR1I3	-1.67168	0.171315	PRODH2	58510	-1.67168	8.36323	13.2545	1.06549e-38	1.75646e-37	76.9396	NM_021232
NR1I3	-1.6813	0.376445	ALDH6A1	4329	-1.6813	9.41797	13.6776	5.2573e-41	1.00974e-39	82.2068	NM_005589
NR1I3	-1.69985	0.281671	OTC	5009	-1.69985	9.74369	9.09183	2.04312e-19	1.04179e-18	33.0182	NM_000531
NR1I3	-1.70091	0.235428	PON3	5446	-1.70091	11.5883	12.3287	7.21685e-34	8.8117e-33	65.9154	NM_000940
NR1I3	-1.7147	0.214666	MTTP	4547	-1.7147	10.1243	11.4262	1.88616e-29	1.74218e-28	55.8443	NM_001300785
NR1I3	-1.72155	0.291437	GCDH	2639	-1.72155	7.75291	17.0134	3.04436e-61	2.72865e-59	128.468	NM_013976
NR1I3	-1.72195	0.21252	G6PC	2538	-1.72195	10.1315	9.94595	7.5233e-23	4.72158e-22	40.8183	NM_001270397
NR1I3	-1.7354	0.280365	CYP2J2	1573	-1.7354	9.61516	13.5624	2.2635e-40	4.16871e-39	80.7589	NM_000775
NR1I3	-1.74084	0.200556	SLCO1B1	10599	-1.74084	8.95367	12.5069	8.95145e-35	1.1659e-33	67.9833	NM_006446
NR1I3	-1.7573	0.157255	SLC38A4	55089	-1.7573	10.0155	10.2256	4.9212e-24	3.30264e-23	43.5116	NM_018018
NR1I3	-1.76642	0.346612	DCXR	51181	-1.76642	11.8281	13.4743	6.86777e-40	1.22747e-38	79.6582	NM_016286
NR1I3	-1.77802	0.211744	RCL1	10171	-1.77802	7.76484	16.8929	1.88325e-60	1.59352e-58	126.657	NM_005772
NR1I3	-1.78917	0.325805	CIDEB	27141	-1.78917	9.70596	13.2788	7.88454e-39	1.31048e-37	77.2382	NM_014430
NR1I3	-1.80882	0.200757	HRG	3273	-1.80882	11.6611	9.64425	1.32164e-21	7.72552e-21	37.9893	NM_000412
NR1I3	-1.81055	0.288629	PLG	5340	-1.81055	11.6009	11.0834	7.52581e-28	6.29318e-27	52.1969	NM_001168338
NR1I3	-1.82206	0.222405	HPX	3263	-1.82206	12.7405	11.3872	2.88484e-29	2.64244e-28	55.4238	NM_000613
NR1I3	-1.85832	0.268348	F11	2160	-1.85832	7.34401	16.7833	9.80543e-60	7.80564e-58	125.018	NM_001354804
NR1I3	-1.91928	0.234316	LPA	4018	-1.91928	8.6006	14.3251	1.18508e-44	2.91453e-43	90.5373	NM_005577
NR1I3	-1.96535	0.214225	SERPINA4	5267	-1.96535	8.87226	14.7686	3.13255e-47	9.52357e-46	96.4277	NM_006215
NR1I3	-1.9686	0.21919	ADH1A	124	-1.9686	12.5946	11.6831	1.11765e-30	1.10577e-29	58.6414	NM_000667
NR1I3	-1.97269	0.278264	MAT1A	4143	-1.97269	10.9465	16.0142	8.21942e-55	4.62581e-53	113.758	NM_000429
NR1I3	-1.97643	0.235757	CPS1	1373	-1.97643	12.3213	10.0269	3.44009e-23	2.19657e-22	41.591	NM_001875
NR1I3	-1.99144	0.237815	ADH6	130	-1.99144	9.24948	14.7128	6.66059e-47	1.96569e-45	95.679	NM_001102470
NR1I3	-2.12008	0.321689	BHMT	635	-2.12008	10.3181	12.1317	7.04028e-33	8.07464e-32	63.6591	NM_001713
NR1I3	-2.16258	0.278267	GNMT	27232	-2.16258	8.47281	11.7849	3.58968e-31	3.66542e-30	59.7658	NM_018960
NR1I3	-2.19429	0.436854	SLC27A5	10998	-2.19429	8.95913	15.6946	8.06528e-53	3.84212e-51	109.204	NM_012254
NR1I3	-2.28531	0.261038	CYP2C9	1559	-2.28531	9.96408	14.5494	5.99846e-46	1.66471e-44	93.4978	NM_000771
NR1I3	-2.33804	0.187908	SPP2	6694	-2.33804	9.88344	11.9405	6.22627e-32	6.61439e-31	61.5004	NM_006944
NR1I3	-2.4349	0.309857	SLC10A1	6554	-2.4349	10.373	12.291	1.1189e-33	1.35658e-32	65.481	NM_003049
NR1I3	-2.56732	0.346657	HPD	3242	-2.56732	11.2454	12.1316	7.04701e-33	8.0747e-32	63.6582	NM_002150
NR1I3	-2.60224	0.227298	LECT2	3950	-2.60224	10.7954	13.8643	4.82704e-42	1.01226e-40	84.5753	NM_002302
NR1I3	-2.69189	0.335662	GLYAT	10249	-2.69189	7.85057	16.0154	8.07484e-55	4.56568e-53	113.776	NM_201648
NR1I3	-2.86447	0.259731	PCK1	5105	-2.86447	10.906	15.8963	4.49756e-54	2.34571e-52	112.07	NM_002591
PPARGC1A	1.84382	-0.117467	HSPB1	3315	1.84382	11.3292	-18.6112	3.85818e-72	9.72583e-70	153.403	NM_001540
PPARGC1A	1.61803	-0.133028	JPT1	51155	1.61803	6.4757	-15.9139	3.49224e-54	1.85541e-52	112.322	NM_016185
PPARGC1A	1.5994	-0.157371	TUBA1C	84790	1.5994	10.898	-17.9741	1.04459e-67	1.75548e-65	143.259	NM_032704
PPARGC1A	1.59141	-0.120837	CCT3	7203	1.59141	9.88935	-19.5444	7.76546e-79	3.75848e-76	168.73	NM_005998
PPARGC1A	1.59131	-0.157723	CLIC1	1192	1.59131	9.54326	-17.0048	3.46849e-61	3.08593e-59	128.338	NM_001288
PPARGC1A	1.59129	-0.124304	TKT	7086	1.59129	8.4359	-13.9356	1.92667e-42	4.1408e-41	85.4864	NM_001258028
PPARGC1A	1.56267	-0.122823	CDK4	1019	1.56267	8.45779	-17.8347	9.41835e-67	1.42453e-64	141.073	NM_000075
PPARGC1A	1.54666	-0.134936	TUBA1B	10376	1.54666	11.0554	-19.2328	1.4198e-76	5.54179e-74	163.552	NM_006082
PPARGC1A	1.5257	-0.125384	ANXA2	302	1.5257	9.37664	-17.0196	2.76879e-61	2.50018e-59	128.562	NM_004039
PPARGC1A	1.52281	-0.12117	NUP37	79023	1.52281	6.77571	-17.6999	7.79704e-66	1.08442e-63	138.973	NM_024057
PPARGC1A	1.41244	-0.120235	TUBB	203068	1.41244	10.238	-14.1753	8.51192e-44	1.98447e-42	88.5811	NM_178014
PPARGC1A	1.39485	-0.122689	MARCKS	4082	1.39485	8.00928	-11.2964	7.71066e-29	6.82509e-28	54.4509	NM_002356
PPARGC1A	1.36747	-0.123724	RPL8	6132	1.36747	11.4521	-15.0092	1.17496e-48	4.01611e-47	99.6865	NM_033301
PPARGC1A	1.29396	-0.0590381	TUBB2A	7280	1.29396	8.07233	-9.61617	1.71868e-21	9.96455e-21	37.7301	NM_001310315
PPARGC1A	1.27911	-0.120458	EIF3H	8667	1.27911	9.49704	-11.3692	3.50807e-29	3.19636e-28	55.2302	NM_003756
PPARGC1A	1.2621	-0.120239	TRMT112	51504	1.2621	10.3081	-12.3378	6.48995e-34	7.95627e-33	66.0206	NM_016404
PPARGC1A	1.15787	-0.0597583	CD151	977	1.15787	8.42593	-6.61184	4.70102e-11	1.46227e-10	14.1175	NM_139030
PPARGC1A	1.12848	-0.104998	FERMT1	55612	1.12848	4.50871	-4.87292	1.17431e-06	2.66738e-06	4.303	NM_017671
PPARGC1A	1.01192	0.0512888	PDHA1	5160	1.01192	8.21111	-0.904796	0.365668	0.418836	-7.06866	NM_001173456
PPARGC1A	1.00857	0.0448189	AVPR1A	552	1.00857	4.42782	-0.428434	0.668375	0.710591	-7.38528	NM_000706
PPARGC1A	-1.02871	0.0685868	CPT1A	1374	-1.02871	6.06802	1.60113	0.109486	0.139789	-6.19919	NM_001876
PPARGC1A	-1.03025	0.108082	SUCLG1	8802	-1.03025	9.67709	1.87102	0.0614691	0.0822761	-5.73252	NM_003849
PPARGC1A	-1.03312	0.0914173	PPP2R1B	5519	-1.03312	7.42622	1.48584	0.137457	0.17232	-6.37646	NM_181700
PPARGC1A	-1.0372	0.0218783	CACNB2	783	-1.0372	4.30046	2.94532	0.00325849	0.00524654	-3.15924	NM_201597
PPARGC1A	-1.06597	0.0709932	JADE1	79960	-1.06597	6.58869	3.7492	0.000181763	0.000338256	-0.488932	NM_199320
PPARGC1A	-1.06896	0.0686526	TIAM1	7074	-1.06896	5.10201	3.25874	0.00113536	0.00193518	-2.1937	NM_003253
PPARGC1A	-1.0716	0.0568619	AFG3L2	10939	-1.0716	7.92302	3.97454	7.26826e-05	0.000140871	0.373346	NM_006796
PPARGC1A	-1.07384	0.120551	EGFR	1956	-1.07384	5.75091	6.14091	9.63384e-10	2.74088e-09	11.1749	NM_201284
PPARGC1A	-1.10147	0.0280256	ARRB1	408	-1.10147	5.09223	7.18388	9.10536e-13	3.14695e-12	17.9728	NM_020251
PPARGC1A	-1.10752	0.0469075	COX4I1	1327	-1.10752	10.0516	8.58042	1.7069e-17	7.74701e-17	28.6597	NM_001861
PPARGC1A	-1.10823	0.0380514	DCPS	28960	-1.10823	8.01268	3.3874	0.000717422	0.00125264	-1.76933	NM_014026
PPARGC1A	-1.10951	0.0857104	SLC2A9	56606	-1.10951	5.28053	5.05866	4.55513e-07	1.07273e-06	5.21305	NM_020041
PPARGC1A	-1.12845	0.0923554	SLC19A2	10560	-1.12845	8.25564	4.98849	6.53929e-07	1.52106e-06	4.86532	NM_006996
PPARGC1A	-1.14979	0.0235924	IDH2	3418	-1.14979	8.21906	5.8634	5.18615e-09	1.40449e-08	9.53942	NM_002168
PPARGC1A	-1.15625	0.0827598	NAV2	89797	-1.15625	7.38417	6.45982	1.27451e-10	3.84865e-10	13.1447	NM_182964
PPARGC1A	-1.16545	0.123362	TOB1	10140	-1.16545	10.8454	5.47719	4.7906e-08	1.20864e-07	7.38562	NM_005749
PPARGC1A	-1.21168	0.119562	NAXD	55739	-1.21168	8.60458	9.03883	3.26712e-19	1.65337e-18	32.5556	NM_018210
PPARGC1A	-1.22876	0.136504	COQ9	57017	-1.22876	8.24328	9.7647	4.24921e-22	2.55798e-21	39.1092	NM_020312
PPARGC1A	-1.23334	0.125493	SLC7A2	6542	-1.23334	5.58744	9.41513	1.10482e-20	6.01905e-20	35.8945	NM_003046
PPARGC1A	-1.23607	0.0841632	NOCT	25819	-1.23607	4.93152	10.6534	6.65729e-26	4.9268e-25	47.7641	NM_012118
PPARGC1A	-1.248	0.171949	LPIN2	9663	-1.248	8.80549	8.95161	7.03582e-19	3.48479e-18	31.7997	NM_014646
PPARGC1A	-1.26116	0.107845	PLCG2	5336	-1.26116	7.21864	10.2885	2.63867e-24	1.78768e-23	44.1274	NM_002661
PPARGC1A	-1.26619	0.101719	MARC1	64757	-1.26619	8.39705	7.1891	8.77112e-13	3.03404e-12	18.0094
PPARGC1A	-1.27194	0.142876	ACO1	48	-1.27194	9.28426	10.4069	8.09713e-25	5.66004e-24	45.2947	NM_002197
PPARGC1A	-1.29288	0.146343	FAHD2A	51011	-1.29288	6.67362	15.6655	1.22018e-52	5.70047e-51	108.793	NM_016044
PPARGC1A	-1.3027	0.153634	ASL	435	-1.3027	9.23778	9.02533	3.68062e-19	1.85719e-18	32.4381	NM_001024946
PPARGC1A	-1.31249	0.130705	PXMP2	5827	-1.31249	9.16257	8.39803	7.81805e-17	3.425e-16	27.1624	NM_018663
PPARGC1A	-1.32996	0.127993	PRKAG2	51422	-1.32996	5.54157	14.7641	3.32712e-47	1.00645e-45	96.3679	NM_024429
PPARGC1A	-1.33547	0.140113	GOT1	2805	-1.33547	11.124	8.45767	4.76884e-17	2.11443e-16	27.6487	NM_002079
PPARGC1A	-1.33555	0.124317	MASP1	5648	-1.33555	6.30632	12.1232	7.76341e-33	8.87037e-32	63.5623	NM_139125
PPARGC1A	-1.35169	0.154651	MUT	4594	-1.35169	9.68894	12.2205	2.53046e-33	2.99009e-32	64.6727
PPARGC1A	-1.35349	0.0459776	FST	10468	-1.35349	8.72125	7.16395	1.04995e-12	3.61537e-12	17.8333	NM_013409
PPARGC1A	-1.35349	0.132898	ETS2	2114	-1.35349	8.62561	10.4493	5.28826e-25	3.73543e-24	45.7157	NM_005239
PPARGC1A	-1.36945	0.145209	PSD3	23362	-1.36945	7.14501	10.4644	4.54052e-25	3.21476e-24	45.8664	NM_206909
PPARGC1A	-1.39651	0.124262	EPB41L4B	54566	-1.39651	6.50411	15.4421	2.8707e-51	1.19777e-49	105.657	NM_019114
PPARGC1A	-1.39877	0.127848	AVPI1	60370	-1.39877	8.44331	11.9032	9.49791e-32	9.9761e-31	61.0823	NM_021732
PPARGC1A	-1.40907	0.114432	HAL	3034	-1.40907	8.18641	6.64376	3.80227e-11	1.18882e-10	14.3246	NM_002108
PPARGC1A	-1.41121	0.127725	SORBS2	8470	-1.41121	7.45758	14.4803	1.51047e-45	4.01686e-44	92.5814	NM_021069
PPARGC1A	-1.41143	0.129552	HMGCS2	3158	-1.41143	11.9894	7.43892	1.42407e-13	5.19169e-13	19.7901	NM_005518
PPARGC1A	-1.42146	0.186518	FOXO1	2308	-1.42146	7.37581	13.3908	1.95438e-39	3.39283e-38	78.6212	NM_002015
PPARGC1A	-1.44235	0.164773	QDPR	5860	-1.44235	9.11916	14.488	1.36246e-45	3.65538e-44	92.6837	NM_001306140
PPARGC1A	-1.45228	0.10618	CPS1-IT1	29034	-1.45228	6.20236	7.76394	1.22819e-14	4.78155e-14	22.1936
PPARGC1A	-1.47478	0.140858	AGL	178	-1.47478	8.77649	15.5666	4.95934e-52	2.16635e-50	107.401	NM_000646
PPARGC1A	-1.47682	0.187295	GOT2	2806	-1.47682	10.7657	14.0147	6.91173e-43	1.53453e-41	86.5033	NM_002080
PPARGC1A	-1.49815	0.169098	ANGPTL4	51129	-1.49815	7.69932	10.0327	3.25111e-23	2.0803e-22	41.6468	NM_139314
PPARGC1A	-1.50922	0.160952	ZBTB16	7704	-1.50922	7.55641	10.5204	2.57942e-25	1.8468e-24	46.4252	NM_006006
PPARGC1A	-1.53319	0.162016	AASS	10157	-1.53319	6.98438	10.1958	6.59859e-24	4.38939e-23	43.2219	NM_005763
PPARGC1A	-1.54234	0.193645	HGD	3081	-1.54234	9.74757	12.4046	2.97487e-34	3.7379e-33	66.7934	NM_000187
PPARGC1A	-1.55865	0.19839	GADD45B	4616	-1.55865	8.04896	12.8498	1.50042e-36	2.15108e-35	72.0351	NM_015675
PPARGC1A	-1.58781	0.243979	SLC25A15	10166	-1.58781	8.87875	11.4276	1.85895e-29	1.71836e-28	55.8587	NM_014252
PPARGC1A	-1.59439	0.180698	ALDOB	229	-1.59439	10.4347	10.3923	9.37649e-25	6.53923e-24	45.1497	NM_000035
PPARGC1A	-1.5945	0.146602	SLC27A2	11001	-1.5945	10.25	9.45328	7.78222e-21	4.29584e-20	36.2401	NM_003645
PPARGC1A	-1.60285	0.166067	GADD45G	10912	-1.60285	7.34102	11.1545	3.53181e-28	2.99474e-27	52.9453	NM_006705
PPARGC1A	-1.60313	0.135007	MST1	4485	-1.60313	10.8993	13.9631	1.34992e-42	2.93777e-41	85.8393	NM_020998
PPARGC1A	-1.63353	0.132959	SRD5A1	6715	-1.63353	7.77863	14.5777	4.10796e-46	1.14267e-44	93.8735	NM_001324323
PPARGC1A	-1.65445	0.14808	AGXT	189	-1.65445	10.8716	10.2426	4.1602e-24	2.79813e-23	43.6776	NM_000030
PPARGC1A	-1.6813	0.140208	ALDH6A1	4329	-1.6813	9.41797	13.6776	5.2573e-41	1.00974e-39	82.2068	NM_005589
PPARGC1A	-1.69247	0.138133	GRAMD1C	54762	-1.69247	6.92388	12.4368	2.04176e-34	2.59237e-33	67.1663	NM_017577
PPARGC1A	-1.70091	0.128624	PON3	5446	-1.70091	11.5883	12.3287	7.21685e-34	8.8117e-33	65.9154	NM_000940
PPARGC1A	-1.72195	0.161211	G6PC	2538	-1.72195	10.1315	9.94595	7.5233e-23	4.72158e-22	40.8183	NM_001270397
PPARGC1A	-1.72415	0.177208	GABARAPL1	23710	-1.72415	8.98563	16.6018	1.4779e-58	1.06444e-56	122.324	NM_031412
PPARGC1A	-1.72763	0.125672	CYP3A43	64816	-1.72763	6.77171	15.1166	2.67671e-49	9.55403e-48	101.155	NM_057096
PPARGC1A	-1.73561	0.136331	ETFDH	2110	-1.73561	8.60531	15.5209	9.46208e-52	4.05997e-50	106.759	NM_004453
PPARGC1A	-1.73693	0.16449	ACACB	32	-1.73693	7.8906	17.3359	2.20742e-63	2.47312e-61	133.363	NM_001093
PPARGC1A	-1.74315	0.13742	CPEB3	22849	-1.74315	6.38668	18.4481	5.39833e-71	1.25615e-68	150.78	NM_014912
PPARGC1A	-1.75217	0.195527	ASS1	445	-1.75217	11.8449	16.9211	1.23128e-60	1.04919e-58	127.08	NM_054012
PPARGC1A	-1.77802	0.178535	RCL1	10171	-1.77802	7.76484	16.8929	1.88325e-60	1.59352e-58	126.657	NM_005772
PPARGC1A	-1.83085	0.159506	ETNPPL	64850	-1.83085	9.05566	10.458	4.84316e-25	3.42503e-24	45.8026	NM_031279
PPARGC1A	-1.84023	0.205205	SOCS2	8835	-1.84023	7.09998	13.9082	2.74379e-42	5.87609e-41	85.1357	NM_003877
PPARGC1A	-1.95513	0.177397	CTH	1491	-1.95513	8.45672	13.0416	1.46205e-37	2.23652e-36	74.3432	NM_153742
PPARGC1A	-1.97643	0.148148	CPS1	1373	-1.97643	12.3213	10.0269	3.44009e-23	2.19657e-22	41.591	NM_001875
PPARGC1A	-1.99833	0.120551	CYP4A22	284541	-1.99833	7.67521	13.8757	4.17077e-42	8.77676e-41	84.7203	NM_001308102
PPARGC1A	-2.10953	0.146616	ABCA8	10351	-2.10953	7.13791	16.3522	5.9295e-57	3.89929e-55	118.656	NM_007168
PPARGC1A	-2.16258	0.132302	GNMT	27232	-2.16258	8.47281	11.7849	3.58968e-31	3.66542e-30	59.7658	NM_018960
PPARGC1A	-2.17304	0.14845	PROZ	8858	-2.17304	6.79456	16.1876	6.61183e-56	4.06107e-54	116.261	NM_003891
PPARGC1A	-2.18743	0.226964	OGDHL	55753	-2.18743	8.03429	16.3015	1.24929e-56	7.99811e-55	117.916	NM_018245
PPARGC1A	-2.28519	0.202884	FBP1	2203	-2.28519	10.468	15.4686	1.97708e-51	8.33543e-50	106.027	NM_001127628
PPARGC1A	-2.31306	0.213151	GLS2	27165	-2.31306	7.0586	14.5188	9.02816e-46	2.46593e-44	93.0921	NM_013267
PPARGC1A	-2.34323	0.177152	KLKB1	3818	-2.34323	9.75447	17.9818	9.2549e-68	1.57724e-65	143.379	NM_001318396
PPARGC1A	-2.4221	0.189776	TAT	6898	-2.4221	8.48607	14.5036	1.10722e-45	2.99717e-44	92.8896	NM_000353
PPARGC1A	-2.47692	0.152877	GHR	2690	-2.47692	9.89118	16.5197	4.99964e-58	3.49686e-56	121.113	NM_001242462
PPARGC1A	-2.51924	0.126097	DNASE1L3	1776	-2.51924	7.73334	17.573	5.63292e-65	7.40852e-63	137.008	NM_004944
PPARGC1A	-2.52317	0.186836	KMO	8564	-2.52317	7.79605	17.7517	3.46594e-66	4.9926e-64	139.778	NM_003679
PPARGC1A	-2.6814	0.155297	RDH16	8608	-2.6814	9.76651	15.9078	3.8132e-54	2.01483e-52	112.234	NM_003708
PPARGC1A	-2.69164	0.268397	SDS	10993	-2.69164	8.76027	13.3027	5.86111e-39	9.80905e-38	77.5322	NM_006843
PPARGC1A	-2.72678	0.135802	HAO2	51179	-2.72678	7.86115	15.0646	5.48737e-49	1.90796e-47	100.442	NM_016527
PPARGC1A	-2.75801	0.133836	F9	2158	-2.75801	11.1356	15.4012	5.09242e-51	2.07469e-49	105.088	NM_001313913
PPARGC1A	-2.86447	0.200808	PCK1	5105	-2.86447	10.906	15.8963	4.49756e-54	2.34571e-52	112.07	NM_002591
PRDM4	1.61426	0.154769	LAMC1	3915	1.61426	8.52554	-15.7471	3.81515e-53	1.83918e-51	109.947	NM_002293
PRDM4	1.51426	0.151443	CENPF	1063	1.51426	5.14852	-15.5431	6.92032e-52	2.99057e-50	107.07	NM_016343
PRDM4	1.41655	0.141356	RUSC1	23623	1.41655	6.76234	-12.3995	3.16037e-34	3.96274e-33	66.7335	NM_014328
PRDM4	1.38592	0.156966	LRRC1	55227	1.38592	5.15104	-13.435	1.12411e-39	1.98275e-38	79.1696	NM_018214
PRDM4	1.31654	0.173998	RNF34	80196	1.31654	6.16148	-15.0867	4.04132e-49	1.42565e-47	100.746	NM_194271
PRDM4	1.29098	0.166933	TMEM184B	25829	1.29098	6.88808	-13.6231	1.05057e-40	1.97389e-39	81.5202	NM_012264
PRDM4	1.28287	0.158565	MAPK13	5603	1.28287	5.10936	-8.06707	1.14572e-15	4.71377e-15	24.523	NM_002754
PRDM4	1.26925	0.0733119	ZNF165	7718	1.26925	4.79682	-8.99044	5.00456e-19	2.50435e-18	32.1354	NM_003447
PRDM4	1.26058	0.129175	MFSD5	84975	1.26058	6.26772	-10.1629	9.12443e-24	6.01337e-23	42.9018	NM_032889
PRDM4	1.23842	0.12908	AP3M2	10947	1.23842	5.02181	-12.2447	1.91433e-33	2.2821e-32	64.9491	NM_006803
PRDM4	1.23391	0.153947	LMNB2	84823	1.23391	4.66223	-13.223	1.57261e-38	2.57491e-37	76.5536	NM_032737
PRDM4	1.21439	0.13974	PHIP	55023	1.21439	7.4453	-10.1559	9.77047e-24	6.41121e-23	42.8342	NM_017934
PRDM4	1.18672	0.165314	MFSD10	10227	1.18672	6.01149	-6.92976	5.44962e-12	1.79968e-11	16.2223	NM_001363679
PRDM4	1.18611	0.162043	TUG1	55000	1.18611	8.74105	-9.01962	3.87081e-19	1.94747e-18	32.3885
PRDM4	1.18274	0.191681	VPS37C	55048	1.18274	7.14281	-10.1415	1.12559e-23	7.36592e-23	42.6944	NM_017966
PRDM4	1.18165	0.137661	NAT10	55226	1.18165	7.2247	-10.7052	3.90973e-26	2.94202e-25	48.2902	NM_024662
PRDM4	1.16265	0.0906387	PRR15L	79170	1.16265	4.55189	-5.49202	4.40983e-08	1.11583e-07	7.4657	NM_024320
PRDM4	1.16103	0.083828	RAB11A	8766	1.16103	8.78977	-9.59202	2.15316e-21	1.24122e-20	37.5077	NM_004663
PRDM4	1.15687	0.195097	DYRK2	8445	1.15687	6.12605	-8.59739	1.47936e-17	6.74462e-17	28.8005	NM_006482
PRDM4	1.14635	0.115011	VEZF1	7716	1.14635	7.94945	-8.52656	2.68369e-17	1.20447e-16	28.2144	NM_007146
PRDM4	1.14414	0.177592	GOLGA3	2802	1.14414	7.32257	-8.22669	3.17739e-16	1.34711e-15	25.7836	NM_005895
PRDM4	1.1433	0.0787891	RIC8B	55188	1.1433	6.06451	-8.20178	3.8876e-16	1.64188e-15	25.5853	NM_018157
PRDM4	1.14304	0.166786	PLXNA1	5361	1.14304	5.48142	-8.63076	1.11564e-17	5.13084e-17	29.0783	NM_032242
PRDM4	1.12579	0.164337	ZNF142	7701	1.12579	5.34425	-9.8158	2.61565e-22	1.59282e-21	39.5881	NM_001366291
PRDM4	1.11919	0.171571	GCN1	10985	1.11919	7.70347	-6.35885	2.44287e-10	7.22706e-10	12.5106	NM_006836
PRDM4	1.11253	0.0883364	CHFR	55743	1.11253	6.42382	-5.81567	6.87744e-09	1.84394e-08	9.26556	NM_018223
PRDM4	1.10191	0.185334	TDG	6996	1.10191	7.68728	-4.94725	8.07029e-07	1.86036e-06	4.66316	NM_003211
PRDM4	1.09233	0.100888	CRTC3	64784	1.09233	7.48231	-4.61962	4.05616e-06	8.77832e-06	3.11564	NM_022769
PRDM4	1.08758	0.141738	DENR	8562	1.08758	8.11184	-4.02904	5.78183e-05	0.00011304	0.589353	NM_003677
PRDM4	1.08449	0.177516	KANSL2	54934	1.08449	7.19192	-5.20096	2.15737e-07	5.2104e-07	5.9328	NM_017822
PRDM4	1.07364	0.0844801	RAB35	11021	1.07364	5.50775	-8.27253	2.18915e-16	9.37322e-16	26.1498	NM_006861
PRDM4	1.07212	0.0895054	TRAFD1	10906	1.07212	5.43074	-6.67976	2.98988e-11	9.42614e-11	14.5592	NM_006700
PRDM4	1.04274	0.0996751	JADE2	23338	1.04274	5.42459	-3.33443	0.000868269	0.00149979	-1.94601	NM_015288
PRDM4	-0.999679	0.0359085	ULK2	9706	-0.999679	4.52439	-0.0318578	0.974588	0.97912	-7.4763	NM_014683
PRDM4	-1.00102	0.0906766	ADO	84890	-1.00102	6.78989	0.0769239	0.938691	0.948203	-7.47386	NM_032804
PRDM4	-1.00216	0.0516225	CCAR2	57805	-1.00216	4.68753	0.327392	0.743401	0.778352	-7.42336	NM_021174
PRDM4	-1.00303	-0.0900726	SERPINA1	5265	-1.00303	10.8144	0.237401	0.812367	0.839341	-7.4487	NM_001127707
PRDM4	-1.01862	0.0540996	TIMM22	29928	-1.01862	5.50966	1.40324	0.16068	0.198552	-6.49535	NM_013337
PRDM4	-1.15692	-0.17412	CYB5A	1528	-1.15692	10.7398	5.13223	3.10255e-07	7.40305e-07	5.58273	NM_148923
PRDM4	-1.15692	-0.14979	F13B	2165	-1.15692	8.71216	2.98831	0.00283484	0.00460424	-3.03252	NM_001994
PRDM4	-1.20055	-0.158176	ACYP2	98	-1.20055	7.0144	7.01484	3.01354e-12	1.01036e-11	16.8016	NM_138448
PRDM4	-1.202	-0.168919	CFHR2	3080	-1.202	12.361	4.16394	3.24295e-05	6.49772e-05	1.13649	NM_005666
PRDM4	-1.21119	-0.0635355	ALB	213	-1.21119	12.8954	7.01459	3.01881e-12	1.01184e-11	16.7999	NM_000477
PRDM4	-1.26269	-0.155691	SELENOP	6414	-1.26269	10.918	9.63365	1.45953e-21	8.50681e-21	37.8914	NM_005410
PRDM4	-1.28324	-0.16804	SCP2	6342	-1.28324	10.4725	10.8737	6.83205e-27	5.37851e-26	50.0151	NM_002979
PRDM4	-1.30199	-0.178893	ACADM	34	-1.30199	10.7561	9.537	3.59131e-21	2.02965e-20	37.003	NM_001286044
PRDM4	-1.31485	-0.150856	BDH1	622	-1.31485	7.65967	8.26354	2.35544e-16	1.00532e-15	26.0779	NM_203315
PRDM4	-1.35947	-0.17952	CPB2	1361	-1.35947	12.0786	8.27403	2.16266e-16	9.26635e-16	26.1618	NM_001872
PRDM4	-1.36023	-0.171289	SERPING1	710	-1.36023	11.5108	11.6196	2.25897e-30	2.19195e-29	57.9448	NM_001032295
PRDM4	-1.3638	-0.164007	SERPINC1	462	-1.3638	12.8576	5.54227	3.32593e-08	8.50279e-08	7.73857	NM_000488
PRDM4	-1.36571	-0.16057	HAGH	3029	-1.36571	9.42174	11.0028	1.76386e-27	1.445e-26	51.3543	NM_005326
PRDM4	-1.39292	-0.145338	FGA	2243	-1.39292	12.5112	9.24735	5.07948e-20	2.68158e-19	34.3902	NM_021871
PRDM4	-1.42473	-0.149351	BCKDHB	594	-1.42473	6.94385	13.2168	1.69733e-38	2.77162e-37	76.478	NM_183050
PRDM4	-1.42771	-0.156097	BAAT	570	-1.42771	11.028	7.29445	4.10335e-13	1.45432e-12	18.7532	NM_001701
PRDM4	-1.43643	-0.165613	C1S	716	-1.43643	11.3729	9.29052	3.43843e-20	1.83282e-19	34.7749	NM_201442
PRDM4	-1.4471	-0.16851	PCK2	5106	-1.4471	9.89986	10.6895	4.59488e-26	3.44474e-25	48.1306	NM_004563
PRDM4	-1.47678	-0.156785	RBP4	5950	-1.47678	10.9542	12.3559	5.25636e-34	6.50891e-33	66.2295	NM_006744
PRDM4	-1.48145	-0.162795	MTHFD1	4522	-1.48145	8.86605	14.3518	8.32574e-45	2.07287e-43	90.8876	NM_005956
PRDM4	-1.50033	-0.150866	CES1	1066	-1.50033	11.8808	9.32627	2.48601e-20	1.33633e-19	35.0947	NM_001266
PRDM4	-1.50853	-0.152535	CAT	847	-1.50853	9.64095	14.8729	7.58427e-48	2.40235e-46	97.8354	NM_001752
PRDM4	-1.54137	-0.162494	C1R	715	-1.54137	10.2536	12.5047	9.19191e-35	1.19465e-33	67.957	NM_001733
PRDM4	-1.5471	-0.198095	EHHADH	1962	-1.5471	10.1398	10.3528	1.39175e-24	9.62848e-24	44.7595	NM_001966
PRDM4	-1.54961	-0.169223	GRHPR	9380	-1.54961	10.2831	14.1195	1.76683e-43	4.04134e-42	87.8565	NM_012203
PRDM4	-1.55639	-0.199493	RIDA	10247	-1.55639	10.1918	11.7138	7.94435e-31	7.93779e-30	58.9793	NM_005836
PRDM4	-1.56402	-0.144091	ANGPTL3	27329	-1.56402	9.79338	10.6955	4.31942e-26	3.24426e-25	48.1917	NM_014495
PRDM4	-1.56484	-0.170372	ABAT	18	-1.56484	9.07771	13.3875	2.03743e-39	3.52857e-38	78.5799	NM_020686
PRDM4	-1.59413	-0.154425	ABCB4	5244	-1.59413	9.65047	9.49794	5.15554e-21	2.8774e-20	36.6463	NM_018850
PRDM4	-1.59521	-0.15605	PIPOX	51268	-1.59521	10.5834	11.1802	2.68487e-28	2.30077e-27	53.2165	NM_016518
PRDM4	-1.60938	-0.164748	MASP2	10747	-1.60938	7.52341	13.3133	5.13472e-39	8.64119e-38	77.6634	NM_139208
PRDM4	-1.6367	-0.149247	AR	367	-1.6367	6.60489	14.4485	2.30585e-45	6.03913e-44	92.1616	NM_001348064
PRDM4	-1.6396	-0.164241	HP	3240	-1.6396	14.1115	9.51449	4.42417e-21	2.4818e-20	36.7972	NM_005143
PRDM4	-1.64035	-0.191249	HSD17B6	8630	-1.64035	11.5754	7.98267	2.23643e-15	9.06254e-15	23.866	NM_003725
PRDM4	-1.65463	-0.177114	ABCA6	23460	-1.65463	8.6529	12.3637	4.803e-34	5.97904e-33	66.3188	NM_080284
PRDM4	-1.67842	-0.165036	CFI	3426	-1.67842	11.1635	14.8034	1.95371e-47	6.03058e-46	96.8963	NM_001331035
PRDM4	-1.6813	-0.177739	ALDH6A1	4329	-1.6813	9.41797	13.6776	5.2573e-41	1.00974e-39	82.2068	NM_005589
PRDM4	-1.69995	-0.203163	HPR	3250	-1.69995	11.409	9.93302	8.51994e-23	5.32772e-22	40.6955	NM_020995
PRDM4	-1.7354	-0.189662	CYP2J2	1573	-1.7354	9.61516	13.5624	2.2635e-40	4.16871e-39	80.7589	NM_000775
PRDM4	-1.74084	-0.154413	SLCO1B1	10599	-1.74084	8.95367	12.5069	8.95145e-35	1.1659e-33	67.9833	NM_006446
PRDM4	-1.76642	-0.156264	DCXR	51181	-1.76642	11.8281	13.4743	6.86777e-40	1.22747e-38	79.6582	NM_016286
PRDM4	-1.77284	-0.163316	ACSM2A	123876	-1.77284	9.17842	11.9515	5.49845e-32	5.86178e-31	61.6235	NM_001308954
PRDM4	-1.81055	-0.187329	PLG	5340	-1.81055	11.6009	11.0834	7.52581e-28	6.29318e-27	52.1969	NM_001168338
PRDM4	-1.82206	-0.193067	HPX	3263	-1.82206	12.7405	11.3872	2.88484e-29	2.64244e-28	55.4238	NM_000613
PRDM4	-1.83085	-0.191124	ETNPPL	64850	-1.83085	9.05566	10.458	4.84316e-25	3.42503e-24	45.8026	NM_031279
PRDM4	-1.84648	-0.182316	C8B	732	-1.84648	10.8802	12.549	5.44708e-35	7.17189e-34	68.4755	NM_001278544
PRDM4	-1.85335	-0.155361	CYP4F2	8529	-1.85335	9.04708	14.3148	1.35834e-44	3.3137e-43	90.4019	NM_001082
PRDM4	-1.85832	-0.178507	F11	2160	-1.85832	7.34401	16.7833	9.80543e-60	7.80564e-58	125.018	NM_001354804
PRDM4	-1.88135	-0.160089	AZGP1	563	-1.88135	11.4332	13.9666	1.28957e-42	2.81149e-41	85.8846	NM_001185
PRDM4	-1.91401	-0.199826	HAO1	54363	-1.91401	10.0159	12.7651	4.15676e-36	5.80794e-35	71.0252	NM_017545
PRDM4	-1.91928	-0.161439	LPA	4018	-1.91928	8.6006	14.3251	1.18508e-44	2.91453e-43	90.5373	NM_005577
PRDM4	-1.93565	-0.169895	AKR7A3	22977	-1.93565	8.95352	14.6287	2.07124e-46	5.86932e-45	94.5531	NM_012067
PRDM4	-1.94907	-0.161254	AQP9	366	-1.94907	10.8949	11.0636	9.27825e-28	7.68951e-27	51.9898	NM_020980
PRDM4	-1.95513	-0.162842	CTH	1491	-1.95513	8.45672	13.0416	1.46205e-37	2.23652e-36	74.3432	NM_153742
PRDM4	-1.99695	-0.164952	ACSM5	54988	-1.99695	7.79987	14.822	1.51698e-47	4.73078e-46	97.1474	NM_017888
PRDM4	-1.99833	-0.154751	CYP4A22	284541	-1.99833	7.67521	13.8757	4.17077e-42	8.77676e-41	84.7203	NM_001308102
PRDM4	-2.19429	-0.180643	SLC27A5	10998	-2.19429	8.95913	15.6946	8.06528e-53	3.84212e-51	109.204	NM_012254
PRDM4	-2.24139	-0.160577	HSD11B1	3290	-2.24139	10.2403	10.6094	1.04345e-25	7.65196e-25	47.3198	NM_181755
PRDM4	-2.3971	-0.154534	ANXA10	11199	-2.3971	8.07242	16.3292	8.32111e-57	5.4132e-55	118.32	NM_007193
PRDM4	-2.39851	-0.212522	C8A	731	-2.39851	10.9524	16.0214	7.3967e-55	4.2217e-53	113.863	NM_000562
PRDM4	-2.4221	-0.155348	TAT	6898	-2.4221	8.48607	14.5036	1.10722e-45	2.99717e-44	92.8896	NM_000353
PRDM4	-2.4349	-0.151493	SLC10A1	6554	-2.4349	10.373	12.291	1.1189e-33	1.35658e-32	65.481	NM_003049
PRDM4	-2.47534	-0.185849	GYS2	2998	-2.47534	8.08895	14.222	4.61546e-44	1.08652e-42	89.1883	NM_021957
PRDM4	-2.59572	-0.153314	ADH1C	126	-2.59572	11.5446	13.9458	1.68812e-42	3.65407e-41	85.6175	NM_000669
PRDM4	-2.69189	-0.183919	GLYAT	10249	-2.69189	7.85057	16.0154	8.07484e-55	4.56568e-53	113.776	NM_201648
PRDM4	-2.96809	-0.176773	ADH1B	125	-2.96809	10.3929	17.9839	8.95473e-68	1.54789e-65	143.412	NM_001286650
PTTG1	2.67674	0.844862	TOP2A	7153	2.67674	6.04156	-19.2573	9.45195e-77	3.81229e-74	163.956	NM_001067
PTTG1	2.59641	0.649655	CDKN3	1033	2.59641	5.30374	-19.8597	3.76117e-81	2.84438e-78	174.029	NM_005192
PTTG1	2.59246	0.768154	PRC1	9055	2.59246	5.88197	-19.5946	3.33597e-79	1.68188e-76	169.57	NM_199413
PTTG1	2.57759	0.601759	ASPM	259266	2.57759	6.13003	-18.8628	6.37554e-74	2.14289e-71	157.481	NM_018136
PTTG1	2.45468	0.635813	CDC20	991	2.45468	5.53228	-19.3659	1.54665e-77	6.93128e-75	165.756	NM_001255
PTTG1	2.31699	0.229296	MDK	4192	2.31699	6.39922	-18.1509	6.31344e-69	1.21258e-66	146.047	NM_002391
PTTG1	2.11221	0.689133	NCAPG	64151	2.11221	5.69448	-18.6561	1.85921e-72	4.9992e-70	154.128	NM_022346
PTTG1	2.07157	0.472549	RRM2	6241	2.07157	6.12105	-14.0962	2.39532e-43	5.42759e-42	87.5546	NM_182626
PTTG1	2.05785	0.681753	NUSAP1	51203	2.05785	6.48134	-18.7727	2.78186e-73	8.41513e-71	156.016	NM_018454
PTTG1	2.03998	0.65176	RACGAP1	29127	2.03998	6.39918	-18.3245	3.93572e-70	8.65858e-68	148.806	NM_013277
PTTG1	1.98788	0.680431	MELK	9833	1.98788	5.89582	-17.0242	2.58569e-61	2.35239e-59	128.63	NM_014791
PTTG1	1.98759	0.486714	PBK	55872	1.98759	5.05766	-16.3441	6.68265e-57	4.37082e-55	118.538	NM_018492
PTTG1	1.9851	0.706139	UBE2C	11065	1.9851	6.32331	-18.6851	1.16037e-72	3.26523e-70	154.597	NM_181801
PTTG1	1.97571	0.211239	SQLE	6713	1.97571	6.68688	-16.4097	2.54266e-57	1.71878e-55	119.497	NM_003129
PTTG1	1.96773	0.573937	CCNB1	891	1.96773	5.67338	-15.635	1.88208e-52	8.62619e-51	108.363	NM_031966
PTTG1	1.95415	0.732674	KIF20A	10112	1.95415	5.11635	-17.4286	5.2796e-64	6.14261e-62	134.784	NM_005733
PTTG1	1.93513	0.744045	CCNB2	9133	1.93513	5.11078	-19.2667	8.08995e-77	3.37546e-74	164.111	NM_004701
PTTG1	1.9102	0.651369	TPX2	22974	1.9102	5.62976	-16.1921	6.19486e-56	3.82438e-54	116.326	NM_012112
PTTG1	1.90057	0.618516	HMMR	3161	1.90057	5.37844	-17.5084	1.53722e-64	1.93753e-62	136.01	NM_012485
PTTG1	1.86825	0.524039	ZWINT	11130	1.86825	6.24681	-15.2202	6.36943e-50	2.37139e-48	102.58	NM_032997
PTTG1	1.86186	0.571017	DLGAP5	9787	1.86186	4.93678	-16.6731	5.10037e-59	3.8332e-57	123.38	NM_014750
PTTG1	1.85789	0.528966	RFC4	5984	1.85789	6.91055	-17.4527	3.64021e-64	4.31828e-62	135.154	NM_181573
PTTG1	1.85603	0.463709	TTK	7272	1.85603	5.23048	-14.8392	1.20101e-47	3.77459e-46	97.3792	NM_003318
PTTG1	1.83779	0.129251	AKR1C3	8644	1.83779	11.7843	-18.0669	2.40383e-68	4.40702e-66	144.719	NM_003739
PTTG1	1.81095	0.447995	CKS2	1164	1.81095	7.87691	-15.9371	2.50014e-54	1.34452e-52	112.654	NM_001827
PTTG1	1.81003	0.496576	EZH2	2146	1.81003	5.6625	-15.9454	2.21903e-54	1.20405e-52	112.772	NM_152998
PTTG1	1.80119	0.423529	ECT2	1894	1.80119	5.46446	-16.8449	3.88222e-60	3.21746e-58	125.939	NM_018098
PTTG1	1.75522	0.513872	KIF4A	24137	1.75522	4.79548	-15.6857	9.14975e-53	4.32468e-51	109.079	NM_012310
PTTG1	1.7422	0.531683	AURKA	6790	1.7422	5.64706	-18.5113	1.94451e-71	4.80176e-69	151.795	NM_198437
PTTG1	1.7403	0.452802	NDC80	10403	1.7403	5.40353	-14.38	5.73184e-45	1.4449e-43	91.258	NM_006101
PTTG1	1.74024	0.451642	RNASEH2A	10535	1.74024	5.50746	-18.7122	7.46232e-73	2.14986e-70	155.036	NM_006397
PTTG1	1.72269	0.522173	CDK1	983	1.72269	5.09275	-15.8848	5.30571e-54	2.74355e-52	111.906	NM_033379
PTTG1	1.67915	0.376622	SAE1	10055	1.67915	8.0197	-21.2811	6.64348e-92	2.00965e-88	198.65	NM_005500
PTTG1	1.67246	0.473699	HJURP	55355	1.67246	4.92363	-16.6424	8.06637e-59	5.91534e-57	122.925	NM_018410
PTTG1	1.66919	0.284342	UCK2	7371	1.66919	6.08591	-18.3356	3.2962e-70	7.38593e-68	148.982	NM_012474
PTTG1	1.65871	0.436899	TRIP13	9319	1.65871	4.96799	-14.2675	2.53653e-44	6.08969e-43	89.7823	NM_004237
PTTG1	1.64988	0.50376	MCM6	4175	1.64988	7.21321	-17.7303	4.84311e-66	6.8943e-64	139.446	NM_005915
PTTG1	1.62715	0.528317	CCNA2	890	1.62715	5.28894	-15.5882	3.65513e-52	1.63199e-50	107.704	NM_001237
PTTG1	1.61803	0.297195	JPT1	51155	1.61803	6.4757	-15.9139	3.49224e-54	1.85541e-52	112.322	NM_016185
PTTG1	1.61381	0.162674	PSPH	5723	1.61381	6.58552	-15.4187	3.98645e-51	1.64068e-49	105.331	NM_004577
PTTG1	1.60542	0.468062	OIP5	11339	1.60542	4.82483	-15.4796	1.69324e-51	7.16373e-50	106.181	NM_007280
PTTG1	1.60074	0.0980079	S100A10	6281	1.60074	10.2168	-16.4619	1.17642e-57	8.08788e-56	120.263	NM_002966
PTTG1	1.5994	0.332275	TUBA1C	84790	1.5994	10.898	-17.9741	1.04459e-67	1.75548e-65	143.259	NM_032704
PTTG1	1.58781	0.333486	KPNA2	3838	1.58781	8.15646	-15.8654	7.01439e-54	3.56614e-52	111.629	NM_002266
PTTG1	1.56999	0.428105	NEK2	4751	1.56999	5.02286	-15.3915	5.83433e-51	2.36897e-49	104.953	NM_002497
PTTG1	1.56854	0.141685	RRAGD	58528	1.56854	7.68807	-12.9878	2.81552e-37	4.24257e-36	73.6936	NM_021244
PTTG1	1.56744	0.205926	IGF2BP3	10643	1.56744	4.65307	-12.3618	4.90575e-34	6.10068e-33	66.2979	NM_006547
PTTG1	1.55565	0.45978	RAD51AP1	10635	1.55565	5.70757	-13.163	3.29682e-38	5.27665e-37	75.8198	NM_006479
PTTG1	1.54808	0.386817	TUBG1	7283	1.54808	7.27609	-16.5626	2.64596e-58	1.8833e-56	121.745	NM_001070
PTTG1	1.54666	0.392326	TUBA1B	10376	1.54666	11.0554	-19.2328	1.4198e-76	5.54179e-74	163.552	NM_006082
PTTG1	1.52419	0.450562	KIF14	9928	1.52419	5.02217	-13.3543	3.0834e-39	5.29207e-38	78.1691	NM_014875
PTTG1	1.52281	0.319788	NUP37	79023	1.52281	6.77571	-17.6999	7.79704e-66	1.08442e-63	138.973	NM_024057
PTTG1	1.51907	0.361411	H2AFZ	3015	1.51907	9.87648	-15.25	4.21171e-50	1.59255e-48	102.991	NM_002106
PTTG1	1.51426	0.488633	CENPF	1063	1.51426	5.14852	-15.5431	6.92032e-52	2.99057e-50	107.07	NM_016343
PTTG1	1.50621	0.489673	PCLAF	9768	1.50621	6.71657	-14.9314	3.41177e-48	1.1218e-46	98.6283	NM_014736
PTTG1	1.48925	0.433874	MAD2L1	4085	1.48925	5.25188	-13.3199	4.72887e-39	8.0027e-38	77.745	NM_002358
PTTG1	1.47865	0.276753	VPS72	6944	1.47865	6.65986	-17.4771	2.49453e-64	2.98849e-62	135.529	NM_005997
PTTG1	1.47519	0.317155	DDX39A	10212	1.47519	8.01608	-16.8338	4.58862e-60	3.77702e-58	125.773	NM_005804
PTTG1	1.46906	0.368165	SPDL1	54908	1.46906	5.13683	-15.1647	1.37663e-49	5.04763e-48	101.815	NM_017785
PTTG1	1.45931	0.0650586	MAGEA1	4100	1.45931	4.62577	-9.21385	6.86794e-20	3.59594e-19	34.0928	NM_004988
PTTG1	1.44753	0.380343	CKAP5	9793	1.44753	6.57567	-17.5398	9.43266e-65	1.20142e-62	136.495	NM_014756
PTTG1	1.44587	0.328067	TK1	7083	1.44587	5.00655	-14.3681	6.70863e-45	1.67716e-43	91.1019	NM_003258
PTTG1	1.44368	0.186686	RFX5	5993	1.44368	6.73969	-16.3703	4.54793e-57	3.0071e-55	118.92	NM_001025603
PTTG1	1.43905	0.154768	IRAK1	3654	1.43905	7.82919	-16.4753	9.65635e-58	6.67667e-56	120.459	NM_001569
PTTG1	1.41805	0.270353	CDC25B	994	1.41805	6.88781	-12.1044	9.62505e-33	1.09458e-31	63.3494	NM_021873
PTTG1	1.41716	0.169165	GARS	2617	1.41716	9.23856	-15.4916	1.42935e-51	6.06846e-50	106.35	NM_002047
PTTG1	1.4146	0.133253	GLA	2717	1.4146	7.54722	-14.6837	9.86235e-47	2.86862e-45	95.2895	NM_000169
PTTG1	1.4046	0.230167	FAM189B	10712	1.4046	5.97251	-17.0272	2.46942e-61	2.26364e-59	128.676	NM_198264
PTTG1	1.39094	0.211408	RFXANK	8625	1.39094	6.67709	-16.2418	2.99595e-56	1.87829e-54	117.047	NM_134440
PTTG1	1.37974	0.291819	SPATS2	65244	1.37974	5.58776	-14.9241	3.76797e-48	1.2256e-46	98.5298	NM_023071
PTTG1	1.36709	0.445113	CENPA	1058	1.36709	4.50677	-15.3629	8.71087e-51	3.49012e-49	104.555	NM_001809
PTTG1	1.34445	0.325002	LMNB1	4001	1.34445	5.63193	-10.5714	1.53631e-25	1.11782e-24	46.9374	NM_005573
PTTG1	1.33322	0.225782	CANT1	124583	1.33322	6.86591	-14.6774	1.07377e-46	3.10086e-45	95.2051	NM_138793
PTTG1	1.33031	0.256881	PTTG3P	26255	1.33031	4.36982	-15.8851	5.28561e-54	2.74355e-52	111.91
PTTG1	1.31437	0.214492	CNOT6	57472	1.31437	6.34591	-14.2464	3.34833e-44	7.96031e-43	89.5068	NM_001303241
PTTG1	1.30901	0.154668	GNPDA1	10007	1.30901	8.02606	-12.4807	1.21931e-34	1.56288e-33	67.6771	NM_005471
PTTG1	1.30784	0.165815	LAGE3	8270	1.30784	6.10966	-15.0103	1.15787e-48	3.96891e-47	99.701	NM_006014
PTTG1	1.30315	0.170335	FAM216A	29902	1.30315	5.40796	-11.3497	4.33157e-29	3.92306e-28	55.0215	NM_013300
PTTG1	1.29898	0.0984427	TMEM38B	55151	1.29898	6.95936	-11.1204	5.07732e-28	4.28123e-27	52.5862	NM_018112
PTTG1	1.29336	0.234539	RAD51C	5889	1.29336	5.32587	-15.5705	4.69314e-52	2.06498e-50	107.455	NM_058216
PTTG1	1.27471	0.183906	RMI1	80010	1.27471	6.88714	-11.2631	1.10316e-28	9.67966e-28	54.0965	NM_024945
PTTG1	1.26402	0.381979	STMN1	3925	1.26402	5.40611	-15.3344	1.29809e-50	5.09963e-49	104.159	NM_203401
PTTG1	1.25952	0.4086	BUB1	699	1.25952	4.21258	-16.1153	1.895e-55	1.14077e-53	115.215	NM_004336
PTTG1	1.2554	0.253052	DEPDC1	55635	1.2554	4.2305	-10.5219	2.5399e-25	1.81958e-24	46.4405	NM_017779
PTTG1	1.24995	0.275162	CENPN	55839	1.24995	5.26603	-12.9785	3.1553e-37	4.73687e-36	73.5806	NM_018455
PTTG1	1.24722	0.189192	SLC35F6	54978	1.24722	5.80977	-12.8789	1.05606e-36	1.52851e-35	72.3832	NM_017877
PTTG1	1.23933	0.0725731	BCAT2	587	1.23933	5.43776	-13.6313	9.47567e-41	1.7887e-39	81.6225	NM_001284325
PTTG1	1.2355	0.242814	GINS1	9837	1.2355	5.73907	-4.50707	6.90147e-06	1.46917e-05	2.60803	NM_021067
PTTG1	1.22111	0.134276	ATP5G1	516	1.22111	8.67966	-10.1609	9.30385e-24	6.12495e-23	42.8825
PTTG1	1.19201	0.347392	CDC25C	995	1.19201	4.18742	-14.9742	1.89996e-48	6.43963e-47	99.2094	NM_022809
PTTG1	1.18434	0.130567	ZNF544	27300	1.18434	6.426	-10.0008	4.43084e-23	2.82026e-22	41.3411	NM_014480
PTTG1	1.16764	0.168382	DCTN2	10540	1.16764	6.92982	-14.7779	2.7608e-47	8.45715e-46	96.5531	NM_006400
PTTG1	1.16371	0.0757602	GM2A	2760	1.16371	5.68743	-9.82995	2.28597e-22	1.39698e-21	39.7211	NM_001167607
PTTG1	1.1608	0.0398261	CBR3	874	1.1608	4.73654	-8.05092	1.30278e-15	5.3436e-15	24.3968	NM_001236
PTTG1	1.15862	0.263687	H2AFX	3014	1.15862	5.15733	-12.4909	1.08028e-34	1.38987e-33	67.797	NM_002105
PTTG1	1.13297	0.150916	ANKRD27	84079	1.13297	6.99228	-5.36863	8.72817e-08	2.16936e-07	6.80591	NM_032139
PTTG1	1.12266	0.0716617	SRP19	6728	1.12266	7.2978	-10.0503	2.74132e-23	1.75689e-22	41.8153	NM_003135
PTTG1	1.10815	0.173617	BORA	79866	1.10815	5.50955	-7.43038	1.51673e-13	5.51789e-13	19.7283	NM_024808
PTTG1	1.10221	0.0538059	B9D1	27077	1.10221	4.83648	-7.42533	1.57438e-13	5.72245e-13	19.6918	NM_015681
PTTG1	1.10202	0.094932	PLXNC1	10154	1.10202	5.10491	-4.64171	3.64927e-06	7.92892e-06	3.21671	NM_005761
PTTG1	1.09867	0.182191	DTYMK	1841	1.09867	4.62292	-6.14924	9.14898e-10	2.60845e-09	11.2252	NM_012145
PTTG1	1.06231	0.105111	DIAPH3	81624	1.06231	4.18754	-7.12629	1.37291e-12	4.70466e-12	17.5708	NM_030932
PTTG1	1.06029	0.037037	CDKN2B	1030	1.06029	4.51673	-4.82131	1.51908e-06	3.41715e-06	4.05604	NM_078487
PTTG1	1.0477	0.0944217	EFCAB11	90141	1.0477	5.05303	-4.34917	1.42597e-05	2.94944e-05	1.91664	NM_145231
PTTG1	-1.05681	-0.0829314	KCNAB1	7881	-1.05681	4.23636	7.95311	2.82248e-15	1.1365e-14	23.6374	NM_172160
PTTG1	-1.06098	-0.0980151	ADAMTS13	11093	-1.06098	4.77807	4.76316	2.0242e-06	4.50732e-06	3.78086	NM_139027
PTTG1	-1.06492	-0.135583	TBXA2R	6915	-1.06492	4.44127	6.72311	2.23497e-11	7.10539e-11	14.8434	NM_201636
PTTG1	-1.0873	-0.111807	DMD	1756	-1.0873	5.48259	6.22475	5.71256e-10	1.65443e-09	11.6834	NM_004023
PTTG1	-1.09291	-0.0686581	SCARF1	8578	-1.09291	5.02825	6.16577	8.25623e-10	2.36004e-09	11.325	NM_145350
PTTG1	-1.13552	-0.0889295	SORBS1	10580	-1.13552	6.22383	12.0646	1.51804e-32	1.68671e-31	62.8981	NM_024991
PTTG1	-1.14849	-0.108424	ZC2HC1C	79696	-1.14849	4.71898	8.02486	1.60213e-15	6.55368e-15	24.1936	NM_024643
PTTG1	-1.15907	-0.0968477	KDSR	2531	-1.15907	6.87304	11.6204	2.238e-30	2.17358e-29	57.954	NM_002035
PTTG1	-1.18734	-0.046129	ADRA1B	147	-1.18734	4.45409	13.8769	4.10816e-42	8.66006e-41	84.7353	NM_000679
PTTG1	-1.19698	-0.210881	PDE2A	5138	-1.19698	4.8372	10.2937	2.50661e-24	1.70106e-23	44.1781	NM_002599
PTTG1	-1.20098	-0.0620306	SESN1	27244	-1.20098	7.51618	8.5063	3.17941e-17	1.42327e-16	28.0476	NM_014454
PTTG1	-1.20798	-0.102071	SUN2	25777	-1.20798	9.19348	10.1738	8.19312e-24	5.41435e-23	43.0081	NM_015374
PTTG1	-1.22408	-0.212327	KAZN	23254	-1.22408	4.75427	17.6977	8.06432e-66	1.09639e-63	138.939	NM_201628
PTTG1	-1.22679	-0.172386	CDC37L1	55664	-1.22679	6.73802	7.1786	9.45595e-13	3.26626e-12	17.9358	NM_017913
PTTG1	-1.25548	-0.0759479	HPS5	11234	-1.25548	7.84833	9.69098	8.52273e-22	5.04279e-21	38.4223	NM_181508
PTTG1	-1.26116	-0.124685	PLCG2	5336	-1.26116	7.21864	10.2885	2.63867e-24	1.78768e-23	44.1274	NM_002661
PTTG1	-1.26221	-0.115651	TRPM8	79054	-1.26221	5.32926	11.0877	7.18899e-28	6.02401e-27	52.2421	NM_024080
PTTG1	-1.28422	-0.157243	NPY1R	4886	-1.28422	5.53381	7.57334	5.22922e-14	1.9638e-13	20.7723	NM_000909
PTTG1	-1.29704	-0.174286	SUCLG2	8801	-1.29704	9.27234	12.0889	1.15015e-32	1.29339e-31	63.173	NM_003848
PTTG1	-1.29949	-0.180156	GGT5	2687	-1.29949	5.26403	9.69974	7.84851e-22	4.64841e-21	38.5036	NM_004121
PTTG1	-1.3003	-0.0543089	DIP2C	22982	-1.3003	6.63214	12.481	1.214e-34	1.55773e-33	67.6814	NM_014974
PTTG1	-1.3073	-0.309317	ESR1	2099	-1.3073	4.70021	19.3289	2.86614e-77	1.23858e-74	165.143	NM_001328100
PTTG1	-1.30764	-0.223575	LIFR	3977	-1.30764	5.34825	9.88126	1.40023e-22	8.6664e-22	40.205	NM_002310
PTTG1	-1.33591	-0.128932	ACADVL	37	-1.33591	10.1191	13.6205	1.08526e-40	2.03592e-39	81.488	NM_001270448
PTTG1	-1.3568	-0.194618	NTF3	4908	-1.3568	4.66418	17.3212	2.76683e-63	3.04352e-61	133.138	NM_002527
PTTG1	-1.36551	-0.0675599	CCDC198	55195	-1.36551	6.47178	12.2841	1.21183e-33	1.46338e-32	65.402	NM_018168
PTTG1	-1.36668	-0.168794	BDH2	56898	-1.36668	7.34085	10.5833	1.36124e-25	9.92227e-25	47.057	NM_020139
PTTG1	-1.38393	-0.139732	SULT1A1	6817	-1.38393	8.49889	13.1341	4.70607e-38	7.42419e-37	75.4669	NM_177536
PTTG1	-1.40915	-0.134658	SLC4A4	8671	-1.40915	6.01443	14.4305	2.9321e-45	7.62976e-44	91.9232	NM_003759
PTTG1	-1.42146	-0.188798	FOXO1	2308	-1.42146	7.37581	13.3908	1.95438e-39	3.39283e-38	78.6212	NM_002015
PTTG1	-1.42516	-0.276154	GPM6A	2823	-1.42516	5.09911	10.3781	1.08001e-24	7.51475e-24	45.01	NM_201592
PTTG1	-1.4728	-0.0790255	CYFIP2	26999	-1.4728	6.89273	12.0685	1.45143e-32	1.61715e-31	62.9426	NM_014376
PTTG1	-1.49288	-0.155299	ALDH1B1	219	-1.49288	7.47625	12.7595	4.44358e-36	6.20154e-35	70.9591	NM_000692
PTTG1	-1.55865	-0.181233	GADD45B	4616	-1.55865	8.04896	12.8498	1.50042e-36	2.15108e-35	72.0351	NM_015675
PTTG1	-1.56892	-0.208101	LONP2	83752	-1.56892	8.31229	16.1753	7.9096e-56	4.83365e-54	116.083	NM_031490
PTTG1	-1.57611	-0.181386	TMEM47	83604	-1.57611	7.82844	12.9985	2.47417e-37	3.74856e-36	73.8217	NM_031442
PTTG1	-1.5865	-0.196906	C1RL	51279	-1.5865	8.97685	17.0679	1.33091e-61	1.25812e-59	129.29	NM_016546
PTTG1	-1.59992	-0.155322	RAB17	64284	-1.59992	8.94254	15.2897	2.42124e-50	9.27033e-49	103.54	NM_022449
PTTG1	-1.6458	-0.205148	COLEC10	10584	-1.6458	4.78696	16.3998	2.94404e-57	1.97905e-55	119.352	NM_006438
PTTG1	-1.72005	-0.198214	LYVE1	10894	-1.72005	5.40322	14.3407	9.6418e-45	2.38093e-43	90.742	NM_006691
PTTG1	-1.72415	-0.291872	GABARAPL1	23710	-1.72415	8.98563	16.6018	1.4779e-58	1.06444e-56	122.324	NM_031412
PTTG1	-1.72997	-0.231701	PAMR1	25891	-1.72997	5.45266	18.2968	6.13612e-70	1.32584e-67	148.364	NM_015430
PTTG1	-1.74315	-0.322389	CPEB3	22849	-1.74315	6.38668	18.4481	5.39833e-71	1.25615e-68	150.78	NM_014912
PTTG1	-1.79017	-0.201015	KBTBD11	9920	-1.79017	5.22915	18.1762	4.22217e-69	8.24003e-67	146.447	NM_014867
PTTG1	-1.89333	-0.207044	STEAP3	55240	-1.89333	7.58999	18.1885	3.46793e-69	6.87901e-67	146.643	NM_182915
PTTG1	-1.93241	-0.211778	DPT	1805	-1.93241	5.74329	16.0809	3.12588e-55	1.83608e-53	114.718	NM_001937
PTTG1	-1.9422	-0.355839	FCN2	2220	-1.9422	5.28033	20.6618	3.7165e-87	7.49495e-84	187.778	NM_015837
PTTG1	-2.05148	-0.204741	RND3	390	-2.05148	9.22736	17.1658	2.99357e-62	2.87478e-60	130.772	NM_005168
PTTG1	-2.06906	-0.19508	DCN	1634	-2.06906	7.90552	14.8776	7.1188e-48	2.26678e-46	97.8983	NM_133507
PTTG1	-2.30563	-0.141881	CDHR2	54825	-2.30563	6.93926	20.2646	3.66654e-84	4.92946e-81	180.923	NM_017675
PTTG1	-2.38487	-0.226391	SRPX	8406	-2.38487	6.43048	16.0753	3.3896e-55	1.98136e-53	114.638	NM_006307
PTTG1	-2.42247	-0.221944	CXCL12	6387	-2.42247	8.09939	16.1131	1.95787e-55	1.17279e-53	115.183	NM_199168
PTTG1	-2.47664	-0.177038	FOSB	2354	-2.47664	6.7342	15.0114	1.14014e-48	3.91922e-47	99.7163	NM_006732
PTTG1	-2.51396	-0.269319	ECM1	1893	-2.51396	6.40357	22.1811	5.72254e-99	3.46214e-95	214.828	NM_022664
PTTG1	-2.51924	-0.338806	DNASE1L3	1776	-2.51924	7.73334	17.573	5.63292e-65	7.40852e-63	137.008	NM_004944
PTTG1	-2.56307	-0.204123	CXCL14	9547	-2.56307	5.84844	20.5468	2.76092e-86	4.17589e-83	185.784	NM_004887
PTTG1	-2.60277	-0.258954	C7	730	-2.60277	7.94085	14.1088	2.03075e-43	4.61014e-42	87.7184	NM_000587
PTTG1	-2.62292	-0.291435	VIPR1	7433	-2.62292	5.96787	23.1916	4.00554e-107	4.8467e-103	233.506	NM_004624
PTTG1	-2.92153	-0.19194	HGFAC	3083	-2.92153	7.92536	18.0156	5.41935e-68	9.64325e-66	143.911	NM_001528
PTTG1	-3.35242	-0.322269	CLEC1B	51266	-3.35242	5.94796	20.5886	1.33137e-86	2.30137e-83	186.509	NM_016509
PTTG1	-3.66793	-0.355932	NAT2	10	-3.66793	7.38771	20.0357	1.8704e-82	1.61656e-79	177.013	NM_000015
PTTG1	-3.80216	-0.165141	SLCO1B3	28234	-3.80216	8.36371	17.4225	5.80722e-64	6.69213e-62	134.69	NM_019844
PTTG1	-3.9518	-0.321609	FCN3	8547	-3.9518	8.11085	20.1182	4.5476e-83	5.00236e-80	178.419	NM_173452
PTTG1	-5.5717	-0.210933	HAMP	57817	-5.5717	9.75289	18.2848	7.43883e-70	1.55189e-67	148.173	NM_021175
PTTG1	-5.63689	-0.316905	CYP1A2	1544	-5.63689	8.90824	21.2858	6.11022e-92	2.00965e-88	198.733	NM_000761
ANKS1A	1.29898	-0.0699809	TMEM38B	55151	1.29898	6.95936	-11.1204	5.07732e-28	4.28123e-27	52.5862	NM_018112
ANKS1A	1.28475	-0.0599956	DRAP1	10589	1.28475	8.03251	-12.0791	1.28564e-32	1.44039e-31	63.0627	NM_006442
ANKS1A	1.21698	0.0604221	ARID5B	84159	1.21698	6.51885	-8.58773	1.60503e-17	7.30575e-17	28.7203	NM_032199
ANKS1A	1.19064	-0.0688798	COMMD4	54939	1.19064	6.66153	-12.841	1.66761e-36	2.3823e-35	71.9304	NM_017828
ANKS1A	1.1819	-0.0391054	FHIT	2272	1.1819	5.18316	-7.42335	1.59755e-13	5.80318e-13	19.6775	NM_002012
ANKS1A	1.17604	-0.0588711	MRPS7	51081	1.17604	7.83263	-8.25425	2.5404e-16	1.08312e-15	26.0035	NM_015971
ANKS1A	1.10477	-0.0394955	TMOD3	29766	1.10477	5.45208	-5.54859	3.20942e-08	8.21015e-08	7.77307	NM_014547
ANKS1A	1.04975	0.0502832	BICRAL	23506	1.04975	6.89725	-3.15223	0.00164109	0.00274233	-2.53266	NM_015349
ANKS1A	1.03317	0.0358283	UBR2	23304	1.03317	6.71056	-3.01439	0.00260304	0.00424657	-2.95478	NM_015255
ANKS1A	1.0102	0.0500136	FOXJ3	22887	1.0102	6.51039	-0.941386	0.346606	0.399612	-7.03499	NM_014947
ANKS1A	-1.00331	-0.0203815	RDH11	51109	-1.00331	8.00839	0.216114	0.828918	0.853537	-7.45352	NM_016026
ANKS1A	-1.04971	0.0453074	ZZEF1	23140	-1.04971	5.19527	4.35413	1.39435e-05	2.88749e-05	1.93797	NM_015113
ANKS1A	-1.07959	0.0713879	ZNF274	10782	-1.07959	7.20876	4.34256	1.46922e-05	3.03475e-05	1.88822	NM_133502
ANKS1A	-1.08893	0.0646376	TRAM2	9697	-1.08893	6.18154	4.29328	1.83334e-05	3.76118e-05	1.67772	NM_012288
ANKS1A	-1.14351	0.0856396	SMAD7	4092	-1.14351	6.26987	5.75542	9.79183e-09	2.59827e-08	8.92292	NM_005904
ANKS1A	-1.16439	0.0553219	NDEL1	81565	-1.16439	7.19558	10.9134	4.51171e-27	3.58448e-26	50.4255	NM_030808
ANKS1A	-1.42339	0.0575334	MAP2K1	5604	-1.42339	8.0736	14.1742	8.63659e-44	2.00581e-42	88.5667	NM_002755
ANKS1A	-1.42516	0.101282	GPM6A	2823	-1.42516	5.09911	10.3781	1.08001e-24	7.51475e-24	45.01	NM_201592
ANKS1A	-1.57761	0.0710286	DBH	1621	-1.57761	4.70254	19.7584	2.09814e-80	1.26937e-77	172.32	NM_000787
ANKS1A	-1.6458	0.0881672	COLEC10	10584	-1.6458	4.78696	16.3998	2.94404e-57	1.97905e-55	119.352	NM_006438
ANKS1A	-1.72997	0.100952	PAMR1	25891	-1.72997	5.45266	18.2968	6.13612e-70	1.32584e-67	148.364	NM_015430
ANKS1A	-1.90285	0.0874903	OLFML3	56944	-1.90285	6.56445	15.4599	2.23312e-51	9.38219e-50	105.907	NM_020190
ANKS1A	-2.38487	0.0919774	SRPX	8406	-2.38487	6.43048	16.0753	3.3896e-55	1.98136e-53	114.638	NM_006307
ANKS1A	-2.62292	0.101275	VIPR1	7433	-2.62292	5.96787	23.1916	4.00554e-107	4.8467e-103	233.506	NM_004624
AR	1.59131	-0.225331	CLIC1	1192	1.59131	9.54326	-17.0048	3.46849e-61	3.08593e-59	128.338	NM_001288
AR	1.55854	-0.0766448	COL5A2	1290	1.55854	7.32201	-11.9387	6.35527e-32	6.7455e-31	61.4801	NM_000393
AR	1.53061	-0.242149	PAFAH1B3	5050	1.53061	5.81846	-13.3062	5.60898e-39	9.40009e-38	77.5758	NM_002573
AR	1.48827	-0.173723	C1orf106	55765	1.48827	5.4428	-9.71445	6.83247e-22	4.06655e-21	38.6404
AR	1.44951	-0.15793	SERPINH1	871	1.44951	7.0217	-11.7552	5.00309e-31	5.0532e-30	59.4371	NM_001235
AR	1.38592	-0.266808	LRRC1	55227	1.38592	5.15104	-13.435	1.12411e-39	1.98275e-38	79.1696	NM_018214
AR	1.31544	-0.185978	ARID3A	1820	1.31544	5.09651	-8.98329	5.32898e-19	2.66229e-18	32.0735	NM_005224
AR	1.28287	-0.207208	MAPK13	5603	1.28287	5.10936	-8.06707	1.14572e-15	4.71377e-15	24.523	NM_002754
AR	1.27729	-0.0965008	PIK3R2	5296	1.27729	7.39771	-13.3187	4.80203e-39	8.11517e-38	77.7298	NM_005027
AR	1.26737	-0.198794	TMED3	23423	1.26737	6.5978	-7.19232	8.57088e-13	2.97071e-12	18.032	NM_007364
AR	1.23913	-0.0654421	GSDME	1687	1.23913	6.88046	-6.61608	4.57069e-11	1.42283e-10	14.145	NM_004403
AR	1.22896	-0.131364	ETV4	2118	1.22896	4.65662	-8.90235	1.08187e-18	5.29128e-18	31.3759	NM_001986
AR	1.1864	-0.14398	PRKCD	5580	1.1864	4.93271	-9.49968	5.0737e-21	2.83565e-20	36.6621	NM_212539
AR	1.16618	-0.108616	MGAT4A	11320	1.16618	5.20752	-9.79055	3.32526e-22	2.01784e-21	39.3512	NM_012214
AR	1.1246	-0.149247	PRDM4	11108	1.1246	6.60147	-8.98691	5.16217e-19	2.58108e-18	32.1048	NM_012406
AR	1.12147	-0.19382	MTMR2	8898	1.12147	5.2927	-6.85389	9.1913e-12	2.99125e-11	15.7114	NM_201281
AR	1.10498	-0.0878563	PDGFRL	5157	1.10498	4.35013	-6.5898	5.43966e-11	1.68553e-10	13.9751	NM_006207
AR	1.09438	-0.0502744	BCAS1	8537	1.09438	4.33607	-5.42898	6.2617e-08	1.56997e-07	7.12675	NM_003657
AR	1.06817	-0.0427441	GP2	2813	1.06817	4.20734	-3.32946	0.000883845	0.00152561	-1.96246	NM_001502
AR	1.06476	-0.0933656	NRSN2	80023	1.06476	5.07208	-4.45241	8.89605e-06	1.87693e-05	2.36593	NM_024958
AR	1.0541	0.0891125	LRRC2	79442	1.0541	5.92127	-2.09236	0.036515	0.0505528	-5.29582	NM_024512
AR	1.03812	-0.0477882	HAVCR1	26762	1.03812	4.01648	-2.38081	0.0173554	0.0252283	-4.65384	NM_012206
AR	1.03701	-0.0744102	SULT1C4	27233	1.03701	7.91968	-2.13998	0.032461	0.0452875	-5.19552	NM_006588
AR	1.01712	-0.043333	CSNK1G1	53944	1.01712	4.65848	-2.44459	0.0145761	0.0214511	-4.50076	NM_022048
AR	1.00857	0.0811986	DYSF	8291	1.00857	7.68877	-0.462669	0.643646	0.687207	-7.37007	NM_003494
AR	1.0074	-0.0273089	CYP27B1	1594	1.0074	4.21694	-0.827208	0.408205	0.461701	-7.13565	NM_000785
AR	1.00468	-0.0237892	NOVA1	4857	1.00468	3.98555	-0.514988	0.606611	0.653024	-7.34457	NM_006491
AR	-1.00374	-0.0375078	ZNF280B	140883	-1.00374	4.10001	0.531517	0.595112	0.642505	-7.33594	NM_080764
AR	-1.02462	0.0653437	KCNB1	3745	-1.02462	4.60006	1.28614	0.198524	0.241009	-6.65227	NM_004975
AR	-1.06657	0.158947	REPS2	9185	-1.06657	5.46567	4.18947	2.90136e-05	5.84328e-05	1.242	NM_004726
AR	-1.09286	0.15659	IL13RA1	3597	-1.09286	8.94699	3.62836	0.000291426	0.000531062	-0.930862	NM_001560
AR	-1.10991	0.146671	CFHR1	3078	-1.10991	12.4011	2.70499	0.00688091	0.0106198	-3.83403	NM_002113
AR	-1.11762	0.149213	SALL1	6299	-1.11762	7.21575	3.83881	0.000126961	0.000239811	-0.151994	NM_002968
AR	-1.11927	0.116758	C3	718	-1.11927	12.3151	4.45591	8.75316e-06	1.84775e-05	2.38137	NM_000064
AR	-1.12268	0.0923787	GIPC2	54810	-1.12268	5.99985	4.00209	6.47677e-05	0.000125995	0.48216	NM_017655
AR	-1.13201	0.125168	RNF128	79589	-1.13201	9.72452	6.60346	4.96933e-11	1.54533e-10	14.0634	NM_194463
AR	-1.14998	0.186466	F8	2157	-1.14998	6.6705	4.90466	1.00118e-06	2.28829e-06	4.45612	NM_019863
AR	-1.15588	0.229341	HSD17B4	3295	-1.15588	10.2422	7.19072	8.66997e-13	3.00334e-12	18.0207	NM_001292028
AR	-1.16003	0.110534	UGT2B4	7363	-1.16003	11.5326	3.51042	0.000455979	0.000813888	-1.34837	NM_021139
AR	-1.16176	0.0948888	C4A	720	-1.16176	9.95694	5.78423	8.27344e-09	2.20504e-08	9.08631	NM_007293
AR	-1.16852	0.135592	RXRA	6256	-1.16852	8.8978	6.95868	4.45906e-12	1.48064e-11	16.4184	NM_002957
AR	-1.17375	0.133397	GFRA1	2674	-1.17375	4.91885	7.46141	1.20564e-13	4.41802e-13	19.9533	NM_145793
AR	-1.17694	0.148019	ABCC9	10060	-1.17694	4.83843	10.1122	1.49923e-23	9.73216e-23	42.4113	NM_020297
AR	-1.18405	0.0938363	TTPA	7274	-1.18405	6.09202	4.32314	1.60359e-05	3.30384e-05	1.80499	NM_000370
AR	-1.18434	0.147329	EDEM1	9695	-1.18434	8.37492	8.48627	3.75832e-17	1.67683e-16	27.883	NM_014674
AR	-1.19817	0.124724	EI24	9538	-1.19817	9.28574	9.50721	4.7325e-21	2.64985e-20	36.7308	NM_004879
AR	-1.202	0.194585	CFHR2	3080	-1.202	12.361	4.16394	3.24295e-05	6.49772e-05	1.13649	NM_005666
AR	-1.20568	0.170094	CRAT	1384	-1.20568	7.64368	12.0536	1.72081e-32	1.90851e-31	62.774	NM_004003
AR	-1.2064	0.15296	NNT	23530	-1.2064	8.08821	7.27456	4.73975e-13	1.67204e-12	18.612	NM_182977
AR	-1.2073	0.136929	CFB	629	-1.2073	10.7193	7.79651	9.55648e-15	3.74218e-14	22.4399	NM_001710
AR	-1.21478	0.251738	KAT2B	8850	-1.21478	8.39709	8.30463	1.68461e-16	7.25662e-16	26.4074	NM_003884
AR	-1.22637	0.191838	MYLK	4638	-1.22637	7.52009	9.63385	1.45679e-21	8.49503e-21	37.8932	NM_053032
AR	-1.23039	0.151486	SLC31A1	1317	-1.23039	8.48182	9.64286	1.33896e-21	7.82301e-21	37.9765	NM_001859
AR	-1.24286	0.17337	MAOB	4129	-1.24286	8.56237	9.13325	1.41323e-19	7.2612e-19	33.3815	NM_000898
AR	-1.25196	0.121387	HLX	3142	-1.25196	5.65885	9.37943	1.53167e-20	8.2997e-20	35.5723	NM_021958
AR	-1.2603	0.173656	ALDH9A1	223	-1.2603	11.6451	12.2741	1.36081e-33	1.63839e-32	65.2871	NM_000696
AR	-1.26218	0.274012	KLF9	687	-1.26218	7.8259	9.37349	1.61696e-20	8.75012e-20	35.5189	NM_001206
AR	-1.26269	0.166424	SELENOP	6414	-1.26269	10.918	9.63365	1.45953e-21	8.50681e-21	37.8914	NM_005410
AR	-1.26405	0.210817	CFHR5	81494	-1.26405	9.3134	3.76426	0.000171217	0.000319464	-0.432863	NM_030787
AR	-1.2682	0.178072	AADAC	13	-1.2682	11.1205	5.6694	1.61213e-08	4.21222e-08	8.43971	NM_001086
AR	-1.27003	0.177255	PIK3R1	5295	-1.27003	8.10085	9.62057	1.64947e-21	9.57248e-21	37.7707	NM_181524
AR	-1.27113	0.0562413	PTPRD	5789	-1.27113	4.91187	13.1387	4.44468e-38	7.03934e-37	75.5236	NM_130393
AR	-1.27371	0.252173	CDC14B	8555	-1.27371	6.10166	13.7163	3.215e-41	6.28458e-40	82.6945	NM_033331
AR	-1.305	0.173915	RORA	6095	-1.305	6.18233	10.3669	1.20894e-24	8.39735e-24	44.8986	NM_134262
AR	-1.31088	0.120106	SLC6A13	6540	-1.31088	5.04651	13.3727	2.45119e-39	4.21897e-38	78.3966	NM_016615
AR	-1.32014	0.182619	KLHL2	11275	-1.32014	8.22144	13.0054	2.27276e-37	3.45483e-36	73.9059	NM_007246
AR	-1.33199	0.206169	MYO1B	4430	-1.33199	8.92474	12.8698	1.17769e-36	1.69845e-35	72.2752	NM_012223
AR	-1.33617	0.267739	ALAS1	211	-1.33617	9.4176	9.11027	1.73429e-19	8.8731e-19	33.1797	NM_199166
AR	-1.33892	0.149953	GPHN	10243	-1.33892	6.41552	11.1545	3.53155e-28	2.99474e-27	52.9453	NM_020806
AR	-1.34118	0.214953	MARC2	54996	-1.34118	9.45885	10.3215	1.90163e-24	1.30072e-23	44.451
AR	-1.34538	0.182272	METTL7A	25840	-1.34538	9.17013	10.5543	1.82804e-25	1.32371e-24	46.7656	NM_014033
AR	-1.34616	0.271338	ALDH5A1	7915	-1.34616	8.03844	12.1916	3.53273e-33	4.12606e-32	64.3422	NM_170740
AR	-1.35293	0.0962719	KLF11	8462	-1.35293	7.82012	13.7445	2.24209e-41	4.43289e-40	83.052	NM_003597
AR	-1.35334	0.182951	ACAT1	38	-1.35334	10.3112	10.571	1.54257e-25	1.1217e-24	46.9334	NM_000019
AR	-1.39221	0.220369	ABCG2	9429	-1.39221	6.76584	7.67353	2.45188e-14	9.37962e-14	21.5153	NM_004827
AR	-1.40984	0.219043	EXPH5	23086	-1.40984	5.24298	12.2262	2.37048e-33	2.80653e-32	64.7374	NM_015065
AR	-1.43016	0.101754	ZCCHC6	79670	-1.43016	7.9384	12.9982	2.48264e-37	3.75499e-36	73.8183
AR	-1.47288	0.300529	ECM2	1842	-1.47288	7.2692	11.3911	2.76612e-29	2.53754e-28	55.4653	NM_001393
AR	-1.48894	0.248976	CPT2	1376	-1.48894	8.46306	15.2289	5.65007e-50	2.11659e-48	102.699	NM_001330589
AR	-1.50033	0.197529	CES1	1066	-1.50033	11.8808	9.32627	2.48601e-20	1.33633e-19	35.0947	NM_001266
AR	-1.509	0.157212	SERPINA10	51156	-1.509	10.6359	11.1552	3.50451e-28	2.97785e-27	52.9529	NM_016186
AR	-1.50972	0.217818	KCNJ8	3764	-1.50972	8.26486	10.9977	1.86069e-27	1.51714e-26	51.3015	NM_004982
AR	-1.53994	0.116399	SAA1	6288	-1.53994	8.7518	6.25909	4.60303e-10	1.34015e-09	11.8936	NM_199161
AR	-1.55538	0.188175	C4BPA	722	-1.55538	12.5832	9.12016	1.5881e-19	8.14581e-19	33.2665	NM_000715
AR	-1.5556	0.31155	ST3GAL6	10402	-1.5556	6.37607	18.6566	1.84612e-72	4.9992e-70	154.135	NM_006100
AR	-1.55639	0.244289	RIDA	10247	-1.55639	10.1918	11.7138	7.94435e-31	7.93779e-30	58.9793	NM_005836
AR	-1.56413	0.463337	SEC14L2	23541	-1.56413	6.92379	12.4275	2.27636e-34	2.87815e-33	67.0586	NM_033382
AR	-1.56484	0.338776	ABAT	18	-1.56484	9.07771	13.3875	2.03743e-39	3.52857e-38	78.5799	NM_020686
AR	-1.56858	0.305161	SLC16A2	6567	-1.56858	7.394	13.7449	2.23202e-41	4.4202e-40	83.0565	NM_006517
AR	-1.5865	0.179429	C1RL	51279	-1.5865	8.97685	17.0679	1.33091e-61	1.25812e-59	129.29	NM_016546
AR	-1.59171	0.0707214	EFHD1	80303	-1.59171	6.74181	10.6123	1.01363e-25	7.44233e-25	47.3485	NM_025202
AR	-1.60285	0.205801	GADD45G	10912	-1.60285	7.34102	11.1545	3.53181e-28	2.99474e-27	52.9453	NM_006705
AR	-1.62754	0.295235	RUNDC3B	154661	-1.62754	7.45861	12.4763	1.28344e-34	1.64161e-33	67.6263	NM_138290
AR	-1.6396	0.179205	HP	3240	-1.6396	14.1115	9.51449	4.42417e-21	2.4818e-20	36.7972	NM_005143
AR	-1.64035	0.298958	HSD17B6	8630	-1.64035	11.5754	7.98267	2.23643e-15	9.06254e-15	23.866	NM_003725
AR	-1.64496	0.23014	CSAD	51380	-1.64496	7.26855	19.9643	6.33621e-82	5.11121e-79	175.8	NM_015989
AR	-1.65463	0.361531	ABCA6	23460	-1.65463	8.6529	12.3637	4.803e-34	5.97904e-33	66.3188	NM_080284
AR	-1.66708	0.232245	ITIH4	3700	-1.66708	8.73283	14.2667	2.56197e-44	6.13857e-43	89.7724	NM_002218
AR	-1.67094	0.298046	GNE	10020	-1.67094	9.42356	15.8658	6.9706e-54	3.55883e-52	111.635	NM_005476
AR	-1.67842	0.177226	CFI	3426	-1.67842	11.1635	14.8034	1.95371e-47	6.03058e-46	96.8963	NM_001331035
AR	-1.68536	0.105	ALPL	249	-1.68536	6.16597	15.5299	8.32805e-52	3.5861e-50	106.886	NM_001177520
AR	-1.69148	0.14262	APCS	325	-1.69148	12.3062	9.55508	3.03666e-21	1.72586e-20	37.1685	NM_001639
AR	-1.69995	0.261377	HPR	3250	-1.69995	11.409	9.93302	8.51994e-23	5.32772e-22	40.6955	NM_020995
AR	-1.72763	0.233779	CYP3A43	64816	-1.72763	6.77171	15.1166	2.67671e-49	9.55403e-48	101.155	NM_057096
AR	-1.73199	0.284462	SULT2A1	6822	-1.73199	11.4724	9.84415	1.99648e-22	1.22378e-21	39.8548	NM_003167
AR	-1.74315	0.222606	CPEB3	22849	-1.74315	6.38668	18.4481	5.39833e-71	1.25615e-68	150.78	NM_014912
AR	-1.76314	0.269976	CUX2	23316	-1.76314	7.65268	12.3433	6.09119e-34	7.50543e-33	66.0834	NM_015267
AR	-1.77284	0.368962	ACSM2A	123876	-1.77284	9.17842	11.9515	5.49845e-32	5.86178e-31	61.6235	NM_001308954
AR	-1.84266	0.305607	FMO3	2328	-1.84266	11.1488	10.6868	4.72429e-26	3.53956e-25	48.1031	NM_006894
AR	-1.84648	0.237886	C8B	732	-1.84648	10.8802	12.549	5.44708e-35	7.17189e-34	68.4755	NM_001278544
AR	-1.87272	0.287517	CFHR4	10877	-1.87272	9.68523	10.2297	4.72503e-24	3.17275e-23	43.5518	NM_006684
AR	-1.89108	0.227936	AOX1	316	-1.89108	10.5411	11.2828	8.92337e-29	7.86973e-28	54.3064	NM_001159
AR	-1.91401	0.334487	HAO1	54363	-1.91401	10.0159	12.7651	4.15676e-36	5.80794e-35	71.0252	NM_017545
AR	-1.97269	0.255213	MAT1A	4143	-1.97269	10.9465	16.0142	8.21942e-55	4.62581e-53	113.758	NM_000429
AR	-2.39851	0.368428	C8A	731	-2.39851	10.9524	16.0214	7.3967e-55	4.2217e-53	113.863	NM_000562
AR	-2.40209	0.290939	C6	729	-2.40209	10.9857	14.4874	1.37435e-45	3.67914e-44	92.6751	NM_001115131
AR	-2.59572	0.338768	ADH1C	126	-2.59572	11.5446	13.9458	1.68812e-42	3.65407e-41	85.6175	NM_000669
AR	-2.75801	0.261625	F9	2158	-2.75801	11.1356	15.4012	5.09242e-51	2.07469e-49	105.088	NM_001313913
AR	-2.96809	0.32627	ADH1B	125	-2.96809	10.3929	17.9839	8.95473e-68	1.54789e-65	143.412	NM_001286650
AR	-2.98964	0.28922	CYP3A4	1576	-2.98964	9.41052	17.188	2.1335e-62	2.09881e-60	131.109	NM_017460
AR	-5.63689	0.245926	CYP1A2	1544	-5.63689	8.90824	21.2858	6.11022e-92	2.00965e-88	198.733	NM_000761
ARID3A	2.14602	0.168121	PEG10	23089	2.14602	6.05333	-11.4563	1.35865e-29	1.26265e-28	56.1689	NM_015068
ARID3A	1.68497	0.276078	IGF2BP2	10644	1.68497	6.14174	-12.6839	1.09774e-35	1.50597e-34	70.0628	NM_006548
ARID3A	1.65982	0.164121	DKK1	22943	1.65982	4.93432	-7.85078	6.27818e-15	2.48417e-14	22.8523	NM_012242
ARID3A	1.63909	0.318861	AFP	174	1.63909	6.46128	-6.31014	3.33234e-10	9.79386e-10	12.2082	NM_001354717
ARID3A	1.57603	0.132874	VIL1	7429	1.57603	5.39147	-11.0655	9.09978e-28	7.55194e-27	52.009	NM_007127
ARID3A	1.53296	0.216321	DLK1	8788	1.53296	4.86027	-6.80058	1.32287e-11	4.26068e-11	15.3556	NM_003836
ARID3A	1.4499	0.2216	NT5DC2	64943	1.4499	4.69502	-12.7711	3.86469e-36	5.41863e-35	71.0974	NM_022908
ARID3A	1.38592	0.209776	LRRC1	55227	1.38592	5.15104	-13.435	1.12411e-39	1.98275e-38	79.1696	NM_018214
ARID3A	1.36539	0.135584	TRIM28	10155	1.36539	8.29807	-13.1519	3.77891e-38	6.00063e-37	75.6845	NM_005762
ARID3A	1.34398	-0.0899752	LGALS4	3960	1.34398	9.23211	-4.76008	2.05506e-06	4.57267e-06	3.76637	NM_006149
ARID3A	1.33729	0.123076	TNFSF4	7292	1.33729	5.01715	-9.38841	1.41091e-20	7.66591e-20	35.6533	NM_003326
ARID3A	1.32286	0.193093	ALDH18A1	5832	1.32286	7.26934	-11.7668	4.39822e-31	4.4609e-30	59.5647	NM_002860
ARID3A	1.2322	0.244634	H2AFY2	55506	1.2322	6.52064	-6.58848	5.48699e-11	1.69976e-10	13.9667	NM_018649
ARID3A	1.1997	0.185352	MMP11	4320	1.1997	4.52786	-10.4112	7.75252e-25	5.42542e-24	45.3377	NM_005940
ARID3A	1.19606	0.177254	TTLL4	9654	1.19606	4.89882	-10.3329	1.69738e-24	1.1643e-23	44.5633	NM_014640
ARID3A	1.18959	0.0914643	GNG4	2786	1.18959	4.40047	-7.87977	5.01074e-15	1.9931e-14	23.0737	NM_004485
ARID3A	1.18952	0.196333	SOBP	55084	1.18952	4.98739	-6.07068	1.48508e-09	4.16731e-09	10.7541	NM_018013
ARID3A	1.18855	0.168616	PTBP1	5725	1.18855	9.34517	-11.9735	4.28598e-32	4.59348e-31	61.8702	NM_031991
ARID3A	1.18243	0.0923952	TNNC1	7134	1.18243	4.25266	-7.0534	2.29881e-12	7.7632e-12	17.0664	NM_003280
ARID3A	1.18157	0.155097	BCL9	607	1.18157	4.98916	-10.5276	2.39698e-25	1.72127e-24	46.4977	NM_004326
ARID3A	1.17849	0.354698	HIC2	23119	1.17849	4.97475	-8.95841	6.62943e-19	3.29024e-18	31.8584	NM_015094
ARID3A	1.16877	0.0732723	FRRS1L	23732	1.16877	4.07246	-6.90161	6.62009e-12	2.17435e-11	16.0321	NM_014334
ARID3A	1.16469	0.16125	QARS	5859	1.16469	10.5297	-9.57136	2.61018e-21	1.49188e-20	37.3178	NM_005051
ARID3A	1.15942	0.16974	MMS19	64210	1.15942	7.31633	-8.79714	2.69228e-18	1.28863e-17	30.4779	NM_022362
ARID3A	1.15904	0.104094	CHKA	1119	1.15904	6.93189	-7.33614	3.02946e-13	1.08291e-12	19.0505	NM_212469
ARID3A	1.15476	0.143325	CTNND2	1501	1.15476	4.31181	-6.00205	2.25666e-09	6.27139e-09	10.3474	NM_001332
ARID3A	1.15236	0.0954976	BEX4	56271	1.15236	6.03344	-4.51088	6.77978e-06	1.44454e-05	2.62501	NM_001127688
ARID3A	1.1519	0.0637325	MBNL3	55796	1.1519	6.59761	-4.98394	6.69341e-07	1.55392e-06	4.84292	NM_133486
ARID3A	1.14753	0.225194	FGFR4	2264	1.14753	6.33459	-6.42829	1.56314e-10	4.69098e-10	12.9457	NM_213647
ARID3A	1.14391	0.168976	FAM222B	55731	1.14391	6.51134	-7.98293	2.23183e-15	9.04694e-15	23.868	NM_018182
ARID3A	1.13663	0.101627	NAALADL1	10004	1.13663	4.5538	-7.28154	4.50607e-13	1.59146e-12	18.6615	NM_005468
ARID3A	1.13269	0.232854	SALL2	6297	1.13269	5.18191	-5.52157	3.73685e-08	9.50313e-08	7.62586	NM_005407
ARID3A	1.13223	-0.0751165	GCLM	2730	1.13223	8.58174	-4.6796	3.04078e-06	6.64741e-06	3.3912	NM_002061
ARID3A	1.13178	0.145251	PLAG1	5324	1.13178	4.76372	-5.13818	3.00688e-07	7.18611e-07	5.6129	NM_002655
ARID3A	1.12059	-0.152566	FGGY	55277	1.12059	7.34592	-2.59667	0.0094731	0.0143424	-4.11952	NM_018291
ARID3A	1.12038	0.136585	CHST10	9486	1.12038	4.58782	-7.7815	1.07294e-14	4.19063e-14	22.3263	NM_004854
ARID3A	1.11756	0.24946	PDE9A	5152	1.11756	4.67457	-5.11432	3.40821e-07	8.10841e-07	5.49225	NM_002606
ARID3A	1.11526	0.103741	ATP2B1	490	1.11526	6.94088	-5.78431	8.26958e-09	2.20449e-08	9.08676	NM_001682
ARID3A	1.11497	0.0300569	UNC93A	54346	1.11497	5.28008	-3.59668	0.000329084	0.000597169	-1.04436	NM_018974
ARID3A	1.11369	-0.0724519	PLS1	5357	1.11369	8.31977	-4.64455	3.59975e-06	7.82555e-06	3.22977	NM_002670
ARID3A	1.10979	0.142863	PLEKHB1	58473	1.10979	4.37296	-3.83567	0.000128584	0.000242687	-0.163935	NM_021200
ARID3A	1.10928	0.109983	NT5C2	22978	1.10928	7.66737	-6.94573	4.87859e-12	1.6164e-11	16.3305	NM_012229
ARID3A	1.10517	0.0954925	SLC35D2	11046	1.10517	7.85332	-5.8305	6.30147e-09	1.69402e-08	9.35041	NM_007001
ARID3A	1.10217	0.060089	C1orf186	440712	1.10217	4.679	-3.88096	0.000106966	0.000203633	0.00920864
ARID3A	1.10207	0.0717425	MPZL2	10205	1.10207	6.25428	-5.13416	3.07126e-07	7.33129e-07	5.59249	NM_144765
ARID3A	1.10043	-0.0600587	EFR3A	23167	1.10043	9.84064	-4.75399	2.11732e-06	4.70861e-06	3.73777	NM_015137
ARID3A	1.0947	0.0379208	PGAM2	5224	1.0947	4.13652	-4.90507	9.99064e-07	2.2839e-06	4.45814	NM_000290
ARID3A	1.09192	0.157901	KHSRP	8570	1.09192	6.52628	-5.85707	5.38448e-09	1.45559e-08	9.503	NM_003685
ARID3A	1.09022	0.110783	MCM3AP-AS1	114044	1.09022	4.27189	-6.09944	1.24452e-09	3.50997e-09	10.9259
ARID3A	1.08488	0.0958598	SAYSD1	55776	1.08488	5.18472	-5.69416	1.39763e-08	3.67e-08	8.57804	NM_018322
ARID3A	1.08436	0.0971701	MYCN	4613	1.08436	4.33612	-7.81957	7.99677e-15	3.14977e-14	22.6148	NM_005378
ARID3A	1.07614	0.072282	SLC7A10	56301	1.07614	4.11324	-4.70317	2.71284e-06	5.96066e-06	3.50042	NM_019849
ARID3A	1.07569	0.0753116	SNORD83B	116938	1.07569	10.6325	-4.61569	4.13284e-06	8.93947e-06	3.09773
ARID3A	1.07246	0.114897	ZNF518A	9849	1.07246	5.6819	-4.96174	7.49653e-07	1.73372e-06	4.73402	NM_014803
ARID3A	1.07241	0.0864256	GNAS	2778	1.07241	8.16793	-6.26718	4.37407e-10	1.27502e-09	11.9433	NM_080426
ARID3A	1.07005	0.137072	ASXL1	171023	1.07005	6.9417	-4.06774	4.90661e-05	9.66939e-05	0.744487	NM_015338
ARID3A	1.06685	-0.111457	GNG12	55970	1.06685	7.38025	-2.99217	0.00279943	0.00455222	-3.02107	NM_018841
ARID3A	1.06087	0.124069	PTGDR2	11251	1.06087	3.9885	-6.79128	1.40921e-11	4.52174e-11	15.2938	NM_004778
ARID3A	1.06029	0.111353	ANGEL1	23357	1.06029	6.05983	-3.9033	9.76105e-05	0.000186792	0.0953808	NM_015305
ARID3A	1.0582	0.173734	BRD3	8019	1.0582	6.82928	-3.90365	9.74727e-05	0.000186558	0.0967114	NM_007371
ARID3A	1.05619	0.0961223	ARID3B	10620	1.05619	5.15468	-3.05187	0.00230012	0.00377171	-2.84184	NM_006465
ARID3A	1.05541	-0.110319	CAV2	858	1.05541	7.23424	-2.25559	0.0241894	0.0343213	-4.94265	NM_198212
ARID3A	1.05463	0.0406671	GALNT2	2590	1.05463	7.58802	-2.89678	0.0038057	0.00607284	-3.30013	NM_004481
ARID3A	1.04856	0.0638518	BCAS4	55653	1.04856	4.52672	-5.62302	2.10327e-08	5.45075e-08	8.18213	NM_198799
ARID3A	1.0447	0.129993	CCR6	1235	1.0447	5.04331	-2.72137	0.00654995	0.01014	-3.78983	NM_031409
ARID3A	1.04206	0.130644	ELP1	8518	1.04206	6.14417	-2.59196	0.00960344	0.0145319	-4.13167	NM_003640
ARID3A	1.04104	0.0703084	CCNJ	54619	1.04104	4.99078	-2.31369	0.0207721	0.0297834	-4.81057	NM_019084
ARID3A	1.03981	0.056731	LRP2	4036	1.03981	4.19956	-2.18794	0.0287743	0.0404424	-5.09224	NM_004525
ARID3A	1.03558	-0.055071	LONRF3	79836	1.03558	5.59345	-1.7681	0.0771765	0.101304	-5.91901	NM_024778
ARID3A	1.03414	0.0280585	MTMR7	9108	1.03414	4.03572	-3.25384	0.00115501	0.00196674	-2.20952	NM_004686
ARID3A	1.03409	0.0948797	ZNF813	126017	1.03409	5.06237	-1.84148	0.0656801	0.0873713	-5.78713	NM_001004301
ARID3A	1.03382	-0.036326	DYRK3	8444	1.03382	4.61156	-4.74752	2.18545e-06	4.85211e-06	3.70743	NM_003582
ARID3A	1.03319	0.0708337	ZNF135	7694	1.03319	4.13331	-3.2561	0.0011459	0.00195231	-2.20222	NM_007134
ARID3A	1.03303	0.0597457	CD7	924	1.03303	4.81074	-1.83409	0.0667696	0.0887133	-5.80065	NM_006137
ARID3A	1.03255	0.13025	NCOA3	8202	1.03255	6.57807	-2.00344	0.0452472	0.0617796	-5.47711	NM_181659
ARID3A	1.03237	0.0683091	PALM	5064	1.03237	4.59036	-2.67863	0.00744493	0.0114377	-3.90457	NM_002579
ARID3A	1.0323	0.0375033	HOXC10	3226	1.0323	4.06571	-1.6641	0.0962291	0.124028	-6.09678	NM_017409
ARID3A	1.03021	0.0321847	ENPP3	5169	1.03021	4.36695	-1.64868	0.099349	0.127763	-6.12221	NM_005021
ARID3A	1.02625	0.0364864	NRXN3	9369	1.02625	4.20226	-1.61937	0.105504	0.135076	-6.16992	NM_138970
ARID3A	1.02599	0.0886299	LDOC1	23641	1.02599	4.83856	-0.93535	0.349706	0.402649	-7.04064	NM_012317
ARID3A	1.02278	0.0345094	COX10	1352	1.02278	6.38073	-1.58593	0.112893	0.143759	-6.22332	NM_001303
ARID3A	1.02181	-0.104519	PIGK	10026	1.02181	6.98489	-1.09186	0.275009	0.324328	-6.8825	NM_005482
ARID3A	1.01658	0.0356097	INHA	3623	1.01658	4.12026	-1.44445	0.148749	0.185311	-6.43689	NM_002191
ARID3A	1.01581	0.0529982	GDF10	2662	1.01581	4.17972	-1.55762	0.119461	0.151279	-6.26764	NM_004962
ARID3A	1.01535	0.049774	GFRA3	2676	1.01535	3.91819	-1.44802	0.147748	0.184152	-6.43174	NM_001496
ARID3A	1.01526	0.0399452	ATP6V1B1	525	1.01526	4.12545	-2.47766	0.0132958	0.0196721	-4.41979	NM_001692
ARID3A	1.01321	-0.106583	PSMB8	5696	1.01321	7.80185	-0.442493	0.658174	0.701172	-7.37918	NM_148919
ARID3A	1.01119	0.108317	HIF1AN	55662	1.01119	5.26627	-0.933484	0.350668	0.403603	-7.04237	NM_017902
ARID3A	1.00889	0.104805	MVB12B	89853	1.00889	4.46356	-1.55924	0.119077	0.150856	-6.26513	NM_033446
ARID3A	1.00881	-0.135656	UQCRQ	27089	1.00881	12.1276	-0.444377	0.656812	0.699844	-7.37834	NM_014402
ARID3A	1.0049	0.0316473	ART3	419	1.0049	3.85091	-0.650601	0.515369	0.566906	-7.26576	NM_001179
ARID3A	-0.997813	-0.0417055	MICAL2	9645	-0.997813	5.84653	-0.161224	0.871931	0.891756	-7.46385	NM_032867
ARID3A	-0.999221	-0.148117	NAMPT	10135	-0.999221	8.77621	-0.0241687	0.98072	0.983565	-7.47652	NM_005746
ARID3A	-1.00079	0.094459	HMGA2	8091	-1.00079	4.24093	0.0305681	0.975617	0.979827	-7.47634	NM_003484
ARID3A	-1.00135	0.12871	FRAS1	80144	-1.00135	4.30056	0.103269	0.917759	0.931149	-7.47149	NM_025074
ARID3A	-1.00447	-0.0921206	AKR7A2	8574	-1.00447	8.82361	0.202079	0.839873	0.863054	-7.45644	NM_003689
ARID3A	-1.00507	0.06586	MNX1	3110	-1.00507	4.27379	0.440079	0.659921	0.702662	-7.38024	NM_005515
ARID3A	-1.00686	0.0429302	LGALS14	56891	-1.00686	4.04131	0.51549	0.60626	0.652879	-7.34431	NM_203471
ARID3A	-1.00839	-0.0718738	AK2	204	-1.00839	7.40042	0.637498	0.523864	0.575152	-7.27417	NM_013411
ARID3A	-1.01051	0.0540027	CDKN1C	1028	-1.01051	4.94559	0.590276	0.555064	0.604362	-7.30308	NM_001362475
ARID3A	-1.01703	0.0771021	NSUN7	79730	-1.01703	4.13674	2.23446	0.0255482	0.0361221	-4.98986	NM_024677
ARID3A	-1.01715	-0.0654654	RNLS	55328	-1.01715	5.00694	1.27109	0.203826	0.246975	-6.67145	NM_018363
ARID3A	-1.0214	-0.0726493	TM2D3	80213	-1.0214	9.01715	1.44232	0.149347	0.185902	-6.43995	NM_078474
ARID3A	-1.02491	0.0754898	ZNF586	54807	-1.02491	4.77082	2.58193	0.00988609	0.0149285	-4.15746	NM_017652
ARID3A	-1.03501	0.190708	FGFR3	2261	-1.03501	6.86657	1.66952	0.0951495	0.122767	-6.08777	NM_022965
ARID3A	-1.04076	0.0396052	OBSL1	23363	-1.04076	5.04278	2.78432	0.00540777	0.00845619	-3.61759	NM_015311
ARID3A	-1.05259	0.0721303	INPP5A	3632	-1.05259	6.78072	3.35584	0.000804078	0.00139629	-1.87495	NM_005539
ARID3A	-1.06247	0.0340313	ABCA1	19	-1.06247	8.30926	3.50139	0.000471625	0.000840371	-1.37977	NM_005502
ARID3A	-1.06474	-0.0402164	RNASEL	6041	-1.06474	4.84359	5.53037	3.55659e-08	9.06758e-08	7.67369	NM_021133
ARID3A	-1.07117	-0.0679484	RER1	11079	-1.07117	7.27618	6.13934	9.72775e-10	2.76694e-09	11.1655	NM_007033
ARID3A	-1.07218	-0.173222	ABCB1	5243	-1.07218	8.72088	1.73278	0.0832677	0.108594	-5.98058	NM_001348946
ARID3A	-1.07426	-0.0975779	NUDT9	53343	-1.07426	7.68054	3.69309	0.000226691	0.000417816	-0.695906	NM_198038
ARID3A	-1.0788	-0.0821213	PRRG1	5638	-1.0788	6.46069	3.56248	0.000374817	0.000675196	-1.16576	NM_001173490
ARID3A	-1.07957	-0.102012	SLC22A18	5002	-1.07957	8.05039	2.35117	0.0187982	0.0271559	-4.7236	NM_183233
ARID3A	-1.08364	-0.0959004	TAPBPL	55080	-1.08364	6.90045	3.27257	0.00108146	0.00184774	-2.14884	NM_018009
ARID3A	-1.09538	-0.0556686	WLS	79971	-1.09538	6.4177	2.52705	0.0115688	0.0172882	-4.29688	NM_024911
ARID3A	-1.10706	0.0787889	PLXNB1	5364	-1.10706	6.18957	4.95882	7.60894e-07	1.75904e-06	4.71972	NM_002673
ARID3A	-1.11029	-0.119134	WDR44	54521	-1.11029	6.28355	6.16585	8.25218e-10	2.35944e-09	11.3255	NM_019045
ARID3A	-1.11808	-0.122593	SLC39A8	64116	-1.11808	5.64715	6.4365	1.48238e-10	4.45747e-10	12.9974	NM_022154
ARID3A	-1.12006	-0.0865048	WDR7	23335	-1.12006	5.98928	8.97702	5.63093e-19	2.8085e-18	32.0192	NM_052834
ARID3A	-1.13016	-0.0478971	PIGR	5284	-1.13016	5.86764	3.81848	0.000137816	0.000259504	-0.229102	NM_002644
ARID3A	-1.15162	-0.200401	SOD1	6647	-1.15162	13.1648	7.68219	2.29546e-14	8.79793e-14	21.5799	NM_000454
ARID3A	-1.15201	0.046018	OVGP1	5016	-1.15201	6.16811	5.7381	1.08318e-08	2.86669e-08	8.82506	NM_002557
ARID3A	-1.18696	-0.0604669	IFI44	10561	-1.18696	6.33609	4.76447	2.0112e-06	4.4792e-06	3.78703	NM_006417
ARID3A	-1.21478	-0.203892	KAT2B	8850	-1.21478	8.39709	8.30463	1.68461e-16	7.25662e-16	26.4074	NM_003884
ARID3A	-1.22905	-0.0583	HEXIM1	10614	-1.22905	7.12005	12.8885	9.40085e-37	1.36391e-35	72.4985	NM_006460
ARID3A	-1.24331	-0.0860869	MOCOS	55034	-1.24331	7.64935	6.57621	5.95047e-11	1.83863e-10	13.8875	NM_017947
ARID3A	-1.28324	-0.195225	SCP2	6342	-1.28324	10.4725	10.8737	6.83205e-27	5.37851e-26	50.0151	NM_002979
ARID3A	-1.30199	-0.189076	ACADM	34	-1.30199	10.7561	9.537	3.59131e-21	2.02965e-20	37.003	NM_001286044
ARID3A	-1.30925	-0.159479	CTBS	1486	-1.30925	7.8472	11.7443	5.65408e-31	5.69171e-30	59.316	NM_004388
ARID3A	-1.32345	-0.197163	SLC1A1	6505	-1.32345	6.8492	7.02494	2.80759e-12	9.43138e-12	16.8709	NM_004170
ARID3A	-1.33932	-0.12437	PAPSS2	9060	-1.33932	8.73334	10.6354	8e-26	5.90965e-25	47.5824	NM_004670
ARID3A	-1.35695	-0.0522888	MLPH	79083	-1.35695	7.28938	8.77084	3.3763e-18	1.60335e-17	30.255	NM_024101
ARID3A	-1.48145	-0.189584	MTHFD1	4522	-1.48145	8.86605	14.3518	8.32574e-45	2.07287e-43	90.8876	NM_005956
ARID3A	-1.49829	-0.199338	GADD45A	1647	-1.49829	9.57184	12.892	9.01346e-37	1.31085e-35	72.5402	NM_001924
ARID3A	-1.57741	-0.0847883	UGT2B17	7367	-1.57741	5.74618	7.80892	8.68323e-15	3.41127e-14	22.534	NM_001077
ARID3A	-1.6367	-0.185978	AR	367	-1.6367	6.60489	14.4485	2.30585e-45	6.03913e-44	92.1616	NM_001348064
ARID3A	-1.64035	-0.206511	HSD17B6	8630	-1.64035	11.5754	7.98267	2.23643e-15	9.06254e-15	23.866	NM_003725
ARID3A	-1.65463	-0.206493	ABCA6	23460	-1.65463	8.6529	12.3637	4.803e-34	5.97904e-33	66.3188	NM_080284
ARID3A	-1.71639	-0.206236	SLC46A3	283537	-1.71639	8.42631	11.8648	1.46414e-31	1.522e-30	60.6537	NM_181785
ARID3A	-1.83085	-0.21482	ETNPPL	64850	-1.83085	9.05566	10.458	4.84316e-25	3.42503e-24	45.8026	NM_031279
ARID3A	-1.91401	-0.276926	HAO1	54363	-1.91401	10.0159	12.7651	4.15676e-36	5.80794e-35	71.0252	NM_017545
ARID3A	-1.93565	-0.275266	AKR7A3	22977	-1.93565	8.95352	14.6287	2.07124e-46	5.86932e-45	94.5531	NM_012067
ARID3A	-1.99695	-0.239872	ACSM5	54988	-1.99695	7.79987	14.822	1.51698e-47	4.73078e-46	97.1474	NM_017888
ARID3A	-2.12211	-0.233133	CYP2C8	1558	-2.12211	9.39758	13.94	1.81955e-42	3.93152e-41	85.5431	NM_001198855
ARID3A	-2.24139	-0.245381	HSD11B1	3290	-2.24139	10.2403	10.6094	1.04345e-25	7.65196e-25	47.3198	NM_181755
ARID3A	-2.4349	-0.202219	SLC10A1	6554	-2.4349	10.373	12.291	1.1189e-33	1.35658e-32	65.481	NM_003049
ARID3A	-2.47534	-0.195265	GYS2	2998	-2.47534	8.08895	14.222	4.61546e-44	1.08652e-42	89.1883	NM_021957
ARID3A	-2.59572	-0.216202	ADH1C	126	-2.59572	11.5446	13.9458	1.68812e-42	3.65407e-41	85.6175	NM_000669
ARID3A	-2.69189	-0.227098	GLYAT	10249	-2.69189	7.85057	16.0154	8.07484e-55	4.56568e-53	113.776	NM_201648
ARNT2	1.30136	0.122564	SOX4	6659	1.30136	5.96247	-8.52302	2.76438e-17	1.23977e-16	28.1852	NM_003107
ARNT2	1.09701	0.0576801	OCA2	4948	1.09701	4.69782	-4.8244	1.49599e-06	3.37023e-06	4.07073	NM_001300984
ARNT2	1.05161	0.0584518	ABCA3	21	1.05161	4.27088	-4.73885	2.2802e-06	5.04857e-06	3.66678	NM_001089
ARNT2	1.03235	0.0434518	SARM1	23098	1.03235	4.35035	-4.14413	3.53418e-05	7.0532e-05	1.05501	NM_015077
ARNT2	1.02985	0.100747	PCNX2	80003	1.02985	4.27703	-3.19924	0.00139659	0.0023523	-2.38442	NM_014801
ARNT2	1.02776	0.0532965	MMP10	4319	1.02776	4.1368	-2.05131	0.0403493	0.0554867	-5.38048	NM_002425
ARNT2	1.0203	0.0380616	MARK1	4139	1.0203	4.14151	-1.79153	0.0733386	0.0967613	-5.87747	NM_018650
ARNT2	1.01773	0.0816779	SLCO3A1	28232	1.01773	5.02711	-1.22449	0.220893	0.265581	-6.7294	NM_013272
ARNT2	1.00834	0.0197299	PAX6	5080	1.00834	4.07944	-0.514558	0.606911	0.653229	-7.34479	NM_001604
ARNT2	1.00634	0.0347169	DIRAS2	54769	1.00634	4.3085	-0.325261	0.745013	0.779747	-7.42405	NM_017594
ARNT2	-1.01317	0.0266589	CELSR1	9620	-1.01317	4.29832	1.77501	0.0760279	0.0999453	-5.90682	NM_014246
ARNT2	-1.01335	0.0190334	COLGALT2	23127	-1.01335	4.12052	1.26632	0.205525	0.248934	-6.67747	NM_015101
ARNT2	-1.05422	0.0494057	SCTR	6344	-1.05422	4.16468	2.90922	0.00365795	0.00584924	-3.26423	NM_002980
ARNT2	-1.3638	-0.140629	SERPINC1	462	-1.3638	12.8576	5.54227	3.32593e-08	8.50279e-08	7.73857	NM_000488
ARNT2	-1.7147	-0.132632	MTTP	4547	-1.7147	10.1243	11.4262	1.88616e-29	1.74218e-28	55.8443	NM_001300785
ARNT2	-1.7354	-0.141654	CYP2J2	1573	-1.7354	9.61516	13.5624	2.2635e-40	4.16871e-39	80.7589	NM_000775
ARNT2	-1.78917	-0.131703	CIDEB	27141	-1.78917	9.70596	13.2788	7.88454e-39	1.31048e-37	77.2382	NM_014430
ARNT2	-1.81055	-0.133603	PLG	5340	-1.81055	11.6009	11.0834	7.52581e-28	6.29318e-27	52.1969	NM_001168338
ASCL1	2.5208	-0.0290043	ACSL4	2182	2.5208	6.83393	-17.5776	5.24528e-65	6.9745e-63	137.079	NM_022977
ASCL1	1.68497	-0.0262422	IGF2BP2	10644	1.68497	6.14174	-12.6839	1.09774e-35	1.50597e-34	70.0628	NM_006548
ASCL1	1.59131	-0.0296348	CLIC1	1192	1.59131	9.54326	-17.0048	3.46849e-61	3.08593e-59	128.338	NM_001288
ASCL1	1.5257	-0.0316686	ANXA2	302	1.5257	9.37664	-17.0196	2.76879e-61	2.50018e-59	128.562	NM_004039
ASCL1	1.47286	-0.0261097	SOX9	6662	1.47286	7.23352	-8.64399	9.97322e-18	4.59543e-17	29.1886	NM_000346
ASCL1	1.43851	0.0296852	GPR88	54112	1.43851	6.09373	-6.11298	1.14492e-09	3.2421e-09	11.007	NM_022049
ASCL1	1.3537	-0.0267115	SINHCAF	58516	1.3537	6.76066	-10.9197	4.22288e-27	3.36164e-26	50.4909	NM_021238
ASCL1	1.31387	-0.0284306	ASAP1	50807	1.31387	6.7585	-10.7227	3.26692e-26	2.47215e-25	48.4678	NM_018482
ASCL1	1.21446	0.0340862	HSD17B14	51171	1.21446	5.69297	-5.97409	2.67278e-09	7.39552e-09	10.183	NM_016246
ASCL1	1.1713	-0.030362	EIF3E	3646	1.1713	11.0063	-8.06827	1.13486e-15	4.67226e-15	24.5324	NM_001568
ASCL1	1.12785	0.0249873	COL5A3	50509	1.12785	5.11725	-4.19648	2.81369e-05	5.6771e-05	1.27109	NM_015719
ASCL1	1.10502	0.0175146	AQP8	343	1.10502	4.20384	-5.96902	2.7559e-09	7.61508e-09	10.1533	NM_001169
ASCL1	1.10059	0.0309997	ABHD5	51099	1.10059	5.7532	-5.44097	5.85919e-08	1.4721e-07	7.19096	NM_016006
ASCL1	1.09706	0.0230794	SEC61A2	55176	1.09706	4.74588	-6.73438	2.07144e-11	6.6011e-11	14.9176	NM_018144
ASCL1	1.09397	0.0192467	SSX2IP	117178	1.09397	5.44557	-4.21078	2.64255e-05	5.34608e-05	1.3306	NM_014021
ASCL1	1.08851	0.0221332	GATA4	2626	1.08851	5.78392	-4.95145	7.89958e-07	1.82379e-06	4.6837	NM_002052
ASCL1	1.07659	0.0292961	TRIM9	114088	1.07659	4.27865	-3.86112	0.000115973	0.000220053	-0.0668653	NM_052978
ASCL1	1.07046	0.0518251	GCK	2645	1.07046	4.15122	-2.95309	0.0031779	0.00512428	-3.13647	NM_033508
ASCL1	1.06379	0.0150514	DIO2	1734	1.06379	4.08603	-5.94797	3.12856e-09	8.59769e-09	10.0301	NM_013989
ASCL1	1.04572	-0.028952	BAMBI	25805	1.04572	8.54209	-1.12249	0.26177	0.309741	-6.84869	NM_012342
ASCL1	1.0081	0.0324164	CPNE6	9362	1.0081	3.96387	-1.01453	0.310435	0.361597	-6.96368	NM_006032
ASCL1	-0.998587	0.0186312	MAPK4	5596	-0.998587	4.09131	-0.327643	0.743211	0.778265	-7.42328	NM_002747
ASCL1	-0.998758	0.0172261	HSD3B1	3283	-0.998758	4.20646	-0.0686114	0.945305	0.953739	-7.47446	NM_001328615
ASCL1	-1.00384	0.0149112	CAV3	859	-1.00384	4.0022	1.00155	0.316665	0.368215	-6.97672	NM_033337
ASCL1	-1.00751	0.0199965	GARNL3	84253	-1.00751	4.26678	1.20849	0.226981	0.272413	-6.74879	NM_032293
ASCL1	-1.01264	0.0429148	TBC1D2	55357	-1.01264	5.39572	0.725276	0.468356	0.520635	-7.21454	NM_018421
ASCL1	-1.03389	0.0278042	RET	5979	-1.03389	4.14243	4.82428	1.49687e-06	3.37157e-06	4.07017	NM_020975
ASCL1	-1.05582	0.0352931	FBXO2	26232	-1.05582	5.9481	2.35724	0.0184947	0.0267366	-4.70939	NM_012168
ASCL1	-1.08187	0.0173585	LRRC19	64922	-1.08187	3.92579	5.67501	1.56088e-08	4.08447e-08	8.47101	NM_022901
ASCL1	-1.12852	0.0268717	ARSD	414	-1.12852	5.67933	7.86635	5.56274e-15	2.20613e-14	22.9711	NM_009589
ASCL1	-1.13218	-0.0183754	RPS4Y1	6192	-1.13218	9.41196	1.59629	0.110562	0.140925	-6.2069	NM_001008
ASCL1	-1.14588	0.0426033	PEPD	5184	-1.14588	9.62585	5.59918	2.40958e-08	6.21927e-08	8.05049	NM_001166057
ASCL1	-1.17373	0.0263224	SLC25A10	1468	-1.17373	7.36615	7.53701	6.86668e-14	2.55809e-13	20.5052	NM_012140
ASCL1	-1.17694	0.0284259	ABCC9	10060	-1.17694	4.83843	10.1122	1.49923e-23	9.73216e-23	42.4113	NM_020297
ASCL1	-1.19085	0.0293996	MAD1L1	8379	-1.19085	6.41683	6.19262	6.98447e-10	2.00932e-09	11.4878	NM_003550
ASCL1	-1.2062	0.0348748	SLC28A1	9154	-1.2062	5.53336	7.0804	1.90039e-12	6.44471e-12	17.2527	NM_201651
ASCL1	-1.23334	0.0310329	SLC7A2	6542	-1.23334	5.58744	9.41513	1.10482e-20	6.01905e-20	35.8945	NM_003046
ASCL1	-1.23737	0.030053	MOGAT2	80168	-1.23737	4.78783	9.25568	4.71152e-20	2.49494e-19	34.4643	NM_025098
ASCL1	-1.25196	0.0315267	HLX	3142	-1.25196	5.65885	9.37943	1.53167e-20	8.2997e-20	35.5723	NM_021958
ASCL1	-1.27074	0.0301883	CCDC25	55246	-1.27074	7.37837	12.2866	1.17765e-33	1.42354e-32	65.4303	NM_018246
ASCL1	-1.27194	0.0272302	ACO1	48	-1.27194	9.28426	10.4069	8.09713e-25	5.66004e-24	45.2947	NM_002197
ASCL1	-1.2875	0.0616273	TTPAL	79183	-1.2875	6.76109	9.40381	1.22555e-20	6.66777e-20	35.7922	NM_024331
ASCL1	-1.29156	0.0343073	ARMC6	93436	-1.29156	6.84194	11.983	3.84611e-32	4.15147e-31	61.9775	NM_033415
ASCL1	-1.29288	0.0314106	FAHD2A	51011	-1.29288	6.67362	15.6655	1.22018e-52	5.70047e-51	108.793	NM_016044
ASCL1	-1.32996	0.0387334	PRKAG2	51422	-1.32996	5.54157	14.7641	3.32712e-47	1.00645e-45	96.3679	NM_024429
ASCL1	-1.34134	0.0270976	CISH	1154	-1.34134	5.93882	9.62087	1.64486e-21	9.55027e-21	37.7734	NM_145071
ASCL1	-1.35012	0.0332867	SHMT1	6470	-1.35012	6.93321	11.9918	3.48154e-32	3.77479e-31	62.0761	NM_148918
ASCL1	-1.35697	0.0281615	HADH	3033	-1.35697	9.56839	11.6789	1.17048e-30	1.15709e-29	58.5957	NM_005327
ASCL1	-1.36126	0.0455863	ADRA1A	148	-1.36126	4.65001	17.334	2.26964e-63	2.51951e-61	133.335	NM_033304
ASCL1	-1.36168	0.0323482	KHK	3795	-1.36168	7.73235	9.52963	3.84524e-21	2.16911e-20	36.9356	NM_006488
ASCL1	-1.36945	0.0321777	PSD3	23362	-1.36945	7.14501	10.4644	4.54052e-25	3.21476e-24	45.8664	NM_206909
ASCL1	-1.40354	0.0295275	ACAA2	10449	-1.40354	8.62964	12.7704	3.89758e-36	5.4521e-35	71.089	NM_006111
ASCL1	-1.4471	0.0274747	PCK2	5106	-1.4471	9.89986	10.6895	4.59488e-26	3.44474e-25	48.1306	NM_004563
ASCL1	-1.45288	0.0298049	TMEM131L	23240	-1.45288	7.45208	14.6593	1.37206e-46	3.9248e-45	94.9618	NM_015196
ASCL1	-1.49467	0.0303842	RETREG1	54463	-1.49467	5.74743	14.0899	2.60047e-43	5.87046e-42	87.4731	NM_019000
ASCL1	-1.49829	0.0419061	GADD45A	1647	-1.49829	9.57184	12.892	9.01346e-37	1.31085e-35	72.5402	NM_001924
ASCL1	-1.49896	0.0318819	SLC19A3	80704	-1.49896	5.89487	14.4394	2.60556e-45	6.80935e-44	92.0403	NM_025243
ASCL1	-1.51544	0.0268148	MPDZ	8777	-1.51544	8.70725	12.3558	5.26092e-34	6.50891e-33	66.2286	NM_003829
ASCL1	-1.52043	0.0303293	LIPG	9388	-1.52043	7.60228	11.0708	8.59474e-28	7.15735e-27	52.0655	NM_006033
ASCL1	-1.53027	0.027589	ENPEP	2028	-1.53027	7.57734	12.2324	2.20543e-33	2.61881e-32	64.8088	NM_001977
ASCL1	-1.53536	0.0339118	DAO	1610	-1.53536	7.63913	9.88962	1.29247e-22	8.01173e-22	40.2841	NM_001917
ASCL1	-1.54216	0.0342384	RAB26	25837	-1.54216	6.2724	13.3874	2.0384e-39	3.52857e-38	78.5795	NM_014353
ASCL1	-1.57471	0.0309682	ASPA	443	-1.57471	5.24573	13.9716	1.2095e-42	2.64647e-41	85.9482	NM_001128085
ASCL1	-1.60285	0.0432196	GADD45G	10912	-1.60285	7.34102	11.1545	3.53181e-28	2.99474e-27	52.9453	NM_006705
ASCL1	-1.63353	0.0286695	SRD5A1	6715	-1.63353	7.77863	14.5777	4.10796e-46	1.14267e-44	93.8735	NM_001324323
ASCL1	-1.6503	0.0270345	GPD1	2819	-1.6503	5.9026	16.6943	3.71978e-59	2.83078e-57	123.694	NM_005276
ASCL1	-1.71416	0.0274977	ECHDC2	55268	-1.71416	10.8689	17.8331	9.65213e-67	1.44186e-64	141.049	NM_018281
ASCL1	-1.7328	0.0281135	GREM2	64388	-1.7328	5.70143	13.9395	1.83065e-42	3.94845e-41	85.5371	NM_022469
ASCL1	-1.73561	0.0263754	ETFDH	2110	-1.73561	8.60531	15.5209	9.46208e-52	4.05997e-50	106.759	NM_004453
ASCL1	-1.73693	0.0332832	ACACB	32	-1.73693	7.8906	17.3359	2.20742e-63	2.47312e-61	133.363	NM_001093
ASCL1	-1.75542	0.034611	KDM8	79831	-1.75542	5.6403	19.7476	2.51825e-80	1.45099e-77	172.139	NM_024773
ASCL1	-1.83085	0.0326762	ETNPPL	64850	-1.83085	9.05566	10.458	4.84316e-25	3.42503e-24	45.8026	NM_031279
ASCL1	-1.85847	0.0330441	EPHX2	2053	-1.85847	8.80763	13.9766	1.13344e-42	2.48453e-41	86.0127	NM_001979
ASCL1	-1.94697	0.0331231	IGF1	3479	-1.94697	6.97813	14.7579	3.61797e-47	1.0836e-45	96.2847	NM_001111285
ASCL1	-1.95513	0.0287008	CTH	1491	-1.95513	8.45672	13.0416	1.46205e-37	2.23652e-36	74.3432	NM_153742
ASCL1	-2.4349	0.0265382	SLC10A1	6554	-2.4349	10.373	12.291	1.1189e-33	1.35658e-32	65.481	NM_003049
ASCL1	-2.46499	0.0403849	IGFALS	3483	-2.46499	6.52272	20.2096	9.46098e-84	1.14478e-80	179.98	NM_004970
ASCL1	-2.47692	0.0395287	GHR	2690	-2.47692	9.89118	16.5197	4.99964e-58	3.49686e-56	121.113	NM_001242462
[truncated: 6,105 more rows]
