# Supplementary material for: Discovering master regulators in hepatocellular carcinoma: one novel MR, SEC14L2 inhibits cancer cells
Source: Aging (Albany NY). 2019 Dec 18;11(24):12375–411. doi: 10.18632/aging.102579 (PMC6949064; doi:10.18632/aging.102579)
Supplement: Supplementary Table 7 [file aging-11-102579-s001..xlsx]

## Sheet: MR
	HCC6 cohort		GSE14520 cohort						LIHC
Regulon	P value			HR	95% CI lower	95% CI upper	P value			HR	95% CI lower	95% CI upper	P value
ESR1	0.0333		ESR1	0.531573	-1.54928	0.285454	0.176987		ESR1	0.868014	-0.216561	-0.0665332	0.000217015
PTTG1	0.0564		PTTG1	1.18826	-0.0563921	0.401374	0.139657		PTTG1	1.2702	0.122257	0.356099	6.088e-05
NR1I2	0.0382		NR1I2	0.666317	-0.638934	-0.173047	0.000635574		NR1I2	0.918492	-0.142122	-0.0279219	0.00351851
HMGA1	0.00535		HMGA1	1.32014	-0.157656	0.713137	0.211203		HMGA1	1.33968	0.14521	0.439647	9.89358e-05
PPARGC1A	0.00227		PPARGC1A	0.833402	-0.347007	-0.0174716	0.0301743		PPARGC1A	0.870782	-0.203408	-0.0733202	3.05514e-05
NR0B2	0.319		NR0B2	1.07839	-0.114295	0.265229	0.435706		NR0B2	0.978494	-0.112649	0.0691666	0.639259
NR1I3	0.00798		NR1I3	0.842773	-0.297664	-0.0444519	0.00809417		NR1I3	0.903253	-0.176045	-0.0274605	0.00726551
NR1H4	0.196		NR1H4	0.991987	-0.305648	0.289558	0.957744		NR1H4	0.895285	-0.24044	0.0192133	0.094938
PITX1	0.000652		PITX1	2.4655	0.0974508	1.70734	0.0280028		PITX1	1.05765	0.00107339	0.111024	0.0456915
AR	0.00551		AR	0.769271	-0.530585	0.0059603	0.0553118		AR	0.923633	-0.142982	-0.0158995	0.01427
PHF21A	0.00447		PHF21A	1.78131	0.257103	0.897593	0.000410117		PHF21A	1.57848	0.184651	0.728279	0.000996817
NR3C2	0.0913		NR3C2	0.807036	-0.586637	0.157863	0.258988		NR3C2	0.818961	-0.336117	-0.0633211	0.00410662
TRIP13	0.00234		TRIP13	1.26753	-0.000788217	0.474922	0.0507641		TRIP13	1.39562	0.211722	0.454961	7.7881e-08
TFAP2A	0.0234		TFAP2A	0.858712	-0.832934	0.528291	0.660922		TFAP2A	1.10095	0.0155742	0.17678	0.0193525
E2F8	0.317		E2F8	1.16071	-0.192758	0.490825	0.392765		E2F8	1.17815	0.0606352	0.267255	0.00186887
TCF21	0.498		TCF21	1.1773	-0.636779	0.963229	0.689237		TCF21	0.881969	-0.239284	-0.0119125	0.0303619
TARBP1	0.993		TARBP1	0.953296	-0.315255	0.219597	0.725933		TARBP1	1.04258	-0.154242	0.237648	0.676577
LEF1	0.0929		LEF1	0.807602	-1.1462	0.718832	0.653342		LEF1	1.00845	-0.0752725	0.0921105	0.8437
HLF	0.00734		HLF	0.808822	-0.361686	-0.0626669	0.00541114		HLF	0.870647	-0.229043	-0.047995	0.00270761
BCL11A	0.00703		BCL11A	1.14691	-0.368729	0.64287	0.595317		BCL11A	1.13118	0.0313202	0.215196	0.00859747
SMAD6	0.241		SMAD6	1.55863	-0.524371	1.41199	0.368953		SMAD6	0.867191	-0.294121	0.0091291	0.0654813
SEC14L2	0.0089		SEC14L2	0.842085	-0.342098	-0.00164997	0.0478203		SEC14L2	0.850207	-0.246292	-0.0782592	0.000153324
FOXM1	0.0629		FOXM1	1.2658	-0.0574985	0.528913	0.115116		FOXM1	1.25691	0.109913	0.347401	0.000160548
YEATS2	0.00584		YEATS2	1.41209	0.00918195	0.680958	0.0440576		YEATS2	1.8212	0.335603	0.863391	8.48684e-06
DIP2C	0.233		DIP2C	0.954092	-0.277954	0.183964	0.690035		DIP2C	0.92478	-0.210266	0.0538674	0.245831
E2F3	0.00756		E2F3	1.47293	0.0181662	0.756341	0.0397409		E2F3	1.30151	0.0762302	0.450823	0.0058214
MAF	0.096		MAF	0.874959	-0.41268	0.145524	0.348226		MAF	0.955741	-0.308278	0.217742	0.735862
TCEA2	0.00343		TCEA2	0.807202	-0.408191	-0.0201707	0.0304846		TCEA2	0.884594	-0.25563	0.0103775	0.0707562
LDB2	0.29		LDB2	0.80083	-0.512733	0.0685191	0.134166		LDB2	0.820619	-0.333478	-0.0619141	0.00432169
KLF9	0.000849		KLF9	0.892842	-0.312038	0.085347	0.263535		KLF9	0.796827	-0.356947	-0.0972879	0.000606555
MCM2	0.0694		MCM2	1.16453	-0.0560159	0.360651	0.151865		MCM2	1.35676	0.158845	0.451356	4.33914e-05
EGR1	0.926		EGR1	1.01013	-0.18126	0.201413	0.917788		EGR1	0.999044	-0.109076	0.107164	0.98617
PARP1	0.555		PARP1	1.08043	-0.328132	0.482858	0.708453		PARP1	1.12367	-0.153826	0.387021	0.39807
ARID3A	0.0188		ARID3A	1.11513	-0.0631107	0.281055	0.214549		ARID3A	1.12149	0.0142828	0.215036	0.0251656
GTF2IRD1	0.517		GTF2IRD1	1.18204	-0.190982	0.525471	0.360168		GTF2IRD1	1.18105	-0.0374249	0.370237	0.109576
EZH2	0.471		EZH2	1.12792	-0.0866908	0.327439	0.254538		EZH2	1.5053	0.231485	0.586496	6.30328e-06
POLR3C	0.88		POLR3C	1.28673	-0.170281	0.674493	0.242072		POLR3C	1.48708	0.120279	0.673356	0.00491672
SOX4	0.0194		SOX4	1.37104	0.155212	0.475926	0.000114765		SOX4	1.1435	0.0214303	0.246764	0.0196604
ILF2	0.262		ILF2	1.1975	-0.140389	0.500856	0.270563		ILF2	1.73784	0.234717	0.870566	0.000656891
HMGB2	0.12		HMGB2	1.13952	-0.0861209	0.347329	0.237553		HMGB2	1.32566	0.101908	0.461919	0.00214361
TRIM22	0.00172		TRIM22	0.788675	-0.414735	-0.0600671	0.00869424		TRIM22	0.92046	-0.197043	0.0312802	0.154755
ENO1	0.428		ENO1	1.51443	0.117249	0.712826	0.00630152		ENO1	1.61219	0.279603	0.675585	2.26931e-06
EHMT2	0.913		EHMT2	0.843937	-0.764228	0.424872	0.575922		EHMT2	1.30888	0.02431	0.514039	0.0311972
POGK	0.583		POGK	1.03765	-0.235643	0.309556	0.79046		POGK	1.67564	0.247854	0.784542	0.000163071
